# Supplementary material for: Soft interactions with hard Lewis acids: generation of mono- and dicationic alkaline-earth metal arene-complexes by direct oxidation
Source: PubMed Central journal article supplement — Chem Sci. 2020 Jan 13;11(8):2068–76. doi: 10.1039/c9sc06254h (PMC7057851; doi:10.1039/c9sc06254h), 2020-01-13
Supplement: SC-011-C9SC06254H-s001.pdf [file SC-011-C9SC06254H-s001.pdf]

Electronic Supporting Information

To

# Soft Interactions with Hard Lewis acids: Generation of Mono- and Dicationic Alkaline-Earth Metal Arene-Complexes by Direct Oxidation.

Marcel Schorpp and Ingo Krossing\*<sup>a</sup>

<sup>a</sup> Institut für Anorganische und Analytische Chemie and Freiburger Materialforschungszentrum (FMF), Universität Freiburg, Albertstr. 21, 79104 Freiburg, Germany. E-mail: krossing@uni-freiburg.de

## Contents

|         |                                                                                                                                                       |     |
|---------|-------------------------------------------------------------------------------------------------------------------------------------------------------|-----|
| S-1     | Experimental Details and Characterisation Techniques .....                                                                                            | 2   |
| S-1.1   | Oxidation of Mg with [HMB][Al(OR <sup>F</sup> ) <sub>4</sub> ] .....                                                                                  | 3   |
| S-1.1.1 | Mg turnings .....                                                                                                                                     | 3   |
| S-1.1.2 | Rieke Magnesium Mg* .....                                                                                                                             | 3   |
| S-1.2   | Synthesis of [Ca(HMB)(oDFB) <sub>2</sub> {f-al}][Al(OR <sup>F</sup> ) <sub>4</sub> ] <b>2</b> .....                                                   | 4   |
| S-1.3   | Synthesis of [HMB][al-f-al] .....                                                                                                                     | 5   |
| S-1.4   | Synthesis of [In(HMB)][al-f-al] .....                                                                                                                 | 6   |
| S-1.5   | Synthesis of [Ca(HMB)(oDFB) <sub>2</sub> {f-al}][al-f-al] <b>3</b> .....                                                                              | 9   |
| S-1.6   | Synthesis of [Ca(HMB)(oDFB) <sub>2</sub> {f-al}][al-f-al] <b>3</b> and serendipitous finding of [Ca(HMB)(oDFB) <sub>4</sub> ][al-f-al] <b>7</b> ..... | 10  |
| S-1.7   | Synthesis of [Ba(HMB)(oDFB) <sub>3</sub> {f-al}][al-f-al] <b>4</b> .....                                                                              | 14  |
| S-1.8   | Synthesis of [Sr(HMB)(oDFB) <sub>4</sub> ][al-f-al] <b>6</b> and serendipitous finding of [Sr(HMB)(oDFB) <sub>3</sub> {f-al}][al-f-al] <b>5</b> ..... | 18  |
| S-1.9   | Reaction between [Ba(HMB)(oDFB) <sub>3</sub> {f-al}][al-f-al] <b>4</b> and TMS-F-Al(OR <sup>F</sup> ) <sub>3</sub> .....                              | 21  |
| S-1.10  | Reaction between [Ba(HMB)(oDFB) <sub>3</sub> {f-al}][al-f-al] <b>4</b> and POEt <sub>3</sub> .....                                                    | 23  |
| S-1.11  | Reaction between POEt <sub>3</sub> and TMS-F-Al(OR <sup>F</sup> ) <sub>3</sub> .....                                                                  | 26  |
| S-2     | Crystallographic data .....                                                                                                                           | 28  |
| S-3     | Quantum chemical calculations .....                                                                                                                   | 88  |
| S-4     | References .....                                                                                                                                      | 285 |

## S-1 Experimental Details and Characterisation Techniques

All reactions and manipulations were carried out under an inert argon atmosphere, using standard Schlenk-line and glovebox (Box atmosphere kept below 1 ppm H<sub>2</sub>O/O<sub>2</sub>) techniques. Glassware has been stored over-night in an oven set to 180°C and flame dried under vacuum prior to use. C<sub>6</sub>Me<sub>6</sub> (Alfa Aesar, >99 %) was sublimed under dynamic vacuum prior to use. Ca (ABCR, 99.99 %), Sr (Alfa Aesar, 99.99 %) and Ba (Alfa Aesar, 99.99 %) were used as received. I<sub>2</sub> was sublimed under static vacuum. Pentane was collected from a solvent purification system (SPS) and oxygen removed by purging with Argon. PhF, *o*-DFB, CD<sub>2</sub>Cl<sub>2</sub>, hexane and heptane were refluxed/stirred over CaH<sub>2</sub> and distilled. All solvents were stored over activated 3 Å molecular sieves in gas tight ampoules.

**Powder Diffraction.** Powder diffractograms were recorded with the sample sealed with perfluoropolyalkylether oil (AB128330, abcr GmbH & Co. KG) in a 0.3 mm thick capillary (Hilgenberg GmbH, wall thickness 0.01 mm) at 100(10) K in the 2θ range 2.0-40.0° with a STOE STADI P powder diffractometer with Mo-K<sub>α1</sub> radiation (λ = 0.709300 Å) equipped with a Ge-(111) monochromator and Mythen 1K detector. Data acquiring, processing and the calculation of powder diffractograms from single-crystal data were performed using STOE WinXPOW® package. All powder diffractograms were background corrected.

**ATR-IR Spectroscopy.** ATR FT-IR spectra were recorded at ambient temperature on a ZnSe crystal on a FTIR Bruker ALPHA with a QuickSnap Platinum ATR sampling module inside an inert atmosphere glovebox. Spectra were recorded in a range from 4000-500 cm<sup>-1</sup>. The spectra were recorded with either 64 or 128 scans and a resolution of 2 cm<sup>-1</sup>. Data processing was carried out with the software package OPUS 7.5. For all spectra, signal intensity was normalised to one and the relative band intensities were described as follows: ≥ 0.8 = very very strong (vvs), ≥ 0.7 = very strong (vs), ≥ 0.6 = strong (s), ≥ 0.5 = medium strong (ms), ≥ 0.4 = medium (m), ≥ 0.3 = medium weak (mw), ≥ 0.2 = weak (w), ≥ 0.1 = very weak (vw), < 0.1 = very very weak (vww).

**Single crystal X-ray diffraction.** Single crystal X-ray diffraction data were collected using either a Bruker SMART APEXII QUAZAR detector with fixed-Chi D8 Goniometer, INCOATEC Mo microsource or Bruker D8 VENTURE with PHOTONIII detector, fixed-Chi D8 Goniometer and INCOATEC Mo/Cu microsource. Crystals were selected under perfluoropolyether oil, mounted on 0.1 to 0.3 mm diameter CryoLoops and quench-cooled using an Oxford Cryostream 800 open flow N<sub>2</sub> cooling device.<sup>1</sup> Data were collected at 100 K using monochromated Cu K<sub>α</sub> or Mo K<sub>α</sub> radiation (λ = 1.5418/0.71073 Å). Data processing was done with SHELXs/XL and refined by least squares on weighted *F*<sub>2</sub> values for all reflections, disordering of fragments was done with the help of the implemented DSR tool.<sup>2</sup> Graphical representations have been prepared using Olex2-1.2. Finalisation of gathered data was done using final cif tool.<sup>3</sup>

**NMR spectroscopy.** NMR samples were prepared inside an inert atmosphere glovebox in either flame sealable NMR tubes or NMR tubes equipped with a gas-tight J.Young valve.  $^1\text{H}$ ,  $^{13}\text{C}$ ,  $^{19}\text{F}$ ,  $^{27}\text{Al}$ ,  $^{31}\text{P}$ ,  $^{115}\text{In}$ -NMR spectra were acquired either on a Bruker Biospin Avance II+ 400 MHz WB, a Bruker Avance 200 MHz or a Bruker Avance III HD 300 MHz spectrometer.  $^1\text{H}$  and  $^{13}\text{C}$  NMR spectra are reported relative to TMS and were calibrated to residual solvent resonances.<sup>4</sup> Data analysis was performed using Bruker TOPSPIN 3.5 software. The broad resonance at  $\delta = 70$  ppm observed in  $^{27}\text{Al}$ -NMR spectra corresponds to a background from Al-nuclei in the probe head.

**Quantum Chemical Calculations.** All quantum chemical calculations were carried out with the TURBOMOLE program package using BP86 functionals with def-SV(P) basis sets and D3(BJ) dispersion correction.<sup>5</sup> Vibrational frequencies were calculated using the AOFORCE-module.<sup>6</sup> All calculated structures were checked for consistency in terms of geometric conversion, sensible electron occupations and the absence of imaginary vibrational frequencies. Thermal contributions to the enthalpy and free energy of the systems were calculated with the FREEH application based on the analysis of the vibrations obtained by BP86/def2-def-SV(P)/D3(BJ) calculations. Charge analysis was done by NPA<sup>7</sup>, PABOON<sup>8</sup> and AIM<sup>9</sup> analysis on wfn files generated with TURBOMOLE using the program Multiwfn 3.6.<sup>10</sup> Solvation effects were computed using the COSMO module with set dielectricity constants of 8.93 ( $\text{CH}_2\text{Cl}_2$ ) and 13.38 ( $1,2\text{-C}_6\text{H}_4\text{F}_2$ ).<sup>11</sup>

### S-1.1 Oxidation of Mg with $[\text{HMB}][\text{Al}(\text{OR}^{\text{F}})_4]$

#### S-1.1.1 Mg turnings

Magnesium turnings (0.032 g, 1.30 mmol, 6 eq.) were flame heated under reduced pressure and stirred for 12 h under an Argon atmosphere.  $\text{Ag}[\text{Al}(\text{OR}^{\text{F}})_4]$  (0.116 g, 0.108 mmol) and  $\text{C}_6\text{Me}_6$  (0.035 g, 0.215 mmol, 2 eq.) were dissolved in *o*-DFB (4 ml). Iodine (0.014 g, 0.054 mmol, 0.5 eq.) was added under positive argon flow to the stirred reaction mixture. Within five minutes the solution developed a dark intensive brown-red colour, accompanied by formation of a yellow precipitate. The reaction mixture was stirred for 2 h at ambient temperature, and the supernatant filtered away from formed AgI onto the activated Magnesium turnings and stirred for 5 d at ambient temperature. The deep red colour of the reaction mixture was slightly lightened during this period. Dark red crystals suitable for scXRD experiments were grown by layering of the filtered reaction mixture with *n*-pentane (8 ml). And revealed the structure of 6,7-difluoro-1,2,3,4-tetramethylantracenyl tetrafluorotertbutoxyaluminate already described in the literature.<sup>12</sup>

#### S-1.1.2 Rieke Magnesium $\text{Mg}^*$

Preparation of Rieke Magnesium:

To ensure highest possible activity of employed Magnesium  $\text{MgCl}_2$  (0.108 g, 1.14 mmol) was suspended in THF (6 ml) and reduced with a solution of Lithium Naphthalenide in THF (1 M, 2 ml, 2 mmol, 1.8 eq.). The reaction mixture was stirred for 12 h at ambient temperature during which decolourisation and precipitation of dark grey precipitate was observed. Supernatant solution was filtered, the precipitate washed with THF (3 x 8 ml) and dried under vacuum.

$\text{Ag}[\text{Al}(\text{OR}^f)_4]$  (0.243 g, 0.226 mmol) and  $\text{C}_6\text{Me}_6$  (0.078 g, 0.453 mmol, 2 eq.) were dissolved in *o*-DFB (5 ml). Iodine (0.029 g, 0.113 mmol, 0.5 eq.) was added under positive argon flow to the stirred reaction mixture. Within five minutes the solution developed a dark intensive brown-red colour, accompanied by formation of a yellow precipitate. The reaction mixture was stirred for 2 h at ambient temperature and the supernatant filtered away from formed AgI onto the freshly prepared Rieke Magnesium and stirred for 5 d at ambient temperature. The deep red colour of the reaction mixture was slightly lightened during this period. An aliquot (2 ml) of the reaction mixture was again layered with *n*-pentane to yield crystals of 6,7-difluoro-1,2,3,4-tetramethylantracenyli tetrafluorotertbutoxyaluminate described above. The rest of the reaction mixture was spiked with two drops of MeCN with immediate Colour loss upon addition. The reaction mixture was filtered. Crystals suitable for scXRD analysis were grown from concentrated solution at  $-25^\circ\text{C}$  to reveal hexacoordinate  $[\text{Mg}(\text{MeCN})_6][\text{Al}(\text{OR}^f)_2]_2$  **1**.

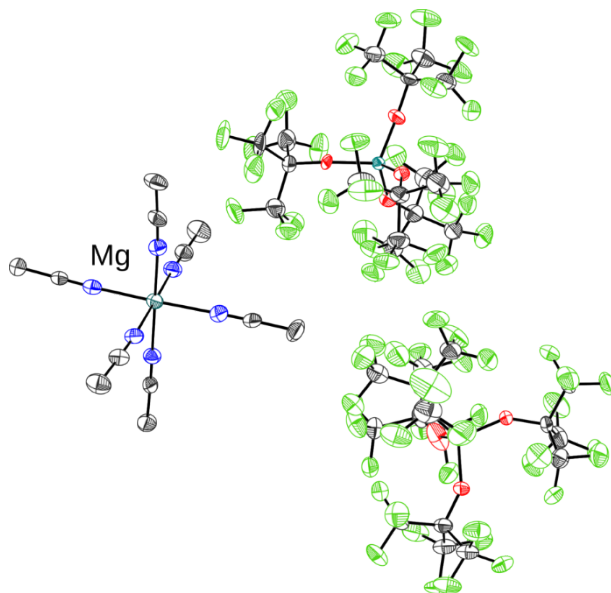

Figure S- 1 Molecular structure of  $[\text{Mg}(\text{MeCN})_6][\text{Al}(\text{OR}^f)_4]_2$ . Thermal displacement ellipsoids drawn at 50 % probability. Hydrogen atoms were omitted for clarity.

### S-1.2 Synthesis of $[\text{Ca}(\text{HMB})(\text{oDFB})_2\{f\text{-}a\}][\text{Al}(\text{OR}^f)_4]$ **2**

$\text{Ag}[\text{Al}(\text{OR}^f)_4]$  (0.226 g, 0.210 mmol) and  $\text{C}_6\text{Me}_6$  (0.034 g, 0.210 mmol, 1 eq.) were dissolved in *o*-DFB (3 ml). Iodine (0.027 g, 0.105 mmol, 0.5 eq.) was added under positive argon flow to the stirred

reaction mixture. Within five minutes the solution developed a dark intensive brown-red colour, accompanied by formation of a yellow precipitate. The reaction mixture was stirred for 2 h at ambient temperature and the supernatant filtered away from formed AgI onto Calcium clippings (0.051 g, 4.21 mmol, 7 eq.) and stirred for 9 d at ambient temperature. The yellow reaction mixture was filtered and layered with n-pentane to yield the title compound as colourless crystals (0.079 g, 0.037 mmol, crystalline yield calculated for **2**: 35 %).

### S-1.3 Synthesis of [HMB][*al-f-al*]

Ag[*al-f-al*] (0.217 g, 0.119 mmol) and C<sub>6</sub>Me<sub>6</sub> (0.019 g, 0.118 mmol, 0.99 eq.) were dissolved in *o*-DFB (3 ml). Iodine (0.015 g, 0.059 mmol, 0.5 eq.) was added under positive argon flow to the stirred reaction mixture. Within five minutes the solution developed a dark intensive brown-red colour, accompanied by formation of a yellow precipitate. The reaction mixture was stirred for 2 h at ambient temperature and the supernatant filtered into an J.Youngs tap NMR tube and NMR spectra collected of the fresh sample and after three and six days. No major change in composition of the sample was detectable. Quantity of [F-Al(OR<sup>F</sup>)<sub>3</sub>] remained at below 2% compared to [μF-{Al(OR<sup>F</sup>)<sub>3</sub>}<sub>2</sub>].

<sup>1</sup>H-NMR (200.12 MHz, 1,2-C<sub>6</sub>H<sub>4</sub>F<sub>2</sub>, 298 K) δ = 2.19 (br. s, ω<sub>1/2</sub> = 118 Hz ) ppm. comp. **1b**-H<sup>+</sup> δ = 9.57 (s, 1H, 10-CH), 7.94 (m, 1H, 5-CH), 7.65 (m, 1H, 8-CH), 4.46 (s, 2H, 9-CH<sub>2</sub>), 2.71 (s, 3H, 14-CH<sub>3</sub>), 2.45 (s, 3H, 12-CH<sub>3</sub>), 2.35 (s, 3H, 11-CH<sub>3</sub>), 2.27 (s, 3H, 13-CH<sub>3</sub>) ppm. comp. [C<sub>6</sub>Me<sub>7</sub>]<sup>+</sup> δ = 2.60 (s, 3H, *p*-CH<sub>3</sub>), 2.48 (s, 6H, *o*-CH<sub>3</sub>), 2.12 (s, 6H, *m*-CH<sub>3</sub>), 1.41 (s, 6H, *ipso*-CH<sub>3</sub>) ppm. unknown arene δ = 3.71 (s, -CH<sub>2</sub>) ppm.  
<sup>19</sup>F-NMR (188.31 MHz, 1,2-C<sub>6</sub>F<sub>2</sub>H<sub>4</sub>, 298 K) δ = -75.1 (br. s, F-[Al(OR<sup>F</sup>)<sub>3</sub>], >2% compared to [μF-{Al(OC(CF<sub>3</sub>)<sub>3</sub>)<sub>3</sub>}<sub>2</sub>]), -75.5 (s, 54 F, [μF-{Al(OC(CF<sub>3</sub>)<sub>3</sub>)<sub>3</sub>}<sub>2</sub>]), -76.0 (s), -76.2 (s), -184.5 (br s, 1 F, [μF-{Al(OC(CF<sub>3</sub>)<sub>3</sub>)<sub>3</sub>}<sub>2</sub>]) ppm.

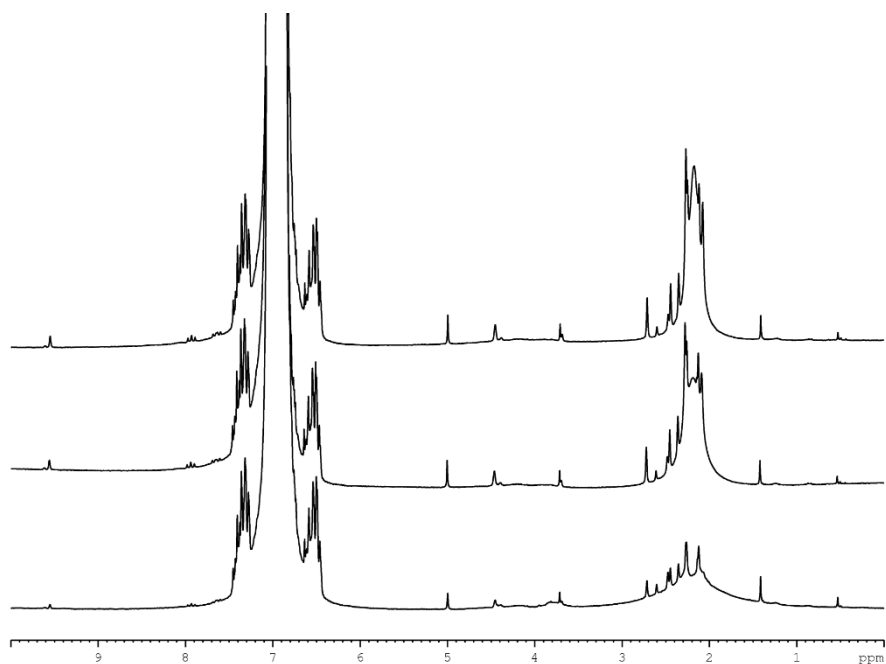

Figure S- 2: Stacked  $^1\text{H-NMR}$  (200.12 MHz,  $1,2\text{-C}_6\text{H}_4\text{F}_2$ , 298 K) spectra of freshly prepared solution of  $[\text{HMB}][\text{al-f-al}]$  (bottom trace). Recollected after three (middle trace) and six (top trace) days.

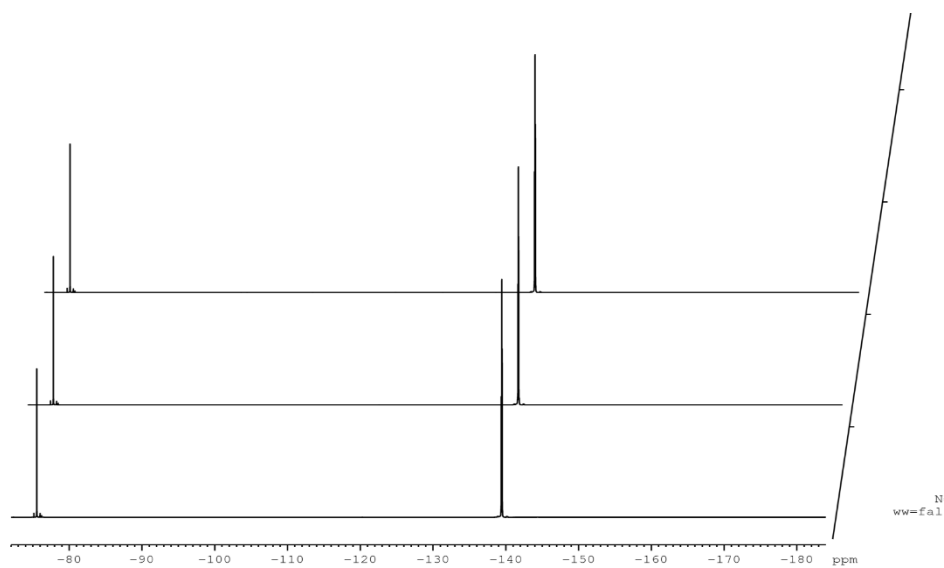

Figure S- 3 Stacked  $^{19}\text{F-NMR}$  (188.31 MHz,  $1,2\text{-C}_6\text{H}_4\text{F}_2$ , 298 K) spectra of freshly prepared solution of  $[\text{HMB}][\text{al-f-al}]$  (bottom trace). Recollected after three (middle trace) and six (top trace) days.

#### S-1.4 Synthesis of $[\text{In}(\text{HMB})][\text{al-f-al}]$

$\text{Ag}[\text{al-f-al}]$  (0.352 g, 0.193 mmol) and  $\text{C}_6\text{Me}_6$  (0.029 g, 0.1757 mmol, 0.90 eq.) were dissolved in *o*-DFB (3 ml). Iodine (0.019 g, 0.0737 mmol, 0.42 eq.) was added under positive argon flow to the stirred reaction mixture. Within five minutes the solution developed a dark intensive brown-red colour, accompanied by formation of a yellow precipitate. The reaction mixture was stirred for 2 h at ambient temperature and the supernatant filtered onto thinly sheeted Indium metal (0.040 g, 0.351 mmol, 2 eq.) and stirred for 12 h at ambient temperature. After 30 min lightening of the dark red color of the

reaction mixture was observed with complete colour change to light yellow after 12 h. The reaction mixture was filtered and layered with n-pentane to yield the title compound in form of yellowish needles (0.220 g, 0.193 mmol, 64% crystalline yield).

$^1\text{H-NMR}$  (300.18 MHz, 1,2- $\text{C}_6\text{H}_4\text{F}_2$ , 298 K)  $\delta$  = 2.45 (s, 18 H,  $[\text{In}(\text{C}_6(\text{CH}_3)_6]^+)$  ppm.  $^{13}\text{C-NMR}$  (100.62 MHz, 1,2- $\text{C}_6\text{F}_2\text{H}_4$ , 298 K)  $\delta$  = 15.8 (s,  $[\text{In}(\text{C}_6(\text{CH}_3)_6]^+)$ , 137.8 ppm (s,  $[\text{In}(\text{C}_6(\text{CH}_3)_6]^+)$ ).  $^{19}\text{F-NMR}$  (282.45 MHz, 1,2- $\text{C}_6\text{F}_2\text{H}_4$ , 298 K)  $\delta$  = -75.5 (s, 54 F,  $[\mu\text{F}-\{\text{Al}(\text{OC}(\text{CF}_3)_3)_3\}_2]$ ), -184.5 (br s, 1 F,  $[\mu\text{F}-\{\text{Al}(\text{OC}(\text{CF}_3)_3)_3\}_2]$ ) ppm.  $^{27}\text{Al-NMR}$  (78.22 MHz, 1,2- $\text{C}_6\text{F}_2\text{H}_4$ , 298 K)  $\delta$  = 39.8 ppm (s,  $[\mu\text{F}-\{\text{Al}(\text{OC}(\text{CF}_3)_3)_3\}_2]^-$ ).  $^{115}\text{In-NMR}$  (65.77 MHz, 1,2- $\text{C}_6\text{F}_2\text{H}_4$ , 298 K)  $\delta$  = -1296.2 ppm (s,  $[\text{In}(\text{C}_6\text{Me}_6)]$ ).

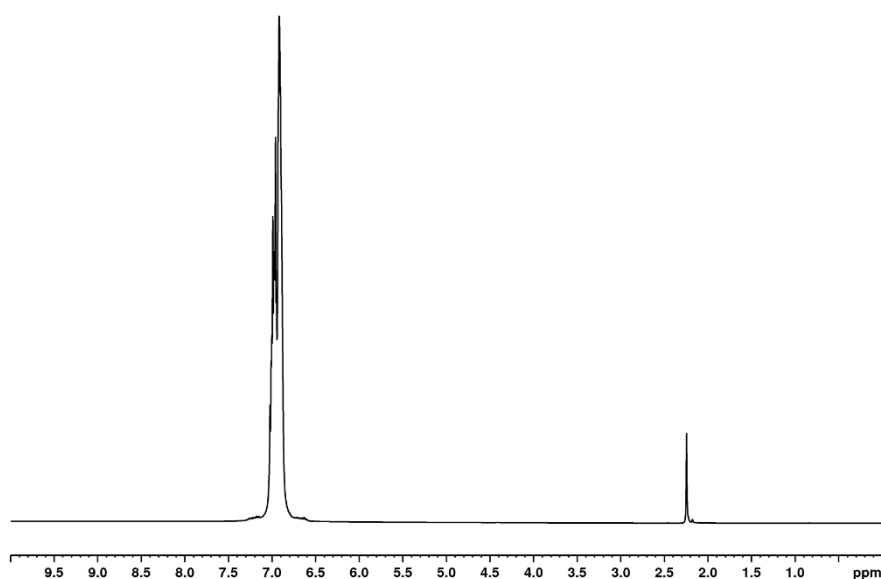

Figure S- 4  $^1\text{H-NMR}$  (300.18 MHz, 1,2- $\text{C}_6\text{F}_2\text{H}_4$ , 298 K) of  $[\text{In}(\text{HMB})][\text{al-f-al}]$ .

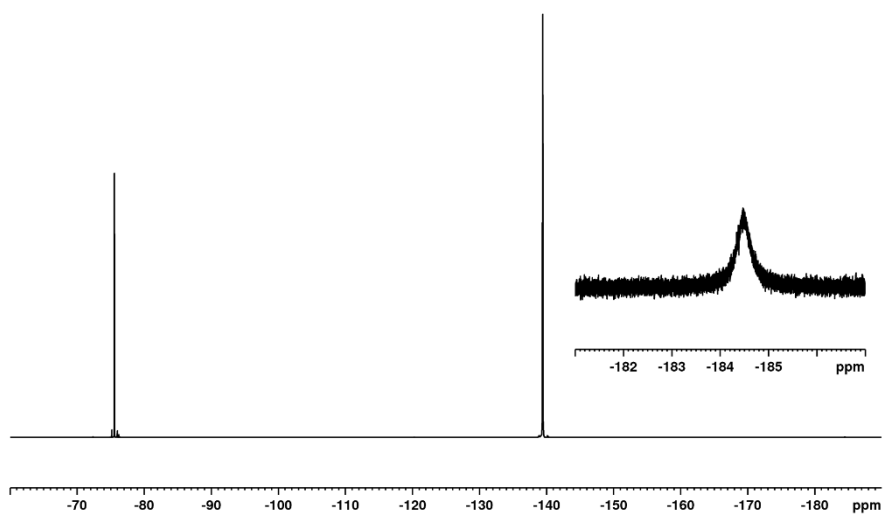

Figure S- 5  $^{19}\text{F}$ -NMR (282.45 MHz,  $1,2\text{-C}_6\text{F}_2\text{H}_4$ , 298 K) of  $[\text{In}(\text{HMB})][\text{al-f-al}]$ .

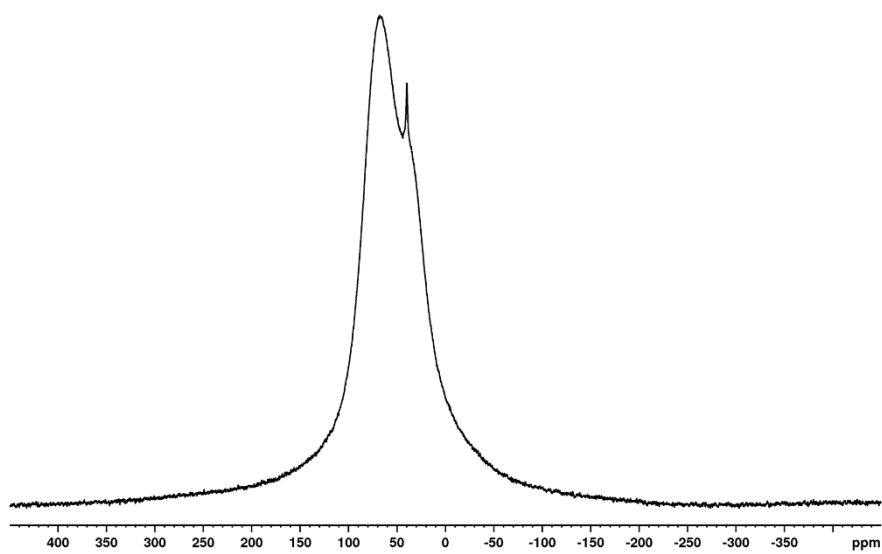

Figure S- 6  $^{27}\text{Al}$ -NMR (78.22 MHz,  $1,2\text{-C}_6\text{F}_2\text{H}_4$ , 298 K) of  $[\text{In}(\text{HMB})][\text{al-f-al}]$ .



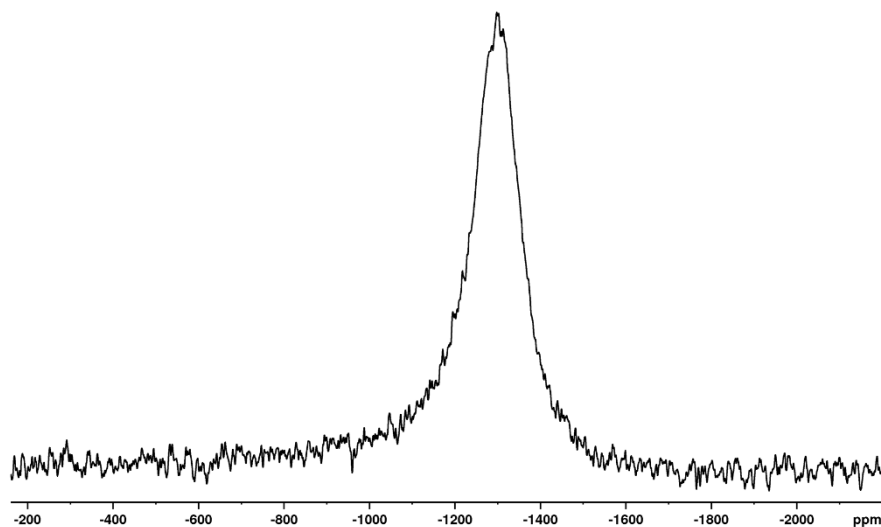

Figure S- 7  $^{115}\text{In}$ -NMR (65.77 MHz,  $1,2\text{-C}_6\text{F}_2\text{H}_4$ , 298 K) of  $[\text{In}(\text{HMB})][\text{al-f-al}]$ .

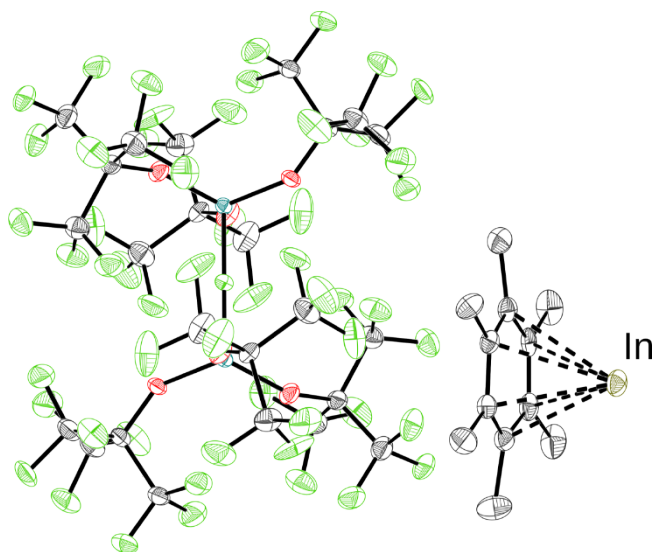

Figure S- 8 Molecular structure of  $[\text{In}(\text{HMB})][\text{al-f-al}]$ . Thermal displacement ellipsoids drawn at 50 % probability. Hydrogen atoms were omitted for clarity.

### S-1.5 Synthesis of $[\text{Ca}(\text{HMB})(\text{oDFB})_2\{\text{f-al}\}][\text{al-f-al}]$ **3**

Ca clippings (70 mg, 1.747 mmol) were dissolved in  $\text{NH}_3$  (4 ml) at  $-78^\circ\text{C}$  under formation of a deep blue solution and stirred for 1 h at this temperature.  $\text{NH}_3$  was slowly evaporated by moderate temperature increase with a positive flow of Argon to result in a bronze coloured metal powder. Residual  $\text{NH}_3$  was removed under reduced pressure at  $80^\circ\text{C}$  to yield a dark grey metal powder. To test reactivity of the obtained Ca dust a few grains of the powdered metal were brought in contact with a droplet of water to result in an intense white flame.

Ag[*al-f-al*] (0.309 g, 0.170 mmol) and C<sub>6</sub>Me<sub>6</sub> (0.027 g, 0.169 mmol, 0.99 eq.) were dissolved in *o*-DFB (3 ml). Iodine (0.021 g, 0.084 mmol, 0.49 eq.) was added under positive argon flow to the stirred reaction mixture. Within five minutes the solution developed a dark intensive brown-red colour, accompanied by formation of a yellow precipitate. The reaction mixture was stirred for 2 h at ambient temperature and the supernatant filtered onto the activated Calcium powder and stirred for 10 d at ambient temperature. After 12 h lightening of the dark red color of the reaction mixture was observed but even after 10 d a faint red colour was observable. The reaction mixture was filtered and layered with *n*-pentane to yield the title compound as colourless crystals (0.175 g, 0.066 mmol, 77% crystalline yield).

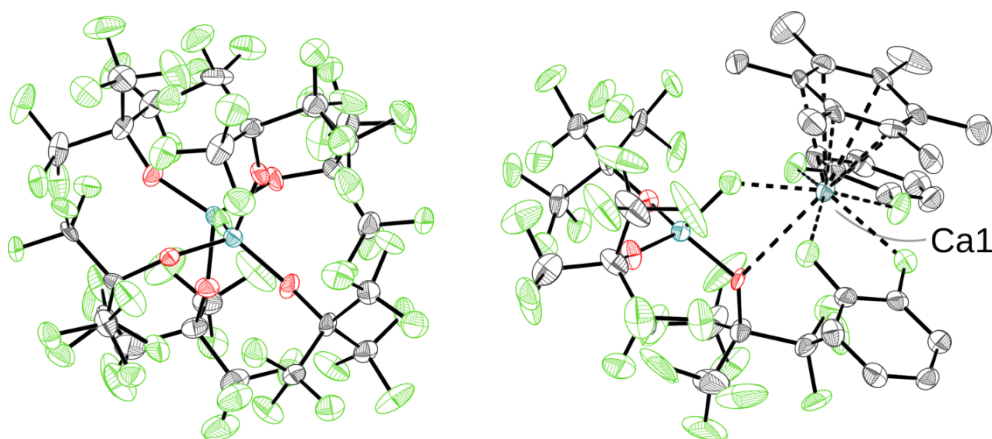

Figure S-9 Molecular structure of [Ca(HMB)(*o*DFB)<sub>2</sub>{*f-al*}][*al-f-al*] **3**. Thermal displacement ellipsoids drawn at 50 % probability. Hydrogen atoms were omitted for clarity.

### S-1.6 Synthesis of [Ca(HMB)(*o*DFB)<sub>2</sub>{*f-al*}][*al-f-al*] **3** and serendipitous finding of [Ca(HMB)(*o*DFB)<sub>4</sub>][*al-f-al*] **7**

Ag[*al-f-al*] (0.309 g, 0.170 mmol) and C<sub>6</sub>Me<sub>6</sub> (0.027 g, 0.169 mmol, 0.99 eq.) were dissolved in *o*-DFB (3 ml). Iodine (0.021 g, 0.084 mmol, 0.49 eq.) was added under positive argon flow to the stirred reaction mixture. Within five minutes the solution developed a dark intensive brown-red colour, accompanied by formation of a yellow precipitate. The reaction mixture was stirred for 2 h at ambient temperature and the supernatant filtered onto Calcium clippings (0.040 g, 1.004 mmol, 7 eq.) and stirred for 10 d at ambient temperature. After 12 h lightening of the dark red color of the reaction mixture was observed but even after 10 d a faint red colour was observable. The reaction mixture was filtered and layered with *n*-pentane and left to crystallize at -10°C to yield the title compound **3** as colourless needles together with minor product **7** in form of yellowish blocks (0.150 g, 0.056 mmol, 77% crystalline yield calculated with respect to **3**).

<sup>1</sup>H-NMR (400.17 MHz, 1,2-C<sub>6</sub>H<sub>4</sub>F<sub>2</sub>, 298 K) δ = 2.15 (s, 18 H, (C<sub>6</sub>(CH<sub>3</sub>)<sub>6</sub>) ppm. <sup>13</sup>C-NMR (100.62 MHz, 1,2-C<sub>6</sub>F<sub>2</sub>H<sub>4</sub>, 298 K) δ = 15.6 (s, (C<sub>6</sub>(CH<sub>3</sub>)<sub>6</sub>)), 133.3 ppm (s, (C<sub>6</sub>(CH<sub>3</sub>)<sub>6</sub>)). <sup>19</sup>F-NMR (376.54 MHz, 1,2-C<sub>6</sub>F<sub>2</sub>H<sub>4</sub>,

298 K)  $\delta = -75.5$  (s, 54 F,  $[\mu\text{F}-\{\text{Al}(\text{OC}(\text{CF}_3)_3)_2\}]$ ),  $-75.9$  (s),  $-76.0$  (s, 27 F,  $[\text{F}-\text{Al}(\text{O}(\text{C}(\text{CF}_3)_3)_3]^-$ ), ratio  $[\mu\text{F}-\{\text{Al}(\text{OC}(\text{CF}_3)_3)_2\}] : [\text{F}-\text{Al}(\text{O}(\text{C}(\text{CF}_3)_3)_3]^-$ ; 2.15 : 1),  $-76.1$  (s),  $-151.5$  (s, 1 F,  $[\text{F}-\text{Al}(\text{O}(\text{C}(\text{CF}_3)_3)_3]^-$ ),  $-184.5$  (br s, 1 F,  $[\mu\text{F}-\{\text{Al}(\text{OC}(\text{CF}_3)_3)_2\}]$ ) ppm.  $^{27}\text{Al}$ -NMR (104.27 MHz, 1,2- $\text{C}_6\text{F}_2\text{H}_4$ , 298 K)  $\delta = 39.0$  ppm (shoulder,  $[\mu\text{F}-\{\text{Al}(\text{OC}(\text{CF}_3)_3)_2\}]^-$ ). IR (64 scans, ZnSe ATR, corrected):  $\tilde{\nu}/\text{cm}^{-1}$  (intensity) = 3661 (vww), 1599 (vww), 1496 (vww), 1354 (vw), 1300 (mw), 1242 (vvs), 1212 (vvs), 1176 (ms), 1088 (vww), 971 (vvs), 861 (vw), 828 (vww), 753 (vw), 726 (vvs), 637 (vw), 568 (vw).

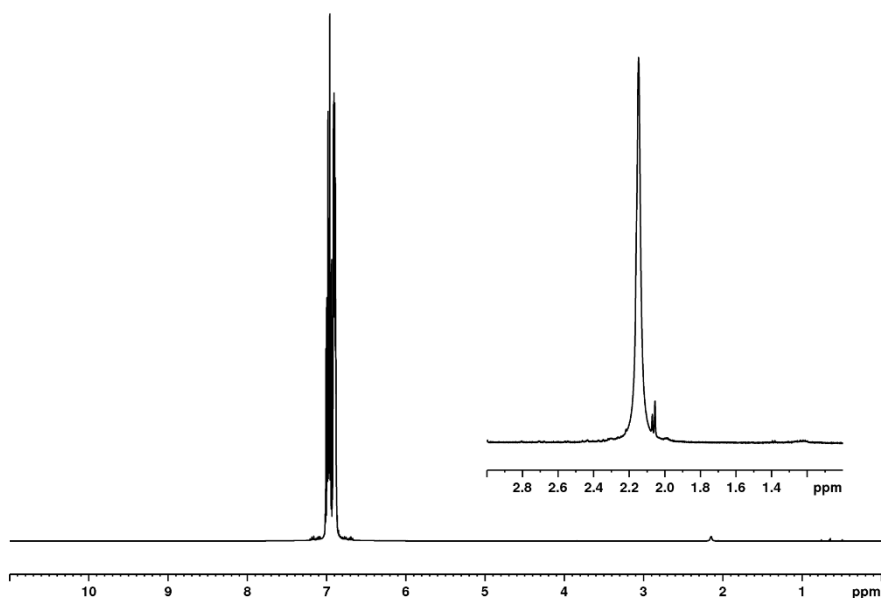

Figure S- 10  $^1\text{H}$ -NMR (400.17 MHz, 1,2- $\text{C}_6\text{F}_2\text{H}_4$ , 298 K) of isolated crystals containing  $[\text{Ca}(\text{HMB})(\text{oDFB})_2\{\text{f-al}\}][\text{al-f-al}]$ .

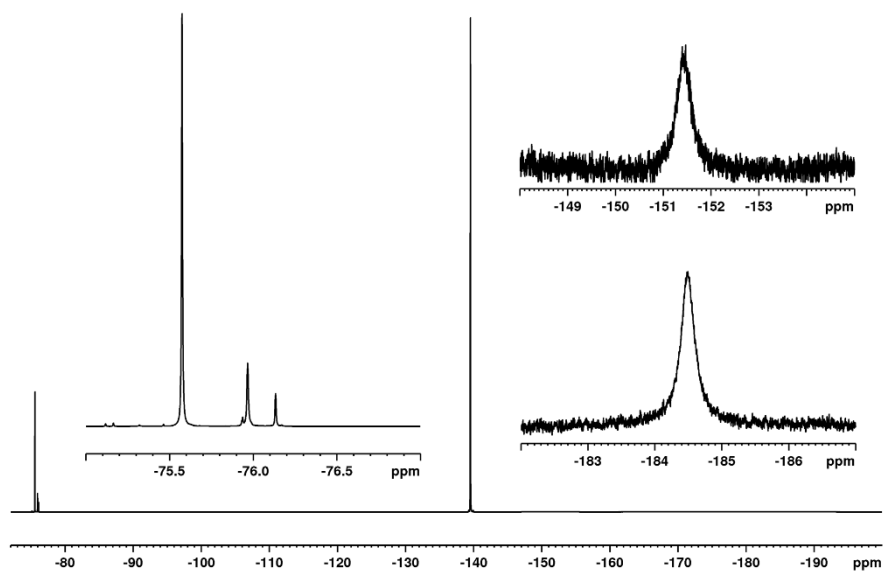

Figure S- 11  $^{19}\text{F}$ -NMR (376.54 MHz,  $1,2\text{-C}_6\text{F}_2\text{H}_4$ , 298 K) of isolated crystals containing  $[\text{Ca}(\text{HMB})(\text{oDFB})_2\{\text{f-al}\}][\text{al-f-al}]$

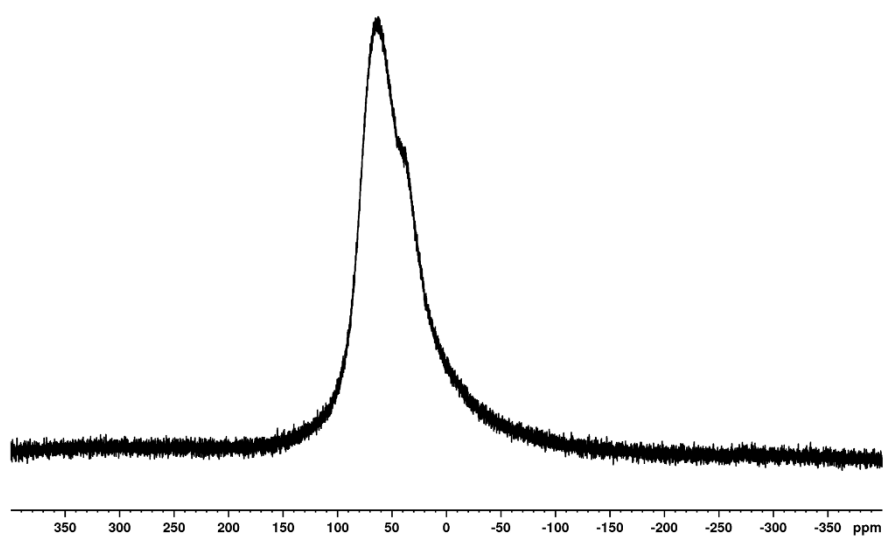

Figure S- 12  $^{27}\text{Al}$ -NMR (104.27 MHz,  $1,2\text{-C}_6\text{F}_2\text{H}_4$ , 298 K) of isolated crystals containing  $[\text{Ca}(\text{HMB})(\text{oDFB})_2\{\text{f-al}\}][\text{al-f-al}]$

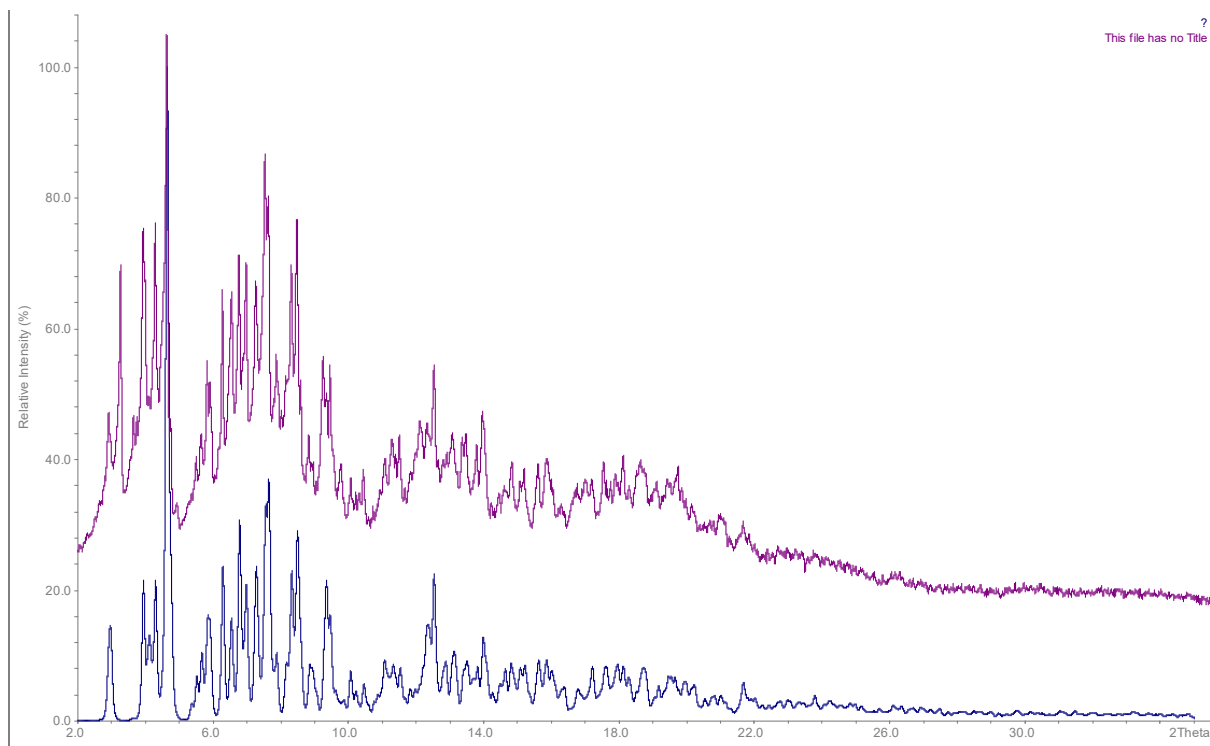

Figure S- 13 Powder diffractogram of bulk material containing  $[Ca(HMB)(oDFB)_2\{f-al\}][al-f-al]$  at 100(10) K. (purple trace) simulated diffractogram of the single-crystal X-ray analysis (blue trace), measured at 100(2) K.

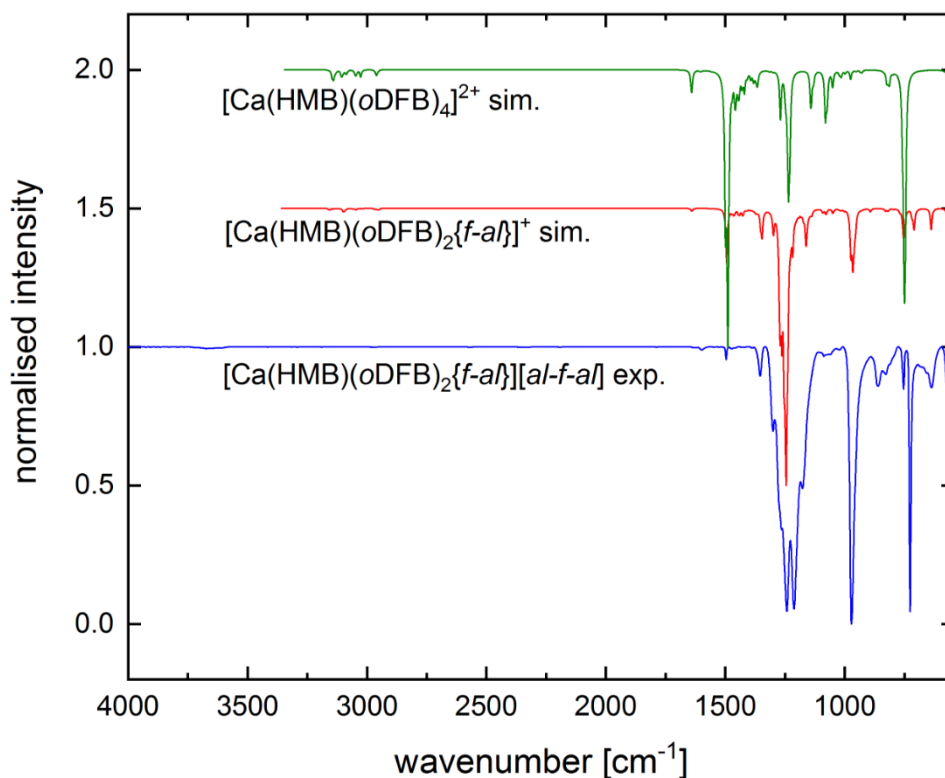

Figure S- 14 Experimental IR data on bulk material containing  $[\text{Ca}(\text{HMB})(\text{oDFB})_2\{\text{f-al}\}][\text{al-f-al}]$  **3** (blue). Simulated IR data on  $[\text{Ca}(\text{HMB})(\text{oDFB})_4]^{2+}$  (green) &  $[\text{Ca}(\text{HMB})(\text{oDFB})_2\{\text{f-al}\}]^+$  (red) (BP86/def2-def-SV(P)/D3(BJ)). IR (ZnSe ATR-corrected, 64 scans).

### S-1.7 Synthesis of $[\text{Ba}(\text{HMB})(\text{oDFB})_3\{\text{f-al}\}][\text{al-f-al}]$ **4**

$\text{Ag}[\text{al-f-al}]$  (0.430 g, 0.236 mmol) and  $\text{C}_6\text{Me}_6$  (0.038 g, 0.234 mmol, 0.99 eq.) were dissolved in *o*-DFB (4 ml). Iodine (0.030 g, 0.117 mmol, 0.49 eq.) was added under positive argon flow to the stirred reaction mixture. Within five minutes the solution developed a dark intensive brown-red colour, accompanied by formation of a yellow precipitate. The reaction mixture was stirred for 2 h at ambient temperature and the supernatant filtered onto Barium clippings (0.065 g, 0.468 mmol, 2 eq.) and stirred for 10 d at ambient temperature. After 12 h lightening of the dark red color of the reaction mixture was observed but even after 10 d a faint red colour was observable. The reaction mixture was filtered and layered with *n*-pentane and left to crystallize at  $-10^\circ\text{C}$  to yield the title compound **4** as colourless crystals (0.280 g, 0.117 mmol, 83 % crystalline yield calc. for **4**).

$^1\text{H-NMR}$  (300.18 MHz,  $1,2\text{-C}_6\text{H}_4\text{F}_2$ , 298 K)  $\delta = 2.17$  (s, 18 H,  $(\text{C}_6(\text{CH}_3)_6)$ ) ppm.  $^{13}\text{C-NMR}$  (75.48 MHz,  $1,2\text{-C}_6\text{F}_2\text{H}_4$ , 298 K)  $\delta = 15.0$  (s,  $(\text{C}_6(\text{CH}_3)_6)$ ), 133.4 ppm (s,  $(\text{C}_6(\text{CH}_3)_6)$ ).  $^{19}\text{F-NMR}$  (282.45 MHz,  $1,2\text{-C}_6\text{F}_2\text{H}_4$ , 298 K)  $\delta = -75.6$  (s, 54 F,  $[\mu\text{F}\text{-}\{\text{Al}(\text{OC}(\text{CF}_3)_3)_2\}]$ ),  $-75.8$  (s, 27 F,  $[\text{F-Al}(\text{O}(\text{C}(\text{CF}_3)_3)_3]^-$ ), ratio  $[\mu\text{F}\text{-}\{\text{Al}(\text{OC}(\text{CF}_3)_3)_2\}] : [\text{F-Al}(\text{O}(\text{C}(\text{CF}_3)_3)_3]^-$ ; 2.15 : 1),  $-76.1$  (s),  $-130.3$  (br. s, 1 F,  $[\text{F-Al}(\text{O}(\text{C}(\text{CF}_3)_3)_3]^-$ ),  $-184.5$  (br. s, 1 F,  $[\mu\text{F}\text{-}\{\text{Al}(\text{OC}(\text{CF}_3)_3)_2\}]$ ) ppm.  $^{27}\text{Al-NMR}$  (78.22 MHz,  $1,2\text{-C}_6\text{F}_2\text{H}_4$ , 298 K)  $\delta = 39.7$  ppm (br.s,  $[\text{F-Al}(\text{O}(\text{C}(\text{CF}_3)_3)_3]^-$ ).

$\text{Al}(\text{O}(\text{C}(\text{CF}_3)_3)_3)^-$  &  $[\mu\text{F}-\{\text{Al}(\text{OC}(\text{CF}_3)_3)_3\}_2]^-$ . IR (128 scans, ZnSe ATR, corrected):  $\tilde{\nu}/\text{cm}^{-1}$  (intensity) = 3698 (vww) 3610 (vww) 1500 (vw) 1353 (vw) 1299 (mw) 1242 (vvs) 1213 (vvs) 1176 (s) 1093 (vww) 1062 (vww) 1021 (vww) 969 (vvs) 861 (vw) 842 (vw) 796 (vww) 755 (mw) 725 (vvs) 680 (w) 641 (vw) 564 (vw)

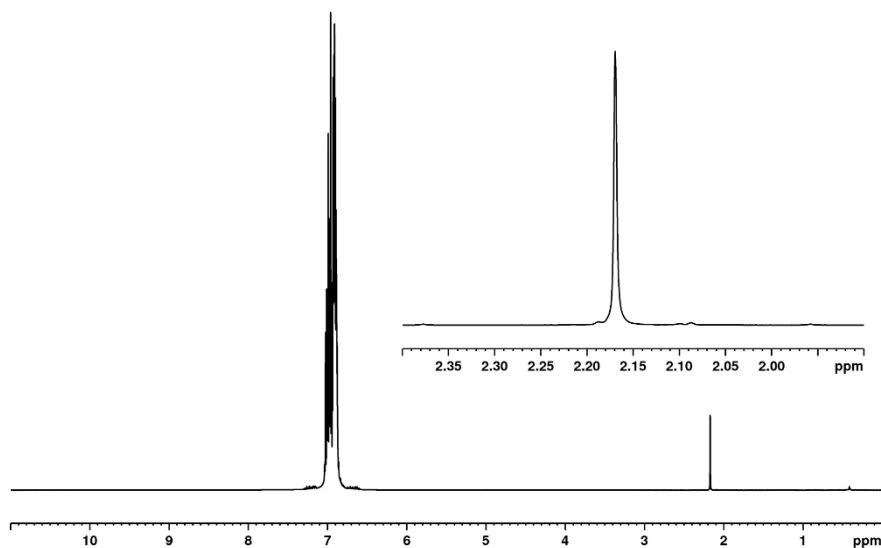

Figure S- 15  $^1\text{H-NMR}$  (300.18 MHz,  $1,2\text{-C}_6\text{F}_2\text{H}_4$ , 298 K) of isolated crystals containing  $[\text{Ba}(\text{HMB})(\text{oDFB})_3\{\text{f-al}\}][\text{al-f-al}]$  **4**.

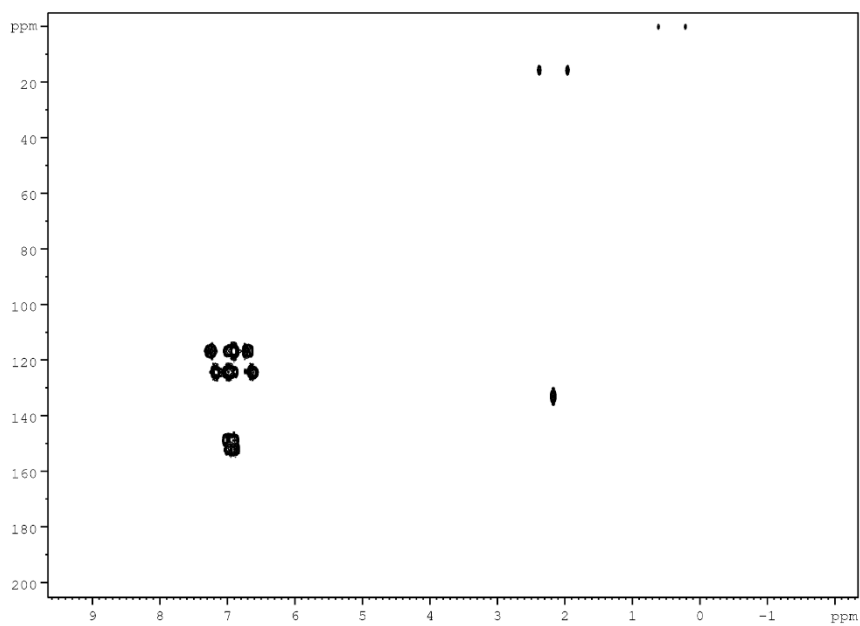

Figure S- 16  $^{16}\text{H}-^{13}\text{C}$  (hmbc)NMR (75.48 MHz,  $1,2\text{-C}_6\text{F}_2\text{H}_4$ , 298 K) of isolated crystals containing  $[\text{Ba}(\text{HMB})(\text{oDFB})_3\{\text{f-al}\}][\text{al-f-al}]$  **4**

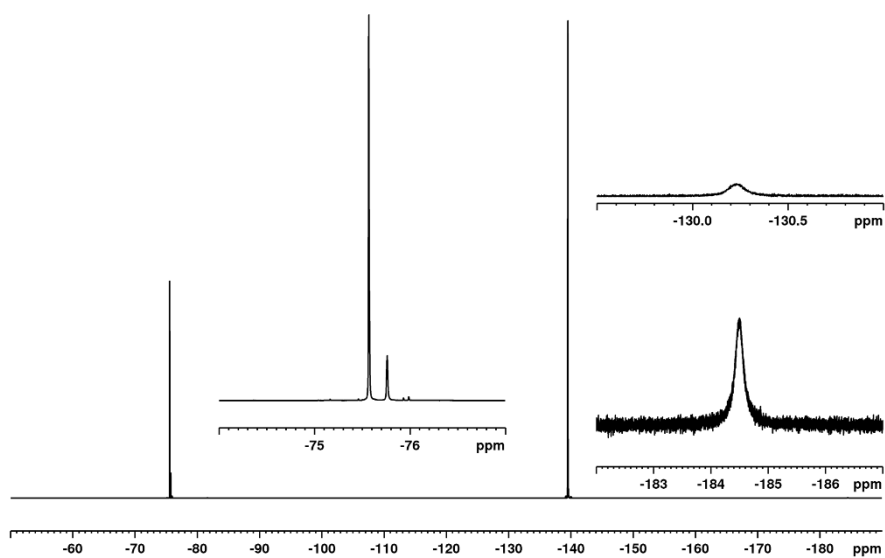

Figure S- 17  $^{19}\text{F}$ -NMR (282.45 MHz,  $1,2\text{-C}_6\text{F}_2\text{H}_4$ , 298 K) of isolated crystals containing  $[\text{Ba}(\text{HMB})(\text{oDFB})_3\{\text{f-al}\}][\text{al-f-al}]$  **4**



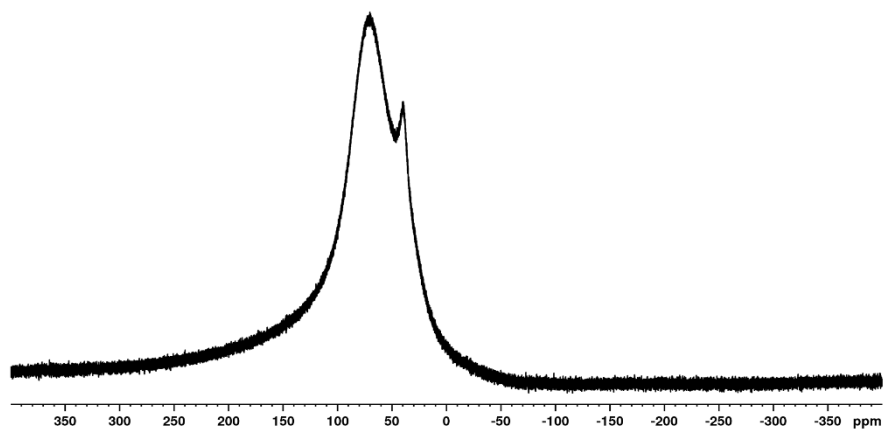

Figure S- 18  $^{27}\text{Al}$ -NMR (78.22 MHz, 1,2- $\text{C}_6\text{F}_2\text{H}_4$ , 298 K) of isolated crystals containing  $[\text{Ba}(\text{HMB})(\text{oDFB})_3\{\text{f-al}\}][\text{al-f-al}]$  **4**

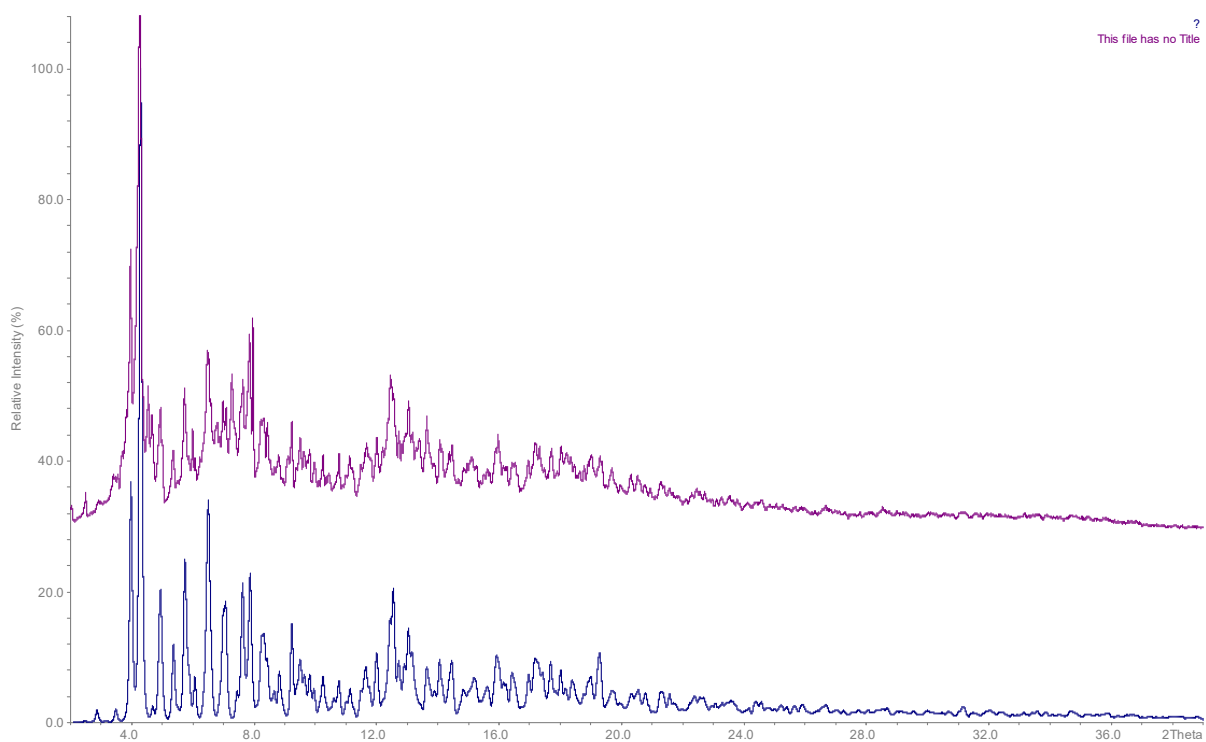

Figure S- 19 Powder diffractogram of bulk material containing  $[\text{Ba}(\text{HMB})(\text{oDFB})_3\{\text{f-al}\}][\text{al-f-al}]$  **4** at 100(10) K. (purple trace) simulated diffractogram of the single-crystal X-ray analysis (blue trace), measured at 100(2) K.

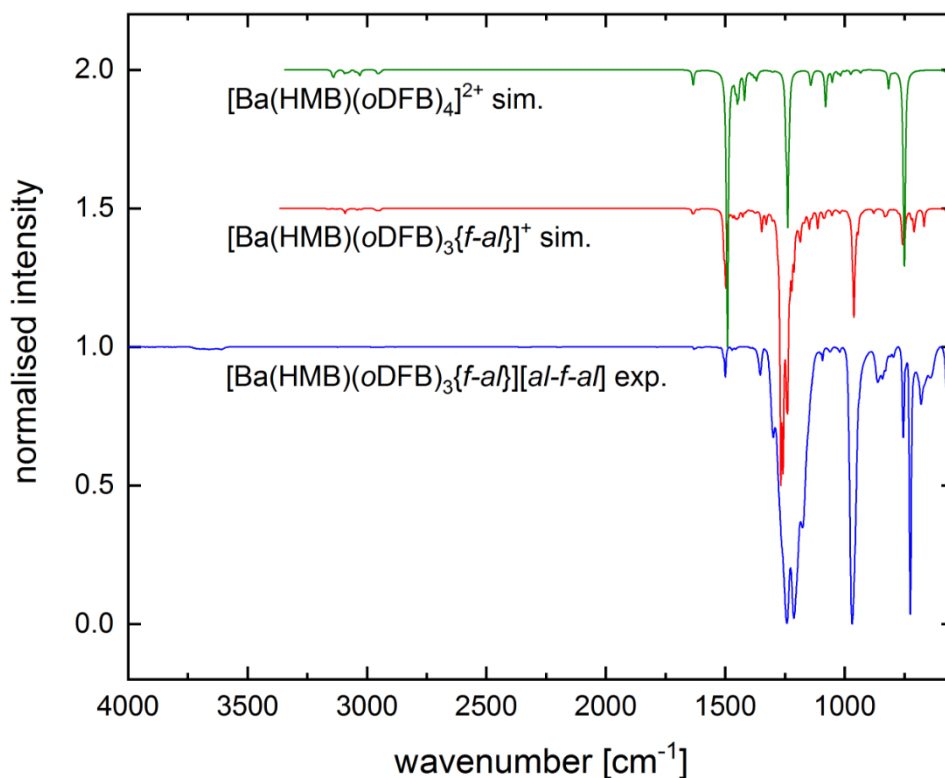

Figure S- 20 Experimental IR data on bulk material containing  $[\text{Ba}(\text{HMB})(\text{oDFB})_3\{\text{f-al}\}][\text{al-f-al}]$  **4** (blue). Simulated IR data on  $[\text{Ba}(\text{HMB})(\text{oDFB})_4]^{2+}$  (green) &  $[\text{Ba}(\text{HMB})(\text{oDFB})_3\{\text{f-al}\}]^+$  (red) (BP86/def2-def-SV(P)/D3(BJ) ). IR (ZnSe ATR-corrected, 128 scans).

### S-1.8 Synthesis of $[\text{Sr}(\text{HMB})(\text{oDFB})_4][\text{al-f-al}]$ **6** and serendipitous finding of $[\text{Sr}(\text{HMB})(\text{oDFB})_3\{\text{f-al}\}][\text{al-f-al}]$ **5**

$\text{Ag}[\text{al-f-al}]$  (0.496 g, 0.272 mmol) and  $\text{C}_6\text{Me}_6$  (0.044 g, 0.270 mmol, 0.99 eq.) were dissolved in *o*-DFB (3 ml). Iodine (0.034 g, 0.135 mmol, 0.49 eq.) was added under positive argon flow to the stirred reaction mixture. Within five minutes the solution developed a dark intensive brown-red colour, accompanied by formation of a yellow precipitate. The reaction mixture was stirred for 2 h at ambient temperature and the supernatant filtered onto Strontium clippings (0.047 g, 0.541 mmol, 2 eq.) and stirred for 8 d at ambient temperature. After 12 h lightening of the dark red color of the reaction mixture was observed. After 4 d only a faint red colour was observable. The reaction mixture was filtered and layered with *n*-pentane and left to crystallize at ambient temperature to yield the title compound **6** as yellowish blocks together with minor product **5** in form of colourless needles (0.374 g, 0.136 mmol, 75 % crystalline yield calculated for **6**).

$^1\text{H-NMR}$  (300.18 MHz, 1,2- $\text{C}_6\text{H}_4\text{F}_2$ , 298 K)  $\delta$  = 2.17 (shoulder), 2.14 (s, 18 H,  $\text{C}_6(\text{CH}_3)_6$ ), 2.09 (s), 2.07 (s) ppm.  $^{13}\text{C-NMR}$  (75.48 MHz, 1,2- $\text{C}_6\text{F}_2\text{H}_4$ , 298 K)  $\delta$  = 15.6 (s,  $\text{C}_6(\text{CH}_3)_6$ ), 133.0 ppm (s,  $\text{C}_6(\text{CH}_3)_6$ ).  $^{19}\text{F-NMR}$

(282.45 MHz, 1,2-C<sub>6</sub>F<sub>2</sub>H<sub>4</sub>, 298 K)  $\delta = -75.6$  (s, 54 F, [ $\mu$ F-{Al(OC(CF<sub>3</sub>)<sub>3</sub>)<sub>3</sub>}<sub>2</sub>]), -75.9 (s), -75.9 (s, 27 F, [F-Al(O(C(CF<sub>3</sub>)<sub>3</sub>)<sub>3</sub>)<sup>-</sup>], ratio [ $\mu$ F-{Al(OC(CF<sub>3</sub>)<sub>3</sub>)<sub>3</sub>}<sub>2</sub>] : [F-Al(O(C(CF<sub>3</sub>)<sub>3</sub>)<sub>3</sub>)<sup>-</sup>]; 1 : 0.07), -184.5 (br. s, 1 F, [ $\mu$ F-{Al(OC(CF<sub>3</sub>)<sub>3</sub>)<sub>3</sub>}<sub>2</sub>]) ppm. <sup>27</sup>Al-NMR (78.22 MHz, 1,2-C<sub>6</sub>F<sub>2</sub>H<sub>4</sub>, 298 K)  $\delta = 39.7$  ppm (shoulder, [ $\mu$ F-{Al(OC(CF<sub>3</sub>)<sub>3</sub>)<sub>3</sub>}<sub>2</sub>]<sup>-</sup>). IR (128 scans, ZnSe ATR, corrected):  $\tilde{\nu}/\text{cm}^{-1}$  (intensity) = 1634 (vww) 1498 (w) 1473 (vww) 1354 (vw) 1300 (mw) 1267 (ms) 1240 (vvs) 1212 (vvs) 1176 (ms) 1091 (vww) 1019 (vww) 972 (vvs) 863 (vw) 841 (vww) 828 (vww) 754 (ms) 726 (vvs) 662 (vw) 634 (vw) 563 (w)

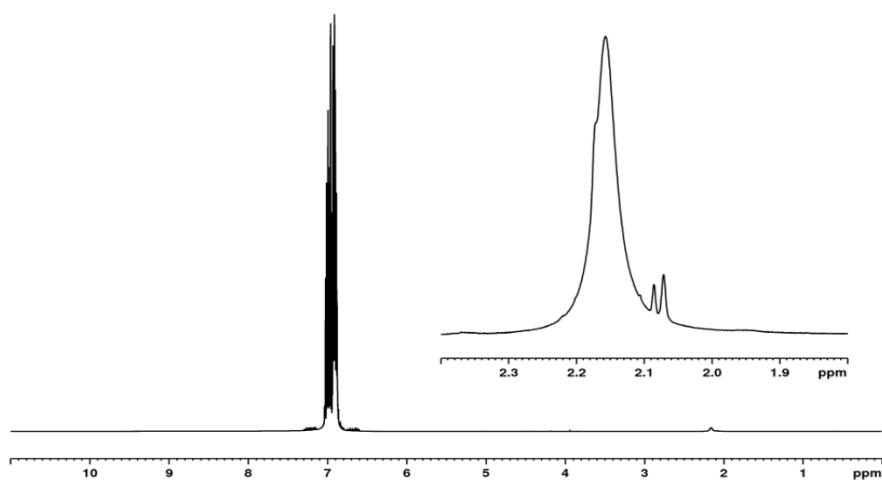

Figure S- 21: <sup>1</sup>H-NMR (300.18 MHz, 1,2-C<sub>6</sub>F<sub>2</sub>H<sub>4</sub>, 298 K) of isolated crystals containing [Sr(HMB)(oDFB)<sub>4</sub>][al-f-al]<sub>2</sub> **6**.

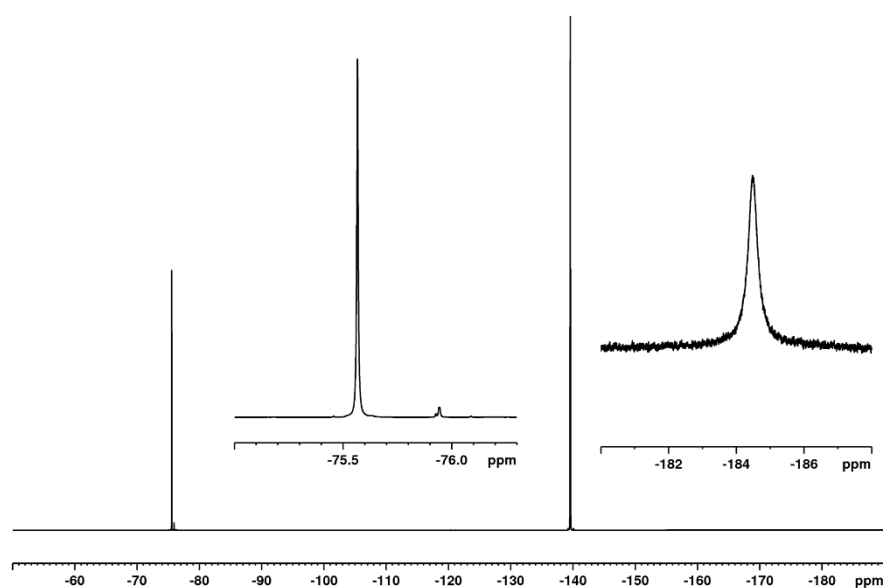

Figure S- 22 <sup>19</sup>F-NMR (282.45 MHz, 1,2-C<sub>6</sub>F<sub>2</sub>H<sub>4</sub>, 298 K) of isolated crystals containing [Sr(HMB)(oDFB)<sub>4</sub>][al-f-al]<sub>2</sub> **6**.

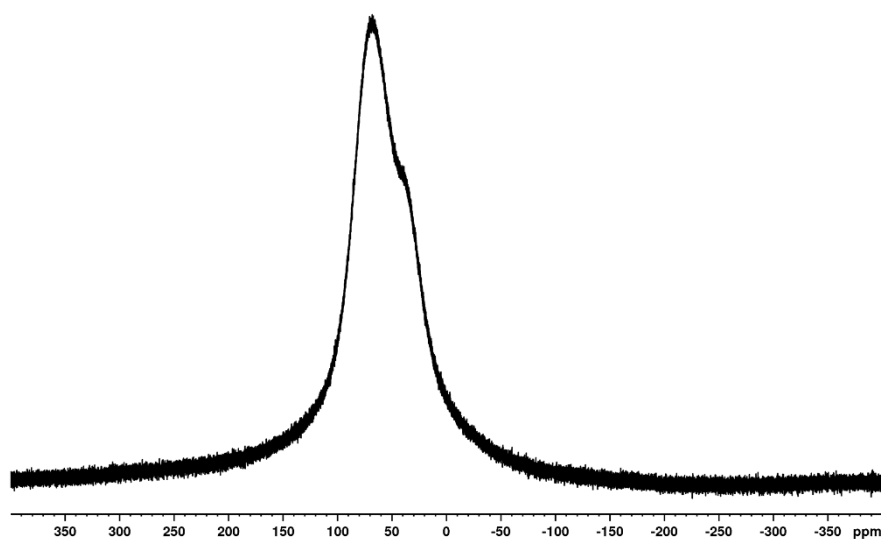

Figure S- 23  $^{27}\text{Al}$ -NMR (78.22 MHz,  $1,2\text{-C}_6\text{F}_2\text{H}_4$ , 298 K) of isolated crystals containing  $[\text{Sr}(\text{HMB})(\text{oDFB})_4][\text{al-f-al}]_2$  **6**.

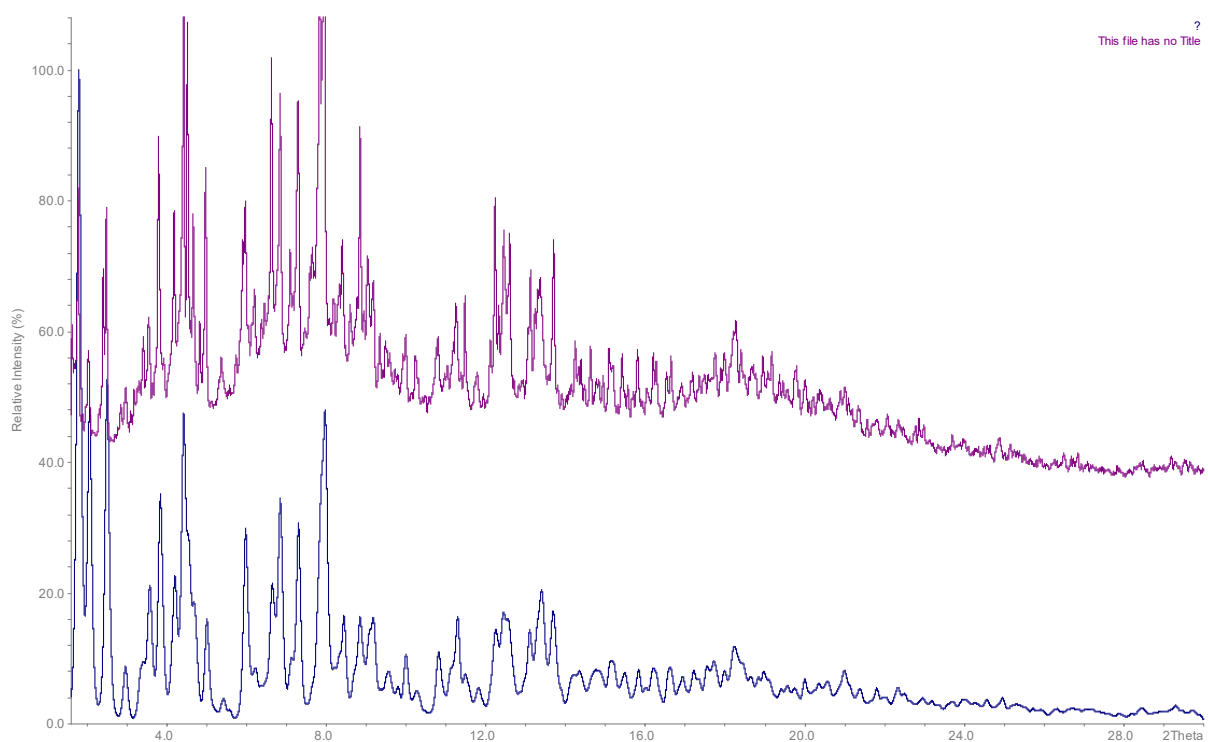

Figure S- 24 Powder diffractogram of bulk material containing  $[\text{Sr}(\text{HMB})(\text{oDFB})_4][\text{al-f-al}]_2$  **6** &  $[\text{Sr}(\text{HMB})(\text{oDFB})_3\{\text{f-al}\}][\text{al-f-al}]$  **5** at 100(10) K. (purple trace) simulated diffractogram of the single-crystal X-ray analysis of **6** (blue trace), measured at 100(2) K. Note that reflex positions are well described by simulation while reflex intensities do not reproduce found experimental pattern, possibly due to heavy disorder oDFB solvent molecules in a solvent channel found in determined single-crystal X-ray analysis of **6**.

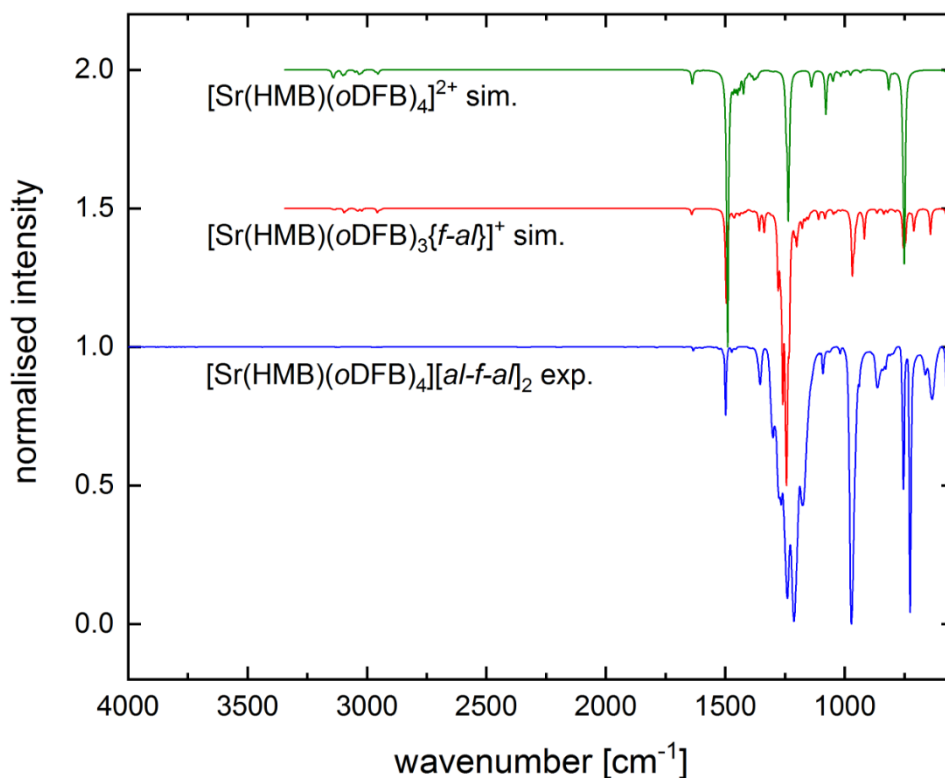

Figure S- 25 Experimental IR data on bulk material containing  $[\text{Sr}(\text{HMB})(\text{oDFB})_4][\text{al-f-al}]_2$  **6** (blue). Simulated IR data on  $[\text{Sr}(\text{HMB})(\text{oDFB})_4]^{2+}$  (green) &  $[\text{Sr}(\text{HMB})(\text{oDFB})_3\{\text{f-al}\}]^+$  (red) (BP86/def2-def-SV(P)/D3(BJ) ). IR (ZnSe ATR-corrected, 128 scans).

### S-1.9 Reaction between $[\text{Ba}(\text{HMB})(\text{oDFB})_3\{\text{f-al}\}][\text{al-f-al}]$ **4** and $\text{TMS-F-Al}(\text{OR}^{\text{F}})_3$ .

$[\text{Ba}(\text{HMB})(\text{oDFB})_3\{\text{f-al}\}][\text{al-f-al}]$  **4** (80 mg, 0.028 mmol) and  $\text{TMS-F-Al}(\text{OR}^{\text{F}})_3$  (23 mg, 0.028 mmol, 1.0 eq.) were weighed into an NMR Tube equipped with a J.Young valve and dissolved in oDFB (0.8 ml).

Presence of  $\text{TMS-F-Al}(\text{OR}^{\text{F}})_3$  besides  $[\text{Ba}(\text{HMB})(\text{oDFB})_3\{\text{f-al}\}][\text{al-f-al}]$  **4** with no significant change of ratio between  $[\text{al-f-al}]^-$  and Barium coordinated  $[\text{f-al}]^-$ . Abstraction of  $[\text{f-al}]^-$  and shift to more dicationic Barium complexes was therefore deemed unsuccessful.

$^1\text{H-NMR}$  (300.18 MHz, 1,2- $\text{C}_6\text{H}_4\text{F}_2$ , 298 K)  $\delta$  = 2.16 (s, 18 H, ( $\text{C}_6(\text{CH}_3)_6$ ), 0.59 (s,  $\text{SiCH}_x$ ), 0.54 (s,  $\text{SiCH}_x$ ) ppm.

$^{19}\text{F-NMR}$  (282.45 MHz, 1,2- $\text{C}_6\text{F}_2\text{H}_4$ , 298 K)  $\delta$  = -75.6 (s, 54 F,  $[\mu\text{F}-\{\text{Al}(\text{OC}(\text{CF}_3)_3)_2\}]$ ), -75.6 (s), -75.8 (s, 27 F,  $[\text{Ba}(\text{HMB})(\text{oDFB})_3\{\text{F-Al}(\text{O}(\text{C}(\text{CF}_3)_3)_3\}]^+$ ), ratio  $[\mu\text{F}-\{\text{Al}(\text{OC}(\text{CF}_3)_3)_2\}] : [\text{Ba}(\text{HMB})(\text{oDFB})_3\{\text{F-Al}(\text{O}(\text{C}(\text{CF}_3)_3)_3\}]^+$ ; 1 : 3.2), -76.0 (s, 27 F,  $\text{TMS-F-Al}(\text{OR}^{\text{F}})_3$ ), -130.4 (s, 1 F,  $[\text{Ba}(\text{HMB})(\text{oDFB})_3\{\text{F-Al}(\text{O}(\text{C}(\text{CF}_3)_3)_3\}]^+$ ), -156.4 (s, 1 F,  $[\text{F-Al}(\text{O}(\text{C}(\text{CF}_3)_3)_3]^-$ ), -184.5 (br. s, 1 F,  $[\mu\text{F}-\{\text{Al}(\text{OC}(\text{CF}_3)_3)_2\}]$ ) ppm.  $^{27}\text{Al-NMR}$  (78.22 MHz, 1,2- $\text{C}_6\text{F}_2\text{H}_4$ , 298 K)  $\delta$  = 39.3 ppm (br. s,  $[\text{F-Al}(\text{O}(\text{C}(\text{CF}_3)_3)_3]^-$  &  $[\mu\text{F}-\{\text{Al}(\text{OC}(\text{CF}_3)_3)_2\}]^-$  &  $\text{TMS-F-Al}(\text{OR}^{\text{F}})_3$ ).

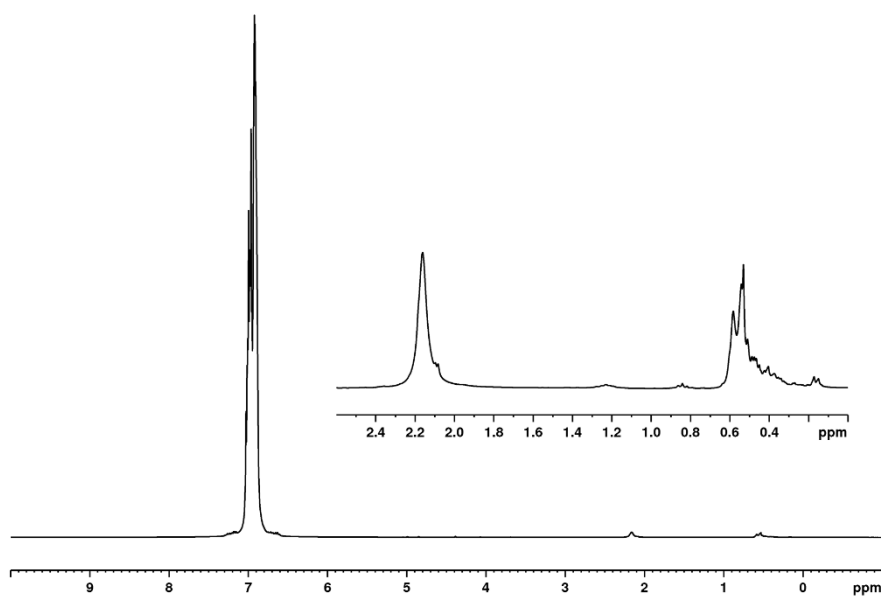

Figure S- 26  $^1\text{H-NMR}$  (300.18 MHz,  $1,2\text{-C}_6\text{F}_2\text{H}_4$ , 298 K) of reaction between  $[\text{Ba}(\text{HMB})(\text{oDFB})_3\{\text{f-al}\}][\text{al-f-al}]$  **4** and  $\text{TMS-F-Al}(\text{OR}^f)_3$ .

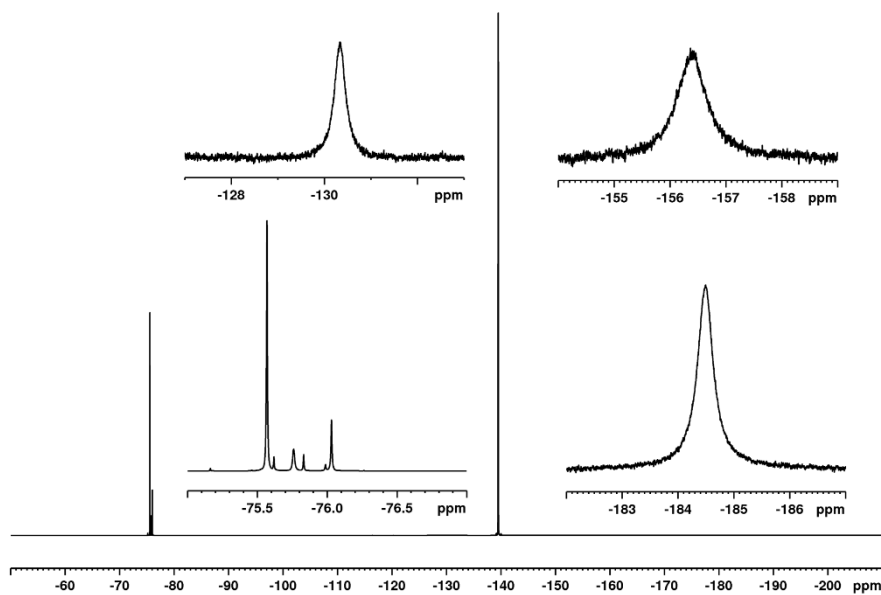

Figure S- 27  $^{19}\text{F-NMR}$  (282.45 MHz,  $1,2\text{-C}_6\text{F}_2\text{H}_4$ , 298 K) of reaction between  $[\text{Ba}(\text{HMB})(\text{oDFB})_3\{\text{f-al}\}][\text{al-f-al}]$  **4** and  $\text{TMS-F-Al}(\text{OR}^f)_3$ .

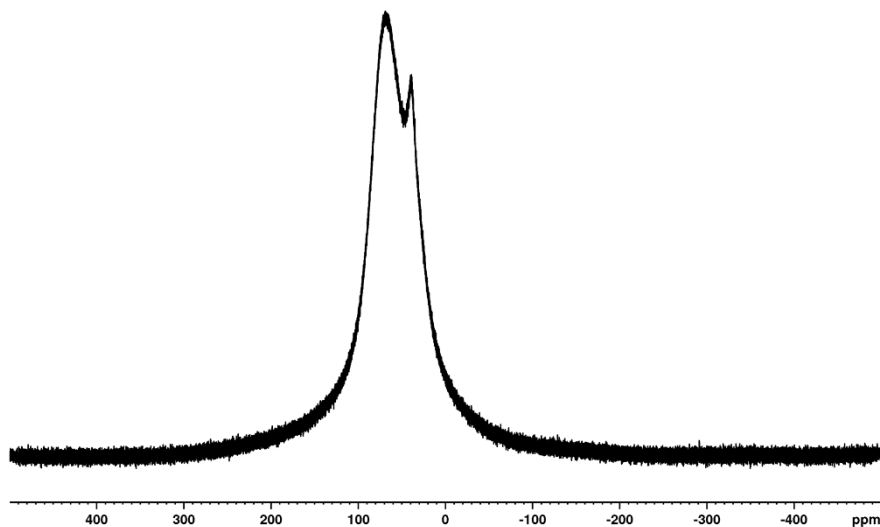

Figure S- 28  $^{27}\text{Al}$ -NMR (78.22 MHz, 1,2- $\text{C}_6\text{F}_2\text{H}_4$ , 298 K) of reaction between  $[\text{Ba}(\text{HMB})(\text{oDFB})_3\{f\text{-al}\}][\text{al-f-al}]$  **4** and TMS-F-Al(OR<sup>F</sup>)<sub>3</sub>.

#### S-1.10 Reaction between $[\text{Ba}(\text{HMB})(\text{oDFB})_3\{f\text{-al}\}][\text{al-f-al}]$ **4** and POEt<sub>3</sub>.

$[\text{Ba}(\text{HMB})(\text{oDFB})_3\{f\text{-al}\}][\text{al-f-al}]$  **4** (110 mg, 0.038 mmol) and POEt<sub>3</sub> (5 mg, 0.038 mmol, 1.0 eq.) were weighed into an NMR Tube equipped with a J.Young valve and dissolved in oDFB (0.8 ml). Sample was collected directly and again after 14 days.

Substantial change in NMR spectra between the two measurements was detected. The fluoride-bridged anion has completely vanished after 14 days.  $^1\text{H}$ -NMR resonance corresponding to HMB has sharpened compared to collected samples of neat **4** suggesting difference in coordination environment.  $^{31}\text{P}$ -NMR resonances have changed in composition and ratio and could not be further determined. Splitting of  $[\text{al-f-al}]^-$  by nucleophilic attack of POEt<sub>3</sub> seems likely, as it has been observed before with other  $\sigma$ -Donor ligands, to form respective POEt<sub>3</sub> Al(OR<sup>F</sup>)<sub>3</sub> adduct. Similar resonances have been found when reacting TMS-F-Al(OR<sup>F</sup>)<sub>3</sub> with 1 eq. of POEt<sub>3</sub> as shown below.

$^1\text{H}$ -NMR (200.13 MHz, 1,2- $\text{C}_6\text{H}_4\text{F}_2$ , 298 K)  $\delta$  = 2.11 (s, 18 H, (C<sub>6</sub>(CH<sub>3</sub>)<sub>6</sub>), 2.02 (m, 3H, -CH<sub>2</sub>CH<sub>3</sub>), 1.24 (m, -CH<sub>2</sub>CH<sub>3</sub>) ppm.  $^{19}\text{F}$ -NMR (188.31 MHz, 1,2- $\text{C}_6\text{F}_2\text{H}_4$ , 298 K)  $\delta$  = -75.6 (s, 54 F, [ $\mu\text{F}$ -{Al(OC(CF<sub>3</sub>)<sub>3</sub>)<sub>3</sub>}<sub>2</sub>]), -75.6 (s), -75.7 (s), -75.8 (s, 27 F, [Ba(HMB)(oDFB)<sub>3</sub>{F-Al(O(CF<sub>3</sub>)<sub>3</sub>)<sub>3</sub>}]<sup>+</sup>), -152.6 (s, 1 F, [F-

$\text{Al}(\text{O}(\text{C}(\text{CF}_3)_3)_3)^-$ , -184.5 (br. s, 1 F,  $[\mu\text{F}-\{\text{Al}(\text{OC}(\text{CF}_3)_3)_2\}_2]$ ) ppm.  $^{31}\text{P}$ -NMR (81.01 MHz, 1,2- $\text{C}_6\text{F}_4\text{H}_2$ , 298 K)  
 $\delta = 85.5$  (s), 82.6 (s), 78.2 (s), 64.5 (s) ppm.

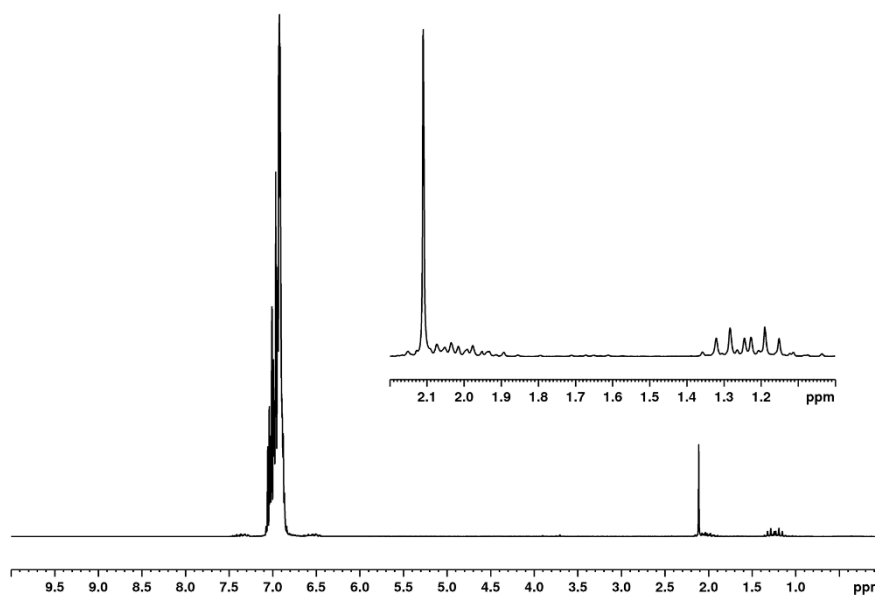

Figure S- 29  $^1\text{H}$ -NMR (200.13 MHz, 1,2- $\text{C}_6\text{F}_4\text{H}_2$ , 298 K) of reaction between  $[\text{Ba}(\text{HMB})(\text{oDFB})_3\{\text{f-al}\}][\text{al-f-al}]$  **4** and  $\text{POEt}_3$ .

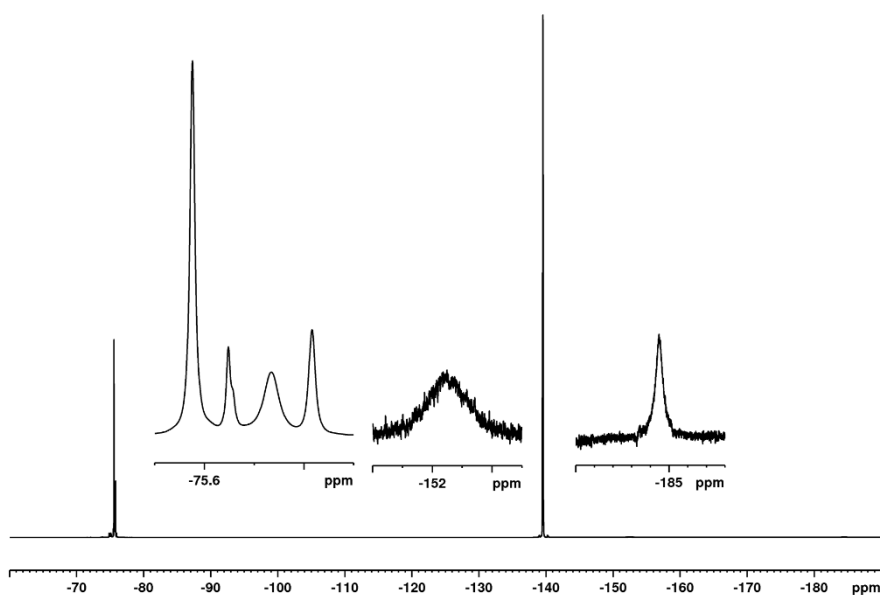

Figure S- 30  $^{31}\text{P}$ -NMR (188.31 MHz, 1,2- $\text{C}_6\text{F}_4\text{H}_2$ , 298 K) of reaction between  $[\text{Ba}(\text{HMB})(\text{oDFB})_3\{\text{f-al}\}][\text{al-f-al}]$  **4** and  $\text{POEt}_3$ .



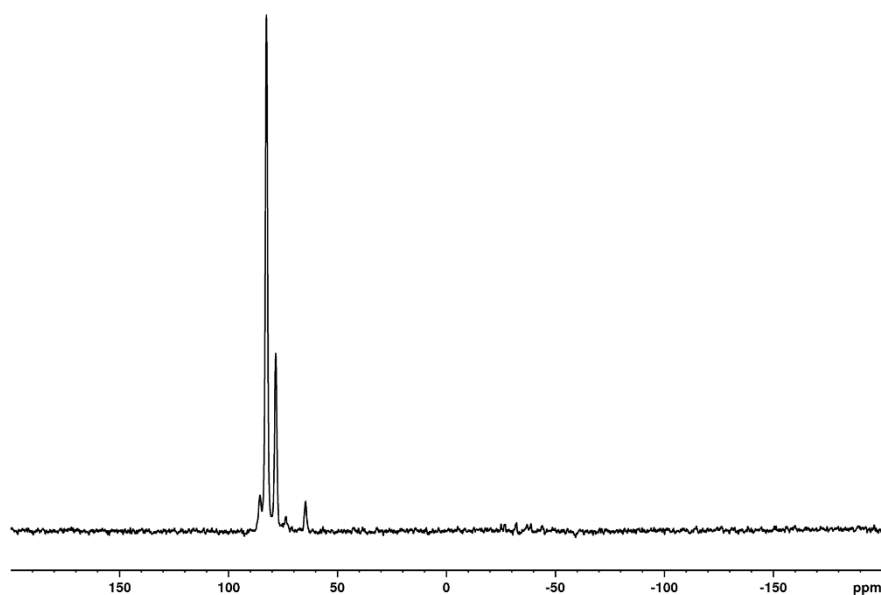

Figure S- 31  $^{31}\text{P}$ -NMR (81.01 MHz, 1,2- $\text{C}_6\text{F}_2\text{H}_4$ , 298 K) of reaction between  $[\text{Ba}(\text{HMB})(\text{oDFB})_3\{\text{f-al}\}][\text{al-f-al}]$  **4** and  $\text{POEt}_3$ .

$^1\text{H}$ -NMR (400.17 MHz, 1,2- $\text{C}_6\text{F}_2\text{H}_4$ , 298 K)  $\delta$  = 2.11 (s, 18 H,  $\text{C}_6(\text{CH}_3)_6$ ), 2.02 (m, 3H,  $-\text{CH}_2\text{CH}_3$ ), 1.22 (m,  $-\text{CH}_2\text{CH}_3$ ) ppm.  $^{19}\text{F}$ -NMR (376.54 MHz, 1,2- $\text{C}_6\text{F}_2\text{H}_4$ , 298 K)  $\delta$  = -75.7 (s), -75.7 (s), -75.8 (s, 27 F,  $[\text{F-Al}(\text{O}(\text{C}(\text{CF}_3))_3)]^-$ ), -135.2 (s, 1 F,  $[\text{F-Al}(\text{O}(\text{C}(\text{CF}_3))_3)]$ ) ppm.  $^{31}\text{P}$ -NMR (161.99 MHz, 1,2- $\text{C}_6\text{F}_2\text{H}_4$ , 298 K)  $\delta$  = 85.5 (s), 82.7 (s), 82.5 (s), 78.2 (s) ppm.

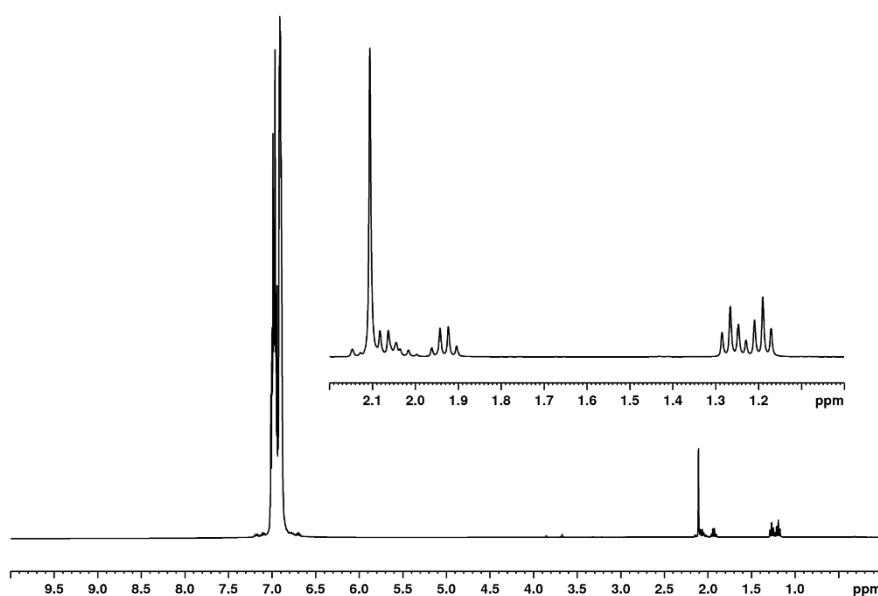

Figure S- 32  $^1\text{H}$ -NMR (400.17 MHz, 1,2- $\text{C}_6\text{F}_2\text{H}_4$ , 298 K) of reaction between  $[\text{Ba}(\text{HMB})(\text{oDFB})_3\{\text{f-al}\}][\text{al-f-al}]$  **4** and  $\text{POEt}_3$ . Recollected after 14 days.

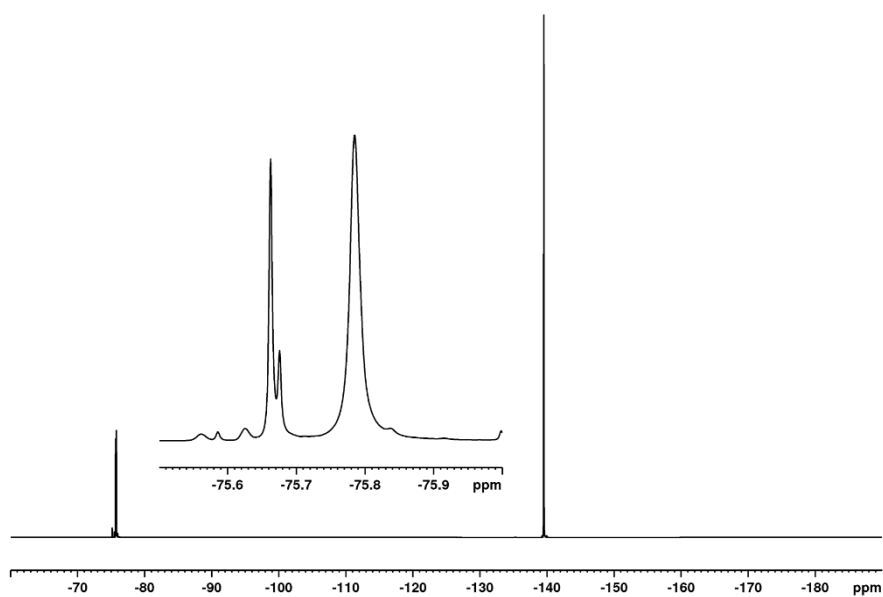

Figure S- 33  $^{19}\text{F}$ -NMR (376.54 MHz, 1,2- $\text{C}_6\text{F}_2\text{H}_4$ , 298 K) of reaction between  $[\text{Ba}(\text{HMB})(\text{oDFB})_3\{\text{f-al}\}][\text{al-f-al}]$  **4** and  $\text{POEt}_3$ .  
 Recollected after 14 days.

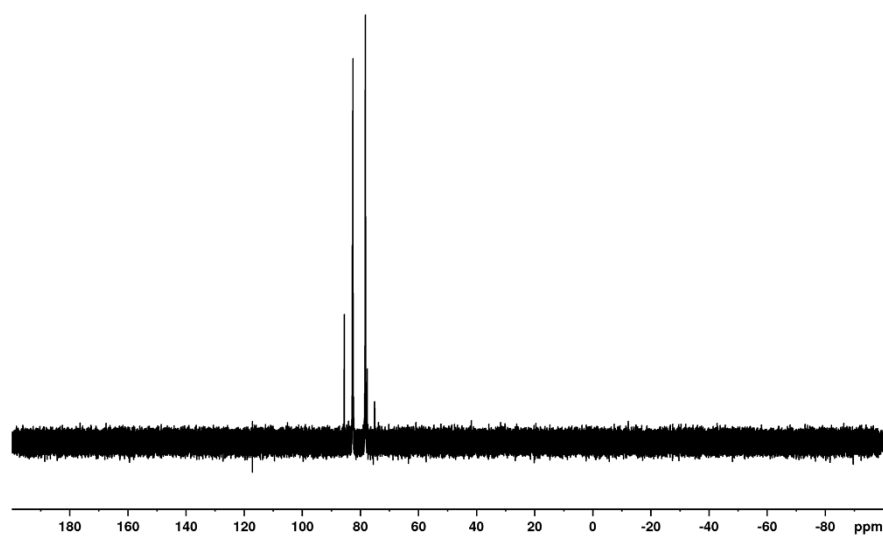

Figure S- 34  $^{31}\text{P}$ -NMR (161.99 MHz, 1,2- $\text{C}_6\text{F}_2\text{H}_4$ , 298 K) of reaction between  $[\text{Ba}(\text{HMB})(\text{oDFB})_3\{\text{f-al}\}][\text{al-f-al}]$  **4** and  $\text{POEt}_3$ .  
 Recollected after 14 days.

### S-1.11 Reaction between $\text{POEt}_3$ and $\text{TMS-F-Al}(\text{OR}^{\text{F}})_3$ .

$\text{TMS-F-Al}(\text{OR}^{\text{F}})_3$  (61 mg, 0.075 mmol) and  $\text{POEt}_3$  (10 mg, 0.075 mmol, 1.0 eq.) were weighed into an NMR Tube equipped with a J.Young valve and dissolved in  $\text{oDFB}$  (0.8 ml).

$^1\text{H-NMR}$  (300.18 MHz, 1,2- $\text{C}_6\text{H}_4\text{F}_2$ , 298 K)  $\delta$  = 1.94 (m, 3H,  $-\text{CH}_2\text{CH}_3$ ), 1.19 (m,  $-\text{CH}_2\text{CH}_3$ ) ppm. 0.17 (d, 9 H,  $\text{Si}(\text{CH}_3)\text{-F-Al}(\text{OR}^{\text{F}})_3$ ), 0.1 (s,  $\text{SiCH}_x$ ) ppm.  $^{19}\text{F-NMR}$  (282.45 MHz, 1,2- $\text{C}_6\text{F}_2\text{H}_4$ , 298 K)  $\delta$  =  $-75.6$  (s, 27 F,  $\text{TMS-F-Al}(\text{O}(\text{C}(\text{CF}_3))_3)$ ),  $-75.6$  (s, 54 F,  $[\mu\text{F}\{-\text{Al}(\text{OC}(\text{CF}_3)_3)_2\}]_2$ ),  $-157.7$  (dec, 1 F,  $\text{TMS-F-Al}(\text{O}(\text{C}(\text{CF}_3))_3)$ ),  $-183.5$  (br. s, 1 F,  $[\mu\text{F}\{-\text{Al}(\text{OC}(\text{CF}_3)_3)_2\}]_2$ ) ppm.  $^{27}\text{Al-NMR}$  (78.22 MHz, 1,2- $\text{C}_6\text{F}_2\text{H}_4$ , 298 K)  $\delta$  = 41.3 (br s), 37.6 ( $\text{TMS-F-Al}(\text{OR}^{\text{F}})_3$ ), 1.4 (br. s) ppm.  $^{31}\text{P-NMR}$  (121.52 MHz, 1,2- $\text{C}_6\text{F}_2\text{H}_4$ , 298 K)  $\delta$  = 82.7 (s), 79.63 (s), 78.3 (s), 75.4 (s), 72.4 (s) ppm.

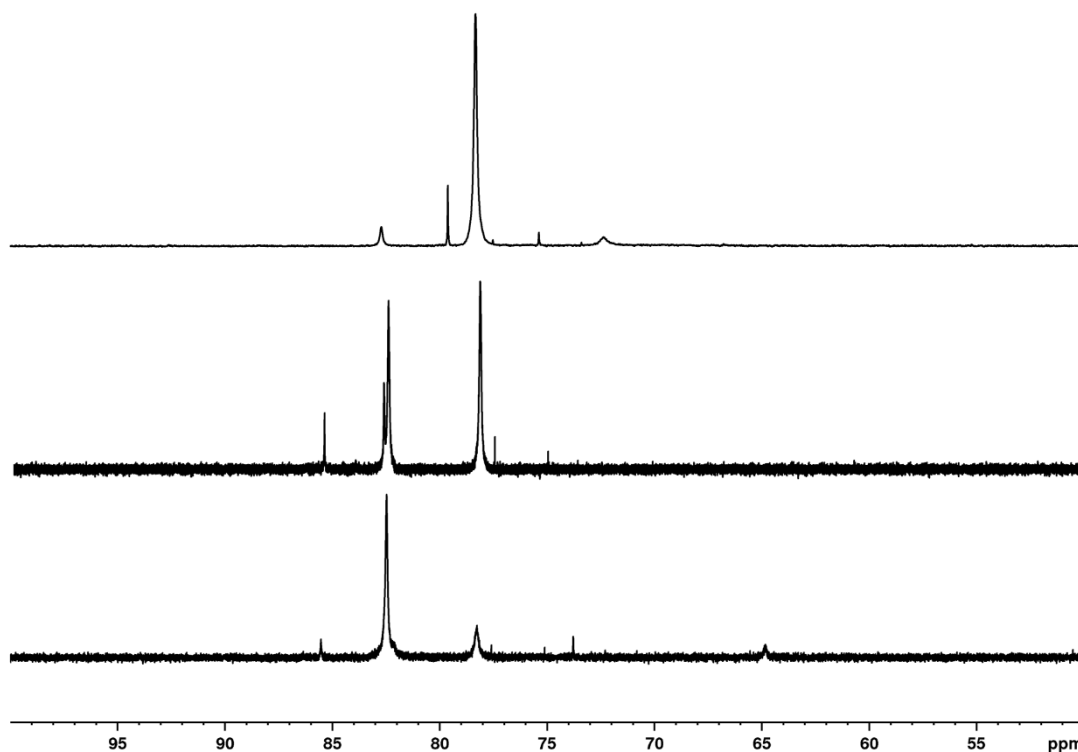

Figure S- 35 Stacked plot of (bottom trace)  $^{31}\text{P}\{^1\text{H}\}$ -NMR (81.01 MHz, 1,2- $\text{C}_6\text{F}_2\text{H}_4$ , 298 K) of reaction between  $[\text{Ba}(\text{HMB})(\text{oDFB})_3\{\text{f-al}\}]\{\text{al-f-al}\}$  **4** and  $\text{POEt}_3$  (middle trace)  $^{31}\text{P}\{^1\text{H}\}$ -NMR (161.99 MHz, 1,2- $\text{C}_6\text{F}_2\text{H}_4$ , 298 K) of reaction between  $[\text{Ba}(\text{HMB})(\text{oDFB})_3\{\text{f-al}\}]\{\text{al-f-al}\}$  **4** and  $\text{POEt}_3$ . Recollected after 14 days. And (top trace)  $^{31}\text{P}\{^1\text{H}\}$ -NMR (121.52 MHz, 1,2- $\text{C}_6\text{F}_2\text{H}_4$ , 298 K) of reaction between  $\text{POEt}_3$  and  $\text{TMS-F-Al}(\text{OR}^{\text{F}})_3$ .

## S-2 Crystallographic data

|                                                              | 1                                                                                               | 2                                                                                | 3                                                                                | 4                                                                                |
|--------------------------------------------------------------|-------------------------------------------------------------------------------------------------|----------------------------------------------------------------------------------|----------------------------------------------------------------------------------|----------------------------------------------------------------------------------|
| Empirical formula                                            | C <sub>50</sub> H <sub>22</sub> Al <sub>2</sub> F <sub>74</sub> MgN <sub>6</sub> O <sub>8</sub> | C <sub>52</sub> H <sub>26</sub> Al <sub>2</sub> CaF <sub>68</sub> O <sub>7</sub> | C <sub>60</sub> H <sub>26</sub> Al <sub>3</sub> CaF <sub>87</sub> O <sub>9</sub> | C <sub>66</sub> H <sub>30</sub> Al <sub>3</sub> BaF <sub>89</sub> O <sub>9</sub> |
| Formula weight                                               | 2319.00                                                                                         | 2148.77                                                                          | 2664.83                                                                          | 2876.18                                                                          |
| Temperature/K                                                | 100(2)                                                                                          | 100(2)                                                                           | 100(2)                                                                           | 100(2)                                                                           |
| Crystal system                                               | triclinic                                                                                       | monoclinic                                                                       | monoclinic                                                                       | monoclinic                                                                       |
| Space group                                                  | <i>P</i> 1                                                                                      | <i>P</i> 2 <sub>1</sub>                                                          | <i>P</i> 2 <sub>1</sub> / <i>c</i>                                               | <i>P</i> <i>c</i>                                                                |
| <i>a</i> /Å                                                  | 14.3953(4)                                                                                      | 17.765(6)                                                                        | 23.4290(15)                                                                      | 28.173(3)                                                                        |
| <i>b</i> /Å                                                  | 18.2606(5)                                                                                      | 20.654(7)                                                                        | 18.9075(12)                                                                      | 16.4313(17)                                                                      |
| <i>c</i> /Å                                                  | 25.8315(7)                                                                                      | 20.031(8)                                                                        | 22.4874(14)                                                                      | 20.453(2)                                                                        |
| $\alpha$ /°                                                  | 73.7840(10)                                                                                     | 90                                                                               | 90                                                                               | 90                                                                               |
| $\beta$ /°                                                   | 74.370(2)                                                                                       | 93.018(14)                                                                       | 118.270(2)                                                                       | 90.107(4)                                                                        |
| $\gamma$ /°                                                  | 66.8210(10)                                                                                     | 90                                                                               | 90                                                                               | 90                                                                               |
| Volume/Å <sup>3</sup>                                        | 5895.1(3)                                                                                       | 7339(5)                                                                          | 8773.4(10)                                                                       | 9467.8(18)                                                                       |
| <i>Z</i>                                                     | 3                                                                                               | 4                                                                                | 4                                                                                | 4                                                                                |
| $\rho_{\text{calc}}$ /cm <sup>3</sup>                        | 1.960                                                                                           | 1.945                                                                            | 2.017                                                                            | 2.018                                                                            |
| $\mu$ /mm <sup>-1</sup>                                      | 0.275                                                                                           | 0.332                                                                            | 0.340                                                                            | 0.676                                                                            |
| <i>F</i> (000)                                               | 3396                                                                                            | 4208                                                                             | 5200                                                                             | 5576                                                                             |
| Crystal size/mm <sup>3</sup>                                 | 0.25×0.18×0.1                                                                                   | 0.35×0.27×0.23                                                                   | 0.35×0.3×0.28                                                                    | 0.3×0.27×0.17                                                                    |
| Radiation                                                    | MoK $\alpha$ ( $\lambda$ =0.71073 Å)                                                            | MoK $\alpha$ ( $\lambda$ =0.71073 Å)                                             | MoK $\alpha$ ( $\lambda$ =0.71073 Å)                                             | MoK $\alpha$ ( $\lambda$ =0.71073 Å)                                             |
| 2 $\theta$ range /°                                          | 1.67 to 52.70                                                                                   | 2.04 to 52.88                                                                    | 1.97 to 55.97                                                                    | 1.45 to 54.16                                                                    |
| Index ranges                                                 | -17 ≤ <i>h</i> ≤ 17, -22 ≤ <i>k</i> ≤ 22, -32 ≤ <i>l</i> ≤ 32                                   | twinned                                                                          | -30 ≤ <i>h</i> ≤ 30, -24 ≤ <i>k</i> ≤ 24, -29 ≤ <i>l</i> ≤ 29                    | -36 ≤ <i>h</i> ≤ 36; -20 ≤ <i>k</i> ≤ 21; -26 ≤ <i>l</i> ≤ 26                    |
| Reflections collected                                        | 110248                                                                                          | 25915                                                                            | 267897                                                                           | 241837                                                                           |
| Independent reflections                                      | 43456, [ <i>R</i> <sub>int</sub> = 0.0327, <i>R</i> <sub>sigma</sub> = 0.0506]                  | 25915 [ <i>R</i> <sub>int</sub> = 0.0615, <i>R</i> <sub>sigma</sub> = 0.0667]    | 21106, [ <i>R</i> <sub>int</sub> = 0.1172, <i>R</i> <sub>sigma</sub> = 0.0406]   | 41457 [ <i>R</i> <sub>int</sub> = 0.0426, <i>R</i> <sub>sigma</sub> = 0.0340]    |
| Data/restraints/parameters                                   | 43456/160301/5086                                                                               | 25915/35125/2475                                                                 | 21106/30760/2070                                                                 | 41457/48470/3041                                                                 |
| Goodness-of-fit on <i>F</i> <sup>2</sup>                     | 1.040                                                                                           | 1.058                                                                            | 1.029                                                                            | 0.942                                                                            |
| Final <i>R</i> indexes [ <i>I</i> ≥ 2 $\sigma$ ( <i>I</i> )] | <i>R</i> <sub>1</sub> = 0.0511, <i>wR</i> <sub>2</sub> = 0.1185                                 | <i>R</i> <sub>1</sub> = 0.0863, <i>wR</i> <sub>2</sub> = 0.2002                  | <i>R</i> <sub>1</sub> = 0.0556, <i>wR</i> <sub>2</sub> = 0.1526                  | <i>R</i> <sub>1</sub> = 0.0323, <i>wR</i> <sub>2</sub> = 0.0751                  |
| Final <i>R</i> indexes [all data]                            | <i>R</i> <sub>1</sub> = 0.0722, <i>wR</i> <sub>2</sub> = 0.1294                                 | <i>R</i> <sub>1</sub> = 0.1221, <i>wR</i> <sub>2</sub> = 0.2190                  | <i>R</i> <sub>1</sub> = 0.0769, <i>wR</i> <sub>2</sub> = 0.1664                  | <i>R</i> <sub>1</sub> = 0.0355, <i>wR</i> <sub>2</sub> = 0.0768                  |
| Largest diff. peak/hole / e Å <sup>-3</sup>                  | 0.96/-0.53                                                                                      | 1.21/-0.70                                                                       | 0.77/-0.59                                                                       | 0.78/-0.45                                                                       |
| CCDC ref.                                                    | 1969782                                                                                         | 1969780                                                                          | 1969779                                                                          | 1969777                                                                          |

|                                             | 5                                                                                 | 6                                                                                   | 7                                                                                  | InHMB Al-F-Al                                                                    |
|---------------------------------------------|-----------------------------------------------------------------------------------|-------------------------------------------------------------------------------------|------------------------------------------------------------------------------------|----------------------------------------------------------------------------------|
| Empirical formula                           | C <sub>66</sub> H <sub>30</sub> Al <sub>3</sub> F <sub>89</sub> O <sub>9</sub> Sr | C <sub>84</sub> H <sub>34</sub> Al <sub>4</sub> F <sub>118</sub> O <sub>12</sub> Sr | C <sub>84</sub> H <sub>34</sub> Al <sub>4</sub> CaF <sub>118</sub> O <sub>12</sub> | C <sub>36</sub> H <sub>18</sub> Al <sub>2</sub> F <sub>55</sub> InO <sub>6</sub> |
| Formula weight                              | 2826.46                                                                           | 3672.65                                                                             | 3625.11                                                                            | 1760.28                                                                          |
| Temperature/K                               | 100(2)                                                                            | 100(2)                                                                              | 100(2)                                                                             | 100(2)                                                                           |
| Crystal system                              | triclinic                                                                         | triclinic                                                                           | triclinic                                                                          | triclinic                                                                        |
| Space group                                 | $P\bar{1}$                                                                        | $P\bar{1}$                                                                          | $P\bar{1}$                                                                         | $P\bar{1}$                                                                       |
| a/Å                                         | 13.5412(9)                                                                        | 13.8661(5)                                                                          | 13.9542(7)                                                                         | 10.6319(4)                                                                       |
| b/Å                                         | 25.3825(17)                                                                       | 20.2883(8)                                                                          | 20.3286(11)                                                                        | 22.3961(8)                                                                       |
| c/Å                                         | 27.3385(17)                                                                       | 23.0336(9)                                                                          | 22.9128(12)                                                                        | 24.4869(9)                                                                       |
| $\alpha$ /°                                 | 90.017(2)                                                                         | 80.0310(10)                                                                         | 80.085(2)                                                                          | 79.1440(10)                                                                      |
| $\beta$ /°                                  | 90.111(2)                                                                         | 85.9850(10)                                                                         | 84.743(2)                                                                          | 79.6960(10)                                                                      |
| $\gamma$ /°                                 | 92.474(2)                                                                         | 79.9420(10)                                                                         | 80.239(2)                                                                          | 77.7590(10)                                                                      |
| Volume/Å <sup>3</sup>                       | 9387.7(11)                                                                        | 6278.6(4)                                                                           | 6296.8(6)                                                                          | 5537.2(4)                                                                        |
| Z                                           | 4                                                                                 | 2                                                                                   | 2                                                                                  | 4                                                                                |
| $\rho_{\text{calc}}$ /cm <sup>3</sup>       | 2.000                                                                             | 1.943                                                                               | 1.912                                                                              | 2.112                                                                            |
| $\mu$ /mm <sup>-1</sup>                     | 0.833                                                                             | 0.687                                                                               | 0.307                                                                              | 0.689                                                                            |
| F(000)                                      | 5504                                                                              | 3572                                                                                | 3536                                                                               | 3408                                                                             |
| Crystal size/mm <sup>3</sup>                | 0.3×0.18×0.14                                                                     | 0.29×0.27×0.21                                                                      | 0.4×0.35×0.27                                                                      | 0.25×0.11×0.07                                                                   |
| Radiation                                   | MoK $\alpha$ ( $\lambda$ =0.71073 Å)                                              | MoK $\alpha$ ( $\lambda$ =0.71073 Å)                                                | MoK $\alpha$ ( $\lambda$ =0.71073 Å)                                               | MoK $\alpha$ ( $\lambda$ =0.71073 Å)                                             |
| 2 $\theta$ range /°                         | 4.47 to 55.80                                                                     | 1.80 to 55.96                                                                       | 1.81 to 54.19                                                                      | 1.71 to 58.06                                                                    |
| Index ranges                                | -17 ≤ h ≤ 17, -33 ≤ k ≤ 33, -35 ≤ l ≤ 35                                          | -18 ≤ h ≤ 18, -26 ≤ k ≤ 26, -30 ≤ l ≤ 30                                            | -17 ≤ h ≤ 17, -26 ≤ k ≤ 26, -29 ≤ l ≤ 29                                           | -14 ≤ h ≤ 14, -30 ≤ k ≤ 30, -33 ≤ l ≤ 33                                         |
| Reflections collected                       | 167981                                                                            | 283181                                                                              | 221765                                                                             | 152697                                                                           |
| Independent reflections                     | 44723 [ $R_{\text{int}} = 0.0624$ , $R_{\text{sigma}} = 0.0660$ ]                 | 30200 [ $R_{\text{int}} = 0.0462$ , $R_{\text{sigma}} = 0.0268$ ]                   | 27716 [ $R_{\text{int}} = 0.0360$ , $R_{\text{sigma}} = 0.0221$ ]                  | 29472 [ $R_{\text{int}} = 0.0536$ , $R_{\text{sigma}} = 0.0474$ ]                |
| Data/restraints/parameters                  | 44723/134045/4542                                                                 | 30200/44834/2616                                                                    | 27716/55435/2874                                                                   | 29472/35187/2194                                                                 |
| Goodness-of-fit on F <sup>2</sup>           | 1.026                                                                             | 1.008                                                                               | 1.031                                                                              | 1.049                                                                            |
| Final R indexes [ $l \geq 2\sigma(l)$ ]     | $R_1 = 0.0543$ , $wR_2 = 0.1357$                                                  | $R_1 = 0.0376$ , $wR_2 = 0.0819$                                                    | $R_1 = 0.0519$ , $wR_2 = 0.1288$                                                   | $R_1 = 0.0496$ , $wR_2 = 0.1162$                                                 |
| Final R indexes [all data]                  | $R_1 = 0.0746$ , $wR_2 = 0.1484$                                                  | $R_1 = 0.0588$ , $wR_2 = 0.0907$                                                    | $R_1 = 0.0686$ , $wR_2 = 0.1407$                                                   | $R_1 = 0.0780$ , $wR_2 = 0.1295$                                                 |
| Largest diff. peak/hole / e Å <sup>-3</sup> | 0.82/-0.83                                                                        | 0.65/-0.55                                                                          | 0.89/-0.48                                                                         | 1.22/-0.91                                                                       |
| CCDC ref.                                   | 1969784                                                                           | 1969783                                                                             | 1969778                                                                            | 1969781                                                                          |

Table S 1 Fractional Atomic Coordinates ( $\times 10^4$ ) and Equivalent Isotropic Displacement Parameters ( $\text{\AA}^2 \times 10^3$ ) for  $[\text{Mg}(\text{MeCN})_6][\text{Al}(\text{OR}^f)_4]_2$  1.  $U_{\text{eq}}$  is defined as 1/3 of of the trace of the orthogonalised  $U_{ij}$  tensor.

| Atom | x           | y            | z            | $U_{\text{eq}}$ |
|------|-------------|--------------|--------------|-----------------|
| Al01 | 0.26289(13) | 0.32665(10)  | 0.74561(7)   | 0.0198(4)       |
| Al02 | 0.59013(14) | -0.03166(11) | 0.39871(7)   | 0.0225(4)       |
| Al03 | 0.97191(13) | -0.04456(10) | 0.70773(7)   | 0.0198(4)       |
| Al04 | 0.96147(13) | 0.63078(11)  | 0.06903(7)   | 0.0216(4)       |
| Al05 | 0.63790(13) | 1.27624(10)  | 0.05182(7)   | 0.0191(4)       |
| Al06 | 1.31091(14) | -0.38312(11) | 0.38198(7)   | 0.0219(4)       |
| O1_1 | 0.6792(3)   | 1.3413(2)    | -0.00375(16) | 0.0255(9)       |
| C1_1 | 0.6532(5)   | 1.4086(3)    | -0.0433(2)   | 0.0269(13)      |
| C2_1 | 0.7543(5)   | 1.4183(4)    | -0.0789(3)   | 0.0400(16)      |
| F1_1 | 0.7977(3)   | 1.3661(3)    | -0.11286(17) | 0.0533(11)      |
| F2_1 | 0.7396(4)   | 1.4931(3)    | -0.1101(2)   | 0.0618(14)      |
| F3_1 | 0.8238(3)   | 1.4029(3)    | -0.04873(19) | 0.0557(12)      |
| C3_1 | 0.5900(6)   | 1.4841(4)    | -0.0171(3)   | 0.0472(18)      |
| F4_1 | 0.5181(4)   | 1.4711(3)    | 0.0236(2)    | 0.0669(14)      |
| F5_1 | 0.6520(4)   | 1.5057(3)    | 0.0024(2)    | 0.0682(15)      |
| F6_1 | 0.5464(4)   | 1.5489(3)    | -0.0539(2)   | 0.0658(14)      |
| C4_1 | 0.5909(5)   | 1.3993(4)    | -0.0797(3)   | 0.0367(15)      |
| F7_1 | 0.4931(3)   | 1.4140(3)    | -0.05516(18) | 0.0534(12)      |
| F8_1 | 0.5920(3)   | 1.4508(3)    | -0.12812(16) | 0.0497(11)      |
| F9_1 | 0.6281(4)   | 1.3254(3)    | -0.08975(17) | 0.0503(11)      |
| O1_2 | 0.7427(8)   | 1.1873(7)    | 0.0622(5)    | 0.027(3)        |
| C1_2 | 0.8231(6)   | 1.1319(5)    | 0.0375(3)    | 0.0258(17)      |
| C2_2 | 0.8996(6)   | 1.1704(5)    | -0.0039(3)   | 0.0335(18)      |
| F1_2 | 0.9095(11)  | 1.2266(5)    | 0.0163(6)    | 0.0512(19)      |
| F2_2 | 0.9942(5)   | 1.1163(4)    | -0.0148(3)   | 0.0419(17)      |
| F3_2 | 0.8683(5)   | 1.2056(4)    | -0.0515(2)   | 0.0466(16)      |
| C3_2 | 0.7872(6)   | 1.0895(5)    | 0.0067(3)    | 0.0380(19)      |
| F4_2 | 0.7430(5)   | 1.0382(4)    | 0.0418(3)    | 0.0571(19)      |
| F5_2 | 0.7181(8)   | 1.1438(8)    | -0.0231(5)   | 0.053(2)        |
| F6_2 | 0.8640(6)   | 1.0446(4)    | -0.0267(4)   | 0.0433(18)      |
| C4_2 | 0.8804(7)   | 1.0676(5)    | 0.0829(3)    | 0.042(2)        |
| F7_2 | 0.8139(11)  | 1.0468(8)    | 0.1254(3)    | 0.061(2)        |
| F8_2 | 0.9460(6)   | 0.9998(5)    | 0.0653(4)    | 0.055(2)        |
| F9_2 | 0.9351(6)   | 1.0967(5)    | 0.1005(3)    | 0.060(2)        |
| O1_4 | 0.5944(14)  | 1.3143(11)   | 0.1112(6)    | 0.029(3)        |
| C1_4 | 0.6255(7)   | 1.3223(6)    | 0.1538(5)    | 0.030(2)        |
| C2_4 | 0.5306(7)   | 1.3799(6)    | 0.1858(4)    | 0.045(2)        |
| F1_4 | 0.4668(5)   | 1.3403(6)    | 0.2158(3)    | 0.068(2)        |
| F2_4 | 0.5580(17)  | 1.4081(11)   | 0.2206(5)    | 0.053(3)        |
| F3_4 | 0.4800(8)   | 1.4442(8)    | 0.1526(7)    | 0.068(3)        |
| C3_4 | 0.7118(8)   | 1.3596(6)    | 0.1342(4)    | 0.039(2)        |
| F4_4 | 0.7826(10)  | 1.3245(7)    | 0.0940(4)    | 0.053(3)        |
| F5_4 | 0.6767(7)   | 1.4379(4)    | 0.1140(3)    | 0.061(2)        |
| F6_4 | 0.7625(15)  | 1.3474(10)   | 0.1741(7)    | 0.043(2)        |
| C4_4 | 0.6643(8)   | 1.2392(6)    | 0.1925(3)    | 0.036(2)        |
| F7_4 | 0.7619(5)   | 1.1976(4)    | 0.1730(2)    | 0.0520(18)      |
| F8_4 | 0.6620(13)  | 1.2471(12)   | 0.2428(6)    | 0.052(3)        |
| F9_4 | 0.6067(9)   | 1.1951(7)    | 0.1971(6)    | 0.058(3)        |
| O1_5 | 0.9282(3)   | 0.5908(3)    | 0.13731(16)  | 0.0284(9)       |
| C1_5 | 0.8803(5)   | 0.5410(4)    | 0.1736(2)    | 0.0298(13)      |
| C2_5 | 0.9406(5)   | 0.4508(4)    | 0.1687(2)    | 0.0310(13)      |
| F1_5 | 1.0414(3)   | 0.4352(3)    | 0.16008(18)  | 0.0456(10)      |

|      |           |           |              |            |
|------|-----------|-----------|--------------|------------|
| F2_5 | 0.9172(3) | 0.3990(2) | 0.21414(16)  | 0.0455(10) |
| F3_5 | 0.9217(3) | 0.4328(2) | 0.12727(15)  | 0.0389(9)  |
| C3_5 | 0.7705(5) | 0.5643(4) | 0.1634(3)    | 0.0360(15) |
| F4_5 | 0.7105(3) | 0.6350(3) | 0.17849(19)  | 0.0525(12) |
| F5_5 | 0.7698(3) | 0.5736(3) | 0.11116(16)  | 0.0444(10) |
| F6_5 | 0.7260(3) | 0.5094(2) | 0.19171(18)  | 0.0461(10) |
| C4_5 | 0.8769(6) | 0.5505(4) | 0.2322(3)    | 0.0433(17) |
| F7_5 | 0.8489(4) | 0.6289(3) | 0.23336(16)  | 0.0560(12) |
| F8_5 | 0.8074(4) | 0.5225(3) | 0.26976(16)  | 0.0565(12) |
| F9_5 | 0.9675(4) | 0.5124(3) | 0.24723(17)  | 0.0544(12) |
| O1_6 | 1.0523(3) | 0.6730(3) | 0.06485(17)  | 0.0269(9)  |
| C1_6 | 1.1340(5) | 0.6674(4) | 0.0844(2)    | 0.0318(14) |
| C2_6 | 1.1692(5) | 0.7391(4) | 0.0498(3)    | 0.0420(17) |
| F1_6 | 1.1057(4) | 0.8096(3) | 0.06349(19)  | 0.0522(11) |
| F2_6 | 1.2640(3) | 0.7286(3) | 0.0550(2)    | 0.0612(13) |
| F3_6 | 1.1732(3) | 0.7457(3) | -0.00371(17) | 0.0492(11) |
| C3_6 | 1.2215(5) | 0.5854(4) | 0.0784(3)    | 0.0432(17) |
| F4_6 | 1.1851(3) | 0.5248(2) | 0.09494(19)  | 0.0472(10) |
| F5_6 | 1.2694(3) | 0.5849(3) | 0.0265(2)    | 0.0543(11) |
| F6_6 | 1.2932(4) | 0.5705(3) | 0.1078(2)    | 0.0657(14) |
| C4_6 | 1.1021(6) | 0.6760(5) | 0.1451(3)    | 0.0438(17) |
| F7_6 | 1.0987(4) | 0.6055(3) | 0.17828(17)  | 0.0565(12) |
| F8_6 | 1.1685(4) | 0.6970(3) | 0.1606(2)    | 0.0638(14) |
| F9_6 | 1.0093(4) | 0.7308(3) | 0.15486(18)  | 0.0541(11) |
| O1_7 | 0.2482(3) | 0.2594(3) | 0.80579(17)  | 0.0350(11) |
| C1_7 | 0.1837(5) | 0.2292(4) | 0.8465(2)    | 0.0308(13) |
| C2_7 | 0.2440(5) | 0.1764(4) | 0.8929(3)    | 0.0412(16) |
| F1_7 | 0.2549(4) | 0.2217(3) | 0.92167(18)  | 0.0590(13) |
| F2_7 | 0.1985(4) | 0.1259(3) | 0.92795(17)  | 0.0549(12) |
| F3_7 | 0.3375(3) | 0.1312(3) | 0.87274(18)  | 0.0561(12) |
| C3_7 | 0.1451(6) | 0.1771(4) | 0.8256(3)    | 0.0462(18) |
| F4_7 | 0.1170(4) | 0.2145(3) | 0.77734(17)  | 0.0530(12) |
| F5_7 | 0.2195(4) | 0.1063(3) | 0.8187(2)    | 0.0658(14) |
| F6_7 | 0.0651(4) | 0.1608(3) | 0.86019(19)  | 0.0636(14) |
| C4_7 | 0.0902(5) | 0.2992(4) | 0.8691(3)    | 0.0427(16) |
| F7_7 | 0.0180(3) | 0.3291(3) | 0.83774(18)  | 0.0524(11) |
| F8_7 | 0.0474(4) | 0.2736(3) | 0.92017(18)  | 0.0664(14) |
| F9_7 | 0.1188(4) | 0.3590(3) | 0.8698(2)    | 0.0598(13) |
| O1_8 | 0.2960(5) | 0.2795(3) | 0.6918(2)    | 0.0652(18) |
| C1_8 | 0.3639(5) | 0.2288(4) | 0.6584(2)    | 0.0388(15) |
| C2_8 | 0.3959(5) | 0.2786(4) | 0.6018(2)    | 0.0363(15) |
| F1_8 | 0.3170(3) | 0.3159(3) | 0.57556(16)  | 0.0448(10) |
| F2_8 | 0.4717(3) | 0.2320(3) | 0.56964(16)  | 0.0480(11) |
| F3_8 | 0.4247(4) | 0.3355(3) | 0.60762(18)  | 0.0604(13) |
| C3_8 | 0.4611(6) | 0.1702(5) | 0.6813(3)    | 0.0499(19) |
| F4_8 | 0.4384(5) | 0.1430(3) | 0.73518(18)  | 0.0684(14) |
| F5_8 | 0.5286(5) | 0.2063(4) | 0.6738(2)    | 0.0783(17) |
| F6_8 | 0.5079(3) | 0.1042(3) | 0.65750(19)  | 0.0545(11) |
| C4_8 | 0.3047(6) | 0.1781(4) | 0.6514(3)    | 0.0497(19) |
| F7_8 | 0.2977(4) | 0.1209(3) | 0.6961(2)    | 0.0613(13) |
| F8_8 | 0.3462(4) | 0.1435(3) | 0.6088(2)    | 0.0594(13) |
| F9_8 | 0.2075(4) | 0.2239(3) | 0.6442(2)    | 0.0703(15) |
| O1_9 | 0.3559(5) | 0.3621(4) | 0.7443(3)    | 0.0634(18) |
| C1_9 | 0.4130(5) | 0.3809(4) | 0.7685(3)    | 0.0356(15) |
| C2_9 | 0.5003(6) | 0.3972(5) | 0.7219(3)    | 0.058(2)   |

|       |            |            |             |            |
|-------|------------|------------|-------------|------------|
| F1_9  | 0.5702(4)  | 0.3290(4)  | 0.7074(2)   | 0.0833(17) |
| F2_9  | 0.5512(4)  | 0.4336(4)  | 0.7346(3)   | 0.091(2)   |
| F3_9  | 0.4637(4)  | 0.4442(3)  | 0.6768(2)   | 0.0666(14) |
| C3_9  | 0.3526(8)  | 0.4568(6)  | 0.7926(4)   | 0.075(3)   |
| F4_9  | 0.2617(5)  | 0.4517(5)  | 0.8206(3)   | 0.117(3)   |
| F5_9  | 0.3368(5)  | 0.5239(3)  | 0.7530(3)   | 0.0821(17) |
| F6_9  | 0.4019(7)  | 0.4647(4)  | 0.8263(3)   | 0.123(3)   |
| C4_9  | 0.4601(6)  | 0.3086(5)  | 0.8126(3)   | 0.0466(18) |
| F7_9  | 0.3928(4)  | 0.3071(4)  | 0.85960(19) | 0.0715(15) |
| F8_9  | 0.5449(3)  | 0.3117(3)  | 0.8227(2)   | 0.0600(13) |
| F9_9  | 0.4887(4)  | 0.2384(3)  | 0.7975(2)   | 0.0657(14) |
| O1_10 | 1.3552(4)  | -0.3218(3) | 0.32571(18) | 0.0398(12) |
| C1_10 | 1.4023(5)  | -0.3106(4) | 0.2725(2)   | 0.0335(14) |
| C2_10 | 1.4420(5)  | -0.3880(4) | 0.2483(3)   | 0.0377(15) |
| F1_10 | 1.3655(4)  | -0.4016(3) | 0.23693(19) | 0.0566(12) |
| F2_10 | 1.5117(3)  | -0.3851(3) | 0.20281(16) | 0.0486(11) |
| F3_10 | 1.4837(4)  | -0.4525(2) | 0.28465(17) | 0.0510(11) |
| C3_10 | 1.4921(6)  | -0.2824(5) | 0.2682(3)   | 0.0521(19) |
| F4_10 | 1.4669(4)  | -0.2289(3) | 0.2988(2)   | 0.0791(18) |
| F5_10 | 1.5723(4)  | -0.3458(3) | 0.2849(2)   | 0.0649(13) |
| F6_10 | 1.5232(4)  | -0.2483(3) | 0.2166(2)   | 0.0704(15) |
| C4_10 | 1.3235(7)  | -0.2428(5) | 0.2384(3)   | 0.064(2)   |
| F7_10 | 1.3096(5)  | -0.1703(3) | 0.2467(2)   | 0.0853(19) |
| F8_10 | 1.3544(5)  | -0.2418(4) | 0.18499(19) | 0.093(2)   |
| F9_10 | 1.2326(4)  | -0.2535(4) | 0.2531(3)   | 0.0886(18) |
| O1_11 | 0.1473(7)  | 0.4060(4)  | 0.7411(3)   | 0.0305(19) |
| C1_11 | 0.0883(6)  | 0.4691(5)  | 0.7080(3)   | 0.0340(19) |
| C2_11 | 0.0441(6)  | 0.4376(5)  | 0.6729(4)   | 0.044(2)   |
| F1_11 | 0.0164(7)  | 0.3752(4)  | 0.7027(4)   | 0.058(2)   |
| F2_11 | -0.0377(6) | 0.4953(4)  | 0.6534(3)   | 0.059(2)   |
| F3_11 | 0.1146(6)  | 0.4125(4)  | 0.6300(3)   | 0.060(2)   |
| C3_11 | 0.1516(7)  | 0.5206(5)  | 0.6697(4)   | 0.048(2)   |
| F4_11 | 0.1665(6)  | 0.5657(5)  | 0.6972(4)   | 0.068(2)   |
| F5_11 | 0.2433(6)  | 0.4745(10) | 0.6476(5)   | 0.059(2)   |
| F6_11 | 0.1057(13) | 0.5720(5)  | 0.6287(4)   | 0.075(3)   |
| C4_11 | -0.0021(6) | 0.5199(5)  | 0.7453(3)   | 0.043(2)   |
| F7_11 | 0.0294(6)  | 0.5310(5)  | 0.7857(3)   | 0.063(2)   |
| F8_11 | -0.0508(5) | 0.5941(4)  | 0.7185(3)   | 0.0624(18) |
| F9_11 | -0.0711(6) | 0.4846(5)  | 0.7691(3)   | 0.056(2)   |
| O1_13 | 1.0521(3)  | -0.1398(3) | 0.73363(17) | 0.0300(10) |
| C1_13 | 1.1185(5)  | -0.1843(4) | 0.7684(2)   | 0.0296(13) |
| C2_13 | 1.0663(6)  | -0.1739(4) | 0.8283(3)   | 0.0427(16) |
| F1_13 | 1.0646(4)  | -0.1053(3) | 0.83748(18) | 0.0566(12) |
| F2_13 | 1.1172(4)  | -0.2343(3) | 0.86506(18) | 0.0626(13) |
| F3_13 | 0.9713(3)  | -0.1734(3) | 0.83859(18) | 0.0570(12) |
| C3_13 | 1.1518(6)  | -0.2748(4) | 0.7645(3)   | 0.0494(18) |
| F4_13 | 1.1707(5)  | -0.2815(3) | 0.7132(2)   | 0.0747(16) |
| F5_13 | 1.0773(4)  | -0.3046(3) | 0.7915(2)   | 0.0670(14) |
| F6_13 | 1.2355(4)  | -0.3202(3) | 0.7858(2)   | 0.0709(15) |
| C4_13 | 1.2151(6)  | -0.1594(4) | 0.7525(3)   | 0.0490(18) |
| F7_13 | 1.2747(4)  | -0.1844(4) | 0.7076(2)   | 0.0743(15) |
| F8_13 | 1.2714(4)  | -0.1895(3) | 0.7919(2)   | 0.0728(16) |
| F9_13 | 1.1879(4)  | -0.0786(3) | 0.7424(2)   | 0.0572(12) |
| O1_14 | 0.8850(4)  | -0.0581(3) | 0.68062(19) | 0.0339(11) |
| C1_14 | 0.8234(5)  | -0.1000(4) | 0.6844(3)   | 0.0401(16) |



|       |            |             |             |            |
|-------|------------|-------------|-------------|------------|
| C2_14 | 0.8870(6)  | -0.1928(5)  | 0.6899(3)   | 0.0522(19) |
| F1_14 | 0.9044(4)  | -0.2269(3)  | 0.7401(2)   | 0.0620(13) |
| F2_14 | 0.8347(4)  | -0.2318(3)  | 0.6782(3)   | 0.0749(16) |
| F3_14 | 0.9752(4)  | -0.2057(3)  | 0.6555(2)   | 0.0632(13) |
| C3_14 | 0.7755(6)  | -0.0690(5)  | 0.6323(3)   | 0.053(2)   |
| F4_14 | 0.7445(4)  | 0.0117(3)   | 0.6191(2)   | 0.0627(13) |
| F5_14 | 0.8446(4)  | -0.0975(4)  | 0.5899(2)   | 0.0706(15) |
| F6_14 | 0.6938(4)  | -0.0895(4)  | 0.6385(2)   | 0.0798(18) |
| C4_14 | 0.7364(6)  | -0.0871(5)  | 0.7351(3)   | 0.0498(19) |
| F7_14 | 0.6659(3)  | -0.0132(3)  | 0.7272(2)   | 0.0608(13) |
| F8_14 | 0.6883(4)  | -0.1418(3)  | 0.7485(2)   | 0.0667(14) |
| F9_14 | 0.7741(3)  | -0.0947(3)  | 0.77911(17) | 0.0540(12) |
| O1_15 | 0.6867(8)  | -0.0979(7)  | 0.3628(4)   | 0.023(2)   |
| C1_15 | 0.7318(14) | -0.1141(9)  | 0.3116(6)   | 0.029(3)   |
| C2_15 | 0.8405(15) | -0.1717(11) | 0.3217(8)   | 0.036(4)   |
| F1_15 | 0.907(3)   | -0.133(2)   | 0.3081(15)  | 0.039(4)   |
| F2_15 | 0.8780(10) | -0.2338(7)  | 0.2955(5)   | 0.047(3)   |
| F3_15 | 0.8291(16) | -0.2029(11) | 0.3754(5)   | 0.044(4)   |
| C3_15 | 0.6801(17) | -0.1628(11) | 0.2955(7)   | 0.037(4)   |
| F4_15 | 0.5786(17) | -0.1289(19) | 0.3061(15)  | 0.038(4)   |
| F5_15 | 0.7039(9)  | -0.2387(6)  | 0.3243(5)   | 0.041(2)   |
| F6_15 | 0.7077(11) | -0.1652(8)  | 0.2423(5)   | 0.047(3)   |
| C4_15 | 0.7282(10) | -0.0362(8)  | 0.2678(5)   | 0.033(2)   |
| F7_15 | 0.6362(7)  | -0.0002(6)  | 0.2528(4)   | 0.036(2)   |
| F8_15 | 0.7994(7)  | -0.0504(7)  | 0.2228(4)   | 0.049(3)   |
| F9_15 | 0.7428(7)  | 0.0177(5)   | 0.2876(4)   | 0.0447(14) |
| O1_16 | 1.2183(4)  | -0.3249(3)  | 0.4259(2)   | 0.0465(13) |
| C1_16 | 1.1650(5)  | -0.2519(4)  | 0.4387(3)   | 0.0399(15) |
| C2_16 | 1.2316(6)  | -0.1965(5)  | 0.4190(4)   | 0.057(2)   |
| F1_16 | 1.3270(4)  | -0.2380(3)  | 0.4239(2)   | 0.0637(13) |
| F2_16 | 1.1966(4)  | -0.1369(4)  | 0.4476(3)   | 0.0832(18) |
| F3_16 | 1.2304(5)  | -0.1606(3)  | 0.3652(2)   | 0.0718(15) |
| C3_16 | 1.0701(6)  | -0.2118(5)  | 0.4113(4)   | 0.064(2)   |
| F4_16 | 0.9977(4)  | -0.2472(3)  | 0.4407(3)   | 0.0776(16) |
| F5_16 | 1.0948(5)  | -0.2238(3)  | 0.3591(2)   | 0.0756(16) |
| F6_16 | 1.0284(4)  | -0.1323(3)  | 0.4082(3)   | 0.0856(19) |
| C4_16 | 1.1326(7)  | -0.2614(7)  | 0.5020(4)   | 0.081(3)   |
| F7_16 | 1.0995(5)  | -0.3261(5)  | 0.5212(2)   | 0.102(2)   |
| F8_16 | 1.0554(5)  | -0.1955(5)  | 0.5162(3)   | 0.116(3)   |
| F9_16 | 1.2123(5)  | -0.2720(5)  | 0.5236(2)   | 0.111(3)   |
| O1_17 | 0.4848(10) | 0.0141(8)   | 0.3683(6)   | 0.027(3)   |
| C1_17 | 0.4003(9)  | 0.0792(7)   | 0.3596(4)   | 0.031(3)   |
| C2_17 | 0.3560(7)  | 0.0703(6)   | 0.3149(4)   | 0.034(2)   |
| F1_17 | 0.4086(9)  | 0.0901(9)   | 0.2647(5)   | 0.075(4)   |
| F2_17 | 0.2593(12) | 0.1213(12)  | 0.3112(7)   | 0.056(4)   |
| F3_17 | 0.3565(11) | -0.0022(6)  | 0.3204(5)   | 0.066(3)   |
| C3_17 | 0.3184(8)  | 0.0833(9)   | 0.4132(4)   | 0.058(3)   |
| F4_17 | 0.3640(7)  | 0.0647(8)   | 0.4562(3)   | 0.069(3)   |
| F5_17 | 0.2794(9)  | 0.0227(9)   | 0.4223(5)   | 0.084(4)   |
| F6_17 | 0.2430(7)  | 0.1500(9)   | 0.4132(5)   | 0.097(4)   |
| C4_17 | 0.4234(9)  | 0.1588(7)   | 0.3427(5)   | 0.055(3)   |
| F7_17 | 0.4340(17) | 0.1811(14)  | 0.3862(8)   | 0.085(4)   |
| F8_17 | 0.3467(9)  | 0.2204(5)   | 0.3195(6)   | 0.095(4)   |
| F9_17 | 0.5099(8)  | 0.1528(7)   | 0.3099(4)   | 0.077(3)   |
| O1_19 | 1.0385(18) | 0.0111(19)  | 0.6573(8)   | 0.022(4)   |

|       |            |             |             |            |
|-------|------------|-------------|-------------|------------|
| C1_19 | 1.0824(11) | 0.0236(8)   | 0.6041(8)   | 0.031(3)   |
| C2_19 | 1.1593(11) | 0.0664(8)   | 0.5998(6)   | 0.048(3)   |
| F1_19 | 1.1100(8)  | 0.1427(5)   | 0.6053(4)   | 0.066(3)   |
| F2_19 | 1.226(2)   | 0.0668(18)  | 0.5529(8)   | 0.075(5)   |
| F3_19 | 1.2144(11) | 0.0290(8)   | 0.6403(6)   | 0.063(4)   |
| C3_19 | 1.1401(10) | -0.0569(8)  | 0.5828(6)   | 0.047(3)   |
| F4_19 | 1.0845(9)  | -0.1046(8)  | 0.6003(6)   | 0.061(3)   |
| F5_19 | 1.2282(7)  | -0.0959(6)  | 0.6023(4)   | 0.067(3)   |
| F6_19 | 1.163(2)   | -0.043(2)   | 0.5284(7)   | 0.065(5)   |
| C4_19 | 1.0023(10) | 0.0807(9)   | 0.5677(6)   | 0.046(3)   |
| F7_19 | 0.9517(7)  | 0.0402(7)   | 0.5580(3)   | 0.064(3)   |
| F8_19 | 1.047(2)   | 0.114(2)    | 0.5197(7)   | 0.076(5)   |
| F9_19 | 0.9340(8)  | 0.1395(6)   | 0.5934(5)   | 0.058(3)   |
| O1_20 | 0.9165(3)  | 0.0083(3)   | 0.76029(17) | 0.0291(10) |
| C1_20 | 0.8704(5)  | 0.0822(4)   | 0.7739(2)   | 0.0356(15) |
| C2_20 | 0.8454(7)  | 0.0692(5)   | 0.8375(3)   | 0.062(2)   |
| F1_20 | 0.9301(4)  | 0.0494(4)   | 0.8578(2)   | 0.0782(17) |
| F2_20 | 0.7751(5)  | 0.1350(4)   | 0.8556(2)   | 0.091(2)   |
| F3_20 | 0.8060(4)  | 0.0100(3)   | 0.85813(19) | 0.0759(16) |
| C3_20 | 0.7715(6)  | 0.1299(4)   | 0.7506(3)   | 0.0478(18) |
| F4_20 | 0.7871(4)  | 0.1243(3)   | 0.69861(17) | 0.0488(11) |
| F5_20 | 0.6963(3)  | 0.1002(3)   | 0.7792(2)   | 0.0643(13) |
| F6_20 | 0.7380(4)  | 0.2097(3)   | 0.7515(2)   | 0.0553(12) |
| C4_20 | 0.9449(6)  | 0.1323(5)   | 0.7533(3)   | 0.0497(18) |
| F7_20 | 0.9433(4)  | 0.1672(3)   | 0.70055(19) | 0.0577(12) |
| F8_20 | 0.9165(4)  | 0.1919(3)   | 0.7815(2)   | 0.0722(16) |
| F9_20 | 1.0393(3)  | 0.0854(3)   | 0.7587(2)   | 0.0584(13) |
| O1_21 | 0.5981(8)  | -0.1198(7)  | 0.4457(4)   | 0.026(2)   |
| C1_21 | 0.5524(11) | -0.1611(8)  | 0.4894(6)   | 0.030(3)   |
| C2_21 | 0.6222(11) | -0.2521(8)  | 0.4999(6)   | 0.045(3)   |
| F1_21 | 0.6179(9)  | -0.2898(6)  | 0.4639(4)   | 0.062(3)   |
| F2_21 | 0.5954(10) | -0.2908(7)  | 0.5501(4)   | 0.054(3)   |
| F3_21 | 0.7178(8)  | -0.2560(7)  | 0.4948(4)   | 0.059(3)   |
| C3_21 | 0.5255(13) | -0.1262(9)  | 0.5406(6)   | 0.047(4)   |
| F4_21 | 0.4870(8)  | -0.0457(6)  | 0.5301(4)   | 0.0598(18) |
| F5_21 | 0.6126(15) | -0.1465(18) | 0.5602(8)   | 0.065(5)   |
| F6_21 | 0.4573(10) | -0.1509(8)  | 0.5822(4)   | 0.065(3)   |
| C4_21 | 0.4647(13) | -0.1750(10) | 0.4744(8)   | 0.042(4)   |
| F7_21 | 0.3750(9)  | -0.1291(8)  | 0.4956(6)   | 0.057(3)   |
| F8_21 | 0.4753(10) | -0.2542(7)  | 0.4959(4)   | 0.055(3)   |
| F9_21 | 0.476(3)   | -0.162(2)   | 0.4205(8)   | 0.062(4)   |
| O1_22 | 0.6212(17) | 0.0447(14)  | 0.4107(9)   | 0.030(3)   |
| C1_22 | 0.6750(9)  | 0.0632(7)   | 0.4376(5)   | 0.038(3)   |
| C2_22 | 0.7849(8)  | 0.0019(7)   | 0.4373(5)   | 0.051(3)   |
| F1_22 | 0.8403(10) | 0.0126(10)  | 0.3876(4)   | 0.087(4)   |
| F2_22 | 0.8348(10) | 0.0059(9)   | 0.4718(7)   | 0.054(4)   |
| F3_22 | 0.7885(8)  | -0.0735(6)  | 0.4466(5)   | 0.062(3)   |
| C3_22 | 0.6178(10) | 0.0684(8)   | 0.4968(5)   | 0.060(3)   |
| F4_22 | 0.5187(6)  | 0.0966(7)   | 0.5014(4)   | 0.078(3)   |
| F5_22 | 0.6463(9)  | -0.0115(6)  | 0.5266(3)   | 0.076(3)   |
| F6_22 | 0.6469(8)  | 0.1085(6)   | 0.5208(4)   | 0.073(3)   |
| C4_22 | 0.6785(10) | 0.1497(8)   | 0.4083(5)   | 0.069(4)   |
| F7_22 | 0.5837(10) | 0.2062(7)   | 0.4246(6)   | 0.091(3)   |
| F8_22 | 0.7458(9)  | 0.1682(6)   | 0.4242(5)   | 0.093(4)   |
| F9_22 | 0.6964(8)  | 0.1590(7)   | 0.3552(4)   | 0.083(3)   |

|       |            |             |              |            |
|-------|------------|-------------|--------------|------------|
| O1_23 | 1.4037(5)  | -0.4525(5)  | 0.4148(3)    | 0.089(2)   |
| C1_23 | 1.4741(5)  | -0.4859(4)  | 0.4475(2)    | 0.0348(14) |
| C2_23 | 1.4250(8)  | -0.4690(5)  | 0.5054(3)    | 0.068(2)   |
| F1_23 | 1.4159(8)  | -0.3945(4)  | 0.5072(2)    | 0.130(3)   |
| F2_23 | 1.4800(6)  | -0.5196(4)  | 0.5425(2)    | 0.0886(19) |
| F3_23 | 1.3310(5)  | -0.4755(4)  | 0.5204(2)    | 0.097(2)   |
| C3_23 | 1.5105(6)  | -0.5791(5)  | 0.4495(3)    | 0.0496(18) |
| F4_23 | 1.5265(5)  | -0.5933(4)  | 0.4007(2)    | 0.090(2)   |
| F5_23 | 1.4428(4)  | -0.6115(3)  | 0.48203(19)  | 0.0707(15) |
| F6_23 | 1.5980(5)  | -0.6177(4)  | 0.4688(3)    | 0.101(2)   |
| C4_23 | 1.5639(7)  | -0.4564(5)  | 0.4233(3)    | 0.058(2)   |
| F7_23 | 1.6226(4)  | -0.4867(3)  | 0.3796(2)    | 0.0697(15) |
| F8_23 | 1.6238(6)  | -0.4749(5)  | 0.4586(3)    | 0.117(3)   |
| F9_23 | 1.5263(6)  | -0.3744(3)  | 0.4081(2)    | 0.096(2)   |
| C1_24 | 0.8363(11) | 0.4837(10)  | 0.5456(7)    | 0.049(3)   |
| C2_24 | 0.9124(10) | 0.4162(11)  | 0.5661(8)    | 0.053(4)   |
| C3_24 | 0.8887(11) | 0.3532(11)  | 0.6037(9)    | 0.055(3)   |
| H3_24 | 0.941747   | 0.305966    | 0.617050     | 0.066      |
| C4_24 | 0.7878(12) | 0.3593(10)  | 0.6217(9)    | 0.057(4)   |
| H4_24 | 0.770488   | 0.317216    | 0.648924     | 0.069      |
| C5_24 | 0.7108(12) | 0.4267(12)  | 0.6004(10)   | 0.066(5)   |
| H5_24 | 0.641082   | 0.429626    | 0.611287     | 0.080      |
| C6_24 | 0.7367(12) | 0.4891(10)  | 0.5633(7)    | 0.062(4)   |
| H6_24 | 0.684114   | 0.536640    | 0.549880     | 0.075      |
| F1_24 | 0.8618(15) | 0.5454(9)   | 0.5099(6)    | 0.075(3)   |
| F2_24 | 1.0094(6)  | 0.4155(6)   | 0.5494(3)    | 0.085(3)   |
| O1_25 | 1.0046(3)  | 0.5529(3)   | 0.03398(16)  | 0.0265(9)  |
| C1_25 | 1.0338(4)  | 0.5285(3)   | -0.0143(2)   | 0.0266(12) |
| C2_25 | 1.0487(5)  | 0.5973(4)   | -0.0633(2)   | 0.0332(14) |
| F1_25 | 0.9590(3)  | 0.6500(2)   | -0.07607(15) | 0.0385(9)  |
| F2_25 | 1.1071(3)  | 0.5700(2)   | -0.10847(15) | 0.0442(10) |
| F3_25 | 1.0946(3)  | 0.6384(2)   | -0.04979(16) | 0.0392(9)  |
| C3_25 | 1.1374(5)  | 0.4562(4)   | -0.0135(2)   | 0.0285(13) |
| F4_25 | 1.1355(3)  | 0.4058(2)   | 0.03502(15)  | 0.0373(9)  |
| F5_25 | 1.2142(3)  | 0.4836(2)   | -0.02043(17) | 0.0411(9)  |
| F6_25 | 1.1595(3)  | 0.4133(2)   | -0.05214(16) | 0.0418(9)  |
| C4_25 | 0.9509(5)  | 0.4995(4)   | -0.0227(3)   | 0.0323(14) |
| F7_25 | 0.9556(3)  | 0.4274(2)   | 0.00928(16)  | 0.0427(10) |
| F8_25 | 0.9638(3)  | 0.4928(2)   | -0.07448(15) | 0.0395(9)  |
| F9_25 | 0.8579(3)  | 0.5519(3)   | -0.00960(17) | 0.0418(9)  |
| C1_26 | 0.1568(6)  | 0.0769(6)   | 0.2283(4)    | 0.046(2)   |
| C2_26 | 0.0921(7)  | 0.1550(6)   | 0.2154(4)    | 0.061(3)   |
| C3_26 | -0.0123(8) | 0.1734(7)   | 0.2271(5)    | 0.084(4)   |
| H3_26 | -0.056810  | 0.227848    | 0.217997     | 0.101      |
| C4_26 | -0.0516(9) | 0.1128(8)   | 0.2519(6)    | 0.080(4)   |
| H4_26 | -0.123908  | 0.125240    | 0.259258     | 0.096      |
| C5_26 | 0.0092(9)  | 0.0366(7)   | 0.2661(6)    | 0.065(3)   |
| H5_26 | -0.019630  | -0.004527   | 0.284471     | 0.078      |
| C6_26 | 0.1156(9)  | 0.0173(6)   | 0.2540(4)    | 0.064(3)   |
| H6_26 | 0.159453   | -0.037270   | 0.263508     | 0.076      |
| F1_26 | 0.2567(4)  | 0.0600(6)   | 0.2160(3)    | 0.101(3)   |
| F2_26 | 0.1336(8)  | 0.2124(6)   | 0.1903(4)    | 0.119(4)   |
| C1_27 | 0.4100(9)  | -0.1634(6)  | 0.8820(4)    | 0.085(3)   |
| C2_27 | 0.5018(10) | -0.1924(7)  | 0.8996(4)    | 0.097(4)   |
| C3_27 | 0.5644(13) | -0.1430(10) | 0.8827(6)    | 0.142(5)   |

|       |            |             |              |            |
|-------|------------|-------------|--------------|------------|
| H3_27 | 0.627526   | -0.160983   | 0.895188     | 0.170      |
| C4_27 | 0.5342(12) | -0.0723(10) | 0.8496(6)    | 0.134(5)   |
| H4_27 | 0.576799   | -0.039842   | 0.836328     | 0.160      |
| C5_27 | 0.4389(12) | -0.0457(9)  | 0.8343(5)    | 0.114(4)   |
| H5_27 | 0.416431   | 0.007448    | 0.812907     | 0.137      |
| C6_27 | 0.3756(10) | -0.0891(6)  | 0.8474(4)    | 0.091(3)   |
| H6_27 | 0.313138   | -0.070410   | 0.834067     | 0.109      |
| F1_27 | 0.3489(8)  | -0.2048(5)  | 0.8978(4)    | 0.145(4)   |
| F2_27 | 0.5396(11) | -0.2617(6)  | 0.9311(4)    | 0.226(7)   |
| O1_28 | 0.862(3)   | 0.7057(12)  | 0.0379(17)   | 0.024(5)   |
| C1_28 | 0.8002(12) | 0.7841(11)  | 0.0266(6)    | 0.028(3)   |
| C2_28 | 0.7327(9)  | 0.7892(7)   | -0.0132(5)   | 0.034(3)   |
| F1_28 | 0.7871(9)  | 0.7894(8)   | -0.0643(4)   | 0.045(3)   |
| F2_28 | 0.6510(7)  | 0.8571(6)   | -0.0156(5)   | 0.044(3)   |
| F3_28 | 0.700(3)   | 0.7264(15)  | 0.0027(11)   | 0.051(4)   |
| C3_28 | 0.7274(10) | 0.8117(7)   | 0.0788(5)    | 0.038(3)   |
| F4_28 | 0.7793(19) | 0.7862(15)  | 0.1207(8)    | 0.046(4)   |
| F5_28 | 0.653(2)   | 0.781(2)    | 0.0963(9)    | 0.052(4)   |
| F6_28 | 0.6844(11) | 0.8930(7)   | 0.0726(6)    | 0.048(3)   |
| C4_28 | 0.8647(11) | 0.8403(8)   | -0.0006(6)   | 0.029(3)   |
| F7_28 | 0.9011(8)  | 0.8556(6)   | 0.0360(5)    | 0.041(2)   |
| F8_28 | 0.812(3)   | 0.9114(12)  | -0.0282(14)  | 0.043(5)   |
| F9_28 | 0.9458(17) | 0.805(2)    | -0.0364(13)  | 0.041(4)   |
| O1_29 | 0.860(2)   | 0.7070(11)  | 0.0434(15)   | 0.031(6)   |
| C1_29 | 0.7988(10) | 0.7860(9)   | 0.0374(5)    | 0.028(3)   |
| C2_29 | 0.6882(8)  | 0.7890(7)   | 0.0401(5)    | 0.040(3)   |
| F1_29 | 0.6461(18) | 0.7681(17)  | 0.0918(8)    | 0.051(4)   |
| F2_29 | 0.6281(7)  | 0.8636(6)   | 0.0195(5)    | 0.059(3)   |
| F3_29 | 0.689(2)   | 0.7389(13)  | 0.0118(9)    | 0.054(4)   |
| C3_29 | 0.8353(9)  | 0.8334(7)   | -0.0194(4)   | 0.035(3)   |
| F4_29 | 0.9366(13) | 0.8152(18)  | -0.0305(11)  | 0.038(3)   |
| F5_29 | 0.8097(8)  | 0.8154(6)   | -0.0594(4)   | 0.044(2)   |
| F6_29 | 0.791(2)   | 0.9137(10)  | -0.0227(12)  | 0.043(5)   |
| C4_29 | 0.8006(9)  | 0.8254(7)   | 0.0828(5)    | 0.040(3)   |
| F7_29 | 0.8823(6)  | 0.8476(5)   | 0.0721(4)    | 0.045(2)   |
| F8_29 | 0.7169(9)  | 0.8913(7)   | 0.0893(5)    | 0.051(3)   |
| F9_29 | 0.8021(16) | 0.7730(12)  | 0.1312(6)    | 0.045(3)   |
| O1_30 | 0.5369(3)  | 1.2603(3)   | 0.03849(16)  | 0.0255(9)  |
| C1_30 | 0.4510(4)  | 1.2405(4)   | 0.0591(2)    | 0.0252(12) |
| C2_30 | 0.3705(5)  | 1.3000(4)   | 0.0965(3)    | 0.0337(14) |
| F1_30 | 0.3953(3)  | 1.2804(3)   | 0.14613(15)  | 0.0442(10) |
| F2_30 | 0.2760(3)  | 1.2968(3)   | 0.10437(17)  | 0.0464(10) |
| F3_30 | 0.3674(3)  | 1.3750(2)   | 0.07467(17)  | 0.0455(10) |
| C3_30 | 0.4048(5)  | 1.2465(4)   | 0.0100(3)    | 0.0346(15) |
| F4_30 | 0.4782(3)  | 1.2133(3)   | -0.03000(16) | 0.0425(10) |
| F5_30 | 0.3582(3)  | 1.3230(2)   | -0.01190(15) | 0.0386(9)  |
| F6_30 | 0.3367(3)  | 1.2078(3)   | 0.02374(17)  | 0.0488(11) |
| C4_30 | 0.4774(5)  | 1.1525(4)   | 0.0929(3)    | 0.0379(15) |
| F7_30 | 0.5215(3)  | 1.0980(2)   | 0.05989(18)  | 0.0466(10) |
| F8_30 | 0.3946(3)  | 1.1369(3)   | 0.12416(18)  | 0.0503(11) |
| F9_30 | 0.5431(3)  | 1.1385(3)   | 0.12508(17)  | 0.0448(10) |
| O1_18 | 1.2607(6)  | -0.4339(5)  | 0.3578(2)    | 0.083(2)   |
| C1_18 | 1.2078(6)  | -0.4832(4)  | 0.3653(3)    | 0.0491(18) |
| C2_18 | 1.1492(7)  | -0.4551(5)  | 0.3171(3)    | 0.062(2)   |
| F1_18 | 1.2131(4)  | -0.4768(3)  | 0.2714(2)    | 0.0671(14) |

|       |            |             |             |            |
|-------|------------|-------------|-------------|------------|
| F2_18 | 1.0756(4)  | -0.4868(4)  | 0.3269(2)   | 0.0781(16) |
| F3_18 | 1.1040(6)  | -0.3754(3)  | 0.3057(3)   | 0.103(2)   |
| C3_18 | 1.1291(7)  | -0.4805(5)  | 0.4198(3)   | 0.057(2)   |
| F4_18 | 1.1724(5)  | -0.4853(4)  | 0.46066(19) | 0.0835(19) |
| F5_18 | 1.0497(5)  | -0.4110(3)  | 0.4172(3)   | 0.0822(17) |
| F6_18 | 1.0917(4)  | -0.5407(3)  | 0.4344(2)   | 0.0600(13) |
| C4_18 | 1.2802(6)  | -0.5718(5)  | 0.3651(3)   | 0.056(2)   |
| F7_18 | 1.3131(4)  | -0.6050(4)  | 0.4127(2)   | 0.0874(19) |
| F8_18 | 1.2371(4)  | -0.6188(3)  | 0.3565(2)   | 0.0682(14) |
| F9_18 | 1.3637(4)  | -0.5748(4)  | 0.3257(2)   | 0.0757(15) |
| O1_31 | 1.036(3)   | 0.008(3)    | 0.6553(11)  | 0.032(7)   |
| C1_31 | 1.0833(13) | 0.0209(10)  | 0.6024(10)  | 0.029(4)   |
| C2_31 | 1.1011(14) | -0.0494(10) | 0.5743(8)   | 0.046(4)   |
| F1_31 | 1.0138(10) | -0.0409(10) | 0.5615(4)   | 0.067(4)   |
| F2_31 | 1.171(3)   | -0.051(3)   | 0.5284(10)  | 0.062(6)   |
| F3_31 | 1.1354(13) | -0.1214(9)  | 0.6073(8)   | 0.058(4)   |
| C3_31 | 1.1887(13) | 0.0276(11)  | 0.6001(8)   | 0.052(4)   |
| F4_31 | 1.1817(17) | 0.0701(11)  | 0.6356(8)   | 0.069(5)   |
| F5_31 | 1.2573(8)  | -0.0445(10) | 0.6146(5)   | 0.073(4)   |
| F6_31 | 1.226(3)   | 0.060(2)    | 0.5499(10)  | 0.068(5)   |
| C4_31 | 1.0157(14) | 0.1025(11)  | 0.5718(9)   | 0.059(5)   |
| F7_31 | 1.0220(14) | 0.1658(6)   | 0.5851(5)   | 0.082(5)   |
| F8_31 | 1.042(3)   | 0.110(3)    | 0.5172(9)   | 0.066(5)   |
| F9_31 | 0.9175(11) | 0.1052(11)  | 0.5848(6)   | 0.074(4)   |
| O1_32 | 0.610(3)   | 0.039(3)    | 0.4194(16)  | 0.039(7)   |
| C1_32 | 0.6737(14) | 0.0707(10)  | 0.4275(6)   | 0.045(4)   |
| C2_32 | 0.7250(15) | 0.0174(13)  | 0.4774(8)   | 0.078(5)   |
| F1_32 | 0.7558(15) | -0.0588(11) | 0.4743(9)   | 0.080(5)   |
| F2_32 | 0.8083(18) | 0.0329(18)  | 0.4756(13)  | 0.067(6)   |
| F3_32 | 0.6494(14) | 0.0355(14)  | 0.5228(7)   | 0.086(4)   |
| C3_32 | 0.6122(15) | 0.1576(12)  | 0.4406(8)   | 0.081(5)   |
| F4_32 | 0.6035(19) | 0.2079(12)  | 0.3900(9)   | 0.103(6)   |
| F5_32 | 0.5242(12) | 0.1589(11)  | 0.4736(7)   | 0.081(5)   |
| F6_32 | 0.6636(14) | 0.1749(14)  | 0.4700(10)  | 0.129(8)   |
| C4_32 | 0.7564(13) | 0.0844(11)  | 0.3765(6)   | 0.058(4)   |
| F7_32 | 0.7157(10) | 0.1101(8)   | 0.3324(4)   | 0.050(3)   |
| F8_32 | 0.7998(10) | 0.1334(8)   | 0.3808(6)   | 0.062(4)   |
| F9_32 | 0.8322(14) | 0.0154(12)  | 0.3671(7)   | 0.069(5)   |
| O1_33 | 0.4658(17) | 0.0108(16)  | 0.3844(10)  | 0.036(6)   |
| C1_33 | 0.3969(14) | 0.0771(11)  | 0.3599(6)   | 0.038(4)   |
| C2_33 | 0.3552(14) | 0.1442(10)  | 0.3938(7)   | 0.064(5)   |
| F1_33 | 0.420(3)   | 0.188(2)    | 0.3782(13)  | 0.083(6)   |
| F2_33 | 0.2642(10) | 0.1996(7)   | 0.3840(6)   | 0.063(4)   |
| F3_33 | 0.3498(11) | 0.1173(8)   | 0.4471(5)   | 0.048(3)   |
| C3_33 | 0.3018(13) | 0.0548(11)  | 0.3613(8)   | 0.068(5)   |
| F4_33 | 0.3336(18) | -0.0165(11) | 0.3474(8)   | 0.070(5)   |
| F5_33 | 0.2468(14) | 0.0535(15)  | 0.4133(8)   | 0.100(6)   |
| F6_33 | 0.246(2)   | 0.109(2)    | 0.3246(11)  | 0.065(7)   |
| C4_33 | 0.4428(12) | 0.1094(10)  | 0.3003(6)   | 0.059(4)   |
| F7_33 | 0.4413(16) | 0.0598(12)  | 0.2699(8)   | 0.077(5)   |
| F8_33 | 0.3879(11) | 0.1877(8)   | 0.2825(5)   | 0.076(5)   |
| F9_33 | 0.5382(9)  | 0.1054(8)   | 0.2977(5)   | 0.052(3)   |
| C1_34 | 0.850(3)   | 0.485(3)    | 0.554(2)    | 0.054(9)   |
| C2_34 | 0.752(3)   | 0.482(2)    | 0.5681(19)  | 0.067(11)  |
| C3_34 | 0.735(4)   | 0.412(3)    | 0.599(3)    | 0.052(8)   |

|       |            |             |             |            |
|-------|------------|-------------|-------------|------------|
| H3_34 | 0.667799   | 0.409858    | 0.609795    | 0.063      |
| C4_34 | 0.819(4)   | 0.345(3)    | 0.615(3)    | 0.054(10)  |
| H4_34 | 0.808712   | 0.296081    | 0.634917    | 0.065      |
| C5_34 | 0.915(4)   | 0.350(3)    | 0.601(3)    | 0.055(3)   |
| H5_34 | 0.971879   | 0.304046    | 0.612308    | 0.066      |
| C6_34 | 0.930(3)   | 0.420(3)    | 0.570(3)    | 0.055(9)   |
| H6_34 | 0.997468   | 0.422804    | 0.560482    | 0.066      |
| F1_34 | 0.860(5)   | 0.554(3)    | 0.523(2)    | 0.085(10)  |
| F2_34 | 0.678(3)   | 0.548(2)    | 0.5494(15)  | 0.125(12)  |
| O1_35 | 0.5638(8)  | -0.0885(6)  | 0.4644(4)   | 0.028(2)   |
| C1_35 | 0.5486(10) | -0.1578(8)  | 0.4953(6)   | 0.033(3)   |
| C2_35 | 0.6520(11) | -0.2283(8)  | 0.4898(5)   | 0.045(3)   |
| F1_35 | 0.6720(8)  | -0.2567(5)  | 0.4436(4)   | 0.061(3)   |
| F2_35 | 0.6556(10) | -0.2929(6)  | 0.5314(4)   | 0.059(3)   |
| F3_35 | 0.7325(7)  | -0.2071(6)  | 0.4881(4)   | 0.057(2)   |
| C3_35 | 0.5161(13) | -0.1480(8)  | 0.5562(6)   | 0.047(3)   |
| F4_35 | 0.4460(8)  | -0.0760(5)  | 0.5608(4)   | 0.0598(18) |
| F5_35 | 0.5960(14) | -0.1552(15) | 0.5769(7)   | 0.056(4)   |
| F6_35 | 0.4750(9)  | -0.2034(7)  | 0.5867(4)   | 0.057(3)   |
| C4_35 | 0.4528(13) | -0.1596(11) | 0.4807(8)   | 0.054(4)   |
| F7_35 | 0.3751(9)  | -0.0874(9)  | 0.4838(6)   | 0.077(4)   |
| F8_35 | 0.4131(10) | -0.2160(9)  | 0.5123(5)   | 0.072(3)   |
| F9_35 | 0.469(3)   | -0.167(2)   | 0.4290(7)   | 0.064(4)   |
| O1_36 | 0.736(3)   | 1.188(3)    | 0.060(2)    | 0.020(9)   |
| C1_36 | 0.820(2)   | 1.1289(16)  | 0.0406(10)  | 0.029(5)   |
| C2_36 | 0.826(2)   | 1.0466(15)  | 0.0804(11)  | 0.039(6)   |
| F1_36 | 0.810(5)   | 1.054(4)    | 0.1323(13)  | 0.049(6)   |
| F2_36 | 0.916(2)   | 0.988(2)    | 0.070(2)    | 0.048(7)   |
| F3_36 | 0.753(2)   | 1.0214(17)  | 0.0760(14)  | 0.058(6)   |
| C3_36 | 0.813(2)   | 1.1263(17)  | -0.0175(10) | 0.037(5)   |
| F4_36 | 0.829(2)   | 1.1901(17)  | -0.0536(11) | 0.054(6)   |
| F5_36 | 0.718(3)   | 1.131(4)    | -0.019(2)   | 0.048(7)   |
| F6_36 | 0.879(3)   | 1.059(2)    | -0.0349(18) | 0.0433(18) |
| C4_36 | 0.9180(19) | 1.1474(16)  | 0.0370(10)  | 0.036(5)   |
| F7_36 | 0.906(5)   | 1.225(2)    | 0.014(2)    | 0.049(7)   |
| F8_36 | 0.999(2)   | 1.101(2)    | 0.0080(12)  | 0.040(6)   |
| F9_36 | 0.936(3)   | 1.135(2)    | 0.0872(11)  | 0.054(6)   |
| O1_37 | 0.601(4)   | 1.316(3)    | 0.1098(17)  | 0.027(8)   |
| C1_37 | 0.6249(16) | 1.3271(12)  | 0.1538(11)  | 0.026(5)   |
| C2_37 | 0.6062(18) | 1.2614(13)  | 0.2044(9)   | 0.043(5)   |
| F1_37 | 0.5064(16) | 1.2792(16)  | 0.2256(8)   | 0.066(6)   |
| F2_37 | 0.650(4)   | 1.257(4)    | 0.2453(16)  | 0.050(6)   |
| F3_37 | 0.642(3)   | 1.1892(17)  | 0.1907(19)  | 0.052(6)   |
| C3_37 | 0.7399(16) | 1.3185(13)  | 0.1403(10)  | 0.038(5)   |
| F4_37 | 0.764(3)   | 1.353(2)    | 0.0881(12)  | 0.053(6)   |
| F5_37 | 0.8009(14) | 1.2413(11)  | 0.1467(9)   | 0.057(5)   |
| F6_37 | 0.764(4)   | 1.354(3)    | 0.171(2)    | 0.040(5)   |
| C4_37 | 0.5563(17) | 1.4131(12)  | 0.1642(9)   | 0.037(5)   |
| F7_37 | 0.590(2)   | 1.4701(11)  | 0.1283(8)   | 0.062(6)   |
| F8_37 | 0.556(5)   | 1.423(3)    | 0.2138(13)  | 0.045(6)   |
| F9_37 | 0.460(2)   | 1.430(2)    | 0.160(2)    | 0.053(6)   |
| O1_38 | 0.152(3)   | 0.3897(17)  | 0.7270(14)  | 0.021(7)   |
| C1_38 | 0.095(2)   | 0.4637(17)  | 0.7025(11)  | 0.040(6)   |
| C2_38 | 0.082(2)   | 0.5318(16)  | 0.7310(12)  | 0.055(7)   |
| F1_38 | 0.064(3)   | 0.508(3)    | 0.7858(12)  | 0.062(7)   |

|         |              |             |            |            |
|---------|--------------|-------------|------------|------------|
| F2_38   | 0.000(3)     | 0.5985(19)  | 0.7191(17) | 0.085(9)   |
| F3_38   | 0.166(3)     | 0.551(3)    | 0.718(2)   | 0.077(7)   |
| C3_38   | 0.148(3)     | 0.482(2)    | 0.6421(11) | 0.058(7)   |
| F4_38   | 0.137(3)     | 0.438(2)    | 0.6129(13) | 0.067(7)   |
| F5_38   | 0.248(3)     | 0.466(5)    | 0.639(3)   | 0.063(8)   |
| F6_38   | 0.109(7)     | 0.560(2)    | 0.619(2)   | 0.074(9)   |
| C4_38   | -0.013(2)    | 0.4630(18)  | 0.7039(12) | 0.052(7)   |
| F7_38   | -0.004(4)    | 0.394(2)    | 0.691(2)   | 0.062(7)   |
| F8_38   | -0.062(3)    | 0.523(2)    | 0.6675(14) | 0.058(7)   |
| F9_38   | -0.070(3)    | 0.467(3)    | 0.7534(13) | 0.055(7)   |
| Mg1_40  | -0.39705(16) | 0.65265(13) | 0.73574(8) | 0.0269(4)  |
| N1_40   | -0.5139(4)   | 0.6397(4)   | 0.8071(2)  | 0.0347(13) |
| C1_40   | -0.5745(5)   | 0.6283(4)   | 0.8438(3)  | 0.0326(15) |
| N2_40   | -0.3166(4)   | 0.5248(4)   | 0.7490(2)  | 0.0330(13) |
| C2_40   | -0.6544(6)   | 0.6160(5)   | 0.8905(3)  | 0.050(2)   |
| H2A_40  | -0.719951    | 0.634732    | 0.877925   | 0.076      |
| H2B_40  | -0.661051    | 0.647010    | 0.917531   | 0.076      |
| H2C_40  | -0.635940    | 0.558171    | 0.907221   | 0.076      |
| N3_40   | -0.3077(4)   | 0.6624(3)   | 0.7868(2)  | 0.0340(13) |
| C3_40   | -0.2593(5)   | 0.6636(4)   | 0.8142(3)  | 0.0340(15) |
| N4_40   | -0.4709(4)   | 0.7828(3)   | 0.7190(2)  | 0.0317(12) |
| C4_40   | -0.1954(7)   | 0.6624(5)   | 0.8509(3)  | 0.050(2)   |
| H4A_40  | -0.125387    | 0.624775    | 0.841922   | 0.075      |
| H4B_40  | -0.224785    | 0.644600    | 0.889068   | 0.075      |
| H4C_40  | -0.193799    | 0.717099    | 0.846097   | 0.075      |
| N5_40   | -0.2822(4)   | 0.6646(3)   | 0.6635(2)  | 0.0331(13) |
| C5_40   | -0.2721(5)   | 0.4563(4)   | 0.7567(3)  | 0.0309(14) |
| N6_40   | -0.4920(4)   | 0.6447(3)   | 0.6870(2)  | 0.0341(13) |
| C7_40   | -0.5072(5)   | 0.8512(4)   | 0.7064(3)  | 0.0318(15) |
| C8_40   | -0.5539(6)   | 0.9387(4)   | 0.6897(3)  | 0.0430(18) |
| H8A_40  | -0.528797    | 0.955221    | 0.650632   | 0.064      |
| H8B_40  | -0.535452    | 0.966108    | 0.711037   | 0.064      |
| H8C_40  | -0.628723    | 0.953705    | 0.696320   | 0.064      |
| C9_40   | -0.2168(5)   | 0.6721(4)   | 0.6269(3)  | 0.0319(15) |
| C10_40  | -0.1354(6)   | 0.6826(5)   | 0.5823(3)  | 0.0467(19) |
| H10A_40 | -0.154290    | 0.739664    | 0.563554   | 0.056      |
| H10B_40 | -0.124302    | 0.648423    | 0.556333   | 0.056      |
| H10C_40 | -0.072181    | 0.666806    | 0.596450   | 0.056      |
| C11_40  | -0.5455(5)   | 0.6463(4)   | 0.6610(3)  | 0.0328(15) |
| C12_40  | -0.6158(7)   | 0.6499(5)   | 0.6285(3)  | 0.051(2)   |
| H12A_40 | -0.647360    | 0.706279    | 0.610568   | 0.076      |
| H12B_40 | -0.669435    | 0.629375    | 0.652451   | 0.076      |
| H12C_40 | -0.578008    | 0.616441    | 0.600655   | 0.076      |
| C6_40   | -0.2162(6)   | 0.3695(4)   | 0.7655(3)  | 0.0402(17) |
| H6A_40  | -0.259312    | 0.341211    | 0.792631   | 0.060      |
| H6B_40  | -0.153314    | 0.357921    | 0.778826   | 0.060      |
| H6C_40  | -0.198275    | 0.350846    | 0.730821   | 0.060      |
| Mg1_41  | 0.94771(16)  | 0.31199(13) | 0.40635(8) | 0.0287(5)  |
| C1_41   | 1.1186(5)    | 0.3356(4)   | 0.2939(3)  | 0.0315(14) |
| N2_41   | 0.8335(4)    | 0.3351(3)   | 0.3593(2)  | 0.0323(12) |
| C2_41   | 1.1956(6)    | 0.3453(5)   | 0.2457(3)  | 0.0450(18) |
| H2A_41  | 1.201912     | 0.310317    | 0.221305   | 0.067      |
| H2B_41  | 1.261854     | 0.329970    | 0.256694   | 0.067      |
| H2C_41  | 1.175147     | 0.402077    | 0.226402   | 0.067      |
| N3_41   | 0.8398(4)    | 0.2877(4)   | 0.4805(2)  | 0.0364(13) |

|         |             |             |            |            |
|---------|-------------|-------------|------------|------------|
| C3_41   | 0.7736(5)   | 0.3492(4)   | 0.3347(2)  | 0.0294(14) |
| N4_41   | 1.0594(4)   | 0.2911(3)   | 0.4540(2)  | 0.0328(12) |
| C4_41   | 0.6967(6)   | 0.3678(5)   | 0.3012(3)  | 0.0436(18) |
| H4A_41  | 0.730934    | 0.363539    | 0.263281   | 0.065      |
| H4B_41  | 0.647990    | 0.423134    | 0.302183   | 0.065      |
| H4C_41  | 0.659760    | 0.329205    | 0.315717   | 0.065      |
| N5_41   | 0.8923(4)   | 0.4402(4)   | 0.4050(2)  | 0.0349(13) |
| C5_41   | 0.7833(5)   | 0.2679(5)   | 0.5152(3)  | 0.0365(16) |
| N6_41   | 0.9997(4)   | 0.1867(4)   | 0.4019(2)  | 0.0353(13) |
| C7_41   | 1.1216(6)   | 0.2814(4)   | 0.4774(3)  | 0.0363(16) |
| C8_41   | 1.2019(7)   | 0.2693(5)   | 0.5055(3)  | 0.051(2)   |
| H8A_41  | 1.263429    | 0.224842    | 0.493857   | 0.076      |
| H8B_41  | 1.178892    | 0.255652    | 0.545142   | 0.076      |
| H8C_41  | 1.218148    | 0.319251    | 0.496619   | 0.076      |
| C9_41   | 0.8630(6)   | 0.5089(5)   | 0.3954(3)  | 0.0383(16) |
| C10_41  | 0.8279(7)   | 0.5969(5)   | 0.3823(4)  | 0.055(2)   |
| H10A_41 | 0.813828    | 0.615893    | 0.344830   | 0.083      |
| H10B_41 | 0.881165    | 0.615607    | 0.385145   | 0.083      |
| H10C_41 | 0.764953    | 0.618785    | 0.408005   | 0.083      |
| C11_41  | 1.0242(5)   | 0.1196(5)   | 0.4019(3)  | 0.0346(15) |
| C12_41  | 1.0554(7)   | 0.0341(5)   | 0.4026(4)  | 0.054(2)   |
| H12A_41 | 1.129683    | 0.012601    | 0.389596   | 0.065      |
| H12B_41 | 1.019388    | 0.026105    | 0.378510   | 0.065      |
| H12C_41 | 1.038297    | 0.005565    | 0.440043   | 0.065      |
| C6_41   | 0.7072(6)   | 0.2436(6)   | 0.5597(3)  | 0.053(2)   |
| H6A_41  | 0.647367    | 0.291784    | 0.566996   | 0.080      |
| H6B_41  | 0.737394    | 0.216652    | 0.592798   | 0.080      |
| H6C_41  | 0.685680    | 0.206015    | 0.549017   | 0.080      |
| N1_41   | 1.0575(4)   | 0.3284(3)   | 0.3322(2)  | 0.0315(12) |
| Mg1_42  | 1.31359(16) | 0.95332(13) | 0.05420(8) | 0.0255(4)  |
| C1_42   | 1.1647(5)   | 1.1429(5)   | 0.0597(3)  | 0.0327(15) |
| N2_42   | 1.4221(4)   | 0.9979(3)   | -0.0089(2) | 0.0304(12) |
| C2_42   | 1.0998(6)   | 1.2272(5)   | 0.0614(4)  | 0.050(2)   |
| H2A_42  | 1.088464    | 1.256645    | 0.024346   | 0.075      |
| H2B_42  | 1.133596    | 1.252595    | 0.075726   | 0.075      |
| H2C_42  | 1.033584    | 1.228857    | 0.085320   | 0.075      |
| N3_42   | 1.4070(4)   | 0.8277(3)   | 0.0531(2)  | 0.0299(12) |
| C3_42   | 1.4839(5)   | 1.0209(4)   | -0.0371(3) | 0.0312(14) |
| N4_42   | 1.1989(4)   | 0.9170(3)   | 0.1177(2)  | 0.0285(12) |
| C4_42   | 1.5639(6)   | 1.0508(5)   | -0.0731(3) | 0.0429(18) |
| H4A_42  | 1.624279    | 1.004776    | -0.083660  | 0.064      |
| H4B_42  | 1.583012    | 1.080599    | -0.053914  | 0.064      |
| H4C_42  | 1.538262    | 1.087057    | -0.106043  | 0.064      |
| N5_42   | 1.2319(4)   | 0.9506(3)   | -0.0039(2) | 0.0290(12) |
| C5_42   | 1.4497(5)   | 0.7587(4)   | 0.0597(3)  | 0.0304(14) |
| N6_42   | 1.3940(4)   | 0.9500(3)   | 0.1145(2)  | 0.0281(12) |
| C6_42   | 1.5010(7)   | 0.6718(5)   | 0.0681(3)  | 0.0476(19) |
| H6A_42  | 1.456100    | 0.645116    | 0.095158   | 0.057      |
| H6B_42  | 1.564824    | 0.657512    | 0.081357   | 0.057      |
| H6C_42  | 1.517032    | 0.653888    | 0.033294   | 0.057      |
| C7_42   | 1.1296(5)   | 0.9046(4)   | 0.1472(3)  | 0.0281(14) |
| C8_42   | 1.0406(5)   | 0.8901(5)   | 0.1842(3)  | 0.0421(17) |
| H8A_42  | 1.000240    | 0.936853    | 0.201898   | 0.063      |
| H8B_42  | 1.063063    | 0.841306    | 0.212201   | 0.063      |
| H8C_42  | 0.998349    | 0.882246    | 0.163593   | 0.063      |



|         |            |             |            |            |
|---------|------------|-------------|------------|------------|
| C9_42   | 1.1799(5)  | 0.9490(4)   | -0.0287(3) | 0.0314(14) |
| C10_42  | 1.1127(6)  | 0.9482(5)   | -0.0619(3) | 0.0440(18) |
| H10A_42 | 1.098830   | 0.998036    | -0.089959  | 0.066      |
| H10B_42 | 1.047901   | 0.945070    | -0.038362  | 0.066      |
| H10C_42 | 1.146437   | 0.900962    | -0.079598  | 0.066      |
| C11_42  | 1.4401(5)  | 0.9461(4)   | 0.1448(3)  | 0.0301(14) |
| C12_42  | 1.4984(6)  | 0.9411(4)   | 0.1849(3)  | 0.0395(17) |
| H12A_42 | 1.568793   | 0.903543    | 0.176877   | 0.059      |
| H12B_42 | 1.465619   | 0.921331    | 0.221823   | 0.059      |
| H12C_42 | 1.499679   | 0.995069    | 0.182948   | 0.059      |
| N1_42   | 1.2160(4)  | 1.0771(3)   | 0.0585(2)  | 0.0299(12) |
| O1_43   | 0.6853(8)  | -0.0620(6)  | 0.3423(4)  | 0.027(2)   |
| C1_43   | 0.7330(12) | -0.1123(8)  | 0.3055(5)  | 0.025(3)   |
| C2_43   | 0.7494(9)  | -0.0595(7)  | 0.2472(5)  | 0.033(2)   |
| F1_43   | 0.7854(6)  | -0.0039(5)  | 0.2484(3)  | 0.0447(14) |
| F2_43   | 0.8159(6)  | -0.1052(6)  | 0.2119(3)  | 0.0402(19) |
| F3_43   | 0.6613(7)  | -0.0213(6)  | 0.2293(4)  | 0.039(2)   |
| C3_43   | 0.6656(14) | -0.1615(9)  | 0.3055(6)  | 0.030(3)   |
| F4_43   | 0.6704(8)  | -0.2219(6)  | 0.3492(4)  | 0.041(2)   |
| F5_43   | 0.5672(13) | -0.1144(16) | 0.3082(13) | 0.033(3)   |
| F6_43   | 0.6933(10) | -0.1938(7)  | 0.2610(4)  | 0.042(2)   |
| C4_43   | 0.8425(13) | -0.1666(10) | 0.3146(7)  | 0.036(4)   |
| F7_43   | 0.8511(13) | -0.2226(9)  | 0.3598(5)  | 0.040(3)   |
| F8_43   | 0.8929(10) | -0.2064(8)  | 0.2725(4)  | 0.056(3)   |
| F9_43   | 0.896(2)   | -0.1215(19) | 0.3150(15) | 0.045(5)   |
| C1_44   | 0.133(4)   | 0.117(4)    | 0.224(3)   | 0.059(11)  |
| C2_44   | 0.032(4)   | 0.167(3)    | 0.231(3)   | 0.067(12)  |
| C3_44   | -0.043(4)  | 0.133(4)    | 0.254(4)   | 0.068(13)  |
| H3_44   | -0.113148  | 0.167767    | 0.258399   | 0.081      |
| C4_44   | -0.019(5)  | 0.051(4)    | 0.270(5)   | 0.052(12)  |
| H4_44   | -0.071483  | 0.028561    | 0.286235   | 0.062      |
| C5_44   | 0.082(6)   | 0.001(4)    | 0.262(4)   | 0.055(11)  |
| H5_44   | 0.099045   | -0.056531   | 0.272237   | 0.066      |
| C6_44   | 0.158(4)   | 0.034(3)    | 0.241(3)   | 0.041(10)  |
| H6_44   | 0.228022   | -0.000174   | 0.237171   | 0.049      |
| F1_44   | 0.206(5)   | 0.149(5)    | 0.201(4)   | 0.12(3)    |
| F2_44   | 0.007(6)   | 0.246(3)    | 0.215(4)   | 0.19(5)    |

Table S 2 Fractional Atomic Coordinates ( $\times 10^4$ ) and Equivalent Isotropic Displacement Parameters ( $\text{\AA}^2 \times 10^3$ ) for  $[\text{CaHMB}(\text{oDFB})_2\{\text{f-a}\}][\text{Al}(\text{OR}^{\text{f}})_4]_2 \cdot 2$ .  $U_{\text{eq}}$  is defined as 1/3 of of the trace of the orthogonalised  $U_{ij}$  tensor.

| Atom  | x          | y          | z          | $U_{\text{eq}}$ |
|-------|------------|------------|------------|-----------------|
| O1_21 | 0.477(3)   | 0.2096(15) | 0.449(3)   | 0.037(2)        |
| C1_21 | 0.4505(12) | 0.1482(12) | 0.4439(10) | 0.038(5)        |
| C2_21 | 0.4404(16) | 0.1295(12) | 0.3692(11) | 0.058(8)        |
| F1_21 | 0.5073(18) | 0.1178(19) | 0.3438(15) | 0.067(9)        |
| F2_21 | 0.395(2)   | 0.0796(17) | 0.3598(18) | 0.102(14)       |
| F3_21 | 0.414(3)   | 0.1781(19) | 0.3309(18) | 0.094(14)       |
| C3_21 | 0.3747(13) | 0.1429(13) | 0.4794(12) | 0.054(7)        |
| F4_21 | 0.383(2)   | 0.175(2)   | 0.5370(17) | 0.073(13)       |
| F5_21 | 0.3184(14) | 0.1692(18) | 0.4424(17) | 0.089(10)       |
| F6_21 | 0.3557(19) | 0.0826(13) | 0.494(2)   | 0.067(11)       |
| C4_21 | 0.5096(15) | 0.1017(14) | 0.4788(12) | 0.062(8)        |
| F7_21 | 0.5029(18) | 0.1016(18) | 0.5452(11) | 0.082(10)       |
| F8_21 | 0.503(3)   | 0.0415(14) | 0.456(2)   | 0.124(15)       |

|         |             |            |            |           |
|---------|-------------|------------|------------|-----------|
| F9_21   | 0.5779(16)  | 0.123(2)   | 0.466(2)   | 0.107(14) |
| C1      | 0.5496(8)   | 0.6800(6)  | 0.1579(7)  | 0.027(3)  |
| C2      | 0.4690(8)   | 0.6757(6)  | 0.1566(7)  | 0.029(3)  |
| C3      | 0.4362(7)   | 0.6364(6)  | 0.2039(7)  | 0.027(3)  |
| C4      | 0.4789(8)   | 0.5998(6)  | 0.2499(7)  | 0.028(3)  |
| C5      | 0.5596(7)   | 0.6028(6)  | 0.2498(6)  | 0.025(3)  |
| C6      | 0.5934(7)   | 0.6443(6)  | 0.2050(6)  | 0.023(3)  |
| C7      | 0.5882(10)  | 0.7232(8)  | 0.1089(8)  | 0.046(4)  |
| H7A     | 0.625637    | 0.697998   | 0.085827   | 0.069     |
| H7B     | 0.613318    | 0.759070   | 0.133194   | 0.069     |
| H7C     | 0.550593    | 0.740573   | 0.076106   | 0.069     |
| C8      | 0.4226(10)  | 0.7155(8)  | 0.1069(9)  | 0.047(4)  |
| H8A     | 0.445714    | 0.714320   | 0.063563   | 0.070     |
| H8B     | 0.420464    | 0.760355   | 0.122630   | 0.070     |
| H8C     | 0.371469    | 0.697739   | 0.102133   | 0.070     |
| C9      | 0.3504(8)   | 0.6398(9)  | 0.2067(10) | 0.054(5)  |
| H9A     | 0.332531    | 0.681969   | 0.189942   | 0.081     |
| H9B     | 0.336349    | 0.634344   | 0.253048   | 0.081     |
| H9C     | 0.327299    | 0.605318   | 0.178986   | 0.081     |
| C10     | 0.4415(10)  | 0.5589(8)  | 0.2999(8)  | 0.049(4)  |
| H10A    | 0.393128    | 0.543110   | 0.280508   | 0.073     |
| H10B    | 0.432811    | 0.584767   | 0.339831   | 0.073     |
| H10C    | 0.473945    | 0.521994   | 0.312318   | 0.073     |
| C11     | 0.6085(10)  | 0.5681(8)  | 0.3024(7)  | 0.046(4)  |
| H11A    | 0.610731    | 0.521934   | 0.291394   | 0.070     |
| H11B    | 0.587080    | 0.573485   | 0.346135   | 0.070     |
| H11C    | 0.659457    | 0.586408   | 0.303726   | 0.070     |
| C12     | 0.6782(8)   | 0.6563(9)  | 0.2097(10) | 0.051(5)  |
| H12A    | 0.704318    | 0.616477   | 0.224074   | 0.076     |
| H12B    | 0.689901    | 0.690771   | 0.242150   | 0.076     |
| H12C    | 0.694791    | 0.669256   | 0.165749   | 0.076     |
| C1_19   | 0.0119(9)   | 0.6802(6)  | 0.6605(6)  | 0.031(3)  |
| C2_19   | -0.0572(7)  | 0.6517(7)  | 0.6748(7)  | 0.028(3)  |
| C3_19   | -0.0571(8)  | 0.6020(7)  | 0.7233(7)  | 0.031(3)  |
| C4_19   | 0.0081(8)   | 0.5799(7)  | 0.7549(6)  | 0.029(3)  |
| C5_19   | 0.0770(7)   | 0.6073(6)  | 0.7401(6)  | 0.023(3)  |
| C6_19   | 0.0790(7)   | 0.6582(7)  | 0.6927(6)  | 0.028(3)  |
| C7_19   | 0.0097(12)  | 0.7359(7)  | 0.6120(8)  | 0.053(5)  |
| H7A_19  | 0.058155    | 0.738945   | 0.590927   | 0.080     |
| H7B_19  | 0.000300    | 0.776272   | 0.635935   | 0.080     |
| H7C_19  | -0.030680   | 0.728861   | 0.577565   | 0.080     |
| C8_19   | -0.1286(10) | 0.6795(10) | 0.6445(10) | 0.062(5)  |
| H8A_19  | -0.129744   | 0.674032   | 0.595867   | 0.093     |
| H8B_19  | -0.131073   | 0.725739   | 0.655293   | 0.093     |
| H8C_19  | -0.171723   | 0.657127   | 0.662440   | 0.093     |
| C9_19   | -0.1324(9)  | 0.5758(9)  | 0.7458(9)  | 0.049(4)  |
| H9A_19  | -0.171744   | 0.583239   | 0.710466   | 0.074     |
| H9B_19  | -0.145821   | 0.598132   | 0.786643   | 0.074     |
| H9C_19  | -0.127754   | 0.529262   | 0.754562   | 0.074     |
| C10_19  | 0.0068(11)  | 0.5277(8)  | 0.8076(9)  | 0.056(5)  |
| H10A_19 | -0.033931   | 0.536446   | 0.837441   | 0.084     |
| H10B_19 | 0.055157    | 0.527144   | 0.833485   | 0.084     |
| H10C_19 | -0.001617   | 0.485536   | 0.785956   | 0.084     |
| C11_19  | 0.1483(8)   | 0.5842(9)  | 0.7784(7)  | 0.043(4)  |
| H11A_19 | 0.191835    | 0.591499   | 0.751342   | 0.064     |

|         |            |           |           |            |
|---------|------------|-----------|-----------|------------|
| H11B_19 | 0.143897   | 0.537838  | 0.788077  | 0.064      |
| H11C_19 | 0.154930   | 0.608263  | 0.820441  | 0.064      |
| C12_19  | 0.1530(9)  | 0.6924(9) | 0.6821(9) | 0.052(5)   |
| H12A_19 | 0.148027   | 0.718570  | 0.641336  | 0.078      |
| H12B_19 | 0.192916   | 0.660148  | 0.677690  | 0.078      |
| H12C_19 | 0.165780   | 0.720442  | 0.720471  | 0.078      |
| C1_18   | 0.7040(6)  | 0.5214(5) | 0.1216(6) | 0.026(3)   |
| C2_18   | 0.6812(5)  | 0.4746(5) | 0.1652(5) | 0.022(2)   |
| C3_18   | 0.7321(6)  | 0.4404(6) | 0.2043(6) | 0.026(3)   |
| H3_18   | 0.715822   | 0.408495  | 0.234599  | 0.031      |
| C4_18   | 0.8082(6)  | 0.4532(6) | 0.1989(6) | 0.029(3)   |
| H4_18   | 0.844844   | 0.429303  | 0.224878  | 0.035      |
| C5_18   | 0.8305(7)  | 0.5005(6) | 0.1558(7) | 0.033(3)   |
| H5_18   | 0.882771   | 0.509114  | 0.152791  | 0.040      |
| C6_18   | 0.7788(6)  | 0.5359(6) | 0.1167(6) | 0.029(3)   |
| H6_18   | 0.794479   | 0.568956  | 0.087567  | 0.034      |
| F1_18   | 0.6482(4)  | 0.5549(4) | 0.0872(3) | 0.0270(16) |
| F2_18   | 0.6042(4)  | 0.4656(4) | 0.1678(4) | 0.0299(17) |
| C1_17   | -0.1142(6) | 0.4485(6) | 0.6394(6) | 0.031(3)   |
| C2_17   | -0.1470(6) | 0.4932(5) | 0.5971(6) | 0.029(3)   |
| C3_17   | -0.2232(7) | 0.4943(7) | 0.5818(7) | 0.044(4)   |
| H3_17   | -0.245582  | 0.525324  | 0.551853  | 0.053      |
| C4_17   | -0.2660(8) | 0.4474(8) | 0.6125(8) | 0.049(4)   |
| H4_17   | -0.318999  | 0.446323  | 0.603641  | 0.059      |
| C5_17   | -0.2324(8) | 0.4024(8) | 0.6559(8) | 0.053(4)   |
| H5_17   | -0.263050  | 0.370968  | 0.675909  | 0.063      |
| C6_17   | -0.1559(7) | 0.4020(7) | 0.6706(7) | 0.039(3)   |
| H6_17   | -0.132907  | 0.371350  | 0.700645  | 0.047      |
| F1_17   | -0.0373(4) | 0.4532(3) | 0.6515(4) | 0.0318(18) |
| F2_17   | -0.1012(4) | 0.5394(4) | 0.5706(4) | 0.0327(18) |
| C1_16   | 0.3815(6)  | 0.4456(6) | 0.1624(6) | 0.031(3)   |
| C2_16   | 0.3429(6)  | 0.4873(6) | 0.1210(6) | 0.035(3)   |
| C3_16   | 0.2663(7)  | 0.4815(7) | 0.1071(7) | 0.047(4)   |
| H3_16   | 0.239744   | 0.510825  | 0.077941  | 0.056      |
| C4_16   | 0.2298(8)  | 0.4311(8) | 0.1374(8) | 0.054(4)   |
| H4_16   | 0.177178   | 0.425145  | 0.128519  | 0.064      |
| C5_16   | 0.2691(7)  | 0.3893(8) | 0.1805(9) | 0.054(4)   |
| H5_16   | 0.242576   | 0.355972  | 0.201908  | 0.065      |
| C6_16   | 0.3461(7)  | 0.3949(7) | 0.1931(8) | 0.045(4)   |
| H6_16   | 0.373317   | 0.365374  | 0.221554  | 0.054      |
| F1_16   | 0.4578(4)  | 0.4559(4) | 0.1733(4) | 0.0307(17) |
| F2_16   | 0.3845(4)  | 0.5367(4) | 0.0944(4) | 0.0318(17) |
| C1_15   | 0.2120(6)  | 0.5254(5) | 0.6252(6) | 0.025(2)   |
| C2_15   | 0.1868(6)  | 0.4737(5) | 0.6615(5) | 0.027(3)   |
| C3_15   | 0.2353(6)  | 0.4382(6) | 0.7024(6) | 0.028(3)   |
| H3_15   | 0.217812   | 0.402728  | 0.727540  | 0.034      |
| C4_15   | 0.3105(6)  | 0.4555(7) | 0.7058(7) | 0.036(3)   |
| H4_15   | 0.345476   | 0.431466  | 0.733457  | 0.043      |
| C5_15   | 0.3356(7)  | 0.5078(6) | 0.6693(7) | 0.035(3)   |
| H5_15   | 0.387440   | 0.519161  | 0.672319  | 0.042      |
| C6_15   | 0.2861(6)  | 0.5431(7) | 0.6287(7) | 0.037(3)   |
| H6_15   | 0.303108   | 0.578956  | 0.603886  | 0.044      |
| F1_15   | 0.1580(4)  | 0.5588(4) | 0.5876(4) | 0.0303(17) |
| F2_15   | 0.1104(4)  | 0.4623(3) | 0.6576(4) | 0.0286(17) |
| O1_14   | 0.0950(5)  | 0.6270(4) | 0.4048(5) | 0.032(2)   |

|       |            |           |            |            |
|-------|------------|-----------|------------|------------|
| C1_14 | 0.1569(6)  | 0.6656(5) | 0.3984(5)  | 0.029(2)   |
| C2_14 | 0.2284(6)  | 0.6225(6) | 0.4079(7)  | 0.044(3)   |
| F1_14 | 0.2352(6)  | 0.5847(5) | 0.3537(5)  | 0.066(3)   |
| F2_14 | 0.2907(4)  | 0.6571(5) | 0.4186(5)  | 0.061(3)   |
| F3_14 | 0.2227(5)  | 0.5826(5) | 0.4608(5)  | 0.056(3)   |
| C3_14 | 0.1586(7)  | 0.7195(6) | 0.4525(6)  | 0.045(3)   |
| F4_14 | 0.0901(5)  | 0.7450(5) | 0.4577(5)  | 0.051(2)   |
| F5_14 | 0.1793(6)  | 0.6938(5) | 0.5128(4)  | 0.064(3)   |
| F6_14 | 0.2062(5)  | 0.7672(4) | 0.4396(5)  | 0.051(2)   |
| C4_14 | 0.1550(6)  | 0.6963(6) | 0.3282(6)  | 0.041(3)   |
| F7_14 | 0.1019(5)  | 0.7432(5) | 0.3248(5)  | 0.058(3)   |
| F8_14 | 0.2207(4)  | 0.7222(5) | 0.3142(4)  | 0.049(2)   |
| F9_14 | 0.1350(6)  | 0.6543(5) | 0.2813(4)  | 0.057(3)   |
| O1_13 | -0.0248(5) | 0.5369(4) | 0.4139(4)  | 0.0251(19) |
| C1_13 | -0.0114(6) | 0.4740(5) | 0.4035(5)  | 0.028(2)   |
| C2_13 | 0.0448(7)  | 0.4473(5) | 0.4590(6)  | 0.034(3)   |
| F1_13 | 0.0217(5)  | 0.4621(4) | 0.5204(4)  | 0.044(2)   |
| F2_13 | 0.0545(6)  | 0.3840(4) | 0.4562(5)  | 0.056(3)   |
| F3_13 | 0.1123(5)  | 0.4743(5) | 0.4547(5)  | 0.056(3)   |
| C3_13 | 0.0224(7)  | 0.4633(6) | 0.3344(6)  | 0.038(3)   |
| F4_13 | -0.0267(5) | 0.4798(5) | 0.2852(4)  | 0.050(2)   |
| F5_13 | 0.0816(6)  | 0.5017(6) | 0.3271(5)  | 0.082(4)   |
| F6_13 | 0.0434(7)  | 0.4032(5) | 0.3234(5)  | 0.074(3)   |
| C4_13 | -0.0871(7) | 0.4373(5) | 0.4050(6)  | 0.036(3)   |
| F7_13 | -0.1405(5) | 0.4668(6) | 0.3682(5)  | 0.068(3)   |
| F8_13 | -0.0832(6) | 0.3775(5) | 0.3811(8)  | 0.099(5)   |
| F9_13 | -0.1117(7) | 0.4352(7) | 0.4651(5)  | 0.086(4)   |
| O1_12 | -0.0584(5) | 0.6683(4) | 0.4282(5)  | 0.032(2)   |
| C1_12 | -0.1157(6) | 0.6897(5) | 0.3877(5)  | 0.030(2)   |
| C2_12 | -0.1911(6) | 0.6712(6) | 0.4182(6)  | 0.039(3)   |
| F1_12 | -0.2005(5) | 0.7053(5) | 0.4746(4)  | 0.054(2)   |
| F2_12 | -0.2509(4) | 0.6818(5) | 0.3775(4)  | 0.048(2)   |
| F3_12 | -0.1908(5) | 0.6091(4) | 0.4367(4)  | 0.050(2)   |
| C3_12 | -0.1159(6) | 0.6604(6) | 0.3169(5)  | 0.031(3)   |
| F4_12 | -0.0450(4) | 0.6552(5) | 0.2984(4)  | 0.046(2)   |
| F5_12 | -0.1450(5) | 0.6010(4) | 0.3140(4)  | 0.043(2)   |
| F6_12 | -0.1543(4) | 0.6956(4) | 0.2710(4)  | 0.0358(19) |
| C4_12 | -0.1100(6) | 0.7642(5) | 0.3829(6)  | 0.038(3)   |
| F7_12 | -0.0538(5) | 0.7808(4) | 0.3445(5)  | 0.051(2)   |
| F8_12 | -0.1723(5) | 0.7928(4) | 0.3576(5)  | 0.052(2)   |
| F9_12 | -0.0933(6) | 0.7896(4) | 0.4429(5)  | 0.056(3)   |
| O1_11 | 0.4861(5)  | 0.5233(4) | -0.0902(5) | 0.036(2)   |
| C1_11 | 0.4858(6)  | 0.4583(5) | -0.0819(5) | 0.028(2)   |
| C2_11 | 0.5143(7)  | 0.4263(6) | -0.1454(6) | 0.038(3)   |
| F1_11 | 0.5890(5)  | 0.4301(6) | -0.1471(5) | 0.073(3)   |
| F2_11 | 0.4967(7)  | 0.3622(5) | -0.1482(5) | 0.070(3)   |
| F3_11 | 0.4841(5)  | 0.4537(4) | -0.2010(4) | 0.043(2)   |
| C3_11 | 0.4032(7)  | 0.4356(6) | -0.0720(6) | 0.040(3)   |
| F4_11 | 0.3712(5)  | 0.4756(5) | -0.0290(4) | 0.057(3)   |
| F5_11 | 0.3617(5)  | 0.4401(5) | -0.1285(4) | 0.050(2)   |
| F6_11 | 0.3995(6)  | 0.3774(5) | -0.0463(6) | 0.064(3)   |
| C4_11 | 0.5366(6)  | 0.4373(5) | -0.0204(6) | 0.033(3)   |
| F7_11 | 0.5060(5)  | 0.4548(4) | 0.0372(4)  | 0.0363(18) |
| F8_11 | 0.5489(5)  | 0.3737(4) | -0.0172(4) | 0.045(2)   |
| F9_11 | 0.6037(4)  | 0.4671(4) | -0.0201(5) | 0.046(2)   |

|       |            |            |            |            |
|-------|------------|------------|------------|------------|
| O1_10 | 0.6064(5)  | 0.6139(5)  | -0.0676(5) | 0.034(2)   |
| C1_10 | 0.6626(6)  | 0.6384(5)  | -0.1047(5) | 0.030(2)   |
| C2_10 | 0.6559(7)  | 0.7131(6)  | -0.1090(6) | 0.043(3)   |
| F1_10 | 0.6027(5)  | 0.7298(5)  | -0.1551(5) | 0.051(2)   |
| F2_10 | 0.7205(5)  | 0.7404(5)  | -0.1257(6) | 0.070(3)   |
| F3_10 | 0.6391(6)  | 0.7379(5)  | -0.0502(5) | 0.066(3)   |
| C3_10 | 0.7379(6)  | 0.6194(6)  | -0.0676(6) | 0.032(3)   |
| F4_10 | 0.7385(4)  | 0.5575(4)  | -0.0496(4) | 0.0411(19) |
| F5_10 | 0.7506(5)  | 0.6535(4)  | -0.0120(4) | 0.045(2)   |
| F6_10 | 0.7968(4)  | 0.6285(5)  | -0.1056(4) | 0.056(3)   |
| C4_10 | 0.6580(7)  | 0.6091(6)  | -0.1755(6) | 0.042(3)   |
| F7_10 | 0.6842(6)  | 0.5483(5)  | -0.1747(5) | 0.064(3)   |
| F8_10 | 0.6982(5)  | 0.6444(6)  | -0.2177(4) | 0.064(3)   |
| F9_10 | 0.5870(5)  | 0.6074(5)  | -0.1999(5) | 0.060(3)   |
| O1_9  | 0.4571(4)  | 0.6592(4)  | -0.0900(4) | 0.028(2)   |
| C1_9  | 0.3935(6)  | 0.6790(5)  | -0.1231(5) | 0.027(2)   |
| C2_9  | 0.3973(6)  | 0.6639(6)  | -0.1988(6) | 0.035(3)   |
| F1_9  | 0.4467(4)  | 0.7033(4)  | -0.2264(4) | 0.042(2)   |
| F2_9  | 0.3316(4)  | 0.6704(5)  | -0.2330(4) | 0.048(2)   |
| F3_9  | 0.4218(5)  | 0.6033(4)  | -0.2079(4) | 0.046(2)   |
| C3_9  | 0.3228(6)  | 0.6463(6)  | -0.0958(6) | 0.035(3)   |
| F4_9  | 0.3302(5)  | 0.6405(5)  | -0.0298(4) | 0.055(3)   |
| F5_9  | 0.3147(5)  | 0.5860(4)  | -0.1195(5) | 0.047(2)   |
| F6_9  | 0.2591(4)  | 0.6778(4)  | -0.1112(4) | 0.042(2)   |
| C4_9  | 0.3870(6)  | 0.7531(5)  | -0.1135(6) | 0.035(3)   |
| F7_9  | 0.3669(5)  | 0.7668(4)  | -0.0520(4) | 0.048(2)   |
| F8_9  | 0.3355(5)  | 0.7803(4)  | -0.1564(4) | 0.048(2)   |
| F9_9  | 0.4519(4)  | 0.7828(4)  | -0.1227(5) | 0.048(2)   |
| O1_8  | 0.3877(5)  | 0.3209(5)  | 0.4377(5)  | 0.041(3)   |
| C1_8  | 0.3329(6)  | 0.3651(6)  | 0.4387(6)  | 0.038(3)   |
| C2_8  | 0.3659(8)  | 0.4306(6)  | 0.4140(7)  | 0.060(4)   |
| F1_8  | 0.3663(7)  | 0.4273(5)  | 0.3460(5)  | 0.072(3)   |
| F2_8  | 0.3249(7)  | 0.4805(5)  | 0.4305(7)  | 0.084(4)   |
| F3_8  | 0.4348(5)  | 0.4416(5)  | 0.4435(5)  | 0.060(3)   |
| C3_8  | 0.3005(7)  | 0.3742(7)  | 0.5093(6)  | 0.052(3)   |
| F4_8  | 0.2956(5)  | 0.3160(5)  | 0.5384(5)  | 0.058(3)   |
| F5_8  | 0.3517(7)  | 0.4101(6)  | 0.5479(6)  | 0.081(3)   |
| F6_8  | 0.2355(6)  | 0.4041(6)  | 0.5080(6)  | 0.079(4)   |
| C4_8  | 0.2662(7)  | 0.3445(7)  | 0.3906(7)  | 0.059(4)   |
| F7_8  | 0.2226(6)  | 0.3021(6)  | 0.4224(7)  | 0.089(4)   |
| F8_8  | 0.2242(6)  | 0.3971(7)  | 0.3718(6)  | 0.092(4)   |
| F9_8  | 0.2916(6)  | 0.3184(5)  | 0.3354(5)  | 0.063(3)   |
| O1_7  | 0.479(2)   | 0.2118(11) | 0.4499(19) | 0.037(2)   |
| C1_7  | 0.4458(10) | 0.1540(9)  | 0.4399(8)  | 0.032(4)   |
| C2_7  | 0.4116(10) | 0.1287(9)  | 0.5045(8)  | 0.032(4)   |
| F1_7  | 0.4642(9)  | 0.1089(10) | 0.5486(8)  | 0.046(5)   |
| F2_7  | 0.3672(17) | 0.0768(12) | 0.4935(13) | 0.075(10)  |
| F3_7  | 0.3722(16) | 0.1736(13) | 0.5340(12) | 0.054(7)   |
| C3_7  | 0.3802(11) | 0.1586(9)  | 0.3859(9)  | 0.049(5)   |
| F4_7  | 0.4005(15) | 0.1961(11) | 0.3358(11) | 0.054(6)   |
| F5_7  | 0.3176(10) | 0.1853(10) | 0.4090(10) | 0.059(5)   |
| F6_7  | 0.3593(15) | 0.1011(9)  | 0.3616(14) | 0.073(7)   |
| C4_7  | 0.5046(11) | 0.1043(8)  | 0.4176(11) | 0.050(5)   |
| F7_7  | 0.5202(18) | 0.1169(17) | 0.3542(12) | 0.093(10)  |
| F8_7  | 0.4800(12) | 0.0436(8)  | 0.4223(15) | 0.088(10)  |

|      |            |            |            |            |
|------|------------|------------|------------|------------|
| F9_7 | 0.5687(10) | 0.1084(10) | 0.4544(13) | 0.053(5)   |
| O1_6 | 0.4689(5)  | 0.3013(5)  | 0.5583(4)  | 0.028(2)   |
| C1_6 | 0.5047(6)  | 0.3078(5)  | 0.6182(5)  | 0.025(2)   |
| C2_6 | 0.4508(7)  | 0.2819(6)  | 0.6710(6)  | 0.038(3)   |
| F1_6 | 0.4434(6)  | 0.2183(4)  | 0.6663(5)  | 0.062(3)   |
| F2_6 | 0.4757(5)  | 0.2954(5)  | 0.7332(4)  | 0.054(2)   |
| F3_6 | 0.3826(4)  | 0.3068(4)  | 0.6625(4)  | 0.047(2)   |
| C3_6 | 0.5245(7)  | 0.3794(5)  | 0.6344(6)  | 0.036(3)   |
| F4_6 | 0.5518(4)  | 0.4078(4)  | 0.5811(4)  | 0.0357(18) |
| F5_6 | 0.4663(5)  | 0.4122(4)  | 0.6542(5)  | 0.050(2)   |
| F6_6 | 0.5781(5)  | 0.3859(5)  | 0.6853(4)  | 0.049(2)   |
| C4_6 | 0.5782(6)  | 0.2683(6)  | 0.6228(6)  | 0.038(3)   |
| F7_6 | 0.6323(4)  | 0.2968(5)  | 0.5903(4)  | 0.049(2)   |
| F8_6 | 0.6060(6)  | 0.2570(6)  | 0.6836(5)  | 0.068(3)   |
| F9_6 | 0.5679(6)  | 0.2109(5)  | 0.5923(6)  | 0.075(3)   |
| O1_5 | 0.5492(4)  | 0.3292(5)  | 0.4463(4)  | 0.028(2)   |
| C1_5 | 0.6001(6)  | 0.3363(5)  | 0.3984(5)  | 0.029(2)   |
| C2_5 | 0.6494(7)  | 0.3957(6)  | 0.4168(6)  | 0.045(3)   |
| F1_5 | 0.6986(5)  | 0.3823(6)  | 0.4685(4)  | 0.065(3)   |
| F2_5 | 0.6894(6)  | 0.4163(5)  | 0.3653(5)  | 0.066(3)   |
| F3_5 | 0.6086(6)  | 0.4448(4)  | 0.4369(5)  | 0.062(3)   |
| C3_5 | 0.5590(6)  | 0.3479(6)  | 0.3289(6)  | 0.033(3)   |
| F4_5 | 0.5019(4)  | 0.3077(4)  | 0.3187(4)  | 0.0376(19) |
| F5_5 | 0.5319(6)  | 0.4082(4)  | 0.3238(5)  | 0.055(2)   |
| F6_5 | 0.6046(5)  | 0.3397(5)  | 0.2781(4)  | 0.048(2)   |
| C4_5 | 0.6507(7)  | 0.2750(6)  | 0.3951(7)  | 0.048(3)   |
| F7_5 | 0.6152(5)  | 0.2277(4)  | 0.3612(5)  | 0.053(2)   |
| F8_5 | 0.7152(5)  | 0.2865(6)  | 0.3660(6)  | 0.072(3)   |
| F9_5 | 0.6686(6)  | 0.2531(6)  | 0.4568(5)  | 0.071(3)   |
| O1_4 | 0.0943(4)  | 0.8274(4)  | 0.0667(4)  | 0.0259(19) |
| C1_4 | 0.1660(5)  | 0.8391(5)  | 0.0884(5)  | 0.022(2)   |
| C2_4 | 0.1911(6)  | 0.7953(5)  | 0.1482(6)  | 0.029(2)   |
| F1_4 | 0.2075(4)  | 0.7349(3)  | 0.1282(4)  | 0.0389(19) |
| F2_4 | 0.2504(4)  | 0.8160(4)  | 0.1850(4)  | 0.040(2)   |
| F3_4 | 0.1339(4)  | 0.7869(4)  | 0.1895(4)  | 0.042(2)   |
| C3_4 | 0.1705(6)  | 0.9116(5)  | 0.1129(6)  | 0.031(3)   |
| F4_4 | 0.1339(4)  | 0.9500(4)  | 0.0693(4)  | 0.0386(19) |
| F5_4 | 0.1397(5)  | 0.9170(4)  | 0.1715(4)  | 0.046(2)   |
| F6_4 | 0.2422(4)  | 0.9312(4)  | 0.1207(5)  | 0.047(2)   |
| C4_4 | 0.2222(6)  | 0.8290(6)  | 0.0323(6)  | 0.032(3)   |
| F7_4 | 0.2165(5)  | 0.8775(4)  | -0.0124(4) | 0.047(2)   |
| F8_4 | 0.2932(4)  | 0.8243(4)  | 0.0563(4)  | 0.042(2)   |
| F9_4 | 0.2041(4)  | 0.7747(4)  | -0.0013(4) | 0.043(2)   |
| O1_3 | 0.0518(5)  | 0.6970(4)  | 0.0599(4)  | 0.0234(18) |
| C1_3 | 0.0457(6)  | 0.6326(5)  | 0.0521(5)  | 0.027(2)   |
| C2_3 | -0.0335(7) | 0.6137(6)  | 0.0244(7)  | 0.048(3)   |
| F1_3 | -0.0835(5) | 0.6206(5)  | 0.0733(7)  | 0.082(4)   |
| F2_3 | -0.0412(5) | 0.5527(4)  | 0.0060(5)  | 0.060(3)   |
| F3_3 | -0.0592(6) | 0.6539(5)  | -0.0228(6) | 0.081(4)   |
| C3_3 | 0.1048(7)  | 0.6082(6)  | 0.0033(6)  | 0.038(3)   |
| F4_3 | 0.1708(5)  | 0.6340(5)  | 0.0167(6)  | 0.065(3)   |
| F5_3 | 0.0835(7)  | 0.6242(6)  | -0.0593(5) | 0.080(4)   |
| F6_3 | 0.1125(6)  | 0.5439(4)  | 0.0043(5)  | 0.057(3)   |
| C4_3 | 0.0612(7)  | 0.5996(6)  | 0.1213(6)  | 0.040(3)   |
| F7_3 | 0.1350(5)  | 0.6015(5)  | 0.1392(5)  | 0.057(2)   |

|      |             |             |              |            |
|------|-------------|-------------|--------------|------------|
| F8_3 | 0.0421(6)   | 0.5375(4)   | 0.1212(5)    | 0.058(3)   |
| F9_3 | 0.0269(7)   | 0.6298(5)   | 0.1686(5)    | 0.069(3)   |
| O1_2 | -0.0587(4)  | 0.7980(4)   | 0.0499(4)    | 0.0236(18) |
| C1_2 | -0.1049(5)  | 0.8249(5)   | 0.0940(5)    | 0.027(2)   |
| C2_2 | -0.1166(6)  | 0.8976(5)   | 0.0775(5)    | 0.029(2)   |
| F1_2 | -0.1619(4)  | 0.9056(4)   | 0.0223(4)    | 0.0394(19) |
| F2_2 | -0.1494(5)  | 0.9294(4)   | 0.1268(4)    | 0.041(2)   |
| F3_2 | -0.0514(4)  | 0.9266(4)   | 0.0673(4)    | 0.0352(18) |
| C3_2 | -0.0715(6)  | 0.8189(6)   | 0.1674(5)    | 0.032(3)   |
| F4_2 | -0.0417(5)  | 0.7608(4)   | 0.1768(4)    | 0.043(2)   |
| F5_2 | -0.0184(4)  | 0.8623(4)   | 0.1805(4)    | 0.0389(19) |
| F6_2 | -0.1250(5)  | 0.8260(4)   | 0.2128(4)    | 0.047(2)   |
| C4_2 | -0.1826(6)  | 0.7896(6)   | 0.0871(6)    | 0.038(3)   |
| F7_2 | -0.1779(5)  | 0.7311(4)   | 0.1149(5)    | 0.053(2)   |
| F8_2 | -0.2373(4)  | 0.8228(5)   | 0.1157(5)    | 0.056(3)   |
| F9_2 | -0.2049(4)  | 0.7814(4)   | 0.0233(5)    | 0.046(2)   |
| O1_1 | 0.0331(4)   | 0.7719(4)   | -0.0559(4)   | 0.0213(17) |
| C1_1 | 0.0154(5)   | 0.8004(5)   | -0.1144(5)   | 0.023(2)   |
| C2_1 | -0.0596(6)  | 0.7728(5)   | -0.1459(5)   | 0.031(3)   |
| F1_1 | -0.0515(5)  | 0.7121(4)   | -0.1668(5)   | 0.051(2)   |
| F2_1 | -0.0885(5)  | 0.8072(5)   | -0.1970(4)   | 0.052(2)   |
| F3_1 | -0.1118(4)  | 0.7710(4)   | -0.1000(4)   | 0.044(2)   |
| C3_1 | 0.0081(6)   | 0.8754(5)   | -0.1075(5)   | 0.027(2)   |
| F4_1 | 0.0630(4)   | 0.8985(4)   | -0.0675(4)   | 0.0328(17) |
| F5_1 | -0.0567(4)  | 0.8913(4)   | -0.0803(4)   | 0.0343(18) |
| F6_1 | 0.0088(5)   | 0.9062(4)   | -0.1663(4)   | 0.0372(19) |
| C4_1 | 0.0802(6)   | 0.7856(5)   | -0.1624(5)   | 0.031(3)   |
| F7_1 | 0.1416(4)   | 0.8194(4)   | -0.1447(4)   | 0.042(2)   |
| F8_1 | 0.0606(5)   | 0.7989(4)   | -0.2258(4)   | 0.044(2)   |
| F9_1 | 0.0984(5)   | 0.7230(4)   | -0.1604(4)   | 0.043(2)   |
| Ca1  | 0.51794(13) | 0.55035(12) | 0.12317(12)  | 0.0207(5)  |
| F1   | 0.5079(4)   | 0.5939(4)   | 0.0240(3)    | 0.0280(16) |
| Ca2  | 0.02650(13) | 0.55145(12) | 0.61621(12)  | 0.0203(5)  |
| Al4  | 0.02991(19) | 0.77371(16) | 0.03038(17)  | 0.0176(7)  |
| Al1  | 0.51407(19) | 0.59805(17) | -0.06099(18) | 0.0193(7)  |
| Al2  | 0.01141(19) | 0.61117(18) | 0.43743(18)  | 0.0197(8)  |
| Al3  | 0.47093(19) | 0.29039(18) | 0.47271(19)  | 0.0210(8)  |
| F2   | 0.0269(4)   | 0.6061(4)   | 0.5225(3)    | 0.0265(16) |

Table S 3 Fractional Atomic Coordinates ( $\times 10^4$ ) and Equivalent Isotropic Displacement Parameters ( $\text{\AA}^2 \times 10^3$ ) for [CaHMB(oDFB)<sub>2</sub>{f-al}][al-f-al] **3**.  $U_{eq}$  is defined as 1/3 of the trace of the orthogonalised  $U_{ij}$  tensor.

| Atom  | x          | y          | z          | $U_{eq}$ |
|-------|------------|------------|------------|----------|
| O1_11 | 0.7283(14) | 0.7087(13) | 0.6531(12) | 0.047(5) |
| C1_11 | 0.7224(6)  | 0.6622(8)  | 0.6963(7)  | 0.039(3) |
| C2_11 | 0.7134(8)  | 0.5874(8)  | 0.6660(8)  | 0.043(4) |
| F1_11 | 0.7707(7)  | 0.5731(10) | 0.6704(8)  | 0.070(3) |
| F2_11 | 0.6942(7)  | 0.5392(10) | 0.6945(9)  | 0.055(3) |
| F3_11 | 0.6709(8)  | 0.5825(10) | 0.6017(7)  | 0.084(4) |
| C3_11 | 0.6674(7)  | 0.6824(7)  | 0.7112(8)  | 0.055(3) |
| F4_11 | 0.6792(10) | 0.7465(7)  | 0.7401(9)  | 0.097(4) |
| F5_11 | 0.6120(6)  | 0.6886(8)  | 0.6559(8)  | 0.071(3) |

|         |             |             |             |            |
|---------|-------------|-------------|-------------|------------|
| F6_11   | 0.6602(11)  | 0.6381(6)   | 0.7525(10)  | 0.105(6)   |
| C4_11   | 0.7870(8)   | 0.6585(9)   | 0.7637(8)   | 0.079(4)   |
| F7_11   | 0.7987(13)  | 0.7198(10)  | 0.7932(10)  | 0.133(6)   |
| F8_11   | 0.7857(8)   | 0.6061(9)   | 0.8015(6)   | 0.119(6)   |
| F9_11   | 0.8326(6)   | 0.6431(10)  | 0.7480(8)   | 0.105(4)   |
| C1_18   | 0.74214(14) | 0.79405(14) | 0.43383(14) | 0.0279(6)  |
| C2_18   | 0.79756(13) | 0.75160(14) | 0.45377(13) | 0.0262(5)  |
| C3_18   | 0.79074(12) | 0.68006(14) | 0.43589(13) | 0.0240(5)  |
| C4_18   | 0.72885(13) | 0.65006(14) | 0.39713(13) | 0.0262(5)  |
| C5_18   | 0.67362(13) | 0.69362(17) | 0.37571(14) | 0.0307(6)  |
| C6_18   | 0.68029(14) | 0.76479(16) | 0.39479(14) | 0.0319(6)  |
| C7_18   | 0.7497(2)   | 0.87196(16) | 0.45262(19) | 0.0475(9)  |
| H7A_18  | 0.757123    | 0.898920    | 0.419669    | 0.071      |
| H7B_18  | 0.786747    | 0.878161    | 0.497698    | 0.071      |
| H7C_18  | 0.710250    | 0.889045    | 0.452626    | 0.071      |
| C8_18   | 0.86450(16) | 0.7839(2)   | 0.49073(17) | 0.0437(8)  |
| H8A_18  | 0.891959    | 0.764360    | 0.472756    | 0.066      |
| H8B_18  | 0.883559    | 0.772991    | 0.538985    | 0.066      |
| H8C_18  | 0.861336    | 0.835315    | 0.484399    | 0.066      |
| C9_18   | 0.85067(15) | 0.63528(19) | 0.45562(17) | 0.0409(7)  |
| H9A_18  | 0.839015    | 0.585100    | 0.452074    | 0.061      |
| H9B_18  | 0.882866    | 0.646129    | 0.502217    | 0.061      |
| H9C_18  | 0.868904    | 0.645633    | 0.425325    | 0.061      |
| C10_18  | 0.72190(19) | 0.57297(17) | 0.37610(18) | 0.0424(8)  |
| H10A_18 | 0.724407    | 0.568721    | 0.333966    | 0.064      |
| H10B_18 | 0.679947    | 0.555037    | 0.369192    | 0.064      |
| H10C_18 | 0.756843    | 0.545350    | 0.411556    | 0.064      |
| C11_18  | 0.60680(15) | 0.6654(3)   | 0.32872(17) | 0.0529(10) |
| H11A_18 | 0.590605    | 0.687708    | 0.284307    | 0.079      |
| H11B_18 | 0.577414    | 0.676103    | 0.347245    | 0.079      |
| H11C_18 | 0.609068    | 0.614065    | 0.324135    | 0.079      |
| C12_18  | 0.6209(2)   | 0.8114(3)   | 0.3703(2)   | 0.0665(12) |
| H12A_18 | 0.606848    | 0.825559    | 0.323473    | 0.100      |
| H12B_18 | 0.631399    | 0.853596    | 0.398845    | 0.100      |
| H12C_18 | 0.585962    | 0.785147    | 0.372687    | 0.100      |
| C1_17   | 0.57126(13) | 0.64639(14) | 0.46613(14) | 0.0273(5)  |
| C2_17   | 0.59460(13) | 0.58246(15) | 0.45858(15) | 0.0298(6)  |
| C3_17   | 0.55533(15) | 0.52459(16) | 0.43230(17) | 0.0370(7)  |
| H3_17   | 0.571879    | 0.480726    | 0.426541    | 0.044      |
| C4_17   | 0.49022(15) | 0.53288(18) | 0.41443(16) | 0.0381(7)  |
| H4_17   | 0.461548    | 0.493841    | 0.396426    | 0.046      |
| C5_17   | 0.46661(14) | 0.59729(18) | 0.42251(16) | 0.0379(7)  |
| H5_17   | 0.421962    | 0.601786    | 0.410056    | 0.045      |
| C6_17   | 0.50732(13) | 0.65549(17) | 0.44861(15) | 0.0322(6)  |
| H6_17   | 0.491313    | 0.699854    | 0.454050    | 0.039      |
| F1_17   | 0.61555(8)  | 0.70063(8)  | 0.49184(9)  | 0.0338(4)  |
| F2_17   | 0.65995(8)  | 0.57949(9)  | 0.47833(10) | 0.0361(4)  |
| C1_16   | 0.87975(13) | 0.62880(14) | 0.63161(13) | 0.0261(5)  |
| C2_16   | 0.85170(12) | 0.56631(14) | 0.60096(13) | 0.0246(5)  |
| C3_16   | 0.88350(14) | 0.50299(15) | 0.62158(14) | 0.0297(6)  |
| H3_16   | 0.863540    | 0.459806    | 0.600296    | 0.036      |
| C4_16   | 0.94600(14) | 0.50465(16) | 0.67477(15) | 0.0323(6)  |
| H4_16   | 0.969440    | 0.461692    | 0.690471    | 0.039      |
| C5_16   | 0.97478(14) | 0.56730(17) | 0.70532(15) | 0.0335(6)  |
| H5_16   | 1.017870    | 0.566815    | 0.741466    | 0.040      |



|       |             |             |             |           |
|-------|-------------|-------------|-------------|-----------|
| C6_16 | 0.94200(13) | 0.63153(16) | 0.68431(14) | 0.0311(6) |
| H6_16 | 0.961611    | 0.674961    | 0.705268    | 0.037     |
| F1_16 | 0.84255(8)  | 0.68889(8)  | 0.60703(9)  | 0.0329(4) |
| F2_16 | 0.78933(8)  | 0.57044(8)  | 0.54842(8)  | 0.0290(3) |
| O1_14 | 0.6427(13)  | 0.2214(13)  | 0.8066(13)  | 0.028(5)  |
| C1_14 | 0.6370(7)   | 0.1731(8)   | 0.7598(7)   | 0.036(4)  |
| C2_14 | 0.6184(8)   | 0.2084(8)   | 0.6903(8)   | 0.060(3)  |
| F1_14 | 0.5538(8)   | 0.2206(10)  | 0.6648(9)   | 0.0541(7) |
| F2_14 | 0.6399(11)  | 0.1627(8)   | 0.6578(8)   | 0.070(5)  |
| F3_14 | 0.6570(9)   | 0.2639(7)   | 0.6989(7)   | 0.051(4)  |
| C3_14 | 0.7003(8)   | 0.1301(9)   | 0.7842(9)   | 0.053(4)  |
| F4_14 | 0.7248(14)  | 0.1217(17)  | 0.8507(10)  | 0.046(5)  |
| F5_14 | 0.7431(10)  | 0.1683(13)  | 0.7737(13)  | 0.064(4)  |
| F6_14 | 0.6910(16)  | 0.0686(10)  | 0.7531(16)  | 0.041(5)  |
| C4_14 | 0.5805(7)   | 0.1213(8)   | 0.7478(8)   | 0.052(4)  |
| F7_14 | 0.6019(11)  | 0.0741(13)  | 0.7962(13)  | 0.058(5)  |
| F8_14 | 0.5570(8)   | 0.0930(11)  | 0.6864(9)   | 0.069(5)  |
| F9_14 | 0.5329(6)   | 0.1597(8)   | 0.7462(8)   | 0.041(3)  |
| O1_13 | 0.8494(8)   | 0.3298(10)  | 0.8528(9)   | 0.0324(6) |
| C1_13 | 0.8800(8)   | 0.3610(8)   | 0.8210(8)   | 0.045(4)  |
| C2_13 | 0.8470(9)   | 0.3372(11)  | 0.7465(8)   | 0.066(5)  |
| F1_13 | 0.7896(11)  | 0.3678(17)  | 0.7108(14)  | 0.074(5)  |
| F2_13 | 0.8793(13)  | 0.3555(16)  | 0.7138(14)  | 0.072(4)  |
| F3_13 | 0.8333(14)  | 0.2692(11)  | 0.7403(12)  | 0.066(5)  |
| C3_13 | 0.9537(8)   | 0.3460(10)  | 0.8557(9)   | 0.052(4)  |
| F4_13 | 0.9775(10)  | 0.3370(16)  | 0.9222(9)   | 0.061(4)  |
| F5_13 | 0.9668(11)  | 0.2871(10)  | 0.8317(12)  | 0.086(5)  |
| F6_13 | 0.9898(13)  | 0.3966(14)  | 0.8494(15)  | 0.064(5)  |
| C4_13 | 0.8708(9)   | 0.4420(8)   | 0.8249(9)   | 0.061(4)  |
| F7_13 | 0.9091(10)  | 0.4638(10)  | 0.8868(9)   | 0.069(4)  |
| F8_13 | 0.8847(14)  | 0.4753(14)  | 0.7815(12)  | 0.078(5)  |
| F9_13 | 0.8116(10)  | 0.4599(13)  | 0.8116(15)  | 0.066(5)  |
| O1_12 | 0.6621(10)  | 0.8460(14)  | 0.6241(14)  | 0.042(6)  |
| C1_12 | 0.6047(8)   | 0.8796(8)   | 0.5890(7)   | 0.033(4)  |
| C2_12 | 0.5957(8)   | 0.9025(9)   | 0.5192(7)   | 0.054(4)  |
| F1_12 | 0.5849(10)  | 0.8499(11)  | 0.4782(9)   | 0.080(4)  |
| F2_12 | 0.5477(10)  | 0.9486(10)  | 0.4884(8)   | 0.088(7)  |
| F3_12 | 0.6531(11)  | 0.9263(18)  | 0.5270(16)  | 0.085(5)  |
| C3_12 | 0.6050(8)   | 0.9494(8)   | 0.6265(8)   | 0.057(4)  |
| F4_12 | 0.6236(11)  | 0.9352(10)  | 0.6909(8)   | 0.062(4)  |
| F5_12 | 0.6462(10)  | 0.9945(9)   | 0.6200(11)  | 0.076(4)  |
| F6_12 | 0.5445(8)   | 0.9742(9)   | 0.6017(9)   | 0.050(3)  |
| C4_12 | 0.5460(7)   | 0.8344(8)   | 0.5808(9)   | 0.055(4)  |
| F7_12 | 0.5459(11)  | 0.8295(10)  | 0.6391(10)  | 0.063(4)  |
| F8_12 | 0.4915(7)   | 0.8620(11)  | 0.5323(10)  | 0.088(6)  |
| F9_12 | 0.5483(8)   | 0.7703(7)   | 0.5590(9)   | 0.054(3)  |
| O1_10 | 0.8934(12)  | 0.3298(10)  | 0.9882(9)   | 0.047(4)  |
| C1_10 | 0.8955(5)   | 0.3708(6)   | 1.0387(6)   | 0.042(3)  |
| C2_10 | 0.9545(6)   | 0.4211(6)   | 1.0646(6)   | 0.065(3)  |
| F1_10 | 0.9435(7)   | 0.4764(7)   | 1.0253(6)   | 0.085(3)  |
| F2_10 | 0.9688(7)   | 0.4463(9)   | 1.1255(7)   | 0.069(4)  |
| F3_10 | 1.0063(9)   | 0.3879(13)  | 1.0687(12)  | 0.077(4)  |
| C3_10 | 0.9034(5)   | 0.3203(5)   | 1.0960(5)   | 0.055(2)  |
| F4_10 | 0.8632(9)   | 0.2665(8)   | 1.0742(10)  | 0.072(4)  |
| F5_10 | 0.9629(4)   | 0.2950(6)   | 1.1296(5)   | 0.074(3)  |

|       |             |             |             |            |
|-------|-------------|-------------|-------------|------------|
| F6_10 | 0.8896(8)   | 0.3528(8)   | 1.1404(6)   | 0.069(3)   |
| C4_10 | 0.8313(5)   | 0.4131(5)   | 1.0143(5)   | 0.055(3)   |
| F7_10 | 0.7838(7)   | 0.3706(11)  | 1.0096(13)  | 0.068(3)   |
| F8_10 | 0.8376(5)   | 0.4653(5)   | 1.0561(5)   | 0.075(3)   |
| F9_10 | 0.8135(8)   | 0.4393(10)  | 0.9537(7)   | 0.070(4)   |
| O1_9  | 0.78639(10) | 0.84656(12) | 0.69492(10) | 0.0371(5)  |
| C1_9  | 0.84576(13) | 0.87657(16) | 0.72294(14) | 0.0316(6)  |
| C2_9  | 0.89789(16) | 0.8215(2)   | 0.76711(18) | 0.0489(9)  |
| F1_9  | 0.89649(12) | 0.81046(12) | 0.82462(10) | 0.0593(6)  |
| F2_9  | 0.95719(10) | 0.84200(16) | 0.78131(14) | 0.0743(8)  |
| F3_9  | 0.88533(12) | 0.75981(13) | 0.73487(13) | 0.0688(7)  |
| C3_9  | 0.86132(18) | 0.9051(2)   | 0.66744(18) | 0.0539(10) |
| F4_9  | 0.80917(13) | 0.93670(16) | 0.61893(11) | 0.0733(8)  |
| F5_9  | 0.87670(12) | 0.85301(17) | 0.63884(13) | 0.0791(9)  |
| F6_9  | 0.91045(12) | 0.95044(16) | 0.69177(12) | 0.0734(8)  |
| C4_9  | 0.84736(16) | 0.93915(17) | 0.76799(17) | 0.0401(7)  |
| F7_9  | 0.81767(13) | 0.99596(12) | 0.73114(13) | 0.0657(6)  |
| F8_9  | 0.90707(10) | 0.95847(11) | 0.81175(10) | 0.0488(5)  |
| F9_9  | 0.81717(11) | 0.92192(12) | 0.80290(11) | 0.0563(6)  |
| O1_8  | 0.64963(16) | 0.8334(2)   | 0.6105(2)   | 0.0274(8)  |
| C1_8  | 0.60991(18) | 0.8912(2)   | 0.59086(19) | 0.0283(8)  |
| C2_8  | 0.5482(2)   | 0.8712(2)   | 0.5259(2)   | 0.0512(11) |
| F1_8  | 0.55898(19) | 0.8684(2)   | 0.47395(16) | 0.0824(11) |
| F2_8  | 0.49929(14) | 0.91507(18) | 0.51181(18) | 0.0802(11) |
| F3_8  | 0.52786(13) | 0.80655(17) | 0.52966(18) | 0.0696(10) |
| C3_8  | 0.59062(19) | 0.90741(19) | 0.6467(2)   | 0.0419(9)  |
| F4_8  | 0.64442(18) | 0.90579(18) | 0.70716(14) | 0.0595(9)  |
| F5_8  | 0.55084(18) | 0.85794(15) | 0.64818(19) | 0.0559(8)  |
| F6_8  | 0.56230(17) | 0.96913(16) | 0.6388(2)   | 0.0607(9)  |
| C4_8  | 0.64335(19) | 0.9569(2)   | 0.5802(2)   | 0.0419(9)  |
| F7_8  | 0.68453(13) | 0.98548(13) | 0.63830(16) | 0.0524(7)  |
| F8_8  | 0.60076(15) | 1.00587(15) | 0.54291(17) | 0.0694(9)  |
| F9_8  | 0.6760(2)   | 0.9368(2)   | 0.5481(2)   | 0.0731(12) |
| O1_7  | 0.7200(5)   | 0.7081(4)   | 0.6456(4)   | 0.0235(11) |
| C1_7  | 0.7078(3)   | 0.6642(3)   | 0.6874(3)   | 0.0301(11) |
| C2_7  | 0.6387(4)   | 0.6774(3)   | 0.6796(4)   | 0.0535(18) |
| F1_7  | 0.6392(4)   | 0.7367(2)   | 0.7119(4)   | 0.089(2)   |
| F2_7  | 0.6190(3)   | 0.6253(2)   | 0.7032(4)   | 0.0785(17) |
| F3_7  | 0.5961(2)   | 0.6887(2)   | 0.6153(3)   | 0.0716(14) |
| C3_7  | 0.7077(3)   | 0.5877(3)   | 0.6633(3)   | 0.0327(14) |
| F4_7  | 0.7523(3)   | 0.5791(3)   | 0.6433(3)   | 0.0590(15) |
| F5_7  | 0.6517(2)   | 0.5748(3)   | 0.6087(2)   | 0.0533(11) |
| F6_7  | 0.7181(2)   | 0.5392(3)   | 0.7097(3)   | 0.0409(11) |
| C4_7  | 0.7593(4)   | 0.6730(3)   | 0.7609(3)   | 0.069(2)   |
| F7_7  | 0.8160(3)   | 0.6470(3)   | 0.7722(3)   | 0.096(2)   |
| F8_7  | 0.7417(4)   | 0.6408(3)   | 0.8029(2)   | 0.106(3)   |
| F9_7  | 0.7676(5)   | 0.7406(3)   | 0.7780(3)   | 0.109(3)   |
| O1_6  | 0.86436(13) | 0.30380(14) | 0.84474(12) | 0.0324(6)  |
| C1_6  | 0.88506(18) | 0.34861(19) | 0.81145(18) | 0.0318(7)  |
| C2_6  | 0.89304(19) | 0.3038(2)   | 0.75799(19) | 0.0408(8)  |
| F1_6  | 0.94737(13) | 0.26601(14) | 0.78670(15) | 0.0551(7)  |
| F2_6  | 0.89724(18) | 0.3443(2)   | 0.71138(19) | 0.0572(8)  |
| F3_6  | 0.84584(17) | 0.25926(17) | 0.72681(16) | 0.0525(8)  |
| C3_6  | 0.8341(2)   | 0.4078(2)   | 0.7750(2)   | 0.0474(10) |
| F4_6  | 0.81289(17) | 0.43202(19) | 0.8164(2)   | 0.0612(10) |

|      |             |             |             |            |
|------|-------------|-------------|-------------|------------|
| F5_6 | 0.78280(18) | 0.3821(3)   | 0.72165(19) | 0.0655(10) |
| F6_6 | 0.85798(18) | 0.46104(17) | 0.75529(18) | 0.0656(10) |
| C4_6 | 0.95015(19) | 0.3830(2)   | 0.8607(2)   | 0.0423(9)  |
| F7_6 | 0.94219(14) | 0.43592(13) | 0.89476(14) | 0.0508(6)  |
| F8_6 | 0.9813(2)   | 0.4084(2)   | 0.8276(2)   | 0.0609(10) |
| F9_6 | 0.98911(14) | 0.3370(2)   | 0.90585(16) | 0.0538(8)  |
| O1_5 | 0.87471(9)  | 0.19395(10) | 0.93260(10) | 0.0310(4)  |
| C1_5 | 0.91651(11) | 0.13937(13) | 0.95272(13) | 0.0224(5)  |
| C2_5 | 0.96937(13) | 0.15057(15) | 1.02704(14) | 0.0295(6)  |
| F1_5 | 0.94346(9)  | 0.14550(12) | 1.06853(9)  | 0.0436(5)  |
| F2_5 | 1.01731(8)  | 0.10367(9)  | 1.04723(9)  | 0.0362(4)  |
| F3_5 | 0.99547(9)  | 0.21420(10) | 1.03487(9)  | 0.0404(4)  |
| C3_5 | 0.94901(13) | 0.13028(16) | 0.90684(14) | 0.0309(6)  |
| F4_5 | 0.90566(9)  | 0.13449(11) | 0.84234(8)  | 0.0399(4)  |
| F5_5 | 0.99200(9)  | 0.18266(12) | 0.91947(10) | 0.0461(5)  |
| F6_5 | 0.97984(10) | 0.06903(11) | 0.91717(10) | 0.0458(5)  |
| C4_5 | 0.87759(13) | 0.07121(15) | 0.94813(15) | 0.0310(6)  |
| F7_5 | 0.84254(8)  | 0.05058(9)  | 0.88475(9)  | 0.0367(4)  |
| F8_5 | 0.91659(9)  | 0.01799(10) | 0.98334(12) | 0.0507(5)  |
| F9_5 | 0.83710(9)  | 0.08143(11) | 0.97305(9)  | 0.0432(4)  |
| O1_4 | 0.8972(6)   | 0.3403(5)   | 0.9781(4)   | 0.0293(12) |
| C1_4 | 0.9032(3)   | 0.3784(3)   | 1.0317(3)   | 0.0321(12) |
| C2_4 | 0.8820(3)   | 0.4556(3)   | 1.0071(2)   | 0.0440(12) |
| F1_4 | 0.9269(3)   | 0.4899(2)   | 0.9994(2)   | 0.0565(12) |
| F2_4 | 0.8698(2)   | 0.4927(2)   | 1.05056(18) | 0.0582(10) |
| F3_4 | 0.8293(3)   | 0.4567(4)   | 0.9485(3)   | 0.0582(16) |
| C3_4 | 0.8593(3)   | 0.3484(3)   | 1.0603(3)   | 0.0451(12) |
| F4_4 | 0.8633(4)   | 0.2780(4)   | 1.0616(4)   | 0.0580(15) |
| F5_4 | 0.7971(3)   | 0.3646(6)   | 1.0190(5)   | 0.0620(17) |
| F6_4 | 0.8749(3)   | 0.3728(4)   | 1.1212(3)   | 0.0576(15) |
| C4_4 | 0.9746(2)   | 0.3782(3)   | 1.0880(2)   | 0.0402(11) |
| F7_4 | 0.9884(2)   | 0.3187(2)   | 1.1232(2)   | 0.0587(11) |
| F8_4 | 0.9879(3)   | 0.4311(4)   | 1.1315(3)   | 0.0490(13) |
| F9_4 | 1.0144(4)   | 0.3827(6)   | 1.0611(6)   | 0.0597(14) |
| O1_3 | 0.65471(19) | 0.22691(19) | 0.79899(18) | 0.0220(8)  |
| C1_3 | 0.65453(16) | 0.17539(17) | 0.75658(16) | 0.0233(6)  |
| C2_3 | 0.66954(14) | 0.10210(15) | 0.79178(15) | 0.0239(6)  |
| F1_3 | 0.61951(16) | 0.07441(19) | 0.7949(2)   | 0.0443(7)  |
| F2_3 | 0.6887(2)   | 0.05479(15) | 0.7613(2)   | 0.0342(8)  |
| F3_3 | 0.7161(2)   | 0.1076(2)   | 0.85502(15) | 0.0345(8)  |
| C3_3 | 0.7070(2)   | 0.19266(17) | 0.73459(18) | 0.0348(8)  |
| F4_3 | 0.70562(16) | 0.26038(11) | 0.72017(14) | 0.0484(7)  |
| F5_3 | 0.76582(12) | 0.17824(16) | 0.78452(15) | 0.0430(6)  |
| F6_3 | 0.69793(15) | 0.15553(12) | 0.68015(11) | 0.0476(6)  |
| C4_3 | 0.58640(17) | 0.17396(18) | 0.69448(18) | 0.0401(9)  |
| F7_3 | 0.57942(15) | 0.23006(14) | 0.65437(12) | 0.0541(7)  |
| F8_3 | 0.57659(14) | 0.11579(13) | 0.65740(13) | 0.0574(8)  |
| F9_3 | 0.54111(11) | 0.17713(14) | 0.71248(15) | 0.0526(7)  |
| O1_2 | 0.66683(9)  | 0.35527(10) | 0.86640(10) | 0.0293(4)  |
| C1_2 | 0.62531(12) | 0.40760(13) | 0.83305(14) | 0.0238(5)  |
| C2_2 | 0.55782(13) | 0.37811(14) | 0.78188(15) | 0.0303(6)  |
| F1_2 | 0.55766(9)  | 0.35494(10) | 0.72570(9)  | 0.0385(4)  |
| F2_2 | 0.51125(9)  | 0.42627(10) | 0.76415(12) | 0.0544(6)  |
| F3_2 | 0.54200(8)  | 0.32341(9)  | 0.80771(10) | 0.0360(4)  |
| C3_2 | 0.61831(15) | 0.45474(15) | 0.88603(17) | 0.0370(7)  |

|      |             |             |             |             |
|------|-------------|-------------|-------------|-------------|
| F4_2 | 0.67563(9)  | 0.46762(10) | 0.93803(10) | 0.0419(4)   |
| F5_2 | 0.58187(11) | 0.42217(11) | 0.90806(12) | 0.0540(6)   |
| F6_2 | 0.59075(11) | 0.51670(10) | 0.86053(14) | 0.0611(6)   |
| C4_2 | 0.65251(16) | 0.45214(18) | 0.79397(17) | 0.0420(7)   |
| F7_2 | 0.70148(10) | 0.49245(11) | 0.83566(11) | 0.0488(5)   |
| F8_2 | 0.60755(13) | 0.49460(13) | 0.74869(12) | 0.0721(8)   |
| F9_2 | 0.67407(12) | 0.40960(14) | 0.76199(12) | 0.0629(7)   |
| O1_1 | 0.70030(10) | 0.22895(11) | 0.94412(10) | 0.0323(4)   |
| C1_1 | 0.67284(14) | 0.20441(15) | 0.98133(14) | 0.0302(6)   |
| C2_1 | 0.68246(19) | 0.25833(19) | 1.03751(18) | 0.0467(8)   |
| F1_1 | 0.74317(12) | 0.25794(14) | 1.08673(11) | 0.0622(6)   |
| F2_1 | 0.64367(13) | 0.24306(14) | 1.06417(12) | 0.0640(7)   |
| F3_1 | 0.66950(13) | 0.32293(11) | 1.01271(13) | 0.0638(6)   |
| C3_1 | 0.59899(16) | 0.19075(17) | 0.93653(17) | 0.0399(7)   |
| F4_1 | 0.58756(11) | 0.16069(14) | 0.87907(11) | 0.0611(6)   |
| F5_1 | 0.56639(11) | 0.25099(12) | 0.92215(14) | 0.0625(6)   |
| F6_1 | 0.57404(10) | 0.14861(10) | 0.96592(11) | 0.0466(5)   |
| C4_1 | 0.70703(17) | 0.13411(17) | 1.01442(18) | 0.0418(7)   |
| F7_1 | 0.68810(12) | 0.08247(10) | 0.96838(13) | 0.0575(6)   |
| F8_1 | 0.69369(12) | 0.11264(13) | 1.06269(12) | 0.0620(6)   |
| F9_1 | 0.77062(11) | 0.14051(13) | 1.04089(12) | 0.0593(6)   |
| Ca01 | 0.73043(3)  | 0.68535(3)  | 0.51792(3)  | 0.02299(12) |
| Al2  | 0.85818(4)  | 0.28142(4)  | 0.91532(4)  | 0.02037(15) |
| Al3  | 0.72467(4)  | 0.79976(4)  | 0.63437(4)  | 0.01955(15) |
| Al1  | 0.69334(4)  | 0.27090(4)  | 0.87396(4)  | 0.01880(15) |
| F1   | 0.77484(7)  | 0.28078(8)  | 0.89225(8)  | 0.0251(3)   |
| F2   | 0.73541(8)  | 0.78830(8)  | 0.56476(8)  | 0.0265(3)   |

Table S 4 Fractional Atomic Coordinates ( $\times 10^4$ ) and Equivalent Isotropic Displacement Parameters ( $\text{\AA}^2 \times 10^3$ ) for [BaHMB(oDFB)<sub>3</sub>{f-al}][al-f-al] 4.  $U_{eq}$  is defined as 1/3 of the trace of the orthogonalised  $U_{ij}$  tensor.

| Atom  | x           | y         | z         | $U_{eq}$   |
|-------|-------------|-----------|-----------|------------|
| C1_25 | 0.2403(3)   | 0.3054(5) | 0.6089(4) | 0.0286(17) |
| C2_25 | 0.2334(3)   | 0.2426(5) | 0.5650(4) | 0.0270(16) |
| C3_25 | 0.1884(3)   | 0.2184(6) | 0.5459(4) | 0.038(2)   |
| H3_25 | 0.183707    | 0.174988  | 0.515913  | 0.045      |
| C4_25 | 0.1511(3)   | 0.2604(6) | 0.5724(5) | 0.041(2)   |
| H4_25 | 0.119621    | 0.246465  | 0.559737  | 0.050      |
| C5_25 | 0.1580(3)   | 0.3222(6) | 0.6168(5) | 0.039(2)   |
| H5_25 | 0.131310    | 0.349301  | 0.635049  | 0.046      |
| C6_25 | 0.2026(3)   | 0.3451(5) | 0.6349(4) | 0.0343(19) |
| H6_25 | 0.207303    | 0.388119  | 0.665259  | 0.041      |
| F1_25 | 0.28663(16) | 0.3233(3) | 0.6247(2) | 0.0341(11) |
| F2_25 | 0.27352(16) | 0.2046(3) | 0.5408(2) | 0.0383(12) |
| C1_24 | 0.4301(3)   | 0.4622(5) | 0.7037(4) | 0.0344(18) |
| C2_24 | 0.3877(3)   | 0.4467(5) | 0.6741(4) | 0.0322(17) |
| C3_24 | 0.3571(3)   | 0.5077(5) | 0.6545(4) | 0.037(2)   |
| H3_24 | 0.326864    | 0.495372  | 0.636241  | 0.045      |
| C4_24 | 0.3718(4)   | 0.5861(7) | 0.6622(5) | 0.052(3)   |
| H4_24 | 0.352447    | 0.629309  | 0.646492  | 0.063      |
| C5_24 | 0.4153(4)   | 0.6040(6) | 0.6931(4) | 0.052(3)   |
| H5_24 | 0.424390    | 0.659034  | 0.699962  | 0.063      |

|       |             |            |           |            |
|-------|-------------|------------|-----------|------------|
| C6_24 | 0.4450(3)   | 0.5415(6)  | 0.7137(5) | 0.043(2)   |
| H6_24 | 0.474608    | 0.552838   | 0.733988  | 0.052      |
| F1_24 | 0.4581(2)   | 0.4003(5)  | 0.7230(4) | 0.078(2)   |
| F2_24 | 0.37461(17) | 0.3662(3)  | 0.6644(2) | 0.0347(11) |
| C1_23 | 0.5010(3)   | 0.2384(5)  | 0.5306(4) | 0.0261(17) |
| C2_23 | 0.4980(2)   | 0.2993(4)  | 0.5745(4) | 0.0252(15) |
| C3_23 | 0.5381(3)   | 0.3356(5)  | 0.5996(4) | 0.0330(17) |
| H3_23 | 0.535888    | 0.379000   | 0.630143  | 0.040      |
| C4_23 | 0.5813(3)   | 0.3073(5)  | 0.5791(5) | 0.036(2)   |
| H4_23 | 0.609406    | 0.330320   | 0.596979  | 0.044      |
| C5_23 | 0.5850(3)   | 0.2460(5)  | 0.5331(5) | 0.0320(18) |
| H5_23 | 0.615504    | 0.228714   | 0.519038  | 0.038      |
| C6_23 | 0.5448(3)   | 0.2095(5)  | 0.5072(4) | 0.0332(18) |
| H6_23 | 0.546713    | 0.167297   | 0.475561  | 0.040      |
| F1_23 | 0.45907(15) | 0.2035(3)  | 0.5084(2) | 0.0305(10) |
| F2_23 | 0.45362(15) | 0.3224(3)  | 0.5946(2) | 0.0331(11) |
| C1_21 | 0.9991(3)   | 0.2646(4)  | 0.3744(4) | 0.0266(17) |
| C2_21 | 0.9953(3)   | 0.2046(5)  | 0.3291(4) | 0.0275(17) |
| C3_21 | 1.0345(3)   | 0.1657(5)  | 0.3032(4) | 0.0295(17) |
| H3_21 | 1.031148    | 0.123797   | 0.271527  | 0.035      |
| C4_21 | 1.0794(3)   | 0.1904(5)  | 0.3256(4) | 0.0309(18) |
| H4_21 | 1.107139    | 0.164001   | 0.309975  | 0.037      |
| C5_21 | 1.0833(3)   | 0.2531(5)  | 0.3702(5) | 0.037(2)   |
| H5_21 | 1.113965    | 0.270806   | 0.383269  | 0.044      |
| C6_21 | 1.0433(3)   | 0.2913(5)  | 0.3967(4) | 0.0305(17) |
| H6_21 | 1.046085    | 0.333338   | 0.428348  | 0.037      |
| F1_21 | 0.95829(15) | 0.2986(3)  | 0.3976(2) | 0.0279(10) |
| F2_21 | 0.95030(15) | 0.1825(3)  | 0.3102(2) | 0.0311(10) |
| C1_20 | 0.9281(3)   | 0.0505(5)  | 0.2044(4) | 0.0312(17) |
| C2_20 | 0.8843(3)   | 0.0614(5)  | 0.2321(4) | 0.0285(16) |
| C3_20 | 0.8575(3)   | -0.0020(6) | 0.2539(4) | 0.039(2)   |
| H3_20 | 0.827461    | 0.007583   | 0.273513  | 0.047      |
| C4_20 | 0.8748(4)   | -0.0825(6) | 0.2469(4) | 0.040(2)   |
| H4_20 | 0.856588    | -0.128014  | 0.260589  | 0.048      |
| C5_20 | 0.9196(4)   | -0.0925(5) | 0.2193(4) | 0.041(2)   |
| H5_20 | 0.932223    | -0.145836  | 0.215561  | 0.050      |
| C6_20 | 0.9465(3)   | -0.0270(6) | 0.1969(4) | 0.0377(19) |
| H6_20 | 0.976583    | -0.035300  | 0.177007  | 0.045      |
| F1_20 | 0.9524(2)   | 0.1156(4)  | 0.1828(3) | 0.0524(14) |
| F2_20 | 0.86869(18) | 0.1400(3)  | 0.2399(2) | 0.0355(11) |
| C1_19 | 0.7368(3)   | 0.1958(5)  | 0.3074(4) | 0.0275(16) |
| C2_19 | 0.7308(3)   | 0.2517(5)  | 0.3558(4) | 0.0281(18) |
| C3_19 | 0.6870(3)   | 0.2739(5)  | 0.3777(4) | 0.0295(17) |
| H3_19 | 0.683389    | 0.313249   | 0.411284  | 0.035      |
| C4_19 | 0.6481(3)   | 0.2367(5)  | 0.3489(5) | 0.036(2)   |
| H4_19 | 0.617014    | 0.250196   | 0.363340  | 0.043      |
| C5_19 | 0.6541(3)   | 0.1795(5)  | 0.2989(5) | 0.038(2)   |
| H5_19 | 0.627092    | 0.154999   | 0.279138  | 0.046      |
| C6_19 | 0.6986(3)   | 0.1589(5)  | 0.2784(5) | 0.038(2)   |
| H6_19 | 0.703007    | 0.119805   | 0.244771  | 0.046      |
| F1_19 | 0.78288(16) | 0.1793(3)  | 0.2886(2) | 0.0366(11) |
| F2_19 | 0.77116(16) | 0.2863(3)  | 0.3823(2) | 0.0330(10) |
| O1_18 | 0.82027(18) | 0.3207(3)  | 0.5721(3) | 0.0252(11) |
| C1_18 | 0.7765(2)   | 0.3485(4)  | 0.5855(3) | 0.0269(15) |
| C2_18 | 0.7655(3)   | 0.4265(5)  | 0.5446(4) | 0.0380(18) |

|       |             |            |           |            |
|-------|-------------|------------|-----------|------------|
| F1_18 | 0.75572(18) | 0.4061(3)  | 0.4819(2) | 0.0426(12) |
| F2_18 | 0.72818(19) | 0.4669(3)  | 0.5679(3) | 0.0597(15) |
| F3_18 | 0.80283(19) | 0.4751(3)  | 0.5434(3) | 0.0461(13) |
| C3_18 | 0.7732(3)   | 0.3695(5)  | 0.6596(4) | 0.0444(19) |
| F4_18 | 0.7948(2)   | 0.3126(4)  | 0.6958(2) | 0.0551(14) |
| F5_18 | 0.7945(2)   | 0.4399(4)  | 0.6723(3) | 0.0578(15) |
| F6_18 | 0.7282(2)   | 0.3754(4)  | 0.6801(3) | 0.0634(16) |
| C4_18 | 0.7394(3)   | 0.2813(5)  | 0.5695(4) | 0.0352(17) |
| F7_18 | 0.73964(19) | 0.2231(3)  | 0.6156(3) | 0.0491(13) |
| F8_18 | 0.69550(16) | 0.3102(4)  | 0.5639(3) | 0.0572(14) |
| F9_18 | 0.75039(17) | 0.2455(3)  | 0.5127(2) | 0.0378(11) |
| O1_17 | 0.91911(17) | 0.3073(3)  | 0.5535(2) | 0.0236(11) |
| C1_17 | 0.9488(2)   | 0.3547(4)  | 0.5889(3) | 0.0266(15) |
| C2_17 | 0.9572(3)   | 0.4366(4)  | 0.5533(4) | 0.0337(17) |
| F1_17 | 0.91619(18) | 0.4665(3)  | 0.5314(3) | 0.0415(12) |
| F2_17 | 0.97621(18) | 0.4943(3)  | 0.5911(3) | 0.0472(12) |
| F3_17 | 0.98585(19) | 0.4268(3)  | 0.5015(2) | 0.0422(12) |
| C3_17 | 0.9966(3)   | 0.3091(5)  | 0.5971(4) | 0.0403(19) |
| F4_17 | 0.99268(19) | 0.2490(3)  | 0.6410(3) | 0.0463(13) |
| F5_17 | 1.00978(17) | 0.2749(3)  | 0.5407(3) | 0.0444(13) |
| F6_17 | 1.03169(17) | 0.3581(3)  | 0.6163(3) | 0.0538(14) |
| C4_17 | 0.9276(3)   | 0.3722(5)  | 0.6576(4) | 0.0441(19) |
| F7_17 | 0.9074(2)   | 0.3041(3)  | 0.6822(2) | 0.0509(14) |
| F8_17 | 0.9608(2)   | 0.3959(4)  | 0.7008(2) | 0.0634(17) |
| F9_17 | 0.89439(19) | 0.4292(3)  | 0.6551(3) | 0.0504(13) |
| O1_16 | 0.86139(18) | 0.2030(3)  | 0.4786(2) | 0.0199(10) |
| C1_16 | 0.8673(2)   | 0.1220(4)  | 0.4924(3) | 0.0208(13) |
| C2_16 | 0.8430(2)   | 0.0977(4)  | 0.5570(3) | 0.0279(15) |
| F1_16 | 0.79534(16) | 0.0923(3)  | 0.5498(3) | 0.0476(14) |
| F2_16 | 0.85788(17) | 0.0252(2)  | 0.5795(2) | 0.0373(11) |
| F3_16 | 0.85151(18) | 0.1538(3)  | 0.6029(2) | 0.0381(11) |
| C3_16 | 0.9210(2)   | 0.1005(4)  | 0.4975(4) | 0.0310(15) |
| F4_16 | 0.94502(17) | 0.1399(3)  | 0.4509(3) | 0.0438(12) |
| F5_16 | 0.93897(17) | 0.1228(3)  | 0.5551(3) | 0.0408(12) |
| F6_16 | 0.92850(18) | 0.0209(3)  | 0.4881(3) | 0.0446(12) |
| C4_16 | 0.8447(3)   | 0.0747(4)  | 0.4349(4) | 0.0356(17) |
| F7_16 | 0.8714(2)   | 0.0892(3)  | 0.3803(2) | 0.0460(14) |
| F8_16 | 0.8424(2)   | -0.0047(3) | 0.4431(3) | 0.0467(12) |
| F9_16 | 0.80101(18) | 0.1028(3)  | 0.4217(2) | 0.0454(12) |
| O1_15 | 0.41419(18) | 0.1808(3)  | 0.3570(3) | 0.0261(11) |
| C1_15 | 0.4420(3)   | 0.1320(4)  | 0.3184(3) | 0.0311(16) |
| C2_15 | 0.4169(3)   | 0.1161(5)  | 0.2530(4) | 0.0414(18) |
| F1_15 | 0.39498(19) | 0.1822(3)  | 0.2309(2) | 0.0470(12) |
| F2_15 | 0.4472(2)   | 0.0907(4)  | 0.2064(3) | 0.0565(15) |
| F3_15 | 0.38374(19) | 0.0575(3)  | 0.2593(3) | 0.0571(15) |
| C3_15 | 0.4520(3)   | 0.0500(5)  | 0.3545(4) | 0.043(2)   |
| F4_15 | 0.4832(2)   | 0.0619(4)  | 0.4033(3) | 0.0596(16) |
| F5_15 | 0.4124(2)   | 0.0204(3)  | 0.3812(3) | 0.0492(13) |
| F6_15 | 0.4692(2)   | -0.0062(3) | 0.3142(3) | 0.0592(15) |
| C4_15 | 0.4891(3)   | 0.1776(5)  | 0.3068(4) | 0.0388(18) |
| F7_15 | 0.50563(18) | 0.2115(4)  | 0.3611(3) | 0.0444(13) |
| F8_15 | 0.52296(18) | 0.1292(4)  | 0.2823(3) | 0.0561(15) |
| F9_15 | 0.48213(18) | 0.2375(3)  | 0.2632(3) | 0.0460(13) |
| O1_14 | 0.31347(18) | 0.1678(3)  | 0.3473(3) | 0.0268(11) |
| C1_14 | 0.2697(2)   | 0.1359(4)  | 0.3408(3) | 0.0256(14) |

|       |             |           |           |            |
|-------|-------------|-----------|-----------|------------|
| C2_14 | 0.2645(3)   | 0.0597(4) | 0.3850(4) | 0.0298(15) |
| F1_14 | 0.25894(16) | 0.0812(3) | 0.4469(2) | 0.0344(10) |
| F2_14 | 0.22717(17) | 0.0126(3) | 0.3684(2) | 0.0440(12) |
| F3_14 | 0.30334(17) | 0.0139(3) | 0.3824(3) | 0.0399(12) |
| C3_14 | 0.2614(3)   | 0.1118(5) | 0.2679(4) | 0.0425(19) |
| F4_14 | 0.2784(2)   | 0.1676(4) | 0.2286(2) | 0.0546(14) |
| F5_14 | 0.2839(2)   | 0.0410(3) | 0.2548(2) | 0.0550(14) |
| F6_14 | 0.21585(19) | 0.1001(4) | 0.2536(3) | 0.0572(15) |
| C4_14 | 0.2317(3)   | 0.2009(5) | 0.3606(4) | 0.0404(19) |
| F7_14 | 0.2259(2)   | 0.2556(3) | 0.3124(3) | 0.0518(14) |
| F8_14 | 0.18959(16) | 0.1670(3) | 0.3731(3) | 0.0538(14) |
| F9_14 | 0.24572(19) | 0.2417(3) | 0.4123(3) | 0.0406(12) |
| O1_13 | 0.35990(18) | 0.2896(3) | 0.4330(3) | 0.0229(10) |
| C1_13 | 0.3636(2)   | 0.3702(4) | 0.4137(3) | 0.0228(14) |
| C2_13 | 0.3366(2)   | 0.3864(4) | 0.3480(3) | 0.0273(14) |
| F1_13 | 0.29016(17) | 0.3844(3) | 0.3557(3) | 0.0441(13) |
| F2_13 | 0.34851(17) | 0.4571(2) | 0.3221(2) | 0.0346(10) |
| F3_13 | 0.34829(17) | 0.3272(3) | 0.3057(2) | 0.0339(10) |
| C3_13 | 0.4169(3)   | 0.3938(4) | 0.4062(4) | 0.0313(15) |
| F4_13 | 0.44144(17) | 0.3638(3) | 0.4565(3) | 0.0449(13) |
| F5_13 | 0.43473(17) | 0.3636(3) | 0.3515(3) | 0.0412(11) |
| F6_13 | 0.42284(18) | 0.4738(3) | 0.4046(3) | 0.0441(12) |
| C4_13 | 0.3398(3)   | 0.4207(4) | 0.4688(4) | 0.0358(17) |
| F7_13 | 0.3675(2)   | 0.4136(3) | 0.5238(2) | 0.0511(15) |
| F8_13 | 0.3358(2)   | 0.4990(3) | 0.4546(3) | 0.0473(13) |
| F9_13 | 0.2980(2)   | 0.3917(3) | 0.4848(3) | 0.0534(15) |
| O1_12 | 0.57736(19) | 0.5953(3) | 0.4410(3) | 0.0273(12) |
| C1_12 | 0.5984(2)   | 0.5445(4) | 0.3983(3) | 0.0248(14) |
| C2_12 | 0.5628(3)   | 0.4773(5) | 0.3778(4) | 0.0401(18) |
| F1_12 | 0.53152(17) | 0.5074(3) | 0.3332(3) | 0.0592(15) |
| F2_12 | 0.5837(2)   | 0.4134(3) | 0.3499(3) | 0.0547(15) |
| F3_12 | 0.53863(19) | 0.4506(3) | 0.4289(3) | 0.0525(15) |
| C3_12 | 0.6422(3)   | 0.5045(4) | 0.4311(4) | 0.0358(16) |
| F4_12 | 0.66533(16) | 0.5577(3) | 0.4676(2) | 0.0397(11) |
| F5_12 | 0.62890(18) | 0.4419(3) | 0.4701(3) | 0.0482(12) |
| F6_12 | 0.67346(17) | 0.4732(3) | 0.3884(3) | 0.0461(12) |
| C4_12 | 0.6161(3)   | 0.5929(4) | 0.3367(3) | 0.0361(16) |
| F7_12 | 0.65489(18) | 0.6346(3) | 0.3507(2) | 0.0420(12) |
| F8_12 | 0.6258(2)   | 0.5434(3) | 0.2863(2) | 0.0541(14) |
| F9_12 | 0.5821(2)   | 0.6446(3) | 0.3174(3) | 0.0514(13) |
| O1_11 | 0.60875(17) | 0.6666(3) | 0.5641(2) | 0.0230(9)  |
| C1_11 | 0.6028(2)   | 0.6386(4) | 0.6261(3) | 0.0207(13) |
| C2_11 | 0.5709(2)   | 0.6970(4) | 0.6659(3) | 0.0300(15) |
| F1_11 | 0.52451(14) | 0.6839(3) | 0.6492(2) | 0.0395(11) |
| F2_11 | 0.57454(16) | 0.6863(3) | 0.7300(2) | 0.0403(11) |
| F3_11 | 0.58013(17) | 0.7747(3) | 0.6523(2) | 0.0382(11) |
| C3_11 | 0.6532(2)   | 0.6356(4) | 0.6590(3) | 0.0272(14) |
| F4_11 | 0.68402(14) | 0.5992(3) | 0.6203(2) | 0.0354(10) |
| F5_11 | 0.66835(16) | 0.7110(3) | 0.6710(2) | 0.0330(10) |
| F6_11 | 0.65304(16) | 0.5947(3) | 0.7154(2) | 0.0388(10) |
| C4_11 | 0.5808(3)   | 0.5516(4) | 0.6248(4) | 0.0346(16) |
| F7_11 | 0.61366(18) | 0.4969(3) | 0.6079(3) | 0.0468(13) |
| F8_11 | 0.56398(18) | 0.5300(3) | 0.6840(2) | 0.0444(12) |
| F9_11 | 0.54521(17) | 0.5480(3) | 0.5833(2) | 0.0417(12) |
| O1_10 | 0.52717(16) | 0.7261(3) | 0.4996(3) | 0.0270(11) |

|       |             |           |           |            |
|-------|-------------|-----------|-----------|------------|
| C1_10 | 0.4823(3)   | 0.7396(4) | 0.4780(4) | 0.0286(16) |
| C2_10 | 0.4595(3)   | 0.6617(5) | 0.4502(5) | 0.044(2)   |
| F1_10 | 0.46937(19) | 0.5985(3) | 0.4894(3) | 0.0568(15) |
| F2_10 | 0.41241(16) | 0.6662(3) | 0.4422(3) | 0.0505(14) |
| F3_10 | 0.47728(19) | 0.6437(4) | 0.3912(3) | 0.0692(19) |
| C3_10 | 0.4837(3)   | 0.8058(6) | 0.4228(4) | 0.054(2)   |
| F4_10 | 0.4904(2)   | 0.8788(3) | 0.4509(4) | 0.083(2)   |
| F5_10 | 0.5192(2)   | 0.7884(5) | 0.3824(3) | 0.089(2)   |
| F6_10 | 0.4440(2)   | 0.8091(4) | 0.3902(3) | 0.0707(19) |
| C4_10 | 0.4524(3)   | 0.7694(5) | 0.5365(4) | 0.0346(17) |
| F7_10 | 0.47703(17) | 0.8229(3) | 0.5721(3) | 0.0490(13) |
| F8_10 | 0.41262(17) | 0.8070(3) | 0.5155(3) | 0.0554(15) |
| F9_10 | 0.43983(18) | 0.7082(4) | 0.5754(3) | 0.0555(14) |
| O1_9  | 0.65666(19) | 0.9084(3) | 0.4580(2) | 0.0244(11) |
| C1_9  | 0.6474(2)   | 0.9556(4) | 0.5111(3) | 0.0238(14) |
| C2_9  | 0.6694(3)   | 1.0408(4) | 0.5004(4) | 0.0313(16) |
| F1_9  | 0.64380(18) | 1.0841(3) | 0.4591(3) | 0.0436(12) |
| F2_9  | 0.6727(2)   | 1.0828(3) | 0.5562(3) | 0.0463(13) |
| F3_9  | 0.71272(16) | 1.0350(3) | 0.4759(3) | 0.0439(12) |
| C3_9  | 0.6687(3)   | 0.9149(4) | 0.5740(3) | 0.0337(15) |
| F4_9  | 0.66609(18) | 0.8350(3) | 0.5700(2) | 0.0396(10) |
| F5_9  | 0.71405(16) | 0.9335(3) | 0.5820(3) | 0.0462(12) |
| F6_9  | 0.64629(19) | 0.9378(3) | 0.6286(2) | 0.0439(11) |
| C4_9  | 0.5925(2)   | 0.9634(4) | 0.5198(4) | 0.0330(15) |
| F7_9  | 0.57439(16) | 0.8939(3) | 0.5419(2) | 0.0425(11) |
| F8_9  | 0.58131(17) | 1.0224(3) | 0.5632(3) | 0.0460(12) |
| F9_9  | 0.57129(16) | 0.9814(3) | 0.4627(3) | 0.0450(12) |
| O1_8  | 0.6506(2)   | 0.8218(3) | 0.3399(3) | 0.0318(12) |
| C1_8  | 0.6456(3)   | 0.8680(4) | 0.2857(3) | 0.0298(16) |
| C2_8  | 0.6940(3)   | 0.9067(4) | 0.2673(3) | 0.0355(16) |
| F1_8  | 0.72401(19) | 0.8509(3) | 0.2417(2) | 0.0473(12) |
| F2_8  | 0.68964(19) | 0.9671(3) | 0.2234(2) | 0.0482(13) |
| F3_8  | 0.71486(18) | 0.9386(3) | 0.3201(2) | 0.0440(12) |
| C3_8  | 0.6091(3)   | 0.9368(5) | 0.2954(4) | 0.0438(18) |
| F4_8  | 0.57118(18) | 0.9079(3) | 0.3270(3) | 0.0512(13) |
| F5_8  | 0.62692(19) | 0.9978(3) | 0.3312(3) | 0.0447(12) |
| F6_8  | 0.5930(2)   | 0.9680(3) | 0.2389(3) | 0.0579(14) |
| C4_8  | 0.6292(3)   | 0.8112(5) | 0.2286(3) | 0.0361(17) |
| F7_8  | 0.58281(19) | 0.7918(4) | 0.2359(3) | 0.0498(13) |
| F8_8  | 0.6346(2)   | 0.8467(3) | 0.1705(2) | 0.0510(14) |
| F9_8  | 0.6535(2)   | 0.7419(3) | 0.2283(2) | 0.0430(12) |
| O1_7  | 0.71285(18) | 0.7605(3) | 0.4393(3) | 0.0279(12) |
| C1_7  | 0.7604(2)   | 0.7471(4) | 0.4411(4) | 0.0275(15) |
| C2_7  | 0.7688(2)   | 0.6614(4) | 0.4711(3) | 0.0286(15) |
| F1_7  | 0.75848(16) | 0.6028(3) | 0.4293(2) | 0.0354(11) |
| F2_7  | 0.81376(15) | 0.6509(3) | 0.4908(2) | 0.0407(11) |
| F3_7  | 0.74123(16) | 0.6505(3) | 0.5236(2) | 0.0372(10) |
| C3_7  | 0.7845(2)   | 0.8119(4) | 0.4860(4) | 0.0334(16) |
| F4_7  | 0.76895(16) | 0.8853(3) | 0.4712(3) | 0.0446(12) |
| F5_7  | 0.77584(17) | 0.7970(3) | 0.5494(2) | 0.0439(11) |
| F6_7  | 0.83180(16) | 0.8129(3) | 0.4786(3) | 0.0507(14) |
| C4_7  | 0.7825(3)   | 0.7488(5) | 0.3725(4) | 0.0370(18) |
| F7_7  | 0.7882(2)   | 0.8262(3) | 0.3527(3) | 0.0539(14) |
| F8_7  | 0.82484(16) | 0.7129(3) | 0.3706(3) | 0.0447(12) |
| F9_7  | 0.75328(19) | 0.7117(4) | 0.3302(2) | 0.0477(13) |



|      |             |           |           |            |
|------|-------------|-----------|-----------|------------|
| O1_6 | 0.16005(19) | 0.5956(3) | 0.4597(2) | 0.0259(11) |
| C1_6 | 0.1586(2)   | 0.5473(4) | 0.4061(3) | 0.0243(14) |
| C2_6 | 0.1648(3)   | 0.4568(5) | 0.4274(4) | 0.0375(18) |
| F1_6 | 0.12485(19) | 0.4280(3) | 0.4538(3) | 0.0456(13) |
| F2_6 | 0.1763(2)   | 0.4085(3) | 0.3776(3) | 0.0498(14) |
| F3_6 | 0.19847(18) | 0.4502(3) | 0.4727(3) | 0.0438(12) |
| C3_6 | 0.1995(3)   | 0.5698(5) | 0.3578(3) | 0.0334(16) |
| F4_6 | 0.20453(18) | 0.6507(3) | 0.3545(2) | 0.0395(11) |
| F5_6 | 0.24111(15) | 0.5388(3) | 0.3792(2) | 0.0399(11) |
| F6_6 | 0.19176(19) | 0.5423(4) | 0.2974(2) | 0.0518(14) |
| C4_6 | 0.1110(3)   | 0.5574(5) | 0.3708(4) | 0.0354(17) |
| F7_6 | 0.10932(19) | 0.6302(3) | 0.3391(2) | 0.0467(12) |
| F8_6 | 0.10130(18) | 0.4988(4) | 0.3274(3) | 0.0523(15) |
| F9_6 | 0.07497(16) | 0.5581(3) | 0.4148(2) | 0.0419(12) |
| O1_5 | 0.21513(17) | 0.7442(3) | 0.4850(3) | 0.0205(11) |
| C1_5 | 0.2619(2)   | 0.7545(4) | 0.5018(3) | 0.0213(14) |
| C2_5 | 0.2669(3)   | 0.7794(4) | 0.5739(3) | 0.0258(15) |
| F1_5 | 0.26093(16) | 0.7151(3) | 0.6133(2) | 0.0316(10) |
| F2_5 | 0.30966(15) | 0.8116(3) | 0.5885(2) | 0.0339(10) |
| F3_5 | 0.23404(15) | 0.8350(3) | 0.5911(2) | 0.0323(10) |
| C3_5 | 0.2812(2)   | 0.8240(5) | 0.4575(4) | 0.0285(16) |
| F4_5 | 0.26882(15) | 0.8135(3) | 0.3949(2) | 0.0333(10) |
| F5_5 | 0.26488(17) | 0.8963(3) | 0.4777(3) | 0.0366(11) |
| F6_5 | 0.32904(14) | 0.8278(3) | 0.4590(2) | 0.0363(11) |
| C4_5 | 0.2904(2)   | 0.6753(4) | 0.4902(3) | 0.0291(15) |
| F7_5 | 0.30043(16) | 0.6657(3) | 0.4267(2) | 0.0326(10) |
| F8_5 | 0.33163(15) | 0.6747(3) | 0.5232(2) | 0.0313(10) |
| F9_5 | 0.26518(16) | 0.6109(3) | 0.5099(2) | 0.0321(10) |
| O1_4 | 0.15038(19) | 0.6818(3) | 0.5778(2) | 0.0250(11) |
| C1_4 | 0.1335(2)   | 0.6343(4) | 0.6278(3) | 0.0251(15) |
| C2_4 | 0.1711(3)   | 0.5761(5) | 0.6536(4) | 0.0410(18) |
| F1_4 | 0.20163(19) | 0.6184(4) | 0.6939(3) | 0.0557(15) |
| F2_4 | 0.15238(17) | 0.5130(3) | 0.6860(2) | 0.0396(11) |
| F3_4 | 0.19648(18) | 0.5441(3) | 0.6040(2) | 0.0456(13) |
| C3_4 | 0.0899(3)   | 0.5838(5) | 0.6029(4) | 0.0434(19) |
| F4_4 | 0.06280(19) | 0.6282(4) | 0.5634(3) | 0.0521(14) |
| F5_4 | 0.1060(2)   | 0.5161(3) | 0.5712(2) | 0.0509(14) |
| F6_4 | 0.06193(18) | 0.5600(4) | 0.6532(3) | 0.0533(15) |
| C4_4 | 0.1161(3)   | 0.6925(5) | 0.6831(4) | 0.0446(19) |
| F7_4 | 0.0745(2)   | 0.7265(4) | 0.6667(3) | 0.0628(18) |
| F8_4 | 0.1117(3)   | 0.6501(3) | 0.7400(2) | 0.0607(17) |
| F9_4 | 0.1496(3)   | 0.7500(3) | 0.6936(3) | 0.0530(16) |
| O1_3 | 0.08591(17) | 0.8241(3) | 0.3462(2) | 0.0194(10) |
| C1_3 | 0.1068(2)   | 0.8682(4) | 0.2976(3) | 0.0206(13) |
| C2_3 | 0.1611(2)   | 0.8561(4) | 0.2994(4) | 0.0308(15) |
| F1_3 | 0.17684(16) | 0.8596(3) | 0.3615(2) | 0.0398(11) |
| F2_3 | 0.18373(17) | 0.9147(3) | 0.2654(3) | 0.0435(12) |
| F3_3 | 0.17258(17) | 0.7835(3) | 0.2746(3) | 0.0453(12) |
| C3_3 | 0.0858(3)   | 0.8391(4) | 0.2308(3) | 0.0280(14) |
| F4_3 | 0.04281(16) | 0.8686(3) | 0.2214(2) | 0.0355(10) |
| F5_3 | 0.0839(2)   | 0.7580(3) | 0.2294(2) | 0.0359(11) |
| F6_3 | 0.1135(2)   | 0.8622(3) | 0.1815(2) | 0.0448(13) |
| C4_3 | 0.0951(2)   | 0.9605(4) | 0.3055(3) | 0.0266(14) |
| F7_3 | 0.05007(15) | 0.9708(3) | 0.3240(2) | 0.0332(10) |
| F8_3 | 0.10176(16) | 1.0025(3) | 0.2501(2) | 0.0333(9)  |

|      |              |             |             |            |
|------|--------------|-------------|-------------|------------|
| F9_3 | 0.12289(18)  | 0.9939(3)   | 0.3523(2)   | 0.0353(11) |
| O1_2 | 0.08048(17)  | 0.9065(3)   | 0.4671(2)   | 0.0210(10) |
| C1_2 | 0.0845(2)    | 0.9519(4)   | 0.5224(3)   | 0.0206(13) |
| C2_2 | 0.1353(2)    | 0.9437(5)   | 0.5515(4)   | 0.0318(16) |
| F1_2 | 0.13899(18)  | 0.8703(3)   | 0.5814(2)   | 0.0424(12) |
| F2_2 | 0.14573(18)  | 1.0010(3)   | 0.5954(2)   | 0.0441(12) |
| F3_2 | 0.16801(16)  | 0.9469(3)   | 0.5055(2)   | 0.0392(11) |
| C3_2 | 0.0756(3)    | 1.0428(4)   | 0.5034(4)   | 0.0297(16) |
| F4_2 | 0.03895(17)  | 1.0490(3)   | 0.4619(2)   | 0.0357(11) |
| F5_2 | 0.11284(19)  | 1.0761(3)   | 0.4761(2)   | 0.0418(12) |
| F6_2 | 0.06495(19)  | 1.0879(3)   | 0.5568(2)   | 0.0406(12) |
| C4_2 | 0.0475(3)    | 0.9233(5)   | 0.5736(3)   | 0.0308(15) |
| F7_2 | 0.00434(15)  | 0.9526(3)   | 0.5579(2)   | 0.0356(10) |
| F8_2 | 0.05789(18)  | 0.9492(3)   | 0.6343(2)   | 0.0413(12) |
| F9_2 | 0.04437(18)  | 0.8432(3)   | 0.5742(2)   | 0.0366(10) |
| O1_1 | 0.02676(17)  | 0.7569(3)   | 0.4421(2)   | 0.0197(10) |
| C1_1 | -0.0192(2)   | 0.7471(4)   | 0.4231(3)   | 0.0203(14) |
| C2_1 | -0.0414(3)   | 0.6805(4)   | 0.4688(4)   | 0.0293(16) |
| F1_1 | -0.02533(17) | 0.6064(3)   | 0.4519(2)   | 0.0341(10) |
| F2_1 | -0.08865(14) | 0.6793(3)   | 0.4635(2)   | 0.0322(10) |
| F3_1 | -0.02907(16) | 0.6935(3)   | 0.5302(2)   | 0.0342(10) |
| C3_1 | -0.0476(2)   | 0.8273(4)   | 0.4298(4)   | 0.0272(15) |
| F4_1 | -0.02054(16) | 0.8905(3)   | 0.4102(2)   | 0.0333(10) |
| F5_1 | -0.05785(17) | 0.8425(3)   | 0.4932(2)   | 0.0367(11) |
| F6_1 | -0.08792(15) | 0.8296(3)   | 0.3968(2)   | 0.0336(10) |
| C4_1 | -0.0232(2)   | 0.7184(4)   | 0.3510(3)   | 0.0249(14) |
| F7_1 | -0.01577(17) | 0.7816(3)   | 0.3099(2)   | 0.0347(10) |
| F8_1 | -0.06579(15) | 0.6870(3)   | 0.3361(2)   | 0.0326(10) |
| F9_1 | 0.00987(15)  | 0.6632(3)   | 0.3377(2)   | 0.0317(9)  |
| Ba1  | 0.86630(2)   | 0.26333(2)  | 0.34260(2)  | 0.01811(8) |
| F4   | 0.12132(16)  | 0.7516(3)   | 0.4616(2)   | 0.0179(7)  |
| Ba2  | 0.36912(2)   | 0.23927(2)  | 0.56958(2)  | 0.01915(8) |
| F3   | 0.61844(18)  | 0.7504(3)   | 0.4527(2)   | 0.0202(7)  |
| Al3  | 0.66323(8)   | 0.81584(13) | 0.42124(10) | 0.0183(4)  |
| Al5  | 0.16487(7)   | 0.68755(13) | 0.49722(10) | 0.0169(4)  |
| Al2  | 0.36136(8)   | 0.19219(13) | 0.39619(10) | 0.0184(4)  |
| Al1  | 0.86449(8)   | 0.29846(13) | 0.51832(10) | 0.0187(4)  |
| F1   | 0.85998(15)  | 0.3514(2)   | 0.44720(19) | 0.0232(9)  |
| Al4  | 0.58058(7)   | 0.67916(13) | 0.49018(10) | 0.0175(4)  |
| Al6  | 0.07631(7)   | 0.81518(13) | 0.42830(10) | 0.0159(4)  |
| F2   | 0.36066(15)  | 0.1431(2)   | 0.46989(18) | 0.0224(8)  |
| C1   | 0.8278(3)    | 0.4275(5)   | 0.2810(4)   | 0.0272(16) |
| C2   | 0.8286(3)    | 0.3737(5)   | 0.2274(3)   | 0.0224(15) |
| C3   | 0.8724(3)    | 0.3462(5)   | 0.2018(4)   | 0.0275(17) |
| C4   | 0.9153(3)    | 0.3710(5)   | 0.2328(4)   | 0.0280(17) |
| C5   | 0.9145(3)    | 0.4255(5)   | 0.2851(4)   | 0.0250(15) |
| C6   | 0.8709(3)    | 0.4519(4)   | 0.3106(4)   | 0.0302(17) |
| C7   | 0.7814(3)    | 0.4621(6)   | 0.3080(5)   | 0.042(2)   |
| H7A  | 0.780121     | 0.520746    | 0.299582    | 0.063      |
| H7B  | 0.779918     | 0.452252    | 0.355207    | 0.063      |
| H7C  | 0.754497     | 0.435346    | 0.286499    | 0.063      |
| C8   | 0.7826(3)    | 0.3481(6)   | 0.1935(4)   | 0.039(2)   |
| H8A  | 0.772750     | 0.390651    | 0.162684    | 0.058      |
| H8B  | 0.757675     | 0.340268    | 0.226307    | 0.058      |
| H8C  | 0.787720     | 0.297107    | 0.169752    | 0.058      |

|         |           |            |           |            |
|---------|-----------|------------|-----------|------------|
| C9      | 0.8735(3) | 0.2944(5)  | 0.1410(4) | 0.039(2)   |
| H9A     | 0.851784  | 0.317187   | 0.108296  | 0.058      |
| H9B     | 0.863667  | 0.238834   | 0.151825  | 0.058      |
| H9C     | 0.905820  | 0.293548   | 0.123320  | 0.058      |
| C10     | 0.9620(3) | 0.3420(7)  | 0.2039(4) | 0.043(2)   |
| H10A    | 0.961098  | 0.282829   | 0.198150  | 0.065      |
| H10B    | 0.988117  | 0.356417   | 0.233463  | 0.065      |
| H10C    | 0.967021  | 0.368187   | 0.161377  | 0.065      |
| C11     | 0.9594(3) | 0.4594(6)  | 0.3143(5) | 0.045(2)   |
| H11A    | 0.985965  | 0.449775   | 0.284379  | 0.067      |
| H11B    | 0.965867  | 0.432525   | 0.356187  | 0.067      |
| H11C    | 0.955754  | 0.518072   | 0.321449  | 0.067      |
| C12     | 0.8701(4) | 0.5127(5)  | 0.3666(4) | 0.043(2)   |
| H12A    | 0.858658  | 0.565380   | 0.350469  | 0.064      |
| H12B    | 0.902159  | 0.519007   | 0.384404  | 0.064      |
| H12C    | 0.848782  | 0.492935   | 0.400940  | 0.064      |
| C1_26   | 0.3385(3) | 0.0767(5)  | 0.6377(4) | 0.0306(17) |
| C2_26   | 0.3338(3) | 0.1336(5)  | 0.6901(4) | 0.0261(16) |
| C3_26   | 0.3741(3) | 0.1706(5)  | 0.7154(4) | 0.0287(17) |
| C4_26   | 0.4195(3) | 0.1505(5)  | 0.6908(4) | 0.0352(19) |
| C5_26   | 0.4247(3) | 0.0938(5)  | 0.6410(5) | 0.041(2)   |
| C6_26   | 0.3831(4) | 0.0557(5)  | 0.6147(4) | 0.040(2)   |
| C7_26   | 0.2950(4) | 0.0342(6)  | 0.6102(5) | 0.058(3)   |
| H7A_26  | 0.295776  | 0.036425   | 0.562293  | 0.087      |
| H7B_26  | 0.266297  | 0.061558   | 0.625981  | 0.087      |
| H7C_26  | 0.294778  | -0.022687  | 0.624462  | 0.087      |
| C8_26   | 0.2859(3) | 0.1529(6)  | 0.7194(4) | 0.041(2)   |
| H8A_26  | 0.282599  | 0.212001   | 0.724200  | 0.062      |
| H8B_26  | 0.283325  | 0.127014   | 0.762407  | 0.062      |
| H8C_26  | 0.260821  | 0.132305   | 0.690631  | 0.062      |
| C9_26   | 0.3678(5) | 0.2305(6)  | 0.7726(4) | 0.053(3)   |
| H9A_26  | 0.393064  | 0.271519   | 0.771172  | 0.079      |
| H9B_26  | 0.369555  | 0.200778   | 0.814053  | 0.079      |
| H9C_26  | 0.336888  | 0.257324   | 0.768870  | 0.079      |
| C10_26  | 0.4644(3) | 0.1876(8)  | 0.7225(5) | 0.061(3)   |
| H10A_26 | 0.490691  | 0.185806   | 0.691297  | 0.092      |
| H10B_26 | 0.472831  | 0.156179   | 0.761612  | 0.092      |
| H10C_26 | 0.458066  | 0.244155   | 0.734865  | 0.092      |
| C11_26  | 0.4728(4) | 0.0656(9)  | 0.6182(7) | 0.093(5)   |
| H11A_26 | 0.469668  | 0.038282   | 0.575814  | 0.140      |
| H11B_26 | 0.486162  | 0.027561   | 0.650234  | 0.140      |
| H11C_26 | 0.493967  | 0.112647   | 0.613728  | 0.140      |
| C12_26  | 0.3885(5) | -0.0091(5) | 0.5623(5) | 0.068(4)   |
| H12A_26 | 0.362159  | -0.004752  | 0.531069  | 0.102      |
| H12B_26 | 0.388012  | -0.063099  | 0.582682  | 0.102      |
| H12C_26 | 0.418619  | -0.001338  | 0.539368  | 0.102      |

Table S 5 Fractional Atomic Coordinates ( $\times 10^4$ ) and Equivalent Isotropic Displacement Parameters ( $\text{\AA}^2 \times 10^3$ ) for [SrHMB(oDFB)<sub>3</sub>{f-al}][al-f-al] 5.  $U_{eq}$  is defined as 1/3 of the trace of the orthogonalised  $U_{ij}$  tensor.

| Atom | x          | y          | z          | $U_{eq}$   |
|------|------------|------------|------------|------------|
| Sr1  | 0.42720(3) | 0.28821(2) | 0.28739(2) | 0.02075(8) |
| F2   | 1.000000   | 0.500000   | 0.500000   | 0.0198(6)  |
| F4   | 0.000000   | 0.500000   | 0.000000   | 0.0236(2)  |
| F3   | -0.0009(6) | 0.0041(3)  | 0.0049(2)  | 0.0237(2)  |

|      |             |              |             |            |
|------|-------------|--------------|-------------|------------|
| F1   | 0.5232(2)   | 0.24641(11)  | 0.22984(10) | 0.0424(7)  |
| F5   | 1.000000    | 0.000000     | 0.500000    | 0.0209(2)  |
| Sr2  | -0.59288(3) | 0.78935(2)   | 0.21333(2)  | 0.02347(8) |
| Al6  | 0.91780(8)  | 0.45182(4)   | 0.47353(4)  | 0.0164(2)  |
| Al2  | 0.92369(9)  | 0.00159(4)   | 0.55244(4)  | 0.0209(2)  |
| Al3  | 0.07230(9)  | 0.04994(5)   | -0.02864(4) | 0.0237(2)  |
| Al4  | 0.08020(9)  | 0.50048(5)   | 0.05150(4)  | 0.0236(2)  |
| Al5  | -0.40646(9) | 0.70892(5)   | 0.29711(4)  | 0.0213(2)  |
| Al1  | 0.60112(10) | 0.20832(5)   | 0.19870(4)  | 0.0240(2)  |
| F6   | -0.4764(2)  | 0.75031(11)  | 0.26361(10) | 0.0364(6)  |
| O1_1 | 0.9857(2)   | -0.02514(12) | 0.59970(11) | 0.0308(7)  |
| C1_1 | 1.0519(3)   | -0.05747(17) | 0.61997(14) | 0.0319(9)  |
| C2_1 | 1.1530(3)   | -0.04883(18) | 0.59399(16) | 0.0350(10) |
| F1_1 | 1.1503(2)   | -0.07288(12) | 0.55045(10) | 0.0408(7)  |
| F2_1 | 1.2276(2)   | -0.06718(14) | 0.61964(11) | 0.0488(8)  |
| F3_1 | 1.1724(2)   | 0.00221(12)  | 0.58635(11) | 0.0454(7)  |
| C3_1 | 1.0625(4)   | -0.04304(19) | 0.67517(15) | 0.0385(10) |
| F4_1 | 0.9747(2)   | -0.03568(12) | 0.69474(9)  | 0.0416(7)  |
| F5_1 | 1.1173(2)   | 0.00191(12)  | 0.68107(10) | 0.0468(7)  |
| F6_1 | 1.1049(3)   | -0.08095(13) | 0.70059(10) | 0.0497(8)  |
| C4_1 | 1.0157(4)   | -0.11639(18) | 0.61573(17) | 0.0369(10) |
| F7_1 | 0.9472(3)   | -0.12843(12) | 0.64930(11) | 0.0504(8)  |
| F8_1 | 1.0890(3)   | -0.14862(12) | 0.62128(13) | 0.0560(9)  |
| F9_1 | 0.9737(3)   | -0.12431(12) | 0.57199(11) | 0.0483(7)  |
| O1_2 | 0.8201(2)   | -0.03334(12) | 0.53322(11) | 0.0306(7)  |
| C1_2 | 0.7268(3)   | -0.04946(18) | 0.54510(15) | 0.0336(9)  |
| C2_2 | 0.7012(4)   | -0.1017(2)   | 0.51733(19) | 0.0468(12) |
| F1_2 | 0.6887(3)   | -0.09166(15) | 0.47007(12) | 0.0645(10) |
| F2_2 | 0.6179(3)   | -0.12584(15) | 0.53408(15) | 0.0703(11) |
| F3_2 | 0.7722(3)   | -0.13577(13) | 0.52243(15) | 0.0627(9)  |
| C3_2 | 0.7171(4)   | -0.0593(3)   | 0.60098(18) | 0.0559(14) |
| F4_2 | 0.7661(3)   | -0.02221(19) | 0.62580(13) | 0.0774(13) |
| F5_2 | 0.7580(3)   | -0.10569(19) | 0.61298(14) | 0.0789(12) |
| F6_2 | 0.6240(2)   | -0.06168(19) | 0.61610(13) | 0.0720(12) |
| C4_2 | 0.6534(4)   | -0.0072(2)   | 0.5302(2)   | 0.0534(13) |
| F7_2 | 0.6597(3)   | 0.03231(17)  | 0.56205(19) | 0.0857(14) |
| F8_2 | 0.5600(2)   | -0.0267(2)   | 0.53076(16) | 0.0806(13) |
| F9_2 | 0.6717(3)   | 0.01010(15)  | 0.48558(15) | 0.0678(11) |
| O1_3 | 0.8948(3)   | 0.06561(12)  | 0.56207(15) | 0.0321(9)  |
| C1_3 | 0.9180(4)   | 0.11317(17)  | 0.58324(17) | 0.0356(11) |
| C2_3 | 0.9694(4)   | 0.10653(18)  | 0.63425(17) | 0.0369(11) |
| F1_3 | 1.0625(3)   | 0.09303(14)  | 0.62806(14) | 0.0495(9)  |
| F2_3 | 0.9699(3)   | 0.15043(12)  | 0.66054(12) | 0.0493(9)  |
| F3_3 | 0.9231(3)   | 0.06854(13)  | 0.65968(13) | 0.0422(9)  |
| C3_3 | 0.8198(4)   | 0.1419(2)    | 0.58992(19) | 0.0438(12) |
| F4_3 | 0.7631(3)   | 0.13763(16)  | 0.54994(14) | 0.0603(11) |
| F5_3 | 0.7670(3)   | 0.1198(2)    | 0.62555(15) | 0.0576(11) |
| F6_3 | 0.8352(3)   | 0.19284(13)  | 0.59992(16) | 0.0630(11) |
| C4_3 | 0.9865(5)   | 0.14694(19)  | 0.54904(19) | 0.0467(13) |
| F7_3 | 0.9368(4)   | 0.16440(15)  | 0.51083(13) | 0.0597(12) |
| F8_3 | 1.0302(3)   | 0.18744(14)  | 0.57233(15) | 0.0630(11) |
| F9_3 | 1.0573(3)   | 0.11683(15)  | 0.53207(14) | 0.0572(10) |
| O1_4 | 0.9161(2)   | 0.47205(11)  | 0.41401(10) | 0.0244(6)  |
| C1_4 | 0.8862(3)   | 0.45899(16)  | 0.36811(14) | 0.0297(8)  |
| C2_4 | 0.7771(3)   | 0.43733(16)  | 0.36792(14) | 0.0300(9)  |

|       |             |             |             |            |
|-------|-------------|-------------|-------------|------------|
| F1_4  | 0.7155(2)   | 0.47613(11) | 0.37447(10) | 0.0412(6)  |
| F2_4  | 0.7504(2)   | 0.41261(12) | 0.32639(10) | 0.0459(7)  |
| F3_4  | 0.7621(2)   | 0.40343(11) | 0.40432(10) | 0.0412(7)  |
| C3_4  | 0.9518(4)   | 0.4168(2)   | 0.34637(18) | 0.0513(13) |
| F4_4  | 1.0457(2)   | 0.42559(18) | 0.35874(13) | 0.0712(11) |
| F5_4  | 0.9266(3)   | 0.36890(14) | 0.36449(13) | 0.0660(10) |
| F6_4  | 0.9443(3)   | 0.41353(19) | 0.29801(12) | 0.0736(12) |
| C4_4  | 0.8946(4)   | 0.5099(2)   | 0.33642(16) | 0.0465(12) |
| F7_4  | 0.9894(3)   | 0.52082(19) | 0.32635(13) | 0.0804(14) |
| F8_4  | 0.8452(2)   | 0.50392(14) | 0.29399(10) | 0.0581(9)  |
| F9_4  | 0.8585(3)   | 0.55032(12) | 0.35931(12) | 0.0568(9)  |
| O1_5  | 0.8116(11)  | 0.4536(7)   | 0.5064(8)   | 0.024(3)   |
| C1_5  | 0.7392(7)   | 0.4784(3)   | 0.5308(3)   | 0.024(2)   |
| C2_5  | 0.7435(5)   | 0.5380(3)   | 0.5181(3)   | 0.0322(16) |
| F1_5  | 0.8184(6)   | 0.5623(3)   | 0.5405(3)   | 0.0437(18) |
| F2_5  | 0.6609(10)  | 0.5615(5)   | 0.5309(4)   | 0.046(3)   |
| F3_5  | 0.7528(12)  | 0.5462(7)   | 0.4703(4)   | 0.044(2)   |
| C3_5  | 0.6370(5)   | 0.4536(3)   | 0.5153(3)   | 0.0319(16) |
| F4_5  | 0.6389(15)  | 0.4008(4)   | 0.5146(5)   | 0.040(2)   |
| F5_5  | 0.6098(5)   | 0.4699(3)   | 0.4713(2)   | 0.0484(16) |
| F6_5  | 0.5657(11)  | 0.4654(9)   | 0.5457(6)   | 0.047(3)   |
| C4_5  | 0.7555(6)   | 0.4704(3)   | 0.5862(3)   | 0.0362(18) |
| F7_5  | 0.7231(6)   | 0.4227(3)   | 0.6010(2)   | 0.0444(17) |
| F8_5  | 0.7099(8)   | 0.5057(3)   | 0.6131(3)   | 0.0442(19) |
| F9_5  | 0.8522(9)   | 0.4721(7)   | 0.5946(7)   | 0.049(3)   |
| O1_6  | 0.9704(2)   | 0.39244(10) | 0.47829(10) | 0.0239(6)  |
| C1_6  | 0.9759(3)   | 0.34589(14) | 0.50244(14) | 0.0243(8)  |
| C2_6  | 1.0379(3)   | 0.35362(17) | 0.55002(17) | 0.0356(10) |
| F1_6  | 1.1335(2)   | 0.35818(13) | 0.54002(13) | 0.0535(8)  |
| F2_6  | 1.0236(2)   | 0.31435(11) | 0.58120(11) | 0.0480(7)  |
| F3_6  | 1.0115(2)   | 0.39786(11) | 0.57240(10) | 0.0463(7)  |
| C3_6  | 0.8712(3)   | 0.32300(14) | 0.51550(14) | 0.0271(8)  |
| F4_6  | 0.80806(19) | 0.33029(10) | 0.47921(10) | 0.0351(6)  |
| F5_6  | 0.8360(2)   | 0.34695(10) | 0.55454(9)  | 0.0342(6)  |
| F6_6  | 0.8715(2)   | 0.27147(9)  | 0.52481(11) | 0.0396(6)  |
| C4_6  | 1.0275(4)   | 0.30667(17) | 0.46843(17) | 0.0386(10) |
| F7_6  | 0.9644(3)   | 0.28748(12) | 0.43432(11) | 0.0514(8)  |
| F8_6  | 1.0616(2)   | 0.26565(10) | 0.49257(14) | 0.0551(9)  |
| F9_6  | 1.1027(2)   | 0.33056(10) | 0.44525(12) | 0.0482(8)  |
| O1_9  | 0.1190(10)  | 0.4383(3)   | 0.0621(5)   | 0.031(2)   |
| C1_9  | 0.1008(6)   | 0.3904(4)   | 0.0829(3)   | 0.0303(19) |
| C2_9  | 0.1241(7)   | 0.3919(4)   | 0.1387(3)   | 0.044(2)   |
| F1_9  | 0.2213(4)   | 0.3976(3)   | 0.1461(2)   | 0.0609(16) |
| F2_9  | 0.0879(7)   | 0.3487(4)   | 0.1623(4)   | 0.054(2)   |
| F3_9  | 0.0866(5)   | 0.4334(2)   | 0.15974(17) | 0.0535(16) |
| C3_9  | -0.0062(6)  | 0.3700(4)   | 0.0747(3)   | 0.042(2)   |
| F4_9  | -0.0382(4)  | 0.3827(2)   | 0.0306(2)   | 0.0588(18) |
| F5_9  | -0.0662(4)  | 0.3934(2)   | 0.1063(2)   | 0.0581(16) |
| F6_9  | -0.0181(11) | 0.3179(4)   | 0.0793(4)   | 0.051(2)   |
| C4_9  | 0.1724(7)   | 0.3525(4)   | 0.0576(3)   | 0.044(2)   |
| F7_9  | 0.1395(6)   | 0.3401(2)   | 0.0129(2)   | 0.0653(18) |
| F8_9  | 0.1843(12)  | 0.3087(4)   | 0.0835(5)   | 0.060(3)   |
| F9_9  | 0.2622(4)   | 0.3755(2)   | 0.0529(3)   | 0.0583(16) |
| O1_10 | 0.0205(3)   | 0.52583(16) | 0.09925(12) | 0.0450(9)  |
| C1_10 | -0.0505(3)  | 0.55497(18) | 0.12027(15) | 0.0354(10) |

|       |              |             |              |            |
|-------|--------------|-------------|--------------|------------|
| C2_10 | -0.0221(4)   | 0.6142(2)   | 0.11596(19)  | 0.0514(13) |
| F1_10 | 0.0474(3)    | 0.62931(16) | 0.14885(14)  | 0.0737(12) |
| F2_10 | -0.0986(3)   | 0.64458(14) | 0.12346(14)  | 0.0681(10) |
| F3_10 | 0.0142(3)    | 0.62543(15) | 0.07206(12)  | 0.0668(11) |
| C3_10 | -0.1514(4)   | 0.54342(19) | 0.09416(18)  | 0.0402(10) |
| F4_10 | -0.1647(2)   | 0.49213(12) | 0.08646(12)  | 0.0496(8)  |
| F5_10 | -0.1532(2)   | 0.56677(13) | 0.05094(12)  | 0.0507(8)  |
| F6_10 | -0.2270(2)   | 0.55905(14) | 0.11984(13)  | 0.0546(8)  |
| C4_10 | -0.0564(4)   | 0.5385(2)   | 0.17455(17)  | 0.0443(11) |
| F7_10 | -0.1034(3)   | 0.49212(13) | 0.17980(12)  | 0.0543(8)  |
| F8_10 | -0.1037(3)   | 0.57321(14) | 0.20084(11)  | 0.0666(11) |
| F9_10 | 0.0342(3)    | 0.53513(15) | 0.19367(11)  | 0.0571(9)  |
| O1_11 | 0.1791(2)    | 0.53785(12) | 0.03042(11)  | 0.0301(7)  |
| C1_11 | 0.2717(3)    | 0.55740(17) | 0.04129(15)  | 0.0308(9)  |
| C2_11 | 0.3496(4)    | 0.5188(2)   | 0.0237(2)    | 0.0492(12) |
| F1_11 | 0.3543(3)    | 0.47764(14) | 0.05405(16)  | 0.0671(10) |
| F2_11 | 0.4401(2)    | 0.54217(18) | 0.02137(15)  | 0.0734(11) |
| F3_11 | 0.3280(2)    | 0.50064(16) | -0.02105(13) | 0.0613(9)  |
| C3_11 | 0.2867(4)    | 0.6110(2)   | 0.0134(2)    | 0.0506(13) |
| F4_11 | 0.2099(3)    | 0.64076(12) | 0.02009(13)  | 0.0559(8)  |
| F5_11 | 0.2968(3)    | 0.60064(17) | -0.03438(12) | 0.0679(11) |
| F6_11 | 0.3664(3)    | 0.63776(15) | 0.03052(15)  | 0.0732(12) |
| C4_11 | 0.2869(4)    | 0.5662(2)   | 0.09703(17)  | 0.0448(11) |
| F7_11 | 0.2429(3)    | 0.61045(15) | 0.11095(13)  | 0.0658(10) |
| F8_11 | 0.3821(2)    | 0.56966(15) | 0.10979(12)  | 0.0582(9)  |
| F9_11 | 0.2459(3)    | 0.52633(14) | 0.12179(11)  | 0.0556(9)  |
| C1_13 | -0.7587(3)   | 0.70897(15) | 0.28921(16)  | 0.0289(8)  |
| C2_13 | -0.7554(3)   | 0.67957(16) | 0.24707(14)  | 0.0269(8)  |
| C3_13 | -0.8064(3)   | 0.63233(19) | 0.24220(16)  | 0.0354(10) |
| H3_13 | -0.804065    | 0.612473    | 0.212793     | 0.043      |
| C4_13 | -0.8610(4)   | 0.6147(2)   | 0.28150(16)  | 0.0411(11) |
| H4_13 | -0.897763    | 0.582073    | 0.279413     | 0.049      |
| C5_13 | -0.8632(4)   | 0.64379(19) | 0.32400(16)  | 0.0415(11) |
| H5_13 | -0.901434    | 0.630719    | 0.350817     | 0.050      |
| C6_13 | -0.8106(4)   | 0.69193(18) | 0.32851(16)  | 0.0357(10) |
| H6_13 | -0.811398    | 0.711814    | 0.357939     | 0.043      |
| F1_13 | -0.7041(2)   | 0.75609(10) | 0.28929(11)  | 0.0383(6)  |
| F2_13 | -0.69806(19) | 0.70013(10) | 0.20976(10)  | 0.0322(5)  |
| C1_14 | -0.4463(3)   | 0.88857(17) | 0.27672(16)  | 0.0333(10) |
| C2_14 | -0.5207(3)   | 0.87988(16) | 0.30925(16)  | 0.0324(9)  |
| C3_14 | -0.5203(4)   | 0.9031(2)   | 0.35416(19)  | 0.0451(12) |
| H3_14 | -0.573844    | 0.897464    | 0.376217     | 0.054      |
| C4_14 | -0.4388(4)   | 0.9353(2)   | 0.3665(2)    | 0.0511(13) |
| H4_14 | -0.435782    | 0.952240    | 0.397431     | 0.061      |
| C5_14 | -0.3629(4)   | 0.9426(2)   | 0.3342(2)    | 0.0538(14) |
| H5_14 | -0.307009    | 0.964271    | 0.343587     | 0.065      |
| C6_14 | -0.3644(3)   | 0.91977(18) | 0.2885(2)    | 0.0429(11) |
| H6_14 | -0.311284    | 0.925340    | 0.266140     | 0.052      |
| F1_14 | -0.4556(2)   | 0.86405(10) | 0.23164(10)  | 0.0356(6)  |
| F2_14 | -0.5989(2)   | 0.84721(11) | 0.29449(11)  | 0.0394(6)  |
| C1_15 | 0.4778(3)    | 0.38491(18) | 0.19383(16)  | 0.0325(9)  |
| C2_15 | 0.5604(3)    | 0.39171(15) | 0.22271(14)  | 0.0266(8)  |
| C3_15 | 0.6379(3)    | 0.42440(16) | 0.20965(18)  | 0.0355(9)  |
| H3_15 | 0.694627     | 0.429245    | 0.229940     | 0.043      |
| C4_15 | 0.6303(4)    | 0.45047(19) | 0.16508(19)  | 0.0413(11) |

|       |             |             |             |            |
|-------|-------------|-------------|-------------|------------|
| H4_15 | 0.683666    | 0.473103    | 0.154378    | 0.050      |
| C5_15 | 0.5474(4)   | 0.4442(2)   | 0.1362(2)   | 0.0470(12) |
| H5_15 | 0.543365    | 0.463337    | 0.106401    | 0.056      |
| C6_15 | 0.4696(4)   | 0.4103(2)   | 0.15015(19) | 0.0458(12) |
| H6_15 | 0.412723    | 0.404934    | 0.130056    | 0.055      |
| F1_15 | 0.40455(19) | 0.35044(10) | 0.21015(10) | 0.0363(6)  |
| F2_15 | 0.56200(19) | 0.36388(10) | 0.26574(9)  | 0.0319(5)  |
| C1_16 | 0.2540(3)   | 0.18178(16) | 0.25678(15) | 0.0279(9)  |
| C2_16 | 0.2355(3)   | 0.21658(15) | 0.21965(14) | 0.0258(8)  |
| C3_16 | 0.1668(3)   | 0.20521(17) | 0.18415(16) | 0.0331(9)  |
| H3_16 | 0.154705    | 0.229532    | 0.158651    | 0.040      |
| C4_16 | 0.1154(4)   | 0.15694(19) | 0.18668(17) | 0.0379(10) |
| H4_16 | 0.067604    | 0.147640    | 0.162360    | 0.046      |
| C5_16 | 0.1331(4)   | 0.12211(19) | 0.22427(16) | 0.0370(10) |
| H5_16 | 0.096150    | 0.089484    | 0.225758    | 0.044      |
| C6_16 | 0.2038(3)   | 0.13393(18) | 0.25982(17) | 0.0333(10) |
| H6_16 | 0.216802    | 0.109753    | 0.285309    | 0.040      |
| F1_16 | 0.3237(2)   | 0.19694(10) | 0.29089(10) | 0.0366(6)  |
| F2_16 | 0.28919(19) | 0.26362(10) | 0.22049(9)  | 0.0328(6)  |
| C1_17 | 0.6290(3)   | 0.25205(15) | 0.36691(15) | 0.0288(8)  |
| C2_17 | 0.5654(3)   | 0.20951(17) | 0.37121(16) | 0.0327(9)  |
| C3_17 | 0.5829(4)   | 0.16954(19) | 0.40351(18) | 0.0397(11) |
| H3_17 | 0.537484    | 0.140162    | 0.406817    | 0.048      |
| C4_17 | 0.6682(4)   | 0.17338(19) | 0.43096(19) | 0.0403(11) |
| H4_17 | 0.682005    | 0.146367    | 0.453712    | 0.048      |
| C5_17 | 0.7342(4)   | 0.21626(18) | 0.42574(18) | 0.0415(11) |
| H5_17 | 0.793561    | 0.217753    | 0.444391    | 0.050      |
| C6_17 | 0.7153(4)   | 0.25692(18) | 0.39386(17) | 0.0372(10) |
| H6_17 | 0.759619    | 0.286779    | 0.390642    | 0.045      |
| F1_17 | 0.60366(19) | 0.29114(10) | 0.33399(9)  | 0.0333(6)  |
| F2_17 | 0.4802(2)   | 0.20943(11) | 0.34318(11) | 0.0416(7)  |
| O1_18 | -0.4479(3)  | 0.71055(17) | 0.35538(11) | 0.0460(9)  |
| C1_18 | -0.4324(3)  | 0.72367(18) | 0.40267(16) | 0.0382(10) |
| C2_18 | -0.3863(4)  | 0.6760(2)   | 0.42951(18) | 0.0467(12) |
| F1_18 | -0.4553(3)  | 0.63867(14) | 0.44037(14) | 0.0634(9)  |
| F2_18 | -0.3438(3)  | 0.69041(14) | 0.47201(11) | 0.0560(8)  |
| F3_18 | -0.3186(3)  | 0.65511(14) | 0.40221(13) | 0.0578(8)  |
| C3_18 | -0.3582(5)  | 0.7713(2)   | 0.4074(2)   | 0.0577(14) |
| F4_18 | -0.3768(3)  | 0.80604(14) | 0.37187(16) | 0.0780(12) |
| F5_18 | -0.2653(3)  | 0.75791(15) | 0.40252(13) | 0.0626(9)  |
| F6_18 | -0.3656(4)  | 0.79526(16) | 0.44993(16) | 0.0951(16) |
| C4_18 | -0.5321(4)  | 0.7354(2)   | 0.42548(19) | 0.0569(14) |
| F7_18 | -0.5609(4)  | 0.78277(17) | 0.41013(16) | 0.0825(13) |
| F8_18 | -0.5284(3)  | 0.73663(17) | 0.47401(12) | 0.0717(11) |
| F9_18 | -0.6018(3)  | 0.69986(17) | 0.41154(14) | 0.0656(10) |
| O1_19 | -0.2846(3)  | 0.7267(2)   | 0.2948(3)   | 0.0400(15) |
| C1_19 | -0.2035(4)  | 0.7389(2)   | 0.26879(19) | 0.0319(12) |
| C2_19 | -0.2135(4)  | 0.7128(2)   | 0.2175(2)   | 0.0435(13) |
| F1_19 | -0.2017(3)  | 0.66143(15) | 0.22047(19) | 0.0637(12) |
| F2_19 | -0.1500(3)  | 0.73414(18) | 0.18488(15) | 0.0566(11) |
| F3_19 | -0.3057(3)  | 0.71964(17) | 0.19967(13) | 0.0501(10) |
| C3_19 | -0.1857(4)  | 0.7992(2)   | 0.2619(2)   | 0.0431(13) |
| F4_19 | -0.1990(3)  | 0.82384(16) | 0.30419(15) | 0.0541(10) |
| F5_19 | -0.2515(3)  | 0.81733(17) | 0.22972(19) | 0.0571(12) |
| F6_19 | -0.0949(3)  | 0.81231(15) | 0.24660(17) | 0.0531(11) |

|       |            |             |              |            |
|-------|------------|-------------|--------------|------------|
| C4_19 | -0.1128(4) | 0.7163(2)   | 0.2946(2)    | 0.0495(15) |
| F7_19 | -0.0858(3) | 0.74699(18) | 0.33282(18)  | 0.0680(14) |
| F8_19 | -0.0360(3) | 0.7131(2)   | 0.2664(2)    | 0.0742(16) |
| F9_19 | -0.1365(5) | 0.6682(2)   | 0.3128(2)    | 0.0674(16) |
| O1_20 | -0.4317(4) | 0.65040(14) | 0.26770(17)  | 0.0505(12) |
| C1_20 | -0.4617(4) | 0.59901(18) | 0.26960(18)  | 0.0287(11) |
| C2_20 | -0.5077(4) | 0.5843(2)   | 0.21919(18)  | 0.0418(13) |
| F1_20 | -0.5941(5) | 0.6062(3)   | 0.21304(19)  | 0.0659(13) |
| F2_20 | -0.5227(3) | 0.53238(13) | 0.21321(15)  | 0.0503(9)  |
| F3_20 | -0.4513(4) | 0.60087(16) | 0.18298(13)  | 0.0589(11) |
| C3_20 | -0.3730(4) | 0.5642(2)   | 0.27995(18)  | 0.0354(11) |
| F4_20 | -0.3173(3) | 0.5846(2)   | 0.31543(16)  | 0.0589(13) |
| F5_20 | -0.3160(3) | 0.55981(15) | 0.24117(13)  | 0.0457(9)  |
| F6_20 | -0.4046(3) | 0.51462(18) | 0.2929(2)    | 0.0500(12) |
| C4_20 | -0.5406(4) | 0.58971(18) | 0.30995(18)  | 0.0316(11) |
| F7_20 | -0.5003(3) | 0.58511(14) | 0.35363(11)  | 0.0411(8)  |
| F8_20 | -0.5982(3) | 0.54710(14) | 0.30167(15)  | 0.0492(10) |
| F9_20 | -0.5988(2) | 0.63096(13) | 0.31180(12)  | 0.0386(8)  |
| O1_21 | 0.0867(5)  | 0.0344(3)   | -0.0885(2)   | 0.0348(14) |
| C1_21 | 0.0514(5)  | 0.0287(3)   | -0.1349(3)   | 0.0328(16) |
| C2_21 | -0.0617(5) | 0.0189(3)   | -0.1394(3)   | 0.0508(18) |
| F1_21 | -0.0905(5) | -0.0294(2)  | -0.1265(3)   | 0.089(2)   |
| F2_21 | -0.0978(4) | 0.0273(3)   | -0.1811(2)   | 0.0676(17) |
| F3_21 | -0.1027(4) | 0.0501(3)   | -0.1069(2)   | 0.0707(18) |
| C3_21 | 0.0850(6)  | 0.0784(3)   | -0.1640(3)   | 0.056(2)   |
| F4_21 | 0.1742(7)  | 0.0949(4)   | -0.1502(4)   | 0.083(2)   |
| F5_21 | 0.0256(6)  | 0.1181(3)   | -0.1544(4)   | 0.089(2)   |
| F6_21 | 0.0788(7)  | 0.0719(4)   | -0.2115(2)   | 0.080(2)   |
| C4_21 | 0.1008(6)  | -0.0205(3)  | -0.1562(3)   | 0.048(2)   |
| F7_21 | 0.1954(4)  | -0.0073(3)  | -0.1636(3)   | 0.089(2)   |
| F8_21 | 0.0609(12) | -0.0360(7)  | -0.1981(4)   | 0.070(2)   |
| F9_21 | 0.0949(7)  | -0.0599(3)  | -0.1261(4)   | 0.077(2)   |
| O1_22 | 0.1861(6)  | 0.0485(6)   | -0.0048(5)   | 0.076(4)   |
| C1_22 | 0.2771(7)  | 0.0308(3)   | 0.0016(3)    | 0.041(2)   |
| C2_22 | 0.3227(9)  | 0.0498(4)   | 0.0508(4)    | 0.072(3)   |
| F1_22 | 0.3345(8)  | 0.1023(2)   | 0.0517(4)    | 0.118(4)   |
| F2_22 | 0.4103(8)  | 0.0290(7)   | 0.0600(7)    | 0.090(3)   |
| F3_22 | 0.2680(8)  | 0.0369(4)   | 0.0886(3)    | 0.109(3)   |
| C3_22 | 0.2810(7)  | -0.0294(3)  | -0.0007(3)   | 0.051(2)   |
| F4_22 | 0.2219(6)  | -0.0479(2)  | -0.0360(2)   | 0.0663(18) |
| F5_22 | 0.2530(6)  | -0.0505(2)  | 0.0411(2)    | 0.092(3)   |
| F6_22 | 0.3708(9)  | -0.0447(7)  | -0.0103(6)   | 0.087(3)   |
| C4_22 | 0.3385(8)  | 0.0551(4)   | -0.0408(4)   | 0.073(3)   |
| F7_22 | 0.3194(6)  | 0.0289(4)   | -0.0818(3)   | 0.100(3)   |
| F8_22 | 0.4328(8)  | 0.0613(7)   | -0.0276(7)   | 0.128(4)   |
| F9_22 | 0.3162(9)  | 0.1058(3)   | -0.0484(4)   | 0.103(3)   |
| O1_23 | 0.0089(4)  | 0.10501(16) | -0.0153(2)   | 0.0379(12) |
| C1_23 | 0.0098(4)  | 0.15612(19) | -0.00217(18) | 0.0296(10) |
| C2_23 | 0.0817(5)  | 0.1664(2)   | 0.0417(2)    | 0.0506(14) |
| F1_23 | 0.1752(3)  | 0.17269(16) | 0.0264(2)    | 0.0660(12) |
| F2_23 | 0.0623(4)  | 0.20891(15) | 0.06700(16)  | 0.0750(15) |
| F3_23 | 0.0790(4)  | 0.12536(17) | 0.07181(14)  | 0.0696(13) |
| C3_23 | -0.0964(4) | 0.1689(2)   | 0.0140(2)    | 0.0434(12) |
| F4_23 | -0.1615(3) | 0.15030(15) | -0.01849(18) | 0.0575(10) |
| F5_23 | -0.1178(3) | 0.14780(16) | 0.05624(16)  | 0.0609(12) |



|        |            |             |              |            |
|--------|------------|-------------|--------------|------------|
| F6_23  | -0.1060(3) | 0.22100(13) | 0.01732(18)  | 0.0618(12) |
| C4_23  | 0.0431(4)  | 0.1913(2)   | -0.0454(2)   | 0.0460(13) |
| F7_23  | -0.0289(4) | 0.1926(2)   | -0.07881(15) | 0.0697(12) |
| F8_23  | 0.0662(4)  | 0.24091(14) | -0.03080(18) | 0.0698(13) |
| F9_23  | 0.1208(3)  | 0.17146(18) | -0.06718(15) | 0.0590(11) |
| O1_24  | 0.5585(5)  | 0.1468(2)   | 0.2176(4)    | 0.0386(18) |
| C1_24  | 0.5740(5)  | 0.0956(3)   | 0.2300(2)    | 0.0301(14) |
| C2_24  | 0.5770(6)  | 0.0612(3)   | 0.1830(3)    | 0.0486(18) |
| F1_24  | 0.4857(5)  | 0.0546(2)   | 0.1645(2)    | 0.0696(18) |
| F2_24  | 0.6094(9)  | 0.0134(3)   | 0.1934(6)    | 0.075(2)   |
| F3_24  | 0.6347(6)  | 0.0846(4)   | 0.1508(3)    | 0.071(2)   |
| C3_24  | 0.6748(6)  | 0.0914(2)   | 0.2577(2)    | 0.0426(16) |
| F4_24  | 0.6829(4)  | 0.12943(19) | 0.29192(16)  | 0.0609(15) |
| F5_24  | 0.7489(3)  | 0.09878(18) | 0.22769(19)  | 0.0497(12) |
| F6_24  | 0.6825(4)  | 0.04532(19) | 0.2802(2)    | 0.0740(19) |
| C4_24  | 0.4888(7)  | 0.0750(4)   | 0.2637(4)    | 0.057(2)   |
| F7_24  | 0.4999(7)  | 0.0982(3)   | 0.3081(3)    | 0.094(3)   |
| F8_24  | 0.4910(11) | 0.0225(3)   | 0.2689(6)    | 0.068(2)   |
| F9_24  | 0.4044(4)  | 0.0888(2)   | 0.2466(4)    | 0.087(2)   |
| O1_25  | 0.7218(3)  | 0.2180(2)   | 0.22062(18)  | 0.0271(10) |
| C1_25  | 0.8109(5)  | 0.2433(2)   | 0.2136(2)    | 0.0273(14) |
| C2_25  | 0.8811(5)  | 0.2280(3)   | 0.2563(2)    | 0.0440(16) |
| F1_25  | 0.9116(4)  | 0.1790(2)   | 0.2482(2)    | 0.0577(15) |
| F2_25  | 0.9605(3)  | 0.2599(3)   | 0.2590(2)    | 0.0668(16) |
| F3_25  | 0.8348(4)  | 0.2286(3)   | 0.29836(15)  | 0.0632(16) |
| C3_25  | 0.7984(5)  | 0.3039(3)   | 0.2143(3)    | 0.0452(15) |
| F4_25  | 0.7195(3)  | 0.31614(17) | 0.1881(2)    | 0.0576(14) |
| F5_25  | 0.7787(5)  | 0.3207(2)   | 0.2598(2)    | 0.0659(16) |
| F6_25  | 0.8747(4)  | 0.33179(18) | 0.1984(2)    | 0.0636(16) |
| C4_25  | 0.8550(6)  | 0.2276(3)   | 0.1636(3)    | 0.0344(16) |
| F7_25  | 0.8112(3)  | 0.2524(2)   | 0.12702(16)  | 0.0457(11) |
| F8_25  | 0.9518(5)  | 0.2415(3)   | 0.1616(4)    | 0.0459(16) |
| F9_25  | 0.8409(5)  | 0.17637(16) | 0.15668(18)  | 0.0534(14) |
| O1_26  | 0.5937(6)  | 0.2217(4)   | 0.1385(3)    | 0.0357(14) |
| C1_26  | 0.5391(6)  | 0.2248(3)   | 0.0978(3)    | 0.0303(15) |
| C2_26  | 0.5517(6)  | 0.1735(3)   | 0.0681(3)    | 0.0467(17) |
| F1_26  | 0.6453(5)  | 0.1629(3)   | 0.0635(3)    | 0.0647(18) |
| F2_26  | 0.5145(7)  | 0.1787(4)   | 0.0230(3)    | 0.077(2)   |
| F3_26  | 0.5051(5)  | 0.1333(2)   | 0.0886(3)    | 0.0613(16) |
| C3_26  | 0.4286(6)  | 0.2293(3)   | 0.1098(3)    | 0.0377(16) |
| F4_26  | 0.4092(11) | 0.2773(4)   | 0.1258(5)    | 0.0585(19) |
| F5_26  | 0.4017(5)  | 0.1966(3)   | 0.1459(3)    | 0.0488(19) |
| F6_26  | 0.3676(5)  | 0.2195(3)   | 0.0722(3)    | 0.0546(16) |
| C4_26  | 0.5755(5)  | 0.2731(3)   | 0.0670(3)    | 0.0413(16) |
| F7_26  | 0.5904(6)  | 0.3146(2)   | 0.0947(3)    | 0.0632(17) |
| F8_26  | 0.5117(5)  | 0.2846(3)   | 0.0321(3)    | 0.084(2)   |
| F9_26  | 0.6624(5)  | 0.2645(3)   | 0.0466(3)    | 0.062(2)   |
| C1_27  | 0.3174(4)  | 0.29663(18) | 0.38263(16)  | 0.0373(11) |
| C2_27  | 0.2429(4)  | 0.3010(2)   | 0.34759(17)  | 0.0378(11) |
| C3_27  | 0.2437(4)  | 0.3441(2)   | 0.31558(17)  | 0.0381(11) |
| C4_27  | 0.3201(4)  | 0.38296(18) | 0.31847(17)  | 0.0334(10) |
| C5_27  | 0.3946(3)  | 0.37950(16) | 0.35434(15)  | 0.0263(8)  |
| C6_27  | 0.3938(3)  | 0.33584(16) | 0.38647(14)  | 0.0269(8)  |
| C7_27  | 0.3130(6)  | 0.2514(2)   | 0.4188(2)    | 0.0620(19) |
| H7A_27 | 0.259150   | 0.256294    | 0.442058     | 0.093      |

|         |            |             |             |            |
|---------|------------|-------------|-------------|------------|
| H7B_27  | 0.375847   | 0.250578    | 0.436604    | 0.093      |
| H7C_27  | 0.301215   | 0.218069    | 0.401232    | 0.093      |
| C8_27   | 0.1575(5)  | 0.2595(3)   | 0.3449(2)   | 0.068(2)   |
| H8A_27  | 0.097478   | 0.274309    | 0.358116    | 0.101      |
| H8B_27  | 0.174211   | 0.228509    | 0.364043    | 0.101      |
| H8C_27  | 0.146192   | 0.249182    | 0.310705    | 0.101      |
| C9_27   | 0.1605(4)  | 0.3505(3)   | 0.2788(2)   | 0.0637(19) |
| H9A_27  | 0.155515   | 0.387941    | 0.270781    | 0.096      |
| H9B_27  | 0.097955   | 0.336972    | 0.292868    | 0.096      |
| H9C_27  | 0.174525   | 0.330770    | 0.248936    | 0.096      |
| C10_27  | 0.3194(5)  | 0.4293(2)   | 0.2844(2)   | 0.0523(14) |
| H10A_27 | 0.290895   | 0.459235    | 0.301095    | 0.078      |
| H10B_27 | 0.279664   | 0.419978    | 0.255413    | 0.078      |
| H10C_27 | 0.387259   | 0.439004    | 0.274382    | 0.078      |
| C11_27  | 0.4729(4)  | 0.42299(18) | 0.36080(19) | 0.0403(11) |
| H11A_27 | 0.484321   | 0.429301    | 0.395765    | 0.060      |
| H11B_27 | 0.450870   | 0.455320    | 0.345400    | 0.060      |
| H11C_27 | 0.534455   | 0.412630    | 0.345437    | 0.060      |
| C12_27  | 0.4744(5)  | 0.3346(2)   | 0.42499(18) | 0.0465(13) |
| H12A_27 | 0.455536   | 0.355506    | 0.453383    | 0.070      |
| H12B_27 | 0.536444   | 0.349533    | 0.411379    | 0.070      |
| H12C_27 | 0.483408   | 0.298123    | 0.435115    | 0.070      |
| C1_28   | -0.6462(4) | 0.87972(19) | 0.1485(2)   | 0.0452(14) |
| C2_28   | -0.6644(4) | 0.8358(2)   | 0.11883(17) | 0.0384(11) |
| C3_28   | -0.7413(3) | 0.79796(18) | 0.13079(16) | 0.0319(9)  |
| C4_28   | -0.7978(3) | 0.80563(18) | 0.17268(16) | 0.0315(9)  |
| C5_28   | -0.7787(3) | 0.84975(19) | 0.20258(17) | 0.0358(10) |
| C6_28   | -0.7019(4) | 0.88662(19) | 0.1906(2)   | 0.0425(13) |
| C7_28   | -0.5695(5) | 0.9212(3)   | 0.1333(4)   | 0.092(3)   |
| H7A_28  | -0.577255  | 0.953249    | 0.152638    | 0.137      |
| H7B_28  | -0.577885  | 0.929287    | 0.098481    | 0.137      |
| H7C_28  | -0.503332  | 0.908092    | 0.138709    | 0.137      |
| C8_28   | -0.6092(5) | 0.8294(4)   | 0.0722(2)   | 0.074(2)   |
| H8A_28  | -0.645002  | 0.845586    | 0.045397    | 0.111      |
| H8B_28  | -0.602981  | 0.791721    | 0.065483    | 0.111      |
| H8C_28  | -0.543162  | 0.846481    | 0.075245    | 0.111      |
| C9_28   | -0.7621(5) | 0.7513(2)   | 0.0978(2)   | 0.0582(16) |
| H9A_28  | -0.832094  | 0.740066    | 0.100328    | 0.087      |
| H9B_28  | -0.721096  | 0.722302    | 0.107755    | 0.087      |
| H9C_28  | -0.746852  | 0.761246    | 0.063960    | 0.087      |
| C10_28  | -0.8837(4) | 0.7678(2)   | 0.1850(3)   | 0.0571(17) |
| H10A_28 | -0.945951  | 0.785575    | 0.180623    | 0.086      |
| H10B_28 | -0.877945  | 0.756173    | 0.218987    | 0.086      |
| H10C_28 | -0.882893  | 0.737113    | 0.163199    | 0.086      |
| C11_28  | -0.8419(5) | 0.8590(3)   | 0.2465(2)   | 0.071(2)   |
| H11A_28 | -0.866724  | 0.894710    | 0.245029    | 0.106      |
| H11B_28 | -0.802470  | 0.855307    | 0.276303    | 0.106      |
| H11C_28 | -0.897770  | 0.833190    | 0.246870    | 0.106      |
| C12_28  | -0.6828(6) | 0.9352(2)   | 0.2219(3)   | 0.082(3)   |
| H12A_28 | -0.727264  | 0.962666    | 0.211894    | 0.124      |
| H12B_28 | -0.614044  | 0.948103    | 0.217785    | 0.124      |
| H12C_28 | -0.694593  | 0.926225    | 0.256332    | 0.124      |
| O1_29   | 0.5949(10) | 0.1463(4)   | 0.2159(8)   | 0.044(4)   |
| C1_29   | 0.5510(8)  | 0.0981(5)   | 0.2160(4)   | 0.042(3)   |
| C2_29   | 0.4581(8)  | 0.0971(4)   | 0.1821(4)   | 0.057(3)   |

|       |            |             |             |            |
|-------|------------|-------------|-------------|------------|
| F1_29 | 0.4863(9)  | 0.0956(5)   | 0.1353(4)   | 0.077(3)   |
| F2_29 | 0.3972(9)  | 0.0570(4)   | 0.1920(5)   | 0.081(4)   |
| F3_29 | 0.4043(7)  | 0.1383(4)   | 0.1913(4)   | 0.057(3)   |
| C3_29 | 0.5156(10) | 0.0829(6)   | 0.2679(5)   | 0.050(3)   |
| F4_29 | 0.5915(8)  | 0.0922(7)   | 0.2987(4)   | 0.090(4)   |
| F5_29 | 0.4380(9)  | 0.1106(5)   | 0.2810(5)   | 0.062(3)   |
| F6_29 | 0.483(2)   | 0.0321(6)   | 0.2703(12)  | 0.078(4)   |
| C4_29 | 0.6281(9)  | 0.0594(5)   | 0.1982(5)   | 0.050(3)   |
| F7_29 | 0.6967(8)  | 0.0512(4)   | 0.2319(4)   | 0.066(3)   |
| F8_29 | 0.5840(19) | 0.0136(7)   | 0.1856(12)  | 0.085(4)   |
| F9_29 | 0.6733(11) | 0.0781(9)   | 0.1589(6)   | 0.066(4)   |
| O1_30 | 0.8076(13) | 0.4526(9)   | 0.5023(10)  | 0.025(4)   |
| C1_30 | 0.7403(8)  | 0.4804(4)   | 0.5269(4)   | 0.025(2)   |
| C2_30 | 0.6961(7)  | 0.5211(4)   | 0.4914(3)   | 0.039(2)   |
| F1_30 | 0.6303(6)  | 0.4985(4)   | 0.4609(3)   | 0.054(2)   |
| F2_30 | 0.6527(14) | 0.5596(7)   | 0.5153(6)   | 0.053(3)   |
| F3_30 | 0.7693(13) | 0.5430(10)  | 0.4648(6)   | 0.048(3)   |
| C3_30 | 0.7877(6)  | 0.5091(3)   | 0.5710(3)   | 0.0335(19) |
| F4_30 | 0.8483(11) | 0.4797(7)   | 0.5969(8)   | 0.039(2)   |
| F5_30 | 0.8413(7)  | 0.5509(3)   | 0.5571(3)   | 0.0375(19) |
| F6_30 | 0.7207(9)  | 0.5245(4)   | 0.6031(4)   | 0.044(2)   |
| C4_30 | 0.6564(7)  | 0.4402(3)   | 0.5436(3)   | 0.035(2)   |
| F7_30 | 0.6863(7)  | 0.4152(4)   | 0.5831(3)   | 0.050(2)   |
| F8_30 | 0.5757(12) | 0.4655(9)   | 0.5546(7)   | 0.036(3)   |
| F9_30 | 0.636(2)   | 0.4066(6)   | 0.5073(6)   | 0.049(3)   |
| O1_31 | 0.7011(6)  | 0.2424(4)   | 0.2192(4)   | 0.025(2)   |
| C1_31 | 0.8007(9)  | 0.2433(4)   | 0.2219(4)   | 0.035(3)   |
| C2_31 | 0.8384(9)  | 0.2949(5)   | 0.2486(5)   | 0.056(3)   |
| F1_31 | 0.7895(10) | 0.3354(4)   | 0.2306(6)   | 0.069(3)   |
| F2_31 | 0.9335(7)  | 0.3056(5)   | 0.2393(6)   | 0.080(4)   |
| F3_31 | 0.8213(8)  | 0.2898(5)   | 0.2954(3)   | 0.065(3)   |
| C3_31 | 0.8333(9)  | 0.1939(5)   | 0.2508(4)   | 0.055(3)   |
| F4_31 | 0.8310(10) | 0.1524(4)   | 0.2211(5)   | 0.084(4)   |
| F5_31 | 0.7745(8)  | 0.1858(5)   | 0.2892(4)   | 0.066(3)   |
| F6_31 | 0.9262(9)  | 0.2036(6)   | 0.2659(5)   | 0.068(3)   |
| C4_31 | 0.8440(11) | 0.2433(6)   | 0.1696(5)   | 0.052(4)   |
| F7_31 | 0.7953(8)  | 0.2066(6)   | 0.1423(4)   | 0.069(4)   |
| F8_31 | 0.9387(11) | 0.2303(9)   | 0.1696(9)   | 0.063(4)   |
| F9_31 | 0.8331(11) | 0.2904(6)   | 0.1491(6)   | 0.094(5)   |
| C1_32 | -0.4674(3) | 0.71776(16) | 0.12011(15) | 0.0288(8)  |
| C2_32 | -0.4145(3) | 0.76525(16) | 0.11935(16) | 0.0316(9)  |
| C3_32 | -0.3366(4) | 0.7734(2)   | 0.08868(18) | 0.0443(11) |
| H3_32 | -0.299694  | 0.806056    | 0.088236    | 0.053      |
| C4_32 | -0.3125(4) | 0.7323(2)   | 0.0580(2)   | 0.0521(14) |
| H4_32 | -0.258433  | 0.736884    | 0.036150    | 0.063      |
| C5_32 | -0.3661(5) | 0.6848(2)   | 0.0589(2)   | 0.0523(14) |
| H5_32 | -0.348664  | 0.657245    | 0.037497    | 0.063      |
| C6_32 | -0.4450(4) | 0.67699(19) | 0.09059(17) | 0.0398(11) |
| H6_32 | -0.481964  | 0.644341    | 0.091640    | 0.048      |
| F1_32 | -0.5442(2) | 0.71350(11) | 0.15213(10) | 0.0378(6)  |
| F2_32 | -0.4424(2) | 0.80314(10) | 0.15170(10) | 0.0367(6)  |
| O1_33 | 0.110(2)   | 0.4365(6)   | 0.0602(10)  | 0.048(5)   |
| C1_33 | 0.1003(9)  | 0.3877(6)   | 0.0797(5)   | 0.038(3)   |
| C2_33 | 0.0004(10) | 0.3616(6)   | 0.0631(5)   | 0.046(3)   |
| F1_33 | 0.0050(7)  | 0.3437(3)   | 0.0180(3)   | 0.055(3)   |

|       |             |            |            |           |
|-------|-------------|------------|------------|-----------|
| F2_33 | -0.028(2)   | 0.3221(7)  | 0.0927(7)  | 0.061(4)  |
| F3_33 | -0.0685(7)  | 0.3981(4)  | 0.0650(5)  | 0.061(3)  |
| C3_33 | 0.1032(11)  | 0.3920(6)  | 0.1363(5)  | 0.058(4)  |
| F4_33 | 0.1777(10)  | 0.4257(4)  | 0.1495(4)  | 0.071(3)  |
| F5_33 | 0.0204(9)   | 0.4091(4)  | 0.1536(3)  | 0.069(3)  |
| F6_33 | 0.1232(14)  | 0.3458(6)  | 0.1565(8)  | 0.067(4)  |
| C4_33 | 0.1864(10)  | 0.3536(6)  | 0.0633(5)  | 0.057(4)  |
| F7_33 | 0.2700(8)   | 0.3662(5)  | 0.0872(6)  | 0.083(3)  |
| F8_33 | 0.168(2)    | 0.3024(7)  | 0.0731(10) | 0.061(4)  |
| F9_33 | 0.2020(10)  | 0.3574(4)  | 0.0156(4)  | 0.071(3)  |
| O1_34 | 0.925(4)    | 0.0659(8)  | 0.5681(18) | 0.043(8)  |
| C1_34 | 0.912(2)    | 0.1144(8)  | 0.5863(10) | 0.046(5)  |
| C2_34 | 0.869(2)    | 0.1111(12) | 0.6388(10) | 0.048(5)  |
| F1_34 | 0.885(4)    | 0.0649(14) | 0.6594(16) | 0.047(5)  |
| F2_34 | 0.911(4)    | 0.1484(15) | 0.6671(13) | 0.052(5)  |
| F3_34 | 0.772(2)    | 0.117(3)   | 0.6393(19) | 0.060(5)  |
| C3_34 | 0.842(2)    | 0.1453(11) | 0.5532(11) | 0.054(6)  |
| F4_34 | 0.889(4)    | 0.162(2)   | 0.5134(14) | 0.065(5)  |
| F5_34 | 0.764(3)    | 0.1151(17) | 0.5394(18) | 0.063(5)  |
| F6_34 | 0.809(4)    | 0.1873(14) | 0.5763(17) | 0.065(5)  |
| C4_34 | 1.016(2)    | 0.1433(11) | 0.5886(11) | 0.057(6)  |
| F7_34 | 1.063(3)    | 0.1424(19) | 0.5460(13) | 0.064(5)  |
| F8_34 | 1.008(3)    | 0.1932(11) | 0.6018(18) | 0.067(5)  |
| F9_34 | 1.071(3)    | 0.1193(18) | 0.6217(16) | 0.062(5)  |
| O1_36 | -0.449(2)   | 0.6462(5)  | 0.2971(9)  | 0.053(6)  |
| C1_36 | -0.4484(13) | 0.5989(7)  | 0.2739(6)  | 0.044(4)  |
| C2_36 | -0.3843(16) | 0.6023(8)  | 0.2270(7)  | 0.073(7)  |
| F1_36 | -0.4041(18) | 0.6458(8)  | 0.2027(8)  | 0.066(7)  |
| F2_36 | -0.407(3)   | 0.5640(9)  | 0.1949(8)  | 0.100(10) |
| F3_36 | -0.2893(15) | 0.6040(12) | 0.2397(12) | 0.097(9)  |
| C3_36 | -0.4063(16) | 0.5587(8)  | 0.3104(7)  | 0.054(5)  |
| F4_36 | -0.4774(19) | 0.5443(9)  | 0.3415(9)  | 0.070(6)  |
| F5_36 | -0.3291(19) | 0.5789(14) | 0.3350(10) | 0.069(5)  |
| F6_36 | -0.373(3)   | 0.5175(10) | 0.2864(12) | 0.056(5)  |
| C4_36 | -0.5557(14) | 0.5811(8)  | 0.2603(8)  | 0.065(6)  |
| F7_36 | -0.6157(16) | 0.5912(11) | 0.2976(9)  | 0.071(7)  |
| F8_36 | -0.566(2)   | 0.5294(9)  | 0.2533(15) | 0.101(10) |
| F9_36 | -0.586(3)   | 0.6080(18) | 0.2221(12) | 0.078(5)  |
| O1_37 | -0.2946(13) | 0.7421(11) | 0.2910(11) | 0.040(6)  |
| C1_37 | -0.2034(13) | 0.7450(7)  | 0.2711(6)  | 0.049(5)  |
| C2_37 | -0.2122(13) | 0.7589(7)  | 0.2161(6)  | 0.050(4)  |
| F1_37 | -0.247(2)   | 0.7167(8)  | 0.1918(8)  | 0.065(3)  |
| F2_37 | -0.1261(15) | 0.7732(13) | 0.1961(10) | 0.096(9)  |
| F3_37 | -0.2707(17) | 0.7980(8)  | 0.2078(9)  | 0.067(4)  |
| C3_37 | -0.1326(16) | 0.7848(8)  | 0.2988(8)  | 0.099(8)  |
| F4_37 | -0.162(3)   | 0.7877(12) | 0.3454(7)  | 0.129(11) |
| F5_37 | -0.134(3)   | 0.8330(9)  | 0.2813(13) | 0.129(13) |
| F6_37 | -0.0409(16) | 0.7666(15) | 0.2978(14) | 0.157(13) |
| C4_37 | -0.1524(18) | 0.6912(8)  | 0.2744(8)  | 0.083(6)  |
| F7_37 | -0.121(3)   | 0.6837(12) | 0.3197(9)  | 0.071(5)  |
| F8_37 | -0.076(2)   | 0.6905(14) | 0.2447(10) | 0.103(9)  |
| F9_37 | -0.209(3)   | 0.6506(10) | 0.2607(14) | 0.130(10) |
| O1_38 | 0.1824(9)   | 0.0486(8)  | 0.0041(4)  | 0.027(3)  |
| C1_38 | 0.2791(11)  | 0.0364(5)  | 0.0027(5)  | 0.042(3)  |
| C2_38 | 0.3200(11)  | 0.0369(6)  | 0.0566(5)  | 0.056(3)  |

|       |             |             |             |            |
|-------|-------------|-------------|-------------|------------|
| F1_38 | 0.2927(10)  | 0.0812(5)   | 0.0783(5)   | 0.072(3)   |
| F2_38 | 0.4184(11)  | 0.0349(12)  | 0.0564(12)  | 0.073(4)   |
| F3_38 | 0.2776(8)   | -0.0029(5)  | 0.0809(4)   | 0.068(3)   |
| C3_38 | 0.2872(11)  | -0.0195(5)  | -0.0186(5)  | 0.057(4)   |
| F4_38 | 0.2840(11)  | -0.0206(6)  | -0.0668(4)  | 0.098(5)   |
| F5_38 | 0.2072(9)   | -0.0483(4)  | -0.0044(6)  | 0.075(3)   |
| F6_38 | 0.3648(16)  | -0.0431(13) | -0.0009(11) | 0.082(4)   |
| C4_38 | 0.3464(10)  | 0.0754(5)   | -0.0271(5)  | 0.066(4)   |
| F7_38 | 0.3052(15)  | 0.0871(7)   | -0.0698(5)  | 0.087(4)   |
| F8_38 | 0.4315(13)  | 0.0539(12)  | -0.0388(11) | 0.111(5)   |
| F9_38 | 0.3601(9)   | 0.1209(4)   | -0.0066(5)  | 0.094(4)   |
| O1_12 | 0.0425(15)  | 0.0403(8)   | -0.0881(5)  | 0.069(5)   |
| C1_12 | 0.0545(10)  | 0.0340(5)   | -0.1365(5)  | 0.048(3)   |
| C2_12 | 0.1439(11)  | 0.0638(6)   | -0.1611(6)  | 0.072(3)   |
| F1_12 | 0.1611(17)  | 0.1098(7)   | -0.1397(10) | 0.082(4)   |
| F2_12 | 0.1262(15)  | 0.0675(10)  | -0.2086(6)  | 0.100(5)   |
| F3_12 | 0.2270(10)  | 0.0401(6)   | -0.1607(8)  | 0.121(6)   |
| C3_12 | 0.0628(11)  | -0.0248(5)  | -0.1492(6)  | 0.053(4)   |
| F4_12 | -0.0163(13) | -0.0504(5)  | -0.1320(6)  | 0.105(6)   |
| F5_12 | 0.1420(13)  | -0.0468(7)  | -0.1309(7)  | 0.076(4)   |
| F6_12 | 0.069(3)    | -0.0319(15) | -0.1974(6)  | 0.069(4)   |
| C4_12 | -0.0375(11) | 0.0589(6)   | -0.1596(6)  | 0.088(4)   |
| F7_12 | -0.1226(11) | 0.0553(7)   | -0.1371(7)  | 0.106(4)   |
| F8_12 | -0.0578(12) | 0.0364(7)   | -0.2035(6)  | 0.096(4)   |
| F9_12 | -0.0175(14) | 0.1106(5)   | -0.1547(10) | 0.101(4)   |
| O1_35 | 0.601(3)    | 0.218(2)    | 0.1374(6)   | 0.0357(14) |
| C1_35 | 0.538(2)    | 0.2284(10)  | 0.1003(8)   | 0.036(3)   |
| C2_35 | 0.592(2)    | 0.2197(13)  | 0.0511(9)   | 0.046(5)   |
| F1_35 | 0.644(4)    | 0.2631(18)  | 0.039(2)    | 0.060(5)   |
| F2_35 | 0.530(4)    | 0.209(2)    | 0.0143(12)  | 0.074(5)   |
| F3_35 | 0.652(4)    | 0.1804(19)  | 0.0542(19)  | 0.058(4)   |
| C3_35 | 0.445(2)    | 0.1908(11)  | 0.1043(13)  | 0.047(4)   |
| F4_35 | 0.414(5)    | 0.188(2)    | 0.1504(16)  | 0.049(5)   |
| F5_35 | 0.467(3)    | 0.1427(11)  | 0.090(2)    | 0.058(5)   |
| F6_35 | 0.370(3)    | 0.206(2)    | 0.078(2)    | 0.052(4)   |
| C4_35 | 0.509(2)    | 0.2867(10)  | 0.1040(11)  | 0.052(5)   |
| F7_35 | 0.437(3)    | 0.2935(17)  | 0.1359(17)  | 0.059(4)   |
| F8_35 | 0.481(4)    | 0.3045(16)  | 0.0606(14)  | 0.081(11)  |
| F9_35 | 0.588(3)    | 0.3159(14)  | 0.1181(19)  | 0.054(4)   |
| O1_39 | 0.5682(13)  | 0.2136(8)   | 0.1360(6)   | 0.0357(14) |
| C1_39 | 0.5406(9)   | 0.2418(5)   | 0.0962(4)   | 0.033(3)   |
| C2_39 | 0.4268(9)   | 0.2496(6)   | 0.0980(5)   | 0.042(3)   |
| F1_39 | 0.3801(8)   | 0.2047(4)   | 0.1113(5)   | 0.049(2)   |
| F2_39 | 0.3910(8)   | 0.2669(4)   | 0.0559(3)   | 0.051(3)   |
| F3_39 | 0.409(2)    | 0.2842(9)   | 0.1331(9)   | 0.055(3)   |
| C3_39 | 0.5963(10)  | 0.2967(5)   | 0.0969(5)   | 0.051(3)   |
| F4_39 | 0.6875(7)   | 0.2934(4)   | 0.0795(4)   | 0.052(2)   |
| F5_39 | 0.6032(9)   | 0.3153(4)   | 0.1424(4)   | 0.049(2)   |
| F6_39 | 0.5498(9)   | 0.3320(4)   | 0.0711(4)   | 0.052(2)   |
| C4_39 | 0.5685(10)  | 0.2126(5)   | 0.0483(4)   | 0.043(3)   |
| F7_39 | 0.6591(9)   | 0.1964(5)   | 0.0511(5)   | 0.055(3)   |
| F8_39 | 0.5648(10)  | 0.2457(5)   | 0.0104(3)   | 0.057(3)   |
| F9_39 | 0.5093(13)  | 0.1707(6)   | 0.0424(6)   | 0.065(3)   |
| O1_40 | 0.032(3)    | 0.1038(10)  | -0.0082(16) | 0.045(7)   |
| C1_40 | 0.0223(14)  | 0.1555(9)   | 0.0004(7)   | 0.043(4)   |

|       |             |            |             |           |
|-------|-------------|------------|-------------|-----------|
| C2_40 | -0.0626(17) | 0.1652(9)  | 0.0368(9)   | 0.053(5)  |
| F1_40 | -0.1491(17) | 0.1542(11) | 0.0153(12)  | 0.054(4)  |
| F2_40 | -0.059(3)   | 0.2144(10) | 0.0533(14)  | 0.091(11) |
| F3_40 | -0.056(3)   | 0.1341(15) | 0.0755(11)  | 0.090(10) |
| C3_40 | 0.1195(16)  | 0.1792(10) | 0.0234(9)   | 0.064(4)  |
| F4_40 | 0.1952(17)  | 0.1640(12) | -0.0029(13) | 0.064(5)  |
| F5_40 | 0.129(3)    | 0.1641(15) | 0.0694(9)   | 0.109(11) |
| F6_40 | 0.122(3)    | 0.2313(9)  | 0.0235(16)  | 0.103(11) |
| C4_40 | 0.0036(19)  | 0.1856(10) | -0.0479(8)  | 0.061(4)  |
| F7_40 | 0.085(2)    | 0.1891(13) | -0.0745(10) | 0.059(4)  |
| F8_40 | -0.022(3)   | 0.2343(10) | -0.0366(14) | 0.102(11) |
| F9_40 | -0.068(2)   | 0.1617(14) | -0.0741(11) | 0.072(5)  |

Table S 6 Fractional Atomic Coordinates ( $\times 10^4$ ) and Equivalent Isotropic Displacement Parameters ( $\text{\AA}^2 \times 10^3$ ) for  $[\text{SrHMB}(\text{oDFB})_4][\text{al-f-al}]_2 \cdot 6$ .  $U_{\text{eq}}$  is defined as 1/3 of the trace of the orthogonalised  $U_{ij}$  tensor.

| Atom  | x           | y           | z           | $U_{\text{eq}}$ |
|-------|-------------|-------------|-------------|-----------------|
| O1_19 | 0.3015(13)  | 0.0574(15)  | 0.9827(12)  | 0.025(5)        |
| C1_19 | 0.2274(10)  | 0.0276(6)   | 1.0108(5)   | 0.025(3)        |
| C2_19 | 0.1335(6)   | 0.0671(6)   | 0.9804(4)   | 0.038(2)        |
| F1_19 | 0.1268(11)  | 0.0501(7)   | 0.9280(5)   | 0.058(3)        |
| F2_19 | 0.0552(6)   | 0.0511(6)   | 1.0152(5)   | 0.056(2)        |
| F3_19 | 0.128(3)    | 0.1336(8)   | 0.9748(15)  | 0.046(4)        |
| C3_19 | 0.2204(7)   | 0.0349(5)   | 1.0770(4)   | 0.033(2)        |
| F4_19 | 0.3077(12)  | 0.0240(13)  | 1.1000(12)  | 0.040(4)        |
| F5_19 | 0.1717(12)  | 0.0950(6)   | 1.0848(6)   | 0.053(3)        |
| F6_19 | 0.1660(11)  | -0.0079(7)  | 1.1083(9)   | 0.047(3)        |
| C4_19 | 0.2463(9)   | -0.0488(6)  | 1.0050(5)   | 0.053(3)        |
| F7_19 | 0.3112(11)  | -0.0822(7)  | 1.0444(5)   | 0.063(3)        |
| F8_19 | 0.1686(9)   | -0.0781(7)  | 1.0153(7)   | 0.068(3)        |
| F9_19 | 0.2897(12)  | -0.0578(10) | 0.9525(7)   | 0.052(4)        |
| O1_18 | 0.1025(13)  | 0.6915(9)   | 0.2011(3)   | 0.030(2)        |
| C1_18 | 0.1326(6)   | 0.7165(4)   | 0.1455(4)   | 0.0319(19)      |
| C2_18 | 0.1022(4)   | 0.6694(3)   | 0.1062(2)   | 0.0413(12)      |
| F1_18 | 0.0065(2)   | 0.6857(2)   | 0.09658(14) | 0.0523(10)      |
| F2_18 | 0.1475(7)   | 0.6765(6)   | 0.0525(3)   | 0.0561(17)      |
| F3_18 | 0.1220(7)   | 0.6069(4)   | 0.1359(4)   | 0.065(2)        |
| C3_18 | 0.2466(4)   | 0.7095(3)   | 0.1428(2)   | 0.0508(14)      |
| F4_18 | 0.2710(11)  | 0.7391(7)   | 0.1876(6)   | 0.079(3)        |
| F5_18 | 0.2868(3)   | 0.6447(3)   | 0.1486(2)   | 0.0620(13)      |
| F6_18 | 0.2786(6)   | 0.7437(3)   | 0.0931(3)   | 0.0580(16)      |
| C4_18 | 0.0836(5)   | 0.7905(3)   | 0.1240(2)   | 0.0449(13)      |
| F7_18 | 0.1276(4)   | 0.8339(2)   | 0.14672(18) | 0.0686(13)      |
| F8_18 | 0.0941(9)   | 0.8050(7)   | 0.0651(4)   | 0.057(3)        |
| F9_18 | -0.0112(6)  | 0.8015(5)   | 0.1390(4)   | 0.0515(16)      |
| O1_17 | 0.43293(11) | 0.12486(7)  | 1.03138(6)  | 0.0286(3)       |
| C1_17 | 0.43820(14) | 0.18793(10) | 1.04171(9)  | 0.0246(4)       |
| C2_17 | 0.51225(17) | 0.22217(12) | 0.99758(11) | 0.0354(5)       |
| F1_17 | 0.47242(11) | 0.24724(7)  | 0.94600(6)  | 0.0441(3)       |
| F2_17 | 0.54163(12) | 0.27312(8)  | 1.01755(7)  | 0.0524(4)       |
| F3_17 | 0.59107(11) | 0.17753(8)  | 0.98869(7)  | 0.0532(4)       |
| C3_17 | 0.47308(15) | 0.18064(11) | 1.10548(10) | 0.0287(4)       |
| F4_17 | 0.42710(9)  | 0.13758(6)  | 1.14263(5)  | 0.0314(3)       |
| F5_17 | 0.56857(9)  | 0.15611(8)  | 1.10808(6)  | 0.0419(3)       |
| F6_17 | 0.45782(11) | 0.23949(7)  | 1.12559(6)  | 0.0451(4)       |

|       |             |              |             |            |
|-------|-------------|--------------|-------------|------------|
| C4_17 | 0.33613(17) | 0.23369(12)  | 1.03619(11) | 0.0349(5)  |
| F7_17 | 0.27753(10) | 0.21782(8)   | 1.08335(7)  | 0.0474(4)  |
| F8_17 | 0.34095(12) | 0.29930(7)   | 1.03165(7)  | 0.0531(4)  |
| F9_17 | 0.29271(11) | 0.22488(8)   | 0.98905(7)  | 0.0468(4)  |
| O1_16 | 0.3060(3)   | 0.0480(4)    | 0.9829(3)   | 0.0233(10) |
| C1_16 | 0.2291(3)   | 0.02422(19)  | 1.01383(16) | 0.0219(8)  |
| C2_16 | 0.1869(2)   | -0.02092(16) | 0.97765(13) | 0.0385(7)  |
| F1_16 | 0.1350(3)   | 0.01759(15)  | 0.93376(12) | 0.0501(7)  |
| F2_16 | 0.1261(2)   | -0.05782(16) | 1.01056(15) | 0.0564(8)  |
| F3_16 | 0.2559(3)   | -0.0613(3)   | 0.95378(17) | 0.0487(8)  |
| C3_16 | 0.26231(18) | -0.01818(13) | 1.07410(11) | 0.0255(6)  |
| F4_16 | 0.3246(3)   | 0.0129(3)    | 1.0965(3)   | 0.0301(7)  |
| F5_16 | 0.3094(2)   | -0.07900(16) | 1.06755(11) | 0.0412(6)  |
| F6_16 | 0.1889(2)   | -0.02592(16) | 1.11369(18) | 0.0365(7)  |
| C4_16 | 0.14893(19) | 0.08490(15)  | 1.02540(13) | 0.0325(7)  |
| F7_16 | 0.1771(2)   | 0.11457(13)  | 1.06772(13) | 0.0397(7)  |
| F8_16 | 0.06224(14) | 0.06707(13)  | 1.04257(11) | 0.0493(6)  |
| F9_16 | 0.1365(6)   | 0.13160(19)  | 0.9771(3)   | 0.0428(10) |
| O1_15 | 0.45200(10) | 0.10985(7)   | 0.91158(6)  | 0.0234(3)  |
| C1_15 | 0.43558(14) | 0.11826(10)  | 0.85314(8)  | 0.0221(4)  |
| C2_15 | 0.34250(16) | 0.17223(11)  | 0.83809(9)  | 0.0298(5)  |
| F1_15 | 0.36084(10) | 0.23459(6)   | 0.83782(6)  | 0.0406(3)  |
| F2_15 | 0.30929(10) | 0.17028(7)   | 0.78544(6)  | 0.0386(3)  |
| F3_15 | 0.27063(9)  | 0.16211(7)   | 0.87814(6)  | 0.0387(3)  |
| C3_15 | 0.42185(16) | 0.04991(11)  | 0.83578(9)  | 0.0282(4)  |
| F4_15 | 0.48568(10) | -0.00066(6)  | 0.86262(6)  | 0.0386(3)  |
| F5_15 | 0.33239(10) | 0.03615(7)   | 0.85212(6)  | 0.0365(3)  |
| F6_15 | 0.43374(11) | 0.04998(7)   | 0.77776(6)  | 0.0397(3)  |
| C4_15 | 0.52593(16) | 0.14378(11)  | 0.81841(9)  | 0.0294(5)  |
| F7_15 | 0.60039(9)  | 0.09243(7)   | 0.81608(6)  | 0.0382(3)  |
| F8_15 | 0.50550(10) | 0.17114(7)   | 0.76256(6)  | 0.0402(3)  |
| F9_15 | 0.55717(10) | 0.18922(7)   | 0.84340(6)  | 0.0360(3)  |
| O1_14 | 0.30178(11) | 0.03841(9)   | 0.51444(10) | 0.0273(4)  |
| C1_14 | 0.21374(19) | 0.01961(14)  | 0.51190(12) | 0.0186(5)  |
| C2_14 | 0.2229(3)   | -0.03762(18) | 0.47470(17) | 0.0321(8)  |
| F1_14 | 0.2317(3)   | -0.01280(17) | 0.41761(14) | 0.0454(8)  |
| F2_14 | 0.1468(2)   | -0.07080(16) | 0.48347(15) | 0.0420(7)  |
| F3_14 | 0.3030(2)   | -0.08287(16) | 0.48825(16) | 0.0484(7)  |
| C3_14 | 0.1761(2)   | -0.00535(15) | 0.57586(12) | 0.0283(6)  |
| F4_14 | 0.19184(18) | 0.03563(10)  | 0.61182(8)  | 0.0446(5)  |
| F5_14 | 0.22384(13) | -0.06725(8)  | 0.59631(7)  | 0.0381(4)  |
| F6_14 | 0.08121(12) | -0.00852(9)  | 0.57911(7)  | 0.0452(5)  |
| C4_14 | 0.1385(2)   | 0.08136(16)  | 0.48392(15) | 0.0277(7)  |
| F7_14 | 0.10825(13) | 0.12392(9)   | 0.52151(9)  | 0.0409(5)  |
| F8_14 | 0.06003(12) | 0.06214(9)   | 0.46588(10) | 0.0459(5)  |
| F9_14 | 0.17961(11) | 0.11589(7)   | 0.43694(7)  | 0.0347(4)  |
| O1_13 | 0.43482(10) | 0.11344(6)   | 0.54590(6)  | 0.0226(3)  |
| C1_13 | 0.41136(14) | 0.17277(9)   | 0.56730(9)  | 0.0206(4)  |
| C2_13 | 0.47718(16) | 0.22385(11)  | 0.53561(11) | 0.0315(5)  |
| F1_13 | 0.44609(10) | 0.24984(6)   | 0.48155(6)  | 0.0384(3)  |
| F2_13 | 0.47789(11) | 0.27519(7)   | 0.56453(7)  | 0.0453(4)  |
| F3_13 | 0.56920(9)  | 0.19260(7)   | 0.53073(7)  | 0.0460(4)  |
| C3_13 | 0.42880(17) | 0.15805(11)  | 0.63408(10) | 0.0313(5)  |
| F4_13 | 0.39168(11) | 0.10340(7)   | 0.65990(6)  | 0.0413(3)  |
| F5_13 | 0.52526(11) | 0.14473(8)   | 0.64330(7)  | 0.0457(4)  |

|       |             |             |             |           |
|-------|-------------|-------------|-------------|-----------|
| F6_13 | 0.38792(11) | 0.20947(7)  | 0.66107(6)  | 0.0397(3) |
| C4_13 | 0.30189(15) | 0.20468(10) | 0.55747(10) | 0.0275(4) |
| F7_13 | 0.24290(9)  | 0.17162(7)  | 0.59597(6)  | 0.0374(3) |
| F8_13 | 0.28296(9)  | 0.26997(6)  | 0.56258(6)  | 0.0348(3) |
| F9_13 | 0.27852(9)  | 0.19937(7)  | 0.50333(6)  | 0.0344(3) |
| O1_12 | 0.4134(2)   | 0.1154(2)   | 0.42501(12) | 0.0272(7) |
| C1_12 | 0.4426(2)   | 0.12566(16) | 0.36800(15) | 0.0189(7) |
| C2_12 | 0.3523(3)   | 0.1613(2)   | 0.33167(18) | 0.0264(8) |
| F1_12 | 0.2917(4)   | 0.1174(3)   | 0.33013(19) | 0.0381(9) |
| F2_12 | 0.3774(2)   | 0.18660(15) | 0.27650(11) | 0.0399(6) |
| F3_12 | 0.3020(3)   | 0.21152(19) | 0.35699(12) | 0.0324(6) |
| C3_12 | 0.5223(2)   | 0.17267(16) | 0.35915(14) | 0.0296(7) |
| F4_12 | 0.58525(13) | 0.15455(9)  | 0.40206(11) | 0.0426(6) |
| F5_12 | 0.4815(4)   | 0.23736(18) | 0.35982(19) | 0.0374(8) |
| F6_12 | 0.57341(15) | 0.17015(10) | 0.30799(11) | 0.0458(6) |
| C4_12 | 0.4859(2)   | 0.05733(17) | 0.34736(14) | 0.0246(6) |
| F7_12 | 0.57593(12) | 0.03448(9)  | 0.36814(10) | 0.0320(4) |
| F8_12 | 0.49351(19) | 0.06216(11) | 0.28902(9)  | 0.0395(5) |
| F9_12 | 0.4316(3)   | 0.0106(2)   | 0.36910(18) | 0.0318(8) |
| O1_11 | 0.30932(10) | 0.51218(8)  | 0.37276(6)  | 0.0309(3) |
| C1_11 | 0.27544(14) | 0.49100(10) | 0.42797(9)  | 0.0231(4) |
| C2_11 | 0.30491(16) | 0.53618(12) | 0.46954(11) | 0.0333(5) |
| F1_11 | 0.39979(9)  | 0.52033(7)  | 0.48041(7)  | 0.0437(3) |
| F2_11 | 0.25422(11) | 0.53012(8)  | 0.52146(6)  | 0.0479(4) |
| F3_11 | 0.28806(10) | 0.60113(7)  | 0.44544(7)  | 0.0459(4) |
| C3_11 | 0.16213(15) | 0.49676(11) | 0.42999(9)  | 0.0261(4) |
| F4_11 | 0.13496(9)  | 0.47428(7)  | 0.38384(6)  | 0.0347(3) |
| F5_11 | 0.11945(9)  | 0.56124(6)  | 0.42674(6)  | 0.0342(3) |
| F6_11 | 0.12693(10) | 0.46175(7)  | 0.47858(6)  | 0.0398(3) |
| C4_11 | 0.32264(17) | 0.41606(11) | 0.44934(11) | 0.0342(5) |
| F7_11 | 0.27978(11) | 0.37387(7)  | 0.42548(7)  | 0.0486(4) |
| F8_11 | 0.31563(12) | 0.39929(7)  | 0.50749(6)  | 0.0497(4) |
| F9_11 | 0.41694(10) | 0.40592(7)  | 0.43274(7)  | 0.0435(3) |
| O1_10 | 0.26816(10) | 0.48303(7)  | 0.25808(7)  | 0.0276(3) |
| C1_10 | 0.29433(14) | 0.42693(10) | 0.23243(9)  | 0.0239(4) |
| C2_10 | 0.2824(2)   | 0.44645(12) | 0.16518(11) | 0.0432(6) |
| F1_10 | 0.18794(13) | 0.46244(8)  | 0.15245(7)  | 0.0554(4) |
| F2_10 | 0.32350(16) | 0.39607(9)  | 0.13669(7)  | 0.0684(5) |
| F3_10 | 0.32439(14) | 0.50009(8)  | 0.14417(7)  | 0.0609(5) |
| C3_10 | 0.40142(16) | 0.39220(11) | 0.24532(11) | 0.0339(5) |
| F4_10 | 0.42077(10) | 0.39390(8)  | 0.30061(7)  | 0.0461(4) |
| F5_10 | 0.46499(10) | 0.42506(7)  | 0.21051(8)  | 0.0508(4) |
| F6_10 | 0.41950(10) | 0.32790(7)  | 0.23728(7)  | 0.0455(4) |
| C4_10 | 0.22422(16) | 0.37600(11) | 0.25872(11) | 0.0327(5) |
| F7_10 | 0.24712(11) | 0.34793(7)  | 0.31302(7)  | 0.0471(4) |
| F8_10 | 0.22715(11) | 0.32623(7)  | 0.22732(8)  | 0.0502(4) |
| F9_10 | 0.13184(9)  | 0.40762(7)  | 0.26060(8)  | 0.0466(4) |
| O1_9  | 0.4110(3)   | 0.5611(3)   | 0.2699(3)   | 0.0228(9) |
| C1_9  | 0.4946(3)   | 0.58524(18) | 0.27654(16) | 0.0233(8) |
| C2_9  | 0.5401(3)   | 0.6044(2)   | 0.21372(18) | 0.0307(9) |
| F1_9  | 0.49209(16) | 0.66257(11) | 0.18600(11) | 0.0401(5) |
| F2_9  | 0.63430(16) | 0.61098(14) | 0.21458(13) | 0.0458(6) |
| F3_9  | 0.5360(2)   | 0.55700(15) | 0.18100(14) | 0.0404(6) |
| C3_9  | 0.5673(3)   | 0.5291(2)   | 0.31330(18) | 0.0308(9) |
| F4_9  | 0.52246(12) | 0.49871(12) | 0.36060(8)  | 0.0372(5) |



|      |              |             |             |            |
|------|--------------|-------------|-------------|------------|
| F5_9 | 0.60559(17)  | 0.48114(10) | 0.28164(9)  | 0.0454(5)  |
| F6_9 | 0.64107(16)  | 0.55347(13) | 0.33127(13) | 0.0491(6)  |
| C4_9 | 0.4728(3)    | 0.6484(2)   | 0.30711(19) | 0.0359(9)  |
| F7_9 | 0.45658(19)  | 0.63032(11) | 0.36538(9)  | 0.0492(6)  |
| F8_9 | 0.5459(3)    | 0.68416(19) | 0.29942(18) | 0.0530(9)  |
| F9_9 | 0.39307(16)  | 0.68910(11) | 0.28666(12) | 0.0508(6)  |
| O1_8 | 0.0980(13)   | 0.7033(9)   | 0.2028(4)   | 0.035(3)   |
| C1_8 | 0.1322(6)    | 0.7230(4)   | 0.1471(4)   | 0.0264(18) |
| C2_8 | 0.0451(4)    | 0.7719(3)   | 0.1166(2)   | 0.0311(11) |
| F1_8 | -0.0200(2)   | 0.7376(2)   | 0.10245(14) | 0.0510(11) |
| F2_8 | 0.0724(9)    | 0.8113(7)   | 0.0674(4)   | 0.0413(17) |
| F3_8 | 0.0008(7)    | 0.8124(6)   | 0.1530(4)   | 0.054(2)   |
| C3_8 | 0.2196(4)    | 0.7619(3)   | 0.1494(2)   | 0.0455(14) |
| F4_8 | 0.2827(11)   | 0.7233(7)   | 0.1889(6)   | 0.071(3)   |
| F5_8 | 0.1880(4)    | 0.8217(3)   | 0.1639(2)   | 0.0692(14) |
| F6_8 | 0.2672(6)    | 0.7726(3)   | 0.0974(3)   | 0.0539(15) |
| C4_8 | 0.1666(5)    | 0.6644(3)   | 0.1126(3)   | 0.0556(16) |
| F7_8 | 0.2544(4)    | 0.6324(3)   | 0.1266(3)   | 0.098(2)   |
| F8_8 | 0.1745(8)    | 0.6836(7)   | 0.0556(4)   | 0.071(2)   |
| F9_8 | 0.1034(7)    | 0.6184(4)   | 0.1197(4)   | 0.062(2)   |
| O1_7 | 0.01167(9)   | 0.64430(7)  | 0.31030(6)  | 0.0193(3)  |
| C1_7 | -0.07898(12) | 0.62864(9)  | 0.30738(8)  | 0.0176(4)  |
| C2_7 | -0.07481(14) | 0.57368(10) | 0.26778(9)  | 0.0252(4)  |
| F1_7 | -0.07108(10) | 0.60045(7)  | 0.21079(5)  | 0.0347(3)  |
| F2_7 | -0.15277(9)  | 0.54177(6)  | 0.27717(6)  | 0.0343(3)  |
| F3_7 | 0.00463(9)   | 0.52679(6)  | 0.27778(6)  | 0.0365(3)  |
| C3_7 | -0.11488(13) | 0.60118(10) | 0.37102(9)  | 0.0210(4)  |
| F4_7 | -0.09320(8)  | 0.63755(6)  | 0.40927(5)  | 0.0264(3)  |
| F5_7 | -0.07077(9)  | 0.53704(6)  | 0.38796(5)  | 0.0278(3)  |
| F6_7 | -0.21115(8)  | 0.60131(6)  | 0.37530(6)  | 0.0305(3)  |
| C4_7 | -0.15204(13) | 0.69307(10) | 0.28200(9)  | 0.0224(4)  |
| F7_7 | -0.17389(9)  | 0.73467(6)  | 0.32150(6)  | 0.0303(3)  |
| F8_7 | -0.23525(8)  | 0.67760(6)  | 0.26685(6)  | 0.0326(3)  |
| F9_7 | -0.11227(8)  | 0.72731(6)  | 0.23460(5)  | 0.0290(3)  |
| O1_6 | 0.15067(10)  | 0.73196(7)  | 0.31059(7)  | 0.0314(3)  |
| C1_6 | 0.12907(14)  | 0.78421(9)  | 0.34131(9)  | 0.0228(4)  |
| C2_6 | 0.22731(15)  | 0.80827(10) | 0.34920(10) | 0.0268(4)  |
| F1_6 | 0.28164(9)   | 0.76252(7)  | 0.38767(6)  | 0.0365(3)  |
| F2_6 | 0.21267(9)   | 0.86724(6)  | 0.36919(6)  | 0.0346(3)  |
| F3_6 | 0.27903(9)   | 0.81593(6)  | 0.29875(6)  | 0.0317(3)  |
| C3_6 | 0.05784(15)  | 0.84368(10) | 0.30718(10) | 0.0275(4)  |
| F4_6 | -0.01311(9)  | 0.81956(7)  | 0.28543(6)  | 0.0379(3)  |
| F5_6 | 0.10377(10)  | 0.87739(6)  | 0.26189(6)  | 0.0364(3)  |
| F6_6 | 0.01561(10)  | 0.88837(6)  | 0.34119(6)  | 0.0358(3)  |
| C4_6 | 0.08062(15)  | 0.76139(10) | 0.40261(10) | 0.0285(5)  |
| F7_6 | -0.01374(9)  | 0.75887(6)  | 0.39858(6)  | 0.0333(3)  |
| F8_6 | 0.08693(10)  | 0.80314(7)  | 0.44087(6)  | 0.0363(3)  |
| F9_6 | 0.12413(10)  | 0.69986(7)  | 0.42611(7)  | 0.0444(4)  |
| C1   | 0.89870(16)  | 0.37912(11) | 0.14900(10) | 0.0289(5)  |
| C2   | 0.96402(15)  | 0.33384(11) | 0.11936(9)  | 0.0272(4)  |
| C3   | 0.93010(15)  | 0.28184(11) | 0.09768(9)  | 0.0263(4)  |
| C4   | 0.83022(16)  | 0.27406(11) | 0.10601(10) | 0.0290(5)  |
| C5   | 0.76508(15)  | 0.31892(12) | 0.13673(10) | 0.0313(5)  |
| C6   | 0.79908(15)  | 0.37157(11) | 0.15830(10) | 0.0300(5)  |
| C7   | 0.93412(19)  | 0.43811(13) | 0.16797(12) | 0.0419(6)  |

|      |             |             |             |           |
|------|-------------|-------------|-------------|-----------|
| H7A  | 0.957656    | 0.467070    | 0.133204    | 0.063     |
| H7B  | 0.987695    | 0.420973    | 0.195014    | 0.063     |
| H7C  | 0.880003    | 0.464559    | 0.187991    | 0.063     |
| C8   | 1.06987(17) | 0.34290(13) | 0.10869(12) | 0.0376(5) |
| H8A  | 1.110196    | 0.299510    | 0.103199    | 0.056     |
| H8B  | 1.091983    | 0.358458    | 0.142701    | 0.056     |
| H8C  | 1.076188    | 0.376633    | 0.073230    | 0.056     |
| C9   | 1.00066(17) | 0.23774(13) | 0.06164(10) | 0.0357(5) |
| H9A  | 0.967585    | 0.203135    | 0.050503    | 0.054     |
| H9B  | 1.057213    | 0.215612    | 0.085077    | 0.054     |
| H9C  | 1.022934    | 0.265892    | 0.025959    | 0.054     |
| C10  | 0.79065(18) | 0.22088(13) | 0.08032(11) | 0.0392(6) |
| H10A | 0.749337    | 0.242980    | 0.047315    | 0.059     |
| H10B | 0.751620    | 0.195951    | 0.110776    | 0.059     |
| H10C | 0.845368    | 0.189245    | 0.066225    | 0.059     |
| C11  | 0.65801(17) | 0.31147(16) | 0.14435(13) | 0.0486(7) |
| H11A | 0.628227    | 0.322374    | 0.105773    | 0.073     |
| H11B | 0.623992    | 0.342539    | 0.170178    | 0.073     |
| H11C | 0.652471    | 0.264674    | 0.162035    | 0.073     |
| C12  | 0.72902(19) | 0.42240(13) | 0.18721(13) | 0.0448(6) |
| H12A | 0.716326    | 0.465292    | 0.159734    | 0.067     |
| H12B | 0.757620    | 0.429945    | 0.222743    | 0.067     |
| H12C | 0.667335    | 0.405178    | 0.198066    | 0.067     |
| C1_4 | 0.71978(14) | 0.28425(10) | 0.34149(9)  | 0.0239(4) |
| C2_4 | 0.78990(14) | 0.24023(10) | 0.37439(9)  | 0.0232(4) |
| C3_4 | 0.79201(15) | 0.23651(10) | 0.43406(9)  | 0.0263(4) |
| H3_4 | 0.840605    | 0.205725    | 0.456562    | 0.032     |
| C4_4 | 0.71993(15) | 0.27975(11) | 0.46038(10) | 0.0296(5) |
| H4_4 | 0.719001    | 0.278745    | 0.501804    | 0.036     |
| C5_4 | 0.64966(15) | 0.32416(11) | 0.42722(10) | 0.0311(5) |
| H5_4 | 0.601344    | 0.353511    | 0.446120    | 0.037     |
| C6_4 | 0.64846(15) | 0.32661(11) | 0.36672(10) | 0.0279(4) |
| H6_4 | 0.599714    | 0.356696    | 0.343798    | 0.033     |
| F1_4 | 0.72670(9)  | 0.28440(7)  | 0.28133(5)  | 0.0319(3) |
| F2_4 | 0.86141(9)  | 0.20177(6)  | 0.34418(5)  | 0.0302(3) |
| C1_3 | 0.94134(15) | 0.34191(10) | 0.34142(9)  | 0.0262(4) |
| C2_3 | 1.02163(15) | 0.29240(11) | 0.35039(9)  | 0.0283(5) |
| C3_3 | 1.07361(16) | 0.28159(11) | 0.40047(10) | 0.0311(5) |
| H3_3 | 1.129665    | 0.247167    | 0.406362    | 0.037     |
| C4_3 | 1.04101(16) | 0.32300(11) | 0.44225(10) | 0.0303(5) |
| H4_3 | 1.074854    | 0.316755    | 0.477767    | 0.036     |
| C5_3 | 0.95976(16) | 0.37331(11) | 0.43281(10) | 0.0301(5) |
| H5_3 | 0.939067    | 0.401417    | 0.461836    | 0.036     |
| C6_3 | 0.90810(16) | 0.38343(10) | 0.38191(10) | 0.0274(4) |
| H6_3 | 0.852019    | 0.417721    | 0.375384    | 0.033     |
| F1_3 | 0.89262(10) | 0.34734(7)  | 0.28987(6)  | 0.0362(3) |
| F2_3 | 1.04703(10) | 0.25397(7)  | 0.30614(6)  | 0.0417(3) |
| C1_2 | 1.13280(14) | 0.13640(10) | 0.22571(9)  | 0.0237(4) |
| C2_2 | 1.08576(14) | 0.09796(10) | 0.26994(9)  | 0.0237(4) |
| C3_2 | 1.12673(16) | 0.03350(11) | 0.29360(10) | 0.0295(5) |
| H3_2 | 1.093777    | 0.007129    | 0.324238    | 0.035     |
| C4_2 | 1.21879(17) | 0.00811(11) | 0.27093(11) | 0.0330(5) |
| H4_2 | 1.249532    | -0.036530   | 0.286291    | 0.040     |
| C5_2 | 1.26595(16) | 0.04683(12) | 0.22653(10) | 0.0329(5) |
| H5_2 | 1.328791    | 0.028540    | 0.211730    | 0.039     |

|       |             |              |             |             |
|-------|-------------|--------------|-------------|-------------|
| C6_2  | 1.22282(15) | 0.11228(12)  | 0.20310(10) | 0.0300(5)   |
| H6_2  | 1.254975    | 0.139178     | 0.172447    | 0.036       |
| F1_2  | 1.08523(8)  | 0.20094(6)   | 0.20417(5)  | 0.0286(3)   |
| F2_2  | 0.99459(8)  | 0.12680(6)   | 0.28931(5)  | 0.0293(3)   |
| C1_1  | 0.89589(15) | 0.07936(11)  | 0.19527(9)  | 0.0262(4)   |
| C2_1  | 0.81486(15) | 0.09002(11)  | 0.23179(10) | 0.0297(5)   |
| C3_1  | 0.76679(17) | 0.03807(12)  | 0.25744(10) | 0.0351(5)   |
| H3_1  | 0.710621    | 0.045688     | 0.283003    | 0.042       |
| C4_1  | 0.80362(17) | -0.02613(12) | 0.24451(10) | 0.0357(5)   |
| H4_1  | 0.772326    | -0.063378    | 0.261659    | 0.043       |
| C5_1  | 0.88483(17) | -0.03664(12) | 0.20722(10) | 0.0326(5)   |
| H5_1  | 0.908405    | -0.080942    | 0.198701    | 0.039       |
| C6_1  | 0.93282(16) | 0.01673(11)  | 0.18183(10) | 0.0293(5)   |
| H6_1  | 0.989030    | 0.009819     | 0.156171    | 0.035       |
| F1_1  | 0.93993(9)  | 0.13507(6)   | 0.17322(6)  | 0.0313(3)   |
| F2_1  | 0.78455(9)  | 0.15540(7)   | 0.24266(6)  | 0.0396(3)   |
| Sr1   | 0.90281(2)  | 0.24471(2)   | 0.23005(2)  | 0.02543(5)  |
| Al1   | 0.40601(4)  | 0.07156(3)   | 0.49322(3)  | 0.01613(11) |
| Al2   | 0.11078(4)  | 0.67525(3)   | 0.27561(2)  | 0.01517(11) |
| Al4   | 0.41576(4)  | 0.07581(3)   | 0.98097(2)  | 0.01731(11) |
| Al3   | 0.30455(4)  | 0.53643(3)   | 0.29884(3)  | 0.01636(11) |
| F3    | 0.500000    | 0.000000     | 1.000000    | 0.0204(3)   |
| F2    | 0.20843(7)  | 0.60625(5)   | 0.28660(5)  | 0.0196(2)   |
| F1    | 0.500000    | 0.000000     | 0.500000    | 0.0174(3)   |
| O1_22 | 0.4016(14)  | 0.5713(16)   | 0.2667(12)  | 0.028(5)    |
| C1_22 | 0.4895(11)  | 0.5906(7)    | 0.2699(6)   | 0.027(3)    |
| C2_22 | 0.5586(10)  | 0.5361(7)    | 0.3092(6)   | 0.033(3)    |
| F1_22 | 0.5346(6)   | 0.5352(6)    | 0.3666(4)   | 0.046(2)    |
| F2_22 | 0.6532(6)   | 0.5425(6)    | 0.3005(5)   | 0.044(2)    |
| F3_22 | 0.5534(7)   | 0.4742(4)    | 0.2987(5)   | 0.046(2)    |
| C3_22 | 0.5377(11)  | 0.6053(8)    | 0.2072(6)   | 0.035(4)    |
| F4_22 | 0.4721(7)   | 0.6398(5)    | 0.1697(5)   | 0.043(2)    |
| F5_22 | 0.5740(10)  | 0.5472(7)    | 0.1889(8)   | 0.057(3)    |
| F6_22 | 0.6094(9)   | 0.6414(6)    | 0.2058(7)   | 0.059(3)    |
| C4_22 | 0.4693(12)  | 0.6565(8)    | 0.2982(7)   | 0.045(4)    |
| F7_22 | 0.4304(9)   | 0.7084(4)    | 0.2586(5)   | 0.059(3)    |
| F8_22 | 0.5530(13)  | 0.6667(9)    | 0.3173(9)   | 0.060(4)    |
| F9_22 | 0.4023(8)   | 0.6476(5)    | 0.3421(5)   | 0.052(2)    |
| O1_23 | 0.2987(6)   | 0.0518(6)    | 0.4783(5)   | 0.020(2)    |
| C1_23 | 0.2161(9)   | 0.0256(7)    | 0.4980(6)   | 0.023(3)    |
| C2_23 | 0.1231(10)  | 0.0780(8)    | 0.4808(7)   | 0.033(4)    |
| F1_23 | 0.1339(10)  | 0.1386(6)    | 0.4911(7)   | 0.055(3)    |
| F2_23 | 0.0443(7)   | 0.0595(6)    | 0.5107(6)   | 0.048(3)    |
| F3_23 | 0.1102(9)   | 0.0872(7)    | 0.4231(5)   | 0.063(4)    |
| C3_23 | 0.2186(15)  | -0.0381(9)   | 0.4691(9)   | 0.031(4)    |
| F4_23 | 0.2797(17)  | -0.0900(12)  | 0.4968(13)  | 0.061(5)    |
| F5_23 | 0.250(2)    | -0.0263(13)  | 0.4133(9)   | 0.046(4)    |
| F6_23 | 0.1313(14)  | -0.0555(11)  | 0.4691(10)  | 0.038(4)    |
| C4_23 | 0.2153(11)  | 0.0054(8)    | 0.5656(6)   | 0.047(4)    |
| F7_23 | 0.3046(9)   | -0.0199(8)   | 0.5842(6)   | 0.080(5)    |
| F8_23 | 0.1597(11)  | -0.0420(7)   | 0.5859(5)   | 0.050(3)    |
| F9_23 | 0.1804(14)  | 0.0608(8)    | 0.5907(7)   | 0.064(4)    |
| O1_5  | 0.4468(10)  | 0.1114(9)    | 0.4215(5)   | 0.023(3)    |
| C1_5  | 0.4460(10)  | 0.1270(7)    | 0.3607(6)   | 0.025(3)    |
| C2_5  | 0.4699(10)  | 0.0624(8)    | 0.3309(6)   | 0.032(3)    |

|      |            |            |            |          |
|------|------------|------------|------------|----------|
| F1_5 | 0.4175(17) | 0.0156(12) | 0.3566(11) | 0.042(4) |
| F2_5 | 0.4480(10) | 0.0720(6)  | 0.2749(5)  | 0.046(3) |
| F3_5 | 0.5651(7)  | 0.0380(5)  | 0.3349(6)  | 0.045(3) |
| C3_5 | 0.5210(9)  | 0.1746(8)  | 0.3344(6)  | 0.037(3) |
| F4_5 | 0.488(2)   | 0.2370(9)  | 0.3453(11) | 0.041(4) |
| F5_5 | 0.6056(6)  | 0.1539(5)  | 0.3601(6)  | 0.047(3) |
| F6_5 | 0.5378(9)  | 0.1798(6)  | 0.2762(5)  | 0.053(3) |
| C4_5 | 0.3424(12) | 0.1652(9)  | 0.3417(7)  | 0.023(3) |
| F7_5 | 0.3073(15) | 0.2092(10) | 0.3771(6)  | 0.033(3) |
| F8_5 | 0.3396(10) | 0.1979(8)  | 0.2862(5)  | 0.036(3) |
| F9_5 | 0.2817(18) | 0.1203(13) | 0.3457(10) | 0.037(4) |

Table S 7 Fractional Atomic Coordinates ( $\times 10^4$ ) and Equivalent Isotropic Displacement Parameters ( $\text{\AA}^2 \times 10^3$ ) for [CaHMB(oDFB)<sub>a</sub>][al-f-al]<sub>2</sub>.  $U_{eq}$  is defined as 1/3 of the trace of the orthogonalised  $U_{ij}$  tensor.

| Atom | x           | y           | z           | $U_{eq}$    |
|------|-------------|-------------|-------------|-------------|
| Ca1  | -0.11359(4) | 0.23605(3)  | 0.22817(3)  | 0.02805(12) |
| Al1  | 0.89483(5)  | 0.32319(3)  | 0.72588(3)  | 0.01628(14) |
| Al2  | 0.41515(5)  | 0.07338(3)  | 0.97836(3)  | 0.01689(14) |
| Al3  | 0.41122(5)  | 0.07276(3)  | 0.48497(3)  | 0.01771(14) |
| Al4  | 0.70391(5)  | 0.46135(3)  | 0.70564(3)  | 0.01900(15) |
| F1   | 0.500000    | 0.000000    | 0.500000    | 0.0199(4)   |
| F2   | 0.500000    | 0.000000    | 1.000000    | 0.0213(4)   |
| F3   | 0.80126(9)  | 0.39359(7)  | 0.71669(6)  | 0.0222(3)   |
| O1_3 | 0.73739(17) | 0.51584(10) | 0.74589(12) | 0.0471(6)   |
| C1_3 | 0.71855(19) | 0.57157(13) | 0.77178(13) | 0.0304(6)   |
| C2_3 | 0.6124(2)   | 0.60786(15) | 0.76567(16) | 0.0407(7)   |
| F1_3 | 0.55197(14) | 0.57392(11) | 0.80266(12) | 0.0636(6)   |
| F2_3 | 0.59999(14) | 0.67104(9)  | 0.77660(10) | 0.0538(5)   |
| F3_3 | 0.58577(14) | 0.61007(11) | 0.71095(10) | 0.0581(6)   |
| C3_3 | 0.7883(2)   | 0.62185(16) | 0.74083(16) | 0.0432(7)   |
| F4_3 | 0.87786(14) | 0.58957(11) | 0.73258(12) | 0.0682(7)   |
| F5_3 | 0.75822(16) | 0.65247(11) | 0.68856(10) | 0.0612(6)   |
| F6_3 | 0.79491(16) | 0.66931(10) | 0.77270(11) | 0.0631(6)   |
| C4_3 | 0.7402(3)   | 0.55186(16) | 0.83816(15) | 0.0464(8)   |
| F7_3 | 0.83523(16) | 0.53438(10) | 0.84445(11) | 0.0608(6)   |
| F8_3 | 0.7075(2)   | 0.60222(13) | 0.86844(10) | 0.0794(8)   |
| F9_3 | 0.69811(19) | 0.49917(12) | 0.86286(11) | 0.0714(7)   |
| O1_4 | 0.99706(11) | 0.35220(9)  | 0.69303(8)  | 0.0223(3)   |
| C1_4 | 1.08615(16) | 0.36871(12) | 0.69746(11) | 0.0211(5)   |
| C2_4 | 1.15789(18) | 0.30547(13) | 0.72299(12) | 0.0274(5)   |
| F1_4 | 1.18358(13) | 0.26431(8)  | 0.68261(8)  | 0.0401(4)   |
| F2_4 | 1.23938(11) | 0.32118(9)  | 0.73854(9)  | 0.0424(4)   |
| F3_4 | 1.11689(12) | 0.27036(9)  | 0.76982(8)  | 0.0390(4)   |
| C3_4 | 1.0786(2)   | 0.42351(14) | 0.73762(13) | 0.0331(6)   |
| F4_4 | 1.00001(14) | 0.46901(10) | 0.72793(10) | 0.0530(5)   |
| F5_4 | 1.07209(15) | 0.39587(11) | 0.79512(8)  | 0.0498(5)   |
| F6_4 | 1.15548(13) | 0.45524(10) | 0.73036(10) | 0.0492(5)   |
| C4_4 | 1.12551(18) | 0.39705(13) | 0.63390(12) | 0.0277(5)   |
| F7_4 | 1.08059(13) | 0.46051(9)  | 0.61711(8)  | 0.0439(4)   |
| F8_4 | 1.22049(12) | 0.39946(9)  | 0.63074(8)  | 0.0414(4)   |
| F9_4 | 1.10846(13) | 0.36083(9)  | 0.59470(7)  | 0.0380(4)   |

|      |             |             |             |            |
|------|-------------|-------------|-------------|------------|
| O1_5 | 0.8999(9)   | 0.3005(7)   | 0.7998(3)   | 0.037(2)   |
| C1_5 | 0.8664(5)   | 0.2742(3)   | 0.8549(3)   | 0.0302(15) |
| C2_5 | 0.7822(4)   | 0.2340(3)   | 0.8524(2)   | 0.0445(12) |
| F1_5 | 0.8163(4)   | 0.1737(2)   | 0.83971(19) | 0.0648(12) |
| F2_5 | 0.7314(5)   | 0.2251(3)   | 0.9044(2)   | 0.0664(14) |
| F3_5 | 0.7218(7)   | 0.2702(4)   | 0.8102(4)   | 0.0676(19) |
| C3_5 | 0.8294(4)   | 0.3341(2)   | 0.8885(3)   | 0.0515(14) |
| F4_5 | 0.8889(8)   | 0.3803(3)   | 0.8791(4)   | 0.0639(18) |
| F5_5 | 0.7411(4)   | 0.3642(3)   | 0.8713(4)   | 0.0826(19) |
| F6_5 | 0.8206(6)   | 0.3146(5)   | 0.9467(3)   | 0.0745(19) |
| C4_5 | 0.9533(4)   | 0.2277(3)   | 0.8860(2)   | 0.0383(11) |
| F7_5 | 1.0156(2)   | 0.2641(2)   | 0.90079(13) | 0.0516(9)  |
| F8_5 | 0.9269(7)   | 0.1903(7)   | 0.9367(3)   | 0.0527(18) |
| F9_5 | 1.0009(5)   | 0.1864(5)   | 0.8509(4)   | 0.0578(18) |
| O1_6 | 0.6050(4)   | 0.4265(4)   | 0.7330(4)   | 0.061(2)   |
| C1_6 | 0.5161(5)   | 0.4088(3)   | 0.7321(3)   | 0.0347(15) |
| C2_6 | 0.4673(5)   | 0.3978(4)   | 0.7955(3)   | 0.0472(18) |
| F1_6 | 0.4335(3)   | 0.45585(18) | 0.8153(2)   | 0.0633(11) |
| F2_6 | 0.3921(4)   | 0.3642(3)   | 0.7984(4)   | 0.0676(16) |
| F3_6 | 0.5285(2)   | 0.3629(2)   | 0.83421(17) | 0.0553(10) |
| C3_6 | 0.5343(6)   | 0.3427(4)   | 0.7065(3)   | 0.0564(18) |
| F4_6 | 0.6025(3)   | 0.34854(17) | 0.6614(2)   | 0.0728(13) |
| F5_6 | 0.5677(3)   | 0.29120(16) | 0.7466(2)   | 0.0720(12) |
| F6_6 | 0.4534(6)   | 0.3306(5)   | 0.6870(3)   | 0.086(2)   |
| C4_6 | 0.4509(5)   | 0.4655(3)   | 0.6924(3)   | 0.0430(17) |
| F7_6 | 0.4763(3)   | 0.4638(2)   | 0.63595(17) | 0.0571(10) |
| F8_6 | 0.3570(3)   | 0.4611(3)   | 0.7023(3)   | 0.0594(13) |
| F9_6 | 0.4597(3)   | 0.52609(16) | 0.7028(2)   | 0.0599(11) |
| O1_7 | 0.69791(16) | 0.48733(13) | 0.63225(10) | 0.0497(6)  |
| C1_7 | 0.7312(2)   | 0.50726(13) | 0.57591(12) | 0.0306(6)  |
| C2_7 | 0.6862(3)   | 0.58187(15) | 0.55518(16) | 0.0463(8)  |
| F1_7 | 0.73166(19) | 0.62335(10) | 0.57731(13) | 0.0735(7)  |
| F2_7 | 0.69113(19) | 0.59810(12) | 0.49655(10) | 0.0711(7)  |
| F3_7 | 0.59395(16) | 0.59345(10) | 0.57419(11) | 0.0616(6)  |
| C3_7 | 0.6978(2)   | 0.46251(17) | 0.53614(17) | 0.0474(8)  |
| F4_7 | 0.71255(17) | 0.39844(10) | 0.56110(15) | 0.0801(8)  |
| F5_7 | 0.60327(14) | 0.47914(11) | 0.52751(11) | 0.0589(6)  |
| F6_7 | 0.74578(18) | 0.46760(15) | 0.48279(11) | 0.0756(7)  |
| C4_7 | 0.8443(2)   | 0.49977(15) | 0.57068(14) | 0.0378(6)  |
| F7_7 | 0.88396(13) | 0.43523(9)  | 0.57419(10) | 0.0509(5)  |
| F8_7 | 0.87881(16) | 0.53358(12) | 0.52119(9)  | 0.0592(6)  |
| F9_7 | 0.87412(14) | 0.52211(11) | 0.61618(10) | 0.0541(5)  |
| O1_8 | 0.85320(13) | 0.27049(9)  | 0.68722(9)  | 0.0327(4)  |
| C1_8 | 0.87562(18) | 0.21649(12) | 0.65826(12) | 0.0257(5)  |
| C2_8 | 0.9452(2)   | 0.15880(13) | 0.69366(13) | 0.0326(6)  |
| F1_8 | 0.89755(15) | 0.12611(9)  | 0.73974(8)  | 0.0452(4)  |
| F2_8 | 0.98938(14) | 0.11315(8)  | 0.66086(8)  | 0.0422(4)  |
| F3_8 | 1.01379(13) | 0.18457(9)  | 0.71544(8)  | 0.0421(4)  |
| C3_8 | 0.9254(2)   | 0.23718(13) | 0.59597(13) | 0.0330(6)  |
| F4_8 | 0.88128(14) | 0.29669(9)  | 0.57003(9)  | 0.0491(5)  |
| F5_8 | 1.01816(12) | 0.24264(9)  | 0.60015(8)  | 0.0404(4)  |
| F6_8 | 0.92372(14) | 0.19256(9)  | 0.55975(8)  | 0.0420(4)  |
| C4_8 | 0.7783(2)   | 0.19118(14) | 0.65161(14) | 0.0341(6)  |
| F7_8 | 0.72755(13) | 0.23270(10) | 0.61006(9)  | 0.0463(4)  |
| F8_8 | 0.79533(14) | 0.12935(9)  | 0.63606(9)  | 0.0450(4)  |

|       |             |              |             |            |
|-------|-------------|--------------|-------------|------------|
| F9_8  | 0.72396(13) | 0.18726(10)  | 0.70176(9)  | 0.0447(4)  |
| O1_9  | 0.42638(15) | 0.12567(9)   | 1.02716(8)  | 0.0313(4)  |
| C1_9  | 0.43237(18) | 0.18873(12)  | 1.03680(11) | 0.0254(5)  |
| C2_9  | 0.46058(19) | 0.18289(13)  | 1.10179(12) | 0.0290(5)  |
| F1_9  | 0.55388(12) | 0.15721(9)   | 1.10736(8)  | 0.0403(4)  |
| F2_9  | 0.44528(14) | 0.24258(9)   | 1.12058(8)  | 0.0447(4)  |
| F3_9  | 0.40922(12) | 0.14217(8)   | 1.13857(7)  | 0.0335(4)  |
| C3_9  | 0.3335(2)   | 0.23583(15)  | 1.02819(14) | 0.0381(7)  |
| F4_9  | 0.29401(15) | 0.22576(11)  | 0.98032(9)  | 0.0523(5)  |
| F5_9  | 0.27018(13) | 0.22326(11)  | 1.07463(9)  | 0.0514(5)  |
| F6_9  | 0.34170(16) | 0.30102(9)   | 1.02207(10) | 0.0550(5)  |
| C4_9  | 0.5120(2)   | 0.21988(15)  | 0.99378(14) | 0.0380(7)  |
| F7_9  | 0.47866(16) | 0.24298(9)   | 0.94031(8)  | 0.0506(5)  |
| F8_9  | 0.54122(15) | 0.27074(10)  | 1.01309(9)  | 0.0519(5)  |
| F9_9  | 0.58919(15) | 0.17334(11)  | 0.98777(10) | 0.0580(6)  |
| O1_10 | 0.45503(13) | 0.10302(9)   | 0.90761(7)  | 0.0240(4)  |
| C1_10 | 0.43917(17) | 0.11048(12)  | 0.84910(10) | 0.0223(5)  |
| C2_10 | 0.4222(2)   | 0.04235(13)  | 0.83274(12) | 0.0295(6)  |
| F1_10 | 0.33199(13) | 0.03033(9)   | 0.85122(7)  | 0.0388(4)  |
| F2_10 | 0.43244(14) | 0.04109(9)   | 0.77473(7)  | 0.0391(4)  |
| F3_10 | 0.48388(14) | -0.00852(8)  | 0.85946(9)  | 0.0454(4)  |
| C3_10 | 0.5314(2)   | 0.13283(14)  | 0.81226(11) | 0.0308(6)  |
| F4_10 | 0.56534(13) | 0.17767(9)   | 0.83647(7)  | 0.0398(4)  |
| F5_10 | 0.60282(12) | 0.08006(10)  | 0.81056(8)  | 0.0427(4)  |
| F6_10 | 0.51271(13) | 0.15878(9)   | 0.75634(7)  | 0.0375(4)  |
| C4_10 | 0.3495(2)   | 0.16567(13)  | 0.83391(12) | 0.0296(6)  |
| F7_10 | 0.37176(14) | 0.22685(8)   | 0.83318(8)  | 0.0421(4)  |
| F8_10 | 0.31651(12) | 0.16392(9)   | 0.78153(7)  | 0.0372(4)  |
| F9_10 | 0.27698(12) | 0.15760(9)   | 0.87484(8)  | 0.0410(4)  |
| O1_11 | 0.3067(2)   | 0.0445(3)    | 0.9815(2)   | 0.0236(9)  |
| C1_11 | 0.2288(2)   | 0.02297(16)  | 1.01416(14) | 0.0211(6)  |
| C2_11 | 0.1498(2)   | 0.08450(16)  | 1.02440(14) | 0.0321(7)  |
| F1_11 | 0.17616(17) | 0.11592(12)  | 1.06594(11) | 0.0423(6)  |
| F2_11 | 0.06292(16) | 0.06743(14)  | 1.04247(12) | 0.0482(7)  |
| F3_11 | 0.1406(4)   | 0.12922(16)  | 0.9744(2)   | 0.0471(10) |
| C3_11 | 0.1867(3)   | -0.02402(18) | 0.97997(14) | 0.0377(8)  |
| F4_11 | 0.2545(2)   | -0.06563(15) | 0.95704(13) | 0.0519(7)  |
| F5_11 | 0.13663(18) | 0.01336(15)  | 0.93505(10) | 0.0523(7)  |
| F6_11 | 0.1237(2)   | -0.05862(15) | 1.01496(13) | 0.0549(8)  |
| C4_11 | 0.2596(2)   | -0.01659(14) | 1.07525(13) | 0.0246(6)  |
| F7_11 | 0.30674(18) | -0.07782(11) | 1.07058(10) | 0.0399(5)  |
| F8_11 | 0.1860(2)   | -0.02275(16) | 1.11596(14) | 0.0358(7)  |
| F9_11 | 0.3216(2)   | 0.0166(2)    | 1.0966(2)   | 0.0338(7)  |
| O1_1  | 0.4284(3)   | 0.11352(18)  | 0.54112(16) | 0.0241(8)  |
| C1_1  | 0.4142(2)   | 0.17437(15)  | 0.56071(13) | 0.0211(6)  |
| C2_1  | 0.3055(2)   | 0.20727(15)  | 0.55830(14) | 0.0304(6)  |
| F1_1  | 0.2511(2)   | 0.17625(19)  | 0.6011(2)   | 0.0444(8)  |
| F2_1  | 0.29248(16) | 0.27248(9)   | 0.56319(9)  | 0.0385(5)  |
| F3_1  | 0.27291(16) | 0.20198(11)  | 0.50669(10) | 0.0447(5)  |
| C3_1  | 0.4787(2)   | 0.22283(16)  | 0.52184(15) | 0.0342(7)  |
| F4_1  | 0.56613(16) | 0.18899(11)  | 0.50984(14) | 0.0561(7)  |
| F5_1  | 0.43863(18) | 0.24912(9)   | 0.47087(9)  | 0.0462(5)  |
| F6_1  | 0.49072(16) | 0.27348(10)  | 0.54892(11) | 0.0481(6)  |
| C4_1  | 0.4432(2)   | 0.16068(15)  | 0.62555(14) | 0.0328(7)  |
| F7_1  | 0.54035(18) | 0.14698(13)  | 0.62723(12) | 0.0515(6)  |

|       |              |             |             |            |
|-------|--------------|-------------|-------------|------------|
| F8_1  | 0.40993(18)  | 0.21359(9)  | 0.65338(8)  | 0.0437(6)  |
| F9_1  | 0.40611(19)  | 0.10788(10) | 0.65627(8)  | 0.0447(6)  |
| O1_2  | 0.44944(18)  | 0.11417(12) | 0.41629(10) | 0.0253(5)  |
| C1_2  | 0.4373(2)    | 0.12879(16) | 0.35731(14) | 0.0225(7)  |
| C2_2  | 0.3304(3)    | 0.16323(17) | 0.34480(15) | 0.0277(7)  |
| F1_2  | 0.27049(15)  | 0.11757(12) | 0.35284(10) | 0.0322(5)  |
| F2_2  | 0.32284(17)  | 0.19624(10) | 0.28961(9)  | 0.0376(5)  |
| F3_2  | 0.2991(3)    | 0.20724(17) | 0.38193(13) | 0.0407(8)  |
| C3_2  | 0.5083(3)    | 0.17847(17) | 0.32850(16) | 0.0357(7)  |
| F4_2  | 0.59656(15)  | 0.15873(12) | 0.34862(11) | 0.0459(6)  |
| F5_2  | 0.47633(18)  | 0.24039(10) | 0.34110(11) | 0.0454(6)  |
| F6_2  | 0.51937(17)  | 0.18308(12) | 0.26925(9)  | 0.0499(6)  |
| C4_2  | 0.4602(2)    | 0.06349(19) | 0.32842(16) | 0.0303(7)  |
| F7_2  | 0.55590(15)  | 0.04131(12) | 0.32615(11) | 0.0409(5)  |
| F8_2  | 0.43176(17)  | 0.07249(11) | 0.27367(9)  | 0.0425(5)  |
| F9_2  | 0.4185(2)    | 0.01412(15) | 0.36260(12) | 0.0368(6)  |
| O1_12 | 0.3043(6)    | 0.0457(7)   | 0.4818(6)   | 0.0208(18) |
| C1_12 | 0.2298(5)    | 0.0128(4)   | 0.5059(3)   | 0.0210(14) |
| C2_12 | 0.2104(5)    | -0.0340(4)  | 0.4631(3)   | 0.0263(14) |
| F1_12 | 0.1628(3)    | 0.0010(2)   | 0.41805(16) | 0.0504(10) |
| F2_12 | 0.1569(7)    | -0.0806(5)  | 0.4906(5)   | 0.0412(13) |
| F3_12 | 0.2943(3)    | -0.0659(2)  | 0.4423(2)   | 0.0481(10) |
| C3_12 | 0.2583(6)    | -0.0319(4)  | 0.5661(3)   | 0.0589(19) |
| F4_12 | 0.2986(5)    | 0.0044(4)   | 0.5982(2)   | 0.082(2)   |
| F5_12 | 0.3198(3)    | -0.0866(2)  | 0.5568(2)   | 0.0841(16) |
| F6_12 | 0.1745(8)    | -0.0462(6)  | 0.5982(7)   | 0.081(2)   |
| C4_12 | 0.1374(5)    | 0.0643(3)   | 0.5144(4)   | 0.0516(18) |
| F7_12 | 0.1441(4)    | 0.0927(3)   | 0.5630(3)   | 0.0816(18) |
| F8_12 | 0.0575(7)    | 0.0351(5)   | 0.5244(6)   | 0.068(2)   |
| F9_12 | 0.1268(3)    | 0.1130(2)   | 0.4668(3)   | 0.0640(13) |
| C1_13 | 0.04153(19)  | 0.27189(13) | 0.36563(12) | 0.0290(5)  |
| C2_13 | -0.03355(19) | 0.31733(13) | 0.34046(11) | 0.0274(5)  |
| C3_13 | -0.0801(2)   | 0.37067(13) | 0.36625(13) | 0.0311(6)  |
| H3_13 | -0.131653    | 0.401678    | 0.347864    | 0.037      |
| C4_13 | -0.0494(2)   | 0.37798(14) | 0.42047(13) | 0.0340(6)  |
| H4_13 | -0.080394    | 0.414325    | 0.439967    | 0.041      |
| C5_13 | 0.0263(2)    | 0.33244(14) | 0.44606(12) | 0.0331(6)  |
| H5_13 | 0.046995     | 0.338026    | 0.483029    | 0.040      |
| C6_13 | 0.0721(2)    | 0.27926(14) | 0.41898(13) | 0.0324(6)  |
| H6_13 | 0.124070     | 0.248170    | 0.436874    | 0.039      |
| F1_13 | 0.08230(14)  | 0.22078(10) | 0.33675(9)  | 0.0509(5)  |
| F2_13 | -0.06291(13) | 0.30699(9)  | 0.28675(7)  | 0.0386(4)  |
| C1_14 | -0.21555(19) | 0.23901(13) | 0.38252(13) | 0.0290(5)  |
| C2_14 | -0.27814(19) | 0.28044(13) | 0.34456(12) | 0.0277(5)  |
| C3_14 | -0.3499(2)   | 0.32840(14) | 0.36348(14) | 0.0348(6)  |
| H3_14 | -0.393734    | 0.356505    | 0.336835    | 0.042      |
| C4_14 | -0.3559(2)   | 0.33413(16) | 0.42294(14) | 0.0409(7)  |
| H4_14 | -0.404444    | 0.367031    | 0.437692    | 0.049      |
| C5_14 | -0.2921(2)   | 0.29255(17) | 0.46120(14) | 0.0427(7)  |
| H5_14 | -0.297170    | 0.297366    | 0.501932    | 0.051      |
| C6_14 | -0.2211(2)   | 0.24418(15) | 0.44116(14) | 0.0387(7)  |
| H6_14 | -0.177462    | 0.215363    | 0.467480    | 0.046      |
| F1_14 | -0.14605(13) | 0.19483(9)  | 0.35747(10) | 0.0489(5)  |
| F2_14 | -0.26526(13) | 0.27233(9)  | 0.28543(7)  | 0.0405(4)  |
| C1_15 | 0.06483(19)  | 0.10528(14) | 0.27103(12) | 0.0278(5)  |

|       |              |              |             |           |
|-------|--------------|--------------|-------------|-----------|
| C2_15 | 0.11224(18)  | 0.14704(13)  | 0.22907(11) | 0.0257(5) |
| C3_15 | 0.20287(19)  | 0.12642(15)  | 0.20456(12) | 0.0312(6) |
| H3_15 | 0.234920     | 0.155877     | 0.175436    | 0.037     |
| C4_15 | 0.2461(2)    | 0.06078(15)  | 0.22396(14) | 0.0378(7) |
| H4_15 | 0.309262     | 0.044704     | 0.207994    | 0.045     |
| C5_15 | 0.1990(2)    | 0.01850(15)  | 0.26592(15) | 0.0421(7) |
| H5_15 | 0.230048     | -0.026473    | 0.278289    | 0.050     |
| C6_15 | 0.1067(2)    | 0.04035(15)  | 0.29067(14) | 0.0387(7) |
| H6_15 | 0.074223     | 0.011368     | 0.319972    | 0.046     |
| F1_15 | -0.02722(11) | 0.13150(9)   | 0.29054(7)  | 0.0353(4) |
| F2_15 | 0.06230(11)  | 0.21099(8)   | 0.21096(7)  | 0.0320(3) |
| C1_16 | -0.18498(18) | 0.08428(14)  | 0.23336(12) | 0.0292(6) |
| C2_16 | -0.10442(18) | 0.07676(13)  | 0.19498(11) | 0.0245(5) |
| C3_16 | -0.06398(19) | 0.01529(14)  | 0.17989(12) | 0.0292(6) |
| H3_16 | -0.008329    | 0.010608     | 0.152870    | 0.035     |
| C4_16 | -0.1081(2)   | -0.03994(14) | 0.20588(13) | 0.0345(6) |
| H4_16 | -0.082215    | -0.083411    | 0.196373    | 0.041     |
| C5_16 | -0.1887(2)   | -0.03284(15) | 0.24527(13) | 0.0366(6) |
| H5_16 | -0.217110    | -0.071494    | 0.262685    | 0.044     |
| C6_16 | -0.2288(2)   | 0.02984(16)  | 0.25974(13) | 0.0370(6) |
| H6_16 | -0.284260    | 0.035071     | 0.286808    | 0.044     |
| F1_16 | -0.21872(12) | 0.14866(9)   | 0.24555(8)  | 0.0398(4) |
| F2_16 | -0.06524(11) | 0.13467(8)   | 0.17291(7)  | 0.0306(3) |
| C1    | -0.24718(19) | 0.30744(15)  | 0.14587(13) | 0.0329(6) |
| C2    | -0.1814(2)   | 0.26651(14)  | 0.11167(12) | 0.0297(6) |
| C3    | -0.0834(2)   | 0.27675(14)  | 0.10137(12) | 0.0282(5) |
| C4    | -0.0514(2)   | 0.32844(14)  | 0.12524(12) | 0.0294(6) |
| C5    | -0.1162(2)   | 0.36944(14)  | 0.15831(13) | 0.0332(6) |
| C6    | -0.2146(2)   | 0.36007(14)  | 0.16851(13) | 0.0342(6) |
| C7    | -0.3526(2)   | 0.29708(19)  | 0.15605(17) | 0.0474(8) |
| H7A   | -0.386869    | 0.316332     | 0.120020    | 0.071     |
| H7B   | -0.383476    | 0.319600     | 0.189074    | 0.071     |
| H7C   | -0.355852    | 0.248592     | 0.165634    | 0.071     |
| C8    | -0.2195(2)   | 0.21486(17)  | 0.08339(15) | 0.0423(7) |
| H8A   | -0.263463    | 0.238203     | 0.052742    | 0.063     |
| H8B   | -0.254912    | 0.186358     | 0.113776    | 0.063     |
| H8C   | -0.164706    | 0.186602     | 0.065325    | 0.063     |
| C9    | -0.0112(2)   | 0.23570(17)  | 0.06331(14) | 0.0396(7) |
| H9A   | 0.007897     | 0.265007     | 0.026998    | 0.059     |
| H9B   | -0.041165    | 0.199411     | 0.052857    | 0.059     |
| H9C   | 0.046584     | 0.216030     | 0.085335    | 0.059     |
| C10   | 0.0533(2)    | 0.34121(17)  | 0.11114(15) | 0.0417(7) |
| H10A  | 0.088420     | 0.308018     | 0.087280    | 0.063     |
| H10B  | 0.085313     | 0.336954     | 0.148226    | 0.063     |
| H10C  | 0.053491     | 0.386888     | 0.088844    | 0.063     |
| C11   | -0.0821(3)   | 0.42745(17)  | 0.18062(17) | 0.0485(8) |
| H11A  | -0.014279    | 0.413930     | 0.191251    | 0.073     |
| H11B  | -0.123324    | 0.438611     | 0.215633    | 0.073     |
| H11C  | -0.086631    | 0.467120     | 0.149327    | 0.073     |
| C12   | -0.2840(3)   | 0.40909(18)  | 0.20050(18) | 0.0540(9) |
| H12A  | -0.282146    | 0.455249     | 0.179712    | 0.081     |
| H12B  | -0.264945    | 0.405285     | 0.241207    | 0.081     |
| H12C  | -0.350241    | 0.398654     | 0.201429    | 0.081     |
| O1_18 | 0.2972(13)   | 0.0560(15)   | 0.4809(13)  | 0.023(4)  |
| C1_18 | 0.2215(10)   | 0.0227(7)    | 0.5048(6)   | 0.023(3)  |



|       |            |             |            |            |
|-------|------------|-------------|------------|------------|
| C2_18 | 0.1245(11) | 0.0724(7)   | 0.4940(6)  | 0.050(3)   |
| F1_18 | 0.1032(7)  | 0.0766(6)   | 0.4382(4)  | 0.072(3)   |
| F2_18 | 0.0503(16) | 0.0500(13)  | 0.5279(12) | 0.069(4)   |
| F3_18 | 0.1376(10) | 0.1315(6)   | 0.5054(6)  | 0.074(3)   |
| C3_18 | 0.2344(10) | -0.0025(7)  | 0.5713(6)  | 0.047(3)   |
| F4_18 | 0.3289(8)  | -0.0221(8)  | 0.5807(6)  | 0.074(4)   |
| F5_18 | 0.2095(12) | 0.0481(7)   | 0.6007(6)  | 0.084(3)   |
| F6_18 | 0.1943(17) | -0.0571(11) | 0.5962(14) | 0.073(4)   |
| C4_18 | 0.2224(11) | -0.0350(8)  | 0.4695(6)  | 0.035(3)   |
| F7_18 | 0.2990(10) | -0.0825(6)  | 0.4798(6)  | 0.060(3)   |
| F8_18 | 0.1414(11) | -0.0616(8)  | 0.4784(9)  | 0.063(3)   |
| F9_18 | 0.2280(11) | -0.0134(6)  | 0.4118(4)  | 0.051(3)   |
| O1_19 | 0.9044(16) | 0.2935(13)  | 0.7995(5)  | 0.037(4)   |
| C1_19 | 0.8712(7)  | 0.2793(5)   | 0.8574(5)  | 0.033(3)   |
| C2_19 | 0.9003(6)  | 0.3282(5)   | 0.8956(4)  | 0.043(2)   |
| F1_19 | 0.9951(4)  | 0.3125(4)   | 0.9044(3)  | 0.0517(16) |
| F2_19 | 0.8527(9)  | 0.3239(8)   | 0.9488(5)  | 0.059(3)   |
| F3_19 | 0.8824(14) | 0.3899(7)   | 0.8643(9)  | 0.066(3)   |
| C3_19 | 0.7579(6)  | 0.2847(6)   | 0.8615(4)  | 0.061(2)   |
| F4_19 | 0.7351(13) | 0.2505(8)   | 0.8199(7)  | 0.074(3)   |
| F5_19 | 0.7195(8)  | 0.3494(6)   | 0.8543(6)  | 0.074(3)   |
| F6_19 | 0.7249(10) | 0.2535(5)   | 0.9132(4)  | 0.072(3)   |
| C4_19 | 0.9187(8)  | 0.2058(4)   | 0.8802(4)  | 0.050(2)   |
| F7_19 | 0.8772(8)  | 0.1605(4)   | 0.8598(3)  | 0.072(2)   |
| F8_19 | 0.9013(15) | 0.1934(12)  | 0.9391(6)  | 0.058(4)   |
| F9_19 | 1.0129(9)  | 0.1956(8)   | 0.8645(6)  | 0.052(3)   |
| O1_22 | 0.432(3)   | 0.1209(16)  | 0.5338(14) | 0.030(6)   |
| C1_22 | 0.4194(11) | 0.1656(8)   | 0.5723(7)  | 0.028(4)   |
| C2_22 | 0.5201(11) | 0.1657(9)   | 0.5956(8)  | 0.047(4)   |
| F1_22 | 0.5890(12) | 0.1640(12)  | 0.5522(10) | 0.068(6)   |
| F2_22 | 0.5210(14) | 0.2181(11)  | 0.6219(12) | 0.088(8)   |
| F3_22 | 0.5400(18) | 0.1104(11)  | 0.6359(10) | 0.070(5)   |
| C3_22 | 0.3458(14) | 0.1449(10)  | 0.6241(8)  | 0.058(5)   |
| F4_22 | 0.2550(16) | 0.1619(19)  | 0.6076(16) | 0.048(5)   |
| F5_22 | 0.361(2)   | 0.0785(10)  | 0.6396(12) | 0.096(9)   |
| F6_22 | 0.3523(15) | 0.1735(14)  | 0.6706(8)  | 0.077(7)   |
| C4_22 | 0.3798(12) | 0.2365(8)   | 0.5388(7)  | 0.043(4)   |
| F7_22 | 0.3105(14) | 0.2340(12)  | 0.5041(9)  | 0.064(4)   |
| F8_22 | 0.3455(16) | 0.2772(9)   | 0.5783(9)  | 0.053(4)   |
| F9_22 | 0.4522(14) | 0.2621(10)  | 0.5051(10) | 0.055(3)   |
| O1_23 | 0.5999(8)  | 0.4353(7)   | 0.7397(6)  | 0.019(2)   |
| C1_23 | 0.5190(9)  | 0.4112(6)   | 0.7288(5)  | 0.029(3)   |
| C2_23 | 0.4459(10) | 0.4675(7)   | 0.6943(6)  | 0.044(3)   |
| F1_23 | 0.4159(8)  | 0.5152(4)   | 0.7275(5)  | 0.079(3)   |
| F2_23 | 0.3688(8)  | 0.4449(6)   | 0.6798(6)  | 0.061(3)   |
| F3_23 | 0.4882(5)  | 0.4996(5)   | 0.6463(4)  | 0.066(3)   |
| C3_23 | 0.5268(11) | 0.3492(7)   | 0.6981(6)  | 0.052(3)   |
| F4_23 | 0.6027(8)  | 0.3037(5)   | 0.7147(5)  | 0.085(3)   |
| F5_23 | 0.5348(8)  | 0.3627(6)   | 0.6389(3)  | 0.094(3)   |
| F6_23 | 0.4481(13) | 0.3182(10)  | 0.7108(7)  | 0.077(3)   |
| C4_23 | 0.4741(10) | 0.3905(6)   | 0.7934(6)  | 0.042(3)   |
| F7_23 | 0.5189(5)  | 0.3308(4)   | 0.8181(4)  | 0.053(2)   |
| F8_23 | 0.3797(8)  | 0.3905(6)   | 0.7962(8)  | 0.061(3)   |
| F9_23 | 0.4879(9)  | 0.4363(6)   | 0.8253(5)  | 0.081(3)   |
| O1_25 | 0.3061(7)  | 0.0376(7)   | 0.5147(7)  | 0.036(3)   |

|       |            |             |            |          |
|-------|------------|-------------|------------|----------|
| C1_25 | 0.2168(9)  | 0.0193(7)   | 0.5133(6)  | 0.029(3) |
| C2_25 | 0.1748(11) | -0.0063(9)  | 0.5768(6)  | 0.068(3) |
| F1_25 | 0.2274(15) | -0.0625(10) | 0.6011(11) | 0.081(4) |
| F2_25 | 0.0854(9)  | -0.0205(8)  | 0.5772(7)  | 0.085(4) |
| F3_25 | 0.1743(19) | 0.0391(12)  | 0.6113(9)  | 0.099(5) |
| C3_25 | 0.1432(10) | 0.0808(8)   | 0.4876(7)  | 0.055(3) |
| F4_25 | 0.1763(10) | 0.1113(6)   | 0.4362(7)  | 0.070(3) |
| F5_25 | 0.1169(17) | 0.1223(11)  | 0.5271(10) | 0.076(4) |
| F6_25 | 0.0603(9)  | 0.0620(10)  | 0.4780(11) | 0.100(6) |
| C4_25 | 0.2314(14) | -0.0417(9)  | 0.4800(7)  | 0.043(4) |
| F7_25 | 0.2617(13) | -0.0271(10) | 0.4231(7)  | 0.051(3) |
| F8_25 | 0.159(2)   | -0.0770(19) | 0.4883(18) | 0.055(4) |
| F9_25 | 0.3020(18) | -0.0879(10) | 0.5058(9)  | 0.081(5) |
| O1_26 | 0.3035(15) | 0.0524(19)  | 0.9793(15) | 0.024(6) |
| C1_26 | 0.2277(12) | 0.0250(8)   | 1.0086(8)  | 0.036(4) |
| C2_26 | 0.2238(14) | 0.0284(9)   | 1.0762(7)  | 0.044(4) |
| F1_26 | 0.3106(18) | 0.0076(19)  | 1.0975(16) | 0.045(5) |
| F2_26 | 0.1646(18) | -0.0132(14) | 1.1056(12) | 0.048(5) |
| F3_26 | 0.1856(18) | 0.0887(10)  | 1.0873(9)  | 0.067(4) |
| C3_26 | 0.1348(11) | 0.0690(9)   | 0.9827(7)  | 0.042(4) |
| F4_26 | 0.1256(15) | 0.0594(13)  | 0.9278(7)  | 0.066(4) |
| F5_26 | 0.133(3)   | 0.1345(10)  | 0.9813(18) | 0.036(4) |
| F6_26 | 0.0589(11) | 0.0500(12)  | 1.0184(8)  | 0.052(4) |
| C4_26 | 0.2407(14) | -0.0500(8)  | 1.0010(8)  | 0.059(4) |
| F7_26 | 0.2989(16) | -0.0608(12) | 0.9534(9)  | 0.055(4) |
| F8_26 | 0.1617(15) | -0.0785(12) | 1.0057(13) | 0.071(5) |
| F9_26 | 0.2921(17) | -0.0870(10) | 1.0449(9)  | 0.072(4) |
| O1_27 | 0.4062(13) | 0.1081(11)  | 0.4184(6)  | 0.046(5) |
| C1_27 | 0.4430(10) | 0.1289(8)   | 0.3646(7)  | 0.031(4) |
| C2_27 | 0.5237(11) | 0.1727(8)   | 0.3641(8)  | 0.053(4) |
| F1_27 | 0.4847(16) | 0.2334(8)   | 0.3768(11) | 0.077(4) |
| F2_27 | 0.5741(13) | 0.1751(9)   | 0.3119(7)  | 0.059(3) |
| F3_27 | 0.5822(10) | 0.1456(10)  | 0.4066(7)  | 0.070(5) |
| C3_27 | 0.4855(13) | 0.0653(9)   | 0.3358(8)  | 0.046(4) |
| F4_27 | 0.4201(18) | 0.0238(13)  | 0.3430(11) | 0.053(4) |
| F5_27 | 0.5695(10) | 0.0393(8)   | 0.3596(8)  | 0.047(3) |
| F6_27 | 0.4935(14) | 0.0836(10)  | 0.2775(6)  | 0.065(4) |
| C4_27 | 0.3526(12) | 0.1683(10)  | 0.3326(7)  | 0.041(4) |
| F7_27 | 0.2914(14) | 0.1263(11)  | 0.3275(9)  | 0.059(4) |
| F8_27 | 0.3794(15) | 0.1968(10)  | 0.2795(7)  | 0.069(4) |
| F9_27 | 0.307(2)   | 0.2146(13)  | 0.3638(10) | 0.049(4) |

Table S 8 Fractional Atomic Coordinates ( $\times 10^4$ ) and Equivalent Isotropic Displacement Parameters ( $\text{\AA}^2 \times 10^3$ ) for [InHMB][al-f-al].  $U_{eq}$  is defined as 1/3 of the trace of the orthogonalised  $U_{ij}$  tensor.

| Atom   | x          | y           | z           | $U_{eq}$   |
|--------|------------|-------------|-------------|------------|
| C1_18  | -0.6951(3) | 0.21183(16) | 0.25691(13) | 0.0216(7)  |
| C2_18  | -0.7232(3) | 0.15905(15) | 0.24101(13) | 0.0229(7)  |
| C3_18  | -0.8418(3) | 0.16227(15) | 0.22171(13) | 0.0228(7)  |
| C4_18  | -0.9351(3) | 0.21760(15) | 0.21947(13) | 0.0194(6)  |
| C5_18  | -0.9090(3) | 0.26912(15) | 0.23765(13) | 0.0191(6)  |
| C6_18  | -0.7887(3) | 0.26718(15) | 0.25494(13) | 0.0203(6)  |
| C7_18  | -0.5679(4) | 0.2073(2)   | 0.27815(17) | 0.0395(10) |
| H7A_18 | -0.496143  | 0.203255    | 0.246986    | 0.059      |
| H7B_18 | -0.555179  | 0.170989    | 0.307383    | 0.059      |

|         |            |             |             |            |
|---------|------------|-------------|-------------|------------|
| H7C_18  | -0.569760  | 0.244673    | 0.293839    | 0.059      |
| C8_18   | -0.6286(4) | 0.09820(18) | 0.24791(18) | 0.0404(10) |
| H8A_18  | -0.648754  | 0.070106    | 0.225831    | 0.061      |
| H8B_18  | -0.636218  | 0.079640    | 0.287654    | 0.061      |
| H8C_18  | -0.539732  | 0.105449    | 0.234699    | 0.061      |
| C9_18   | -0.8680(5) | 0.10543(18) | 0.20519(18) | 0.0408(10) |
| H9A_18  | -0.958512  | 0.112462    | 0.198476    | 0.061      |
| H9B_18  | -0.852963  | 0.070439    | 0.235486    | 0.061      |
| H9C_18  | -0.809656  | 0.096228    | 0.170810    | 0.061      |
| C10_18  | -1.0639(4) | 0.22247(18) | 0.19972(16) | 0.0318(8)  |
| H10A_18 | -1.080130  | 0.260192    | 0.172294    | 0.048      |
| H10B_18 | -1.133484  | 0.224040    | 0.231900    | 0.048      |
| H10C_18 | -1.061757  | 0.186348    | 0.182136    | 0.048      |
| C11_18  | -1.0139(4) | 0.32661(17) | 0.24027(17) | 0.0318(8)  |
| H11A_18 | -1.031735  | 0.345018    | 0.202198    | 0.048      |
| H11B_18 | -0.984351  | 0.356561    | 0.257164    | 0.048      |
| H11C_18 | -1.093490  | 0.315369    | 0.263157    | 0.048      |
| C12_18  | -0.7627(4) | 0.32349(18) | 0.27350(16) | 0.0329(8)  |
| H12A_18 | -0.668651  | 0.320686    | 0.271115    | 0.049      |
| H12B_18 | -0.804090  | 0.325482    | 0.312387    | 0.049      |
| H12C_18 | -0.798388  | 0.360827    | 0.249033    | 0.049      |
| C1_17   | 0.6743(3)  | 0.79235(15) | 0.23435(14) | 0.0216(6)  |
| C2_17   | 0.7820(3)  | 0.74423(16) | 0.24087(14) | 0.0233(7)  |
| C3_17   | 0.8871(3)  | 0.75331(17) | 0.26431(14) | 0.0260(7)  |
| C4_17   | 0.8801(3)  | 0.80880(17) | 0.28495(14) | 0.0268(7)  |
| C5_17   | 0.7748(3)  | 0.85797(16) | 0.27606(13) | 0.0243(7)  |
| C6_17   | 0.6734(3)  | 0.85001(15) | 0.24933(14) | 0.0235(7)  |
| C7_17   | 0.5613(4)  | 0.78384(18) | 0.20823(16) | 0.0324(8)  |
| H7A_17  | 0.569481   | 0.803295    | 0.168727    | 0.049      |
| H7B_17  | 0.479234   | 0.803155    | 0.228516    | 0.049      |
| H7C_17  | 0.562152   | 0.739585    | 0.210608    | 0.049      |
| C8_17   | 0.7860(4)  | 0.68388(17) | 0.22102(17) | 0.0349(9)  |
| H8A_17  | 0.807588   | 0.689074    | 0.179993    | 0.052      |
| H8B_17  | 0.700740   | 0.671586    | 0.232248    | 0.052      |
| H8C_17  | 0.852131   | 0.651807    | 0.237942    | 0.052      |
| C9_17   | 1.0075(4)  | 0.7036(2)   | 0.2647(2)   | 0.0457(11) |
| H9A_17  | 1.038266   | 0.694148    | 0.226571    | 0.069      |
| H9B_17  | 0.986974   | 0.666235    | 0.289766    | 0.069      |
| H9C_17  | 1.075491   | 0.718137    | 0.278093    | 0.069      |
| C10_17  | 0.9864(4)  | 0.8165(2)   | 0.31508(18) | 0.0436(11) |
| H10A_17 | 1.044294   | 0.841372    | 0.289323    | 0.065      |
| H10B_17 | 1.036277   | 0.775806    | 0.328007    | 0.065      |
| H10C_17 | 0.947475   | 0.837495    | 0.347463    | 0.065      |
| C11_17  | 0.7733(4)  | 0.91943(19) | 0.29330(18) | 0.0401(10) |
| H11A_17 | 0.806879   | 0.947376    | 0.260717    | 0.060      |
| H11B_17 | 0.828118   | 0.913219    | 0.322833    | 0.060      |
| H11C_17 | 0.683958   | 0.937580    | 0.307531    | 0.060      |
| C12_17  | 0.5675(4)  | 0.90334(18) | 0.23274(17) | 0.0362(9)  |
| H12A_17 | 0.564629   | 0.907675    | 0.192378    | 0.054      |
| H12B_17 | 0.585374   | 0.941517    | 0.241233    | 0.054      |
| H12C_17 | 0.483577   | 0.895527    | 0.253812    | 0.054      |
| O1_16   | 0.9914(19) | 0.8754(9)   | 0.0030(9)   | 0.019(3)   |
| C1_16   | 0.9115(10) | 0.8336(5)   | 0.0230(4)   | 0.024(2)   |
| C2_16   | 0.9443(7)  | 0.7970(3)   | 0.0809(3)   | 0.0298(17) |
| F1_16   | 1.0701(10) | 0.7819(8)   | 0.0817(5)   | 0.034(3)   |

|       |              |             |             |           |
|-------|--------------|-------------|-------------|-----------|
| F2_16 | 0.8924(19)   | 0.7462(7)   | 0.0941(6)   | 0.040(3)  |
| F3_16 | 0.8996(9)    | 0.8312(4)   | 0.1206(3)   | 0.049(2)  |
| C3_16 | 0.7668(7)    | 0.8669(4)   | 0.0303(4)   | 0.045(2)  |
| F4_16 | 0.7261(13)   | 0.8827(7)   | -0.0187(5)  | 0.086(4)  |
| F5_16 | 0.761(2)     | 0.9171(6)   | 0.0540(8)   | 0.088(5)  |
| F6_16 | 0.6887(12)   | 0.8323(7)   | 0.0641(6)   | 0.058(4)  |
| C4_16 | 0.9332(9)    | 0.7883(4)   | -0.0201(3)  | 0.043(2)  |
| F7_16 | 0.934(2)     | 0.8186(12)  | -0.0724(5)  | 0.0538(9) |
| F8_16 | 0.8371(8)    | 0.7553(4)   | -0.0102(3)  | 0.054(2)  |
| F9_16 | 1.0470(10)   | 0.7506(5)   | -0.0183(4)  | 0.063(3)  |
| O1_15 | 1.522(2)     | 0.4480(8)   | 0.1109(10)  | 0.026(5)  |
| C1_15 | 1.6161(12)   | 0.3977(6)   | 0.1219(5)   | 0.020(3)  |
| C2_15 | 1.7467(10)   | 0.4197(5)   | 0.1198(4)   | 0.030(2)  |
| F1_15 | 1.764(2)     | 0.4636(9)   | 0.0762(8)   | 0.042(6)  |
| F2_15 | 1.8480(18)   | 0.3734(8)   | 0.1133(11)  | 0.035(4)  |
| F3_15 | 1.7495(11)   | 0.4397(5)   | 0.1668(4)   | 0.048(3)  |
| C3_15 | 1.5771(9)    | 0.3608(5)   | 0.1806(4)   | 0.031(2)  |
| F4_15 | 1.4863(19)   | 0.3286(11)  | 0.1787(9)   | 0.047(4)  |
| F5_15 | 1.526(2)     | 0.3985(9)   | 0.2180(8)   | 0.042(4)  |
| F6_15 | 1.6764(11)   | 0.3210(5)   | 0.1994(6)   | 0.052(4)  |
| C4_15 | 1.6337(9)    | 0.3550(4)   | 0.0763(4)   | 0.029(2)  |
| F7_15 | 1.5155(15)   | 0.3514(11)  | 0.0672(10)  | 0.053(6)  |
| F8_15 | 1.7007(10)   | 0.2992(4)   | 0.0917(5)   | 0.045(2)  |
| F9_15 | 1.6959(10)   | 0.3805(6)   | 0.0285(4)   | 0.038(2)  |
| O1_14 | 0.431(2)     | 0.4423(7)   | 0.4212(12)  | 0.016(3)  |
| C1_14 | 0.4114(11)   | 0.3832(7)   | 0.4399(5)   | 0.020(3)  |
| C2_14 | 0.3048(10)   | 0.3847(4)   | 0.4920(4)   | 0.026(2)  |
| F1_14 | 0.3566(12)   | 0.3892(5)   | 0.5362(4)   | 0.047(3)  |
| F2_14 | 0.2533(17)   | 0.3332(6)   | 0.5045(8)   | 0.034(3)  |
| F3_14 | 0.2095(11)   | 0.4332(6)   | 0.4851(8)   | 0.026(3)  |
| C3_14 | 0.3623(10)   | 0.3608(5)   | 0.3924(4)   | 0.027(2)  |
| F4_14 | 0.4344(19)   | 0.3727(11)  | 0.3434(7)   | 0.032(3)  |
| F5_14 | 0.2411(8)    | 0.3904(4)   | 0.3885(4)   | 0.040(2)  |
| F6_14 | 0.357(3)     | 0.3016(7)   | 0.4037(15)  | 0.046(5)  |
| C4_14 | 0.5352(10)   | 0.3381(4)   | 0.4567(4)   | 0.026(2)  |
| F7_14 | 0.6134(9)    | 0.3204(4)   | 0.4114(4)   | 0.043(2)  |
| F8_14 | 0.511(2)     | 0.2876(7)   | 0.4918(8)   | 0.034(3)  |
| F9_14 | 0.6008(13)   | 0.3656(6)   | 0.4824(7)   | 0.023(2)  |
| O1_13 | -0.2049(2)   | 0.08662(11) | 0.53975(9)  | 0.0212(5) |
| C1_13 | -0.2590(3)   | 0.08561(13) | 0.59433(12) | 0.0176(6) |
| C2_13 | -0.3795(3)   | 0.05418(15) | 0.60400(14) | 0.0255(7) |
| F1_13 | -0.47991(19) | 0.09284(10) | 0.58278(10) | 0.0348(5) |
| F2_13 | -0.4191(2)   | 0.03678(10) | 0.65843(9)  | 0.0362(5) |
| F3_13 | -0.3542(2)   | 0.00463(10) | 0.57917(10) | 0.0351(5) |
| C3_13 | -0.1604(3)   | 0.04898(14) | 0.63386(13) | 0.0227(6) |
| F4_13 | -0.04327(19) | 0.06359(10) | 0.61521(9)  | 0.0305(5) |
| F5_13 | -0.1474(2)   | -0.01182(9) | 0.63481(9)  | 0.0298(5) |
| F6_13 | -0.1953(2)   | 0.06015(10) | 0.68664(8)  | 0.0331(5) |
| C4_13 | -0.3007(3)   | 0.15329(15) | 0.60638(14) | 0.0246(7) |
| F7_13 | -0.1982(2)   | 0.17610(9)  | 0.61115(9)  | 0.0332(5) |
| F8_13 | -0.3847(2)   | 0.15698(10) | 0.65437(9)  | 0.0359(5) |
| F9_13 | -0.3594(2)   | 0.18967(9)  | 0.56543(9)  | 0.0302(5) |
| O1_12 | -0.1214(2)   | 0.08928(10) | 0.42325(9)  | 0.0195(4) |
| C1_12 | -0.2229(3)   | 0.10207(14) | 0.39328(13) | 0.0205(6) |
| C2_12 | -0.3168(3)   | 0.05633(18) | 0.41638(16) | 0.0342(8) |

|       |            |              |             |            |
|-------|------------|--------------|-------------|------------|
| F1_12 | -0.3959(2) | 0.07237(14)  | 0.46220(10) | 0.0526(7)  |
| F2_12 | -0.3932(2) | 0.05407(13)  | 0.37854(11) | 0.0486(6)  |
| F3_12 | -0.2521(3) | -0.00020(11) | 0.43030(12) | 0.0521(7)  |
| C3_12 | -0.1657(3) | 0.09474(15)  | 0.33161(14) | 0.0256(7)  |
| F4_12 | -0.0616(2) | 0.12077(11)  | 0.31546(9)  | 0.0349(5)  |
| F5_12 | -0.1286(2) | 0.03542(10)  | 0.32574(9)  | 0.0354(5)  |
| F6_12 | -0.2509(2) | 0.12072(10)  | 0.29618(9)  | 0.0358(5)  |
| C4_12 | -0.2963(4) | 0.16941(17)  | 0.39526(16) | 0.0342(8)  |
| F7_12 | -0.2295(3) | 0.20963(10)  | 0.36196(11) | 0.0492(7)  |
| F8_12 | -0.4136(2) | 0.17931(12)  | 0.37936(11) | 0.0508(7)  |
| F9_12 | -0.3130(3) | 0.18242(12)  | 0.44710(10) | 0.0491(7)  |
| O1_11 | 0.0485(2)  | 0.11484(11)  | 0.49052(10) | 0.0265(5)  |
| C1_11 | 0.1063(3)  | 0.16509(14)  | 0.47243(13) | 0.0197(6)  |
| C2_11 | 0.1440(4)  | 0.17387(15)  | 0.40784(14) | 0.0270(7)  |
| F1_11 | 0.0400(2)  | 0.19987(10)  | 0.38244(9)  | 0.0364(5)  |
| F2_11 | 0.2328(2)  | 0.20996(11)  | 0.39025(9)  | 0.0394(5)  |
| F3_11 | 0.1921(2)  | 0.12002(10)  | 0.39024(9)  | 0.0404(6)  |
| C3_11 | 0.2313(3)  | 0.15306(15)  | 0.50073(15) | 0.0249(7)  |
| F4_11 | 0.2066(2)  | 0.13180(10)  | 0.55526(9)  | 0.0317(5)  |
| F5_11 | 0.3225(2)  | 0.11074(10)  | 0.47776(10) | 0.0381(5)  |
| F6_11 | 0.2805(2)  | 0.20402(10)  | 0.49596(10) | 0.0369(5)  |
| C4_11 | 0.0148(3)  | 0.22446(16)  | 0.48942(15) | 0.0299(7)  |
| F7_11 | 0.0126(2)  | 0.22707(11)  | 0.54402(9)  | 0.0419(6)  |
| F8_11 | 0.0501(2)  | 0.27567(9)   | 0.45982(10) | 0.0401(5)  |
| F9_11 | -0.1062(2) | 0.22416(12)  | 0.48231(11) | 0.0431(6)  |
| O1_10 | 0.4481(11) | 0.4375(4)    | 0.4213(5)   | 0.029(2)   |
| C1_10 | 0.4093(5)  | 0.3821(3)    | 0.4394(2)   | 0.0169(13) |
| C2_10 | 0.4815(5)  | 0.3456(2)    | 0.4880(2)   | 0.0339(12) |
| F1_10 | 0.4290(6)  | 0.3679(2)    | 0.53595(17) | 0.0557(14) |
| F2_10 | 0.4745(9)  | 0.2852(3)    | 0.4966(4)   | 0.048(2)   |
| F3_10 | 0.6054(7)  | 0.3510(4)    | 0.4774(4)   | 0.081(3)   |
| C3_10 | 0.4427(6)  | 0.3461(2)    | 0.3888(2)   | 0.0328(12) |
| F4_10 | 0.4081(10) | 0.3839(5)    | 0.3431(3)   | 0.050(2)   |
| F5_10 | 0.5703(5)  | 0.32506(19)  | 0.3793(2)   | 0.0614(14) |
| F6_10 | 0.3849(11) | 0.2980(3)    | 0.3979(6)   | 0.041(2)   |
| C4_10 | 0.2620(5)  | 0.3915(2)    | 0.4602(2)   | 0.0357(13) |
| F7_10 | 0.1943(4)  | 0.4056(3)    | 0.4170(2)   | 0.0662(15) |
| F8_10 | 0.2250(8)  | 0.3424(3)    | 0.4930(4)   | 0.049(2)   |
| F9_10 | 0.2291(8)  | 0.4383(3)    | 0.4899(4)   | 0.077(3)   |
| O1_9  | 0.4253(3)  | 0.56788(11)  | 0.40234(13) | 0.0420(7)  |
| C1_9  | 0.3294(3)  | 0.60159(14)  | 0.37401(14) | 0.0226(6)  |
| C2_9  | 0.2020(4)  | 0.61746(18)  | 0.41540(15) | 0.0347(8)  |
| F1_9  | 0.2104(3)  | 0.66006(11)  | 0.44503(10) | 0.0437(6)  |
| F2_9  | 0.1004(2)  | 0.63929(13)  | 0.38811(11) | 0.0491(6)  |
| F3_9  | 0.1805(3)  | 0.56750(13)  | 0.45059(11) | 0.0673(9)  |
| C3_9  | 0.3025(3)  | 0.56669(15)  | 0.32942(14) | 0.0249(7)  |
| F4_9  | 0.4125(2)  | 0.53500(10)  | 0.30604(10) | 0.0378(5)  |
| F5_9  | 0.2257(2)  | 0.52604(10)  | 0.35245(10) | 0.0374(5)  |
| F6_9  | 0.2465(2)  | 0.60463(10)  | 0.28841(9)  | 0.0387(5)  |
| C4_9  | 0.3754(3)  | 0.66209(16)  | 0.34456(17) | 0.0332(8)  |
| F7_9  | 0.4688(3)  | 0.65086(12)  | 0.30179(13) | 0.0615(8)  |
| F8_9  | 0.2813(2)  | 0.70528(10)  | 0.32418(10) | 0.0417(6)  |
| F9_9  | 0.4242(3)  | 0.68722(11)  | 0.37894(12) | 0.0505(7)  |
| O1_8  | 0.6732(2)  | 0.49273(13)  | 0.40687(11) | 0.0347(6)  |
| C1_8  | 0.7789(3)  | 0.48571(15)  | 0.36668(13) | 0.0228(7)  |

|      |            |             |             |            |
|------|------------|-------------|-------------|------------|
| C2_8 | 0.8535(4)  | 0.53960(19) | 0.36264(16) | 0.0362(9)  |
| F1_8 | 0.9165(2)  | 0.53114(14) | 0.40632(11) | 0.0546(7)  |
| F2_8 | 0.9406(2)  | 0.54366(13) | 0.31620(11) | 0.0510(7)  |
| F3_8 | 0.7721(3)  | 0.59322(12) | 0.36255(13) | 0.0593(8)  |
| C3_8 | 0.7395(3)  | 0.48658(16) | 0.30830(14) | 0.0253(7)  |
| F4_8 | 0.6470(2)  | 0.45317(10) | 0.31358(9)  | 0.0328(5)  |
| F5_8 | 0.6908(2)  | 0.54372(11) | 0.28579(10) | 0.0430(6)  |
| F6_8 | 0.8391(2)  | 0.46354(11) | 0.27214(8)  | 0.0335(5)  |
| C4_8 | 0.8679(4)  | 0.42304(19) | 0.38382(16) | 0.0385(9)  |
| F7_8 | 0.8185(3)  | 0.37629(11) | 0.37450(11) | 0.0496(6)  |
| F8_8 | 0.9876(2)  | 0.41972(13) | 0.35469(11) | 0.0513(7)  |
| F9_8 | 0.8807(3)  | 0.41406(14) | 0.43729(10) | 0.0601(8)  |
| O1_7 | 1.2896(2)  | 0.53056(10) | 0.08304(9)  | 0.0207(5)  |
| C1_7 | 1.1769(3)  | 0.51191(15) | 0.10844(14) | 0.0234(7)  |
| C2_7 | 1.1573(4)  | 0.51248(17) | 0.17243(16) | 0.0339(8)  |
| F1_7 | 1.1193(3)  | 0.56966(12) | 0.18410(11) | 0.0536(7)  |
| F2_7 | 1.0671(2)  | 0.47963(12) | 0.20019(10) | 0.0443(6)  |
| F3_7 | 1.2670(2)  | 0.48852(12) | 0.19322(9)  | 0.0402(5)  |
| C3_7 | 1.1782(4)  | 0.44535(19) | 0.09768(18) | 0.0405(9)  |
| F4_7 | 1.2386(3)  | 0.43750(13) | 0.04642(12) | 0.0597(8)  |
| F5_7 | 1.2455(2)  | 0.40301(10) | 0.13336(12) | 0.0465(6)  |
| F6_7 | 1.0617(3)  | 0.43149(14) | 0.10395(13) | 0.0594(8)  |
| C4_7 | 1.0631(4)  | 0.5571(2)   | 0.08278(19) | 0.0473(11) |
| F7_7 | 1.0572(3)  | 0.54584(16) | 0.03122(12) | 0.0656(9)  |
| F8_7 | 0.9483(2)  | 0.55102(15) | 0.11400(13) | 0.0684(9)  |
| F9_7 | 1.0770(2)  | 0.61434(12) | 0.07680(13) | 0.0605(8)  |
| O1_6 | 1.5112(9)  | 0.4452(4)   | 0.1097(5)   | 0.0166(16) |
| C1_6 | 1.6093(6)  | 0.3997(3)   | 0.1254(2)   | 0.0173(13) |
| C2_6 | 1.6248(5)  | 0.4015(2)   | 0.1870(2)   | 0.0290(11) |
| F1_6 | 1.6927(5)  | 0.4443(2)   | 0.18845(19) | 0.0467(11) |
| F2_6 | 1.6863(5)  | 0.3471(2)   | 0.2110(2)   | 0.0461(13) |
| F3_6 | 1.5089(9)  | 0.4141(4)   | 0.2177(3)   | 0.0348(16) |
| C3_6 | 1.5734(5)  | 0.3371(2)   | 0.1220(2)   | 0.0284(11) |
| F4_6 | 1.5227(6)  | 0.3404(4)   | 0.0753(4)   | 0.0351(14) |
| F5_6 | 1.4822(9)  | 0.3226(5)   | 0.1652(4)   | 0.0370(16) |
| F6_6 | 1.6746(4)  | 0.29104(17) | 0.1231(2)   | 0.0451(11) |
| C4_6 | 1.7399(4)  | 0.4060(2)   | 0.0856(2)   | 0.0233(10) |
| F7_6 | 1.7385(5)  | 0.3892(3)   | 0.03699(18) | 0.0341(10) |
| F8_6 | 1.8427(8)  | 0.3710(5)   | 0.1079(5)   | 0.040(2)   |
| F9_6 | 1.7543(10) | 0.4648(3)   | 0.0768(4)   | 0.035(2)   |
| O1_5 | 1.5246(2)  | 0.57635(10) | 0.06599(9)  | 0.0201(5)  |
| C1_5 | 1.5231(3)  | 0.62483(14) | 0.09225(13) | 0.0219(6)  |
| C2_5 | 1.6353(4)  | 0.65790(16) | 0.06108(14) | 0.0295(8)  |
| F1_5 | 1.6063(2)  | 0.69029(10) | 0.01162(9)  | 0.0384(5)  |
| F2_5 | 1.6596(3)  | 0.69710(11) | 0.09104(10) | 0.0471(6)  |
| F3_5 | 1.7438(2)  | 0.61792(11) | 0.04985(10) | 0.0368(5)  |
| C3_5 | 1.5456(4)  | 0.60129(18) | 0.15414(15) | 0.0359(9)  |
| F4_5 | 1.4742(2)  | 0.55732(11) | 0.17657(9)  | 0.0406(6)  |
| F5_5 | 1.6688(3)  | 0.57632(13) | 0.15763(10) | 0.0497(7)  |
| F6_5 | 1.5093(3)  | 0.64614(13) | 0.18556(10) | 0.0597(8)  |
| C4_5 | 1.3908(4)  | 0.67131(17) | 0.08990(19) | 0.0407(9)  |
| F7_5 | 1.2994(2)  | 0.65085(12) | 0.12956(12) | 0.0516(7)  |
| F8_5 | 1.4010(3)  | 0.72680(11) | 0.09818(14) | 0.0650(8)  |
| F9_5 | 1.3528(2)  | 0.67730(11) | 0.04037(12) | 0.0502(6)  |
| O1_4 | 0.9877(17) | 0.8793(8)   | -0.0002(8)  | 0.023(3)   |

|      |             |             |              |             |
|------|-------------|-------------|--------------|-------------|
| C1_4 | 0.9064(8)   | 0.8389(4)   | 0.0227(3)    | 0.0170(18)  |
| C2_4 | 0.8401(6)   | 0.8307(3)   | -0.0261(3)   | 0.0313(15)  |
| F1_4 | 0.7520(9)   | 0.8808(4)   | -0.0399(3)   | 0.049(2)    |
| F2_4 | 0.7762(6)   | 0.7834(3)   | -0.0135(3)   | 0.0457(16)  |
| F3_4 | 0.9267(18)  | 0.8219(10)  | -0.0716(5)   | 0.0538(9)   |
| C3_4 | 0.9822(6)   | 0.7752(3)   | 0.0478(3)    | 0.0307(14)  |
| F4_4 | 1.0670(10)  | 0.7826(6)   | 0.0777(5)    | 0.048(3)    |
| F5_4 | 1.0501(8)   | 0.7445(4)   | 0.0070(3)    | 0.0482(18)  |
| F6_4 | 0.9042(15)  | 0.7393(5)   | 0.0787(5)    | 0.042(3)    |
| C4_4 | 0.8007(6)   | 0.8655(3)   | 0.0687(3)    | 0.0326(15)  |
| F7_4 | 0.8456(7)   | 0.8568(3)   | 0.1168(3)    | 0.0479(17)  |
| F8_4 | 0.6973(12)  | 0.8386(7)   | 0.0776(5)    | 0.056(3)    |
| F9_4 | 0.7609(13)  | 0.9260(4)   | 0.0530(4)    | 0.045(2)    |
| O1_3 | 1.1374(2)   | 0.90952(10) | 0.07397(9)   | 0.0224(5)   |
| C1_3 | 1.1649(3)   | 0.92617(14) | 0.12020(13)  | 0.0204(6)   |
| C2_3 | 1.2905(3)   | 0.95406(17) | 0.10620(16)  | 0.0300(8)   |
| F1_3 | 1.3967(2)   | 0.90941(11) | 0.10287(10)  | 0.0408(6)   |
| F2_3 | 1.3021(2)   | 0.98600(11) | 0.14501(11)  | 0.0419(6)   |
| F3_3 | 1.2941(2)   | 0.99078(11) | 0.05740(10)  | 0.0430(6)   |
| C3_3 | 1.0487(3)   | 0.97511(16) | 0.14240(15)  | 0.0272(7)   |
| F4_3 | 0.9367(2)   | 0.96005(10) | 0.13946(10)  | 0.0377(5)   |
| F5_3 | 1.0522(2)   | 1.03066(9)  | 0.11060(10)  | 0.0357(5)   |
| F6_3 | 1.0495(2)   | 0.98107(10) | 0.19538(9)   | 0.0356(5)   |
| C4_3 | 1.1827(4)   | 0.86820(16) | 0.16537(14)  | 0.0286(7)   |
| F7_3 | 1.0677(2)   | 0.85167(11) | 0.18609(9)   | 0.0395(5)   |
| F8_3 | 1.2345(2)   | 0.87791(11) | 0.20809(9)   | 0.0363(5)   |
| F9_3 | 1.2587(2)   | 0.82069(10) | 0.14373(10)  | 0.0411(6)   |
| O1_2 | 1.2146(2)   | 0.92935(10) | -0.04574(9)  | 0.0180(4)   |
| C1_2 | 1.3211(3)   | 0.89394(13) | -0.07162(13) | 0.0189(6)   |
| C2_2 | 1.2835(3)   | 0.87218(16) | -0.12182(15) | 0.0290(7)   |
| F1_2 | 1.2062(2)   | 0.83035(11) | -0.10356(10) | 0.0382(5)   |
| F2_2 | 1.3869(2)   | 0.84542(10) | -0.15457(9)  | 0.0333(5)   |
| F3_2 | 1.2196(2)   | 0.91849(11) | -0.15400(10) | 0.0451(6)   |
| C3_2 | 1.4289(3)   | 0.93298(15) | -0.09216(15) | 0.0283(7)   |
| F4_2 | 1.4443(2)   | 0.96295(11) | -0.05343(11) | 0.0447(6)   |
| F5_2 | 1.4016(2)   | 0.97431(11) | -0.13749(11) | 0.0459(6)   |
| F6_2 | 1.54373(19) | 0.89784(10) | -0.10790(10) | 0.0365(5)   |
| C4_2 | 1.3727(3)   | 0.83591(15) | -0.03010(14) | 0.0252(7)   |
| F7_2 | 1.4381(2)   | 0.85086(11) | 0.00557(10)  | 0.0405(5)   |
| F8_2 | 1.4518(2)   | 0.79162(10) | -0.05537(9)  | 0.0371(5)   |
| F9_2 | 1.2738(2)   | 0.81241(10) | 0.00111(10)  | 0.0373(5)   |
| ln2  | -0.72141(2) | 0.25018(2)  | 0.13883(2)   | 0.02404(6)  |
| ln1  | 0.67612(3)  | 0.75890(2)  | 0.35535(2)   | 0.02949(7)  |
| Al1  | 1.09060(8)  | 0.92373(4)  | 0.00922(4)   | 0.01320(17) |
| Al4  | -0.07524(8) | 0.07869(4)  | 0.48822(4)   | 0.01300(17) |
| Al3  | 0.51090(8)  | 0.49836(4)  | 0.42765(4)   | 0.01241(17) |
| Al2  | 1.45512(8)  | 0.51334(4)  | 0.07023(4)   | 0.01245(17) |
| F1   | 1.000000    | 1.000000    | 0.000000     | 0.0171(5)   |
| F4   | 0.000000    | 0.000000    | 0.500000     | 0.0190(5)   |
| F2   | 1.500000    | 0.500000    | 0.000000     | 0.0153(5)   |
| F3   | 0.500000    | 0.500000    | 0.500000     | 0.0181(5)   |

## S-3 Quantum chemical calculations

Table S 9 SCF energy, FreeH energy and FreeH entropy of presented compounds. (BP86/def2-def-SV(P)/D3(BJ) )

| Compound                                                      | SCF /Hartree    | FreeH energy | FreeH entropy | COSMO DFB/Hartree | COSMO DCM/Hartree  |
|---------------------------------------------------------------|-----------------|--------------|---------------|-------------------|--------------------|
|                                                               |                 | [kJ/mol]     | [kJ/mol K]    | $\epsilon = 8.93$ | $\epsilon = 13.38$ |
| [Ca(HMB)oDFB <sub>2</sub> {f-al}] <sup>+</sup> 2 <sup>+</sup> | -5725.166289288 | 1765.47      | 1.74063       | -5725.2197376847  | -5725.2164611434   |
| [Sr(HMB)oDFB <sub>3</sub> {f-al}] <sup>+</sup> 5 <sup>+</sup> | -5508.784111417 | 2001.96      | 1.92245       | -5508.8442714488  | -5508.8403896611   |
| [Ba(HMB)oDFB <sub>3</sub> {f-al}] <sup>+</sup> 4 <sup>+</sup> | -5503.583757382 | 2003.98      | 1.93475       | -5503.6338738050  | -5503.6308525042   |
| [Ca(HMB)oDFB <sub>4</sub> ] <sup>2+</sup> 7 <sup>2+</sup>     | -2866.854410856 | 1683.52      | 1.19609       | -2867.0185296993  | -2867.0090879921   |
| [Sr(HMB)oDFB <sub>4</sub> ] <sup>2+</sup> 6 <sup>2+</sup>     | -2220.038458915 | 1682.68      | 1.22634       | -2220.2007673224  | -2220.1913875602   |
| [Ba(HMB)oDFB <sub>4</sub> ] <sup>2+</sup>                     | -2214.821898745 | 1681.97      | 1.25849       | -2214.9838152870  | -2214.9744720839   |
| F-Ca(HMB)oDFB <sub>2</sub> {f-al}                             | -5825.169460385 | 1772.60      | 1.80006       |                   | -5825.1856053590   |
| F-Sr(HMB)oDFB <sub>2</sub> {f-al}                             | -5178.347256196 | 1771.97      | 1.81809       |                   | -5178.3646423792   |
| Ba(HMB)oDFB <sub>2</sub> {f-al}                               | -5173.123266665 | 1771.81      | 1.81006       |                   | -5173.1419648063   |
| [F-Ca(HMB)oDFB <sub>3</sub> ] <sup>+</sup>                    | -2536.510662890 | 1454.51      | 1.05702       |                   | -2536.5608022626   |
| [F-Sr(HMB)oDFB <sub>3</sub> ] <sup>+</sup>                    | -2320.133267672 | 1692.09      | 1.23892       |                   | -2320.1848629439   |
| [F-Ba(HMB)oDFB <sub>3</sub> ] <sup>+</sup>                    | -2314.911646911 | 1691.56      | 1.26804       |                   | -2314.9633109872   |
| H-Ca(HMB)oDFB <sub>2</sub> {f-al}                             | -5725.883417646 | 1777.17      | 1.78788       |                   | -5725.9033928264   |
| H-Sr(HMB)oDFB <sub>2</sub> {f-al}                             | -5079.061452805 | 1775.75      | 1.79115       |                   | -5079.0834714081   |
| H-Ba(HMB)oDFB <sub>2</sub> {f-al}                             | -5073.838370815 | 1775.20      | 1.78700       |                   | -5073.8660490436   |
| [H-Ca(HMB)oDFB <sub>4</sub> ] <sup>+</sup>                    | -2867.673876950 | 1698.19      | 1.22031       |                   | -2867.7262895978   |
| [H-Sr(HMB)oDFB <sub>4</sub> ] <sup>+</sup>                    | -2220.848284775 | 1696.56      | 1.22036       |                   | -2220.9034685658   |



| Compound                                                         | SCF /Hartree    | FreeH energy | FreeH entropy | COSMO DFB/Hartree | COSMO DCM/Hartree  |
|------------------------------------------------------------------|-----------------|--------------|---------------|-------------------|--------------------|
|                                                                  |                 | [kJ/mol]     | [kJ/mol K]    | $\epsilon = 8.93$ | $\epsilon = 13.38$ |
| [H-Ba(HMB)oDFB <sub>4</sub> ] <sup>+</sup>                       | -2215.628495887 | 1695.26      | 1.25254       |                   | -2215.6861118948   |
| TMS <sup>+</sup>                                                 | -408.8229362860 | 297.92       | 0.35871       |                   | -408.8998081732    |
| TMSF                                                             | -508.9440076315 | 310.97       | 0.35438       |                   | -508.9476831331    |
| TMSH                                                             | -409.7051205360 | 322.40       | 0.33278       |                   | -409.7067280146    |
| B(C <sub>6</sub> F <sub>5</sub> ) <sub>3</sub>                   | -2206.833841130 | 471.80       | 0.80761       |                   | -2206.8384767034   |
| [F-B(C <sub>6</sub> F <sub>5</sub> ) <sub>3</sub> ] <sup>-</sup> | -2306.761000073 | 477.95       | 0.83999       |                   | -2306.8094516177   |
| [H-B(C <sub>6</sub> F <sub>5</sub> ) <sub>3</sub> ] <sup>-</sup> | -2207.533999697 | 492.76       | 0.83117       |                   | -2207.5805375446   |
| SbF <sub>5</sub>                                                 | -504.3473889830 | 47.25        | 0.35306       |                   | -504.3541263397    |
| [SbF <sub>6</sub> ] <sup>-</sup>                                 | -604.2900640637 | 55.65        | 0.37270       |                   | -604.3603604560    |
| Al(OR <sup>F</sup> ) <sub>3</sub>                                | -3619.007051245 | 541.05       | 1.05312       |                   | -3619.0099881445   |
| [F-Al(OR <sup>F</sup> ) <sub>3</sub> ] <sup>-</sup>              | -3718.966875203 | 549.76       | 1.12120       | -3719.0165703535  | -3719.0135782148   |
| [H-Al(OR <sup>F</sup> ) <sub>3</sub> ] <sup>-</sup>              | -3619.706895153 | 558.45       | 1.09480       |                   | -3619.7534163216   |
| oDFB·AlOR <sup>F</sup> <sub>3</sub>                              | -4049.460707085 | 781.47       | 1.23993       | -4049.4662816509  |                    |
| [μF-(AlOR <sup>F</sup> ) <sub>2</sub> ] <sup>-</sup>             | -7338.057560602 | 1100.10      | 1.97932       |                   | -7338.0944456007   |
| [Sr(HMB) <sub>2</sub> ] <sup>2+</sup>                            | -966.0017307724 | 1451.06      | 0.88925       | -966.2035236      |                    |
| [Sr(oDFB) <sub>8</sub> ] <sup>2</sup>                            | -3474.008175471 | 1913.62      | 1.56152       | -3474.160776      |                    |
| [Ga(HMB)] <sup>+</sup>                                           | -2392.531049289 | 726.50       | 0.54884       |                   |                    |
| [In(HMB)] <sup>+</sup>                                           | -469.5634901721 | 726.13       | 0.53802       |                   |                    |
| [Tl(HMB)] <sup>+</sup>                                           | -469.6645925246 | 725.92       | 0.54987       |                   |                    |
| F <sup>-</sup>                                                   | -99.689938761   |              |               |                   | -99.8190863141     |
| H <sup>-</sup>                                                   | -0.48829116996  |              |               |                   | -0.6576594152      |

[Ca(HMB)O<sub>2</sub>DFB<sub>2</sub>{f-a}]<sup>+</sup> 2<sup>+</sup>

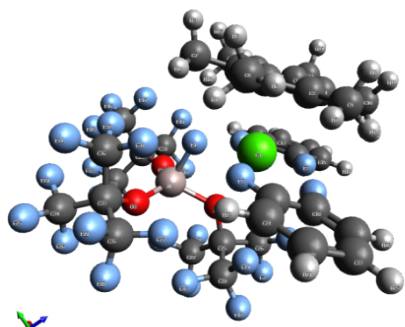

Atomic coordinates

|    |          |          |          |
|----|----------|----------|----------|
| Ca | -0.15826 | -0.38921 | 0.95701  |
| F  | -0.08599 | 1.10611  | -0.60962 |
| Al | 0.22695  | 0.33512  | -2.17273 |
| C  | -0.20863 | 2.30274  | 2.02075  |
| C  | -1.43141 | 1.73904  | 2.49045  |
| C  | -1.39652 | 0.64285  | 3.40091  |
| C  | -0.14271 | 0.14863  | 3.87820  |
| C  | 1.07999  | 0.74570  | 3.44619  |
| C  | 1.04243  | 1.81349  | 2.49745  |
| C  | -0.23128 | 3.48285  | 1.08001  |
| H  | -1.15438 | 3.52202  | 0.47560  |
| H  | 0.61554  | 3.46545  | 0.37007  |
| H  | -0.16600 | 4.43423  | 1.65875  |
| C  | -2.73175 | 2.37808  | 2.05459  |
| H  | -2.84247 | 2.37575  | 0.95062  |
| H  | -2.75849 | 3.44287  | 2.37494  |
| H  | -3.62288 | 1.88754  | 2.48594  |
| C  | -2.66871 | 0.06029  | 3.98048  |
| H  | -3.54960 | 0.20623  | 3.32895  |
| H  | -2.90153 | 0.54490  | 4.95722  |
| H  | -2.58321 | -1.02517 | 4.17802  |
| C  | -0.16449 | -0.96250 | 4.90765  |
| H  | -0.63917 | -1.88473 | 4.50584  |
| H  | -0.75707 | -0.66126 | 5.79895  |
| H  | 0.84140  | -1.23966 | 5.26860  |
| C  | 2.39737  | 0.33267  | 4.07246  |
| H  | 2.41148  | -0.72355 | 4.39779  |
| H  | 2.59557  | 0.95512  | 4.97567  |
| H  | 3.25884  | 0.46706  | 3.39322  |
| C  | 2.30021  | 2.50094  | 2.01239  |
| H  | 3.21732  | 2.12917  | 2.50262  |
| H  | 2.24599  | 3.59367  | 2.20792  |
| H  | 2.43301  | 2.38198  | 0.91550  |
| C  | 3.12042  | -1.22878 | 1.25176  |
| C  | 2.51290  | -2.19059 | 2.05965  |
| C  | 3.26036  | -3.10032 | 2.79744  |
| H  | 2.75412  | -3.85253 | 3.42084  |
| C  | 4.66355  | -3.01650 | 2.70988  |
| H  | 5.28126  | -3.72495 | 3.28268  |
| C  | 5.27611  | -2.04469 | 1.89896  |

|   |          |          |          |
|---|----------|----------|----------|
| H | 6.37384  | -1.99276 | 1.83742  |
| C | 4.50371  | -1.13327 | 1.15371  |
| H | 4.95092  | -0.36737 | 0.50518  |
| F | 2.29014  | -0.37086 | 0.57448  |
| F | 1.13457  | -2.18886 | 2.10609  |
| C | -3.12363 | -1.97231 | 1.51003  |
| C | -3.49920 | -0.90652 | 0.69215  |
| C | -4.83099 | -0.67075 | 0.37117  |
| H | -5.09219 | 0.16678  | -0.29123 |
| C | -5.79522 | -1.54700 | 0.90507  |
| H | -6.85756 | -1.38635 | 0.66589  |
| C | -5.41591 | -2.62340 | 1.72695  |
| H | -6.18136 | -3.30318 | 2.13136  |
| C | -4.06138 | -2.84968 | 2.04037  |
| H | -3.73817 | -3.68520 | 2.67918  |
| F | -1.77651 | -2.10079 | 1.78369  |
| F | -2.49238 | -0.10473 | 0.22147  |
| O | 0.05774  | -1.30616 | -1.34092 |
| C | 0.01970  | -2.55588 | -1.94595 |
| C | 0.62964  | -3.60963 | -0.96544 |
| F | -0.18459 | -3.75999 | 0.11065  |
| F | 0.80641  | -4.80214 | -1.53803 |
| F | 1.81977  | -3.17741 | -0.50064 |
| C | 0.86134  | -2.54567 | -3.27631 |
| F | 0.59824  | -1.36908 | -3.91856 |
| F | 2.17444  | -2.58546 | -3.03019 |
| F | 0.53753  | -3.54959 | -4.09227 |
| C | -1.47361 | -2.93809 | -2.27800 |
| F | -1.90857 | -2.25141 | -3.34289 |
| F | -1.61945 | -4.24908 | -2.51821 |
| F | -2.26158 | -2.61603 | -1.22614 |
| O | 1.91067  | 0.62344  | -2.42268 |
| C | 2.91868  | 1.32555  | -3.00276 |
| C | 2.71933  | 2.86887  | -2.76675 |
| F | 1.74131  | 3.34110  | -3.55981 |
| F | 3.83827  | 3.57192  | -2.99329 |
| F | 2.33428  | 3.08842  | -1.48481 |
| C | 4.26070  | 0.85501  | -2.33215 |
| F | 4.27521  | -0.48193 | -2.20140 |
| F | 4.36721  | 1.37427  | -1.07639 |
| F | 5.34235  | 1.23347  | -3.02597 |
| C | 2.96674  | 1.02692  | -4.54943 |
| F | 3.43802  | -0.21655 | -4.76798 |
| F | 3.74458  | 1.90129  | -5.20778 |
| F | 1.72278  | 1.08920  | -5.05841 |
| O | -1.06075 | 0.72719  | -3.24427 |
| C | -2.05416 | 1.57506  | -3.62283 |
| C | -1.75801 | 2.07067  | -5.09054 |
| F | -0.77444 | 2.99245  | -5.07234 |
| F | -2.84772 | 2.62126  | -5.65681 |
| F | -1.35168 | 1.04222  | -5.84427 |
| C | -3.41864 | 0.79152  | -3.58941 |
| F | -3.50013 | 0.06919  | -2.44421 |
| F | -3.50657 | -0.06666 | -4.61458 |
| F | -4.47903 | 1.61950  | -3.62803 |

|   |          |         |          |
|---|----------|---------|----------|
| C | -2.14140 | 2.81500 | -2.65877 |
| F | -2.72624 | 2.45869 | -1.48096 |
| F | -2.84444 | 3.82943 | -3.17472 |
| F | -0.90294 | 3.25533 | -2.36231 |

### Vibrational analysis

| mode | symmetry | wave number<br>cm <sup>**</sup> (-1) | IR intensity<br>km/mol | selection rules |       |
|------|----------|--------------------------------------|------------------------|-----------------|-------|
|      |          |                                      |                        | IR              | RAMAN |
| 1    |          | -0.00                                | 0.00000                | -               | -     |
| 2    |          | -0.00                                | 0.00000                | -               | -     |
| 3    |          | 0.00                                 | 0.00000                | -               | -     |
| 4    |          | 0.00                                 | 0.00000                | -               | -     |
| 5    |          | 0.00                                 | 0.00000                | -               | -     |
| 6    |          | 0.00                                 | 0.00000                | -               | -     |
| 7    | a        | 7.66                                 | 0.13703                | YES             | YES   |
| 8    | a        | 15.13                                | 0.17788                | YES             | YES   |
| 9    | a        | 18.43                                | 0.03700                | YES             | YES   |
| 10   | a        | 21.97                                | 0.21452                | YES             | YES   |
| 11   | a        | 23.20                                | 0.09402                | YES             | YES   |
| 12   | a        | 23.55                                | 0.33919                | YES             | YES   |
| 13   | a        | 25.85                                | 0.06372                | YES             | YES   |
| 14   | a        | 28.00                                | 0.38951                | YES             | YES   |
| 15   | a        | 32.30                                | 0.08813                | YES             | YES   |
| 16   | a        | 34.58                                | 0.79821                | YES             | YES   |
| 17   | a        | 37.39                                | 1.08051                | YES             | YES   |
| 18   | a        | 37.89                                | 0.48235                | YES             | YES   |
| 19   | a        | 42.28                                | 1.27638                | YES             | YES   |
| 20   | a        | 42.86                                | 0.35035                | YES             | YES   |
| 21   | a        | 43.44                                | 1.01251                | YES             | YES   |
| 22   | a        | 50.55                                | 0.56859                | YES             | YES   |
| 23   | a        | 53.16                                | 0.58566                | YES             | YES   |
| 24   | a        | 55.31                                | 0.22967                | YES             | YES   |
| 25   | a        | 60.73                                | 1.98049                | YES             | YES   |
| 26   | a        | 64.72                                | 0.44120                | YES             | YES   |
| 27   | a        | 65.62                                | 0.21695                | YES             | YES   |
| 28   | a        | 65.92                                | 0.64580                | YES             | YES   |
| 29   | a        | 68.35                                | 0.02043                | YES             | YES   |
| 30   | a        | 70.11                                | 0.19009                | YES             | YES   |
| 31   | a        | 73.11                                | 1.51668                | YES             | YES   |
| 32   | a        | 75.45                                | 0.17252                | YES             | YES   |
| 33   | a        | 77.53                                | 0.20696                | YES             | YES   |
| 34   | a        | 80.79                                | 0.67779                | YES             | YES   |
| 35   | a        | 81.34                                | 0.47664                | YES             | YES   |
| 36   | a        | 83.59                                | 0.24733                | YES             | YES   |
| 37   | a        | 84.74                                | 0.21490                | YES             | YES   |
| 38   | a        | 86.91                                | 0.74406                | YES             | YES   |
| 39   | a        | 89.18                                | 1.60811                | YES             | YES   |
| 40   | a        | 94.44                                | 0.41201                | YES             | YES   |
| 41   | a        | 98.94                                | 2.03735                | YES             | YES   |
| 42   | a        | 100.17                               | 1.14634                | YES             | YES   |
| 43   | a        | 102.92                               | 0.85536                | YES             | YES   |
| 44   | a        | 105.09                               | 0.81307                | YES             | YES   |
| 45   | a        | 107.17                               | 2.96786                | YES             | YES   |

|     |   |        |          |     |     |
|-----|---|--------|----------|-----|-----|
| 46  | a | 113.22 | 0.85505  | YES | YES |
| 47  | a | 121.39 | 0.86808  | YES | YES |
| 48  | a | 134.86 | 18.99054 | YES | YES |
| 49  | a | 136.95 | 0.91134  | YES | YES |
| 50  | a | 140.23 | 25.62029 | YES | YES |
| 51  | a | 148.93 | 11.32136 | YES | YES |
| 52  | a | 151.49 | 1.14699  | YES | YES |
| 53  | a | 156.00 | 12.30671 | YES | YES |
| 54  | a | 158.45 | 1.79417  | YES | YES |
| 55  | a | 158.67 | 0.30025  | YES | YES |
| 56  | a | 162.75 | 0.19939  | YES | YES |
| 57  | a | 165.24 | 11.14885 | YES | YES |
| 58  | a | 170.79 | 4.02230  | YES | YES |
| 59  | a | 172.54 | 2.54507  | YES | YES |
| 60  | a | 175.14 | 1.67837  | YES | YES |
| 61  | a | 181.27 | 0.48440  | YES | YES |
| 62  | a | 183.86 | 3.77749  | YES | YES |
| 63  | a | 188.29 | 1.04714  | YES | YES |
| 64  | a | 198.35 | 0.46693  | YES | YES |
| 65  | a | 199.20 | 11.72236 | YES | YES |
| 66  | a | 207.59 | 1.95680  | YES | YES |
| 67  | a | 211.13 | 9.37855  | YES | YES |
| 68  | a | 211.73 | 7.06656  | YES | YES |
| 69  | a | 214.17 | 39.06239 | YES | YES |
| 70  | a | 248.21 | 25.35693 | YES | YES |
| 71  | a | 257.12 | 2.39584  | YES | YES |
| 72  | a | 267.57 | 1.62658  | YES | YES |
| 73  | a | 275.78 | 3.60236  | YES | YES |
| 74  | a | 278.77 | 3.38832  | YES | YES |
| 75  | a | 283.17 | 5.82252  | YES | YES |
| 76  | a | 283.92 | 1.05056  | YES | YES |
| 77  | a | 284.24 | 0.14994  | YES | YES |
| 78  | a | 284.83 | 0.05186  | YES | YES |
| 79  | a | 288.64 | 4.39858  | YES | YES |
| 80  | a | 298.18 | 1.12569  | YES | YES |
| 81  | a | 298.70 | 0.47496  | YES | YES |
| 82  | a | 302.61 | 0.54028  | YES | YES |
| 83  | a | 308.85 | 3.95163  | YES | YES |
| 84  | a | 309.68 | 4.13745  | YES | YES |
| 85  | a | 314.12 | 13.62550 | YES | YES |
| 86  | a | 315.74 | 0.42579  | YES | YES |
| 87  | a | 317.04 | 1.94895  | YES | YES |
| 88  | a | 318.29 | 5.51057  | YES | YES |
| 89  | a | 319.59 | 2.18250  | YES | YES |
| 90  | a | 320.94 | 2.66263  | YES | YES |
| 91  | a | 322.94 | 2.08597  | YES | YES |
| 92  | a | 326.48 | 0.36706  | YES | YES |
| 93  | a | 330.88 | 1.09845  | YES | YES |
| 94  | a | 331.61 | 0.60402  | YES | YES |
| 95  | a | 347.57 | 0.07961  | YES | YES |
| 96  | a | 350.45 | 0.42570  | YES | YES |
| 97  | a | 355.00 | 15.46826 | YES | YES |
| 98  | a | 357.34 | 3.67024  | YES | YES |
| 99  | a | 368.32 | 17.02699 | YES | YES |
| 100 | a | 373.96 | 1.27628  | YES | YES |

|     |   |        |           |     |     |
|-----|---|--------|-----------|-----|-----|
| 101 | a | 377.75 | 7.17515   | YES | YES |
| 102 | a | 382.44 | 3.26018   | YES | YES |
| 103 | a | 393.11 | 44.71204  | YES | YES |
| 104 | a | 404.31 | 0.06037   | YES | YES |
| 105 | a | 424.35 | 5.99952   | YES | YES |
| 106 | a | 425.82 | 39.17458  | YES | YES |
| 107 | a | 436.18 | 0.05811   | YES | YES |
| 108 | a | 437.86 | 0.19366   | YES | YES |
| 109 | a | 438.76 | 5.87319   | YES | YES |
| 110 | a | 443.41 | 0.22404   | YES | YES |
| 111 | a | 444.96 | 1.56664   | YES | YES |
| 112 | a | 448.43 | 4.10686   | YES | YES |
| 113 | a | 448.90 | 53.99785  | YES | YES |
| 114 | a | 462.08 | 0.00983   | YES | YES |
| 115 | a | 484.27 | 26.43802  | YES | YES |
| 116 | a | 516.96 | 6.31692   | YES | YES |
| 117 | a | 517.94 | 0.38905   | YES | YES |
| 118 | a | 518.63 | 6.17296   | YES | YES |
| 119 | a | 519.15 | 7.81393   | YES | YES |
| 120 | a | 519.98 | 1.28227   | YES | YES |
| 121 | a | 520.92 | 3.07729   | YES | YES |
| 122 | a | 523.74 | 0.76741   | YES | YES |
| 123 | a | 524.62 | 3.35397   | YES | YES |
| 124 | a | 526.00 | 2.75805   | YES | YES |
| 125 | a | 527.98 | 3.11913   | YES | YES |
| 126 | a | 540.48 | 2.56739   | YES | YES |
| 127 | a | 540.60 | 0.13729   | YES | YES |
| 128 | a | 541.40 | 0.40289   | YES | YES |
| 129 | a | 542.12 | 4.54489   | YES | YES |
| 130 | a | 545.64 | 14.27867  | YES | YES |
| 131 | a | 552.14 | 1.86673   | YES | YES |
| 132 | a | 553.39 | 0.82098   | YES | YES |
| 133 | a | 554.10 | 0.01967   | YES | YES |
| 134 | a | 554.44 | 0.77807   | YES | YES |
| 135 | a | 555.08 | 0.77258   | YES | YES |
| 136 | a | 557.37 | 0.80539   | YES | YES |
| 137 | a | 558.24 | 33.55101  | YES | YES |
| 138 | a | 558.99 | 10.04928  | YES | YES |
| 139 | a | 561.02 | 0.33980   | YES | YES |
| 140 | a | 565.41 | 19.61616  | YES | YES |
| 141 | a | 569.03 | 0.09469   | YES | YES |
| 142 | a | 573.31 | 30.59723  | YES | YES |
| 143 | a | 577.74 | 0.14624   | YES | YES |
| 144 | a | 580.64 | 0.18521   | YES | YES |
| 145 | a | 636.31 | 162.70744 | YES | YES |
| 146 | a | 678.86 | 0.10975   | YES | YES |
| 147 | a | 680.09 | 0.29161   | YES | YES |
| 148 | a | 689.53 | 0.25399   | YES | YES |
| 149 | a | 706.36 | 5.62499   | YES | YES |
| 150 | a | 706.65 | 14.15923  | YES | YES |
| 151 | a | 708.37 | 32.55714  | YES | YES |
| 152 | a | 708.80 | 19.35273  | YES | YES |
| 153 | a | 709.92 | 45.76022  | YES | YES |
| 154 | a | 710.65 | 53.76454  | YES | YES |
| 155 | a | 718.09 | 49.91287  | YES | YES |

|     |   |         |           |     |     |
|-----|---|---------|-----------|-----|-----|
| 156 | a | 735.93  | 2.23452   | YES | YES |
| 157 | a | 740.25  | 0.51768   | YES | YES |
| 158 | a | 747.49  | 62.86708  | YES | YES |
| 159 | a | 750.45  | 73.84094  | YES | YES |
| 160 | a | 753.74  | 149.72648 | YES | YES |
| 161 | a | 756.93  | 25.10139  | YES | YES |
| 162 | a | 769.02  | 20.94318  | YES | YES |
| 163 | a | 789.63  | 0.77726   | YES | YES |
| 164 | a | 797.80  | 3.90199   | YES | YES |
| 165 | a | 817.13  | 0.69873   | YES | YES |
| 166 | a | 818.58  | 19.55916  | YES | YES |
| 167 | a | 828.46  | 17.90131  | YES | YES |
| 168 | a | 839.51  | 1.00120   | YES | YES |
| 169 | a | 844.52  | 0.53837   | YES | YES |
| 170 | a | 892.57  | 22.63008  | YES | YES |
| 171 | a | 929.35  | 4.03026   | YES | YES |
| 172 | a | 933.91  | 2.38491   | YES | YES |
| 173 | a | 950.31  | 0.11717   | YES | YES |
| 174 | a | 953.30  | 53.54245  | YES | YES |
| 175 | a | 956.24  | 78.45358  | YES | YES |
| 176 | a | 958.64  | 3.66369   | YES | YES |
| 177 | a | 960.80  | 144.40096 | YES | YES |
| 178 | a | 965.55  | 135.37296 | YES | YES |
| 179 | a | 966.28  | 230.99310 | YES | YES |
| 180 | a | 973.66  | 12.87771  | YES | YES |
| 181 | a | 973.98  | 292.38480 | YES | YES |
| 182 | a | 977.50  | 1.87535   | YES | YES |
| 183 | a | 978.95  | 0.42719   | YES | YES |
| 184 | a | 979.70  | 11.80462  | YES | YES |
| 185 | a | 1001.52 | 6.29136   | YES | YES |
| 186 | a | 1002.70 | 3.01109   | YES | YES |
| 187 | a | 1015.29 | 5.90938   | YES | YES |
| 188 | a | 1016.90 | 5.21537   | YES | YES |
| 189 | a | 1020.89 | 1.47076   | YES | YES |
| 190 | a | 1025.31 | 2.16975   | YES | YES |
| 191 | a | 1031.45 | 0.09802   | YES | YES |
| 192 | a | 1048.44 | 19.97241  | YES | YES |
| 193 | a | 1050.33 | 13.76248  | YES | YES |
| 194 | a | 1072.46 | 0.21678   | YES | YES |
| 195 | a | 1075.16 | 7.63996   | YES | YES |
| 196 | a | 1076.95 | 10.09819  | YES | YES |
| 197 | a | 1078.48 | 25.26699  | YES | YES |
| 198 | a | 1081.86 | 0.12095   | YES | YES |
| 199 | a | 1088.79 | 4.03158   | YES | YES |
| 200 | a | 1089.39 | 6.37295   | YES | YES |
| 201 | a | 1092.50 | 20.12850  | YES | YES |
| 202 | a | 1135.66 | 11.36635  | YES | YES |
| 203 | a | 1138.53 | 12.22213  | YES | YES |
| 204 | a | 1139.07 | 0.45830   | YES | YES |
| 205 | a | 1139.39 | 16.83741  | YES | YES |
| 206 | a | 1143.75 | 15.30857  | YES | YES |
| 207 | a | 1149.61 | 18.95163  | YES | YES |
| 208 | a | 1156.25 | 42.46397  | YES | YES |
| 209 | a | 1161.18 | 204.74168 | YES | YES |
| 210 | a | 1163.52 | 68.65489  | YES | YES |

|     |   |         |           |     |     |
|-----|---|---------|-----------|-----|-----|
| 211 | a | 1172.08 | 47.54859  | YES | YES |
| 212 | a | 1174.64 | 12.70814  | YES | YES |
| 213 | a | 1182.17 | 0.93604   | YES | YES |
| 214 | a | 1182.98 | 20.86467  | YES | YES |
| 215 | a | 1192.22 | 23.20875  | YES | YES |
| 216 | a | 1195.58 | 3.89172   | YES | YES |
| 217 | a | 1201.57 | 17.68985  | YES | YES |
| 218 | a | 1205.11 | 14.64140  | YES | YES |
| 219 | a | 1207.97 | 13.69563  | YES | YES |
| 220 | a | 1217.64 | 265.60674 | YES | YES |
| 221 | a | 1225.95 | 100.30260 | YES | YES |
| 222 | a | 1229.58 | 44.07193  | YES | YES |
| 223 | a | 1237.25 | 368.26526 | YES | YES |
| 224 | a | 1238.88 | 372.82479 | YES | YES |
| 225 | a | 1244.53 | 849.04253 | YES | YES |
| 226 | a | 1244.94 | 652.41478 | YES | YES |
| 227 | a | 1247.39 | 32.34826  | YES | YES |
| 228 | a | 1248.45 | 236.71630 | YES | YES |
| 229 | a | 1248.75 | 243.32543 | YES | YES |
| 230 | a | 1250.55 | 3.30028   | YES | YES |
| 231 | a | 1253.76 | 830.98723 | YES | YES |
| 232 | a | 1262.79 | 682.12853 | YES | YES |
| 233 | a | 1269.57 | 515.40215 | YES | YES |
| 234 | a | 1272.70 | 405.49245 | YES | YES |
| 235 | a | 1298.21 | 141.58845 | YES | YES |
| 236 | a | 1298.58 | 14.61625  | YES | YES |
| 237 | a | 1312.63 | 0.35474   | YES | YES |
| 238 | a | 1345.75 | 190.98273 | YES | YES |
| 239 | a | 1352.01 | 109.26279 | YES | YES |
| 240 | a | 1357.02 | 0.10923   | YES | YES |
| 241 | a | 1359.59 | 1.36153   | YES | YES |
| 242 | a | 1364.69 | 2.22787   | YES | YES |
| 243 | a | 1366.12 | 14.85740  | YES | YES |
| 244 | a | 1371.31 | 10.55075  | YES | YES |
| 245 | a | 1374.32 | 12.74298  | YES | YES |
| 246 | a | 1382.42 | 7.22613   | YES | YES |
| 247 | a | 1382.56 | 0.93927   | YES | YES |
| 248 | a | 1386.38 | 1.30471   | YES | YES |
| 249 | a | 1393.19 | 7.99507   | YES | YES |
| 250 | a | 1408.82 | 8.52154   | YES | YES |
| 251 | a | 1412.09 | 6.98427   | YES | YES |
| 252 | a | 1415.39 | 0.29118   | YES | YES |
| 253 | a | 1425.02 | 24.81076  | YES | YES |
| 254 | a | 1426.29 | 5.45127   | YES | YES |
| 255 | a | 1430.43 | 25.17025  | YES | YES |
| 256 | a | 1440.22 | 28.87050  | YES | YES |
| 257 | a | 1444.69 | 26.77556  | YES | YES |
| 258 | a | 1446.93 | 2.30203   | YES | YES |
| 259 | a | 1455.87 | 3.68342   | YES | YES |
| 260 | a | 1459.27 | 1.17993   | YES | YES |
| 261 | a | 1459.51 | 12.90842  | YES | YES |
| 262 | a | 1464.34 | 34.94974  | YES | YES |
| 263 | a | 1471.10 | 23.47228  | YES | YES |
| 264 | a | 1493.13 | 365.91984 | YES | YES |
| 265 | a | 1495.59 | 80.12346  | YES | YES |



|     |   |         |          |     |     |
|-----|---|---------|----------|-----|-----|
| 266 | a | 1553.25 | 0.99626  | YES | YES |
| 267 | a | 1558.79 | 0.24307  | YES | YES |
| 268 | a | 1609.93 | 0.02106  | YES | YES |
| 269 | a | 1611.12 | 0.34879  | YES | YES |
| 270 | a | 1639.41 | 12.68492 | YES | YES |
| 271 | a | 1640.75 | 9.75004  | YES | YES |
| 272 | a | 2948.33 | 4.30438  | YES | YES |
| 273 | a | 2951.47 | 5.88852  | YES | YES |
| 274 | a | 2955.18 | 2.57428  | YES | YES |
| 275 | a | 2956.27 | 5.83149  | YES | YES |
| 276 | a | 2966.84 | 2.91108  | YES | YES |
| 277 | a | 2967.52 | 4.05479  | YES | YES |
| 278 | a | 3020.50 | 4.69875  | YES | YES |
| 279 | a | 3035.32 | 2.06458  | YES | YES |
| 280 | a | 3042.24 | 0.83548  | YES | YES |
| 281 | a | 3046.42 | 9.81784  | YES | YES |
| 282 | a | 3055.49 | 6.32314  | YES | YES |
| 283 | a | 3070.23 | 0.90541  | YES | YES |
| 284 | a | 3086.13 | 2.81634  | YES | YES |
| 285 | a | 3089.14 | 2.68155  | YES | YES |
| 286 | a | 3095.52 | 13.33028 | YES | YES |
| 287 | a | 3098.92 | 17.52223 | YES | YES |
| 288 | a | 3101.87 | 4.98804  | YES | YES |
| 289 | a | 3113.26 | 0.62548  | YES | YES |
| 290 | a | 3124.81 | 1.02058  | YES | YES |
| 291 | a | 3124.91 | 0.77974  | YES | YES |
| 292 | a | 3134.68 | 1.30588  | YES | YES |
| 293 | a | 3134.78 | 1.54004  | YES | YES |
| 294 | a | 3141.84 | 1.42535  | YES | YES |
| 295 | a | 3141.93 | 1.74762  | YES | YES |
| 296 | a | 3152.80 | 3.96260  | YES | YES |
| 297 | a | 3158.68 | 12.46511 | YES | YES |

Charge analysis by NBO, PABOON & QTAIM

| Atom | Charge<br>(NBO) | Charge<br>(PABOON) | Charge<br>(QTAIM) |
|------|-----------------|--------------------|-------------------|
| 1 ca | 1.76875         | 1.3150             | 1.617964          |
| 2 f  | -0.74113        | -0.3250            | -0.849804         |
| 3 al | 1.95774         | 0.3391             | 2.550191          |
| 4 c  | -0.04934        | 0.0572             | -0.050827         |
| 5 c  | -0.07149        | 0.0435             | -0.067007         |
| 6 c  | -0.09110        | 0.0309             | -0.083345         |
| 7 c  | -0.07383        | 0.0555             | -0.069548         |
| 8 c  | -0.07714        | 0.0464             | -0.067622         |
| 9 c  | -0.06085        | 0.0453             | -0.063950         |
| 10 c | -0.65892        | -0.1894            | -0.042770         |
| 11 h | 0.25150         | 0.0579             | 0.072521          |
| 12 h | 0.24726         | 0.0503             | 0.048267          |
| 13 h | 0.24030         | 0.0469             | 0.058628          |
| 14 c | -0.65951        | -0.2031            | -0.050879         |
| 15 h | 0.24789         | 0.0664             | 0.068441          |
| 16 h | 0.25311         | 0.0502             | 0.057343          |
| 17 h | 0.23126         | 0.0374             | 0.036762          |
| 18 c | -0.65815        | -0.1862            | -0.048275         |
| 19 h | 0.23348         | 0.0452             | 0.039347          |

|      |          |         |           |
|------|----------|---------|-----------|
| 20 h | 0.25587  | 0.0546  | 0.059562  |
| 21 h | 0.23333  | 0.0310  | 0.034890  |
| 22 c | -0.65223 | -0.1892 | -0.043037 |
| 23 h | 0.23486  | 0.0458  | 0.036202  |
| 24 h | 0.24881  | 0.0454  | 0.053873  |
| 25 h | 0.23466  | 0.0407  | 0.043452  |
| 26 c | -0.65529 | -0.2041 | -0.048703 |
| 27 h | 0.22997  | 0.0455  | 0.033663  |
| 28 h | 0.25757  | 0.0552  | 0.061035  |
| 29 h | 0.23434  | 0.0503  | 0.040274  |
| 30 c | -0.66006 | -0.2023 | -0.052042 |
| 31 h | 0.23236  | 0.0385  | 0.038608  |
| 32 h | 0.25039  | 0.0476  | 0.055607  |
| 33 h | 0.25340  | 0.0742  | 0.075872  |
| 34 c | 0.33740  | 0.2132  | 0.448659  |
| 35 c | 0.33093  | 0.2020  | 0.432928  |
| 36 c | -0.26740 | -0.0135 | -0.005245 |
| 37 h | 0.26019  | 0.0233  | 0.110071  |
| 38 c | -0.20214 | 0.0206  | -0.015979 |
| 39 h | 0.25127  | 0.0280  | 0.097364  |
| 40 c | -0.20065 | 0.0200  | -0.015377 |
| 41 h | 0.25207  | 0.0290  | 0.098428  |
| 42 c | -0.25733 | -0.0169 | -0.003208 |
| 43 h | 0.26483  | 0.0389  | 0.141115  |
| 44 f | -0.35537 | -0.1674 | -0.620061 |
| 45 f | -0.37185 | -0.2145 | -0.623541 |
| 46 c | 0.33345  | 0.2058  | 0.429407  |
| 47 c | 0.33570  | 0.2076  | 0.452588  |
| 48 c | -0.25645 | -0.0097 | 0.002195  |
| 49 h | 0.26729  | 0.0341  | 0.130307  |
| 50 c | -0.20100 | 0.0168  | -0.016876 |
| 51 h | 0.25213  | 0.0296  | 0.100428  |
| 52 c | -0.20183 | 0.0197  | -0.014377 |
| 53 h | 0.25136  | 0.0283  | 0.096848  |
| 54 c | -0.26439 | -0.0133 | -0.002533 |
| 55 h | 0.26013  | 0.0234  | 0.110815  |
| 56 f | -0.37252 | -0.2182 | -0.621660 |
| 57 f | -0.35641 | -0.1734 | -0.617932 |
| 58 o | -1.00243 | -0.2812 | -1.296803 |
| 59 c | 0.01681  | -0.0593 | 0.647655  |
| 60 c | 1.10588  | 0.5320  | 1.657085  |
| 61 f | -0.35465 | -0.1905 | -0.583633 |
| 62 f | -0.32613 | -0.1513 | -0.575835 |
| 63 f | -0.34416 | -0.1702 | -0.592013 |
| 64 c | 1.10574  | 0.5333  | 1.671072  |
| 65 f | -0.33022 | -0.1302 | -0.589225 |
| 66 f | -0.32499 | -0.1504 | -0.574133 |
| 67 f | -0.32333 | -0.1495 | -0.574150 |
| 68 c | 1.10936  | 0.5311  | 1.676975  |
| 69 f | -0.32855 | -0.1527 | -0.576360 |
| 70 f | -0.33447 | -0.1646 | -0.575613 |
| 71 f | -0.35394 | -0.1835 | -0.596166 |
| 72 o | -0.96053 | -0.1873 | -1.342393 |
| 73 c | 0.03310  | -0.0709 | 0.726689  |
| 74 c | 1.10435  | 0.5268  | 1.654168  |

|    |   |          |         |           |
|----|---|----------|---------|-----------|
| 75 | f | -0.33664 | -0.1658 | -0.578497 |
| 76 | f | -0.33606 | -0.1661 | -0.578898 |
| 77 | f | -0.35443 | -0.1817 | -0.589788 |
| 78 | c | 1.10848  | 0.5356  | 1.650442  |
| 79 | f | -0.34075 | -0.1678 | -0.585391 |
| 80 | f | -0.36283 | -0.1996 | -0.588777 |
| 81 | f | -0.33608 | -0.1643 | -0.579527 |
| 82 | c | 1.10556  | 0.5311  | 1.674132  |
| 83 | f | -0.34525 | -0.1821 | -0.580092 |
| 84 | f | -0.33909 | -0.1713 | -0.579300 |
| 85 | f | -0.33713 | -0.1578 | -0.581471 |
| 86 | o | -0.95954 | -0.1917 | -1.341619 |
| 87 | c | 0.03438  | -0.0626 | 0.723809  |
| 88 | c | 1.11050  | 0.5378  | 1.688011  |
| 89 | f | -0.34510 | -0.1816 | -0.579589 |
| 90 | f | -0.34433 | -0.1799 | -0.580080 |
| 91 | f | -0.33405 | -0.1614 | -0.578241 |
| 92 | c | 1.10764  | 0.5377  | 1.659635  |
| 93 | f | -0.35823 | -0.1924 | -0.593020 |
| 94 | f | -0.33555 | -0.1661 | -0.578963 |
| 95 | f | -0.34436 | -0.1780 | -0.581210 |
| 96 | c | 1.10030  | 0.5231  | 1.638822  |
| 97 | f | -0.36085 | -0.1967 | -0.590835 |
| 98 | f | -0.33145 | -0.1577 | -0.579027 |
| 99 | f | -0.33419 | -0.1522 | -0.586904 |

[Sr(HMB)oDFB<sub>3</sub>{f-al}]<sup>+</sup> 5<sup>+</sup>

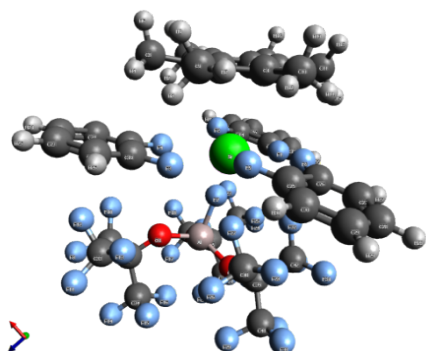

Atomic coordinates

|   |         |          |          |
|---|---------|----------|----------|
| C | 3.23188 | 0.18850  | -2.61633 |
| C | 3.40702 | -1.15901 | -2.18250 |
| C | 2.59557 | -2.20552 | -2.71271 |
| C | 1.60935 | -1.90079 | -3.69471 |
| C | 1.43642 | -0.55420 | -4.13410 |
| C | 2.23232 | 0.49688  | -3.58861 |
| C | 4.19005 | 1.23531  | -2.08444 |
| H | 5.23971 | 0.96550  | -2.33427 |
| H | 4.13363 | 1.32017  | -0.97760 |
| H | 4.00865 | 2.24275  | -2.49891 |
| C | 4.56804 | -1.50341 | -1.27276 |
| H | 4.38598 | -2.40706 | -0.66106 |
| H | 4.82906 | -0.68342 | -0.57779 |
| H | 5.47878 | -1.70685 | -1.88466 |
| C | 2.88601 | -3.62950 | -2.28439 |

|    |          |          |          |
|----|----------|----------|----------|
| H  | 2.20947  | -4.36837 | -2.74976 |
| H  | 2.80284  | -3.75455 | -1.18301 |
| H  | 3.92419  | -3.91811 | -2.56106 |
| C  | 0.80759  | -2.98729 | -4.38124 |
| H  | 1.28371  | -3.26622 | -5.35009 |
| H  | -0.22363 | -2.66250 | -4.62251 |
| H  | 0.72812  | -3.91461 | -3.78472 |
| C  | 0.45393  | -0.28266 | -5.25627 |
| H  | 0.65480  | -0.94751 | -6.12407 |
| H  | 0.50046  | 0.75623  | -5.62857 |
| H  | -0.59623 | -0.47510 | -4.94337 |
| C  | 2.06812  | 1.90233  | -4.13532 |
| H  | 2.52921  | 1.98679  | -5.14590 |
| H  | 2.54218  | 2.67193  | -3.50061 |
| H  | 1.00322  | 2.19007  | -4.24293 |
| C  | -0.53500 | 2.89979  | -2.06626 |
| C  | 0.68478  | 3.17037  | -1.44497 |
| C  | 1.15967  | 4.47237  | -1.32646 |
| H  | 2.12091  | 4.65868  | -0.82461 |
| C  | 0.36796  | 5.51503  | -1.83979 |
| H  | 0.71889  | 6.55395  | -1.74597 |
| C  | -0.86900 | 5.24271  | -2.44915 |
| H  | -1.48749 | 6.06783  | -2.83388 |
| C  | -1.33472 | 3.92053  | -2.56884 |
| H  | -2.30007 | 3.67878  | -3.03784 |
| F  | -0.91054 | 1.58046  | -2.18730 |
| F  | 1.40953  | 2.10693  | -0.97516 |
| C  | 2.51723  | -2.04699 | 1.37150  |
| C  | 2.96670  | -0.73461 | 1.51062  |
| C  | 4.10320  | -0.43915 | 2.25583  |
| H  | 4.42665  | 0.60623  | 2.36762  |
| C  | 4.79807  | -1.50791 | 2.84991  |
| H  | 5.69811  | -1.29800 | 3.44767  |
| C  | 4.34938  | -2.83172 | 2.69773  |
| H  | 4.89820  | -3.65743 | 3.17568  |
| C  | 3.18892  | -3.11505 | 1.95517  |
| H  | 2.80062  | -4.13768 | 1.83847  |
| F  | 1.39226  | -2.25090 | 0.60320  |
| F  | 2.27522  | 0.24309  | 0.84539  |
| C  | -1.43234 | -3.38818 | -1.95976 |
| C  | -2.10982 | -2.36413 | -2.62353 |
| C  | -3.35298 | -2.57268 | -3.20975 |
| H  | -3.87182 | -1.74013 | -3.70735 |
| C  | -3.90770 | -3.86352 | -3.12962 |
| H  | -4.89260 | -4.05483 | -3.58212 |
| C  | -3.22057 | -4.90084 | -2.47499 |
| H  | -3.66706 | -5.90523 | -2.41687 |
| C  | -1.96822 | -4.66917 | -1.87662 |
| H  | -1.41952 | -5.45867 | -1.34145 |
| F  | -0.23413 | -3.07389 | -1.37590 |
| F  | -1.49876 | -1.13177 | -2.66663 |
| Sr | 0.32927  | -0.37982 | -0.90352 |
| F  | -0.55438 | 0.97472  | 0.72603  |
| Al | -1.34051 | 0.98646  | 2.31484  |
| O  | -0.19325 | -0.05364 | 3.16888  |

|   |          |          |          |
|---|----------|----------|----------|
| C | 0.02672  | -0.32010 | 4.49339  |
| C | 0.91239  | 0.81925  | 5.12591  |
| F | 1.48439  | 0.43318  | 6.28205  |
| F | 0.17274  | 1.91601  | 5.36481  |
| F | 1.89042  | 1.16473  | 4.26149  |
| C | 0.78585  | -1.69245 | 4.61011  |
| F | 0.63637  | -2.25671 | 5.81941  |
| F | 2.11251  | -1.52698 | 4.39848  |
| F | 0.33733  | -2.55657 | 3.67731  |
| C | -1.33609 | -0.43313 | 5.27120  |
| F | -1.19324 | -0.32544 | 6.59805  |
| F | -1.94117 | -1.60387 | 4.99406  |
| F | -2.16048 | 0.55643  | 4.84924  |
| O | -1.38259 | 2.62169  | 2.88111  |
| C | -2.04290 | 3.80519  | 2.76782  |
| C | -1.22141 | 4.87959  | 3.57473  |
| F | -1.40266 | 4.71666  | 4.89592  |
| F | 0.09031  | 4.74316  | 3.31575  |
| F | -1.58925 | 6.13563  | 3.24545  |
| C | -3.50098 | 3.69426  | 3.35404  |
| F | -3.48488 | 3.01970  | 4.51078  |
| F | -4.04987 | 4.90479  | 3.56640  |
| F | -4.29557 | 3.01836  | 2.49288  |
| C | -2.12025 | 4.23242  | 1.25806  |
| F | -0.90637 | 4.63869  | 0.82216  |
| F | -3.00023 | 5.21560  | 1.02119  |
| F | -2.47131 | 3.16546  | 0.49430  |
| O | -2.91273 | 0.26525  | 2.05208  |
| C | -3.64138 | -0.66461 | 1.40607  |
| C | -2.80859 | -1.97708 | 1.17649  |
| F | -2.54030 | -2.60432 | 2.31559  |
| F | -1.56551 | -1.64461 | 0.62479  |
| F | -3.37508 | -2.83748 | 0.31939  |
| C | -4.90260 | -1.02168 | 2.29328  |
| F | -4.52144 | -1.21633 | 3.55982  |
| F | -5.51213 | -2.14380 | 1.84874  |
| F | -5.79075 | -0.01694 | 2.26295  |
| C | -4.11926 | -0.09353 | 0.01884  |
| F | -3.04223 | 0.00133  | -0.83251 |
| F | -4.61473 | 1.13219  | 0.15261  |
| F | -5.02868 | -0.87569 | -0.59019 |

### Vibrational analysis

| mode | symmetry | wave number<br>cm**(-1) | IR intensity<br>km/mol | selection rules |       |
|------|----------|-------------------------|------------------------|-----------------|-------|
|      |          |                         |                        | IR              | RAMAN |
| 1    |          | -0.00                   | 0.00000                | -               | -     |
| 2    |          | -0.00                   | 0.00000                | -               | -     |
| 3    |          | 0.00                    | 0.00000                | -               | -     |
| 4    |          | 0.00                    | 0.00000                | -               | -     |
| 5    |          | 0.00                    | 0.00000                | -               | -     |
| 6    |          | 0.00                    | 0.00000                | -               | -     |
| 7    | a        | 6.67                    | 0.03474                | YES             | YES   |
| 8    | a        | 13.11                   | 0.09867                | YES             | YES   |
| 9    | a        | 15.02                   | 0.86536                | YES             | YES   |

|    |   |        |          |     |     |
|----|---|--------|----------|-----|-----|
| 10 | a | 17.23  | 1.43987  | YES | YES |
| 11 | a | 20.52  | 0.47365  | YES | YES |
| 12 | a | 21.90  | 0.22622  | YES | YES |
| 13 | a | 22.91  | 0.21744  | YES | YES |
| 14 | a | 26.51  | 0.47708  | YES | YES |
| 15 | a | 27.40  | 0.14217  | YES | YES |
| 16 | a | 29.04  | 0.46756  | YES | YES |
| 17 | a | 31.86  | 0.73170  | YES | YES |
| 18 | a | 34.43  | 0.35990  | YES | YES |
| 19 | a | 35.41  | 0.27704  | YES | YES |
| 20 | a | 37.65  | 0.31128  | YES | YES |
| 21 | a | 39.58  | 1.05700  | YES | YES |
| 22 | a | 45.11  | 1.62281  | YES | YES |
| 23 | a | 47.44  | 1.52467  | YES | YES |
| 24 | a | 52.07  | 0.33321  | YES | YES |
| 25 | a | 55.85  | 1.63776  | YES | YES |
| 26 | a | 56.95  | 0.27693  | YES | YES |
| 27 | a | 58.41  | 0.48558  | YES | YES |
| 28 | a | 61.00  | 0.26376  | YES | YES |
| 29 | a | 61.84  | 0.03727  | YES | YES |
| 30 | a | 64.30  | 0.14284  | YES | YES |
| 31 | a | 66.22  | 0.20746  | YES | YES |
| 32 | a | 66.38  | 0.73952  | YES | YES |
| 33 | a | 70.33  | 0.47028  | YES | YES |
| 34 | a | 71.73  | 0.37116  | YES | YES |
| 35 | a | 73.29  | 0.88492  | YES | YES |
| 36 | a | 75.78  | 2.01476  | YES | YES |
| 37 | a | 78.82  | 0.24550  | YES | YES |
| 38 | a | 79.81  | 1.08432  | YES | YES |
| 39 | a | 81.30  | 0.62184  | YES | YES |
| 40 | a | 82.55  | 0.37778  | YES | YES |
| 41 | a | 85.13  | 1.99479  | YES | YES |
| 42 | a | 85.98  | 0.90116  | YES | YES |
| 43 | a | 87.71  | 0.58836  | YES | YES |
| 44 | a | 90.30  | 0.15930  | YES | YES |
| 45 | a | 90.62  | 0.91344  | YES | YES |
| 46 | a | 94.32  | 0.26246  | YES | YES |
| 47 | a | 94.59  | 6.69183  | YES | YES |
| 48 | a | 96.65  | 0.23549  | YES | YES |
| 49 | a | 97.77  | 1.92832  | YES | YES |
| 50 | a | 102.03 | 4.30832  | YES | YES |
| 51 | a | 106.11 | 3.05553  | YES | YES |
| 52 | a | 112.44 | 30.45705 | YES | YES |
| 53 | a | 127.52 | 0.29774  | YES | YES |
| 54 | a | 129.36 | 0.93579  | YES | YES |
| 55 | a | 138.40 | 10.01118 | YES | YES |
| 56 | a | 139.60 | 8.35255  | YES | YES |
| 57 | a | 150.42 | 2.82912  | YES | YES |
| 58 | a | 152.49 | 20.55437 | YES | YES |
| 59 | a | 154.51 | 0.97608  | YES | YES |
| 60 | a | 155.42 | 0.30809  | YES | YES |
| 61 | a | 157.19 | 0.26060  | YES | YES |
| 62 | a | 160.61 | 3.21196  | YES | YES |
| 63 | a | 161.99 | 3.17898  | YES | YES |
| 64 | a | 164.71 | 0.83992  | YES | YES |

|     |   |        |          |     |     |
|-----|---|--------|----------|-----|-----|
| 65  | a | 165.82 | 0.71592  | YES | YES |
| 66  | a | 168.07 | 1.68171  | YES | YES |
| 67  | a | 172.59 | 0.07013  | YES | YES |
| 68  | a | 175.71 | 3.19140  | YES | YES |
| 69  | a | 182.43 | 2.52843  | YES | YES |
| 70  | a | 190.58 | 4.83947  | YES | YES |
| 71  | a | 193.24 | 5.40003  | YES | YES |
| 72  | a | 200.87 | 1.20692  | YES | YES |
| 73  | a | 201.67 | 0.92685  | YES | YES |
| 74  | a | 205.22 | 2.35381  | YES | YES |
| 75  | a | 208.83 | 1.09526  | YES | YES |
| 76  | a | 214.05 | 0.82602  | YES | YES |
| 77  | a | 229.85 | 10.04305 | YES | YES |
| 78  | a | 245.78 | 16.10522 | YES | YES |
| 79  | a | 263.22 | 3.19492  | YES | YES |
| 80  | a | 268.66 | 9.63079  | YES | YES |
| 81  | a | 276.90 | 1.61032  | YES | YES |
| 82  | a | 281.72 | 0.03298  | YES | YES |
| 83  | a | 282.45 | 2.93735  | YES | YES |
| 84  | a | 283.25 | 6.09176  | YES | YES |
| 85  | a | 286.51 | 0.14940  | YES | YES |
| 86  | a | 287.35 | 1.19725  | YES | YES |
| 87  | a | 290.81 | 0.07773  | YES | YES |
| 88  | a | 293.32 | 0.76885  | YES | YES |
| 89  | a | 296.21 | 0.77292  | YES | YES |
| 90  | a | 298.40 | 1.72606  | YES | YES |
| 91  | a | 304.22 | 5.60272  | YES | YES |
| 92  | a | 307.04 | 6.03489  | YES | YES |
| 93  | a | 307.44 | 6.03127  | YES | YES |
| 94  | a | 308.99 | 3.36393  | YES | YES |
| 95  | a | 309.16 | 2.68813  | YES | YES |
| 96  | a | 310.27 | 4.35365  | YES | YES |
| 97  | a | 313.58 | 1.01262  | YES | YES |
| 98  | a | 315.11 | 7.92775  | YES | YES |
| 99  | a | 320.12 | 1.90337  | YES | YES |
| 100 | a | 322.62 | 1.16995  | YES | YES |
| 101 | a | 325.45 | 3.22694  | YES | YES |
| 102 | a | 328.83 | 0.78742  | YES | YES |
| 103 | a | 330.37 | 0.47240  | YES | YES |
| 104 | a | 334.52 | 3.49635  | YES | YES |
| 105 | a | 343.84 | 0.12585  | YES | YES |
| 106 | a | 348.65 | 0.71135  | YES | YES |
| 107 | a | 358.40 | 2.23523  | YES | YES |
| 108 | a | 358.83 | 3.91132  | YES | YES |
| 109 | a | 360.37 | 2.02459  | YES | YES |
| 110 | a | 369.08 | 14.06632 | YES | YES |
| 111 | a | 379.65 | 0.66028  | YES | YES |
| 112 | a | 387.00 | 52.70123 | YES | YES |
| 113 | a | 401.74 | 0.01522  | YES | YES |
| 114 | a | 414.14 | 4.06943  | YES | YES |
| 115 | a | 415.18 | 0.02903  | YES | YES |
| 116 | a | 434.40 | 0.08509  | YES | YES |
| 117 | a | 437.17 | 0.17434  | YES | YES |
| 118 | a | 438.69 | 0.13123  | YES | YES |
| 119 | a | 440.32 | 2.73668  | YES | YES |

|     |   |        |           |     |     |
|-----|---|--------|-----------|-----|-----|
| 120 | a | 440.66 | 0.05512   | YES | YES |
| 121 | a | 441.65 | 1.36139   | YES | YES |
| 122 | a | 443.56 | 2.99641   | YES | YES |
| 123 | a | 446.24 | 0.19118   | YES | YES |
| 124 | a | 449.56 | 44.63614  | YES | YES |
| 125 | a | 451.86 | 0.10352   | YES | YES |
| 126 | a | 465.57 | 24.96508  | YES | YES |
| 127 | a | 508.58 | 5.66956   | YES | YES |
| 128 | a | 517.93 | 2.88155   | YES | YES |
| 129 | a | 518.71 | 2.21339   | YES | YES |
| 130 | a | 519.55 | 2.98318   | YES | YES |
| 131 | a | 519.68 | 4.69758   | YES | YES |
| 132 | a | 520.78 | 6.48738   | YES | YES |
| 133 | a | 521.36 | 1.16837   | YES | YES |
| 134 | a | 523.74 | 2.37177   | YES | YES |
| 135 | a | 525.82 | 0.67511   | YES | YES |
| 136 | a | 527.16 | 0.57376   | YES | YES |
| 137 | a | 537.14 | 0.59600   | YES | YES |
| 138 | a | 537.49 | 1.29116   | YES | YES |
| 139 | a | 537.74 | 1.40923   | YES | YES |
| 140 | a | 540.03 | 2.21831   | YES | YES |
| 141 | a | 541.32 | 3.97096   | YES | YES |
| 142 | a | 542.36 | 3.54236   | YES | YES |
| 143 | a | 550.02 | 0.67372   | YES | YES |
| 144 | a | 551.27 | 0.96824   | YES | YES |
| 145 | a | 552.77 | 2.78713   | YES | YES |
| 146 | a | 553.55 | 6.38179   | YES | YES |
| 147 | a | 554.91 | 1.11784   | YES | YES |
| 148 | a | 555.12 | 1.75737   | YES | YES |
| 149 | a | 555.27 | 0.29881   | YES | YES |
| 150 | a | 558.83 | 21.91362  | YES | YES |
| 151 | a | 559.68 | 24.28678  | YES | YES |
| 152 | a | 560.42 | 1.67184   | YES | YES |
| 153 | a | 560.97 | 1.76262   | YES | YES |
| 154 | a | 563.52 | 31.52126  | YES | YES |
| 155 | a | 575.43 | 0.01230   | YES | YES |
| 156 | a | 575.78 | 32.44596  | YES | YES |
| 157 | a | 579.71 | 0.21206   | YES | YES |
| 158 | a | 582.37 | 0.19540   | YES | YES |
| 159 | a | 640.42 | 188.40366 | YES | YES |
| 160 | a | 671.45 | 0.05744   | YES | YES |
| 161 | a | 672.88 | 0.06768   | YES | YES |
| 162 | a | 674.40 | 0.15279   | YES | YES |
| 163 | a | 699.89 | 23.07182  | YES | YES |
| 164 | a | 706.68 | 19.96077  | YES | YES |
| 165 | a | 707.56 | 15.30044  | YES | YES |
| 166 | a | 708.39 | 0.06519   | YES | YES |
| 167 | a | 709.33 | 15.14853  | YES | YES |
| 168 | a | 710.44 | 47.05203  | YES | YES |
| 169 | a | 710.78 | 75.18240  | YES | YES |
| 170 | a | 724.49 | 11.76431  | YES | YES |
| 171 | a | 734.83 | 1.41365   | YES | YES |
| 172 | a | 739.49 | 1.60078   | YES | YES |
| 173 | a | 743.34 | 25.16955  | YES | YES |
| 174 | a | 744.10 | 84.82083  | YES | YES |



|     |   |         |           |     |     |
|-----|---|---------|-----------|-----|-----|
| 175 | a | 746.34  | 114.44558 | YES | YES |
| 176 | a | 753.66  | 128.73226 | YES | YES |
| 177 | a | 754.77  | 122.03614 | YES | YES |
| 178 | a | 759.38  | 6.21044   | YES | YES |
| 179 | a | 788.25  | 1.31830   | YES | YES |
| 180 | a | 788.40  | 15.06429  | YES | YES |
| 181 | a | 796.74  | 3.90143   | YES | YES |
| 182 | a | 817.37  | 0.38604   | YES | YES |
| 183 | a | 819.99  | 11.45732  | YES | YES |
| 184 | a | 820.45  | 12.27321  | YES | YES |
| 185 | a | 833.89  | 1.09675   | YES | YES |
| 186 | a | 836.09  | 31.51843  | YES | YES |
| 187 | a | 836.44  | 3.39277   | YES | YES |
| 188 | a | 837.19  | 0.25171   | YES | YES |
| 189 | a | 864.45  | 29.80628  | YES | YES |
| 190 | a | 917.28  | 214.36326 | YES | YES |
| 191 | a | 925.59  | 3.98956   | YES | YES |
| 192 | a | 926.84  | 6.31241   | YES | YES |
| 193 | a | 927.90  | 3.82643   | YES | YES |
| 194 | a | 948.19  | 0.22506   | YES | YES |
| 195 | a | 950.16  | 47.76813  | YES | YES |
| 196 | a | 958.75  | 117.20000 | YES | YES |
| 197 | a | 958.83  | 0.56017   | YES | YES |
| 198 | a | 960.44  | 114.62215 | YES | YES |
| 199 | a | 966.81  | 227.63893 | YES | YES |
| 200 | a | 967.53  | 7.16162   | YES | YES |
| 201 | a | 968.76  | 235.76866 | YES | YES |
| 202 | a | 972.67  | 1.01966   | YES | YES |
| 203 | a | 972.82  | 0.21260   | YES | YES |
| 204 | a | 975.37  | 0.01665   | YES | YES |
| 205 | a | 979.27  | 10.33850  | YES | YES |
| 206 | a | 999.29  | 2.47219   | YES | YES |
| 207 | a | 1003.74 | 2.02931   | YES | YES |
| 208 | a | 1017.63 | 4.20302   | YES | YES |
| 209 | a | 1017.87 | 3.18086   | YES | YES |
| 210 | a | 1018.63 | 2.81439   | YES | YES |
| 211 | a | 1024.95 | 0.58546   | YES | YES |
| 212 | a | 1025.86 | 0.71527   | YES | YES |
| 213 | a | 1028.94 | 1.67202   | YES | YES |
| 214 | a | 1037.04 | 20.06380  | YES | YES |
| 215 | a | 1045.90 | 19.74599  | YES | YES |
| 216 | a | 1048.22 | 15.89461  | YES | YES |
| 217 | a | 1071.32 | 1.85756   | YES | YES |
| 218 | a | 1073.61 | 1.03329   | YES | YES |
| 219 | a | 1078.76 | 0.72810   | YES | YES |
| 220 | a | 1080.42 | 0.43467   | YES | YES |
| 221 | a | 1081.64 | 35.84693  | YES | YES |
| 222 | a | 1082.74 | 31.52030  | YES | YES |
| 223 | a | 1092.65 | 7.94319   | YES | YES |
| 224 | a | 1096.51 | 5.41071   | YES | YES |
| 225 | a | 1109.11 | 71.88798  | YES | YES |
| 226 | a | 1138.11 | 2.58451   | YES | YES |
| 227 | a | 1138.80 | 1.76146   | YES | YES |
| 228 | a | 1139.10 | 1.09430   | YES | YES |
| 229 | a | 1139.47 | 1.54271   | YES | YES |

|     |   |         |            |     |     |
|-----|---|---------|------------|-----|-----|
| 230 | a | 1145.27 | 5.79926    | YES | YES |
| 231 | a | 1147.54 | 2.80745    | YES | YES |
| 232 | a | 1149.88 | 23.99013   | YES | YES |
| 233 | a | 1153.93 | 39.37067   | YES | YES |
| 234 | a | 1161.07 | 14.62949   | YES | YES |
| 235 | a | 1165.20 | 43.66206   | YES | YES |
| 236 | a | 1168.07 | 9.68261    | YES | YES |
| 237 | a | 1177.28 | 101.60907  | YES | YES |
| 238 | a | 1182.46 | 13.82420   | YES | YES |
| 239 | a | 1186.86 | 17.24454   | YES | YES |
| 240 | a | 1193.30 | 41.15820   | YES | YES |
| 241 | a | 1195.54 | 30.90161   | YES | YES |
| 242 | a | 1200.40 | 85.93301   | YES | YES |
| 243 | a | 1201.25 | 108.33273  | YES | YES |
| 244 | a | 1209.04 | 98.42468   | YES | YES |
| 245 | a | 1217.97 | 13.49533   | YES | YES |
| 246 | a | 1230.89 | 434.52086  | YES | YES |
| 247 | a | 1233.00 | 345.50035  | YES | YES |
| 248 | a | 1239.07 | 393.05910  | YES | YES |
| 249 | a | 1240.52 | 244.80164  | YES | YES |
| 250 | a | 1243.11 | 562.07069  | YES | YES |
| 251 | a | 1244.14 | 686.51650  | YES | YES |
| 252 | a | 1245.79 | 4.50767    | YES | YES |
| 253 | a | 1246.21 | 115.38109  | YES | YES |
| 254 | a | 1247.88 | 256.54832  | YES | YES |
| 255 | a | 1248.55 | 122.32605  | YES | YES |
| 256 | a | 1249.59 | 16.48999   | YES | YES |
| 257 | a | 1250.59 | 201.86110  | YES | YES |
| 258 | a | 1258.92 | 1129.46542 | YES | YES |
| 259 | a | 1264.76 | 133.83925  | YES | YES |
| 260 | a | 1269.67 | 219.94936  | YES | YES |
| 261 | a | 1278.43 | 465.06492  | YES | YES |
| 262 | a | 1302.00 | 1.95106    | YES | YES |
| 263 | a | 1307.91 | 1.38593    | YES | YES |
| 264 | a | 1308.55 | 12.82914   | YES | YES |
| 265 | a | 1336.86 | 157.25406  | YES | YES |
| 266 | a | 1356.51 | 0.91472    | YES | YES |
| 267 | a | 1357.45 | 146.72527  | YES | YES |
| 268 | a | 1358.39 | 1.13829    | YES | YES |
| 269 | a | 1363.06 | 1.34494    | YES | YES |
| 270 | a | 1364.27 | 2.95653    | YES | YES |
| 271 | a | 1369.86 | 0.25718    | YES | YES |
| 272 | a | 1373.95 | 5.64846    | YES | YES |
| 273 | a | 1382.91 | 3.87737    | YES | YES |
| 274 | a | 1383.47 | 2.87861    | YES | YES |
| 275 | a | 1384.69 | 2.86483    | YES | YES |
| 276 | a | 1389.64 | 8.27716    | YES | YES |
| 277 | a | 1393.45 | 1.26647    | YES | YES |
| 278 | a | 1411.43 | 2.31262    | YES | YES |
| 279 | a | 1414.79 | 11.91450   | YES | YES |
| 280 | a | 1416.58 | 1.60949    | YES | YES |
| 281 | a | 1420.99 | 0.60454    | YES | YES |
| 282 | a | 1423.96 | 17.55833   | YES | YES |
| 283 | a | 1430.16 | 17.78264   | YES | YES |
| 284 | a | 1440.16 | 36.44064   | YES | YES |

|     |   |         |           |     |     |
|-----|---|---------|-----------|-----|-----|
| 285 | a | 1445.35 | 4.67661   | YES | YES |
| 286 | a | 1449.15 | 11.32468  | YES | YES |
| 287 | a | 1452.48 | 5.82982   | YES | YES |
| 288 | a | 1459.34 | 4.27608   | YES | YES |
| 289 | a | 1459.73 | 9.23692   | YES | YES |
| 290 | a | 1460.40 | 4.35542   | YES | YES |
| 291 | a | 1462.07 | 33.21741  | YES | YES |
| 292 | a | 1467.70 | 25.75391  | YES | YES |
| 293 | a | 1495.69 | 347.11164 | YES | YES |
| 294 | a | 1496.06 | 341.40960 | YES | YES |
| 295 | a | 1499.54 | 10.43645  | YES | YES |
| 296 | a | 1555.14 | 0.55946   | YES | YES |
| 297 | a | 1560.52 | 0.16572   | YES | YES |
| 298 | a | 1611.47 | 0.21829   | YES | YES |
| 299 | a | 1613.45 | 0.49713   | YES | YES |
| 300 | a | 1613.76 | 0.29345   | YES | YES |
| 301 | a | 1639.36 | 18.90861  | YES | YES |
| 302 | a | 1639.90 | 15.89386  | YES | YES |
| 303 | a | 1641.59 | 11.30208  | YES | YES |
| 304 | a | 2941.29 | 6.32369   | YES | YES |
| 305 | a | 2948.19 | 7.93591   | YES | YES |
| 306 | a | 2954.87 | 4.65290   | YES | YES |
| 307 | a | 2956.11 | 11.71293  | YES | YES |
| 308 | a | 2957.40 | 9.71942   | YES | YES |
| 309 | a | 2958.10 | 5.39713   | YES | YES |
| 310 | a | 3020.61 | 5.81144   | YES | YES |
| 311 | a | 3021.73 | 6.96118   | YES | YES |
| 312 | a | 3022.88 | 6.30487   | YES | YES |
| 313 | a | 3037.06 | 5.90915   | YES | YES |
| 314 | a | 3038.30 | 12.29075  | YES | YES |
| 315 | a | 3045.23 | 7.97711   | YES | YES |
| 316 | a | 3082.96 | 4.18334   | YES | YES |
| 317 | a | 3086.49 | 3.11523   | YES | YES |
| 318 | a | 3087.71 | 7.10344   | YES | YES |
| 319 | a | 3093.67 | 11.94021  | YES | YES |
| 320 | a | 3095.82 | 16.34375  | YES | YES |
| 321 | a | 3098.27 | 5.09895   | YES | YES |
| 322 | a | 3123.54 | 0.68321   | YES | YES |
| 323 | a | 3123.89 | 0.66284   | YES | YES |
| 324 | a | 3124.41 | 0.69178   | YES | YES |
| 325 | a | 3133.15 | 2.74836   | YES | YES |
| 326 | a | 3133.59 | 3.00507   | YES | YES |
| 327 | a | 3133.70 | 1.90126   | YES | YES |
| 328 | a | 3139.50 | 1.20701   | YES | YES |
| 329 | a | 3140.04 | 1.60513   | YES | YES |
| 330 | a | 3140.57 | 1.77976   | YES | YES |
| 331 | a | 3144.34 | 0.52432   | YES | YES |
| 332 | a | 3144.94 | 1.15491   | YES | YES |
| 333 | a | 3145.29 | 1.21574   | YES | YES |

Charge analysis by NBO, PABOON & QTAIM

| Atom | Charge (NBO) | Charge (PABOON) | Charge (QTAIM) |
|------|--------------|-----------------|----------------|
| 1 c  | -0.05345     | 0.0819          | -0.049199      |
| 2 c  | -0.06217     | 0.0531          | -0.065430      |
| 3 c  | -0.05609     | 0.0545          | -0.051810      |
| 4 c  | -0.06112     | 0.0466          | -0.051782      |

|      |          |         |           |
|------|----------|---------|-----------|
| 5 c  | -0.05288 | 0.0523  | -0.055702 |
| 6 c  | -0.06800 | 0.0575  | -0.058091 |
| 7 c  | -0.65150 | -0.1732 | -0.036533 |
| 8 h  | 0.24574  | 0.0398  | 0.047921  |
| 9 h  | 0.23516  | 0.0590  | 0.036768  |
| 10 h | 0.23183  | 0.0402  | 0.039284  |
| 11 c | -0.66320 | -0.1820 | -0.054848 |
| 12 h | 0.23475  | 0.0406  | 0.036139  |
| 13 h | 0.23489  | 0.0428  | 0.035337  |
| 14 h | 0.25240  | 0.0481  | 0.052366  |
| 15 c | -0.64967 | -0.1947 | -0.039341 |
| 16 h | 0.23237  | 0.0346  | 0.039326  |
| 17 h | 0.22987  | 0.0441  | 0.031021  |
| 18 h | 0.24663  | 0.0407  | 0.049837  |
| 19 c | -0.65816 | -0.1985 | -0.045608 |
| 20 h | 0.25301  | 0.0477  | 0.054920  |
| 21 h | 0.23156  | 0.0347  | 0.031698  |
| 22 h | 0.23033  | 0.0396  | 0.034925  |
| 23 c | -0.65682 | -0.1998 | -0.049053 |
| 24 h | 0.24507  | 0.0393  | 0.047922  |
| 25 h | 0.23820  | 0.0376  | 0.045250  |
| 26 h | 0.23506  | 0.0464  | 0.038189  |
| 27 c | -0.65825 | -0.1956 | -0.042766 |
| 28 h | 0.25261  | 0.0471  | 0.053828  |
| 29 h | 0.23107  | 0.0469  | 0.036309  |
| 30 h | 0.23257  | 0.0483  | 0.031523  |
| 31 c | 0.33649  | 0.2192  | 0.440499  |
| 32 c | 0.34061  | 0.2227  | 0.458537  |
| 33 c | -0.26006 | -0.0103 | 0.006949  |
| 34 h | 0.25850  | 0.0197  | 0.106348  |
| 35 c | -0.19859 | 0.0237  | -0.003926 |
| 36 h | 0.24952  | 0.0228  | 0.093556  |
| 37 c | -0.20458 | 0.0174  | -0.010855 |
| 38 h | 0.24950  | 0.0233  | 0.093075  |
| 39 c | -0.26221 | -0.0109 | 0.001293  |
| 40 h | 0.25952  | 0.0199  | 0.109843  |
| 41 f | -0.37265 | -0.2109 | -0.617630 |
| 42 f | -0.36073 | -0.1867 | -0.625334 |
| 43 c | 0.33390  | 0.2118  | 0.437359  |
| 44 c | 0.34327  | 0.2283  | 0.463777  |
| 45 c | -0.25906 | -0.0045 | 0.008511  |
| 46 h | 0.26183  | 0.0227  | 0.113353  |
| 47 c | -0.19996 | 0.0221  | -0.007723 |
| 48 h | 0.24998  | 0.0233  | 0.093817  |
| 49 c | -0.20191 | 0.0209  | -0.007714 |
| 50 h | 0.24942  | 0.0227  | 0.092357  |
| 51 c | -0.26713 | -0.0105 | 0.005190  |
| 52 h | 0.25944  | 0.0193  | 0.106717  |
| 53 f | -0.37347 | -0.2087 | -0.619504 |
| 54 f | -0.35803 | -0.1786 | -0.615669 |
| 55 c | 0.33327  | 0.2092  | 0.455660  |
| 56 c | 0.32663  | 0.2060  | 0.431876  |
| 57 c | -0.25931 | -0.0082 | 0.003177  |
| 58 h | 0.26124  | 0.0231  | 0.113983  |
| 59 c | -0.20102 | 0.0190  | -0.011552 |

|     |    |          |         |           |
|-----|----|----------|---------|-----------|
| 60  | h  | 0.25101  | 0.0255  | 0.096602  |
| 61  | c  | -0.19987 | 0.0206  | -0.011411 |
| 62  | h  | 0.25066  | 0.0250  | 0.095590  |
| 63  | c  | -0.26130 | -0.0134 | 0.000861  |
| 64  | h  | 0.25924  | 0.0210  | 0.109288  |
| 65  | f  | -0.35711 | -0.2008 | -0.621561 |
| 66  | f  | -0.37008 | -0.2168 | -0.622712 |
| 67  | sr | 1.78466  | 1.3735  | 1.722213  |
| 68  | f  | -0.75621 | -0.4189 | -0.854902 |
| 69  | al | 1.97231  | 0.4103  | 2.549710  |
| 70  | o  | -0.94369 | -0.2355 | -1.309403 |
| 71  | c  | 0.02446  | -0.0641 | 0.708254  |
| 72  | c  | 1.10382  | 0.5316  | 1.661816  |
| 73  | f  | -0.34447 | -0.1811 | -0.581491 |
| 74  | f  | -0.33628 | -0.1660 | -0.580358 |
| 75  | f  | -0.35028 | -0.1829 | -0.589636 |
| 76  | c  | 1.10819  | 0.5340  | 1.650708  |
| 77  | f  | -0.34018 | -0.1729 | -0.581153 |
| 78  | f  | -0.35774 | -0.1947 | -0.607783 |
| 79  | f  | -0.34756 | -0.1700 | -0.590177 |
| 80  | c  | 1.09913  | 0.5262  | 1.654210  |
| 81  | f  | -0.33394 | -0.1655 | -0.579914 |
| 82  | f  | -0.34256 | -0.1787 | -0.580612 |
| 83  | f  | -0.33258 | -0.1442 | -0.587311 |
| 84  | o  | -0.94928 | -0.2090 | -1.328616 |
| 85  | c  | 0.03116  | -0.0719 | 0.729000  |
| 86  | c  | 1.11173  | 0.5408  | 1.677894  |
| 87  | f  | -0.34099 | -0.1767 | -0.580422 |
| 88  | f  | -0.34416 | -0.1776 | -0.583570 |
| 89  | f  | -0.35074 | -0.1909 | -0.583614 |
| 90  | c  | 1.10295  | 0.5297  | 1.667885  |
| 91  | f  | -0.33471 | -0.1641 | -0.580621 |
| 92  | f  | -0.34404 | -0.1810 | -0.581013 |
| 93  | f  | -0.34871 | -0.1884 | -0.583148 |
| 94  | c  | 1.09872  | 0.5251  | 1.626915  |
| 95  | f  | -0.35390 | -0.1840 | -0.604631 |
| 96  | f  | -0.33746 | -0.1677 | -0.582952 |
| 97  | f  | -0.34757 | -0.1488 | -0.596063 |
| 98  | o  | -0.93784 | -0.2438 | -1.325049 |
| 99  | c  | 0.03848  | -0.0707 | 0.776800  |
| 100 | c  | 1.09939  | 0.5307  | 1.597786  |
| 101 | f  | -0.31468 | -0.1234 | -0.576940 |
| 102 | f  | -0.41014 | -0.2076 | -0.611539 |
| 103 | f  | -0.33380 | -0.1539 | -0.595854 |
| 104 | c  | 1.11288  | 0.5376  | 1.690297  |
| 105 | f  | -0.33268 | -0.1610 | -0.577810 |
| 106 | f  | -0.35278 | -0.1959 | -0.582040 |
| 107 | f  | -0.33725 | -0.1731 | -0.577686 |
| 108 | c  | 1.10160  | 0.5243  | 1.635620  |
| 109 | f  | -0.38011 | -0.1979 | -0.597603 |
| 110 | f  | -0.31949 | -0.1354 | -0.577092 |
| 111 | f  | -0.34242 | -0.1746 | -0.585136 |

[Ba(HMB)<sub>3</sub>{f-al}]<sup>+</sup> 4<sup>+</sup>

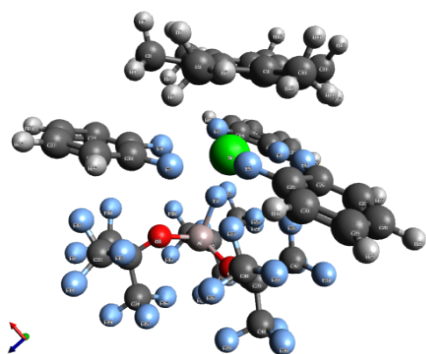

Atomic coordinates

|    |            |            |            |
|----|------------|------------|------------|
| Ba | -0.1446259 | -0.2829654 | -0.8479521 |
| Al | -0.3072122 | 0.4617063  | 2.6490765  |
| F  | -0.2901718 | 1.3268284  | 1.1296704  |
| C  | 3.6524589  | -0.0602381 | -0.4180623 |
| C  | 3.5519852  | -1.0221502 | -1.4249013 |
| C  | 4.6762756  | -1.5611293 | -2.0418469 |
| H  | 4.5550039  | -2.3231933 | -2.8266439 |
| C  | 5.9371936  | -1.0957985 | -1.6254189 |
| H  | 6.8453303  | -1.5042633 | -2.0945484 |
| C  | 6.0425363  | -0.1169548 | -0.6207194 |
| H  | 7.0342788  | 0.2405922  | -0.3040640 |
| C  | 4.8949192  | 0.4125097  | -0.0023013 |
| H  | 4.9523384  | 1.1664628  | 0.7940627  |
| F  | 2.4857149  | 0.3975894  | 0.1248370  |
| F  | 2.2882231  | -1.3987533 | -1.8021027 |
| C  | 1.7616527  | -3.3997821 | -4.0630052 |
| C  | 0.9130153  | -3.5462543 | -2.9570416 |
| C  | 1.0110749  | -4.6431887 | -2.1034031 |
| H  | 0.3317025  | -4.7261503 | -1.2437252 |
| C  | 1.9902292  | -5.6173322 | -2.3683129 |
| H  | 2.0779327  | -6.4897349 | -1.7028851 |
| C  | 2.8470022  | -5.4797563 | -3.4734286 |
| H  | 3.6096458  | -6.2462580 | -3.6805470 |
| C  | 2.7353231  | -4.3674733 | -4.3265995 |
| H  | 3.3877079  | -4.2383172 | -5.2041180 |
| F  | 1.6420337  | -2.3103658 | -4.8461363 |
| F  | -0.0072972 | -2.5572821 | -2.7090927 |
| C  | -3.8148614 | -1.0278578 | -1.7083558 |
| C  | -3.9281068 | -0.0914132 | -0.6777732 |
| C  | -5.1709668 | 0.3362872  | -0.2191241 |
| H  | -5.2264218 | 1.0663992  | 0.6002194  |
| C  | -6.3185796 | -0.2039094 | -0.8277721 |
| H  | -7.3124926 | 0.1170701  | -0.4803114 |
| C  | -6.2066547 | -1.1470601 | -1.8650343 |
| H  | -7.1125915 | -1.5636220 | -2.3313740 |
| C  | -4.9429917 | -1.5694960 | -2.3184153 |
| H  | -4.8268606 | -2.3042702 | -3.1293557 |
| F  | -2.5512135 | -1.3806287 | -2.1073079 |
| F  | -2.7688808 | 0.3888330  | -0.1378567 |
| O  | -1.5014784 | 1.0112646  | 3.7624733  |
| C  | -2.7061288 | 1.6060763  | 3.9656706  |
| C  | -2.8831132 | 2.8472928  | 3.0143405  |
| F  | -3.1849303 | 2.4247049  | 1.7501115  |

|   |            |            |            |
|---|------------|------------|------------|
| F | -3.8608213 | 3.6728952  | 3.4093376  |
| F | -1.7368921 | 3.5395070  | 2.9284834  |
| C | -2.7650160 | 2.0829458  | 5.4665136  |
| F | -2.2818880 | 1.1279307  | 6.2688183  |
| F | -2.0165312 | 3.1904060  | 5.6281155  |
| F | -4.0293459 | 2.3656689  | 5.8389579  |
| C | -3.8564830 | 0.5672726  | 3.6904355  |
| F | -3.9709729 | -0.3089106 | 4.6972321  |
| F | -5.0527726 | 1.1600306  | 3.4986182  |
| F | -3.5631945 | -0.1380902 | 2.5691853  |
| O | 1.3161616  | 0.3212012  | 3.2525982  |
| C | 2.2454959  | 1.0175486  | 3.9659836  |
| C | 2.5039734  | 2.4158521  | 3.2934628  |
| F | 1.3230882  | 2.9748349  | 2.9455691  |
| F | 3.1628241  | 3.2690164  | 4.0848484  |
| F | 3.2173495  | 2.2744838  | 2.1436026  |
| C | 3.5687376  | 0.1683186  | 3.9673872  |
| F | 3.4727603  | -0.8632174 | 4.8210155  |
| F | 3.7891674  | -0.3443397 | 2.7360434  |
| F | 4.6410841  | 0.9090057  | 4.3058722  |
| C | 1.7605043  | 1.2386078  | 5.4513426  |
| F | 1.1994456  | 0.1154645  | 5.9201001  |
| F | 2.7757295  | 1.5879485  | 6.2611277  |
| F | 0.8300705  | 2.2161079  | 5.4915361  |
| O | -0.6463906 | -1.1036970 | 1.7775507  |
| C | -0.6128800 | -2.4372666 | 2.0993497  |
| C | -1.0019503 | -2.7029857 | 3.6024382  |
| F | -2.3308734 | -2.6366725 | 3.7724967  |
| F | -0.5778141 | -3.9119107 | 4.0037727  |
| F | -0.4328504 | -1.7593843 | 4.3741484  |
| C | 0.8420568  | -2.9886060 | 1.8284247  |
| F | 1.3194500  | -2.4035584 | 0.6722117  |
| F | 1.6811201  | -2.6603922 | 2.8059490  |
| F | 0.8800500  | -4.3139654 | 1.6351894  |
| C | -1.6386201 | -3.1541794 | 1.1560856  |
| F | -1.1754302 | -3.0266796 | -0.1459598 |
| F | -1.7869950 | -4.4529957 | 1.4057008  |
| F | -2.8302286 | -2.5541971 | 1.1810536  |
| C | -1.3027617 | 2.5649828  | -2.1458086 |
| C | -1.3260908 | 1.6646842  | -3.2504719 |
| C | -0.1016662 | 1.1885955  | -3.8082446 |
| C | 1.1499277  | 1.5669342  | -3.2366269 |
| C | 1.1712436  | 2.4711990  | -2.1315506 |
| C | -0.0531323 | 2.9497583  | -1.5783643 |
| C | -2.5682594 | 3.1911745  | -1.6004644 |
| H | -2.5209060 | 4.2981121  | -1.7000563 |
| H | -2.7079684 | 2.9746622  | -0.5212257 |
| H | -3.4787491 | 2.8581934  | -2.1312400 |
| C | -2.6279963 | 1.2532474  | -3.9074971 |
| H | -2.8666303 | 1.9208427  | -4.7679614 |
| H | -3.4900846 | 1.2998348  | -3.2156042 |
| H | -2.5821140 | 0.2206382  | -4.3049355 |
| C | -0.1615256 | 0.3393496  | -5.0625847 |
| H | -0.8433266 | 0.7974061  | -5.8103355 |
| H | -0.5435968 | -0.6872126 | -4.8643222 |

|   |            |            |            |
|---|------------|------------|------------|
| H | 0.8240649  | 0.2273987  | -5.5481545 |
| C | 2.4352399  | 1.0472646  | -3.8519537 |
| H | 2.3437018  | -0.0102442 | -4.1681190 |
| H | 3.2917796  | 1.1051129  | -3.1548215 |
| H | 2.7135512  | 1.6375224  | -4.7552386 |
| C | 2.4629253  | 3.0203443  | -1.5630050 |
| H | 3.3650664  | 2.6146662  | -2.0555059 |
| H | 2.5556217  | 2.8258735  | -0.4740904 |
| H | 2.4922567  | 4.1257243  | -1.6872458 |
| C | -0.0138887 | 3.9334278  | -0.4320635 |
| H | 0.1422952  | 4.9701448  | -0.8131137 |
| H | 0.8087810  | 3.7166048  | 0.2754954  |
| H | -0.9468756 | 3.9317412  | 0.1595876  |

### Vibrational analysis

| mode | symmetry | wave number<br>cm <sup>**</sup> (-1) | IR intensity<br>km/mol | selection rules |       |
|------|----------|--------------------------------------|------------------------|-----------------|-------|
|      |          |                                      |                        | IR              | RAMAN |
| 1    |          | -0.00                                | 0.00000                | -               | -     |
| 2    |          | -0.00                                | 0.00000                | -               | -     |
| 3    |          | 0.00                                 | 0.00000                | -               | -     |
| 4    |          | 0.00                                 | 0.00000                | -               | -     |
| 5    |          | 0.00                                 | 0.00000                | -               | -     |
| 6    |          | 0.00                                 | 0.00000                | -               | -     |
| 7    | a        | 7.98                                 | 0.16081                | YES             | YES   |
| 8    | a        | 13.70                                | 0.23451                | YES             | YES   |
| 9    | a        | 17.57                                | 0.52876                | YES             | YES   |
| 10   | a        | 19.72                                | 0.59733                | YES             | YES   |
| 11   | a        | 24.05                                | 0.35150                | YES             | YES   |
| 12   | a        | 24.53                                | 0.20212                | YES             | YES   |
| 13   | a        | 25.91                                | 0.55458                | YES             | YES   |
| 14   | a        | 27.28                                | 0.01394                | YES             | YES   |
| 15   | a        | 29.08                                | 0.40142                | YES             | YES   |
| 16   | a        | 30.10                                | 0.11051                | YES             | YES   |
| 17   | a        | 33.35                                | 0.37580                | YES             | YES   |
| 18   | a        | 35.18                                | 0.09275                | YES             | YES   |
| 19   | a        | 38.43                                | 1.18254                | YES             | YES   |
| 20   | a        | 38.54                                | 0.09482                | YES             | YES   |
| 21   | a        | 39.79                                | 0.64181                | YES             | YES   |
| 22   | a        | 40.25                                | 0.77619                | YES             | YES   |
| 23   | a        | 44.39                                | 0.10748                | YES             | YES   |
| 24   | a        | 46.24                                | 0.52972                | YES             | YES   |
| 25   | a        | 46.93                                | 1.24565                | YES             | YES   |
| 26   | a        | 48.78                                | 0.38575                | YES             | YES   |
| 27   | a        | 52.46                                | 0.60795                | YES             | YES   |
| 28   | a        | 55.29                                | 0.20487                | YES             | YES   |
| 29   | a        | 58.81                                | 0.22981                | YES             | YES   |
| 30   | a        | 59.83                                | 0.53268                | YES             | YES   |
| 31   | a        | 62.27                                | 0.16538                | YES             | YES   |
| 32   | a        | 62.89                                | 0.15862                | YES             | YES   |
| 33   | a        | 65.67                                | 0.61911                | YES             | YES   |
| 34   | a        | 68.71                                | 0.14413                | YES             | YES   |
| 35   | a        | 70.61                                | 1.56108                | YES             | YES   |
| 36   | a        | 72.60                                | 0.07665                | YES             | YES   |
| 37   | a        | 74.78                                | 0.59302                | YES             | YES   |
| 38   | a        | 76.48                                | 0.67323                | YES             | YES   |



|    |   |        |          |     |     |
|----|---|--------|----------|-----|-----|
| 39 | a | 77.70  | 0.43170  | YES | YES |
| 40 | a | 78.21  | 2.12683  | YES | YES |
| 41 | a | 82.56  | 0.47750  | YES | YES |
| 42 | a | 83.14  | 0.54543  | YES | YES |
| 43 | a | 85.10  | 0.50645  | YES | YES |
| 44 | a | 87.00  | 0.68725  | YES | YES |
| 45 | a | 87.22  | 0.32983  | YES | YES |
| 46 | a | 88.46  | 1.59340  | YES | YES |
| 47 | a | 91.12  | 3.44184  | YES | YES |
| 48 | a | 95.41  | 1.72715  | YES | YES |
| 49 | a | 97.22  | 0.99066  | YES | YES |
| 50 | a | 99.66  | 6.25103  | YES | YES |
| 51 | a | 101.85 | 2.30776  | YES | YES |
| 52 | a | 103.25 | 11.39594 | YES | YES |
| 53 | a | 106.46 | 1.42224  | YES | YES |
| 54 | a | 109.86 | 10.15685 | YES | YES |
| 55 | a | 122.28 | 0.92798  | YES | YES |
| 56 | a | 123.94 | 14.02748 | YES | YES |
| 57 | a | 129.27 | 2.99714  | YES | YES |
| 58 | a | 140.17 | 2.44260  | YES | YES |
| 59 | a | 144.61 | 1.45180  | YES | YES |
| 60 | a | 154.34 | 0.49489  | YES | YES |
| 61 | a | 157.92 | 0.07215  | YES | YES |
| 62 | a | 161.53 | 1.09687  | YES | YES |
| 63 | a | 162.46 | 2.09094  | YES | YES |
| 64 | a | 162.62 | 2.18386  | YES | YES |
| 65 | a | 171.00 | 0.39906  | YES | YES |
| 66 | a | 172.09 | 1.58318  | YES | YES |
| 67 | a | 172.83 | 0.53493  | YES | YES |
| 68 | a | 177.39 | 2.24539  | YES | YES |
| 69 | a | 185.86 | 2.20245  | YES | YES |
| 70 | a | 188.46 | 0.33928  | YES | YES |
| 71 | a | 195.67 | 10.70344 | YES | YES |
| 72 | a | 196.24 | 2.04689  | YES | YES |
| 73 | a | 197.04 | 0.71623  | YES | YES |
| 74 | a | 199.43 | 0.80991  | YES | YES |
| 75 | a | 206.50 | 0.55286  | YES | YES |
| 76 | a | 213.78 | 4.32133  | YES | YES |
| 77 | a | 239.22 | 19.06585 | YES | YES |
| 78 | a | 246.59 | 2.80343  | YES | YES |
| 79 | a | 269.67 | 1.69418  | YES | YES |
| 80 | a | 274.75 | 4.99867  | YES | YES |
| 81 | a | 275.61 | 3.03319  | YES | YES |
| 82 | a | 278.73 | 7.18770  | YES | YES |
| 83 | a | 281.78 | 0.65413  | YES | YES |
| 84 | a | 284.45 | 0.53485  | YES | YES |
| 85 | a | 285.60 | 2.02906  | YES | YES |
| 86 | a | 285.75 | 0.40117  | YES | YES |
| 87 | a | 287.70 | 2.79136  | YES | YES |
| 88 | a | 289.81 | 0.23762  | YES | YES |
| 89 | a | 290.18 | 0.52389  | YES | YES |
| 90 | a | 294.34 | 0.44293  | YES | YES |
| 91 | a | 295.37 | 2.79229  | YES | YES |
| 92 | a | 297.01 | 5.23358  | YES | YES |
| 93 | a | 304.62 | 6.19552  | YES | YES |

|     |   |        |          |     |     |
|-----|---|--------|----------|-----|-----|
| 94  | a | 307.69 | 6.77923  | YES | YES |
| 95  | a | 308.95 | 4.96981  | YES | YES |
| 96  | a | 312.85 | 3.74123  | YES | YES |
| 97  | a | 315.56 | 2.50225  | YES | YES |
| 98  | a | 319.40 | 2.48630  | YES | YES |
| 99  | a | 320.93 | 2.36961  | YES | YES |
| 100 | a | 321.79 | 0.79280  | YES | YES |
| 101 | a | 325.93 | 2.82203  | YES | YES |
| 102 | a | 327.92 | 1.86727  | YES | YES |
| 103 | a | 329.90 | 0.20281  | YES | YES |
| 104 | a | 332.53 | 0.36913  | YES | YES |
| 105 | a | 349.97 | 0.60952  | YES | YES |
| 106 | a | 350.72 | 0.32443  | YES | YES |
| 107 | a | 360.21 | 6.37601  | YES | YES |
| 108 | a | 362.37 | 5.22603  | YES | YES |
| 109 | a | 364.81 | 0.72206  | YES | YES |
| 110 | a | 370.94 | 32.72850 | YES | YES |
| 111 | a | 379.00 | 1.80196  | YES | YES |
| 112 | a | 388.97 | 51.87348 | YES | YES |
| 113 | a | 403.35 | 0.05012  | YES | YES |
| 114 | a | 413.89 | 0.68765  | YES | YES |
| 115 | a | 418.29 | 0.17819  | YES | YES |
| 116 | a | 431.78 | 0.22863  | YES | YES |
| 117 | a | 436.27 | 0.05847  | YES | YES |
| 118 | a | 437.24 | 0.02337  | YES | YES |
| 119 | a | 439.90 | 0.11113  | YES | YES |
| 120 | a | 445.06 | 0.08564  | YES | YES |
| 121 | a | 445.85 | 1.96044  | YES | YES |
| 122 | a | 446.90 | 1.87413  | YES | YES |
| 123 | a | 452.47 | 0.65975  | YES | YES |
| 124 | a | 453.11 | 2.26107  | YES | YES |
| 125 | a | 455.34 | 45.69043 | YES | YES |
| 126 | a | 469.42 | 37.62080 | YES | YES |
| 127 | a | 513.02 | 6.96915  | YES | YES |
| 128 | a | 516.11 | 3.40105  | YES | YES |
| 129 | a | 518.35 | 0.42936  | YES | YES |
| 130 | a | 519.02 | 6.35386  | YES | YES |
| 131 | a | 520.51 | 3.04234  | YES | YES |
| 132 | a | 520.96 | 3.13994  | YES | YES |
| 133 | a | 521.58 | 3.12666  | YES | YES |
| 134 | a | 524.03 | 0.27207  | YES | YES |
| 135 | a | 525.01 | 2.24089  | YES | YES |
| 136 | a | 527.65 | 1.10328  | YES | YES |
| 137 | a | 535.74 | 5.63817  | YES | YES |
| 138 | a | 539.88 | 4.32423  | YES | YES |
| 139 | a | 540.54 | 0.51821  | YES | YES |
| 140 | a | 541.30 | 0.02484  | YES | YES |
| 141 | a | 542.10 | 2.73616  | YES | YES |
| 142 | a | 543.66 | 11.86969 | YES | YES |
| 143 | a | 546.84 | 0.12549  | YES | YES |
| 144 | a | 550.68 | 1.07656  | YES | YES |
| 145 | a | 553.43 | 1.02997  | YES | YES |
| 146 | a | 553.96 | 0.75004  | YES | YES |
| 147 | a | 554.08 | 0.88847  | YES | YES |
| 148 | a | 554.76 | 1.07523  | YES | YES |

|     |   |        |           |     |     |
|-----|---|--------|-----------|-----|-----|
| 149 | a | 555.40 | 0.44382   | YES | YES |
| 150 | a | 559.94 | 29.21003  | YES | YES |
| 151 | a | 560.41 | 10.25634  | YES | YES |
| 152 | a | 562.35 | 19.19537  | YES | YES |
| 153 | a | 562.93 | 7.72190   | YES | YES |
| 154 | a | 566.81 | 0.08811   | YES | YES |
| 155 | a | 570.28 | 24.22465  | YES | YES |
| 156 | a | 571.01 | 2.42628   | YES | YES |
| 157 | a | 577.00 | 0.45893   | YES | YES |
| 158 | a | 582.96 | 0.63333   | YES | YES |
| 159 | a | 667.40 | 112.36785 | YES | YES |
| 160 | a | 675.83 | 0.10346   | YES | YES |
| 161 | a | 678.13 | 0.27494   | YES | YES |
| 162 | a | 679.33 | 0.14609   | YES | YES |
| 163 | a | 698.46 | 0.04248   | YES | YES |
| 164 | a | 702.33 | 23.72319  | YES | YES |
| 165 | a | 706.25 | 19.91263  | YES | YES |
| 166 | a | 707.31 | 27.59576  | YES | YES |
| 167 | a | 709.39 | 30.18237  | YES | YES |
| 168 | a | 710.00 | 12.37207  | YES | YES |
| 169 | a | 710.57 | 62.86415  | YES | YES |
| 170 | a | 721.11 | 46.69657  | YES | YES |
| 171 | a | 737.91 | 8.74651   | YES | YES |
| 172 | a | 739.70 | 2.29673   | YES | YES |
| 173 | a | 748.39 | 55.76971  | YES | YES |
| 174 | a | 749.56 | 51.43576  | YES | YES |
| 175 | a | 749.75 | 76.97152  | YES | YES |
| 176 | a | 754.03 | 69.96373  | YES | YES |
| 177 | a | 758.14 | 138.24838 | YES | YES |
| 178 | a | 760.66 | 27.24561  | YES | YES |
| 179 | a | 776.05 | 13.38567  | YES | YES |
| 180 | a | 793.41 | 0.33061   | YES | YES |
| 181 | a | 800.81 | 2.86633   | YES | YES |
| 182 | a | 822.54 | 2.52288   | YES | YES |
| 183 | a | 822.73 | 26.27104  | YES | YES |
| 184 | a | 827.75 | 18.53600  | YES | YES |
| 185 | a | 832.56 | 38.45613  | YES | YES |
| 186 | a | 838.08 | 0.96972   | YES | YES |
| 187 | a | 844.03 | 0.39351   | YES | YES |
| 188 | a | 845.67 | 0.94576   | YES | YES |
| 189 | a | 878.33 | 28.23883  | YES | YES |
| 190 | a | 924.91 | 8.64627   | YES | YES |
| 191 | a | 932.61 | 2.12208   | YES | YES |
| 192 | a | 933.98 | 3.54249   | YES | YES |
| 193 | a | 943.64 | 111.30273 | YES | YES |
| 194 | a | 952.66 | 46.97699  | YES | YES |
| 195 | a | 954.86 | 64.80556  | YES | YES |
| 196 | a | 955.62 | 0.69615   | YES | YES |
| 197 | a | 959.86 | 211.48661 | YES | YES |
| 198 | a | 961.36 | 413.67021 | YES | YES |
| 199 | a | 964.40 | 1.94523   | YES | YES |
| 200 | a | 967.10 | 176.16813 | YES | YES |
| 201 | a | 969.63 | 0.36357   | YES | YES |
| 202 | a | 975.49 | 3.58434   | YES | YES |
| 203 | a | 976.85 | 0.91266   | YES | YES |

|     |   |         |           |     |     |
|-----|---|---------|-----------|-----|-----|
| 204 | a | 977.02  | 1.26137   | YES | YES |
| 205 | a | 982.40  | 12.69309  | YES | YES |
| 206 | a | 1003.32 | 3.48134   | YES | YES |
| 207 | a | 1007.23 | 0.84616   | YES | YES |
| 208 | a | 1019.65 | 14.66506  | YES | YES |
| 209 | a | 1019.76 | 3.15066   | YES | YES |
| 210 | a | 1023.32 | 6.82037   | YES | YES |
| 211 | a | 1027.93 | 2.25712   | YES | YES |
| 212 | a | 1028.72 | 2.41544   | YES | YES |
| 213 | a | 1032.71 | 1.39208   | YES | YES |
| 214 | a | 1051.17 | 11.19762  | YES | YES |
| 215 | a | 1053.51 | 17.01179  | YES | YES |
| 216 | a | 1053.84 | 14.38381  | YES | YES |
| 217 | a | 1074.50 | 0.04284   | YES | YES |
| 218 | a | 1075.18 | 0.48762   | YES | YES |
| 219 | a | 1081.51 | 10.82801  | YES | YES |
| 220 | a | 1083.52 | 20.53434  | YES | YES |
| 221 | a | 1084.62 | 9.13006   | YES | YES |
| 222 | a | 1087.50 | 6.14450   | YES | YES |
| 223 | a | 1088.31 | 18.97816  | YES | YES |
| 224 | a | 1090.53 | 15.75031  | YES | YES |
| 225 | a | 1112.75 | 117.62575 | YES | YES |
| 226 | a | 1136.16 | 29.10389  | YES | YES |
| 227 | a | 1137.41 | 2.39221   | YES | YES |
| 228 | a | 1138.69 | 0.92705   | YES | YES |
| 229 | a | 1139.73 | 8.42759   | YES | YES |
| 230 | a | 1147.49 | 101.55791 | YES | YES |
| 231 | a | 1153.73 | 19.41109  | YES | YES |
| 232 | a | 1154.63 | 8.00661   | YES | YES |
| 233 | a | 1166.65 | 27.45516  | YES | YES |
| 234 | a | 1168.19 | 14.49273  | YES | YES |
| 235 | a | 1171.77 | 27.61013  | YES | YES |
| 236 | a | 1175.54 | 8.90697   | YES | YES |
| 237 | a | 1180.11 | 25.75455  | YES | YES |
| 238 | a | 1185.08 | 124.88723 | YES | YES |
| 239 | a | 1188.63 | 37.03798  | YES | YES |
| 240 | a | 1191.04 | 46.79252  | YES | YES |
| 241 | a | 1196.65 | 34.77675  | YES | YES |
| 242 | a | 1202.67 | 38.43262  | YES | YES |
| 243 | a | 1209.23 | 22.36709  | YES | YES |
| 244 | a | 1211.71 | 248.83546 | YES | YES |
| 245 | a | 1213.74 | 7.40026   | YES | YES |
| 246 | a | 1220.85 | 329.27529 | YES | YES |
| 247 | a | 1228.84 | 240.56655 | YES | YES |
| 248 | a | 1237.70 | 812.06546 | YES | YES |
| 249 | a | 1242.48 | 573.08461 | YES | YES |
| 250 | a | 1242.72 | 64.45501  | YES | YES |
| 251 | a | 1246.68 | 218.35657 | YES | YES |
| 252 | a | 1247.45 | 25.54038  | YES | YES |
| 253 | a | 1249.75 | 4.49994   | YES | YES |
| 254 | a | 1250.82 | 84.67159  | YES | YES |
| 255 | a | 1251.47 | 141.26071 | YES | YES |
| 256 | a | 1256.85 | 891.41356 | YES | YES |
| 257 | a | 1259.23 | 485.21167 | YES | YES |
| 258 | a | 1264.34 | 142.39117 | YES | YES |

|     |   |         |            |     |     |
|-----|---|---------|------------|-----|-----|
| 259 | a | 1267.19 | 1063.74324 | YES | YES |
| 260 | a | 1267.94 | 338.89604  | YES | YES |
| 261 | a | 1280.29 | 107.02854  | YES | YES |
| 262 | a | 1300.84 | 5.85606    | YES | YES |
| 263 | a | 1302.55 | 28.17576   | YES | YES |
| 264 | a | 1313.12 | 1.07768    | YES | YES |
| 265 | a | 1328.26 | 79.17698   | YES | YES |
| 266 | a | 1347.01 | 133.94919  | YES | YES |
| 267 | a | 1358.93 | 0.24608    | YES | YES |
| 268 | a | 1364.41 | 0.06174    | YES | YES |
| 269 | a | 1364.85 | 3.14539    | YES | YES |
| 270 | a | 1370.14 | 4.47039    | YES | YES |
| 271 | a | 1373.24 | 9.87681    | YES | YES |
| 272 | a | 1376.38 | 0.53779    | YES | YES |
| 273 | a | 1377.85 | 7.54958    | YES | YES |
| 274 | a | 1381.27 | 2.89365    | YES | YES |
| 275 | a | 1381.91 | 1.97414    | YES | YES |
| 276 | a | 1387.86 | 0.80473    | YES | YES |
| 277 | a | 1393.64 | 7.83164    | YES | YES |
| 278 | a | 1408.75 | 2.67108    | YES | YES |
| 279 | a | 1414.35 | 3.37846    | YES | YES |
| 280 | a | 1416.48 | 13.46148   | YES | YES |
| 281 | a | 1426.47 | 38.20601   | YES | YES |
| 282 | a | 1428.00 | 4.03916    | YES | YES |
| 283 | a | 1433.38 | 3.25371    | YES | YES |
| 284 | a | 1443.33 | 32.78781   | YES | YES |
| 285 | a | 1447.18 | 7.46997    | YES | YES |
| 286 | a | 1450.07 | 32.56507   | YES | YES |
| 287 | a | 1455.26 | 16.76276   | YES | YES |
| 288 | a | 1456.44 | 14.28681   | YES | YES |
| 289 | a | 1458.86 | 5.56405    | YES | YES |
| 290 | a | 1459.10 | 10.23896   | YES | YES |
| 291 | a | 1467.85 | 36.51015   | YES | YES |
| 292 | a | 1475.05 | 13.67213   | YES | YES |
| 293 | a | 1497.43 | 456.48471  | YES | YES |
| 294 | a | 1498.90 | 3.99795    | YES | YES |
| 295 | a | 1504.88 | 214.52756  | YES | YES |
| 296 | a | 1554.87 | 0.02123    | YES | YES |
| 297 | a | 1560.01 | 0.08045    | YES | YES |
| 298 | a | 1611.49 | 5.86270    | YES | YES |
| 299 | a | 1611.69 | 0.34284    | YES | YES |
| 300 | a | 1612.96 | 0.37850    | YES | YES |
| 301 | a | 1630.20 | 21.08955   | YES | YES |
| 302 | a | 1635.84 | 17.34681   | YES | YES |
| 303 | a | 1637.95 | 11.19956   | YES | YES |
| 304 | a | 2944.83 | 6.54795    | YES | YES |
| 305 | a | 2948.30 | 7.34160    | YES | YES |
| 306 | a | 2953.01 | 5.30466    | YES | YES |
| 307 | a | 2956.62 | 5.94944    | YES | YES |
| 308 | a | 2960.62 | 6.03125    | YES | YES |
| 309 | a | 2965.42 | 5.49124    | YES | YES |
| 310 | a | 3024.60 | 7.30358    | YES | YES |
| 311 | a | 3030.26 | 1.81421    | YES | YES |
| 312 | a | 3040.13 | 3.57152    | YES | YES |
| 313 | a | 3041.15 | 5.25830    | YES | YES |

|     |   |         |          |     |     |
|-----|---|---------|----------|-----|-----|
| 314 | a | 3043.80 | 2.65265  | YES | YES |
| 315 | a | 3055.95 | 2.38455  | YES | YES |
| 316 | a | 3078.09 | 3.55768  | YES | YES |
| 317 | a | 3080.70 | 2.27313  | YES | YES |
| 318 | a | 3091.02 | 19.29973 | YES | YES |
| 319 | a | 3091.95 | 11.09775 | YES | YES |
| 320 | a | 3098.93 | 3.96566  | YES | YES |
| 321 | a | 3101.20 | 0.91836  | YES | YES |
| 322 | a | 3119.11 | 1.09233  | YES | YES |
| 323 | a | 3121.45 | 1.25136  | YES | YES |
| 324 | a | 3122.81 | 0.95561  | YES | YES |
| 325 | a | 3128.80 | 1.85759  | YES | YES |
| 326 | a | 3130.08 | 0.56003  | YES | YES |
| 327 | a | 3132.99 | 1.91704  | YES | YES |
| 328 | a | 3136.63 | 0.42078  | YES | YES |
| 329 | a | 3138.30 | 1.04541  | YES | YES |
| 330 | a | 3140.25 | 0.56821  | YES | YES |
| 331 | a | 3154.01 | 0.75073  | YES | YES |
| 332 | a | 3156.54 | 4.38266  | YES | YES |
| 333 | a | 3164.58 | 5.35101  | YES | YES |

Charge analysis by NBO, PABOON & QTAIM

| Atom | Charge (NBO) | Charge (PABOON) | Charge (QTAIM) |
|------|--------------|-----------------|----------------|
| 1 ba | 1.78931      | 0.8230          | 1.696827       |
| 2 al | 1.96132      | 0.3813          | 2.543947       |
| 3 f  | -0.73378     | -0.3486         | -0.863149      |
| 4 c  | 0.34008      | 0.2171          | 0.461406       |
| 5 c  | 0.33334      | 0.2124          | 0.435416       |
| 6 c  | -0.26650     | -0.0247         | -0.009359      |
| 7 h  | 0.25390      | 0.0177          | 0.103787       |
| 8 c  | -0.20635     | 0.0131          | -0.018238      |
| 9 h  | 0.24733      | 0.0184          | 0.089127       |
| 10 c | -0.20534     | 0.0117          | -0.018081      |
| 11 h | 0.24909      | 0.0210          | 0.092349       |
| 12 c | -0.25788     | -0.0187         | 0.000510       |
| 13 h | 0.26573      | 0.0319          | 0.133700       |
| 14 f | -0.34841     | -0.1672         | -0.616567      |
| 15 f | -0.36623     | -0.2041         | -0.633231      |
| 16 c | 0.35534      | 0.2417          | 0.520072       |
| 17 c | 0.33574      | 0.2158          | 0.444084       |
| 18 c | -0.27252     | -0.0435         | -0.014148      |
| 19 h | 0.24930      | 0.0268          | 0.105019       |
| 20 c | -0.21306     | 0.0097          | -0.021135      |
| 21 h | 0.24566      | 0.0161          | 0.085178       |
| 22 c | -0.21127     | 0.0101          | -0.023157      |
| 23 h | 0.24607      | 0.0164          | 0.086280       |
| 24 c | -0.28268     | -0.0496         | -0.028908      |
| 25 h | 0.25450      | 0.0181          | 0.099894       |
| 26 f | -0.31761     | -0.1698         | -0.601178      |
| 27 f | -0.36759     | -0.2143         | -0.619334      |
| 28 c | 0.33313      | 0.2096          | 0.442390       |
| 29 c | 0.33638      | 0.2123          | 0.455922       |
| 30 c | -0.25964     | -0.0202         | -0.003498      |
| 31 h | 0.26303      | 0.0296          | 0.129367       |
| 32 c | -0.20507     | 0.0116          | -0.017536      |
| 33 h | 0.24923      | 0.0214          | 0.092834       |

|      |          |         |           |
|------|----------|---------|-----------|
| 34 c | -0.20612 | 0.0127  | -0.018405 |
| 35 h | 0.24833  | 0.0201  | 0.091613  |
| 36 c | -0.26731 | -0.0218 | -0.009414 |
| 37 h | 0.25696  | 0.0175  | 0.105779  |
| 38 f | -0.36003 | -0.1926 | -0.618487 |
| 39 f | -0.35403 | -0.1383 | -0.619601 |
| 40 o | -0.95479 | -0.2215 | -1.339479 |
| 41 c | 0.03366  | -0.0702 | 0.728281  |
| 42 c | 1.10086  | 0.5168  | 1.639064  |
| 43 f | -0.36474 | -0.1963 | -0.592913 |
| 44 f | -0.33419 | -0.1656 | -0.580029 |
| 45 f | -0.33213 | -0.1543 | -0.583072 |
| 46 c | 1.11269  | 0.5352  | 1.691166  |
| 47 f | -0.33367 | -0.1655 | -0.578589 |
| 48 f | -0.34361 | -0.1842 | -0.579244 |
| 49 f | -0.34740 | -0.1892 | -0.580760 |
| 50 c | 1.10230  | 0.5249  | 1.648206  |
| 51 f | -0.33452 | -0.1675 | -0.579147 |
| 52 f | -0.34719 | -0.1846 | -0.583808 |
| 53 f | -0.35258 | -0.1685 | -0.593932 |
| 54 o | -0.95359 | -0.2054 | -1.325519 |
| 55 c | 0.02873  | -0.0726 | 0.718881  |
| 56 c | 1.10240  | 0.5218  | 1.634449  |
| 57 f | -0.33572 | -0.1506 | -0.586071 |
| 58 f | -0.33171 | -0.1608 | -0.579662 |
| 59 f | -0.36294 | -0.1994 | -0.592606 |
| 60 c | 1.11122  | 0.5350  | 1.665521  |
| 61 f | -0.33898 | -0.1753 | -0.579334 |
| 62 f | -0.35432 | -0.1843 | -0.593445 |
| 63 f | -0.34574 | -0.1846 | -0.582440 |
| 64 c | 1.10397  | 0.5275  | 1.675483  |
| 65 f | -0.33458 | -0.1665 | -0.579846 |
| 66 f | -0.34136 | -0.1801 | -0.579652 |
| 67 f | -0.34309 | -0.1825 | -0.581306 |
| 68 o | -0.98551 | -0.2780 | -1.304572 |
| 69 c | 0.01945  | -0.0356 | 0.694817  |
| 70 c | 1.10916  | 0.5388  | 1.689650  |
| 71 f | -0.33285 | -0.1638 | -0.575291 |
| 72 f | -0.33538 | -0.1716 | -0.575632 |
| 73 f | -0.32014 | -0.1233 | -0.579706 |
| 74 c | 1.10654  | 0.5446  | 1.641383  |
| 75 f | -0.39006 | -0.1884 | -0.597821 |
| 76 f | -0.31487 | -0.1174 | -0.574952 |
| 77 f | -0.33301 | -0.1579 | -0.580607 |
| 78 c | 1.10458  | 0.5370  | 1.633880  |
| 79 f | -0.39433 | -0.2133 | -0.595607 |
| 80 f | -0.32233 | -0.1424 | -0.577927 |
| 81 f | -0.32381 | -0.1148 | -0.580725 |
| 82 c | -0.05644 | 0.1445  | -0.054375 |
| 83 c | -0.07384 | 0.1141  | -0.069587 |
| 84 c | -0.06629 | 0.1168  | -0.066220 |
| 85 c | -0.07933 | 0.1006  | -0.069898 |
| 86 c | -0.06408 | 0.1147  | -0.062676 |
| 87 c | -0.04353 | 0.1264  | -0.046637 |
| 88 c | -0.66141 | -0.1860 | -0.050878 |

|     |   |          |         |           |
|-----|---|----------|---------|-----------|
| 89  | h | 0.24949  | 0.0428  | 0.050669  |
| 90  | h | 0.24601  | 0.0754  | 0.067909  |
| 91  | h | 0.23052  | 0.0368  | 0.033953  |
| 92  | c | -0.65865 | -0.1759 | -0.047398 |
| 93  | h | 0.25156  | 0.0480  | 0.054284  |
| 94  | h | 0.22975  | 0.0475  | 0.032674  |
| 95  | h | 0.23505  | 0.0349  | 0.037162  |
| 96  | c | -0.65796 | -0.1870 | -0.044948 |
| 97  | h | 0.24347  | 0.0381  | 0.045505  |
| 98  | h | 0.23715  | 0.0574  | 0.040497  |
| 99  | h | 0.24145  | 0.0389  | 0.050662  |
| 100 | c | -0.66256 | -0.2064 | -0.052182 |
| 101 | h | 0.23693  | 0.0541  | 0.049890  |
| 102 | h | 0.22768  | 0.0442  | 0.031269  |
| 103 | h | 0.25127  | 0.0457  | 0.052857  |
| 104 | c | -0.65915 | -0.1896 | -0.050362 |
| 105 | h | 0.23092  | 0.0365  | 0.034558  |
| 106 | h | 0.24115  | 0.0560  | 0.056585  |
| 107 | h | 0.25021  | 0.0412  | 0.052385  |
| 108 | c | -0.65673 | -0.1771 | -0.042730 |
| 109 | h | 0.24413  | 0.0420  | 0.044657  |
| 110 | h | 0.24261  | 0.0482  | 0.056594  |
| 111 | h | 0.24187  | 0.0482  | 0.056623  |

[Ca(HMB)oDFB<sub>4</sub>]<sup>2+</sup> 7<sup>2+</sup>

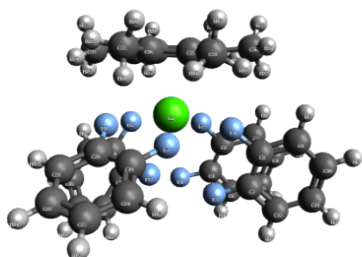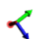

Atomic coordinates

|    |          |          |          |
|----|----------|----------|----------|
| Ca | -0.13925 | -0.02584 | -0.38951 |
| C  | 2.35461  | 1.18525  | 2.72790  |
| C  | 1.48154  | 2.02993  | 2.03529  |
| C  | 0.97760  | 3.20663  | 2.57684  |
| H  | 0.29559  | 3.83938  | 1.98969  |
| C  | 1.36558  | 3.54493  | 3.88508  |
| H  | 0.98597  | 4.47241  | 4.33946  |
| C  | 2.23871  | 2.70767  | 4.60244  |
| H  | 2.54498  | 2.98021  | 5.62413  |
| C  | 2.73783  | 1.52467  | 4.02901  |
| H  | 3.42935  | 0.86206  | 4.57217  |
| F  | 2.78790  | 0.05825  | 2.13316  |
| F  | 1.08538  | 1.63738  | 0.75411  |
| C  | -1.02976 | 0.57665  | 3.07852  |
| C  | -1.87656 | 1.37921  | 2.31410  |
| C  | -2.62870 | 2.40490  | 2.87396  |
| H  | -3.29456 | 3.01720  | 2.24745  |
| C  | -2.50454 | 2.61452  | 4.26169  |



|   |          |          |          |
|---|----------|----------|----------|
| H | -3.09033 | 3.41526  | 4.73856  |
| C | -1.65076 | 1.80991  | 5.03736  |
| H | -1.56793 | 1.98491  | 6.12094  |
| C | -0.90014 | 0.77408  | 4.44973  |
| H | -0.22368 | 0.13486  | 5.03624  |
| F | -0.31563 | -0.37615 | 2.40639  |
| F | -1.90292 | 1.11996  | 0.95272  |
| C | 2.15302  | -2.47489 | 0.52681  |
| C | 2.83736  | -1.71872 | -0.42398 |
| C | 4.08586  | -2.09435 | -0.90277 |
| H | 4.60651  | -1.47603 | -1.64949 |
| C | 4.64672  | -3.28098 | -0.38982 |
| H | 5.63669  | -3.60435 | -0.74617 |
| C | 3.95855  | -4.04811 | 0.56703  |
| H | 4.41138  | -4.97178 | 0.95878  |
| C | 2.69264  | -3.64921 | 1.03974  |
| H | 2.13762  | -4.22981 | 1.79203  |
| F | 0.92489  | -2.00237 | 0.92754  |
| F | 2.19933  | -0.57470 | -0.88010 |
| C | -1.94041 | -2.90441 | -0.25309 |
| C | -0.90470 | -3.31811 | -1.09204 |
| C | -0.77311 | -4.64769 | -1.47700 |
| H | 0.05064  | -4.95232 | -2.14016 |
| C | -1.72573 | -5.56558 | -0.99243 |
| H | -1.64787 | -6.62420 | -1.28393 |
| C | -2.76967 | -5.14506 | -0.14896 |
| H | -3.50709 | -5.87453 | 0.21943  |
| C | -2.88857 | -3.79473 | 0.23570  |
| H | -3.69509 | -3.44195 | 0.89619  |
| F | -1.97520 | -1.55587 | 0.07407  |
| F | -0.02765 | -2.34767 | -1.52320 |
| C | -2.02775 | 1.02004  | -2.16764 |
| C | -1.32912 | 0.04286  | -2.94558 |
| C | 0.06982  | 0.19207  | -3.19819 |
| C | 0.75064  | 1.35446  | -2.71953 |
| C | 0.04213  | 2.34869  | -1.98381 |
| C | -1.35229 | 2.19762  | -1.72835 |
| C | -3.50272 | 0.82409  | -1.89123 |
| H | -4.12067 | 1.28336  | -2.69696 |
| H | -3.81575 | 1.28464  | -0.93496 |
| H | -3.78019 | -0.24619 | -1.84474 |
| C | -2.13112 | -1.09318 | -3.54434 |
| H | -2.99618 | -0.68774 | -4.11192 |
| H | -2.55590 | -1.77621 | -2.77587 |
| H | -1.54624 | -1.71023 | -4.24844 |
| C | 0.84112  | -0.83059 | -4.00545 |
| H | 1.04386  | -0.44954 | -5.03176 |
| H | 0.30406  | -1.78920 | -4.11093 |
| H | 1.82280  | -1.05840 | -3.54333 |
| C | 2.20366  | 1.60853  | -3.05392 |
| H | 2.64734  | 0.82113  | -3.68806 |
| H | 2.83253  | 1.70219  | -2.14205 |
| H | 2.30384  | 2.56824  | -3.60671 |
| C | 0.75868  | 3.61022  | -1.56410 |
| H | 1.81410  | 3.42377  | -1.28585 |

|   |          |         |          |
|---|----------|---------|----------|
| H | 0.26888  | 4.11665 | -0.71138 |
| H | 0.77336  | 4.33974 | -2.40721 |
| C | -2.09762 | 3.33820 | -1.07209 |
| H | -1.97885 | 4.26283 | -1.67841 |
| H | -1.70685 | 3.57203 | -0.05798 |
| H | -3.18198 | 3.14912 | -0.98080 |

Vibrational analysis

| mode | symmetry | wave number<br>cm <sup>**</sup> (-1) | IR intensity<br>km/mol | selection rules |       |
|------|----------|--------------------------------------|------------------------|-----------------|-------|
|      |          |                                      |                        | IR              | RAMAN |
| 1    |          | -0.00                                | 0.00000                | -               | -     |
| 2    |          | -0.00                                | 0.00000                | -               | -     |
| 3    |          | -0.00                                | 0.00000                | -               | -     |
| 4    |          | -0.00                                | 0.00000                | -               | -     |
| 5    |          | 0.00                                 | 0.00000                | -               | -     |
| 6    |          | 0.00                                 | 0.00000                | -               | -     |
| 7    | a        | 10.65                                | 1.35236                | YES             | YES   |
| 8    | a        | 15.48                                | 0.12709                | YES             | YES   |
| 9    | a        | 16.89                                | 0.16342                | YES             | YES   |
| 10   | a        | 19.43                                | 0.61751                | YES             | YES   |
| 11   | a        | 29.03                                | 1.85030                | YES             | YES   |
| 12   | a        | 32.10                                | 1.15689                | YES             | YES   |
| 13   | a        | 35.58                                | 0.62228                | YES             | YES   |
| 14   | a        | 37.51                                | 1.02905                | YES             | YES   |
| 15   | a        | 43.74                                | 0.90199                | YES             | YES   |
| 16   | a        | 50.61                                | 0.28932                | YES             | YES   |
| 17   | a        | 54.02                                | 0.90872                | YES             | YES   |
| 18   | a        | 58.06                                | 0.24434                | YES             | YES   |
| 19   | a        | 61.92                                | 0.08986                | YES             | YES   |
| 20   | a        | 63.75                                | 0.47496                | YES             | YES   |
| 21   | a        | 69.45                                | 0.75560                | YES             | YES   |
| 22   | a        | 71.32                                | 0.29441                | YES             | YES   |
| 23   | a        | 79.47                                | 0.43573                | YES             | YES   |
| 24   | a        | 84.16                                | 0.10826                | YES             | YES   |
| 25   | a        | 85.60                                | 1.09671                | YES             | YES   |
| 26   | a        | 92.92                                | 1.09496                | YES             | YES   |
| 27   | a        | 96.45                                | 3.68983                | YES             | YES   |
| 28   | a        | 99.24                                | 1.55207                | YES             | YES   |
| 29   | a        | 102.86                               | 0.92391                | YES             | YES   |
| 30   | a        | 111.04                               | 1.24561                | YES             | YES   |
| 31   | a        | 115.11                               | 3.64436                | YES             | YES   |
| 32   | a        | 116.34                               | 1.44472                | YES             | YES   |
| 33   | a        | 122.84                               | 0.09879                | YES             | YES   |
| 34   | a        | 132.17                               | 0.84132                | YES             | YES   |
| 35   | a        | 134.74                               | 1.66972                | YES             | YES   |
| 36   | a        | 159.99                               | 1.12662                | YES             | YES   |
| 37   | a        | 170.03                               | 1.70624                | YES             | YES   |
| 38   | a        | 181.87                               | 35.85961               | YES             | YES   |
| 39   | a        | 189.58                               | 37.83398               | YES             | YES   |
| 40   | a        | 194.11                               | 3.22649                | YES             | YES   |
| 41   | a        | 195.98                               | 11.10351               | YES             | YES   |
| 42   | a        | 202.64                               | 4.14458                | YES             | YES   |
| 43   | a        | 203.51                               | 8.20232                | YES             | YES   |
| 44   | a        | 209.67                               | 7.38488                | YES             | YES   |
| 45   | a        | 222.36                               | 1.48813                | YES             | YES   |

|     |   |        |           |     |     |
|-----|---|--------|-----------|-----|-----|
| 46  | a | 231.57 | 47.85143  | YES | YES |
| 47  | a | 265.15 | 58.27036  | YES | YES |
| 48  | a | 279.64 | 1.54628   | YES | YES |
| 49  | a | 286.25 | 1.51463   | YES | YES |
| 50  | a | 289.62 | 0.95311   | YES | YES |
| 51  | a | 291.26 | 2.31992   | YES | YES |
| 52  | a | 299.81 | 0.22543   | YES | YES |
| 53  | a | 310.88 | 7.79232   | YES | YES |
| 54  | a | 312.78 | 5.97548   | YES | YES |
| 55  | a | 320.15 | 3.61325   | YES | YES |
| 56  | a | 332.69 | 0.91203   | YES | YES |
| 57  | a | 346.44 | 0.52053   | YES | YES |
| 58  | a | 378.73 | 1.97708   | YES | YES |
| 59  | a | 388.42 | 1.79586   | YES | YES |
| 60  | a | 397.15 | 0.01668   | YES | YES |
| 61  | a | 408.74 | 0.01715   | YES | YES |
| 62  | a | 430.92 | 1.02297   | YES | YES |
| 63  | a | 434.65 | 0.42284   | YES | YES |
| 64  | a | 435.34 | 2.13000   | YES | YES |
| 65  | a | 437.02 | 1.25354   | YES | YES |
| 66  | a | 437.63 | 2.55999   | YES | YES |
| 67  | a | 438.38 | 0.52895   | YES | YES |
| 68  | a | 440.14 | 4.15050   | YES | YES |
| 69  | a | 440.57 | 0.96279   | YES | YES |
| 70  | a | 441.99 | 0.19478   | YES | YES |
| 71  | a | 445.90 | 1.48475   | YES | YES |
| 72  | a | 447.67 | 0.00671   | YES | YES |
| 73  | a | 531.96 | 2.67521   | YES | YES |
| 74  | a | 533.79 | 0.30314   | YES | YES |
| 75  | a | 534.58 | 3.90554   | YES | YES |
| 76  | a | 536.47 | 0.30500   | YES | YES |
| 77  | a | 539.11 | 1.41176   | YES | YES |
| 78  | a | 539.20 | 6.24785   | YES | YES |
| 79  | a | 540.28 | 1.47411   | YES | YES |
| 80  | a | 542.76 | 6.64776   | YES | YES |
| 81  | a | 551.53 | 3.49009   | YES | YES |
| 82  | a | 554.79 | 34.32765  | YES | YES |
| 83  | a | 555.66 | 18.71400  | YES | YES |
| 84  | a | 557.62 | 12.21956  | YES | YES |
| 85  | a | 562.08 | 21.70183  | YES | YES |
| 86  | a | 563.81 | 0.56238   | YES | YES |
| 87  | a | 571.57 | 0.77456   | YES | YES |
| 88  | a | 575.58 | 0.69528   | YES | YES |
| 89  | a | 581.65 | 0.56724   | YES | YES |
| 90  | a | 668.67 | 0.08061   | YES | YES |
| 91  | a | 673.06 | 0.14030   | YES | YES |
| 92  | a | 673.28 | 0.17694   | YES | YES |
| 93  | a | 675.06 | 0.00421   | YES | YES |
| 94  | a | 685.33 | 0.16084   | YES | YES |
| 95  | a | 744.17 | 57.12358  | YES | YES |
| 96  | a | 745.50 | 110.58587 | YES | YES |
| 97  | a | 747.20 | 52.81872  | YES | YES |
| 98  | a | 749.34 | 126.06024 | YES | YES |
| 99  | a | 749.73 | 78.62067  | YES | YES |
| 100 | a | 750.44 | 31.07005  | YES | YES |

|     |   |         |           |     |     |
|-----|---|---------|-----------|-----|-----|
| 101 | a | 751.17  | 114.00948 | YES | YES |
| 102 | a | 757.61  | 88.22783  | YES | YES |
| 103 | a | 792.34  | 1.36310   | YES | YES |
| 104 | a | 799.05  | 2.77655   | YES | YES |
| 105 | a | 811.98  | 3.94141   | YES | YES |
| 106 | a | 812.82  | 17.75426  | YES | YES |
| 107 | a | 817.63  | 12.99228  | YES | YES |
| 108 | a | 823.54  | 20.84866  | YES | YES |
| 109 | a | 834.07  | 1.93765   | YES | YES |
| 110 | a | 839.40  | 0.31952   | YES | YES |
| 111 | a | 840.45  | 0.07506   | YES | YES |
| 112 | a | 842.41  | 0.04721   | YES | YES |
| 113 | a | 928.00  | 3.46983   | YES | YES |
| 114 | a | 931.29  | 0.74652   | YES | YES |
| 115 | a | 933.21  | 1.77922   | YES | YES |
| 116 | a | 935.37  | 1.31542   | YES | YES |
| 117 | a | 952.58  | 2.53743   | YES | YES |
| 118 | a | 959.51  | 0.43971   | YES | YES |
| 119 | a | 974.68  | 4.62951   | YES | YES |
| 120 | a | 975.11  | 13.29653  | YES | YES |
| 121 | a | 978.89  | 0.07757   | YES | YES |
| 122 | a | 981.97  | 0.07424   | YES | YES |
| 123 | a | 983.63  | 0.00151   | YES | YES |
| 124 | a | 985.75  | 0.00558   | YES | YES |
| 125 | a | 997.78  | 4.05972   | YES | YES |
| 126 | a | 999.85  | 2.15784   | YES | YES |
| 127 | a | 1014.13 | 4.72076   | YES | YES |
| 128 | a | 1014.39 | 4.04759   | YES | YES |
| 129 | a | 1014.63 | 2.43682   | YES | YES |
| 130 | a | 1017.72 | 1.07099   | YES | YES |
| 131 | a | 1020.55 | 4.63773   | YES | YES |
| 132 | a | 1023.58 | 1.41500   | YES | YES |
| 133 | a | 1024.78 | 1.78114   | YES | YES |
| 134 | a | 1049.46 | 23.20415  | YES | YES |
| 135 | a | 1051.78 | 9.80174   | YES | YES |
| 136 | a | 1071.98 | 22.36087  | YES | YES |
| 137 | a | 1073.94 | 31.64945  | YES | YES |
| 138 | a | 1074.82 | 1.29712   | YES | YES |
| 139 | a | 1075.37 | 6.86877   | YES | YES |
| 140 | a | 1078.13 | 4.16075   | YES | YES |
| 141 | a | 1080.64 | 81.86619  | YES | YES |
| 142 | a | 1081.83 | 3.75802   | YES | YES |
| 143 | a | 1129.39 | 12.79001  | YES | YES |
| 144 | a | 1130.84 | 3.22341   | YES | YES |
| 145 | a | 1132.98 | 5.29240   | YES | YES |
| 146 | a | 1139.43 | 37.40321  | YES | YES |
| 147 | a | 1141.54 | 4.89007   | YES | YES |
| 148 | a | 1141.76 | 6.61063   | YES | YES |
| 149 | a | 1142.04 | 2.48635   | YES | YES |
| 150 | a | 1142.82 | 31.62976  | YES | YES |
| 151 | a | 1229.29 | 114.60143 | YES | YES |
| 152 | a | 1233.76 | 83.38439  | YES | YES |
| 153 | a | 1235.85 | 135.89557 | YES | YES |
| 154 | a | 1240.24 | 33.18213  | YES | YES |
| 155 | a | 1244.53 | 1.84655   | YES | YES |

|     |   |         |           |     |     |
|-----|---|---------|-----------|-----|-----|
| 156 | a | 1245.45 | 22.15345  | YES | YES |
| 157 | a | 1248.74 | 23.36913  | YES | YES |
| 158 | a | 1253.44 | 0.37078   | YES | YES |
| 159 | a | 1268.80 | 92.71148  | YES | YES |
| 160 | a | 1299.49 | 1.98404   | YES | YES |
| 161 | a | 1314.37 | 1.70099   | YES | YES |
| 162 | a | 1357.83 | 1.17151   | YES | YES |
| 163 | a | 1358.63 | 0.09708   | YES | YES |
| 164 | a | 1363.72 | 7.45336   | YES | YES |
| 165 | a | 1365.01 | 8.90402   | YES | YES |
| 166 | a | 1366.92 | 14.21290  | YES | YES |
| 167 | a | 1372.32 | 9.71300   | YES | YES |
| 168 | a | 1378.31 | 2.65466   | YES | YES |
| 169 | a | 1380.49 | 6.77151   | YES | YES |
| 170 | a | 1381.61 | 7.62533   | YES | YES |
| 171 | a | 1383.04 | 3.47937   | YES | YES |
| 172 | a | 1384.58 | 1.17848   | YES | YES |
| 173 | a | 1393.09 | 13.98144  | YES | YES |
| 174 | a | 1405.14 | 1.11178   | YES | YES |
| 175 | a | 1408.43 | 8.52185   | YES | YES |
| 176 | a | 1413.26 | 0.70203   | YES | YES |
| 177 | a | 1419.61 | 37.74451  | YES | YES |
| 178 | a | 1426.90 | 6.04755   | YES | YES |
| 179 | a | 1430.38 | 21.34769  | YES | YES |
| 180 | a | 1440.65 | 18.94156  | YES | YES |
| 181 | a | 1443.13 | 22.11441  | YES | YES |
| 182 | a | 1446.82 | 19.45151  | YES | YES |
| 183 | a | 1453.96 | 6.23177   | YES | YES |
| 184 | a | 1454.95 | 13.81359  | YES | YES |
| 185 | a | 1457.10 | 4.78712   | YES | YES |
| 186 | a | 1457.55 | 6.96433   | YES | YES |
| 187 | a | 1458.32 | 12.33536  | YES | YES |
| 188 | a | 1459.01 | 26.74924  | YES | YES |
| 189 | a | 1471.12 | 21.67680  | YES | YES |
| 190 | a | 1487.14 | 198.00993 | YES | YES |
| 191 | a | 1488.98 | 280.32457 | YES | YES |
| 192 | a | 1491.64 | 94.92735  | YES | YES |
| 193 | a | 1499.07 | 267.68861 | YES | YES |
| 194 | a | 1551.52 | 0.14879   | YES | YES |
| 195 | a | 1555.19 | 0.73691   | YES | YES |
| 196 | a | 1600.74 | 1.56113   | YES | YES |
| 197 | a | 1602.91 | 0.05626   | YES | YES |
| 198 | a | 1604.23 | 0.14135   | YES | YES |
| 199 | a | 1605.92 | 1.57282   | YES | YES |
| 200 | a | 1639.38 | 14.45151  | YES | YES |
| 201 | a | 1639.85 | 9.50571   | YES | YES |
| 202 | a | 1641.39 | 15.78210  | YES | YES |
| 203 | a | 1642.54 | 8.36946   | YES | YES |
| 204 | a | 2953.19 | 1.31910   | YES | YES |
| 205 | a | 2957.32 | 1.58551   | YES | YES |
| 206 | a | 2959.96 | 5.42647   | YES | YES |
| 207 | a | 2960.10 | 2.29341   | YES | YES |
| 208 | a | 2961.87 | 1.79696   | YES | YES |
| 209 | a | 2964.56 | 1.43881   | YES | YES |
| 210 | a | 3025.89 | 8.62428   | YES | YES |

|     |   |         |         |     |     |
|-----|---|---------|---------|-----|-----|
| 211 | a | 3026.56 | 3.01688 | YES | YES |
| 212 | a | 3027.56 | 2.49235 | YES | YES |
| 213 | a | 3043.38 | 3.78378 | YES | YES |
| 214 | a | 3047.29 | 7.22196 | YES | YES |
| 215 | a | 3051.01 | 4.10124 | YES | YES |
| 216 | a | 3084.06 | 3.18194 | YES | YES |
| 217 | a | 3087.33 | 6.11865 | YES | YES |
| 218 | a | 3096.82 | 1.38678 | YES | YES |
| 219 | a | 3100.45 | 3.78553 | YES | YES |
| 220 | a | 3105.08 | 6.96389 | YES | YES |
| 221 | a | 3107.67 | 6.14823 | YES | YES |
| 222 | a | 3124.34 | 0.31330 | YES | YES |
| 223 | a | 3126.02 | 0.23512 | YES | YES |
| 224 | a | 3127.26 | 0.47843 | YES | YES |
| 225 | a | 3127.96 | 0.66487 | YES | YES |
| 226 | a | 3131.03 | 1.49114 | YES | YES |
| 227 | a | 3134.39 | 0.61141 | YES | YES |
| 228 | a | 3134.59 | 0.77577 | YES | YES |
| 229 | a | 3135.04 | 0.66170 | YES | YES |
| 230 | a | 3136.44 | 1.99262 | YES | YES |
| 231 | a | 3139.77 | 4.93211 | YES | YES |
| 232 | a | 3140.08 | 5.80637 | YES | YES |
| 233 | a | 3140.41 | 3.46476 | YES | YES |
| 234 | a | 3143.54 | 1.72314 | YES | YES |
| 235 | a | 3145.25 | 3.40125 | YES | YES |
| 236 | a | 3145.49 | 3.41520 | YES | YES |
| 237 | a | 3145.65 | 4.20903 | YES | YES |

Charge analysis by NBO, PABOON & QTAIM

| Atom | Charge (NBO) | Charge (PABOON) | Charge (QTAIM) |
|------|--------------|-----------------|----------------|
| 1 ca | 1.74686      | 1.2838          | 1.620658       |
| 2 c  | 0.35847      | 0.2532          | 0.529534       |
| 3 c  | 0.30950      | 0.1792          | 0.362785       |
| 4 c  | -0.27324     | -0.0260         | -0.004200      |
| 5 h  | 0.25330      | 0.0182          | 0.094704       |
| 6 c  | -0.20412     | 0.0225          | -0.013727      |
| 7 h  | 0.25543      | 0.0260          | 0.102718       |
| 8 c  | -0.19626     | 0.0239          | -0.016420      |
| 9 h  | 0.25727      | 0.0289          | 0.107133       |
| 10 c | -0.26526     | -0.0355         | -0.018215      |
| 11 h | 0.26530      | 0.0303          | 0.121427       |
| 12 f | -0.31570     | -0.1727         | -0.600277      |
| 13 f | -0.40295     | -0.2553         | -0.644329      |
| 14 c | 0.33292      | 0.2066          | 0.451311       |
| 15 c | 0.32352      | 0.1906          | 0.392948       |
| 16 c | -0.26878     | -0.0241         | -0.008867      |
| 17 h | 0.26244      | 0.0226          | 0.114627       |
| 18 c | -0.19760     | 0.0177          | -0.015048      |
| 19 h | 0.25861      | 0.0320          | 0.110968       |
| 20 c | -0.19330     | 0.0247          | -0.013250      |
| 21 h | 0.25809      | 0.0304          | 0.110218       |
| 22 c | -0.26000     | -0.0114         | -0.001059      |
| 23 h | 0.26555      | 0.0255          | 0.119944       |
| 24 f | -0.34871     | -0.1781         | -0.614238      |
| 25 f | -0.37956     | -0.2336         | -0.634618      |
| 26 c | 0.32938      | 0.2012          | 0.439018       |

|      |          |         |           |
|------|----------|---------|-----------|
| 27 c | 0.32915  | 0.1968  | 0.407290  |
| 28 c | -0.26154 | -0.0204 | -0.000903 |
| 29 h | 0.26442  | 0.0250  | 0.119397  |
| 30 c | -0.19294 | 0.0201  | -0.010444 |
| 31 h | 0.25971  | 0.0339  | 0.114062  |
| 32 c | -0.19347 | 0.0200  | -0.011685 |
| 33 h | 0.25906  | 0.0329  | 0.112551  |
| 34 c | -0.26072 | -0.0196 | -0.004077 |
| 35 h | 0.26492  | 0.0253  | 0.121205  |
| 36 f | -0.36450 | -0.2020 | -0.617969 |
| 37 f | -0.38146 | -0.2389 | -0.631756 |
| 38 c | 0.32376  | 0.1942  | 0.398599  |
| 39 c | 0.32185  | 0.1932  | 0.424673  |
| 40 c | -0.26004 | -0.0179 | -0.003327 |
| 41 h | 0.26625  | 0.0270  | 0.123254  |
| 42 c | -0.19036 | 0.0233  | -0.010303 |
| 43 h | 0.26079  | 0.0348  | 0.116075  |
| 44 c | -0.19080 | 0.0232  | -0.009264 |
| 45 h | 0.26129  | 0.0357  | 0.117629  |
| 46 c | -0.25769 | -0.0144 | -0.000197 |
| 47 h | 0.26786  | 0.0278  | 0.126517  |
| 48 f | -0.38166 | -0.2366 | -0.623078 |
| 49 f | -0.36437 | -0.2155 | -0.635704 |
| 50 c | -0.08953 | 0.1198  | -0.088930 |
| 51 c | -0.07946 | 0.1549  | -0.076535 |
| 52 c | -0.08107 | 0.1186  | -0.075528 |
| 53 c | -0.06902 | 0.1036  | -0.073578 |
| 54 c | -0.06903 | 0.0887  | -0.072562 |
| 55 c | -0.06586 | 0.1236  | -0.064423 |
| 56 c | -0.66075 | -0.1957 | -0.050978 |
| 57 h | 0.26459  | 0.0627  | 0.077267  |
| 58 h | 0.23982  | 0.0424  | 0.049994  |
| 59 h | 0.24020  | 0.0362  | 0.047282  |
| 60 c | -0.65484 | -0.2011 | -0.047158 |
| 61 h | 0.26237  | 0.0549  | 0.073095  |
| 62 h | 0.23140  | 0.0445  | 0.033056  |
| 63 h | 0.24510  | 0.0463  | 0.059584  |
| 64 c | -0.65673 | -0.2017 | -0.043380 |
| 65 h | 0.26395  | 0.0610  | 0.076216  |
| 66 h | 0.23803  | 0.0406  | 0.051839  |
| 67 h | 0.23680  | 0.0407  | 0.042978  |
| 68 c | -0.65976 | -0.1963 | -0.049554 |
| 69 h | 0.24449  | 0.0422  | 0.056566  |
| 70 h | 0.24280  | 0.0469  | 0.048056  |
| 71 h | 0.26057  | 0.0546  | 0.071980  |
| 72 c | -0.65992 | -0.1915 | -0.047865 |
| 73 h | 0.24459  | 0.0397  | 0.053022  |
| 74 h | 0.23496  | 0.0346  | 0.039429  |
| 75 h | 0.26504  | 0.0627  | 0.076720  |
| 76 c | -0.65576 | -0.1985 | -0.042785 |
| 77 h | 0.26239  | 0.0561  | 0.073677  |
| 78 h | 0.22949  | 0.0366  | 0.029709  |
| 79 h | 0.24449  | 0.0442  | 0.056517  |

[Sr(HMB)O<sub>4</sub>DFB<sub>4</sub>]<sup>2+</sup> 6<sup>2+</sup>

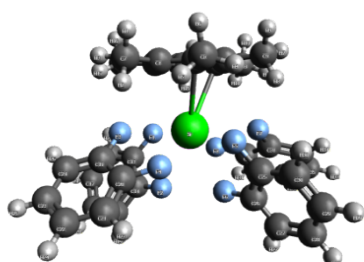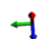

Atomic coordinates

|   |            |            |            |
|---|------------|------------|------------|
| C | 2.3920369  | 0.9669280  | -1.8637739 |
| C | 2.7655147  | -0.3650225 | -1.5077175 |
| C | 2.0254978  | -1.4825438 | -1.9966540 |
| C | 0.8543397  | -1.2595167 | -2.7804331 |
| C | 0.4851826  | 0.0711501  | -3.1468802 |
| C | 1.2432417  | 1.1899445  | -2.6837802 |
| C | 3.2919007  | 2.0969157  | -1.4103119 |
| H | 4.3356458  | 1.9129811  | -1.7455208 |
| H | 3.3338650  | 2.1878642  | -0.3018853 |
| H | 2.9924022  | 3.0803253  | -1.8125709 |
| C | 4.0117831  | -0.5813960 | -0.6777720 |
| H | 4.0423836  | -1.5801891 | -0.2056698 |
| H | 4.1136460  | 0.1727203  | 0.1291639  |
| H | 4.9233743  | -0.4896762 | -1.3129497 |
| C | 2.5468806  | -2.8787446 | -1.7308280 |
| H | 1.9996482  | -3.6530926 | -2.2975318 |
| H | 2.4973460  | -3.1531791 | -0.6544282 |
| H | 3.6132800  | -2.9520050 | -2.0334202 |
| C | 0.0158437  | -2.4081762 | -3.2998244 |
| H | 0.2811085  | -2.6450247 | -4.3559578 |
| H | -1.0661777 | -2.1641942 | -3.2949698 |
| H | 0.1492426  | -3.3366737 | -2.7155969 |
| C | -0.6827828 | 0.2578498  | -4.0930096 |
| H | -0.5932804 | -0.4295075 | -4.9605544 |
| H | -0.7438414 | 1.2831770  | -4.4991395 |
| H | -1.6606651 | 0.0329322  | -3.6097916 |
| C | 0.8427227  | 2.5858708  | -3.1142220 |
| H | 1.1807529  | 2.7875318  | -4.1560752 |
| H | 1.2776405  | 3.3716783  | -2.4715398 |
| H | -0.2562100 | 2.7223799  | -3.0945118 |
| C | -2.4144727 | 2.5189850  | -0.4966605 |
| C | -2.3635683 | 2.3725980  | 0.8912097  |
| C | -2.9658390 | 3.2925084  | 1.7428817  |
| H | -2.9036375 | 3.1559850  | 2.8330715  |
| C | -3.6415959 | 4.3814831  | 1.1600808  |
| H | -4.1327861 | 5.1208360  | 1.8110360  |
| C | -3.6966447 | 4.5285401  | -0.2376508 |
| H | -4.2320027 | 5.3822598  | -0.6807419 |
| C | -3.0754205 | 3.5918088  | -1.0864887 |
| H | -3.1074665 | 3.6870057  | -2.1825244 |
| F | -1.7593932 | 1.5722608  | -1.2554343 |
| F | -1.6611601 | 1.2924853  | 1.3839261  |



|    |            |            |            |
|----|------------|------------|------------|
| C  | 0.6890766  | 3.2907993  | 1.1870104  |
| C  | 1.1207201  | 2.4920390  | 2.2468266  |
| C  | 1.3244765  | 3.0227078  | 3.5163602  |
| H  | 1.6670196  | 2.3759890  | 4.3383670  |
| C  | 1.0815984  | 4.3984302  | 3.6969627  |
| H  | 1.2406092  | 4.8452954  | 4.6903424  |
| C  | 0.6426829  | 5.2009620  | 2.6281123  |
| H  | 0.4579881  | 6.2744877  | 2.7864212  |
| C  | 0.4375119  | 4.6485028  | 1.3494211  |
| H  | 0.0887616  | 5.2518519  | 0.4978184  |
| F  | 0.4972271  | 2.6613600  | -0.0251046 |
| F  | 1.3177875  | 1.1526288  | 1.9791034  |
| C  | 1.2261999  | -2.3326955 | 2.3765324  |
| C  | -0.1096761 | -2.1595923 | 2.7454642  |
| C  | -0.7098070 | -2.9745109 | 3.6999193  |
| H  | -1.7657352 | -2.8203600 | 3.9690414  |
| C  | 0.0766598  | -3.9795295 | 4.2950811  |
| H  | -0.3729869 | -4.6335348 | 5.0578195  |
| C  | 1.4234458  | -4.1501662 | 3.9279196  |
| H  | 2.0286600  | -4.9369649 | 4.4037072  |
| C  | 2.0150041  | -3.3222219 | 2.9541852  |
| H  | 3.0667882  | -3.4376639 | 2.6511170  |
| F  | 1.7275937  | -1.4979295 | 1.3985445  |
| F  | -0.8185118 | -1.1626698 | 2.1088465  |
| C  | -1.4666916 | -3.2595464 | -0.0961459 |
| C  | -2.5456416 | -2.4113734 | -0.3490617 |
| C  | -3.8572857 | -2.8706200 | -0.2974700 |
| H  | -4.6932152 | -2.1846825 | -0.5024362 |
| C  | -4.0630818 | -4.2272257 | 0.0208782  |
| H  | -5.0911835 | -4.6181114 | 0.0642230  |
| C  | -2.9754643 | -5.0803513 | 0.2812871  |
| H  | -3.1533413 | -6.1381351 | 0.5284262  |
| C  | -1.6531084 | -4.5992018 | 0.2269248  |
| H  | -0.7845239 | -5.2444831 | 0.4271806  |
| F  | -0.2070352 | -2.7056237 | -0.1700977 |
| F  | -2.2512721 | -1.0938301 | -0.6444203 |
| Sr | 0.1304151  | -0.0120931 | -0.1536558 |

### Vibrational analysis

| mode | symmetry | wave number<br>cm**(-1) | IR intensity<br>km/mol | selection rules |       |
|------|----------|-------------------------|------------------------|-----------------|-------|
|      |          |                         |                        | IR              | RAMAN |
| 1    |          | -0.00                   | 0.00000                | -               | -     |
| 2    |          | -0.00                   | 0.00000                | -               | -     |
| 3    |          | 0.00                    | 0.00000                | -               | -     |
| 4    |          | 0.00                    | 0.00000                | -               | -     |
| 5    |          | 0.00                    | 0.00000                | -               | -     |
| 6    |          | 0.00                    | 0.00000                | -               | -     |
| 7    | a        | 7.56                    | 0.03078                | YES             | YES   |
| 8    | a        | 12.65                   | 0.21775                | YES             | YES   |
| 9    | a        | 14.38                   | 0.05365                | YES             | YES   |
| 10   | a        | 18.08                   | 0.12805                | YES             | YES   |
| 11   | a        | 22.20                   | 0.39970                | YES             | YES   |
| 12   | a        | 28.42                   | 0.46838                | YES             | YES   |
| 13   | a        | 30.43                   | 0.93369                | YES             | YES   |

|    |   |        |          |     |     |
|----|---|--------|----------|-----|-----|
| 14 | a | 38.73  | 0.22282  | YES | YES |
| 15 | a | 43.45  | 0.18332  | YES | YES |
| 16 | a | 44.86  | 0.20863  | YES | YES |
| 17 | a | 46.77  | 0.06447  | YES | YES |
| 18 | a | 57.78  | 0.24628  | YES | YES |
| 19 | a | 59.10  | 0.26270  | YES | YES |
| 20 | a | 66.69  | 1.09037  | YES | YES |
| 21 | a | 72.66  | 0.40402  | YES | YES |
| 22 | a | 75.92  | 0.12488  | YES | YES |
| 23 | a | 76.50  | 1.36944  | YES | YES |
| 24 | a | 78.34  | 1.79690  | YES | YES |
| 25 | a | 79.81  | 0.03613  | YES | YES |
| 26 | a | 83.74  | 0.36680  | YES | YES |
| 27 | a | 86.11  | 3.58860  | YES | YES |
| 28 | a | 91.56  | 0.79691  | YES | YES |
| 29 | a | 94.13  | 1.73468  | YES | YES |
| 30 | a | 99.12  | 3.32697  | YES | YES |
| 31 | a | 102.29 | 1.98906  | YES | YES |
| 32 | a | 119.39 | 3.30746  | YES | YES |
| 33 | a | 122.19 | 2.79581  | YES | YES |
| 34 | a | 126.97 | 0.19981  | YES | YES |
| 35 | a | 133.39 | 0.94624  | YES | YES |
| 36 | a | 140.52 | 16.85117 | YES | YES |
| 37 | a | 146.82 | 14.40462 | YES | YES |
| 38 | a | 153.15 | 29.87893 | YES | YES |
| 39 | a | 157.16 | 6.41038  | YES | YES |
| 40 | a | 165.81 | 10.06073 | YES | YES |
| 41 | a | 168.77 | 1.09013  | YES | YES |
| 42 | a | 189.63 | 6.17033  | YES | YES |
| 43 | a | 203.15 | 0.09284  | YES | YES |
| 44 | a | 203.47 | 0.20053  | YES | YES |
| 45 | a | 207.87 | 0.34204  | YES | YES |
| 46 | a | 211.12 | 0.16546  | YES | YES |
| 47 | a | 253.74 | 36.24847 | YES | YES |
| 48 | a | 285.85 | 0.94768  | YES | YES |
| 49 | a | 287.81 | 0.84517  | YES | YES |
| 50 | a | 290.23 | 0.94313  | YES | YES |
| 51 | a | 290.66 | 0.63336  | YES | YES |
| 52 | a | 305.34 | 5.36116  | YES | YES |
| 53 | a | 306.63 | 0.32110  | YES | YES |
| 54 | a | 310.17 | 11.39157 | YES | YES |
| 55 | a | 313.05 | 2.49792  | YES | YES |
| 56 | a | 330.35 | 0.40843  | YES | YES |
| 57 | a | 350.43 | 0.54487  | YES | YES |
| 58 | a | 370.93 | 1.07701  | YES | YES |
| 59 | a | 387.02 | 1.57636  | YES | YES |
| 60 | a | 392.69 | 0.11470  | YES | YES |
| 61 | a | 411.27 | 0.01033  | YES | YES |
| 62 | a | 431.85 | 0.03012  | YES | YES |
| 63 | a | 433.48 | 0.03053  | YES | YES |
| 64 | a | 434.55 | 0.07863  | YES | YES |
| 65 | a | 435.19 | 0.05362  | YES | YES |
| 66 | a | 438.32 | 2.67426  | YES | YES |
| 67 | a | 438.90 | 0.25994  | YES | YES |
| 68 | a | 439.25 | 2.06380  | YES | YES |

|     |   |        |           |     |     |
|-----|---|--------|-----------|-----|-----|
| 69  | a | 440.21 | 2.76304   | YES | YES |
| 70  | a | 441.29 | 2.35114   | YES | YES |
| 71  | a | 442.92 | 0.01684   | YES | YES |
| 72  | a | 445.30 | 0.01696   | YES | YES |
| 73  | a | 533.65 | 1.94886   | YES | YES |
| 74  | a | 533.83 | 1.13180   | YES | YES |
| 75  | a | 534.92 | 0.53501   | YES | YES |
| 76  | a | 535.49 | 0.56357   | YES | YES |
| 77  | a | 538.73 | 7.72007   | YES | YES |
| 78  | a | 539.60 | 2.58810   | YES | YES |
| 79  | a | 540.02 | 6.31161   | YES | YES |
| 80  | a | 541.14 | 0.94897   | YES | YES |
| 81  | a | 549.94 | 2.95614   | YES | YES |
| 82  | a | 556.18 | 9.79828   | YES | YES |
| 83  | a | 556.40 | 46.54349  | YES | YES |
| 84  | a | 556.77 | 13.14464  | YES | YES |
| 85  | a | 558.48 | 13.99935  | YES | YES |
| 86  | a | 564.75 | 0.17981   | YES | YES |
| 87  | a | 572.92 | 0.57276   | YES | YES |
| 88  | a | 579.12 | 0.64828   | YES | YES |
| 89  | a | 580.31 | 0.62286   | YES | YES |
| 90  | a | 666.05 | 0.03016   | YES | YES |
| 91  | a | 667.09 | 0.05645   | YES | YES |
| 92  | a | 669.17 | 0.02693   | YES | YES |
| 93  | a | 669.18 | 0.01886   | YES | YES |
| 94  | a | 699.28 | 0.25944   | YES | YES |
| 95  | a | 747.02 | 51.26555  | YES | YES |
| 96  | a | 747.71 | 67.56720  | YES | YES |
| 97  | a | 749.46 | 89.76369  | YES | YES |
| 98  | a | 750.17 | 81.44684  | YES | YES |
| 99  | a | 750.60 | 162.97659 | YES | YES |
| 100 | a | 751.44 | 14.66166  | YES | YES |
| 101 | a | 751.99 | 106.15246 | YES | YES |
| 102 | a | 756.03 | 82.71623  | YES | YES |
| 103 | a | 789.45 | 1.15022   | YES | YES |
| 104 | a | 798.80 | 4.07376   | YES | YES |
| 105 | a | 812.56 | 2.41763   | YES | YES |
| 106 | a | 814.05 | 2.30789   | YES | YES |
| 107 | a | 815.13 | 26.60994  | YES | YES |
| 108 | a | 815.88 | 23.12351  | YES | YES |
| 109 | a | 839.70 | 0.00664   | YES | YES |
| 110 | a | 839.76 | 0.04979   | YES | YES |
| 111 | a | 840.16 | 0.02926   | YES | YES |
| 112 | a | 842.12 | 0.06866   | YES | YES |
| 113 | a | 933.52 | 2.29221   | YES | YES |
| 114 | a | 933.86 | 1.82409   | YES | YES |
| 115 | a | 933.95 | 1.44620   | YES | YES |
| 116 | a | 935.54 | 1.68784   | YES | YES |
| 117 | a | 950.20 | 0.28920   | YES | YES |
| 118 | a | 962.03 | 0.26452   | YES | YES |
| 119 | a | 970.99 | 3.51328   | YES | YES |
| 120 | a | 976.08 | 12.73348  | YES | YES |
| 121 | a | 983.25 | 0.03004   | YES | YES |
| 122 | a | 983.55 | 0.00810   | YES | YES |
| 123 | a | 984.07 | 0.00232   | YES | YES |

|     |   |         |           |     |     |
|-----|---|---------|-----------|-----|-----|
| 124 | a | 984.88  | 0.00245   | YES | YES |
| 125 | a | 999.51  | 3.73274   | YES | YES |
| 126 | a | 1001.54 | 1.39826   | YES | YES |
| 127 | a | 1015.54 | 3.32178   | YES | YES |
| 128 | a | 1015.74 | 3.99303   | YES | YES |
| 129 | a | 1016.67 | 5.33415   | YES | YES |
| 130 | a | 1016.78 | 2.99845   | YES | YES |
| 131 | a | 1024.30 | 0.92094   | YES | YES |
| 132 | a | 1025.08 | 1.47625   | YES | YES |
| 133 | a | 1028.71 | 2.20939   | YES | YES |
| 134 | a | 1047.75 | 22.25398  | YES | YES |
| 135 | a | 1051.78 | 11.08929  | YES | YES |
| 136 | a | 1072.68 | 0.27735   | YES | YES |
| 137 | a | 1073.06 | 2.08554   | YES | YES |
| 138 | a | 1074.92 | 7.45983   | YES | YES |
| 139 | a | 1077.19 | 9.52728   | YES | YES |
| 140 | a | 1078.18 | 56.76015  | YES | YES |
| 141 | a | 1079.06 | 48.49878  | YES | YES |
| 142 | a | 1080.39 | 5.27881   | YES | YES |
| 143 | a | 1131.66 | 5.89962   | YES | YES |
| 144 | a | 1134.16 | 0.66245   | YES | YES |
| 145 | a | 1137.30 | 17.01364  | YES | YES |
| 146 | a | 1139.22 | 20.41788  | YES | YES |
| 147 | a | 1141.33 | 4.75378   | YES | YES |
| 148 | a | 1141.60 | 2.76111   | YES | YES |
| 149 | a | 1141.68 | 1.86999   | YES | YES |
| 150 | a | 1141.82 | 3.13989   | YES | YES |
| 151 | a | 1229.78 | 0.40029   | YES | YES |
| 152 | a | 1231.53 | 110.74249 | YES | YES |
| 153 | a | 1236.23 | 349.69422 | YES | YES |
| 154 | a | 1244.24 | 88.25237  | YES | YES |
| 155 | a | 1245.13 | 1.94579   | YES | YES |
| 156 | a | 1245.39 | 1.67834   | YES | YES |
| 157 | a | 1245.64 | 18.49839  | YES | YES |
| 158 | a | 1245.75 | 18.91515  | YES | YES |
| 159 | a | 1252.36 | 0.58614   | YES | YES |
| 160 | a | 1299.85 | 2.50547   | YES | YES |
| 161 | a | 1309.80 | 1.25284   | YES | YES |
| 162 | a | 1357.35 | 0.64737   | YES | YES |
| 163 | a | 1358.99 | 2.12050   | YES | YES |
| 164 | a | 1363.82 | 4.98903   | YES | YES |
| 165 | a | 1365.17 | 8.40656   | YES | YES |
| 166 | a | 1371.45 | 9.21180   | YES | YES |
| 167 | a | 1374.06 | 8.64339   | YES | YES |
| 168 | a | 1379.69 | 3.60026   | YES | YES |
| 169 | a | 1379.89 | 2.58483   | YES | YES |
| 170 | a | 1380.76 | 10.14908  | YES | YES |
| 171 | a | 1380.99 | 2.81522   | YES | YES |
| 172 | a | 1384.46 | 1.06751   | YES | YES |
| 173 | a | 1390.54 | 10.70311  | YES | YES |
| 174 | a | 1403.01 | 1.12506   | YES | YES |
| 175 | a | 1409.36 | 8.10850   | YES | YES |
| 176 | a | 1413.05 | 4.73448   | YES | YES |
| 177 | a | 1422.25 | 6.67894   | YES | YES |
| 178 | a | 1423.46 | 50.42002  | YES | YES |

|     |   |         |           |     |     |
|-----|---|---------|-----------|-----|-----|
| 179 | a | 1428.48 | 3.80253   | YES | YES |
| 180 | a | 1438.54 | 35.79240  | YES | YES |
| 181 | a | 1443.25 | 4.85057   | YES | YES |
| 182 | a | 1448.03 | 44.15152  | YES | YES |
| 183 | a | 1452.73 | 4.38115   | YES | YES |
| 184 | a | 1456.97 | 8.07051   | YES | YES |
| 185 | a | 1457.18 | 12.90318  | YES | YES |
| 186 | a | 1457.59 | 7.44582   | YES | YES |
| 187 | a | 1457.83 | 4.92936   | YES | YES |
| 188 | a | 1465.91 | 27.34644  | YES | YES |
| 189 | a | 1469.04 | 11.17882  | YES | YES |
| 190 | a | 1488.49 | 30.67183  | YES | YES |
| 191 | a | 1489.00 | 467.33246 | YES | YES |
| 192 | a | 1489.20 | 186.23866 | YES | YES |
| 193 | a | 1493.42 | 178.81147 | YES | YES |
| 194 | a | 1549.75 | 0.04994   | YES | YES |
| 195 | a | 1555.80 | 0.14412   | YES | YES |
| 196 | a | 1604.73 | 0.47723   | YES | YES |
| 197 | a | 1605.15 | 0.11317   | YES | YES |
| 198 | a | 1606.05 | 0.07703   | YES | YES |
| 199 | a | 1606.87 | 1.25536   | YES | YES |
| 200 | a | 1636.40 | 16.96656  | YES | YES |
| 201 | a | 1636.80 | 6.34876   | YES | YES |
| 202 | a | 1639.01 | 13.36226  | YES | YES |
| 203 | a | 1639.24 | 6.15725   | YES | YES |
| 204 | a | 2950.76 | 2.69507   | YES | YES |
| 205 | a | 2953.49 | 4.61513   | YES | YES |
| 206 | a | 2954.68 | 4.61232   | YES | YES |
| 207 | a | 2955.42 | 0.69430   | YES | YES |
| 208 | a | 2962.33 | 1.40765   | YES | YES |
| 209 | a | 2964.11 | 3.83960   | YES | YES |
| 210 | a | 3020.21 | 5.78411   | YES | YES |
| 211 | a | 3027.05 | 5.54754   | YES | YES |
| 212 | a | 3031.66 | 4.94509   | YES | YES |
| 213 | a | 3034.51 | 4.19419   | YES | YES |
| 214 | a | 3034.82 | 2.18799   | YES | YES |
| 215 | a | 3049.45 | 5.82821   | YES | YES |
| 216 | a | 3087.24 | 1.34494   | YES | YES |
| 217 | a | 3091.42 | 7.64362   | YES | YES |
| 218 | a | 3093.61 | 2.83394   | YES | YES |
| 219 | a | 3099.29 | 6.40249   | YES | YES |
| 220 | a | 3100.54 | 4.59021   | YES | YES |
| 221 | a | 3105.48 | 7.57685   | YES | YES |
| 222 | a | 3126.16 | 0.49374   | YES | YES |
| 223 | a | 3126.27 | 0.58519   | YES | YES |
| 224 | a | 3126.65 | 0.47764   | YES | YES |
| 225 | a | 3127.06 | 0.54269   | YES | YES |
| 226 | a | 3133.30 | 1.25164   | YES | YES |
| 227 | a | 3133.46 | 1.01606   | YES | YES |
| 228 | a | 3134.06 | 0.83954   | YES | YES |
| 229 | a | 3134.22 | 0.95629   | YES | YES |
| 230 | a | 3138.61 | 4.23127   | YES | YES |
| 231 | a | 3138.79 | 4.65762   | YES | YES |
| 232 | a | 3139.27 | 3.54652   | YES | YES |
| 233 | a | 3139.40 | 4.08994   | YES | YES |

|     |   |         |         |     |     |
|-----|---|---------|---------|-----|-----|
| 234 | a | 3144.42 | 3.43858 | YES | YES |
| 235 | a | 3144.48 | 2.97735 | YES | YES |
| 236 | a | 3144.74 | 2.95571 | YES | YES |
| 237 | a | 3145.08 | 3.20501 | YES | YES |

Charge analysis by NBO, PABOON & QTAIM

| Atom | Charge (NBO) | Charge (PABOON) | Charge (QTAIM) |
|------|--------------|-----------------|----------------|
| 1 c  | -0.07623     | 0.0638          | -0.075347      |
| 2 c  | -0.08006     | 0.0321          | -0.084491      |
| 3 c  | -0.06491     | 0.0577          | -0.062545      |
| 4 c  | -0.08235     | 0.0552          | -0.081059      |
| 5 c  | -0.06896     | 0.0621          | -0.074434      |
| 6 c  | -0.07503     | 0.0328          | -0.068855      |
| 7 c  | -0.65486     | -0.1797         | -0.044644      |
| 8 h  | 0.25970      | 0.0560          | 0.070665       |
| 9 h  | 0.23309      | 0.0546          | 0.032754       |
| 10 h | 0.24258      | 0.0484          | 0.056184       |
| 11 c | -0.66281     | -0.1769         | -0.050208      |
| 12 h | 0.24140      | 0.0389          | 0.048839       |
| 13 h | 0.24085      | 0.0481          | 0.040877       |
| 14 h | 0.26280      | 0.0631          | 0.074018       |
| 15 c | -0.65685     | -0.1969         | -0.043617      |
| 16 h | 0.24314      | 0.0495          | 0.055385       |
| 17 h | 0.23653      | 0.0510          | 0.040417       |
| 18 h | 0.25840      | 0.0518          | 0.068796       |
| 19 c | -0.66443     | -0.1732         | -0.049519      |
| 20 h | 0.26506      | 0.0659          | 0.076266       |
| 21 h | 0.23821      | 0.0566          | 0.037694       |
| 22 h | 0.23778      | 0.0526          | 0.047783       |
| 23 c | -0.65980     | -0.1849         | -0.050051      |
| 24 h | 0.25651      | 0.0549          | 0.067086       |
| 25 h | 0.24638      | 0.0445          | 0.057877       |
| 26 h | 0.24088      | 0.0644          | 0.041720       |
| 27 c | -0.65782     | -0.2013         | -0.042291      |
| 28 h | 0.26288      | 0.0588          | 0.073782       |
| 29 h | 0.23713      | 0.0476          | 0.047909       |
| 30 h | 0.23513      | 0.0446          | 0.040455       |
| 31 c | 0.33143      | 0.2090          | 0.428372       |
| 32 c | 0.32141      | 0.2032          | 0.419579       |
| 33 c | -0.25951     | -0.0158         | -0.002869      |
| 34 h | 0.26540      | 0.0278          | 0.120133       |
| 35 c | -0.19728     | 0.0188          | -0.013885      |
| 36 h | 0.25830      | 0.0323          | 0.110348       |
| 37 c | -0.19589     | 0.0202          | -0.014985      |
| 38 h | 0.25917      | 0.0338          | 0.112801       |
| 39 c | -0.26318     | -0.0240         | -0.006421      |
| 40 h | 0.26426      | 0.0273          | 0.118092       |
| 41 f | -0.36901     | -0.2200         | -0.624493      |
| 42 f | -0.37004     | -0.2133         | -0.619080      |
| 43 c | 0.31645      | 0.1969          | 0.413318       |
| 44 c | 0.33089      | 0.2182          | 0.423031       |
| 45 c | -0.25884     | -0.0158         | -0.003490      |
| 46 h | 0.26623      | 0.0290          | 0.123412       |
| 47 c | -0.19398     | 0.0221          | -0.012877      |
| 48 h | 0.25960      | 0.0345          | 0.113777       |

|    |    |          |         |           |
|----|----|----------|---------|-----------|
| 49 | c  | -0.19518 | 0.0207  | -0.012802 |
| 50 | h  | 0.25849  | 0.0327  | 0.111128  |
| 51 | c  | -0.26117 | -0.0161 | -0.003013 |
| 52 | h  | 0.26439  | 0.0258  | 0.118488  |
| 53 | f  | -0.36929 | -0.2169 | -0.637684 |
| 54 | f  | -0.37072 | -0.2009 | -0.615580 |
| 55 | c  | 0.33094  | 0.2062  | 0.424922  |
| 56 | c  | 0.32264  | 0.2024  | 0.422519  |
| 57 | c  | -0.26022 | -0.0179 | -0.004512 |
| 58 | h  | 0.26512  | 0.0276  | 0.120310  |
| 59 | c  | -0.19692 | 0.0186  | -0.014123 |
| 60 | h  | 0.25843  | 0.0327  | 0.111269  |
| 61 | c  | -0.19524 | 0.0208  | -0.013892 |
| 62 | h  | 0.25910  | 0.0337  | 0.113005  |
| 63 | c  | -0.26296 | -0.0238 | -0.006145 |
| 64 | h  | 0.26406  | 0.0270  | 0.118305  |
| 65 | f  | -0.37162 | -0.2251 | -0.624829 |
| 66 | f  | -0.36907 | -0.2134 | -0.617572 |
| 67 | c  | 0.31797  | 0.1984  | 0.417551  |
| 68 | c  | 0.33074  | 0.2148  | 0.416710  |
| 69 | c  | -0.25818 | -0.0162 | -0.002764 |
| 70 | h  | 0.26610  | 0.0283  | 0.124004  |
| 71 | c  | -0.19296 | 0.0235  | -0.011092 |
| 72 | h  | 0.25978  | 0.0347  | 0.114085  |
| 73 | c  | -0.19402 | 0.0216  | -0.012397 |
| 74 | h  | 0.25891  | 0.0333  | 0.112731  |
| 75 | c  | -0.26117 | -0.0174 | -0.004625 |
| 76 | h  | 0.26428  | 0.0260  | 0.119077  |
| 77 | f  | -0.36790 | -0.2113 | -0.637504 |
| 78 | f  | -0.37539 | -0.2080 | -0.618792 |
| 79 | sr | 1.78126  | 1.4120  | 1.657010  |

[Ba(HMB)oDFB<sub>4</sub>]<sup>2+</sup>

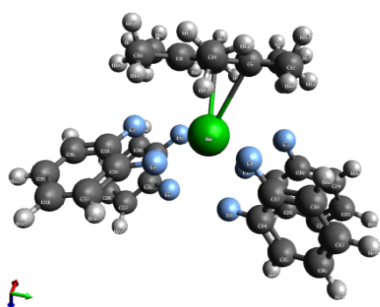

Atomic coordinates

|   |           |            |            |
|---|-----------|------------|------------|
| C | 2.4889610 | 0.9128569  | -2.0735830 |
| C | 2.8472608 | -0.4095713 | -1.6772551 |
| C | 2.0834884 | -1.5296352 | -2.1213680 |
| C | 0.8980848 | -1.3154139 | -2.8849600 |
| C | 0.5298287 | 0.0095741  | -3.2705847 |
| C | 1.3057863 | 1.1286155  | -2.8425264 |
| C | 3.4157515 | 2.0548158  | -1.7108161 |
| H | 4.4700239 | 1.7794412  | -1.9236673 |
| H | 3.3699207 | 2.3224517  | -0.6303949 |

|   |            |            |            |
|---|------------|------------|------------|
| H | 3.2010425  | 2.9733735  | -2.2866976 |
| C | 4.0792855  | -0.6246459 | -0.8242575 |
| H | 4.0197732  | -1.5544520 | -0.2263087 |
| H | 4.2516352  | 0.2144935  | -0.1198149 |
| H | 4.9946694  | -0.7029038 | -1.4562376 |
| C | 2.5840457  | -2.9255460 | -1.8137203 |
| H | 2.1006472  | -3.6941769 | -2.4442611 |
| H | 2.4189462  | -3.2148029 | -0.7513384 |
| H | 3.6756192  | -2.9964284 | -2.0014903 |
| C | 0.0293549  | -2.4736633 | -3.3293470 |
| H | 0.2620039  | -2.7695196 | -4.3784318 |
| H | -1.0487438 | -2.2123178 | -3.3062642 |
| H | 0.1657172  | -3.3727797 | -2.7007433 |
| C | -0.6686069 | 0.2031897  | -4.1777600 |
| H | -0.7212647 | -0.5979081 | -4.9425385 |
| H | -0.6277922 | 1.1638364  | -4.7242596 |
| H | -1.6356885 | 0.1805607  | -3.6223556 |
| C | 0.8827952  | 2.5314337  | -3.2293249 |
| H | 1.2950444  | 2.8157960  | -4.2247629 |
| H | 1.2320674  | 3.2869172  | -2.5007566 |
| H | -0.2188420 | 2.6257033  | -3.2928811 |
| C | -2.3150852 | 2.8017150  | -0.3161867 |
| C | -2.3524207 | 2.5248882  | 1.0538315  |
| C | -2.8446335 | 3.4511456  | 1.9679057  |
| H | -2.8603802 | 3.2070561  | 3.0406394  |
| C | -3.3051446 | 4.6849296  | 1.4730858  |
| H | -3.7033025 | 5.4320938  | 2.1764451  |
| C | -3.2654787 | 4.9661290  | 0.0956750  |
| H | -3.6346205 | 5.9326960  | -0.2802583 |
| C | -2.7646546 | 4.0193210  | -0.8184396 |
| H | -2.7308133 | 4.2150623  | -1.9010321 |
| F | -1.7878318 | 1.8348638  | -1.1460879 |
| F | -1.8499075 | 1.3119561  | 1.4690590  |
| C | 0.6443236  | 3.4967930  | 1.1784550  |
| C | 0.8284129  | 2.7555377  | 2.3487372  |
| C | 0.7092330  | 3.3483966  | 3.6021821  |
| H | 0.8612758  | 2.7476682  | 4.5118651  |
| C | 0.4027324  | 4.7218577  | 3.6550225  |
| H | 0.3109132  | 5.2138645  | 4.6354904  |
| C | 0.2236249  | 5.4662282  | 2.4752081  |
| H | -0.0100050 | 6.5403231  | 2.5319167  |
| C | 0.3435887  | 4.8540920  | 1.2139793  |
| H | 0.2020948  | 5.4116466  | 0.2761983  |
| F | 0.7393570  | 2.8147305  | -0.0167861 |
| F | 1.1081108  | 1.4138567  | 2.2095673  |
| C | 1.2029331  | -2.4940951 | 2.4663385  |
| C | -0.1456877 | -2.3423497 | 2.8013626  |
| C | -0.7879242 | -3.2473011 | 3.6411729  |
| H | -1.8520965 | -3.1075328 | 3.8844333  |
| C | -0.0368386 | -4.3211773 | 4.1549022  |
| H | -0.5223118 | -5.0450531 | 4.8271951  |
| C | 1.3209967  | -4.4713583 | 3.8213009  |
| H | 1.9003469  | -5.3119883 | 4.2329584  |
| C | 1.9568275  | -3.5523355 | 2.9645334  |
| H | 3.0187289  | -3.6484478 | 2.6913479  |



|    |            |            |            |
|----|------------|------------|------------|
| F  | 1.7566183  | -1.5711504 | 1.6022676  |
| F  | -0.8278835 | -1.2820574 | 2.2467060  |
| C  | -1.4041350 | -3.3955272 | -0.0400373 |
| C  | -2.5213442 | -2.5975442 | -0.2980674 |
| C  | -3.8119306 | -3.1063599 | -0.1902888 |
| H  | -4.6782987 | -2.4611292 | -0.4012940 |
| C  | -3.9586857 | -4.4541939 | 0.1903233  |
| H  | -4.9699446 | -4.8800596 | 0.2778554  |
| C  | -2.8330160 | -5.2545356 | 0.4562043  |
| H  | -2.9630889 | -6.3066274 | 0.7524902  |
| C  | -1.5331337 | -4.7260097 | 0.3445924  |
| H  | -0.6345300 | -5.3274498 | 0.5489681  |
| F  | -0.1644072 | -2.8066396 | -0.1619266 |
| F  | -2.2948910 | -1.2824857 | -0.6517533 |
| Ba | 0.1534922  | 0.0172631  | -0.1093505 |

### Vibrational analysis

| mode | symmetry | wave number<br>cm <sup>**</sup> (-1) | IR intensity<br>km/mol | selection rules |       |
|------|----------|--------------------------------------|------------------------|-----------------|-------|
|      |          |                                      |                        | IR              | RAMAN |
| 1    |          | -0.00                                | 0.00000                | -               | -     |
| 2    |          | -0.00                                | 0.00000                | -               | -     |
| 3    |          | 0.00                                 | 0.00000                | -               | -     |
| 4    |          | 0.00                                 | 0.00000                | -               | -     |
| 5    |          | 0.00                                 | 0.00000                | -               | -     |
| 6    |          | 0.00                                 | 0.00000                | -               | -     |
| 7    | a        | 8.25                                 | 0.10368                | YES             | YES   |
| 8    | a        | 12.80                                | 0.03774                | YES             | YES   |
| 9    | a        | 14.66                                | 0.04464                | YES             | YES   |
| 10   | a        | 16.87                                | 0.33786                | YES             | YES   |
| 11   | a        | 20.11                                | 0.68253                | YES             | YES   |
| 12   | a        | 20.64                                | 0.33130                | YES             | YES   |
| 13   | a        | 27.44                                | 0.02214                | YES             | YES   |
| 14   | a        | 30.41                                | 0.69285                | YES             | YES   |
| 15   | a        | 31.77                                | 0.48136                | YES             | YES   |
| 16   | a        | 40.05                                | 0.19350                | YES             | YES   |
| 17   | a        | 45.64                                | 0.49259                | YES             | YES   |
| 18   | a        | 52.12                                | 1.56908                | YES             | YES   |
| 19   | a        | 55.27                                | 0.06357                | YES             | YES   |
| 20   | a        | 58.90                                | 1.36898                | YES             | YES   |
| 21   | a        | 61.23                                | 0.57878                | YES             | YES   |
| 22   | a        | 65.37                                | 3.91281                | YES             | YES   |
| 23   | a        | 69.62                                | 0.90058                | YES             | YES   |
| 24   | a        | 72.83                                | 1.43005                | YES             | YES   |
| 25   | a        | 76.28                                | 0.67063                | YES             | YES   |
| 26   | a        | 81.46                                | 0.47924                | YES             | YES   |
| 27   | a        | 82.19                                | 0.68899                | YES             | YES   |
| 28   | a        | 84.24                                | 0.08962                | YES             | YES   |
| 29   | a        | 87.49                                | 1.32036                | YES             | YES   |
| 30   | a        | 89.02                                | 0.49685                | YES             | YES   |
| 31   | a        | 95.74                                | 2.83432                | YES             | YES   |
| 32   | a        | 104.04                               | 1.36213                | YES             | YES   |
| 33   | a        | 112.97                               | 0.85080                | YES             | YES   |
| 34   | a        | 117.58                               | 3.14174                | YES             | YES   |
| 35   | a        | 120.17                               | 6.49993                | YES             | YES   |

|    |   |        |          |     |     |
|----|---|--------|----------|-----|-----|
| 36 | a | 125.49 | 7.05260  | YES | YES |
| 37 | a | 129.47 | 8.56123  | YES | YES |
| 38 | a | 137.02 | 25.83530 | YES | YES |
| 39 | a | 138.56 | 4.30001  | YES | YES |
| 40 | a | 149.68 | 0.36582  | YES | YES |
| 41 | a | 157.38 | 3.63143  | YES | YES |
| 42 | a | 180.12 | 1.20019  | YES | YES |
| 43 | a | 197.95 | 0.12911  | YES | YES |
| 44 | a | 198.84 | 0.06105  | YES | YES |
| 45 | a | 203.53 | 0.48740  | YES | YES |
| 46 | a | 205.79 | 0.12740  | YES | YES |
| 47 | a | 240.86 | 38.52820 | YES | YES |
| 48 | a | 284.86 | 0.09482  | YES | YES |
| 49 | a | 286.23 | 1.02969  | YES | YES |
| 50 | a | 289.80 | 0.51535  | YES | YES |
| 51 | a | 293.25 | 2.03727  | YES | YES |
| 52 | a | 298.17 | 2.88415  | YES | YES |
| 53 | a | 299.40 | 1.26946  | YES | YES |
| 54 | a | 301.91 | 11.75610 | YES | YES |
| 55 | a | 305.10 | 3.30726  | YES | YES |
| 56 | a | 332.55 | 0.42992  | YES | YES |
| 57 | a | 348.63 | 0.48474  | YES | YES |
| 58 | a | 367.66 | 0.85590  | YES | YES |
| 59 | a | 379.15 | 1.46455  | YES | YES |
| 60 | a | 394.21 | 0.01623  | YES | YES |
| 61 | a | 409.45 | 0.01124  | YES | YES |
| 62 | a | 431.80 | 0.01151  | YES | YES |
| 63 | a | 432.04 | 0.05190  | YES | YES |
| 64 | a | 433.29 | 0.04361  | YES | YES |
| 65 | a | 433.69 | 0.09687  | YES | YES |
| 66 | a | 439.06 | 5.99227  | YES | YES |
| 67 | a | 440.21 | 0.31673  | YES | YES |
| 68 | a | 440.87 | 2.45738  | YES | YES |
| 69 | a | 442.06 | 0.09835  | YES | YES |
| 70 | a | 443.49 | 2.83676  | YES | YES |
| 71 | a | 443.98 | 0.02930  | YES | YES |
| 72 | a | 445.20 | 0.01294  | YES | YES |
| 73 | a | 532.73 | 1.92846  | YES | YES |
| 74 | a | 533.33 | 2.00200  | YES | YES |
| 75 | a | 533.74 | 3.32280  | YES | YES |
| 76 | a | 534.70 | 0.85502  | YES | YES |
| 77 | a | 537.46 | 4.94462  | YES | YES |
| 78 | a | 538.60 | 4.50592  | YES | YES |
| 79 | a | 539.24 | 0.94995  | YES | YES |
| 80 | a | 539.38 | 0.76584  | YES | YES |
| 81 | a | 548.27 | 2.04697  | YES | YES |
| 82 | a | 555.75 | 3.94094  | YES | YES |
| 83 | a | 556.80 | 53.54862 | YES | YES |
| 84 | a | 557.18 | 7.37191  | YES | YES |
| 85 | a | 558.10 | 18.75760 | YES | YES |
| 86 | a | 568.13 | 1.21435  | YES | YES |
| 87 | a | 570.01 | 0.37776  | YES | YES |
| 88 | a | 573.84 | 1.29645  | YES | YES |
| 89 | a | 580.35 | 1.12249  | YES | YES |
| 90 | a | 665.39 | 0.04924  | YES | YES |

|     |   |         |           |     |     |
|-----|---|---------|-----------|-----|-----|
| 91  | a | 667.18  | 0.05506   | YES | YES |
| 92  | a | 667.79  | 0.20970   | YES | YES |
| 93  | a | 670.09  | 0.03533   | YES | YES |
| 94  | a | 691.57  | 0.47711   | YES | YES |
| 95  | a | 745.92  | 30.20572  | YES | YES |
| 96  | a | 746.70  | 32.73657  | YES | YES |
| 97  | a | 748.89  | 150.61956 | YES | YES |
| 98  | a | 749.59  | 168.92380 | YES | YES |
| 99  | a | 750.88  | 140.05268 | YES | YES |
| 100 | a | 752.46  | 14.05212  | YES | YES |
| 101 | a | 752.85  | 32.52761  | YES | YES |
| 102 | a | 754.28  | 79.76607  | YES | YES |
| 103 | a | 793.64  | 1.28369   | YES | YES |
| 104 | a | 799.81  | 3.29087   | YES | YES |
| 105 | a | 813.78  | 1.28638   | YES | YES |
| 106 | a | 814.73  | 0.60547   | YES | YES |
| 107 | a | 815.53  | 24.53279  | YES | YES |
| 108 | a | 816.38  | 24.20661  | YES | YES |
| 109 | a | 837.94  | 0.09280   | YES | YES |
| 110 | a | 840.25  | 0.00479   | YES | YES |
| 111 | a | 840.51  | 0.27622   | YES | YES |
| 112 | a | 842.08  | 0.10510   | YES | YES |
| 113 | a | 932.51  | 3.67887   | YES | YES |
| 114 | a | 933.60  | 0.91464   | YES | YES |
| 115 | a | 933.81  | 2.05489   | YES | YES |
| 116 | a | 935.20  | 1.95409   | YES | YES |
| 117 | a | 955.27  | 0.29683   | YES | YES |
| 118 | a | 962.98  | 0.26605   | YES | YES |
| 119 | a | 973.29  | 4.71375   | YES | YES |
| 120 | a | 974.61  | 7.60396   | YES | YES |
| 121 | a | 981.52  | 0.07555   | YES | YES |
| 122 | a | 982.20  | 0.06408   | YES | YES |
| 123 | a | 982.96  | 0.02201   | YES | YES |
| 124 | a | 984.34  | 0.00373   | YES | YES |
| 125 | a | 998.98  | 2.04417   | YES | YES |
| 126 | a | 1000.80 | 0.61908   | YES | YES |
| 127 | a | 1016.67 | 3.81913   | YES | YES |
| 128 | a | 1017.10 | 0.69461   | YES | YES |
| 129 | a | 1017.79 | 7.20998   | YES | YES |
| 130 | a | 1017.88 | 2.51908   | YES | YES |
| 131 | a | 1026.54 | 2.08644   | YES | YES |
| 132 | a | 1026.79 | 1.61189   | YES | YES |
| 133 | a | 1027.62 | 4.36817   | YES | YES |
| 134 | a | 1051.50 | 18.33627  | YES | YES |
| 135 | a | 1052.29 | 13.72024  | YES | YES |
| 136 | a | 1074.24 | 0.72554   | YES | YES |
| 137 | a | 1074.43 | 1.75690   | YES | YES |
| 138 | a | 1076.56 | 4.89698   | YES | YES |
| 139 | a | 1077.98 | 26.90731  | YES | YES |
| 140 | a | 1078.32 | 1.11352   | YES | YES |
| 141 | a | 1079.26 | 27.08201  | YES | YES |
| 142 | a | 1080.87 | 50.95287  | YES | YES |
| 143 | a | 1134.62 | 5.05861   | YES | YES |
| 144 | a | 1136.49 | 1.57092   | YES | YES |
| 145 | a | 1139.20 | 10.32445  | YES | YES |

|     |   |         |           |     |     |
|-----|---|---------|-----------|-----|-----|
| 146 | a | 1141.06 | 6.00014   | YES | YES |
| 147 | a | 1141.21 | 5.31033   | YES | YES |
| 148 | a | 1141.42 | 0.10433   | YES | YES |
| 149 | a | 1141.54 | 4.16624   | YES | YES |
| 150 | a | 1143.49 | 20.68458  | YES | YES |
| 151 | a | 1230.64 | 1.34438   | YES | YES |
| 152 | a | 1231.70 | 67.33976  | YES | YES |
| 153 | a | 1237.97 | 383.35286 | YES | YES |
| 154 | a | 1244.25 | 49.86073  | YES | YES |
| 155 | a | 1244.77 | 1.14421   | YES | YES |
| 156 | a | 1244.89 | 8.83866   | YES | YES |
| 157 | a | 1245.53 | 6.30625   | YES | YES |
| 158 | a | 1246.29 | 83.69212  | YES | YES |
| 159 | a | 1252.31 | 0.60547   | YES | YES |
| 160 | a | 1301.95 | 3.66440   | YES | YES |
| 161 | a | 1316.67 | 0.66877   | YES | YES |
| 162 | a | 1359.55 | 0.77542   | YES | YES |
| 163 | a | 1359.75 | 2.32653   | YES | YES |
| 164 | a | 1365.18 | 3.77193   | YES | YES |
| 165 | a | 1368.59 | 6.90292   | YES | YES |
| 166 | a | 1369.37 | 16.48300  | YES | YES |
| 167 | a | 1375.35 | 3.31853   | YES | YES |
| 168 | a | 1378.84 | 1.91325   | YES | YES |
| 169 | a | 1379.77 | 7.35276   | YES | YES |
| 170 | a | 1380.04 | 2.22735   | YES | YES |
| 171 | a | 1380.69 | 1.66021   | YES | YES |
| 172 | a | 1384.39 | 0.09092   | YES | YES |
| 173 | a | 1389.56 | 7.65715   | YES | YES |
| 174 | a | 1401.08 | 0.08630   | YES | YES |
| 175 | a | 1405.59 | 0.03302   | YES | YES |
| 176 | a | 1416.98 | 9.97851   | YES | YES |
| 177 | a | 1419.18 | 69.75995  | YES | YES |
| 178 | a | 1425.21 | 4.11524   | YES | YES |
| 179 | a | 1434.25 | 1.75977   | YES | YES |
| 180 | a | 1439.08 | 0.65708   | YES | YES |
| 181 | a | 1443.33 | 49.52231  | YES | YES |
| 182 | a | 1449.35 | 61.85886  | YES | YES |
| 183 | a | 1456.42 | 12.84238  | YES | YES |
| 184 | a | 1457.02 | 2.88889   | YES | YES |
| 185 | a | 1457.59 | 15.10505  | YES | YES |
| 186 | a | 1457.71 | 3.77221   | YES | YES |
| 187 | a | 1458.11 | 2.29074   | YES | YES |
| 188 | a | 1466.70 | 10.79132  | YES | YES |
| 189 | a | 1476.75 | 4.45613   | YES | YES |
| 190 | a | 1488.19 | 15.18794  | YES | YES |
| 191 | a | 1489.47 | 120.88166 | YES | YES |
| 192 | a | 1489.92 | 542.04246 | YES | YES |
| 193 | a | 1494.13 | 191.06057 | YES | YES |
| 194 | a | 1553.02 | 0.03805   | YES | YES |
| 195 | a | 1556.38 | 0.20849   | YES | YES |
| 196 | a | 1605.87 | 0.27402   | YES | YES |
| 197 | a | 1606.13 | 0.06858   | YES | YES |
| 198 | a | 1607.19 | 0.18824   | YES | YES |
| 199 | a | 1608.32 | 0.99739   | YES | YES |
| 200 | a | 1632.84 | 13.16786  | YES | YES |

|     |   |         |          |     |     |
|-----|---|---------|----------|-----|-----|
| 201 | a | 1633.50 | 9.72745  | YES | YES |
| 202 | a | 1634.70 | 12.02043 | YES | YES |
| 203 | a | 1635.66 | 9.04771  | YES | YES |
| 204 | a | 2942.97 | 4.51416  | YES | YES |
| 205 | a | 2948.35 | 3.02387  | YES | YES |
| 206 | a | 2951.73 | 4.69667  | YES | YES |
| 207 | a | 2953.09 | 1.94930  | YES | YES |
| 208 | a | 2957.03 | 0.99779  | YES | YES |
| 209 | a | 2957.50 | 5.41310  | YES | YES |
| 210 | a | 3027.79 | 6.62398  | YES | YES |
| 211 | a | 3029.97 | 7.83777  | YES | YES |
| 212 | a | 3033.10 | 2.26764  | YES | YES |
| 213 | a | 3036.03 | 1.76437  | YES | YES |
| 214 | a | 3039.07 | 2.61883  | YES | YES |
| 215 | a | 3047.88 | 5.29761  | YES | YES |
| 216 | a | 3073.88 | 4.18960  | YES | YES |
| 217 | a | 3080.57 | 3.16833  | YES | YES |
| 218 | a | 3082.77 | 3.61285  | YES | YES |
| 219 | a | 3088.25 | 2.78801  | YES | YES |
| 220 | a | 3093.13 | 5.45378  | YES | YES |
| 221 | a | 3094.71 | 3.56064  | YES | YES |
| 222 | a | 3125.46 | 0.57056  | YES | YES |
| 223 | a | 3125.75 | 0.56891  | YES | YES |
| 224 | a | 3125.95 | 0.40281  | YES | YES |
| 225 | a | 3126.57 | 0.56824  | YES | YES |
| 226 | a | 3132.99 | 1.19990  | YES | YES |
| 227 | a | 3133.43 | 0.84394  | YES | YES |
| 228 | a | 3133.75 | 1.07875  | YES | YES |
| 229 | a | 3134.05 | 0.85697  | YES | YES |
| 230 | a | 3138.32 | 4.19927  | YES | YES |
| 231 | a | 3138.94 | 4.05184  | YES | YES |
| 232 | a | 3138.95 | 3.71559  | YES | YES |
| 233 | a | 3139.60 | 3.72728  | YES | YES |
| 234 | a | 3144.12 | 2.85284  | YES | YES |
| 235 | a | 3144.51 | 2.68263  | YES | YES |
| 236 | a | 3144.72 | 2.91258  | YES | YES |
| 237 | a | 3144.83 | 3.09223  | YES | YES |

Charge analysis by NBO, PABOON & QTAIM

| Atom | Charge (NBO) | Charge (PABOON) | Charge (QTAIM) |
|------|--------------|-----------------|----------------|
| 1 c  | -0.06666     | 0.0563          | -0.067601      |
| 2 c  | -0.07960     | 0.0213          | -0.083101      |
| 3 c  | -0.06316     | 0.0725          | -0.061692      |
| 4 c  | -0.07649     | 0.0704          | -0.074080      |
| 5 c  | -0.06574     | 0.0753          | -0.069643      |
| 6 c  | -0.07601     | 0.0286          | -0.072267      |
| 7 c  | -0.65913     | -0.1966         | -0.048158      |
| 8 h  | 0.25694      | 0.0541          | 0.067906       |
| 9 h  | 0.23524      | 0.0482          | 0.035231       |
| 10 h | 0.24688      | 0.0487          | 0.059194       |
| 11 c | -0.66701     | -0.1944         | -0.056742      |
| 12 h | 0.24017      | 0.0413          | 0.045083       |
| 13 h | 0.24011      | 0.0424          | 0.039907       |
| 14 h | 0.26426      | 0.0658          | 0.076400       |
| 15 c | -0.65847     | -0.1993         | -0.046570      |

|      |          |         |           |
|------|----------|---------|-----------|
| 16 h | 0.24584  | 0.0505  | 0.057781  |
| 17 h | 0.23483  | 0.0489  | 0.036874  |
| 18 h | 0.25571  | 0.0509  | 0.066224  |
| 19 c | -0.66667 | -0.1894 | -0.051137 |
| 20 h | 0.26451  | 0.0672  | 0.075665  |
| 21 h | 0.23748  | 0.0512  | 0.036954  |
| 22 h | 0.23743  | 0.0492  | 0.046848  |
| 23 c | -0.66134 | -0.1984 | -0.052111 |
| 24 h | 0.25450  | 0.0542  | 0.065336  |
| 25 h | 0.24917  | 0.0474  | 0.061299  |
| 26 h | 0.23858  | 0.0559  | 0.036058  |
| 27 c | -0.66523 | -0.2094 | -0.050075 |
| 28 h | 0.26313  | 0.0620  | 0.074027  |
| 29 h | 0.23850  | 0.0459  | 0.047491  |
| 30 h | 0.23600  | 0.0442  | 0.039837  |
| 31 c | 0.32678  | 0.2051  | 0.426127  |
| 32 c | 0.32220  | 0.2064  | 0.424791  |
| 33 c | -0.26045 | -0.0125 | -0.001068 |
| 34 h | 0.26532  | 0.0279  | 0.119174  |
| 35 c | -0.19697 | 0.0238  | -0.013373 |
| 36 h | 0.25747  | 0.0318  | 0.107877  |
| 37 c | -0.19877 | 0.0209  | -0.016861 |
| 38 h | 0.25834  | 0.0334  | 0.110318  |
| 39 c | -0.26489 | -0.0229 | -0.008066 |
| 40 h | 0.26418  | 0.0282  | 0.117752  |
| 41 f | -0.36693 | -0.2168 | -0.621410 |
| 42 f | -0.36455 | -0.1963 | -0.618652 |
| 43 c | 0.31762  | 0.1959  | 0.413730  |
| 44 c | 0.32855  | 0.2174  | 0.430025  |
| 45 c | -0.26154 | -0.0198 | -0.006935 |
| 46 h | 0.26620  | 0.0302  | 0.122771  |
| 47 c | -0.19716 | 0.0218  | -0.015176 |
| 48 h | 0.25861  | 0.0338  | 0.110729  |
| 49 c | -0.19627 | 0.0242  | -0.013384 |
| 50 h | 0.25748  | 0.0318  | 0.108602  |
| 51 c | -0.26286 | -0.0128 | -0.001476 |
| 52 h | 0.26416  | 0.0263  | 0.116284  |
| 53 f | -0.36689 | -0.2143 | -0.633773 |
| 54 f | -0.36531 | -0.1741 | -0.615245 |
| 55 c | 0.33033  | 0.2071  | 0.427061  |
| 56 c | 0.32282  | 0.2046  | 0.428081  |
| 57 c | -0.26157 | -0.0182 | -0.005302 |
| 58 h | 0.26469  | 0.0285  | 0.119185  |
| 59 c | -0.19854 | 0.0191  | -0.015261 |
| 60 h | 0.25766  | 0.0326  | 0.109370  |
| 61 c | -0.19710 | 0.0209  | -0.015195 |
| 62 h | 0.25865  | 0.0341  | 0.111416  |
| 63 c | -0.26413 | -0.0237 | -0.007255 |
| 64 h | 0.26402  | 0.0282  | 0.118429  |
| 65 f | -0.37019 | -0.2250 | -0.622087 |
| 66 f | -0.36573 | -0.2132 | -0.618880 |
| 67 c | 0.31667  | 0.1957  | 0.418354  |
| 68 c | 0.33091  | 0.2150  | 0.422986  |
| 69 c | -0.25899 | -0.0174 | -0.003978 |
| 70 h | 0.26609  | 0.0302  | 0.123267  |

|       |          |         |           |
|-------|----------|---------|-----------|
| 71 c  | -0.19379 | 0.0246  | -0.011890 |
| 72 h  | 0.25931  | 0.0351  | 0.113300  |
| 73 c  | -0.19551 | 0.0226  | -0.013278 |
| 74 h  | 0.25798  | 0.0329  | 0.110809  |
| 75 c  | -0.26296 | -0.0159 | -0.005198 |
| 76 h  | 0.26358  | 0.0264  | 0.117321  |
| 77 f  | -0.36693 | -0.2046 | -0.637922 |
| 78 f  | -0.37070 | -0.2121 | -0.619995 |
| 79 ba | 1.79533  | 1.4181  | 1.678964  |

F-Ca(HMB)oDFB<sub>2</sub>{f-al}

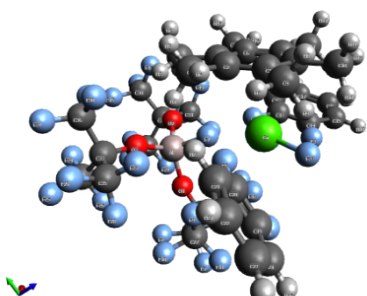

Atomic coordinates

|    |          |          |          |
|----|----------|----------|----------|
| Ca | -0.43405 | -1.00428 | 1.61655  |
| F  | -0.07355 | 0.02985  | -0.32367 |
| Al | 0.29743  | 0.26363  | -2.01001 |
| C  | 0.27480  | 2.24627  | 1.68135  |
| C  | -1.04482 | 2.05541  | 2.17920  |
| C  | -1.25171 | 1.22588  | 3.31753  |
| C  | -0.12851 | 0.66694  | 4.00236  |
| C  | 1.19704  | 0.89588  | 3.52885  |
| C  | 1.39489  | 1.68662  | 2.35707  |
| C  | 0.49943  | 3.06185  | 0.42956  |
| H  | 1.30911  | 2.64077  | -0.19654 |
| H  | 0.79603  | 4.10874  | 0.67691  |
| H  | -0.40352 | 3.11584  | -0.20432 |
| C  | -2.18819 | 2.74950  | 1.47046  |
| H  | -2.36807 | 2.32270  | 0.46088  |
| H  | -1.96164 | 3.82700  | 1.32342  |
| H  | -3.13575 | 2.69175  | 2.03836  |
| C  | -2.62988 | 0.88839  | 3.84491  |
| H  | -3.44384 | 1.26480  | 3.19898  |
| H  | -2.79097 | 1.30428  | 4.86529  |
| H  | -2.73989 | -0.21608 | 3.90723  |
| C  | -0.39866 | -0.16595 | 5.23771  |
| H  | -0.95354 | -1.08863 | 4.95284  |
| H  | -1.03392 | 0.39128  | 5.96060  |
| H  | 0.52288  | -0.46201 | 5.77198  |
| C  | 2.36435  | 0.32660  | 4.31515  |
| H  | 2.19974  | -0.73415 | 4.59474  |
| H  | 2.51337  | 0.88858  | 5.26578  |
| H  | 3.31928  | 0.36617  | 3.75937  |
| C  | 2.76654  | 1.97872  | 1.78796  |
| H  | 3.59157  | 1.55856  | 2.39281  |

|   |          |          |          |
|---|----------|----------|----------|
| H | 2.93796  | 3.07525  | 1.71533  |
| H | 2.86610  | 1.58099  | 0.75604  |
| C | 3.06218  | -1.62715 | 1.61617  |
| C | 2.57806  | -2.56125 | 2.53704  |
| C | 3.44096  | -3.29042 | 3.35158  |
| H | 3.02630  | -4.01549 | 4.06790  |
| C | 4.82331  | -3.05815 | 3.22848  |
| H | 5.52388  | -3.62328 | 3.86252  |
| C | 5.31018  | -2.11307 | 2.30820  |
| H | 6.39332  | -1.93615 | 2.22113  |
| C | 4.42808  | -1.38390 | 1.48993  |
| H | 4.77910  | -0.63831 | 0.76398  |
| F | 2.14344  | -0.94517 | 0.88472  |
| F | 1.22465  | -2.70354 | 2.63252  |
| C | -3.99584 | -2.30071 | 0.81058  |
| C | -3.85477 | -0.90595 | 0.81841  |
| C | -4.94989 | -0.05885 | 0.97065  |
| H | -4.79152 | 1.02872  | 0.94470  |
| C | -6.22565 | -0.62615 | 1.13400  |
| H | -7.10065 | 0.03140  | 1.25297  |
| C | -6.37961 | -2.02286 | 1.14200  |
| H | -7.37830 | -2.46836 | 1.27190  |
| C | -5.26519 | -2.86341 | 0.97835  |
| H | -5.35799 | -3.96017 | 0.97391  |
| F | -2.92030 | -3.07803 | 0.62805  |
| F | -2.60722 | -0.36928 | 0.66285  |
| O | 0.33200  | -1.33094 | -2.74159 |
| C | -0.10292 | -2.60265 | -2.61782 |
| C | 0.42582  | -3.41816 | -3.86196 |
| F | 1.74320  | -3.67716 | -3.72399 |
| F | -0.21800 | -4.59876 | -3.99545 |
| F | 0.25579  | -2.71030 | -4.98240 |
| C | -1.67671 | -2.65660 | -2.58910 |
| F | -2.13733 | -1.67290 | -1.78017 |
| F | -2.18444 | -2.44512 | -3.81278 |
| F | -2.14900 | -3.83064 | -2.12838 |
| C | 0.47496  | -3.26767 | -1.30938 |
| F | -0.21897 | -2.82207 | -0.18963 |
| F | 0.38349  | -4.60094 | -1.29833 |
| F | 1.74973  | -2.91511 | -1.11829 |
| O | 1.93972  | 0.90332  | -1.95850 |
| C | 3.02158  | 1.06550  | -2.76329 |
| C | 3.31070  | 2.60699  | -2.90635 |
| F | 2.40009  | 3.17277  | -3.72128 |
| F | 4.54052  | 2.85663  | -3.40123 |
| F | 3.21854  | 3.21235  | -1.70674 |
| C | 4.25138  | 0.34817  | -2.09993 |
| F | 3.90900  | -0.88496 | -1.68795 |
| F | 4.67085  | 1.03103  | -1.00094 |
| F | 5.30072  | 0.24203  | -2.93619 |
| C | 2.79447  | 0.44666  | -4.19885 |
| F | 2.99210  | -0.88482 | -4.19440 |
| F | 3.60660  | 0.98378  | -5.12719 |
| F | 1.51725  | 0.66918  | -4.57442 |
| O | -0.89448 | 1.39781  | -2.55038 |



|   |          |          |          |
|---|----------|----------|----------|
| C | -1.84233 | 1.98484  | -3.30860 |
| C | -1.62107 | 1.67254  | -4.83701 |
| F | -0.59684 | 2.39961  | -5.32559 |
| F | -2.71720 | 1.94696  | -5.57413 |
| F | -1.31762 | 0.37286  | -4.99735 |
| C | -3.26927 | 1.46423  | -2.88175 |
| F | -3.33884 | 1.35314  | -1.53752 |
| F | -3.50770 | 0.24280  | -3.39708 |
| F | -4.25812 | 2.28744  | -3.28258 |
| C | -1.76023 | 3.54097  | -3.07576 |
| F | -2.27907 | 3.86214  | -1.86299 |
| F | -2.43713 | 4.23813  | -4.00828 |
| F | -0.48197 | 3.94453  | -3.08379 |
| F | -1.60578 | -1.97924 | 2.92216  |

### Vibrational analysis

| mode | symmetry | wave number<br>cm <sup>**</sup> (-1) | IR intensity<br>km/mol | selection rules |       |
|------|----------|--------------------------------------|------------------------|-----------------|-------|
|      |          |                                      |                        | IR              | RAMAN |
| 1    |          | -0.00                                | 0.00000                | -               | -     |
| 2    |          | -0.00                                | 0.00000                | -               | -     |
| 3    |          | 0.00                                 | 0.00000                | -               | -     |
| 4    |          | 0.00                                 | 0.00000                | -               | -     |
| 5    |          | 0.00                                 | 0.00000                | -               | -     |
| 6    |          | 0.00                                 | 0.00000                | -               | -     |
| 7    | a        | 8.12                                 | 0.22432                | YES             | YES   |
| 8    | a        | 14.28                                | 0.27226                | YES             | YES   |
| 9    | a        | 18.06                                | 0.76283                | YES             | YES   |
| 10   | a        | 19.75                                | 1.34408                | YES             | YES   |
| 11   | a        | 21.25                                | 0.81353                | YES             | YES   |
| 12   | a        | 22.70                                | 0.34642                | YES             | YES   |
| 13   | a        | 24.17                                | 0.17037                | YES             | YES   |
| 14   | a        | 27.02                                | 0.31529                | YES             | YES   |
| 15   | a        | 28.42                                | 0.13337                | YES             | YES   |
| 16   | a        | 29.99                                | 0.03676                | YES             | YES   |
| 17   | a        | 33.92                                | 0.25916                | YES             | YES   |
| 18   | a        | 38.32                                | 0.75117                | YES             | YES   |
| 19   | a        | 40.57                                | 0.49536                | YES             | YES   |
| 20   | a        | 42.82                                | 0.54981                | YES             | YES   |
| 21   | a        | 44.42                                | 0.62319                | YES             | YES   |
| 22   | a        | 47.24                                | 0.99774                | YES             | YES   |
| 23   | a        | 48.78                                | 0.16622                | YES             | YES   |
| 24   | a        | 51.58                                | 0.62181                | YES             | YES   |
| 25   | a        | 55.50                                | 2.49974                | YES             | YES   |
| 26   | a        | 59.13                                | 0.43375                | YES             | YES   |
| 27   | a        | 62.19                                | 0.16060                | YES             | YES   |
| 28   | a        | 64.56                                | 1.48953                | YES             | YES   |
| 29   | a        | 67.84                                | 1.63699                | YES             | YES   |
| 30   | a        | 69.24                                | 0.70990                | YES             | YES   |
| 31   | a        | 71.22                                | 1.70676                | YES             | YES   |
| 32   | a        | 71.79                                | 0.33416                | YES             | YES   |
| 33   | a        | 74.14                                | 0.48348                | YES             | YES   |
| 34   | a        | 75.11                                | 0.11235                | YES             | YES   |
| 35   | a        | 75.83                                | 0.11755                | YES             | YES   |
| 36   | a        | 78.00                                | 0.44727                | YES             | YES   |

|    |   |        |          |     |     |
|----|---|--------|----------|-----|-----|
| 37 | a | 80.16  | 0.21693  | YES | YES |
| 38 | a | 83.81  | 2.00626  | YES | YES |
| 39 | a | 84.32  | 0.51089  | YES | YES |
| 40 | a | 86.70  | 0.20793  | YES | YES |
| 41 | a | 88.14  | 1.34063  | YES | YES |
| 42 | a | 90.99  | 0.56774  | YES | YES |
| 43 | a | 91.83  | 0.54327  | YES | YES |
| 44 | a | 93.81  | 0.64027  | YES | YES |
| 45 | a | 97.08  | 1.11997  | YES | YES |
| 46 | a | 102.58 | 2.89566  | YES | YES |
| 47 | a | 104.90 | 1.51324  | YES | YES |
| 48 | a | 116.31 | 3.36578  | YES | YES |
| 49 | a | 121.25 | 7.48985  | YES | YES |
| 50 | a | 129.31 | 0.50366  | YES | YES |
| 51 | a | 131.57 | 11.12188 | YES | YES |
| 52 | a | 139.36 | 55.92803 | YES | YES |
| 53 | a | 147.39 | 11.99173 | YES | YES |
| 54 | a | 151.78 | 1.08121  | YES | YES |
| 55 | a | 154.55 | 5.39176  | YES | YES |
| 56 | a | 156.37 | 0.50780  | YES | YES |
| 57 | a | 157.13 | 0.67508  | YES | YES |
| 58 | a | 157.59 | 2.04202  | YES | YES |
| 59 | a | 162.17 | 0.73196  | YES | YES |
| 60 | a | 166.49 | 0.87416  | YES | YES |
| 61 | a | 168.67 | 10.11283 | YES | YES |
| 62 | a | 171.38 | 32.99594 | YES | YES |
| 63 | a | 179.99 | 1.72715  | YES | YES |
| 64 | a | 181.56 | 4.81724  | YES | YES |
| 65 | a | 193.30 | 20.83165 | YES | YES |
| 66 | a | 197.77 | 4.75145  | YES | YES |
| 67 | a | 200.77 | 1.80085  | YES | YES |
| 68 | a | 206.43 | 5.61386  | YES | YES |
| 69 | a | 207.31 | 2.58547  | YES | YES |
| 70 | a | 210.32 | 2.90563  | YES | YES |
| 71 | a | 217.08 | 6.41446  | YES | YES |
| 72 | a | 219.64 | 12.86147 | YES | YES |
| 73 | a | 254.42 | 9.94697  | YES | YES |
| 74 | a | 261.66 | 0.65596  | YES | YES |
| 75 | a | 265.46 | 3.38664  | YES | YES |
| 76 | a | 272.50 | 1.87086  | YES | YES |
| 77 | a | 276.51 | 8.06041  | YES | YES |
| 78 | a | 279.96 | 2.58178  | YES | YES |
| 79 | a | 282.77 | 1.52659  | YES | YES |
| 80 | a | 284.60 | 0.02434  | YES | YES |
| 81 | a | 284.91 | 0.58463  | YES | YES |
| 82 | a | 286.14 | 1.09043  | YES | YES |
| 83 | a | 288.11 | 0.29245  | YES | YES |
| 84 | a | 293.58 | 0.42157  | YES | YES |
| 85 | a | 300.42 | 0.57251  | YES | YES |
| 86 | a | 303.55 | 5.64834  | YES | YES |
| 87 | a | 305.81 | 6.09503  | YES | YES |
| 88 | a | 307.29 | 9.51677  | YES | YES |
| 89 | a | 308.19 | 0.61745  | YES | YES |
| 90 | a | 314.19 | 0.88054  | YES | YES |
| 91 | a | 315.58 | 1.06644  | YES | YES |

|     |   |        |          |     |     |
|-----|---|--------|----------|-----|-----|
| 92  | a | 318.23 | 2.76938  | YES | YES |
| 93  | a | 319.54 | 1.10047  | YES | YES |
| 94  | a | 320.94 | 0.53487  | YES | YES |
| 95  | a | 327.59 | 0.95913  | YES | YES |
| 96  | a | 329.79 | 0.92479  | YES | YES |
| 97  | a | 334.77 | 4.04213  | YES | YES |
| 98  | a | 343.33 | 0.35600  | YES | YES |
| 99  | a | 345.98 | 0.83991  | YES | YES |
| 100 | a | 352.69 | 1.05350  | YES | YES |
| 101 | a | 354.00 | 1.79959  | YES | YES |
| 102 | a | 360.38 | 1.67130  | YES | YES |
| 103 | a | 365.12 | 9.65421  | YES | YES |
| 104 | a | 369.31 | 39.47896 | YES | YES |
| 105 | a | 376.46 | 1.57943  | YES | YES |
| 106 | a | 396.53 | 0.30278  | YES | YES |
| 107 | a | 402.18 | 35.97283 | YES | YES |
| 108 | a | 410.88 | 0.19769  | YES | YES |
| 109 | a | 436.64 | 0.02633  | YES | YES |
| 110 | a | 440.19 | 16.73962 | YES | YES |
| 111 | a | 440.24 | 40.75005 | YES | YES |
| 112 | a | 441.46 | 2.43920  | YES | YES |
| 113 | a | 443.62 | 0.59470  | YES | YES |
| 114 | a | 447.22 | 1.94521  | YES | YES |
| 115 | a | 450.57 | 0.25951  | YES | YES |
| 116 | a | 452.45 | 2.81281  | YES | YES |
| 117 | a | 454.22 | 41.34502 | YES | YES |
| 118 | a | 514.16 | 7.53213  | YES | YES |
| 119 | a | 516.59 | 1.56420  | YES | YES |
| 120 | a | 517.63 | 7.76400  | YES | YES |
| 121 | a | 518.31 | 1.48189  | YES | YES |
| 122 | a | 519.90 | 3.93910  | YES | YES |
| 123 | a | 520.82 | 3.66052  | YES | YES |
| 124 | a | 521.40 | 5.16445  | YES | YES |
| 125 | a | 523.95 | 0.84493  | YES | YES |
| 126 | a | 524.92 | 0.19444  | YES | YES |
| 127 | a | 526.90 | 1.59742  | YES | YES |
| 128 | a | 538.01 | 9.13205  | YES | YES |
| 129 | a | 539.39 | 83.23197 | YES | YES |
| 130 | a | 543.47 | 4.93007  | YES | YES |
| 131 | a | 546.30 | 0.58229  | YES | YES |
| 132 | a | 546.69 | 2.33716  | YES | YES |
| 133 | a | 550.45 | 12.83936 | YES | YES |
| 134 | a | 551.07 | 2.06804  | YES | YES |
| 135 | a | 551.40 | 6.74575  | YES | YES |
| 136 | a | 553.26 | 1.49706  | YES | YES |
| 137 | a | 553.60 | 1.58585  | YES | YES |
| 138 | a | 554.63 | 0.51728  | YES | YES |
| 139 | a | 555.27 | 0.48357  | YES | YES |
| 140 | a | 558.82 | 19.70551 | YES | YES |
| 141 | a | 560.99 | 12.23602 | YES | YES |
| 142 | a | 562.59 | 12.93713 | YES | YES |
| 143 | a | 563.34 | 6.82024  | YES | YES |
| 144 | a | 567.34 | 11.96179 | YES | YES |
| 145 | a | 570.65 | 1.12202  | YES | YES |
| 146 | a | 574.69 | 1.53913  | YES | YES |

|     |   |         |           |     |     |
|-----|---|---------|-----------|-----|-----|
| 147 | a | 586.57  | 0.31460   | YES | YES |
| 148 | a | 677.79  | 0.07276   | YES | YES |
| 149 | a | 682.27  | 0.41467   | YES | YES |
| 150 | a | 693.39  | 145.03410 | YES | YES |
| 151 | a | 694.73  | 0.99592   | YES | YES |
| 152 | a | 702.03  | 27.20898  | YES | YES |
| 153 | a | 706.40  | 19.74367  | YES | YES |
| 154 | a | 707.30  | 46.33856  | YES | YES |
| 155 | a | 707.65  | 14.95969  | YES | YES |
| 156 | a | 708.74  | 17.42864  | YES | YES |
| 157 | a | 710.88  | 110.62193 | YES | YES |
| 158 | a | 729.45  | 7.92267   | YES | YES |
| 159 | a | 735.59  | 2.50427   | YES | YES |
| 160 | a | 737.32  | 1.02709   | YES | YES |
| 161 | a | 741.52  | 69.29495  | YES | YES |
| 162 | a | 747.33  | 64.30898  | YES | YES |
| 163 | a | 760.46  | 73.78574  | YES | YES |
| 164 | a | 764.54  | 37.24540  | YES | YES |
| 165 | a | 790.63  | 0.22971   | YES | YES |
| 166 | a | 795.49  | 13.94530  | YES | YES |
| 167 | a | 802.44  | 5.76441   | YES | YES |
| 168 | a | 827.47  | 12.04490  | YES | YES |
| 169 | a | 830.58  | 35.25221  | YES | YES |
| 170 | a | 833.12  | 0.46477   | YES | YES |
| 171 | a | 834.01  | 14.62889  | YES | YES |
| 172 | a | 843.97  | 0.98330   | YES | YES |
| 173 | a | 861.11  | 19.11660  | YES | YES |
| 174 | a | 916.89  | 4.85295   | YES | YES |
| 175 | a | 929.04  | 1.79916   | YES | YES |
| 176 | a | 931.93  | 180.36385 | YES | YES |
| 177 | a | 951.26  | 2.84561   | YES | YES |
| 178 | a | 953.05  | 53.84645  | YES | YES |
| 179 | a | 956.04  | 47.64124  | YES | YES |
| 180 | a | 957.79  | 0.41685   | YES | YES |
| 181 | a | 960.92  | 301.62050 | YES | YES |
| 182 | a | 962.41  | 163.18782 | YES | YES |
| 183 | a | 963.11  | 210.09179 | YES | YES |
| 184 | a | 967.12  | 0.41542   | YES | YES |
| 185 | a | 968.47  | 4.42901   | YES | YES |
| 186 | a | 974.47  | 3.07455   | YES | YES |
| 187 | a | 983.36  | 24.80188  | YES | YES |
| 188 | a | 1003.94 | 4.74657   | YES | YES |
| 189 | a | 1008.46 | 1.43205   | YES | YES |
| 190 | a | 1020.72 | 6.15423   | YES | YES |
| 191 | a | 1024.19 | 8.97863   | YES | YES |
| 192 | a | 1026.40 | 0.71580   | YES | YES |
| 193 | a | 1032.26 | 1.44022   | YES | YES |
| 194 | a | 1034.89 | 0.65646   | YES | YES |
| 195 | a | 1047.57 | 14.56176  | YES | YES |
| 196 | a | 1049.59 | 27.02644  | YES | YES |
| 197 | a | 1054.07 | 11.28229  | YES | YES |
| 198 | a | 1075.35 | 0.07899   | YES | YES |
| 199 | a | 1077.61 | 1.66024   | YES | YES |
| 200 | a | 1084.58 | 2.48809   | YES | YES |
| 201 | a | 1086.67 | 8.54848   | YES | YES |

|     |   |         |            |     |     |
|-----|---|---------|------------|-----|-----|
| 202 | a | 1088.19 | 17.99225   | YES | YES |
| 203 | a | 1094.41 | 5.23090    | YES | YES |
| 204 | a | 1098.52 | 0.11129    | YES | YES |
| 205 | a | 1133.30 | 2.69454    | YES | YES |
| 206 | a | 1135.59 | 21.13700   | YES | YES |
| 207 | a | 1136.37 | 2.37993    | YES | YES |
| 208 | a | 1145.65 | 38.20754   | YES | YES |
| 209 | a | 1151.52 | 19.43894   | YES | YES |
| 210 | a | 1156.48 | 26.93284   | YES | YES |
| 211 | a | 1157.90 | 25.79367   | YES | YES |
| 212 | a | 1166.85 | 34.73975   | YES | YES |
| 213 | a | 1170.72 | 6.02376    | YES | YES |
| 214 | a | 1174.71 | 3.45687    | YES | YES |
| 215 | a | 1177.82 | 17.48424   | YES | YES |
| 216 | a | 1178.95 | 35.34504   | YES | YES |
| 217 | a | 1185.13 | 29.96229   | YES | YES |
| 218 | a | 1194.65 | 17.45615   | YES | YES |
| 219 | a | 1198.99 | 102.07985  | YES | YES |
| 220 | a | 1199.53 | 29.10114   | YES | YES |
| 221 | a | 1210.41 | 58.00333   | YES | YES |
| 222 | a | 1213.03 | 52.59846   | YES | YES |
| 223 | a | 1220.98 | 259.31670  | YES | YES |
| 224 | a | 1229.43 | 244.50082  | YES | YES |
| 225 | a | 1232.34 | 383.41860  | YES | YES |
| 226 | a | 1237.57 | 652.49976  | YES | YES |
| 227 | a | 1239.83 | 474.68030  | YES | YES |
| 228 | a | 1243.66 | 1091.83204 | YES | YES |
| 229 | a | 1244.18 | 69.13297   | YES | YES |
| 230 | a | 1248.86 | 140.46447  | YES | YES |
| 231 | a | 1250.73 | 893.34928  | YES | YES |
| 232 | a | 1251.27 | 144.13792  | YES | YES |
| 233 | a | 1256.77 | 476.89795  | YES | YES |
| 234 | a | 1259.29 | 450.11366  | YES | YES |
| 235 | a | 1261.52 | 188.10248  | YES | YES |
| 236 | a | 1266.81 | 103.45202  | YES | YES |
| 237 | a | 1276.01 | 92.34084   | YES | YES |
| 238 | a | 1304.27 | 0.51843    | YES | YES |
| 239 | a | 1313.83 | 0.28904    | YES | YES |
| 240 | a | 1325.08 | 112.94105  | YES | YES |
| 241 | a | 1345.24 | 159.08519  | YES | YES |
| 242 | a | 1346.85 | 1.99644    | YES | YES |
| 243 | a | 1353.42 | 0.75886    | YES | YES |
| 244 | a | 1359.76 | 5.25207    | YES | YES |
| 245 | a | 1360.83 | 10.81424   | YES | YES |
| 246 | a | 1368.07 | 3.40377    | YES | YES |
| 247 | a | 1371.34 | 73.70711   | YES | YES |
| 248 | a | 1376.76 | 167.26893  | YES | YES |
| 249 | a | 1379.09 | 2.08284    | YES | YES |
| 250 | a | 1382.38 | 0.34108    | YES | YES |
| 251 | a | 1391.95 | 0.77642    | YES | YES |
| 252 | a | 1397.36 | 3.12885    | YES | YES |
| 253 | a | 1408.92 | 2.11043    | YES | YES |
| 254 | a | 1417.88 | 14.63663   | YES | YES |
| 255 | a | 1418.87 | 1.40342    | YES | YES |
| 256 | a | 1423.05 | 1.94974    | YES | YES |

|     |   |         |           |     |     |
|-----|---|---------|-----------|-----|-----|
| 257 | a | 1430.90 | 34.14886  | YES | YES |
| 258 | a | 1433.64 | 9.91564   | YES | YES |
| 259 | a | 1442.83 | 34.35675  | YES | YES |
| 260 | a | 1447.32 | 14.68086  | YES | YES |
| 261 | a | 1448.68 | 4.38300   | YES | YES |
| 262 | a | 1456.90 | 9.76409   | YES | YES |
| 263 | a | 1459.37 | 8.00584   | YES | YES |
| 264 | a | 1463.70 | 4.96726   | YES | YES |
| 265 | a | 1469.39 | 41.46468  | YES | YES |
| 266 | a | 1475.77 | 12.39815  | YES | YES |
| 267 | a | 1503.64 | 258.21706 | YES | YES |
| 268 | a | 1511.34 | 183.00820 | YES | YES |
| 269 | a | 1557.65 | 0.57902   | YES | YES |
| 270 | a | 1565.99 | 0.53325   | YES | YES |
| 271 | a | 1614.34 | 8.74393   | YES | YES |
| 272 | a | 1616.70 | 1.52586   | YES | YES |
| 273 | a | 1633.37 | 21.70765  | YES | YES |
| 274 | a | 1633.98 | 16.75892  | YES | YES |
| 275 | a | 2937.86 | 12.85846  | YES | YES |
| 276 | a | 2941.64 | 29.06600  | YES | YES |
| 277 | a | 2942.74 | 13.87409  | YES | YES |
| 278 | a | 2947.96 | 17.42202  | YES | YES |
| 279 | a | 2959.49 | 13.18227  | YES | YES |
| 280 | a | 2967.49 | 10.28625  | YES | YES |
| 281 | a | 3011.71 | 7.02110   | YES | YES |
| 282 | a | 3017.47 | 1.90862   | YES | YES |
| 283 | a | 3026.25 | 8.88931   | YES | YES |
| 284 | a | 3030.38 | 5.86199   | YES | YES |
| 285 | a | 3038.78 | 5.20651   | YES | YES |
| 286 | a | 3052.56 | 1.06470   | YES | YES |
| 287 | a | 3072.83 | 1.94422   | YES | YES |
| 288 | a | 3073.68 | 6.45756   | YES | YES |
| 289 | a | 3081.32 | 35.47456  | YES | YES |
| 290 | a | 3084.30 | 6.21604   | YES | YES |
| 291 | a | 3086.65 | 23.76255  | YES | YES |
| 292 | a | 3103.66 | 1.92060   | YES | YES |
| 293 | a | 3111.42 | 1.81179   | YES | YES |
| 294 | a | 3116.35 | 2.13570   | YES | YES |
| 295 | a | 3124.65 | 9.55418   | YES | YES |
| 296 | a | 3128.90 | 5.43584   | YES | YES |
| 297 | a | 3134.13 | 1.43608   | YES | YES |
| 298 | a | 3138.44 | 0.35815   | YES | YES |
| 299 | a | 3143.96 | 0.09898   | YES | YES |
| 300 | a | 3160.99 | 10.43615  | YES | YES |

F-Sr(HMB)oDFB<sub>2</sub>{f-al}

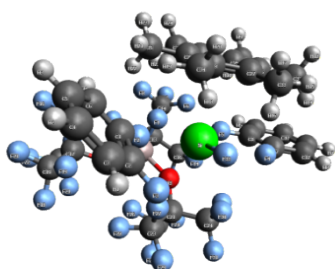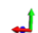

Atomic coordinates

|    |          |          |          |
|----|----------|----------|----------|
| Sr | -0.22826 | -0.44811 | -1.46908 |
| Al | 0.60074  | -1.02766 | 1.83886  |
| F  | 0.42651  | 0.36359  | 0.81577  |
| C  | 3.50848  | -0.23097 | -2.19738 |
| C  | 3.63535  | -1.09420 | -3.29612 |
| C  | 4.73855  | -0.95734 | -4.14844 |
| H  | 4.81661  | -1.63516 | -5.01227 |
| C  | 5.70948  | 0.02160  | -3.88154 |
| H  | 6.57543  | 0.12331  | -4.55435 |
| C  | 5.58396  | 0.85820  | -2.75949 |
| H  | 6.35240  | 1.61521  | -2.53903 |
| C  | 4.47513  | 0.72998  | -1.90640 |
| H  | 4.35198  | 1.35670  | -1.01359 |
| F  | 2.40849  | -0.33917 | -1.38896 |
| F  | 2.71837  | -2.03821 | -3.52006 |
| C  | -3.92418 | -0.60882 | -1.53982 |
| C  | -3.67356 | -0.15197 | -0.24297 |
| C  | -4.71532 | 0.14310  | 0.63374  |
| H  | -4.48446 | 0.48784  | 1.65087  |
| C  | -6.03469 | -0.02245 | 0.17659  |
| H  | -6.87170 | 0.20632  | 0.85419  |
| C  | -6.28932 | -0.48041 | -1.12866 |
| H  | -7.32617 | -0.60838 | -1.47619 |
| C  | -5.22786 | -0.78060 | -2.00111 |
| H  | -5.39458 | -1.13815 | -3.02826 |
| F  | -2.85421 | -0.86154 | -2.34085 |
| F  | -2.37465 | -0.00674 | 0.13132  |
| O  | -0.19736 | -0.91157 | 3.37307  |
| C  | -1.19882 | -0.43444 | 4.14829  |
| C  | -1.45480 | 1.09079  | 3.85601  |
| F  | -2.12660 | 1.23248  | 2.68012  |
| F  | -2.18202 | 1.69186  | 4.81436  |
| F  | -0.29113 | 1.74430  | 3.73100  |
| C  | -0.77632 | -0.61216 | 5.65567  |
| F  | -0.23607 | -1.82189 | 5.84476  |
| F  | 0.13979  | 0.31493  | 5.99761  |
| F  | -1.83531 | -0.48019 | 6.48488  |
| C  | -2.52170 | -1.24631 | 3.87402  |
| F  | -2.48546 | -2.44926 | 4.46944  |
| F  | -3.62611 | -0.59605 | 4.30461  |
| F  | -2.65845 | -1.45243 | 2.54620  |
| O  | 2.28093  | -1.48127 | 1.94463  |

|   |          |          |          |
|---|----------|----------|----------|
| C | 3.43721  | -1.11221 | 2.55488  |
| C | 3.59619  | 0.45285  | 2.53971  |
| F | 2.41716  | 1.03310  | 2.85771  |
| F | 4.52865  | 0.89781  | 3.39634  |
| F | 3.92584  | 0.89096  | 1.30016  |
| C | 4.62607  | -1.77182 | 1.76281  |
| F | 4.70311  | -3.08774 | 2.03333  |
| F | 4.43620  | -1.63682 | 0.43793  |
| F | 5.81136  | -1.20612 | 2.07577  |
| C | 3.45142  | -1.61945 | 4.04827  |
| F | 2.96280  | -2.86525 | 4.11610  |
| F | 4.69402  | -1.61672 | 4.57348  |
| F | 2.67305  | -0.82697 | 4.81712  |
| O | -0.17171 | -2.13628 | 0.63053  |
| C | -0.23581 | -3.49321 | 0.42940  |
| C | -0.35950 | -4.28608 | 1.77944  |
| F | -1.61039 | -4.22249 | 2.26919  |
| F | -0.03665 | -5.58215 | 1.62040  |
| F | 0.46888  | -3.74342 | 2.69200  |
| C | 1.06160  | -3.96000 | -0.34025 |
| F | 1.37634  | -3.01802 | -1.26601 |
| F | 2.10261  | -4.07278 | 0.49485  |
| F | 0.89447  | -5.12848 | -0.98001 |
| C | -1.50021 | -3.75652 | -0.45977 |
| F | -1.29045 | -3.19301 | -1.68994 |
| F | -1.76930 | -5.05345 | -0.63134 |
| F | -2.58495 | -3.15308 | 0.05425  |
| C | -1.95622 | 2.89203  | -1.06285 |
| C | -2.17667 | 2.46744  | -2.40663 |
| C | -1.06526 | 2.23214  | -3.26364 |
| C | 0.26930  | 2.39438  | -2.78103 |
| C | 0.48450  | 2.82651  | -1.44318 |
| C | -0.62881 | 3.06042  | -0.58688 |
| C | -3.10399 | 3.22610  | -0.12885 |
| H | -3.08988 | 4.30540  | 0.14420  |
| H | -3.03832 | 2.65580  | 0.82106  |
| H | -4.09710 | 3.01893  | -0.56763 |
| C | -3.57735 | 2.31154  | -2.97107 |
| H | -3.83994 | 3.16800  | -3.63428 |
| H | -4.35591 | 2.25505  | -2.18796 |
| H | -3.67148 | 1.39258  | -3.58363 |
| C | -1.24448 | 1.78110  | -4.69594 |
| H | -2.29658 | 1.80635  | -5.03470 |
| H | -0.86135 | 0.73740  | -4.79001 |
| H | -0.65789 | 2.41767  | -5.39373 |
| C | 1.40219  | 2.08756  | -3.73917 |
| H | 1.28460  | 1.05302  | -4.13068 |
| H | 2.40203  | 2.16173  | -3.27350 |
| H | 1.39066  | 2.77825  | -4.61258 |
| C | 1.86735  | 3.07361  | -0.88059 |
| H | 2.66193  | 2.97536  | -1.64224 |
| H | 2.09883  | 2.37139  | -0.05006 |
| H | 1.94368  | 4.09891  | -0.45639 |
| C | -0.35083 | 3.52419  | 0.82547  |
| H | 0.11425  | 4.53720  | 0.82962  |



|   |          |          |          |
|---|----------|----------|----------|
| H | 0.35812  | 2.83889  | 1.33350  |
| H | -1.25850 | 3.57652  | 1.45202  |
| F | 0.05202  | -0.82289 | -3.58645 |

### Vibrational analysis

| mode | symmetry | wave number<br>cm <sup>**</sup> (-1) | IR intensity<br>km/mol | selection rules |       |
|------|----------|--------------------------------------|------------------------|-----------------|-------|
|      |          |                                      |                        | IR              | RAMAN |
| 1    |          | -0.00                                | 0.00000                | -               | -     |
| 2    |          | 0.00                                 | 0.00000                | -               | -     |
| 3    |          | 0.00                                 | 0.00000                | -               | -     |
| 4    |          | 0.00                                 | 0.00000                | -               | -     |
| 5    |          | 0.00                                 | 0.00000                | -               | -     |
| 6    |          | 0.00                                 | 0.00000                | -               | -     |
| 7    | a        | 6.47                                 | 0.29257                | YES             | YES   |
| 8    | a        | 13.59                                | 0.59582                | YES             | YES   |
| 9    | a        | 17.39                                | 0.73553                | YES             | YES   |
| 10   | a        | 18.70                                | 0.34617                | YES             | YES   |
| 11   | a        | 22.44                                | 0.07457                | YES             | YES   |
| 12   | a        | 24.19                                | 0.05599                | YES             | YES   |
| 13   | a        | 25.07                                | 0.45310                | YES             | YES   |
| 14   | a        | 26.45                                | 0.03499                | YES             | YES   |
| 15   | a        | 29.17                                | 0.21553                | YES             | YES   |
| 16   | a        | 30.45                                | 0.32831                | YES             | YES   |
| 17   | a        | 31.87                                | 0.62427                | YES             | YES   |
| 18   | a        | 34.99                                | 0.17557                | YES             | YES   |
| 19   | a        | 36.30                                | 0.35604                | YES             | YES   |
| 20   | a        | 38.65                                | 1.31703                | YES             | YES   |
| 21   | a        | 42.82                                | 1.12924                | YES             | YES   |
| 22   | a        | 43.08                                | 0.56479                | YES             | YES   |
| 23   | a        | 46.65                                | 0.46399                | YES             | YES   |
| 24   | a        | 49.12                                | 3.23772                | YES             | YES   |
| 25   | a        | 51.87                                | 0.15207                | YES             | YES   |
| 26   | a        | 57.33                                | 1.05414                | YES             | YES   |
| 27   | a        | 58.02                                | 0.92130                | YES             | YES   |
| 28   | a        | 60.78                                | 0.50297                | YES             | YES   |
| 29   | a        | 62.26                                | 1.22115                | YES             | YES   |
| 30   | a        | 66.11                                | 1.10538                | YES             | YES   |
| 31   | a        | 67.71                                | 0.37740                | YES             | YES   |
| 32   | a        | 68.11                                | 0.01684                | YES             | YES   |
| 33   | a        | 70.15                                | 0.33360                | YES             | YES   |
| 34   | a        | 71.76                                | 2.19470                | YES             | YES   |
| 35   | a        | 72.85                                | 0.17183                | YES             | YES   |
| 36   | a        | 76.90                                | 0.76574                | YES             | YES   |
| 37   | a        | 77.95                                | 0.04432                | YES             | YES   |
| 38   | a        | 80.04                                | 0.40829                | YES             | YES   |
| 39   | a        | 81.62                                | 0.39619                | YES             | YES   |
| 40   | a        | 83.47                                | 1.57452                | YES             | YES   |
| 41   | a        | 83.98                                | 1.35663                | YES             | YES   |
| 42   | a        | 85.74                                | 0.39160                | YES             | YES   |
| 43   | a        | 90.16                                | 12.81200               | YES             | YES   |
| 44   | a        | 92.06                                | 3.83410                | YES             | YES   |
| 45   | a        | 94.19                                | 3.82276                | YES             | YES   |
| 46   | a        | 96.63                                | 5.54416                | YES             | YES   |
| 47   | a        | 103.40                               | 4.47397                | YES             | YES   |

|     |   |        |          |     |     |
|-----|---|--------|----------|-----|-----|
| 48  | a | 106.27 | 5.93255  | YES | YES |
| 49  | a | 109.94 | 0.66305  | YES | YES |
| 50  | a | 110.99 | 16.96167 | YES | YES |
| 51  | a | 127.24 | 19.35836 | YES | YES |
| 52  | a | 131.82 | 1.93173  | YES | YES |
| 53  | a | 142.52 | 1.94570  | YES | YES |
| 54  | a | 146.00 | 5.74452  | YES | YES |
| 55  | a | 154.54 | 14.49801 | YES | YES |
| 56  | a | 155.94 | 3.19684  | YES | YES |
| 57  | a | 158.38 | 0.22282  | YES | YES |
| 58  | a | 160.22 | 0.52166  | YES | YES |
| 59  | a | 164.21 | 3.05747  | YES | YES |
| 60  | a | 168.66 | 1.71626  | YES | YES |
| 61  | a | 169.73 | 1.55404  | YES | YES |
| 62  | a | 171.53 | 1.56313  | YES | YES |
| 63  | a | 178.40 | 1.83548  | YES | YES |
| 64  | a | 183.56 | 0.49894  | YES | YES |
| 65  | a | 193.84 | 5.74034  | YES | YES |
| 66  | a | 196.09 | 7.56771  | YES | YES |
| 67  | a | 196.60 | 17.61185 | YES | YES |
| 68  | a | 198.94 | 1.69401  | YES | YES |
| 69  | a | 201.40 | 0.87825  | YES | YES |
| 70  | a | 201.68 | 3.05524  | YES | YES |
| 71  | a | 231.53 | 1.00071  | YES | YES |
| 72  | a | 242.60 | 3.75811  | YES | YES |
| 73  | a | 263.35 | 10.52600 | YES | YES |
| 74  | a | 266.45 | 2.71457  | YES | YES |
| 75  | a | 270.48 | 5.25367  | YES | YES |
| 76  | a | 275.06 | 2.35418  | YES | YES |
| 77  | a | 277.96 | 2.18450  | YES | YES |
| 78  | a | 278.32 | 0.26412  | YES | YES |
| 79  | a | 282.15 | 2.09869  | YES | YES |
| 80  | a | 284.37 | 0.74963  | YES | YES |
| 81  | a | 285.34 | 0.13328  | YES | YES |
| 82  | a | 288.02 | 2.63238  | YES | YES |
| 83  | a | 291.99 | 2.78618  | YES | YES |
| 84  | a | 292.70 | 1.40302  | YES | YES |
| 85  | a | 294.64 | 0.35133  | YES | YES |
| 86  | a | 295.67 | 2.25948  | YES | YES |
| 87  | a | 306.78 | 1.03788  | YES | YES |
| 88  | a | 306.98 | 11.08218 | YES | YES |
| 89  | a | 308.56 | 5.13408  | YES | YES |
| 90  | a | 315.15 | 1.62777  | YES | YES |
| 91  | a | 319.06 | 1.72175  | YES | YES |
| 92  | a | 320.48 | 2.12264  | YES | YES |
| 93  | a | 321.65 | 1.13076  | YES | YES |
| 94  | a | 324.73 | 1.65381  | YES | YES |
| 95  | a | 327.42 | 0.67191  | YES | YES |
| 96  | a | 331.71 | 0.44448  | YES | YES |
| 97  | a | 332.03 | 0.82618  | YES | YES |
| 98  | a | 348.39 | 0.46232  | YES | YES |
| 99  | a | 348.67 | 1.12340  | YES | YES |
| 100 | a | 355.64 | 0.89719  | YES | YES |
| 101 | a | 359.37 | 6.32776  | YES | YES |
| 102 | a | 360.98 | 7.56327  | YES | YES |

|     |   |        |          |     |     |
|-----|---|--------|----------|-----|-----|
| 103 | a | 370.07 | 18.61246 | YES | YES |
| 104 | a | 370.93 | 13.55137 | YES | YES |
| 105 | a | 389.67 | 50.63860 | YES | YES |
| 106 | a | 393.19 | 1.08323  | YES | YES |
| 107 | a | 406.95 | 2.22842  | YES | YES |
| 108 | a | 408.49 | 5.15490  | YES | YES |
| 109 | a | 437.10 | 7.22133  | YES | YES |
| 110 | a | 437.85 | 1.60192  | YES | YES |
| 111 | a | 441.19 | 4.12678  | YES | YES |
| 112 | a | 443.02 | 77.78355 | YES | YES |
| 113 | a | 445.87 | 4.36318  | YES | YES |
| 114 | a | 449.43 | 2.23254  | YES | YES |
| 115 | a | 451.64 | 1.63117  | YES | YES |
| 116 | a | 453.20 | 42.53520 | YES | YES |
| 117 | a | 454.53 | 1.20064  | YES | YES |
| 118 | a | 468.49 | 26.36834 | YES | YES |
| 119 | a | 515.46 | 5.24318  | YES | YES |
| 120 | a | 516.79 | 4.14109  | YES | YES |
| 121 | a | 517.90 | 0.85979  | YES | YES |
| 122 | a | 518.71 | 5.22579  | YES | YES |
| 123 | a | 520.07 | 4.19182  | YES | YES |
| 124 | a | 520.73 | 5.10133  | YES | YES |
| 125 | a | 522.06 | 1.90282  | YES | YES |
| 126 | a | 524.07 | 0.54454  | YES | YES |
| 127 | a | 524.74 | 2.11808  | YES | YES |
| 128 | a | 527.64 | 1.35178  | YES | YES |
| 129 | a | 535.37 | 3.63390  | YES | YES |
| 130 | a | 543.22 | 3.53331  | YES | YES |
| 131 | a | 546.31 | 1.54337  | YES | YES |
| 132 | a | 546.82 | 9.81799  | YES | YES |
| 133 | a | 547.78 | 0.70760  | YES | YES |
| 134 | a | 552.51 | 2.41812  | YES | YES |
| 135 | a | 553.83 | 0.88888  | YES | YES |
| 136 | a | 554.05 | 0.28165  | YES | YES |
| 137 | a | 554.80 | 0.34851  | YES | YES |
| 138 | a | 555.67 | 0.79013  | YES | YES |
| 139 | a | 556.57 | 0.99571  | YES | YES |
| 140 | a | 559.47 | 0.06162  | YES | YES |
| 141 | a | 562.18 | 13.90308 | YES | YES |
| 142 | a | 563.82 | 22.97132 | YES | YES |
| 143 | a | 566.66 | 34.02892 | YES | YES |
| 144 | a | 567.60 | 1.26669  | YES | YES |
| 145 | a | 568.26 | 0.56917  | YES | YES |
| 146 | a | 580.39 | 0.21341  | YES | YES |
| 147 | a | 585.27 | 0.07524  | YES | YES |
| 148 | a | 681.29 | 0.02237  | YES | YES |
| 149 | a | 682.51 | 0.18861  | YES | YES |
| 150 | a | 687.69 | 94.10121 | YES | YES |
| 151 | a | 705.71 | 7.07607  | YES | YES |
| 152 | a | 706.35 | 27.98926 | YES | YES |
| 153 | a | 707.12 | 27.23705 | YES | YES |
| 154 | a | 708.09 | 0.04083  | YES | YES |
| 155 | a | 708.94 | 53.52108 | YES | YES |
| 156 | a | 709.56 | 30.38258 | YES | YES |
| 157 | a | 711.37 | 67.33923 | YES | YES |

|     |   |         |           |     |     |
|-----|---|---------|-----------|-----|-----|
| 158 | a | 726.20  | 10.90473  | YES | YES |
| 159 | a | 738.52  | 2.06359   | YES | YES |
| 160 | a | 739.31  | 11.98267  | YES | YES |
| 161 | a | 743.05  | 72.88029  | YES | YES |
| 162 | a | 746.10  | 80.28840  | YES | YES |
| 163 | a | 757.61  | 65.62598  | YES | YES |
| 164 | a | 764.01  | 45.56120  | YES | YES |
| 165 | a | 779.58  | 15.84401  | YES | YES |
| 166 | a | 789.47  | 0.31017   | YES | YES |
| 167 | a | 799.03  | 2.71355   | YES | YES |
| 168 | a | 828.21  | 19.07544  | YES | YES |
| 169 | a | 830.49  | 35.15286  | YES | YES |
| 170 | a | 833.84  | 9.50067   | YES | YES |
| 171 | a | 834.92  | 11.66804  | YES | YES |
| 172 | a | 841.58  | 0.59075   | YES | YES |
| 173 | a | 862.25  | 26.24354  | YES | YES |
| 174 | a | 918.17  | 10.74107  | YES | YES |
| 175 | a | 926.67  | 3.88584   | YES | YES |
| 176 | a | 949.64  | 0.12490   | YES | YES |
| 177 | a | 955.49  | 21.26738  | YES | YES |
| 178 | a | 956.39  | 19.82972  | YES | YES |
| 179 | a | 958.53  | 8.61241   | YES | YES |
| 180 | a | 959.98  | 165.94555 | YES | YES |
| 181 | a | 962.07  | 196.54337 | YES | YES |
| 182 | a | 964.48  | 2.58171   | YES | YES |
| 183 | a | 966.60  | 99.53946  | YES | YES |
| 184 | a | 966.99  | 106.42834 | YES | YES |
| 185 | a | 970.43  | 341.57613 | YES | YES |
| 186 | a | 972.77  | 6.01715   | YES | YES |
| 187 | a | 985.02  | 20.06850  | YES | YES |
| 188 | a | 1004.47 | 1.63321   | YES | YES |
| 189 | a | 1008.49 | 1.45654   | YES | YES |
| 190 | a | 1020.44 | 7.92991   | YES | YES |
| 191 | a | 1025.98 | 8.16953   | YES | YES |
| 192 | a | 1028.47 | 1.93974   | YES | YES |
| 193 | a | 1033.43 | 0.99015   | YES | YES |
| 194 | a | 1035.16 | 0.35527   | YES | YES |
| 195 | a | 1049.48 | 23.15694  | YES | YES |
| 196 | a | 1051.02 | 9.61872   | YES | YES |
| 197 | a | 1073.78 | 0.48518   | YES | YES |
| 198 | a | 1075.29 | 0.57477   | YES | YES |
| 199 | a | 1080.09 | 2.23740   | YES | YES |
| 200 | a | 1084.69 | 1.22131   | YES | YES |
| 201 | a | 1087.61 | 4.51742   | YES | YES |
| 202 | a | 1088.28 | 21.50733  | YES | YES |
| 203 | a | 1093.26 | 7.58874   | YES | YES |
| 204 | a | 1097.92 | 17.77349  | YES | YES |
| 205 | a | 1132.74 | 1.82606   | YES | YES |
| 206 | a | 1134.04 | 12.97830  | YES | YES |
| 207 | a | 1136.82 | 14.28484  | YES | YES |
| 208 | a | 1144.75 | 19.33167  | YES | YES |
| 209 | a | 1147.84 | 69.22934  | YES | YES |
| 210 | a | 1155.73 | 20.43727  | YES | YES |
| 211 | a | 1161.73 | 20.29138  | YES | YES |
| 212 | a | 1167.24 | 35.15692  | YES | YES |

|     |   |         |            |     |     |
|-----|---|---------|------------|-----|-----|
| 213 | a | 1171.89 | 6.01208    | YES | YES |
| 214 | a | 1174.69 | 63.72134   | YES | YES |
| 215 | a | 1178.79 | 112.12309  | YES | YES |
| 216 | a | 1184.63 | 27.14826   | YES | YES |
| 217 | a | 1186.89 | 31.10282   | YES | YES |
| 218 | a | 1190.59 | 11.46289   | YES | YES |
| 219 | a | 1194.80 | 27.30522   | YES | YES |
| 220 | a | 1202.62 | 22.54723   | YES | YES |
| 221 | a | 1205.87 | 77.10100   | YES | YES |
| 222 | a | 1212.39 | 76.93453   | YES | YES |
| 223 | a | 1219.52 | 166.95277  | YES | YES |
| 224 | a | 1224.87 | 255.16361  | YES | YES |
| 225 | a | 1233.59 | 1005.84540 | YES | YES |
| 226 | a | 1235.20 | 423.44890  | YES | YES |
| 227 | a | 1241.81 | 184.29584  | YES | YES |
| 228 | a | 1243.01 | 309.20735  | YES | YES |
| 229 | a | 1246.66 | 28.03860   | YES | YES |
| 230 | a | 1247.48 | 483.97336  | YES | YES |
| 231 | a | 1248.69 | 250.66109  | YES | YES |
| 232 | a | 1249.77 | 758.24558  | YES | YES |
| 233 | a | 1256.06 | 439.62059  | YES | YES |
| 234 | a | 1259.43 | 259.62631  | YES | YES |
| 235 | a | 1262.17 | 908.17425  | YES | YES |
| 236 | a | 1268.27 | 68.22182   | YES | YES |
| 237 | a | 1279.79 | 92.63907   | YES | YES |
| 238 | a | 1301.52 | 18.56476   | YES | YES |
| 239 | a | 1302.14 | 0.16023    | YES | YES |
| 240 | a | 1318.72 | 0.52137    | YES | YES |
| 241 | a | 1331.77 | 122.91334  | YES | YES |
| 242 | a | 1342.47 | 2.24348    | YES | YES |
| 243 | a | 1350.06 | 2.57697    | YES | YES |
| 244 | a | 1354.13 | 153.32312  | YES | YES |
| 245 | a | 1356.71 | 7.74063    | YES | YES |
| 246 | a | 1359.16 | 7.83706    | YES | YES |
| 247 | a | 1366.35 | 1.50165    | YES | YES |
| 248 | a | 1371.83 | 5.89779    | YES | YES |
| 249 | a | 1377.54 | 2.28260    | YES | YES |
| 250 | a | 1382.85 | 0.59583    | YES | YES |
| 251 | a | 1394.05 | 0.60805    | YES | YES |
| 252 | a | 1399.69 | 1.70630    | YES | YES |
| 253 | a | 1409.81 | 0.61929    | YES | YES |
| 254 | a | 1418.55 | 0.22976    | YES | YES |
| 255 | a | 1419.31 | 15.16888   | YES | YES |
| 256 | a | 1425.01 | 1.93401    | YES | YES |
| 257 | a | 1430.13 | 16.18581   | YES | YES |
| 258 | a | 1435.53 | 19.56393   | YES | YES |
| 259 | a | 1439.26 | 35.28009   | YES | YES |
| 260 | a | 1444.77 | 1.21861    | YES | YES |
| 261 | a | 1452.62 | 6.17591    | YES | YES |
| 262 | a | 1455.01 | 15.81272   | YES | YES |
| 263 | a | 1456.11 | 4.86473    | YES | YES |
| 264 | a | 1459.72 | 7.99338    | YES | YES |
| 265 | a | 1472.61 | 30.70596   | YES | YES |
| 266 | a | 1474.84 | 19.94782   | YES | YES |
| 267 | a | 1504.30 | 243.83053  | YES | YES |

|     |   |         |           |     |     |
|-----|---|---------|-----------|-----|-----|
| 268 | a | 1511.58 | 166.93965 | YES | YES |
| 269 | a | 1563.64 | 1.18077   | YES | YES |
| 270 | a | 1570.63 | 0.58866   | YES | YES |
| 271 | a | 1611.67 | 9.24802   | YES | YES |
| 272 | a | 1617.67 | 1.05384   | YES | YES |
| 273 | a | 1633.31 | 25.98876  | YES | YES |
| 274 | a | 1634.18 | 14.66644  | YES | YES |
| 275 | a | 2926.14 | 32.34327  | YES | YES |
| 276 | a | 2938.53 | 20.29799  | YES | YES |
| 277 | a | 2942.66 | 25.90657  | YES | YES |
| 278 | a | 2945.63 | 17.42305  | YES | YES |
| 279 | a | 2952.78 | 18.08442  | YES | YES |
| 280 | a | 2953.79 | 18.53879  | YES | YES |
| 281 | a | 3004.83 | 14.57217  | YES | YES |
| 282 | a | 3009.56 | 2.08578   | YES | YES |
| 283 | a | 3016.96 | 6.81763   | YES | YES |
| 284 | a | 3028.04 | 3.84124   | YES | YES |
| 285 | a | 3029.88 | 17.67250  | YES | YES |
| 286 | a | 3034.15 | 2.52949   | YES | YES |
| 287 | a | 3071.31 | 6.61043   | YES | YES |
| 288 | a | 3077.06 | 4.21439   | YES | YES |
| 289 | a | 3081.55 | 24.71005  | YES | YES |
| 290 | a | 3084.10 | 12.73421  | YES | YES |
| 291 | a | 3087.66 | 21.27317  | YES | YES |
| 292 | a | 3099.63 | 9.29796   | YES | YES |
| 293 | a | 3110.79 | 2.53071   | YES | YES |
| 294 | a | 3115.79 | 1.83968   | YES | YES |
| 295 | a | 3124.54 | 8.13045   | YES | YES |
| 296 | a | 3128.44 | 6.55354   | YES | YES |
| 297 | a | 3133.58 | 1.64825   | YES | YES |
| 298 | a | 3138.10 | 0.19241   | YES | YES |
| 299 | a | 3157.29 | 1.99739   | YES | YES |
| 300 | a | 3164.34 | 0.75483   | YES | YES |

F-Sr(HMB)oDFB<sub>2</sub>{*f-al*}

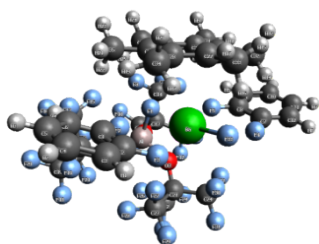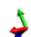

Atomic coordinates

|    |          |          |          |
|----|----------|----------|----------|
| Ba | 0.06490  | -1.11864 | -1.35708 |
| Al | -0.09932 | -0.14994 | 2.17220  |
| F  | -0.09032 | 0.71932  | 0.68594  |
| C  | 3.88019  | -0.59109 | -0.88379 |
| C  | 3.92304  | -1.64259 | -1.80675 |
| C  | 5.11915  | -1.99487 | -2.43243 |
| H  | 5.11907  | -2.82107 | -3.15926 |

|   |          |          |          |
|---|----------|----------|----------|
| C | 6.28282  | -1.27217 | -2.11597 |
| H | 7.23380  | -1.53831 | -2.60301 |
| C | 6.23704  | -0.21942 | -1.18504 |
| H | 7.15264  | 0.33962  | -0.93734 |
| C | 5.02811  | 0.12921  | -0.55740 |
| H | 4.96432  | 0.93923  | 0.18103  |
| F | 2.67472  | -0.28301 | -0.33201 |
| F | 2.76864  | -2.28839 | -2.09400 |
| C | -3.86515 | -1.59849 | -1.90393 |
| C | -3.78180 | -0.52452 | -1.01009 |
| C | -4.91533 | 0.18507  | -0.61852 |
| H | -4.81420 | 1.01321  | 0.09591  |
| C | -6.15850 | -0.19959 | -1.15173 |
| H | -7.06547 | 0.34815  | -0.85235 |
| C | -6.24784 | -1.27351 | -2.05484 |
| H | -7.22534 | -1.56736 | -2.46795 |
| C | -5.09564 | -1.98355 | -2.43756 |
| H | -5.13298 | -2.82789 | -3.14231 |
| F | -2.72168 | -2.23604 | -2.23797 |
| F | -2.54842 | -0.19145 | -0.54352 |
| O | -1.24774 | 0.44280  | 3.33756  |
| C | -2.43652 | 1.05805  | 3.54302  |
| C | -2.58184 | 2.32836  | 2.62365  |
| F | -2.88182 | 1.95161  | 1.34933  |
| F | -3.55328 | 3.16278  | 3.03693  |
| F | -1.42809 | 3.00770  | 2.57310  |
| C | -2.49843 | 1.50312  | 5.05286  |
| F | -2.04190 | 0.52449  | 5.84344  |
| F | -1.73262 | 2.59454  | 5.25162  |
| F | -3.76103 | 1.80500  | 5.42957  |
| C | -3.61732 | 0.05877  | 3.24085  |
| F | -3.77225 | -0.82406 | 4.24141  |
| F | -4.79668 | 0.69109  | 3.05121  |
| F | -3.33944 | -0.64102 | 2.11950  |
| O | 1.51537  | -0.27724 | 2.83238  |
| C | 2.43958  | 0.42528  | 3.53378  |
| C | 2.65764  | 1.84541  | 2.89214  |
| F | 1.46557  | 2.40007  | 2.59274  |
| F | 3.32794  | 2.69018  | 3.69267  |
| F | 3.34731  | 1.74656  | 1.72555  |
| C | 3.78589  | -0.38867 | 3.49063  |
| F | 3.73147  | -1.44331 | 4.32383  |
| F | 4.00517  | -0.86246 | 2.24864  |
| F | 4.84794  | 0.36979  | 3.83838  |
| C | 1.98835  | 0.60651  | 5.03559  |
| F | 1.45556  | -0.53229 | 5.49797  |
| F | 3.02111  | 0.95093  | 5.83417  |
| F | 1.05080  | 1.57303  | 5.13017  |
| O | -0.46061 | -1.75693 | 1.42394  |
| C | -0.42357 | -3.07046 | 1.80712  |
| C | -0.86279 | -3.26601 | 3.30385  |
| F | -2.19843 | -3.17264 | 3.42985  |
| F | -0.47724 | -4.46486 | 3.77987  |
| F | -0.30805 | -2.30372 | 4.06301  |
| C | 1.04116  | -3.62746 | 1.61559  |

|   |          |          |          |
|---|----------|----------|----------|
| F | 1.56340  | -3.11045 | 0.46195  |
| F | 1.84124  | -3.24744 | 2.61751  |
| F | 1.08412  | -4.96448 | 1.51145  |
| C | -1.41123 | -3.85171 | 0.86828  |
| F | -0.89733 | -3.86674 | -0.40010 |
| F | -1.61232 | -5.11772 | 1.24969  |
| F | -2.59476 | -3.22464 | 0.79706  |
| C | -1.06123 | 2.01911  | -2.56460 |
| C | -1.00707 | 1.09506  | -3.64807 |
| C | 0.25367  | 0.69283  | -4.17746 |
| C | 1.46253  | 1.12517  | -3.55852 |
| C | 1.40682  | 2.02366  | -2.45420 |
| C | 0.14645  | 2.46068  | -1.95700 |
| C | -2.37422 | 2.58720  | -2.06478 |
| H | -2.37133 | 3.69685  | -2.14713 |
| H | -2.54875 | 2.34581  | -0.99600 |
| H | -3.24654 | 2.22371  | -2.63921 |
| C | -2.26295 | 0.50816  | -4.26587 |
| H | -2.51166 | 0.99145  | -5.23934 |
| H | -3.15009 | 0.61774  | -3.61275 |
| H | -2.13302 | -0.57604 | -4.46512 |
| C | 0.29680  | -0.25337 | -5.35544 |
| H | -0.54298 | -0.07703 | -6.05791 |
| H | 0.21976  | -1.30000 | -4.96319 |
| H | 1.23531  | -0.15924 | -5.93627 |
| C | 2.77842  | 0.60628  | -4.10780 |
| H | 2.73115  | -0.48771 | -4.29128 |
| H | 3.62983  | 0.78638  | -3.42497 |
| H | 3.03160  | 1.08522  | -5.08190 |
| C | 2.65115  | 2.58649  | -1.80013 |
| H | 3.58786  | 2.24360  | -2.27724 |
| H | 2.70328  | 2.31952  | -0.72320 |
| H | 2.64650  | 3.69840  | -1.84725 |
| C | 0.11539  | 3.42758  | -0.79412 |
| H | 0.37536  | 4.46165  | -1.12325 |
| H | 0.84104  | 3.14024  | -0.00797 |
| H | -0.87304 | 3.46962  | -0.30263 |
| F | 0.04919  | -2.43268 | -3.25740 |

### Vibrational analysis

| mode | symmetry | wave number<br>cm <sup>**</sup> (-1) | IR intensity<br>km/mol | selection rules |       |
|------|----------|--------------------------------------|------------------------|-----------------|-------|
|      |          |                                      |                        | IR              | RAMAN |
| 1    |          | -0.00                                | 0.00000                | -               | -     |
| 2    |          | -0.00                                | 0.00000                | -               | -     |
| 3    |          | -0.00                                | 0.00000                | -               | -     |
| 4    |          | -0.00                                | 0.00000                | -               | -     |
| 5    |          | 0.00                                 | 0.00000                | -               | -     |
| 6    |          | 0.00                                 | 0.00000                | -               | -     |
| 7    | a        | 12.67                                | 0.03633                | YES             | YES   |
| 8    | a        | 19.46                                | 0.64607                | YES             | YES   |
| 9    | a        | 19.58                                | 0.55432                | YES             | YES   |
| 10   | a        | 20.73                                | 0.38668                | YES             | YES   |
| 11   | a        | 24.25                                | 0.24421                | YES             | YES   |
| 12   | a        | 25.54                                | 0.06153                | YES             | YES   |



|    |   |        |          |     |     |
|----|---|--------|----------|-----|-----|
| 13 | a | 27.85  | 0.03653  | YES | YES |
| 14 | a | 28.35  | 0.16383  | YES | YES |
| 15 | a | 30.77  | 0.04541  | YES | YES |
| 16 | a | 33.62  | 0.61310  | YES | YES |
| 17 | a | 34.79  | 0.11574  | YES | YES |
| 18 | a | 37.15  | 0.25499  | YES | YES |
| 19 | a | 38.99  | 0.98357  | YES | YES |
| 20 | a | 40.55  | 0.58705  | YES | YES |
| 21 | a | 42.86  | 0.78136  | YES | YES |
| 22 | a | 44.20  | 0.53658  | YES | YES |
| 23 | a | 45.66  | 0.89119  | YES | YES |
| 24 | a | 48.41  | 0.64567  | YES | YES |
| 25 | a | 50.62  | 0.52381  | YES | YES |
| 26 | a | 56.22  | 0.33845  | YES | YES |
| 27 | a | 58.27  | 0.77389  | YES | YES |
| 28 | a | 58.85  | 1.31445  | YES | YES |
| 29 | a | 60.70  | 0.97927  | YES | YES |
| 30 | a | 63.33  | 0.52912  | YES | YES |
| 31 | a | 65.68  | 1.07842  | YES | YES |
| 32 | a | 67.46  | 0.05993  | YES | YES |
| 33 | a | 71.18  | 0.06220  | YES | YES |
| 34 | a | 71.89  | 0.78300  | YES | YES |
| 35 | a | 72.05  | 0.28204  | YES | YES |
| 36 | a | 75.35  | 0.30380  | YES | YES |
| 37 | a | 77.65  | 0.33647  | YES | YES |
| 38 | a | 78.58  | 0.67386  | YES | YES |
| 39 | a | 80.68  | 0.61748  | YES | YES |
| 40 | a | 83.23  | 1.18343  | YES | YES |
| 41 | a | 84.22  | 0.78673  | YES | YES |
| 42 | a | 85.74  | 0.56226  | YES | YES |
| 43 | a | 91.42  | 1.55630  | YES | YES |
| 44 | a | 93.02  | 10.58023 | YES | YES |
| 45 | a | 95.15  | 0.27998  | YES | YES |
| 46 | a | 98.43  | 15.41469 | YES | YES |
| 47 | a | 99.48  | 0.44443  | YES | YES |
| 48 | a | 102.46 | 1.35749  | YES | YES |
| 49 | a | 103.70 | 3.27796  | YES | YES |
| 50 | a | 106.72 | 22.26351 | YES | YES |
| 51 | a | 115.14 | 4.21694  | YES | YES |
| 52 | a | 121.71 | 5.68466  | YES | YES |
| 53 | a | 141.11 | 1.76088  | YES | YES |
| 54 | a | 144.60 | 3.86178  | YES | YES |
| 55 | a | 154.30 | 0.21641  | YES | YES |
| 56 | a | 156.45 | 0.12067  | YES | YES |
| 57 | a | 160.37 | 0.56910  | YES | YES |
| 58 | a | 161.99 | 16.21918 | YES | YES |
| 59 | a | 162.88 | 2.87634  | YES | YES |
| 60 | a | 166.77 | 2.58279  | YES | YES |
| 61 | a | 170.70 | 1.78313  | YES | YES |
| 62 | a | 175.51 | 1.13675  | YES | YES |
| 63 | a | 176.42 | 1.10355  | YES | YES |
| 64 | a | 183.63 | 1.56863  | YES | YES |
| 65 | a | 188.38 | 0.07008  | YES | YES |
| 66 | a | 194.89 | 8.93603  | YES | YES |
| 67 | a | 195.18 | 1.25399  | YES | YES |

|     |   |        |          |     |     |
|-----|---|--------|----------|-----|-----|
| 68  | a | 195.91 | 0.06127  | YES | YES |
| 69  | a | 199.06 | 1.19137  | YES | YES |
| 70  | a | 200.07 | 1.46451  | YES | YES |
| 71  | a | 210.47 | 5.40005  | YES | YES |
| 72  | a | 227.29 | 15.86005 | YES | YES |
| 73  | a | 242.84 | 19.21458 | YES | YES |
| 74  | a | 250.77 | 5.14857  | YES | YES |
| 75  | a | 269.27 | 2.02829  | YES | YES |
| 76  | a | 273.80 | 2.77456  | YES | YES |
| 77  | a | 278.00 | 1.86183  | YES | YES |
| 78  | a | 282.39 | 2.51027  | YES | YES |
| 79  | a | 284.24 | 0.26347  | YES | YES |
| 80  | a | 285.27 | 0.25234  | YES | YES |
| 81  | a | 287.20 | 2.80744  | YES | YES |
| 82  | a | 291.42 | 0.85009  | YES | YES |
| 83  | a | 291.68 | 3.88675  | YES | YES |
| 84  | a | 292.19 | 2.26564  | YES | YES |
| 85  | a | 292.60 | 0.28927  | YES | YES |
| 86  | a | 297.17 | 4.37615  | YES | YES |
| 87  | a | 299.86 | 1.72321  | YES | YES |
| 88  | a | 306.40 | 7.53302  | YES | YES |
| 89  | a | 307.28 | 5.23275  | YES | YES |
| 90  | a | 313.51 | 2.13623  | YES | YES |
| 91  | a | 317.93 | 0.41600  | YES | YES |
| 92  | a | 320.18 | 2.43133  | YES | YES |
| 93  | a | 321.25 | 1.82345  | YES | YES |
| 94  | a | 324.56 | 1.10477  | YES | YES |
| 95  | a | 326.57 | 1.78245  | YES | YES |
| 96  | a | 328.89 | 0.17071  | YES | YES |
| 97  | a | 330.74 | 0.65509  | YES | YES |
| 98  | a | 348.17 | 0.87231  | YES | YES |
| 99  | a | 354.83 | 1.22078  | YES | YES |
| 100 | a | 357.40 | 1.45451  | YES | YES |
| 101 | a | 358.29 | 6.28226  | YES | YES |
| 102 | a | 360.48 | 6.45248  | YES | YES |
| 103 | a | 368.14 | 31.07626 | YES | YES |
| 104 | a | 371.34 | 0.63948  | YES | YES |
| 105 | a | 385.25 | 48.58125 | YES | YES |
| 106 | a | 400.04 | 0.09731  | YES | YES |
| 107 | a | 404.97 | 64.34296 | YES | YES |
| 108 | a | 407.65 | 19.43140 | YES | YES |
| 109 | a | 413.53 | 1.03439  | YES | YES |
| 110 | a | 435.96 | 0.22367  | YES | YES |
| 111 | a | 437.00 | 0.21053  | YES | YES |
| 112 | a | 442.78 | 0.07293  | YES | YES |
| 113 | a | 446.37 | 0.16209  | YES | YES |
| 114 | a | 449.27 | 0.40327  | YES | YES |
| 115 | a | 449.43 | 3.66235  | YES | YES |
| 116 | a | 450.06 | 1.64678  | YES | YES |
| 117 | a | 452.39 | 47.98757 | YES | YES |
| 118 | a | 463.62 | 32.82655 | YES | YES |
| 119 | a | 515.15 | 5.64390  | YES | YES |
| 120 | a | 516.33 | 3.35894  | YES | YES |
| 121 | a | 517.97 | 0.98467  | YES | YES |
| 122 | a | 519.05 | 4.93934  | YES | YES |

|     |   |        |           |     |     |
|-----|---|--------|-----------|-----|-----|
| 123 | a | 520.17 | 4.60891   | YES | YES |
| 124 | a | 520.68 | 4.59411   | YES | YES |
| 125 | a | 521.38 | 2.08273   | YES | YES |
| 126 | a | 524.13 | 0.29560   | YES | YES |
| 127 | a | 524.82 | 2.10800   | YES | YES |
| 128 | a | 527.30 | 1.10184   | YES | YES |
| 129 | a | 540.98 | 2.50309   | YES | YES |
| 130 | a | 542.46 | 2.99193   | YES | YES |
| 131 | a | 545.91 | 11.72468  | YES | YES |
| 132 | a | 547.15 | 0.59387   | YES | YES |
| 133 | a | 547.58 | 0.21843   | YES | YES |
| 134 | a | 552.37 | 2.95842   | YES | YES |
| 135 | a | 553.52 | 0.76165   | YES | YES |
| 136 | a | 553.90 | 0.51489   | YES | YES |
| 137 | a | 554.23 | 0.34776   | YES | YES |
| 138 | a | 555.11 | 0.41926   | YES | YES |
| 139 | a | 555.39 | 1.13590   | YES | YES |
| 140 | a | 562.12 | 33.51849  | YES | YES |
| 141 | a | 562.48 | 1.94256   | YES | YES |
| 142 | a | 562.82 | 13.14572  | YES | YES |
| 143 | a | 565.29 | 23.28622  | YES | YES |
| 144 | a | 566.22 | 0.13694   | YES | YES |
| 145 | a | 571.27 | 0.98984   | YES | YES |
| 146 | a | 580.88 | 0.83252   | YES | YES |
| 147 | a | 587.18 | 0.50050   | YES | YES |
| 148 | a | 681.06 | 0.11881   | YES | YES |
| 149 | a | 682.38 | 0.08402   | YES | YES |
| 150 | a | 703.00 | 27.92351  | YES | YES |
| 151 | a | 706.00 | 11.28489  | YES | YES |
| 152 | a | 706.79 | 36.93213  | YES | YES |
| 153 | a | 707.20 | 33.67436  | YES | YES |
| 154 | a | 709.00 | 36.60200  | YES | YES |
| 155 | a | 709.51 | 29.36176  | YES | YES |
| 156 | a | 709.59 | 0.46543   | YES | YES |
| 157 | a | 712.29 | 96.30851  | YES | YES |
| 158 | a | 727.50 | 7.09705   | YES | YES |
| 159 | a | 738.13 | 2.64930   | YES | YES |
| 160 | a | 742.61 | 14.04845  | YES | YES |
| 161 | a | 745.59 | 31.08003  | YES | YES |
| 162 | a | 746.17 | 123.95402 | YES | YES |
| 163 | a | 763.09 | 80.98031  | YES | YES |
| 164 | a | 765.32 | 30.70700  | YES | YES |
| 165 | a | 780.84 | 19.81413  | YES | YES |
| 166 | a | 793.55 | 0.11503   | YES | YES |
| 167 | a | 802.33 | 2.42067   | YES | YES |
| 168 | a | 829.15 | 33.52666  | YES | YES |
| 169 | a | 829.98 | 33.84450  | YES | YES |
| 170 | a | 830.81 | 6.03482   | YES | YES |
| 171 | a | 841.21 | 1.01140   | YES | YES |
| 172 | a | 841.36 | 0.67665   | YES | YES |
| 173 | a | 853.49 | 33.26929  | YES | YES |
| 174 | a | 925.68 | 4.43944   | YES | YES |
| 175 | a | 926.63 | 7.22569   | YES | YES |
| 176 | a | 950.80 | 39.40071  | YES | YES |
| 177 | a | 953.97 | 65.99729  | YES | YES |

|     |   |         |            |     |     |
|-----|---|---------|------------|-----|-----|
| 178 | a | 954.41  | 8.88889    | YES | YES |
| 179 | a | 959.37  | 146.01701  | YES | YES |
| 180 | a | 960.10  | 187.32563  | YES | YES |
| 181 | a | 964.56  | 8.64535    | YES | YES |
| 182 | a | 964.89  | 16.71911   | YES | YES |
| 183 | a | 966.62  | 165.79227  | YES | YES |
| 184 | a | 968.28  | 11.54525   | YES | YES |
| 185 | a | 968.61  | 320.42211  | YES | YES |
| 186 | a | 975.61  | 2.84030    | YES | YES |
| 187 | a | 984.12  | 19.07204   | YES | YES |
| 188 | a | 1005.15 | 1.67688    | YES | YES |
| 189 | a | 1008.07 | 0.24480    | YES | YES |
| 190 | a | 1021.14 | 8.96596    | YES | YES |
| 191 | a | 1022.23 | 9.65190    | YES | YES |
| 192 | a | 1029.75 | 2.61406    | YES | YES |
| 193 | a | 1034.97 | 0.27040    | YES | YES |
| 194 | a | 1036.90 | 6.86388    | YES | YES |
| 195 | a | 1052.73 | 17.24400   | YES | YES |
| 196 | a | 1055.04 | 8.26494    | YES | YES |
| 197 | a | 1075.69 | 0.01916    | YES | YES |
| 198 | a | 1076.65 | 0.28877    | YES | YES |
| 199 | a | 1077.30 | 5.32935    | YES | YES |
| 200 | a | 1085.79 | 2.75233    | YES | YES |
| 201 | a | 1087.28 | 0.03203    | YES | YES |
| 202 | a | 1087.66 | 10.81675   | YES | YES |
| 203 | a | 1093.36 | 2.70905    | YES | YES |
| 204 | a | 1096.80 | 27.97960   | YES | YES |
| 205 | a | 1133.01 | 39.21973   | YES | YES |
| 206 | a | 1134.57 | 2.99146    | YES | YES |
| 207 | a | 1135.00 | 10.23620   | YES | YES |
| 208 | a | 1138.24 | 22.30440   | YES | YES |
| 209 | a | 1144.34 | 64.74489   | YES | YES |
| 210 | a | 1154.40 | 17.04067   | YES | YES |
| 211 | a | 1159.65 | 21.80366   | YES | YES |
| 212 | a | 1171.75 | 20.35879   | YES | YES |
| 213 | a | 1173.68 | 25.37253   | YES | YES |
| 214 | a | 1175.39 | 23.37870   | YES | YES |
| 215 | a | 1178.24 | 94.04573   | YES | YES |
| 216 | a | 1183.64 | 26.26486   | YES | YES |
| 217 | a | 1188.45 | 39.48877   | YES | YES |
| 218 | a | 1190.32 | 3.11986    | YES | YES |
| 219 | a | 1196.32 | 34.66142   | YES | YES |
| 220 | a | 1203.25 | 17.18663   | YES | YES |
| 221 | a | 1208.36 | 116.63768  | YES | YES |
| 222 | a | 1213.08 | 68.08396   | YES | YES |
| 223 | a | 1220.16 | 243.44079  | YES | YES |
| 224 | a | 1223.81 | 233.41843  | YES | YES |
| 225 | a | 1230.99 | 194.06763  | YES | YES |
| 226 | a | 1234.31 | 1332.75964 | YES | YES |
| 227 | a | 1241.86 | 490.86330  | YES | YES |
| 228 | a | 1246.40 | 831.71299  | YES | YES |
| 229 | a | 1248.49 | 128.40490  | YES | YES |
| 230 | a | 1248.99 | 16.49629   | YES | YES |
| 231 | a | 1249.52 | 247.91133  | YES | YES |
| 232 | a | 1250.37 | 37.68951   | YES | YES |

|     |   |         |            |     |     |
|-----|---|---------|------------|-----|-----|
| 233 | a | 1256.54 | 345.80936  | YES | YES |
| 234 | a | 1261.26 | 1027.64853 | YES | YES |
| 235 | a | 1263.18 | 342.08917  | YES | YES |
| 236 | a | 1267.12 | 142.07506  | YES | YES |
| 237 | a | 1268.89 | 68.51859   | YES | YES |
| 238 | a | 1304.11 | 9.35272    | YES | YES |
| 239 | a | 1307.30 | 0.49713    | YES | YES |
| 240 | a | 1317.13 | 0.08020    | YES | YES |
| 241 | a | 1332.93 | 148.58835  | YES | YES |
| 242 | a | 1345.41 | 20.22914   | YES | YES |
| 243 | a | 1347.48 | 105.43763  | YES | YES |
| 244 | a | 1354.50 | 0.06532    | YES | YES |
| 245 | a | 1361.13 | 2.66513    | YES | YES |
| 246 | a | 1363.89 | 4.93658    | YES | YES |
| 247 | a | 1367.75 | 1.16658    | YES | YES |
| 248 | a | 1374.59 | 3.72978    | YES | YES |
| 249 | a | 1380.95 | 0.17825    | YES | YES |
| 250 | a | 1381.10 | 0.21816    | YES | YES |
| 251 | a | 1393.26 | 1.22696    | YES | YES |
| 252 | a | 1398.32 | 2.40802    | YES | YES |
| 253 | a | 1414.14 | 6.67327    | YES | YES |
| 254 | a | 1414.90 | 2.75392    | YES | YES |
| 255 | a | 1423.15 | 0.84871    | YES | YES |
| 256 | a | 1426.05 | 11.24288   | YES | YES |
| 257 | a | 1429.35 | 28.48668   | YES | YES |
| 258 | a | 1433.51 | 0.97257    | YES | YES |
| 259 | a | 1441.56 | 32.89334   | YES | YES |
| 260 | a | 1447.16 | 6.69394    | YES | YES |
| 261 | a | 1454.53 | 18.82428   | YES | YES |
| 262 | a | 1458.47 | 2.65637    | YES | YES |
| 263 | a | 1458.60 | 11.45396   | YES | YES |
| 264 | a | 1463.10 | 13.34451   | YES | YES |
| 265 | a | 1468.68 | 44.10575   | YES | YES |
| 266 | a | 1472.50 | 7.25489    | YES | YES |
| 267 | a | 1505.09 | 406.13125  | YES | YES |
| 268 | a | 1507.17 | 42.59677   | YES | YES |
| 269 | a | 1560.96 | 0.22390    | YES | YES |
| 270 | a | 1568.24 | 0.20332    | YES | YES |
| 271 | a | 1617.58 | 1.11255    | YES | YES |
| 272 | a | 1617.83 | 2.61596    | YES | YES |
| 273 | a | 1630.40 | 25.53975   | YES | YES |
| 274 | a | 1631.52 | 14.77699   | YES | YES |
| 275 | a | 2884.58 | 60.11936   | YES | YES |
| 276 | a | 2935.48 | 23.68503   | YES | YES |
| 277 | a | 2940.07 | 16.99884   | YES | YES |
| 278 | a | 2942.84 | 15.73132   | YES | YES |
| 279 | a | 2953.36 | 16.57123   | YES | YES |
| 280 | a | 2959.64 | 15.67329   | YES | YES |
| 281 | a | 3017.91 | 15.32164   | YES | YES |
| 282 | a | 3020.72 | 4.46854    | YES | YES |
| 283 | a | 3022.34 | 6.28608    | YES | YES |
| 284 | a | 3025.99 | 10.45170   | YES | YES |
| 285 | a | 3037.07 | 6.18395    | YES | YES |
| 286 | a | 3044.98 | 3.60560    | YES | YES |
| 287 | a | 3061.41 | 19.63749   | YES | YES |

|     |   |         |          |     |     |
|-----|---|---------|----------|-----|-----|
| 288 | a | 3066.10 | 2.93783  | YES | YES |
| 289 | a | 3071.58 | 4.93755  | YES | YES |
| 290 | a | 3081.91 | 28.12769 | YES | YES |
| 291 | a | 3082.45 | 7.90960  | YES | YES |
| 292 | a | 3097.52 | 4.47453  | YES | YES |
| 293 | a | 3113.87 | 2.13140  | YES | YES |
| 294 | a | 3114.30 | 2.09220  | YES | YES |
| 295 | a | 3126.99 | 7.82664  | YES | YES |
| 296 | a | 3127.30 | 7.17049  | YES | YES |
| 297 | a | 3137.05 | 0.29413  | YES | YES |
| 298 | a | 3137.45 | 0.25088  | YES | YES |
| 299 | a | 3159.10 | 2.12677  | YES | YES |
| 300 | a | 3165.08 | 2.68619  | YES | YES |

F-Ba(HMB)oDFB<sub>2</sub>{f-al}

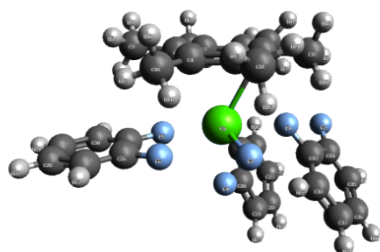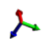

Atomic coordinates

|   |          |          |          |
|---|----------|----------|----------|
| C | 1.34197  | -0.35056 | -2.23739 |
| C | 1.76387  | -1.43932 | -1.41944 |
| C | 0.92315  | -2.58211 | -1.26370 |
| C | -0.39419 | -2.57650 | -1.80685 |
| C | -0.81736 | -1.48886 | -2.62639 |
| C | 0.04692  | -0.37641 | -2.83508 |
| C | 2.26542  | 0.82007  | -2.50840 |
| H | 2.33559  | 1.01340  | -3.59992 |
| H | 3.29449  | 0.63892  | -2.14760 |
| H | 1.90055  | 1.75853  | -2.03625 |
| C | 3.11556  | -1.41269 | -0.73503 |
| H | 3.14377  | -2.08077 | 0.14745  |
| H | 3.37266  | -0.39594 | -0.37812 |
| H | 3.92991  | -1.73883 | -1.42227 |
| C | 1.48001  | -3.81910 | -0.58600 |
| H | 0.88739  | -4.72245 | -0.82343 |
| H | 1.52567  | -3.73711 | 0.52253  |
| H | 2.51583  | -4.01370 | -0.93475 |
| C | -1.35762 | -3.71296 | -1.53234 |
| H | -1.41366 | -4.41823 | -2.39311 |
| H | -2.38292 | -3.32951 | -1.35508 |
| H | -1.06956 | -4.30265 | -0.64080 |
| C | -2.19671 | -1.48726 | -3.24019 |
| H | -2.58901 | -2.51059 | -3.39586 |
| H | -2.20727 | -0.97831 | -4.22417 |
| H | -2.89717 | -0.94334 | -2.56317 |
| C | -0.43736 | 0.77619  | -3.68673 |

|    |          |          |          |
|----|----------|----------|----------|
| H  | -0.45754 | 0.49170  | -4.76380 |
| H  | 0.19984  | 1.67402  | -3.59333 |
| H  | -1.47091 | 1.06953  | -3.40817 |
| C  | -0.96142 | 3.12883  | -0.53469 |
| C  | -0.21465 | 4.31258  | -0.49071 |
| C  | -0.82897 | 5.48791  | -0.04894 |
| H  | -0.23913 | 6.41658  | -0.01535 |
| C  | -2.18156 | 5.44975  | 0.33518  |
| H  | -2.66833 | 6.37534  | 0.68012  |
| C  | -2.91383 | 4.25052  | 0.27302  |
| H  | -3.97472 | 4.23371  | 0.56713  |
| C  | -2.30257 | 3.06339  | -0.17079 |
| H  | -2.81464 | 2.08579  | -0.23164 |
| F  | -0.29526 | 1.97987  | -0.92177 |
| F  | 1.07900  | 4.29068  | -0.86053 |
| C  | 1.23941  | 2.10688  | 1.66205  |
| C  | -0.03520 | 2.14555  | 2.23715  |
| C  | -0.46753 | 3.24560  | 2.97114  |
| H  | -1.48330 | 3.25289  | 3.39266  |
| C  | 0.42030  | 4.32534  | 3.12503  |
| H  | 0.09799  | 5.20931  | 3.69604  |
| C  | 1.70453  | 4.28588  | 2.55420  |
| H  | 2.38942  | 5.13846  | 2.67888  |
| C  | 2.12706  | 3.16857  | 1.81116  |
| H  | 3.11835  | 3.12168  | 1.33687  |
| F  | 1.56236  | 1.00704  | 0.90979  |
| F  | -0.86466 | 1.07654  | 2.01110  |
| C  | 0.29390  | -2.58404 | 2.45685  |
| C  | -0.99212 | -2.98696 | 2.08686  |
| C  | -1.54259 | -4.17170 | 2.56914  |
| H  | -2.55804 | -4.46451 | 2.26242  |
| C  | -0.76668 | -4.95324 | 3.44575  |
| H  | -1.18269 | -5.89278 | 3.84051  |
| C  | 0.52491  | -4.54355 | 3.82187  |
| H  | 1.12019  | -5.16206 | 4.51086  |
| C  | 1.07169  | -3.34511 | 3.32522  |
| H  | 2.08095  | -3.00300 | 3.59983  |
| F  | 0.76836  | -1.42255 | 1.90243  |
| F  | -1.67612 | -2.17859 | 1.22470  |
| Ca | -0.52907 | -0.31651 | -0.07664 |
| F  | -2.45668 | 0.04073  | -0.44951 |

#### Vibrational analysis

| mode | symmetry | wave number<br>cm**(-1) | IR intensity<br>km/mol | selection rules |       |
|------|----------|-------------------------|------------------------|-----------------|-------|
|      |          |                         |                        | IR              | RAMAN |
| 1    |          | -0.00                   | 0.00000                | -               | -     |
| 2    |          | 0.00                    | 0.00000                | -               | -     |
| 3    |          | 0.00                    | 0.00000                | -               | -     |
| 4    |          | 0.00                    | 0.00000                | -               | -     |
| 5    |          | 0.00                    | 0.00000                | -               | -     |
| 6    |          | 0.00                    | 0.00000                | -               | -     |
| 7    | a        | 9.66                    | 0.05739                | YES             | YES   |
| 8    | a        | 14.16                   | 0.87588                | YES             | YES   |
| 9    | a        | 22.63                   | 0.53912                | YES             | YES   |
| 10   | a        | 24.58                   | 0.17508                | YES             | YES   |

|    |   |        |          |     |     |
|----|---|--------|----------|-----|-----|
| 11 | a | 36.37  | 0.27180  | YES | YES |
| 12 | a | 43.76  | 0.35139  | YES | YES |
| 13 | a | 49.55  | 0.42378  | YES | YES |
| 14 | a | 50.37  | 1.02663  | YES | YES |
| 15 | a | 57.51  | 0.14541  | YES | YES |
| 16 | a | 64.40  | 0.18448  | YES | YES |
| 17 | a | 66.22  | 0.37606  | YES | YES |
| 18 | a | 70.36  | 0.91342  | YES | YES |
| 19 | a | 78.70  | 1.74277  | YES | YES |
| 20 | a | 83.45  | 0.02473  | YES | YES |
| 21 | a | 86.94  | 0.38941  | YES | YES |
| 22 | a | 91.16  | 0.42245  | YES | YES |
| 23 | a | 98.43  | 1.14380  | YES | YES |
| 24 | a | 103.04 | 2.33566  | YES | YES |
| 25 | a | 107.61 | 0.15726  | YES | YES |
| 26 | a | 118.15 | 0.57906  | YES | YES |
| 27 | a | 126.16 | 5.26699  | YES | YES |
| 28 | a | 129.47 | 1.11260  | YES | YES |
| 29 | a | 135.32 | 1.96926  | YES | YES |
| 30 | a | 140.13 | 2.75473  | YES | YES |
| 31 | a | 141.44 | 0.48758  | YES | YES |
| 32 | a | 156.23 | 11.04659 | YES | YES |
| 33 | a | 168.77 | 0.61587  | YES | YES |
| 34 | a | 181.54 | 2.65167  | YES | YES |
| 35 | a | 186.64 | 5.45969  | YES | YES |
| 36 | a | 189.85 | 31.68803 | YES | YES |
| 37 | a | 193.32 | 31.56570 | YES | YES |
| 38 | a | 198.43 | 1.32826  | YES | YES |
| 39 | a | 200.15 | 6.71857  | YES | YES |
| 40 | a | 207.91 | 26.26591 | YES | YES |
| 41 | a | 213.39 | 26.44234 | YES | YES |
| 42 | a | 256.55 | 73.58015 | YES | YES |
| 43 | a | 288.92 | 0.45641  | YES | YES |
| 44 | a | 290.37 | 0.26257  | YES | YES |
| 45 | a | 297.90 | 3.61511  | YES | YES |
| 46 | a | 300.77 | 1.49440  | YES | YES |
| 47 | a | 306.23 | 8.22816  | YES | YES |
| 48 | a | 308.06 | 1.99261  | YES | YES |
| 49 | a | 335.67 | 0.60885  | YES | YES |
| 50 | a | 345.47 | 1.12590  | YES | YES |
| 51 | a | 369.71 | 1.00105  | YES | YES |
| 52 | a | 379.96 | 1.93568  | YES | YES |
| 53 | a | 397.24 | 0.04012  | YES | YES |
| 54 | a | 405.72 | 0.03363  | YES | YES |
| 55 | a | 433.91 | 0.23235  | YES | YES |
| 56 | a | 435.58 | 1.13000  | YES | YES |
| 57 | a | 436.09 | 0.08221  | YES | YES |
| 58 | a | 440.23 | 0.21927  | YES | YES |
| 59 | a | 442.21 | 2.41284  | YES | YES |
| 60 | a | 442.60 | 2.79227  | YES | YES |
| 61 | a | 445.29 | 0.05606  | YES | YES |
| 62 | a | 446.19 | 0.39848  | YES | YES |
| 63 | a | 459.78 | 1.55263  | YES | YES |
| 64 | a | 535.25 | 2.15317  | YES | YES |
| 65 | a | 536.41 | 65.05326 | YES | YES |



|     |   |         |           |     |     |
|-----|---|---------|-----------|-----|-----|
| 66  | a | 540.17  | 15.50590  | YES | YES |
| 67  | a | 540.70  | 3.18947   | YES | YES |
| 68  | a | 542.98  | 2.44376   | YES | YES |
| 69  | a | 543.71  | 3.02571   | YES | YES |
| 70  | a | 545.13  | 0.25952   | YES | YES |
| 71  | a | 550.17  | 0.92639   | YES | YES |
| 72  | a | 558.15  | 22.35992  | YES | YES |
| 73  | a | 559.57  | 7.08122   | YES | YES |
| 74  | a | 561.44  | 9.73392   | YES | YES |
| 75  | a | 567.87  | 0.74915   | YES | YES |
| 76  | a | 572.05  | 4.16824   | YES | YES |
| 77  | a | 576.79  | 0.64437   | YES | YES |
| 78  | a | 584.05  | 1.04817   | YES | YES |
| 79  | a | 669.25  | 0.37036   | YES | YES |
| 80  | a | 680.52  | 0.05917   | YES | YES |
| 81  | a | 683.82  | 0.77702   | YES | YES |
| 82  | a | 695.94  | 0.13809   | YES | YES |
| 83  | a | 745.06  | 73.15021  | YES | YES |
| 84  | a | 748.24  | 70.77145  | YES | YES |
| 85  | a | 752.73  | 25.36753  | YES | YES |
| 86  | a | 755.33  | 138.00127 | YES | YES |
| 87  | a | 759.60  | 49.13350  | YES | YES |
| 88  | a | 761.70  | 49.63053  | YES | YES |
| 89  | a | 795.99  | 1.03634   | YES | YES |
| 90  | a | 802.20  | 2.17387   | YES | YES |
| 91  | a | 820.04  | 7.89617   | YES | YES |
| 92  | a | 822.29  | 11.92045  | YES | YES |
| 93  | a | 829.34  | 19.52184  | YES | YES |
| 94  | a | 833.36  | 1.92066   | YES | YES |
| 95  | a | 841.34  | 0.08123   | YES | YES |
| 96  | a | 865.44  | 0.25864   | YES | YES |
| 97  | a | 924.89  | 2.28113   | YES | YES |
| 98  | a | 929.84  | 3.23916   | YES | YES |
| 99  | a | 955.25  | 3.92136   | YES | YES |
| 100 | a | 960.89  | 1.19136   | YES | YES |
| 101 | a | 962.23  | 0.10477   | YES | YES |
| 102 | a | 972.02  | 0.10044   | YES | YES |
| 103 | a | 976.26  | 0.04783   | YES | YES |
| 104 | a | 978.34  | 16.49162  | YES | YES |
| 105 | a | 980.68  | 1.44607   | YES | YES |
| 106 | a | 995.60  | 4.68646   | YES | YES |
| 107 | a | 1001.70 | 0.52272   | YES | YES |
| 108 | a | 1005.37 | 0.40075   | YES | YES |
| 109 | a | 1016.55 | 4.37711   | YES | YES |
| 110 | a | 1018.16 | 3.12337   | YES | YES |
| 111 | a | 1022.98 | 12.19514  | YES | YES |
| 112 | a | 1027.04 | 3.02087   | YES | YES |
| 113 | a | 1031.44 | 3.66721   | YES | YES |
| 114 | a | 1033.32 | 1.54744   | YES | YES |
| 115 | a | 1054.05 | 10.72215  | YES | YES |
| 116 | a | 1056.40 | 23.62146  | YES | YES |
| 117 | a | 1076.87 | 1.34462   | YES | YES |
| 118 | a | 1077.96 | 9.26691   | YES | YES |
| 119 | a | 1080.89 | 10.28445  | YES | YES |
| 120 | a | 1082.81 | 11.55182  | YES | YES |

|     |   |         |           |     |     |
|-----|---|---------|-----------|-----|-----|
| 121 | a | 1083.78 | 2.21868   | YES | YES |
| 122 | a | 1084.49 | 23.34296  | YES | YES |
| 123 | a | 1136.20 | 2.79932   | YES | YES |
| 124 | a | 1138.42 | 1.95135   | YES | YES |
| 125 | a | 1138.94 | 2.18998   | YES | YES |
| 126 | a | 1148.96 | 4.73712   | YES | YES |
| 127 | a | 1154.75 | 15.47139  | YES | YES |
| 128 | a | 1158.49 | 71.01491  | YES | YES |
| 129 | a | 1243.02 | 179.82426 | YES | YES |
| 130 | a | 1245.84 | 1.07885   | YES | YES |
| 131 | a | 1246.42 | 39.13719  | YES | YES |
| 132 | a | 1248.31 | 6.67585   | YES | YES |
| 133 | a | 1251.13 | 73.28310  | YES | YES |
| 134 | a | 1253.11 | 5.19765   | YES | YES |
| 135 | a | 1267.64 | 54.34674  | YES | YES |
| 136 | a | 1305.71 | 0.73018   | YES | YES |
| 137 | a | 1319.88 | 0.27913   | YES | YES |
| 138 | a | 1349.02 | 7.96268   | YES | YES |
| 139 | a | 1361.24 | 5.75294   | YES | YES |
| 140 | a | 1361.75 | 3.16561   | YES | YES |
| 141 | a | 1366.77 | 4.53772   | YES | YES |
| 142 | a | 1368.72 | 6.41615   | YES | YES |
| 143 | a | 1373.32 | 4.26079   | YES | YES |
| 144 | a | 1378.23 | 1.14916   | YES | YES |
| 145 | a | 1380.77 | 2.42123   | YES | YES |
| 146 | a | 1381.81 | 1.42607   | YES | YES |
| 147 | a | 1391.50 | 1.15458   | YES | YES |
| 148 | a | 1396.41 | 5.93140   | YES | YES |
| 149 | a | 1408.16 | 1.52150   | YES | YES |
| 150 | a | 1410.57 | 0.87663   | YES | YES |
| 151 | a | 1415.63 | 45.66279  | YES | YES |
| 152 | a | 1422.61 | 6.50899   | YES | YES |
| 153 | a | 1433.31 | 1.80230   | YES | YES |
| 154 | a | 1435.15 | 7.55940   | YES | YES |
| 155 | a | 1440.38 | 5.74578   | YES | YES |
| 156 | a | 1450.34 | 31.86286  | YES | YES |
| 157 | a | 1453.38 | 12.86274  | YES | YES |
| 158 | a | 1453.71 | 40.83732  | YES | YES |
| 159 | a | 1458.00 | 7.93296   | YES | YES |
| 160 | a | 1459.27 | 9.05258   | YES | YES |
| 161 | a | 1462.03 | 7.42537   | YES | YES |
| 162 | a | 1464.53 | 10.18532  | YES | YES |
| 163 | a | 1476.75 | 8.24637   | YES | YES |
| 164 | a | 1493.91 | 266.99278 | YES | YES |
| 165 | a | 1497.67 | 142.11946 | YES | YES |
| 166 | a | 1504.64 | 199.94547 | YES | YES |
| 167 | a | 1558.61 | 0.23390   | YES | YES |
| 168 | a | 1560.91 | 1.21368   | YES | YES |
| 169 | a | 1607.88 | 7.19349   | YES | YES |
| 170 | a | 1611.71 | 0.42018   | YES | YES |
| 171 | a | 1613.75 | 1.18781   | YES | YES |
| 172 | a | 1632.87 | 11.42297  | YES | YES |
| 173 | a | 1633.23 | 12.46575  | YES | YES |
| 174 | a | 1634.77 | 13.55372  | YES | YES |
| 175 | a | 2942.69 | 8.80428   | YES | YES |

|     |   |         |          |     |     |
|-----|---|---------|----------|-----|-----|
| 176 | a | 2952.09 | 7.68820  | YES | YES |
| 177 | a | 2952.31 | 6.94937  | YES | YES |
| 178 | a | 2953.18 | 2.40677  | YES | YES |
| 179 | a | 2961.67 | 5.76924  | YES | YES |
| 180 | a | 2964.42 | 4.73544  | YES | YES |
| 181 | a | 3030.55 | 5.06062  | YES | YES |
| 182 | a | 3032.10 | 4.22186  | YES | YES |
| 183 | a | 3034.72 | 0.28271  | YES | YES |
| 184 | a | 3036.47 | 4.07556  | YES | YES |
| 185 | a | 3042.48 | 4.03425  | YES | YES |
| 186 | a | 3045.97 | 4.45760  | YES | YES |
| 187 | a | 3068.44 | 4.47644  | YES | YES |
| 188 | a | 3071.83 | 81.96209 | YES | YES |
| 189 | a | 3072.76 | 11.64031 | YES | YES |
| 190 | a | 3078.73 | 6.91722  | YES | YES |
| 191 | a | 3082.60 | 3.66349  | YES | YES |
| 192 | a | 3088.86 | 7.92527  | YES | YES |
| 193 | a | 3094.39 | 4.43912  | YES | YES |
| 194 | a | 3116.26 | 0.15476  | YES | YES |
| 195 | a | 3123.19 | 0.66086  | YES | YES |
| 196 | a | 3123.33 | 0.83037  | YES | YES |
| 197 | a | 3128.56 | 3.98225  | YES | YES |
| 198 | a | 3132.35 | 2.35982  | YES | YES |
| 199 | a | 3134.26 | 1.44391  | YES | YES |
| 200 | a | 3136.50 | 0.15644  | YES | YES |
| 201 | a | 3138.39 | 1.98116  | YES | YES |
| 202 | a | 3142.96 | 1.99708  | YES | YES |
| 203 | a | 3143.39 | 0.64113  | YES | YES |
| 204 | a | 3146.66 | 1.03824  | YES | YES |

[F-Ca(HMB)oDFB<sub>3</sub>]<sup>+</sup>

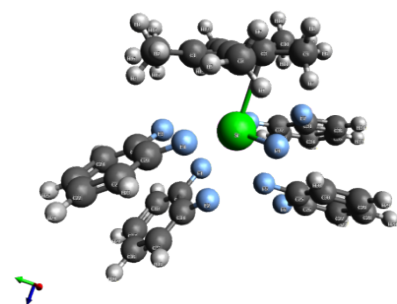

Atomic coordinates

|   |          |         |          |
|---|----------|---------|----------|
| C | 0.61493  | 2.57770 | -2.25986 |
| C | 1.53879  | 1.55763 | -2.62852 |
| C | 1.06428  | 0.31770 | -3.17023 |
| C | -0.33425 | 0.09131 | -3.31960 |
| C | -1.25430 | 1.06676 | -2.83244 |
| C | -0.78410 | 2.30665 | -2.32195 |
| C | 1.07314  | 3.96569 | -1.85863 |
| H | 0.68359  | 4.72080 | -2.57694 |
| H | 2.17283  | 4.06838 | -1.84930 |
| H | 0.70564  | 4.26816 | -0.85465 |
| C | 3.03744  | 1.72607 | -2.49295 |

|   |          |          |          |
|---|----------|----------|----------|
| H | 3.46193  | 0.90295  | -1.87802 |
| H | 3.32734  | 2.67719  | -2.01149 |
| H | 3.53859  | 1.68716  | -3.48565 |
| C | 2.10595  | -0.70490 | -3.57231 |
| H | 2.73835  | -0.96971 | -2.69666 |
| H | 2.78238  | -0.30093 | -4.35742 |
| H | 1.66889  | -1.64305 | -3.95787 |
| C | -0.88132 | -1.12726 | -4.03585 |
| H | -1.48121 | -0.81451 | -4.91892 |
| H | -1.55657 | -1.73595 | -3.39663 |
| H | -0.08711 | -1.79985 | -4.40545 |
| C | -2.74866 | 0.84026  | -2.92011 |
| H | -3.21205 | 1.51151  | -3.67926 |
| H | -3.25193 | 1.06628  | -1.95534 |
| H | -3.01355 | -0.19723 | -3.19426 |
| C | -1.80295 | 3.35038  | -1.91659 |
| H | -1.34669 | 4.25004  | -1.46525 |
| H | -2.53366 | 2.94543  | -1.18349 |
| H | -2.39741 | 3.68639  | -2.79653 |
| C | -1.19233 | 0.68726  | 3.12834  |
| C | 0.16311  | 0.81900  | 3.45348  |
| C | 0.56733  | 1.43722  | 4.63452  |
| H | 1.64133  | 1.53048  | 4.85407  |
| C | -0.42158 | 1.93211  | 5.50223  |
| H | -0.12036 | 2.42341  | 6.44006  |
| C | -1.78377 | 1.80149  | 5.17970  |
| H | -2.55297 | 2.18792  | 5.86599  |
| C | -2.17937 | 1.17469  | 3.98399  |
| H | -3.23855 | 1.05882  | 3.70821  |
| F | -1.51925 | 0.10701  | 1.93964  |
| F | 1.08674  | 0.36815  | 2.55407  |
| C | 0.16320  | 3.25246  | 1.60119  |
| C | 1.55670  | 3.14593  | 1.53712  |
| C | 2.36822  | 3.92743  | 2.35739  |
| H | 3.46201  | 3.82408  | 2.29309  |
| C | 1.75074  | 4.82567  | 3.24742  |
| H | 2.37746  | 5.45105  | 3.90169  |
| C | 0.34973  | 4.93087  | 3.30555  |
| H | -0.12249 | 5.63616  | 4.00629  |
| C | -0.46163 | 4.13802  | 2.47456  |
| H | -1.55996 | 4.18847  | 2.50637  |
| F | -0.56967 | 2.41920  | 0.79758  |
| F | 2.08539  | 2.23976  | 0.67162  |
| C | 0.63226  | -3.30721 | 1.45236  |
| C | -0.22734 | -4.31656 | 1.90479  |
| C | 0.17907  | -5.65071 | 1.80586  |
| H | -0.49899 | -6.44024 | 2.16407  |
| C | 1.43705  | -5.94453 | 1.24959  |
| H | 1.75882  | -6.99497 | 1.17279  |
| C | 2.28137  | -4.91432 | 0.79738  |
| H | 3.26421  | -5.15327 | 0.36242  |
| C | 1.88118  | -3.56923 | 0.89743  |
| H | 2.48234  | -2.71748 | 0.52474  |
| F | 0.17252  | -2.00726 | 1.52080  |
| F | -1.43084 | -3.98572 | 2.40352  |

|    |          |          |          |
|----|----------|----------|----------|
| C  | -0.66657 | -3.23652 | -1.29957 |
| C  | -1.82774 | -2.68557 | -0.74706 |
| C  | -2.92426 | -3.48169 | -0.42965 |
| H  | -3.81951 | -3.02523 | 0.01800  |
| C  | -2.83668 | -4.86234 | -0.68580 |
| H  | -3.69064 | -5.51060 | -0.43679 |
| C  | -1.67288 | -5.41495 | -1.24864 |
| H  | -1.61407 | -6.49715 | -1.44042 |
| C  | -0.57125 | -4.60018 | -1.56340 |
| H  | 0.36068  | -5.00657 | -1.98259 |
| F  | 0.37877  | -2.39619 | -1.53519 |
| F  | -1.83754 | -1.33384 | -0.50839 |
| Sr | 0.55119  | 0.01369  | -0.13727 |
| F  | 2.56054  | -0.75911 | -0.21095 |

### Vibrational analysis

| mode | symmetry | wave number<br>cm <sup>**</sup> (-1) | IR intensity<br>km/mol | selection rules |       |
|------|----------|--------------------------------------|------------------------|-----------------|-------|
|      |          |                                      |                        | IR              | RAMAN |
| 1    |          | -0.00                                | 0.00000                | -               | -     |
| 2    |          | -0.00                                | 0.00000                | -               | -     |
| 3    |          | 0.00                                 | 0.00000                | -               | -     |
| 4    |          | 0.00                                 | 0.00000                | -               | -     |
| 5    |          | 0.00                                 | 0.00000                | -               | -     |
| 6    |          | 0.00                                 | 0.00000                | -               | -     |
| 7    | a        | 15.33                                | 0.69057                | YES             | YES   |
| 8    | a        | 16.58                                | 0.31378                | YES             | YES   |
| 9    | a        | 19.62                                | 0.47694                | YES             | YES   |
| 10   | a        | 25.94                                | 0.28389                | YES             | YES   |
| 11   | a        | 29.84                                | 0.68123                | YES             | YES   |
| 12   | a        | 32.57                                | 0.21961                | YES             | YES   |
| 13   | a        | 37.59                                | 0.16876                | YES             | YES   |
| 14   | a        | 39.80                                | 0.12435                | YES             | YES   |
| 15   | a        | 43.90                                | 0.22317                | YES             | YES   |
| 16   | a        | 52.50                                | 0.34368                | YES             | YES   |
| 17   | a        | 53.80                                | 0.21586                | YES             | YES   |
| 18   | a        | 56.51                                | 0.91380                | YES             | YES   |
| 19   | a        | 58.06                                | 0.65425                | YES             | YES   |
| 20   | a        | 62.04                                | 0.25667                | YES             | YES   |
| 21   | a        | 64.97                                | 0.74549                | YES             | YES   |
| 22   | a        | 70.41                                | 0.24523                | YES             | YES   |
| 23   | a        | 72.14                                | 0.44242                | YES             | YES   |
| 24   | a        | 75.07                                | 0.20010                | YES             | YES   |
| 25   | a        | 76.39                                | 2.27811                | YES             | YES   |
| 26   | a        | 80.96                                | 0.65321                | YES             | YES   |
| 27   | a        | 84.33                                | 0.68808                | YES             | YES   |
| 28   | a        | 87.28                                | 0.44053                | YES             | YES   |
| 29   | a        | 88.87                                | 3.37792                | YES             | YES   |
| 30   | a        | 93.97                                | 1.79742                | YES             | YES   |
| 31   | a        | 95.20                                | 0.52155                | YES             | YES   |
| 32   | a        | 100.79                               | 3.98053                | YES             | YES   |
| 33   | a        | 110.47                               | 0.21260                | YES             | YES   |
| 34   | a        | 116.52                               | 17.70423               | YES             | YES   |
| 35   | a        | 122.42                               | 12.94897               | YES             | YES   |
| 36   | a        | 123.74                               | 25.40192               | YES             | YES   |

|    |   |        |          |     |     |
|----|---|--------|----------|-----|-----|
| 37 | a | 136.01 | 31.64804 | YES | YES |
| 38 | a | 138.56 | 0.36767  | YES | YES |
| 39 | a | 142.92 | 4.87269  | YES | YES |
| 40 | a | 149.05 | 54.62518 | YES | YES |
| 41 | a | 156.19 | 7.60895  | YES | YES |
| 42 | a | 197.41 | 1.88193  | YES | YES |
| 43 | a | 199.87 | 4.27145  | YES | YES |
| 44 | a | 201.66 | 9.26273  | YES | YES |
| 45 | a | 206.43 | 1.25961  | YES | YES |
| 46 | a | 211.61 | 0.78637  | YES | YES |
| 47 | a | 214.31 | 0.08899  | YES | YES |
| 48 | a | 219.87 | 0.91682  | YES | YES |
| 49 | a | 255.65 | 7.28356  | YES | YES |
| 50 | a | 288.75 | 0.51229  | YES | YES |
| 51 | a | 290.13 | 0.77376  | YES | YES |
| 52 | a | 294.63 | 2.34760  | YES | YES |
| 53 | a | 296.45 | 2.64010  | YES | YES |
| 54 | a | 297.39 | 5.51521  | YES | YES |
| 55 | a | 298.43 | 2.38928  | YES | YES |
| 56 | a | 304.30 | 0.86507  | YES | YES |
| 57 | a | 305.55 | 0.73525  | YES | YES |
| 58 | a | 326.43 | 0.52623  | YES | YES |
| 59 | a | 347.23 | 1.36783  | YES | YES |
| 60 | a | 366.08 | 0.63867  | YES | YES |
| 61 | a | 373.15 | 1.58375  | YES | YES |
| 62 | a | 389.57 | 0.03540  | YES | YES |
| 63 | a | 402.72 | 0.19244  | YES | YES |
| 64 | a | 433.74 | 0.09342  | YES | YES |
| 65 | a | 434.11 | 0.14073  | YES | YES |
| 66 | a | 435.30 | 0.02897  | YES | YES |
| 67 | a | 436.07 | 0.94509  | YES | YES |
| 68 | a | 436.58 | 0.76287  | YES | YES |
| 69 | a | 442.20 | 0.21191  | YES | YES |
| 70 | a | 443.64 | 4.57772  | YES | YES |
| 71 | a | 444.15 | 2.84360  | YES | YES |
| 72 | a | 447.25 | 0.03086  | YES | YES |
| 73 | a | 448.80 | 1.56530  | YES | YES |
| 74 | a | 450.64 | 58.11144 | YES | YES |
| 75 | a | 461.26 | 2.90626  | YES | YES |
| 76 | a | 535.97 | 1.91332  | YES | YES |
| 77 | a | 536.41 | 0.10944  | YES | YES |
| 78 | a | 537.40 | 4.91151  | YES | YES |
| 79 | a | 539.50 | 5.70744  | YES | YES |
| 80 | a | 543.58 | 1.12058  | YES | YES |
| 81 | a | 543.69 | 0.65736  | YES | YES |
| 82 | a | 543.78 | 1.72692  | YES | YES |
| 83 | a | 546.30 | 0.22014  | YES | YES |
| 84 | a | 552.96 | 1.49564  | YES | YES |
| 85 | a | 559.67 | 13.46647 | YES | YES |
| 86 | a | 559.72 | 6.23392  | YES | YES |
| 87 | a | 560.66 | 19.54886 | YES | YES |
| 88 | a | 561.81 | 1.25231  | YES | YES |
| 89 | a | 562.11 | 7.28683  | YES | YES |
| 90 | a | 572.43 | 0.19942  | YES | YES |
| 91 | a | 580.60 | 0.17790  | YES | YES |

|     |   |         |           |     |     |
|-----|---|---------|-----------|-----|-----|
| 92  | a | 585.93  | 0.02041   | YES | YES |
| 93  | a | 672.39  | 0.28095   | YES | YES |
| 94  | a | 672.81  | 0.34873   | YES | YES |
| 95  | a | 676.34  | 0.25689   | YES | YES |
| 96  | a | 679.44  | 0.34813   | YES | YES |
| 97  | a | 705.97  | 1.53988   | YES | YES |
| 98  | a | 744.57  | 38.89837  | YES | YES |
| 99  | a | 745.46  | 178.91931 | YES | YES |
| 100 | a | 749.30  | 1.46743   | YES | YES |
| 101 | a | 754.14  | 44.39079  | YES | YES |
| 102 | a | 755.78  | 11.54921  | YES | YES |
| 103 | a | 757.69  | 137.88035 | YES | YES |
| 104 | a | 760.82  | 10.74928  | YES | YES |
| 105 | a | 761.52  | 99.65564  | YES | YES |
| 106 | a | 789.84  | 0.56616   | YES | YES |
| 107 | a | 799.59  | 3.80913   | YES | YES |
| 108 | a | 822.67  | 5.99895   | YES | YES |
| 109 | a | 823.67  | 0.26348   | YES | YES |
| 110 | a | 825.95  | 17.95712  | YES | YES |
| 111 | a | 830.79  | 20.24898  | YES | YES |
| 112 | a | 834.83  | 1.11655   | YES | YES |
| 113 | a | 836.01  | 0.39431   | YES | YES |
| 114 | a | 838.92  | 0.33957   | YES | YES |
| 115 | a | 861.95  | 0.79926   | YES | YES |
| 116 | a | 924.61  | 2.94434   | YES | YES |
| 117 | a | 925.82  | 7.60889   | YES | YES |
| 118 | a | 927.09  | 0.78804   | YES | YES |
| 119 | a | 950.50  | 2.91333   | YES | YES |
| 120 | a | 951.53  | 7.26873   | YES | YES |
| 121 | a | 960.47  | 0.75700   | YES | YES |
| 122 | a | 970.60  | 4.05036   | YES | YES |
| 123 | a | 970.84  | 0.05673   | YES | YES |
| 124 | a | 971.41  | 0.20217   | YES | YES |
| 125 | a | 972.34  | 0.06690   | YES | YES |
| 126 | a | 983.06  | 15.10324  | YES | YES |
| 127 | a | 987.02  | 7.01019   | YES | YES |
| 128 | a | 1004.93 | 1.05293   | YES | YES |
| 129 | a | 1005.48 | 3.70240   | YES | YES |
| 130 | a | 1018.96 | 2.18691   | YES | YES |
| 131 | a | 1019.26 | 3.89439   | YES | YES |
| 132 | a | 1020.65 | 4.74565   | YES | YES |
| 133 | a | 1026.20 | 2.29881   | YES | YES |
| 134 | a | 1027.26 | 9.18714   | YES | YES |
| 135 | a | 1030.77 | 0.07814   | YES | YES |
| 136 | a | 1035.49 | 0.38446   | YES | YES |
| 137 | a | 1045.36 | 18.77988  | YES | YES |
| 138 | a | 1051.66 | 9.83996   | YES | YES |
| 139 | a | 1072.33 | 0.33057   | YES | YES |
| 140 | a | 1073.22 | 5.58497   | YES | YES |
| 141 | a | 1083.12 | 0.34629   | YES | YES |
| 142 | a | 1084.68 | 11.99400  | YES | YES |
| 143 | a | 1085.35 | 0.55769   | YES | YES |
| 144 | a | 1086.16 | 18.19938  | YES | YES |
| 145 | a | 1087.37 | 32.89247  | YES | YES |
| 146 | a | 1137.09 | 3.26104   | YES | YES |

|     |   |         |           |     |     |
|-----|---|---------|-----------|-----|-----|
| 147 | a | 1137.61 | 2.11656   | YES | YES |
| 148 | a | 1137.83 | 1.71271   | YES | YES |
| 149 | a | 1138.13 | 1.20556   | YES | YES |
| 150 | a | 1153.02 | 4.74113   | YES | YES |
| 151 | a | 1155.37 | 0.65911   | YES | YES |
| 152 | a | 1164.95 | 72.11969  | YES | YES |
| 153 | a | 1166.93 | 21.58276  | YES | YES |
| 154 | a | 1244.12 | 4.95307   | YES | YES |
| 155 | a | 1245.48 | 50.80528  | YES | YES |
| 156 | a | 1246.74 | 0.83971   | YES | YES |
| 157 | a | 1249.37 | 3.35116   | YES | YES |
| 158 | a | 1249.58 | 5.12214   | YES | YES |
| 159 | a | 1252.25 | 153.23514 | YES | YES |
| 160 | a | 1255.72 | 2.76147   | YES | YES |
| 161 | a | 1260.32 | 199.41025 | YES | YES |
| 162 | a | 1271.56 | 50.54662  | YES | YES |
| 163 | a | 1290.24 | 0.61744   | YES | YES |
| 164 | a | 1318.58 | 2.29563   | YES | YES |
| 165 | a | 1352.93 | 0.35267   | YES | YES |
| 166 | a | 1355.89 | 4.18734   | YES | YES |
| 167 | a | 1362.55 | 0.60326   | YES | YES |
| 168 | a | 1367.51 | 1.01647   | YES | YES |
| 169 | a | 1368.10 | 13.79993  | YES | YES |
| 170 | a | 1375.45 | 7.40437   | YES | YES |
| 171 | a | 1378.33 | 1.03493   | YES | YES |
| 172 | a | 1380.31 | 0.23329   | YES | YES |
| 173 | a | 1381.64 | 0.31400   | YES | YES |
| 174 | a | 1382.44 | 0.70376   | YES | YES |
| 175 | a | 1389.69 | 0.14149   | YES | YES |
| 176 | a | 1397.14 | 8.43758   | YES | YES |
| 177 | a | 1404.63 | 0.26207   | YES | YES |
| 178 | a | 1416.10 | 0.49703   | YES | YES |
| 179 | a | 1422.18 | 24.43147  | YES | YES |
| 180 | a | 1425.53 | 1.15766   | YES | YES |
| 181 | a | 1427.58 | 4.45007   | YES | YES |
| 182 | a | 1430.01 | 11.70298  | YES | YES |
| 183 | a | 1438.89 | 25.95702  | YES | YES |
| 184 | a | 1440.18 | 6.89522   | YES | YES |
| 185 | a | 1444.98 | 7.79764   | YES | YES |
| 186 | a | 1453.70 | 6.38790   | YES | YES |
| 187 | a | 1453.75 | 15.11777  | YES | YES |
| 188 | a | 1458.02 | 4.33769   | YES | YES |
| 189 | a | 1458.88 | 7.34721   | YES | YES |
| 190 | a | 1459.59 | 9.92938   | YES | YES |
| 191 | a | 1462.57 | 54.25683  | YES | YES |
| 192 | a | 1469.14 | 16.62566  | YES | YES |
| 193 | a | 1496.33 | 20.88743  | YES | YES |
| 194 | a | 1497.22 | 268.12048 | YES | YES |
| 195 | a | 1502.24 | 372.78542 | YES | YES |
| 196 | a | 1508.73 | 120.28010 | YES | YES |
| 197 | a | 1556.19 | 0.15960   | YES | YES |
| 198 | a | 1564.61 | 1.76001   | YES | YES |
| 199 | a | 1609.54 | 7.26157   | YES | YES |
| 200 | a | 1612.75 | 0.31291   | YES | YES |
| 201 | a | 1614.51 | 0.81372   | YES | YES |



|     |   |         |           |     |     |
|-----|---|---------|-----------|-----|-----|
| 202 | a | 1616.61 | 0.44311   | YES | YES |
| 203 | a | 1629.63 | 14.13797  | YES | YES |
| 204 | a | 1632.11 | 9.95386   | YES | YES |
| 205 | a | 1632.50 | 23.48476  | YES | YES |
| 206 | a | 1633.22 | 8.63354   | YES | YES |
| 207 | a | 2944.76 | 18.45047  | YES | YES |
| 208 | a | 2948.14 | 6.07204   | YES | YES |
| 209 | a | 2950.66 | 17.62048  | YES | YES |
| 210 | a | 2951.84 | 2.35882   | YES | YES |
| 211 | a | 2957.17 | 13.31134  | YES | YES |
| 212 | a | 2957.46 | 13.30103  | YES | YES |
| 213 | a | 3010.09 | 17.71563  | YES | YES |
| 214 | a | 3014.88 | 0.63406   | YES | YES |
| 215 | a | 3019.17 | 3.26040   | YES | YES |
| 216 | a | 3020.10 | 7.39027   | YES | YES |
| 217 | a | 3021.16 | 8.91856   | YES | YES |
| 218 | a | 3022.74 | 0.69380   | YES | YES |
| 219 | a | 3046.33 | 112.22574 | YES | YES |
| 220 | a | 3085.45 | 0.49951   | YES | YES |
| 221 | a | 3085.84 | 5.51103   | YES | YES |
| 222 | a | 3088.75 | 9.25027   | YES | YES |
| 223 | a | 3089.44 | 17.65615  | YES | YES |
| 224 | a | 3095.10 | 12.11742  | YES | YES |
| 225 | a | 3096.60 | 17.40803  | YES | YES |
| 226 | a | 3114.30 | 0.51542   | YES | YES |
| 227 | a | 3119.70 | 0.85514   | YES | YES |
| 228 | a | 3120.98 | 0.87867   | YES | YES |
| 229 | a | 3121.91 | 0.75022   | YES | YES |
| 230 | a | 3127.47 | 4.12686   | YES | YES |
| 231 | a | 3129.92 | 2.08371   | YES | YES |
| 232 | a | 3131.36 | 2.79115   | YES | YES |
| 233 | a | 3132.90 | 2.27699   | YES | YES |
| 234 | a | 3135.50 | 0.30669   | YES | YES |
| 235 | a | 3136.59 | 0.74217   | YES | YES |
| 236 | a | 3138.22 | 1.46283   | YES | YES |
| 237 | a | 3141.16 | 0.91087   | YES | YES |
| 238 | a | 3142.29 | 0.53716   | YES | YES |
| 239 | a | 3143.20 | 0.39845   | YES | YES |
| 240 | a | 3145.92 | 0.98689   | YES | YES |

[F-Sr(HMB)oDFB<sub>3</sub>]<sup>+</sup>

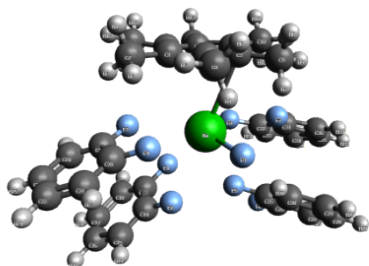

Atomic coordinates

C            0.61493            2.57770            -2.25986

|   |          |          |          |
|---|----------|----------|----------|
| C | 1.53879  | 1.55763  | -2.62852 |
| C | 1.06428  | 0.31770  | -3.17023 |
| C | -0.33425 | 0.09131  | -3.31960 |
| C | -1.25430 | 1.06676  | -2.83244 |
| C | -0.78410 | 2.30665  | -2.32195 |
| C | 1.07314  | 3.96569  | -1.85863 |
| H | 0.68359  | 4.72080  | -2.57694 |
| H | 2.17283  | 4.06838  | -1.84930 |
| H | 0.70564  | 4.26816  | -0.85465 |
| C | 3.03744  | 1.72607  | -2.49295 |
| H | 3.46193  | 0.90295  | -1.87802 |
| H | 3.32734  | 2.67719  | -2.01149 |
| H | 3.53859  | 1.68716  | -3.48565 |
| C | 2.10595  | -0.70490 | -3.57231 |
| H | 2.73835  | -0.96971 | -2.69666 |
| H | 2.78238  | -0.30093 | -4.35742 |
| H | 1.66889  | -1.64305 | -3.95787 |
| C | -0.88132 | -1.12726 | -4.03585 |
| H | -1.48121 | -0.81451 | -4.91892 |
| H | -1.55657 | -1.73595 | -3.39663 |
| H | -0.08711 | -1.79985 | -4.40545 |
| C | -2.74866 | 0.84026  | -2.92011 |
| H | -3.21205 | 1.51151  | -3.67926 |
| H | -3.25193 | 1.06628  | -1.95534 |
| H | -3.01355 | -0.19723 | -3.19426 |
| C | -1.80295 | 3.35038  | -1.91659 |
| H | -1.34669 | 4.25004  | -1.46525 |
| H | -2.53366 | 2.94543  | -1.18349 |
| H | -2.39741 | 3.68639  | -2.79653 |
| C | -1.19233 | 0.68726  | 3.12834  |
| C | 0.16311  | 0.81900  | 3.45348  |
| C | 0.56733  | 1.43722  | 4.63452  |
| H | 1.64133  | 1.53048  | 4.85407  |
| C | -0.42158 | 1.93211  | 5.50223  |
| H | -0.12036 | 2.42341  | 6.44006  |
| C | -1.78377 | 1.80149  | 5.17970  |
| H | -2.55297 | 2.18792  | 5.86599  |
| C | -2.17937 | 1.17469  | 3.98399  |
| H | -3.23855 | 1.05882  | 3.70821  |
| F | -1.51925 | 0.10701  | 1.93964  |
| F | 1.08674  | 0.36815  | 2.55407  |
| C | 0.16320  | 3.25246  | 1.60119  |
| C | 1.55670  | 3.14593  | 1.53712  |
| C | 2.36822  | 3.92743  | 2.35739  |
| H | 3.46201  | 3.82408  | 2.29309  |
| C | 1.75074  | 4.82567  | 3.24742  |
| H | 2.37746  | 5.45105  | 3.90169  |
| C | 0.34973  | 4.93087  | 3.30555  |
| H | -0.12249 | 5.63616  | 4.00629  |
| C | -0.46163 | 4.13802  | 2.47456  |
| H | -1.55996 | 4.18847  | 2.50637  |
| F | -0.56967 | 2.41920  | 0.79758  |
| F | 2.08539  | 2.23976  | 0.67162  |
| C | 0.63226  | -3.30721 | 1.45236  |
| C | -0.22734 | -4.31656 | 1.90479  |

|    |          |          |          |
|----|----------|----------|----------|
| C  | 0.17907  | -5.65071 | 1.80586  |
| H  | -0.49899 | -6.44024 | 2.16407  |
| C  | 1.43705  | -5.94453 | 1.24959  |
| H  | 1.75882  | -6.99497 | 1.17279  |
| C  | 2.28137  | -4.91432 | 0.79738  |
| H  | 3.26421  | -5.15327 | 0.36242  |
| C  | 1.88118  | -3.56923 | 0.89743  |
| H  | 2.48234  | -2.71748 | 0.52474  |
| F  | 0.17252  | -2.00726 | 1.52080  |
| F  | -1.43084 | -3.98572 | 2.40352  |
| C  | -0.66657 | -3.23652 | -1.29957 |
| C  | -1.82774 | -2.68557 | -0.74706 |
| C  | -2.92426 | -3.48169 | -0.42965 |
| H  | -3.81951 | -3.02523 | 0.01800  |
| C  | -2.83668 | -4.86234 | -0.68580 |
| H  | -3.69064 | -5.51060 | -0.43679 |
| C  | -1.67288 | -5.41495 | -1.24864 |
| H  | -1.61407 | -6.49715 | -1.44042 |
| C  | -0.57125 | -4.60018 | -1.56340 |
| H  | 0.36068  | -5.00657 | -1.98259 |
| F  | 0.37877  | -2.39619 | -1.53519 |
| F  | -1.83754 | -1.33384 | -0.50839 |
| Sr | 0.55119  | 0.01369  | -0.13727 |
| F  | 2.56054  | -0.75911 | -0.21095 |

#### Vibrational analysis

| mode | symmetry | wave number<br>cm**(-1) | IR intensity<br>km/mol | selection rules |       |
|------|----------|-------------------------|------------------------|-----------------|-------|
|      |          |                         |                        | IR              | RAMAN |
| 1    |          | -0.00                   | 0.00000                | -               | -     |
| 2    |          | -0.00                   | 0.00000                | -               | -     |
| 3    |          | 0.00                    | 0.00000                | -               | -     |
| 4    |          | 0.00                    | 0.00000                | -               | -     |
| 5    |          | 0.00                    | 0.00000                | -               | -     |
| 6    |          | 0.00                    | 0.00000                | -               | -     |
| 7    | a        | 15.33                   | 0.69057                | YES             | YES   |
| 8    | a        | 16.58                   | 0.31378                | YES             | YES   |
| 9    | a        | 19.62                   | 0.47694                | YES             | YES   |
| 10   | a        | 25.94                   | 0.28389                | YES             | YES   |
| 11   | a        | 29.84                   | 0.68123                | YES             | YES   |
| 12   | a        | 32.57                   | 0.21961                | YES             | YES   |
| 13   | a        | 37.59                   | 0.16876                | YES             | YES   |
| 14   | a        | 39.80                   | 0.12435                | YES             | YES   |
| 15   | a        | 43.90                   | 0.22317                | YES             | YES   |
| 16   | a        | 52.50                   | 0.34368                | YES             | YES   |
| 17   | a        | 53.80                   | 0.21586                | YES             | YES   |
| 18   | a        | 56.51                   | 0.91380                | YES             | YES   |
| 19   | a        | 58.06                   | 0.65425                | YES             | YES   |
| 20   | a        | 62.04                   | 0.25667                | YES             | YES   |
| 21   | a        | 64.97                   | 0.74549                | YES             | YES   |
| 22   | a        | 70.41                   | 0.24523                | YES             | YES   |
| 23   | a        | 72.14                   | 0.44242                | YES             | YES   |
| 24   | a        | 75.07                   | 0.20010                | YES             | YES   |
| 25   | a        | 76.39                   | 2.27811                | YES             | YES   |
| 26   | a        | 80.96                   | 0.65321                | YES             | YES   |
| 27   | a        | 84.33                   | 0.68808                | YES             | YES   |

|    |   |        |          |     |     |
|----|---|--------|----------|-----|-----|
| 28 | a | 87.28  | 0.44053  | YES | YES |
| 29 | a | 88.87  | 3.37792  | YES | YES |
| 30 | a | 93.97  | 1.79742  | YES | YES |
| 31 | a | 95.20  | 0.52155  | YES | YES |
| 32 | a | 100.79 | 3.98053  | YES | YES |
| 33 | a | 110.47 | 0.21260  | YES | YES |
| 34 | a | 116.52 | 17.70423 | YES | YES |
| 35 | a | 122.42 | 12.94897 | YES | YES |
| 36 | a | 123.74 | 25.40192 | YES | YES |
| 37 | a | 136.01 | 31.64804 | YES | YES |
| 38 | a | 138.56 | 0.36767  | YES | YES |
| 39 | a | 142.92 | 4.87269  | YES | YES |
| 40 | a | 149.05 | 54.62518 | YES | YES |
| 41 | a | 156.19 | 7.60895  | YES | YES |
| 42 | a | 197.41 | 1.88193  | YES | YES |
| 43 | a | 199.87 | 4.27145  | YES | YES |
| 44 | a | 201.66 | 9.26273  | YES | YES |
| 45 | a | 206.43 | 1.25961  | YES | YES |
| 46 | a | 211.61 | 0.78637  | YES | YES |
| 47 | a | 214.31 | 0.08899  | YES | YES |
| 48 | a | 219.87 | 0.91682  | YES | YES |
| 49 | a | 255.65 | 7.28356  | YES | YES |
| 50 | a | 288.75 | 0.51229  | YES | YES |
| 51 | a | 290.13 | 0.77376  | YES | YES |
| 52 | a | 294.63 | 2.34760  | YES | YES |
| 53 | a | 296.45 | 2.64010  | YES | YES |
| 54 | a | 297.39 | 5.51521  | YES | YES |
| 55 | a | 298.43 | 2.38928  | YES | YES |
| 56 | a | 304.30 | 0.86507  | YES | YES |
| 57 | a | 305.55 | 0.73525  | YES | YES |
| 58 | a | 326.43 | 0.52623  | YES | YES |
| 59 | a | 347.23 | 1.36783  | YES | YES |
| 60 | a | 366.08 | 0.63867  | YES | YES |
| 61 | a | 373.15 | 1.58375  | YES | YES |
| 62 | a | 389.57 | 0.03540  | YES | YES |
| 63 | a | 402.72 | 0.19244  | YES | YES |
| 64 | a | 433.74 | 0.09342  | YES | YES |
| 65 | a | 434.11 | 0.14073  | YES | YES |
| 66 | a | 435.30 | 0.02897  | YES | YES |
| 67 | a | 436.07 | 0.94509  | YES | YES |
| 68 | a | 436.58 | 0.76287  | YES | YES |
| 69 | a | 442.20 | 0.21191  | YES | YES |
| 70 | a | 443.64 | 4.57772  | YES | YES |
| 71 | a | 444.15 | 2.84360  | YES | YES |
| 72 | a | 447.25 | 0.03086  | YES | YES |
| 73 | a | 448.80 | 1.56530  | YES | YES |
| 74 | a | 450.64 | 58.11144 | YES | YES |
| 75 | a | 461.26 | 2.90626  | YES | YES |
| 76 | a | 535.97 | 1.91332  | YES | YES |
| 77 | a | 536.41 | 0.10944  | YES | YES |
| 78 | a | 537.40 | 4.91151  | YES | YES |
| 79 | a | 539.50 | 5.70744  | YES | YES |
| 80 | a | 543.58 | 1.12058  | YES | YES |
| 81 | a | 543.69 | 0.65736  | YES | YES |
| 82 | a | 543.78 | 1.72692  | YES | YES |

|     |   |         |           |     |     |
|-----|---|---------|-----------|-----|-----|
| 83  | a | 546.30  | 0.22014   | YES | YES |
| 84  | a | 552.96  | 1.49564   | YES | YES |
| 85  | a | 559.67  | 13.46647  | YES | YES |
| 86  | a | 559.72  | 6.23392   | YES | YES |
| 87  | a | 560.66  | 19.54886  | YES | YES |
| 88  | a | 561.81  | 1.25231   | YES | YES |
| 89  | a | 562.11  | 7.28683   | YES | YES |
| 90  | a | 572.43  | 0.19942   | YES | YES |
| 91  | a | 580.60  | 0.17790   | YES | YES |
| 92  | a | 585.93  | 0.02041   | YES | YES |
| 93  | a | 672.39  | 0.28095   | YES | YES |
| 94  | a | 672.81  | 0.34873   | YES | YES |
| 95  | a | 676.34  | 0.25689   | YES | YES |
| 96  | a | 679.44  | 0.34813   | YES | YES |
| 97  | a | 705.97  | 1.53988   | YES | YES |
| 98  | a | 744.57  | 38.89837  | YES | YES |
| 99  | a | 745.46  | 178.91931 | YES | YES |
| 100 | a | 749.30  | 1.46743   | YES | YES |
| 101 | a | 754.14  | 44.39079  | YES | YES |
| 102 | a | 755.78  | 11.54921  | YES | YES |
| 103 | a | 757.69  | 137.88035 | YES | YES |
| 104 | a | 760.82  | 10.74928  | YES | YES |
| 105 | a | 761.52  | 99.65564  | YES | YES |
| 106 | a | 789.84  | 0.56616   | YES | YES |
| 107 | a | 799.59  | 3.80913   | YES | YES |
| 108 | a | 822.67  | 5.99895   | YES | YES |
| 109 | a | 823.67  | 0.26348   | YES | YES |
| 110 | a | 825.95  | 17.95712  | YES | YES |
| 111 | a | 830.79  | 20.24898  | YES | YES |
| 112 | a | 834.83  | 1.11655   | YES | YES |
| 113 | a | 836.01  | 0.39431   | YES | YES |
| 114 | a | 838.92  | 0.33957   | YES | YES |
| 115 | a | 861.95  | 0.79926   | YES | YES |
| 116 | a | 924.61  | 2.94434   | YES | YES |
| 117 | a | 925.82  | 7.60889   | YES | YES |
| 118 | a | 927.09  | 0.78804   | YES | YES |
| 119 | a | 950.50  | 2.91333   | YES | YES |
| 120 | a | 951.53  | 7.26873   | YES | YES |
| 121 | a | 960.47  | 0.75700   | YES | YES |
| 122 | a | 970.60  | 4.05036   | YES | YES |
| 123 | a | 970.84  | 0.05673   | YES | YES |
| 124 | a | 971.41  | 0.20217   | YES | YES |
| 125 | a | 972.34  | 0.06690   | YES | YES |
| 126 | a | 983.06  | 15.10324  | YES | YES |
| 127 | a | 987.02  | 7.01019   | YES | YES |
| 128 | a | 1004.93 | 1.05293   | YES | YES |
| 129 | a | 1005.48 | 3.70240   | YES | YES |
| 130 | a | 1018.96 | 2.18691   | YES | YES |
| 131 | a | 1019.26 | 3.89439   | YES | YES |
| 132 | a | 1020.65 | 4.74565   | YES | YES |
| 133 | a | 1026.20 | 2.29881   | YES | YES |
| 134 | a | 1027.26 | 9.18714   | YES | YES |
| 135 | a | 1030.77 | 0.07814   | YES | YES |
| 136 | a | 1035.49 | 0.38446   | YES | YES |
| 137 | a | 1045.36 | 18.77988  | YES | YES |

|     |   |         |           |     |     |
|-----|---|---------|-----------|-----|-----|
| 138 | a | 1051.66 | 9.83996   | YES | YES |
| 139 | a | 1072.33 | 0.33057   | YES | YES |
| 140 | a | 1073.22 | 5.58497   | YES | YES |
| 141 | a | 1083.12 | 0.34629   | YES | YES |
| 142 | a | 1084.68 | 11.99400  | YES | YES |
| 143 | a | 1085.35 | 0.55769   | YES | YES |
| 144 | a | 1086.16 | 18.19938  | YES | YES |
| 145 | a | 1087.37 | 32.89247  | YES | YES |
| 146 | a | 1137.09 | 3.26104   | YES | YES |
| 147 | a | 1137.61 | 2.11656   | YES | YES |
| 148 | a | 1137.83 | 1.71271   | YES | YES |
| 149 | a | 1138.13 | 1.20556   | YES | YES |
| 150 | a | 1153.02 | 4.74113   | YES | YES |
| 151 | a | 1155.37 | 0.65911   | YES | YES |
| 152 | a | 1164.95 | 72.11969  | YES | YES |
| 153 | a | 1166.93 | 21.58276  | YES | YES |
| 154 | a | 1244.12 | 4.95307   | YES | YES |
| 155 | a | 1245.48 | 50.80528  | YES | YES |
| 156 | a | 1246.74 | 0.83971   | YES | YES |
| 157 | a | 1249.37 | 3.35116   | YES | YES |
| 158 | a | 1249.58 | 5.12214   | YES | YES |
| 159 | a | 1252.25 | 153.23514 | YES | YES |
| 160 | a | 1255.72 | 2.76147   | YES | YES |
| 161 | a | 1260.32 | 199.41025 | YES | YES |
| 162 | a | 1271.56 | 50.54662  | YES | YES |
| 163 | a | 1290.24 | 0.61744   | YES | YES |
| 164 | a | 1318.58 | 2.29563   | YES | YES |
| 165 | a | 1352.93 | 0.35267   | YES | YES |
| 166 | a | 1355.89 | 4.18734   | YES | YES |
| 167 | a | 1362.55 | 0.60326   | YES | YES |
| 168 | a | 1367.51 | 1.01647   | YES | YES |
| 169 | a | 1368.10 | 13.79993  | YES | YES |
| 170 | a | 1375.45 | 7.40437   | YES | YES |
| 171 | a | 1378.33 | 1.03493   | YES | YES |
| 172 | a | 1380.31 | 0.23329   | YES | YES |
| 173 | a | 1381.64 | 0.31400   | YES | YES |
| 174 | a | 1382.44 | 0.70376   | YES | YES |
| 175 | a | 1389.69 | 0.14149   | YES | YES |
| 176 | a | 1397.14 | 8.43758   | YES | YES |
| 177 | a | 1404.63 | 0.26207   | YES | YES |
| 178 | a | 1416.10 | 0.49703   | YES | YES |
| 179 | a | 1422.18 | 24.43147  | YES | YES |
| 180 | a | 1425.53 | 1.15766   | YES | YES |
| 181 | a | 1427.58 | 4.45007   | YES | YES |
| 182 | a | 1430.01 | 11.70298  | YES | YES |
| 183 | a | 1438.89 | 25.95702  | YES | YES |
| 184 | a | 1440.18 | 6.89522   | YES | YES |
| 185 | a | 1444.98 | 7.79764   | YES | YES |
| 186 | a | 1453.70 | 6.38790   | YES | YES |
| 187 | a | 1453.75 | 15.11777  | YES | YES |
| 188 | a | 1458.02 | 4.33769   | YES | YES |
| 189 | a | 1458.88 | 7.34721   | YES | YES |
| 190 | a | 1459.59 | 9.92938   | YES | YES |
| 191 | a | 1462.57 | 54.25683  | YES | YES |
| 192 | a | 1469.14 | 16.62566  | YES | YES |

|     |   |         |           |     |     |
|-----|---|---------|-----------|-----|-----|
| 193 | a | 1496.33 | 20.88743  | YES | YES |
| 194 | a | 1497.22 | 268.12048 | YES | YES |
| 195 | a | 1502.24 | 372.78542 | YES | YES |
| 196 | a | 1508.73 | 120.28010 | YES | YES |
| 197 | a | 1556.19 | 0.15960   | YES | YES |
| 198 | a | 1564.61 | 1.76001   | YES | YES |
| 199 | a | 1609.54 | 7.26157   | YES | YES |
| 200 | a | 1612.75 | 0.31291   | YES | YES |
| 201 | a | 1614.51 | 0.81372   | YES | YES |
| 202 | a | 1616.61 | 0.44311   | YES | YES |
| 203 | a | 1629.63 | 14.13797  | YES | YES |
| 204 | a | 1632.11 | 9.95386   | YES | YES |
| 205 | a | 1632.50 | 23.48476  | YES | YES |
| 206 | a | 1633.22 | 8.63354   | YES | YES |
| 207 | a | 2944.76 | 18.45047  | YES | YES |
| 208 | a | 2948.14 | 6.07204   | YES | YES |
| 209 | a | 2950.66 | 17.62048  | YES | YES |
| 210 | a | 2951.84 | 2.35882   | YES | YES |
| 211 | a | 2957.17 | 13.31134  | YES | YES |
| 212 | a | 2957.46 | 13.30103  | YES | YES |
| 213 | a | 3010.09 | 17.71563  | YES | YES |
| 214 | a | 3014.88 | 0.63406   | YES | YES |
| 215 | a | 3019.17 | 3.26040   | YES | YES |
| 216 | a | 3020.10 | 7.39027   | YES | YES |
| 217 | a | 3021.16 | 8.91856   | YES | YES |
| 218 | a | 3022.74 | 0.69380   | YES | YES |
| 219 | a | 3046.33 | 112.22574 | YES | YES |
| 220 | a | 3085.45 | 0.49951   | YES | YES |
| 221 | a | 3085.84 | 5.51103   | YES | YES |
| 222 | a | 3088.75 | 9.25027   | YES | YES |
| 223 | a | 3089.44 | 17.65615  | YES | YES |
| 224 | a | 3095.10 | 12.11742  | YES | YES |
| 225 | a | 3096.60 | 17.40803  | YES | YES |
| 226 | a | 3114.30 | 0.51542   | YES | YES |
| 227 | a | 3119.70 | 0.85514   | YES | YES |
| 228 | a | 3120.98 | 0.87867   | YES | YES |
| 229 | a | 3121.91 | 0.75022   | YES | YES |
| 230 | a | 3127.47 | 4.12686   | YES | YES |
| 231 | a | 3129.92 | 2.08371   | YES | YES |
| 232 | a | 3131.36 | 2.79115   | YES | YES |
| 233 | a | 3132.90 | 2.27699   | YES | YES |
| 234 | a | 3135.50 | 0.30669   | YES | YES |
| 235 | a | 3136.59 | 0.74217   | YES | YES |
| 236 | a | 3138.22 | 1.46283   | YES | YES |
| 237 | a | 3141.16 | 0.91087   | YES | YES |
| 238 | a | 3142.29 | 0.53716   | YES | YES |
| 239 | a | 3143.20 | 0.39845   | YES | YES |
| 240 | a | 3145.92 | 0.98689   | YES | YES |

[F-Ba(HMB)oDFB<sub>3</sub>]<sup>+</sup>

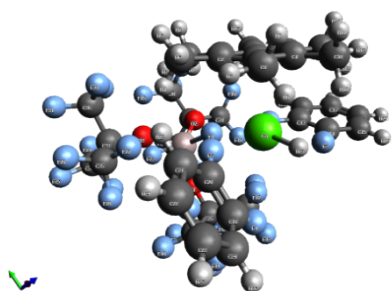

Atomic coordinates

|    |          |          |          |
|----|----------|----------|----------|
| Ca | -0.40039 | -0.97054 | 1.58435  |
| F  | -0.11580 | 0.02596  | -0.38450 |
| Al | 0.29833  | 0.26147  | -2.06320 |
| C  | 0.24684  | 2.22317  | 1.68635  |
| C  | -1.06833 | 2.05005  | 2.20439  |
| C  | -1.26728 | 1.24760  | 3.36394  |
| C  | -0.14008 | 0.69250  | 4.04412  |
| C  | 1.18153  | 0.89952  | 3.54813  |
| C  | 1.37231  | 1.66897  | 2.36003  |
| C  | 0.45589  | 3.02064  | 0.42015  |
| H  | 1.29412  | 2.62658  | -0.18431 |
| H  | 0.69491  | 4.08626  | 0.64956  |
| H  | -0.43900 | 3.01727  | -0.22793 |
| C  | -2.21354 | 2.74317  | 1.49715  |
| H  | -2.40896 | 2.30241  | 0.49640  |
| H  | -1.97798 | 3.81572  | 1.32918  |
| H  | -3.15510 | 2.70351  | 2.07630  |
| C  | -2.64069 | 0.94849  | 3.92343  |
| H  | -3.45934 | 1.29368  | 3.26585  |
| H  | -2.78678 | 1.42191  | 4.92154  |
| H  | -2.76100 | -0.15080 | 4.04419  |
| C  | -0.39842 | -0.10144 | 5.30617  |
| H  | -0.95058 | -1.03700 | 5.05340  |
| H  | -1.03039 | 0.47597  | 6.01610  |
| H  | 0.52797  | -0.37980 | 5.84171  |
| C  | 2.35381  | 0.32545  | 4.32374  |
| H  | 2.17251  | -0.72501 | 4.63057  |
| H  | 2.53555  | 0.90556  | 5.25766  |
| H  | 3.29711  | 0.33219  | 3.74684  |
| C  | 2.74180  | 1.95211  | 1.77956  |
| H  | 3.56846  | 1.53689  | 2.38560  |
| H  | 2.91392  | 3.04787  | 1.69740  |
| H  | 2.83816  | 1.54534  | 0.75101  |
| C  | 3.06666  | -1.64225 | 1.60778  |
| C  | 2.56587  | -2.55257 | 2.54262  |
| C  | 3.41496  | -3.28321 | 3.36994  |
| H  | 2.98810  | -3.99001 | 4.09725  |
| C  | 4.80114  | -3.07558 | 3.24424  |
| H  | 5.49178  | -3.64188 | 3.88807  |
| C  | 5.30472  | -2.15350 | 2.30968  |
| H  | 6.39075  | -1.99606 | 2.22145  |
| C  | 4.43602  | -1.42283 | 1.47821  |



|   |          |          |          |
|---|----------|----------|----------|
| H | 4.79984  | -0.69481 | 0.74079  |
| F | 2.15734  | -0.95671 | 0.86424  |
| F | 1.20725  | -2.66716 | 2.63825  |
| C | -3.96895 | -2.32709 | 0.82078  |
| C | -3.83383 | -0.93185 | 0.83366  |
| C | -4.93146 | -0.08952 | 0.99436  |
| H | -4.77713 | 0.99881  | 0.97262  |
| C | -6.20429 | -0.66231 | 1.16238  |
| H | -7.08123 | -0.00870 | 1.28871  |
| C | -6.35269 | -2.05952 | 1.16479  |
| H | -7.34896 | -2.50961 | 1.29748  |
| C | -5.23557 | -2.89496 | 0.99234  |
| H | -5.32439 | -3.99204 | 0.98534  |
| F | -2.89141 | -3.10048 | 0.62927  |
| F | -2.59141 | -0.38658 | 0.66055  |
| O | 0.28295  | -1.32741 | -2.80557 |
| C | -0.12216 | -2.60674 | -2.65851 |
| C | 0.40536  | -3.42587 | -3.90117 |
| F | 1.72942  | -3.65798 | -3.77841 |
| F | -0.21709 | -4.61988 | -4.01339 |
| F | 0.20706  | -2.73366 | -5.02668 |
| C | -1.69415 | -2.69104 | -2.60697 |
| F | -2.16397 | -1.71041 | -1.80107 |
| F | -2.22184 | -2.50095 | -3.82614 |
| F | -2.13577 | -3.87087 | -2.13060 |
| C | 0.48726  | -3.24692 | -1.35191 |
| F | -0.19796 | -2.80488 | -0.22524 |
| F | 0.42274  | -4.58150 | -1.32752 |
| F | 1.75773  | -2.86718 | -1.18373 |
| O | 1.95905  | 0.84793  | -1.95573 |
| C | 3.03585  | 1.04464  | -2.76057 |
| C | 3.30154  | 2.59242  | -2.88061 |
| F | 2.38121  | 3.15766  | -3.68470 |
| F | 4.52642  | 2.86768  | -3.37406 |
| F | 3.20325  | 3.17789  | -1.67137 |
| C | 4.27770  | 0.33632  | -2.11034 |
| F | 3.95601  | -0.90844 | -1.71753 |
| F | 4.68782  | 1.00822  | -1.00124 |
| F | 5.32700  | 0.26002  | -2.94998 |
| C | 2.81353  | 0.44492  | -4.20423 |
| F | 3.01418  | -0.88593 | -4.21597 |
| F | 3.62356  | 0.99676  | -5.12498 |
| F | 1.53461  | 0.66781  | -4.57786 |
| O | -0.82017 | 1.45528  | -2.62996 |
| C | -1.80626 | 2.02397  | -3.35351 |
| C | -1.60513 | 1.74251  | -4.89031 |
| F | -0.59638 | 2.49037  | -5.37926 |
| F | -2.71586 | 2.01751  | -5.60526 |
| F | -1.28918 | 0.44988  | -5.08041 |
| C | -3.20982 | 1.45891  | -2.90680 |
| F | -3.24585 | 1.31820  | -1.56373 |
| F | -3.42990 | 0.24267  | -3.44230 |
| F | -4.22754 | 2.26465  | -3.26860 |
| C | -1.76162 | 3.57770  | -3.09453 |
| F | -2.26527 | 3.86245  | -1.86603 |

|   |          |          |          |
|---|----------|----------|----------|
| F | -2.47638 | 4.27173  | -4.00085 |
| F | -0.49619 | 4.01724  | -3.12022 |
| H | -1.59843 | -1.92098 | 2.91819  |

Vibrational analysis

| mode | symmetry | wave number<br>cm <sup>**</sup> (-1) | IR intensity<br>km/mol | selection rules |       |
|------|----------|--------------------------------------|------------------------|-----------------|-------|
|      |          |                                      |                        | IR              | RAMAN |
| 1    |          | -0.00                                | 0.00000                | -               | -     |
| 2    |          | -0.00                                | 0.00000                | -               | -     |
| 3    |          | -0.00                                | 0.00000                | -               | -     |
| 4    |          | -0.00                                | 0.00000                | -               | -     |
| 5    |          | -0.00                                | 0.00000                | -               | -     |
| 6    |          | 0.00                                 | 0.00000                | -               | -     |
| 7    | a        | 6.05                                 | 0.34020                | YES             | YES   |
| 8    | a        | 11.37                                | 0.11497                | YES             | YES   |
| 9    | a        | 17.78                                | 0.24909                | YES             | YES   |
| 10   | a        | 20.59                                | 0.72819                | YES             | YES   |
| 11   | a        | 21.43                                | 1.32026                | YES             | YES   |
| 12   | a        | 23.21                                | 0.56845                | YES             | YES   |
| 13   | a        | 23.59                                | 0.05078                | YES             | YES   |
| 14   | a        | 26.18                                | 0.22185                | YES             | YES   |
| 15   | a        | 28.75                                | 0.17344                | YES             | YES   |
| 16   | a        | 29.82                                | 0.15408                | YES             | YES   |
| 17   | a        | 31.86                                | 0.37659                | YES             | YES   |
| 18   | a        | 35.91                                | 0.35815                | YES             | YES   |
| 19   | a        | 39.75                                | 0.42425                | YES             | YES   |
| 20   | a        | 41.80                                | 1.10483                | YES             | YES   |
| 21   | a        | 43.28                                | 0.60334                | YES             | YES   |
| 22   | a        | 46.79                                | 0.99197                | YES             | YES   |
| 23   | a        | 49.96                                | 0.39556                | YES             | YES   |
| 24   | a        | 51.13                                | 0.46422                | YES             | YES   |
| 25   | a        | 55.68                                | 1.08224                | YES             | YES   |
| 26   | a        | 58.38                                | 0.86557                | YES             | YES   |
| 27   | a        | 62.21                                | 0.12195                | YES             | YES   |
| 28   | a        | 65.10                                | 0.61763                | YES             | YES   |
| 29   | a        | 67.67                                | 0.43083                | YES             | YES   |
| 30   | a        | 68.76                                | 0.82095                | YES             | YES   |
| 31   | a        | 69.59                                | 1.62539                | YES             | YES   |
| 32   | a        | 72.16                                | 0.46638                | YES             | YES   |
| 33   | a        | 73.77                                | 0.60917                | YES             | YES   |
| 34   | a        | 74.22                                | 0.05874                | YES             | YES   |
| 35   | a        | 75.58                                | 0.02257                | YES             | YES   |
| 36   | a        | 78.77                                | 0.12825                | YES             | YES   |
| 37   | a        | 81.90                                | 0.72827                | YES             | YES   |
| 38   | a        | 84.27                                | 0.26164                | YES             | YES   |
| 39   | a        | 85.24                                | 0.12708                | YES             | YES   |
| 40   | a        | 87.53                                | 0.21107                | YES             | YES   |
| 41   | a        | 88.99                                | 2.77594                | YES             | YES   |
| 42   | a        | 91.79                                | 0.66023                | YES             | YES   |
| 43   | a        | 94.37                                | 1.76732                | YES             | YES   |
| 44   | a        | 97.21                                | 1.46544                | YES             | YES   |
| 45   | a        | 98.41                                | 1.29873                | YES             | YES   |
| 46   | a        | 103.20                               | 6.37450                | YES             | YES   |
| 47   | a        | 104.11                               | 0.19231                | YES             | YES   |
| 48   | a        | 115.19                               | 30.62767               | YES             | YES   |

|     |   |        |          |     |     |
|-----|---|--------|----------|-----|-----|
| 49  | a | 116.73 | 0.62746  | YES | YES |
| 50  | a | 125.65 | 0.39108  | YES | YES |
| 51  | a | 137.59 | 22.71719 | YES | YES |
| 52  | a | 142.85 | 0.18195  | YES | YES |
| 53  | a | 151.23 | 1.09468  | YES | YES |
| 54  | a | 155.42 | 4.24548  | YES | YES |
| 55  | a | 156.86 | 0.71276  | YES | YES |
| 56  | a | 158.46 | 2.32895  | YES | YES |
| 57  | a | 162.48 | 1.14303  | YES | YES |
| 58  | a | 166.01 | 0.49183  | YES | YES |
| 59  | a | 168.16 | 3.00401  | YES | YES |
| 60  | a | 171.43 | 23.04900 | YES | YES |
| 61  | a | 176.90 | 4.45793  | YES | YES |
| 62  | a | 181.18 | 3.08703  | YES | YES |
| 63  | a | 184.26 | 2.93348  | YES | YES |
| 64  | a | 193.56 | 11.99008 | YES | YES |
| 65  | a | 199.09 | 0.27725  | YES | YES |
| 66  | a | 202.56 | 1.58804  | YES | YES |
| 67  | a | 204.69 | 8.35358  | YES | YES |
| 68  | a | 207.82 | 2.31572  | YES | YES |
| 69  | a | 212.59 | 1.33068  | YES | YES |
| 70  | a | 220.81 | 9.56240  | YES | YES |
| 71  | a | 247.85 | 8.76966  | YES | YES |
| 72  | a | 261.69 | 0.49840  | YES | YES |
| 73  | a | 265.54 | 4.73814  | YES | YES |
| 74  | a | 272.82 | 1.52620  | YES | YES |
| 75  | a | 276.95 | 4.44119  | YES | YES |
| 76  | a | 279.78 | 5.98929  | YES | YES |
| 77  | a | 282.90 | 2.29139  | YES | YES |
| 78  | a | 283.82 | 2.16097  | YES | YES |
| 79  | a | 284.55 | 0.52975  | YES | YES |
| 80  | a | 285.04 | 1.39640  | YES | YES |
| 81  | a | 288.30 | 0.67559  | YES | YES |
| 82  | a | 289.89 | 21.88823 | YES | YES |
| 83  | a | 292.77 | 0.59868  | YES | YES |
| 84  | a | 303.56 | 4.45869  | YES | YES |
| 85  | a | 306.03 | 7.73092  | YES | YES |
| 86  | a | 309.13 | 3.71109  | YES | YES |
| 87  | a | 309.40 | 2.79866  | YES | YES |
| 88  | a | 313.82 | 1.18396  | YES | YES |
| 89  | a | 315.65 | 0.92777  | YES | YES |
| 90  | a | 318.93 | 2.34357  | YES | YES |
| 91  | a | 319.67 | 1.78431  | YES | YES |
| 92  | a | 320.87 | 0.32862  | YES | YES |
| 93  | a | 327.28 | 0.69795  | YES | YES |
| 94  | a | 328.36 | 0.74613  | YES | YES |
| 95  | a | 337.72 | 1.59023  | YES | YES |
| 96  | a | 343.11 | 0.56819  | YES | YES |
| 97  | a | 347.30 | 1.11864  | YES | YES |
| 98  | a | 351.55 | 1.42257  | YES | YES |
| 99  | a | 353.92 | 0.95118  | YES | YES |
| 100 | a | 358.53 | 3.29468  | YES | YES |
| 101 | a | 364.96 | 6.45589  | YES | YES |
| 102 | a | 371.12 | 31.92829 | YES | YES |
| 103 | a | 373.85 | 1.43218  | YES | YES |

|     |   |        |           |     |     |
|-----|---|--------|-----------|-----|-----|
| 104 | a | 395.78 | 0.14133   | YES | YES |
| 105 | a | 404.84 | 30.41221  | YES | YES |
| 106 | a | 410.33 | 0.58170   | YES | YES |
| 107 | a | 434.02 | 4.42990   | YES | YES |
| 108 | a | 439.70 | 34.88741  | YES | YES |
| 109 | a | 439.85 | 5.31429   | YES | YES |
| 110 | a | 441.15 | 6.02968   | YES | YES |
| 111 | a | 443.22 | 2.44910   | YES | YES |
| 112 | a | 446.07 | 2.41599   | YES | YES |
| 113 | a | 449.16 | 8.85492   | YES | YES |
| 114 | a | 451.36 | 2.00605   | YES | YES |
| 115 | a | 455.05 | 30.76020  | YES | YES |
| 116 | a | 485.91 | 272.24332 | YES | YES |
| 117 | a | 514.23 | 5.20074   | YES | YES |
| 118 | a | 516.45 | 53.00746  | YES | YES |
| 119 | a | 517.59 | 12.84813  | YES | YES |
| 120 | a | 518.20 | 1.10099   | YES | YES |
| 121 | a | 520.01 | 118.24277 | YES | YES |
| 122 | a | 520.29 | 142.35251 | YES | YES |
| 123 | a | 520.67 | 9.18731   | YES | YES |
| 124 | a | 521.52 | 17.41541  | YES | YES |
| 125 | a | 523.88 | 4.21187   | YES | YES |
| 126 | a | 524.87 | 6.92388   | YES | YES |
| 127 | a | 527.33 | 20.86553  | YES | YES |
| 128 | a | 536.92 | 4.77023   | YES | YES |
| 129 | a | 542.40 | 2.28931   | YES | YES |
| 130 | a | 542.82 | 3.22268   | YES | YES |
| 131 | a | 546.45 | 4.20272   | YES | YES |
| 132 | a | 550.53 | 13.34618  | YES | YES |
| 133 | a | 551.08 | 1.23077   | YES | YES |
| 134 | a | 551.53 | 7.02674   | YES | YES |
| 135 | a | 553.47 | 1.48774   | YES | YES |
| 136 | a | 553.63 | 1.55232   | YES | YES |
| 137 | a | 554.17 | 1.15506   | YES | YES |
| 138 | a | 555.18 | 0.58302   | YES | YES |
| 139 | a | 558.66 | 25.26955  | YES | YES |
| 140 | a | 559.53 | 6.98193   | YES | YES |
| 141 | a | 563.29 | 19.54328  | YES | YES |
| 142 | a | 564.00 | 6.51145   | YES | YES |
| 143 | a | 566.14 | 0.44077   | YES | YES |
| 144 | a | 567.06 | 11.75228  | YES | YES |
| 145 | a | 570.31 | 12.15867  | YES | YES |
| 146 | a | 586.25 | 1.47094   | YES | YES |
| 147 | a | 674.27 | 0.05147   | YES | YES |
| 148 | a | 681.73 | 0.60487   | YES | YES |
| 149 | a | 687.46 | 195.23313 | YES | YES |
| 150 | a | 695.33 | 0.03062   | YES | YES |
| 151 | a | 701.76 | 29.18476  | YES | YES |
| 152 | a | 706.51 | 16.16210  | YES | YES |
| 153 | a | 707.24 | 37.48267  | YES | YES |
| 154 | a | 707.81 | 26.45430  | YES | YES |
| 155 | a | 708.67 | 17.84217  | YES | YES |
| 156 | a | 710.64 | 106.48939 | YES | YES |
| 157 | a | 728.66 | 7.54839   | YES | YES |
| 158 | a | 735.44 | 2.69085   | YES | YES |

|     |   |         |           |     |     |
|-----|---|---------|-----------|-----|-----|
| 159 | a | 737.33  | 0.93210   | YES | YES |
| 160 | a | 740.92  | 66.74386  | YES | YES |
| 161 | a | 747.00  | 64.25214  | YES | YES |
| 162 | a | 759.46  | 65.71515  | YES | YES |
| 163 | a | 761.65  | 29.91664  | YES | YES |
| 164 | a | 790.64  | 0.18415   | YES | YES |
| 165 | a | 794.18  | 17.01390  | YES | YES |
| 166 | a | 802.65  | 5.37183   | YES | YES |
| 167 | a | 825.01  | 13.29323  | YES | YES |
| 168 | a | 830.63  | 36.23175  | YES | YES |
| 169 | a | 831.74  | 1.77346   | YES | YES |
| 170 | a | 833.46  | 14.48790  | YES | YES |
| 171 | a | 843.60  | 0.96702   | YES | YES |
| 172 | a | 861.58  | 19.45107  | YES | YES |
| 173 | a | 915.68  | 4.40435   | YES | YES |
| 174 | a | 928.60  | 1.90852   | YES | YES |
| 175 | a | 931.25  | 192.45342 | YES | YES |
| 176 | a | 950.84  | 2.15887   | YES | YES |
| 177 | a | 953.27  | 52.18201  | YES | YES |
| 178 | a | 956.17  | 48.73367  | YES | YES |
| 179 | a | 957.35  | 0.11739   | YES | YES |
| 180 | a | 961.23  | 308.52348 | YES | YES |
| 181 | a | 962.68  | 165.84630 | YES | YES |
| 182 | a | 963.19  | 202.05135 | YES | YES |
| 183 | a | 966.02  | 1.87145   | YES | YES |
| 184 | a | 968.58  | 3.78873   | YES | YES |
| 185 | a | 974.64  | 1.59476   | YES | YES |
| 186 | a | 982.18  | 21.02037  | YES | YES |
| 187 | a | 1002.43 | 6.34208   | YES | YES |
| 188 | a | 1006.72 | 1.15671   | YES | YES |
| 189 | a | 1020.13 | 5.80759   | YES | YES |
| 190 | a | 1024.30 | 9.09864   | YES | YES |
| 191 | a | 1026.58 | 0.98646   | YES | YES |
| 192 | a | 1031.28 | 0.85146   | YES | YES |
| 193 | a | 1034.60 | 1.05523   | YES | YES |
| 194 | a | 1046.93 | 19.83510  | YES | YES |
| 195 | a | 1050.01 | 21.01666  | YES | YES |
| 196 | a | 1054.01 | 10.95506  | YES | YES |
| 197 | a | 1075.27 | 0.38589   | YES | YES |
| 198 | a | 1077.35 | 1.17338   | YES | YES |
| 199 | a | 1084.18 | 5.41432   | YES | YES |
| 200 | a | 1085.66 | 4.88930   | YES | YES |
| 201 | a | 1087.56 | 15.82984  | YES | YES |
| 202 | a | 1094.53 | 4.72822   | YES | YES |
| 203 | a | 1098.73 | 0.09305   | YES | YES |
| 204 | a | 1133.24 | 1.78516   | YES | YES |
| 205 | a | 1136.20 | 7.07216   | YES | YES |
| 206 | a | 1136.33 | 18.62672  | YES | YES |
| 207 | a | 1145.74 | 36.36678  | YES | YES |
| 208 | a | 1152.06 | 18.35521  | YES | YES |
| 209 | a | 1156.90 | 30.38542  | YES | YES |
| 210 | a | 1158.00 | 27.22954  | YES | YES |
| 211 | a | 1162.46 | 17.69605  | YES | YES |
| 212 | a | 1168.86 | 25.10754  | YES | YES |
| 213 | a | 1172.69 | 4.54431   | YES | YES |

|     |   |         |           |     |     |
|-----|---|---------|-----------|-----|-----|
| 214 | a | 1176.59 | 23.08065  | YES | YES |
| 215 | a | 1177.80 | 11.18358  | YES | YES |
| 216 | a | 1184.82 | 17.58230  | YES | YES |
| 217 | a | 1194.89 | 25.27568  | YES | YES |
| 218 | a | 1199.29 | 69.83146  | YES | YES |
| 219 | a | 1199.65 | 80.16578  | YES | YES |
| 220 | a | 1209.39 | 414.76656 | YES | YES |
| 221 | a | 1210.06 | 40.82231  | YES | YES |
| 222 | a | 1212.81 | 5.99628   | YES | YES |
| 223 | a | 1220.96 | 265.35372 | YES | YES |
| 224 | a | 1229.79 | 252.49821 | YES | YES |
| 225 | a | 1232.36 | 320.71417 | YES | YES |
| 226 | a | 1237.52 | 671.72517 | YES | YES |
| 227 | a | 1239.99 | 560.84381 | YES | YES |
| 228 | a | 1243.68 | 373.20480 | YES | YES |
| 229 | a | 1244.06 | 659.54759 | YES | YES |
| 230 | a | 1247.26 | 296.39938 | YES | YES |
| 231 | a | 1250.78 | 957.72903 | YES | YES |
| 232 | a | 1251.52 | 26.31170  | YES | YES |
| 233 | a | 1254.98 | 373.45853 | YES | YES |
| 234 | a | 1258.79 | 201.95079 | YES | YES |
| 235 | a | 1260.44 | 507.34406 | YES | YES |
| 236 | a | 1266.96 | 95.66486  | YES | YES |
| 237 | a | 1274.67 | 103.65712 | YES | YES |
| 238 | a | 1304.64 | 0.56381   | YES | YES |
| 239 | a | 1311.96 | 0.80338   | YES | YES |
| 240 | a | 1323.09 | 95.69192  | YES | YES |
| 241 | a | 1343.23 | 2.51183   | YES | YES |
| 242 | a | 1345.28 | 161.31824 | YES | YES |
| 243 | a | 1351.12 | 2.74360   | YES | YES |
| 244 | a | 1357.55 | 5.47419   | YES | YES |
| 245 | a | 1362.55 | 3.72856   | YES | YES |
| 246 | a | 1367.97 | 0.17426   | YES | YES |
| 247 | a | 1370.50 | 105.75399 | YES | YES |
| 248 | a | 1375.92 | 129.32082 | YES | YES |
| 249 | a | 1379.29 | 1.87705   | YES | YES |
| 250 | a | 1382.55 | 0.60855   | YES | YES |
| 251 | a | 1390.87 | 0.99321   | YES | YES |
| 252 | a | 1396.33 | 3.15948   | YES | YES |
| 253 | a | 1410.22 | 1.58622   | YES | YES |
| 254 | a | 1416.60 | 0.64300   | YES | YES |
| 255 | a | 1417.94 | 14.92686  | YES | YES |
| 256 | a | 1422.05 | 1.16592   | YES | YES |
| 257 | a | 1429.12 | 37.72359  | YES | YES |
| 258 | a | 1431.80 | 6.13926   | YES | YES |
| 259 | a | 1442.85 | 36.77715  | YES | YES |
| 260 | a | 1447.64 | 8.11746   | YES | YES |
| 261 | a | 1448.23 | 10.85469  | YES | YES |
| 262 | a | 1456.13 | 8.70280   | YES | YES |
| 263 | a | 1457.27 | 2.91366   | YES | YES |
| 264 | a | 1458.93 | 8.09928   | YES | YES |
| 265 | a | 1467.61 | 40.36384  | YES | YES |
| 266 | a | 1474.87 | 13.01384  | YES | YES |
| 267 | a | 1499.38 | 208.68942 | YES | YES |
| 268 | a | 1510.12 | 194.57191 | YES | YES |

|     |   |         |          |     |     |
|-----|---|---------|----------|-----|-----|
| 269 | a | 1556.58 | 0.44305  | YES | YES |
| 270 | a | 1563.72 | 0.48350  | YES | YES |
| 271 | a | 1613.31 | 7.94350  | YES | YES |
| 272 | a | 1615.44 | 1.32328  | YES | YES |
| 273 | a | 1633.22 | 26.82292 | YES | YES |
| 274 | a | 1633.37 | 3.34064  | YES | YES |
| 275 | a | 2925.32 | 24.34659 | YES | YES |
| 276 | a | 2933.39 | 25.60229 | YES | YES |
| 277 | a | 2937.98 | 12.99025 | YES | YES |
| 278 | a | 2947.71 | 16.31224 | YES | YES |
| 279 | a | 2960.05 | 12.76770 | YES | YES |
| 280 | a | 2967.15 | 9.91801  | YES | YES |
| 281 | a | 3001.77 | 7.56786  | YES | YES |
| 282 | a | 3005.89 | 0.40251  | YES | YES |
| 283 | a | 3026.29 | 8.29572  | YES | YES |
| 284 | a | 3031.38 | 5.51362  | YES | YES |
| 285 | a | 3037.77 | 4.76803  | YES | YES |
| 286 | a | 3057.15 | 0.78428  | YES | YES |
| 287 | a | 3072.19 | 1.29220  | YES | YES |
| 288 | a | 3073.68 | 5.07865  | YES | YES |
| 289 | a | 3080.20 | 32.89962 | YES | YES |
| 290 | a | 3083.14 | 7.68894  | YES | YES |
| 291 | a | 3085.00 | 22.31461 | YES | YES |
| 292 | a | 3103.77 | 1.20630  | YES | YES |
| 293 | a | 3111.05 | 1.84943  | YES | YES |
| 294 | a | 3116.61 | 2.20203  | YES | YES |
| 295 | a | 3124.29 | 10.07498 | YES | YES |
| 296 | a | 3129.19 | 5.39454  | YES | YES |
| 297 | a | 3133.92 | 1.55487  | YES | YES |
| 298 | a | 3138.69 | 0.51973  | YES | YES |
| 299 | a | 3143.07 | 0.10572  | YES | YES |
| 300 | a | 3160.93 | 10.46687 | YES | YES |

H-Ca(HMB)oDFB<sub>2</sub>{f-al}

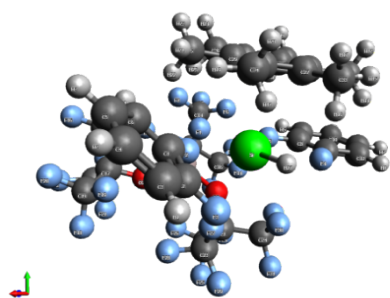

Atomic coordinates

|    |          |          |          |
|----|----------|----------|----------|
| Sr | -0.26830 | -0.43406 | -1.43859 |
| Al | 0.61042  | -1.02892 | 1.85974  |
| F  | 0.44841  | 0.36447  | 0.83538  |
| C  | 3.47765  | -0.24340 | -2.19374 |
| C  | 3.60932  | -1.09529 | -3.30060 |
| C  | 4.72456  | -0.96011 | -4.13763 |
| H  | 4.80630  | -1.62882 | -5.00819 |
| C  | 5.70276  | 0.00473  | -3.84738 |

|   |          |          |          |
|---|----------|----------|----------|
| H | 6.57833  | 0.10440  | -4.50793 |
| C | 5.57198  | 0.82960  | -2.71730 |
| H | 6.34587  | 1.57522  | -2.47787 |
| C | 4.45132  | 0.70325  | -1.87963 |
| H | 4.32537  | 1.31942  | -0.98011 |
| F | 2.36945  | -0.35154 | -1.39532 |
| F | 2.68482  | -2.02627 | -3.54949 |
| C | -3.96087 | -0.60480 | -1.51565 |
| C | -3.70975 | -0.17827 | -0.20914 |
| C | -4.74887 | 0.09483  | 0.67730  |
| H | -4.51639 | 0.41813  | 1.70113  |
| C | -6.06892 | -0.06318 | 0.21905  |
| H | -6.90504 | 0.14836  | 0.90332  |
| C | -6.32525 | -0.49094 | -1.09615 |
| H | -7.36267 | -0.61305 | -1.44416 |
| C | -5.26532 | -0.76842 | -1.97816 |
| H | -5.43391 | -1.10275 | -3.01278 |
| F | -2.88981 | -0.83841 | -2.32257 |
| F | -2.40769 | -0.03804 | 0.16402  |
| O | -0.19330 | -0.90962 | 3.39028  |
| C | -1.19088 | -0.43367 | 4.17096  |
| C | -1.45923 | 1.08783  | 3.87070  |
| F | -2.14065 | 1.21703  | 2.69874  |
| F | -2.18348 | 1.69017  | 4.83033  |
| F | -0.30117 | 1.74860  | 3.73254  |
| C | -0.75511 | -0.59863 | 5.67616  |
| F | -0.20625 | -1.80386 | 5.86896  |
| F | 0.15830  | 0.33610  | 6.00428  |
| F | -1.80810 | -0.46715 | 6.51297  |
| C | -2.51058 | -1.25607 | 3.91315  |
| F | -2.46088 | -2.45515 | 4.51537  |
| F | -3.61559 | -0.61062 | 4.34978  |
| F | -2.65786 | -1.47094 | 2.58803  |
| O | 2.28858  | -1.48721 | 1.97145  |
| C | 3.44500  | -1.11490 | 2.57959  |
| C | 3.59654  | 0.45099  | 2.57246  |
| F | 2.41594  | 1.02383  | 2.89788  |
| F | 4.52990  | 0.89524  | 3.42844  |
| F | 3.91991  | 0.89809  | 1.33441  |
| C | 4.63412  | -1.76489 | 1.78019  |
| F | 4.71757  | -3.08193 | 2.04310  |
| F | 4.43897  | -1.62320 | 0.45673  |
| F | 5.81804  | -1.19590 | 2.09228  |
| C | 3.46608  | -1.62983 | 4.07030  |
| F | 2.98276  | -2.87791 | 4.13325  |
| F | 4.71032  | -1.62469 | 4.59156  |
| F | 2.68692  | -0.84454 | 4.84571  |
| O | -0.16973 | -2.13077 | 0.64857  |
| C | -0.23871 | -3.48833 | 0.44661  |
| C | -0.34957 | -4.28315 | 1.79668  |
| F | -1.59607 | -4.22405 | 2.29765  |
| F | -0.02455 | -5.57798 | 1.63282  |
| F | 0.48526  | -3.73960 | 2.70305  |
| C | 1.05071  | -3.95404 | -0.33656 |
| F | 1.35232  | -3.01303 | -1.26762 |



|   |          |          |          |
|---|----------|----------|----------|
| F | 2.10092  | -4.06169 | 0.48798  |
| F | 0.88014  | -5.12434 | -0.97159 |
| C | -1.51206 | -3.74754 | -0.43043 |
| F | -1.31670 | -3.16979 | -1.65740 |
| F | -1.77820 | -5.04341 | -0.61216 |
| F | -2.59355 | -3.15315 | 0.10054  |
| C | -1.93920 | 2.84990  | -1.10543 |
| C | -2.15382 | 2.46480  | -2.46229 |
| C | -1.03968 | 2.27545  | -3.32757 |
| C | 0.29263  | 2.42703  | -2.83841 |
| C | 0.50331  | 2.81676  | -1.48617 |
| C | -0.61285 | 3.02312  | -0.62509 |
| C | -3.09195 | 3.15207  | -0.16650 |
| H | -3.10888 | 4.23295  | 0.10115  |
| H | -3.00579 | 2.58901  | 0.78547  |
| H | -4.08040 | 2.91354  | -0.59997 |
| C | -3.55145 | 2.29620  | -3.02987 |
| H | -3.83429 | 3.16366  | -3.66996 |
| H | -4.32700 | 2.20441  | -2.24694 |
| H | -3.62534 | 1.39021  | -3.66478 |
| C | -1.22138 | 1.91112  | -4.78374 |
| H | -2.27049 | 1.98865  | -5.12477 |
| H | -0.87708 | 0.86035  | -4.94170 |
| H | -0.61087 | 2.56855  | -5.44029 |
| C | 1.42873  | 2.16672  | -3.80466 |
| H | 1.30930  | 1.15672  | -4.25812 |
| H | 2.42573  | 2.19985  | -3.32745 |
| H | 1.43200  | 2.90979  | -4.63482 |
| C | 1.88306  | 3.06412  | -0.91557 |
| H | 2.68253  | 2.96263  | -1.67150 |
| H | 2.10904  | 2.36588  | -0.08035 |
| H | 1.95700  | 4.09135  | -0.49485 |
| C | -0.34023 | 3.47293  | 0.79294  |
| H | 0.12020  | 4.48792  | 0.80598  |
| H | 0.37012  | 2.78671  | 1.29735  |
| H | -1.24983 | 3.51636  | 1.41721  |
| H | -0.03296 | -0.79119 | -3.60457 |

### Vibrational analysis

| mode | symmetry | wave number<br>cm <sup>**</sup> (-1) | IR intensity<br>km/mol | selection rules |       |
|------|----------|--------------------------------------|------------------------|-----------------|-------|
|      |          |                                      |                        | IR              | RAMAN |
| 1    |          | -0.00                                | 0.00000                | -               | -     |
| 2    |          | -0.00                                | 0.00000                | -               | -     |
| 3    |          | -0.00                                | 0.00000                | -               | -     |
| 4    |          | -0.00                                | 0.00000                | -               | -     |
| 5    |          | -0.00                                | 0.00000                | -               | -     |
| 6    |          | 0.00                                 | 0.00000                | -               | -     |
| 7    | a        | 11.66                                | 1.91519                | YES             | YES   |
| 8    | a        | 15.54                                | 0.57148                | YES             | YES   |
| 9    | a        | 17.81                                | 0.17174                | YES             | YES   |
| 10   | a        | 19.41                                | 0.08586                | YES             | YES   |
| 11   | a        | 22.00                                | 0.12001                | YES             | YES   |
| 12   | a        | 24.22                                | 0.17826                | YES             | YES   |
| 13   | a        | 24.73                                | 0.56445                | YES             | YES   |

|    |   |        |          |     |     |
|----|---|--------|----------|-----|-----|
| 14 | a | 28.06  | 0.18811  | YES | YES |
| 15 | a | 28.93  | 0.18316  | YES | YES |
| 16 | a | 30.39  | 0.34670  | YES | YES |
| 17 | a | 32.49  | 0.47797  | YES | YES |
| 18 | a | 35.35  | 0.12716  | YES | YES |
| 19 | a | 36.84  | 0.99436  | YES | YES |
| 20 | a | 38.27  | 1.25884  | YES | YES |
| 21 | a | 42.81  | 1.38000  | YES | YES |
| 22 | a | 43.38  | 0.56331  | YES | YES |
| 23 | a | 49.12  | 2.64445  | YES | YES |
| 24 | a | 49.37  | 0.80486  | YES | YES |
| 25 | a | 54.32  | 0.30877  | YES | YES |
| 26 | a | 58.11  | 0.92987  | YES | YES |
| 27 | a | 60.93  | 0.83030  | YES | YES |
| 28 | a | 61.76  | 0.90896  | YES | YES |
| 29 | a | 63.84  | 1.78568  | YES | YES |
| 30 | a | 66.73  | 0.27560  | YES | YES |
| 31 | a | 68.06  | 0.20918  | YES | YES |
| 32 | a | 70.33  | 0.16465  | YES | YES |
| 33 | a | 70.62  | 0.34110  | YES | YES |
| 34 | a | 71.95  | 0.90532  | YES | YES |
| 35 | a | 73.87  | 1.14946  | YES | YES |
| 36 | a | 76.77  | 0.77561  | YES | YES |
| 37 | a | 78.24  | 0.20687  | YES | YES |
| 38 | a | 80.44  | 0.19204  | YES | YES |
| 39 | a | 82.42  | 0.16720  | YES | YES |
| 40 | a | 84.09  | 1.88608  | YES | YES |
| 41 | a | 84.49  | 0.56215  | YES | YES |
| 42 | a | 86.37  | 0.33929  | YES | YES |
| 43 | a | 93.49  | 6.83575  | YES | YES |
| 44 | a | 94.24  | 2.75877  | YES | YES |
| 45 | a | 96.34  | 5.53098  | YES | YES |
| 46 | a | 103.55 | 5.79433  | YES | YES |
| 47 | a | 105.90 | 3.14018  | YES | YES |
| 48 | a | 110.20 | 2.17984  | YES | YES |
| 49 | a | 114.43 | 3.44633  | YES | YES |
| 50 | a | 116.22 | 15.03446 | YES | YES |
| 51 | a | 129.06 | 19.37653 | YES | YES |
| 52 | a | 134.57 | 0.47857  | YES | YES |
| 53 | a | 142.52 | 0.86863  | YES | YES |
| 54 | a | 151.43 | 0.26032  | YES | YES |
| 55 | a | 155.97 | 0.49471  | YES | YES |
| 56 | a | 158.46 | 0.05478  | YES | YES |
| 57 | a | 160.46 | 0.62064  | YES | YES |
| 58 | a | 164.40 | 2.28535  | YES | YES |
| 59 | a | 168.68 | 0.20516  | YES | YES |
| 60 | a | 171.55 | 1.18599  | YES | YES |
| 61 | a | 174.01 | 6.02371  | YES | YES |
| 62 | a | 178.92 | 2.08252  | YES | YES |
| 63 | a | 184.12 | 4.56876  | YES | YES |
| 64 | a | 193.70 | 0.50061  | YES | YES |
| 65 | a | 195.73 | 9.26591  | YES | YES |
| 66 | a | 199.24 | 0.97060  | YES | YES |
| 67 | a | 201.42 | 0.47057  | YES | YES |
| 68 | a | 205.28 | 0.21362  | YES | YES |

|     |   |        |           |     |     |
|-----|---|--------|-----------|-----|-----|
| 69  | a | 216.02 | 3.69746   | YES | YES |
| 70  | a | 241.64 | 6.24866   | YES | YES |
| 71  | a | 257.63 | 11.32486  | YES | YES |
| 72  | a | 260.27 | 12.49197  | YES | YES |
| 73  | a | 269.14 | 2.29550   | YES | YES |
| 74  | a | 271.95 | 18.85654  | YES | YES |
| 75  | a | 275.44 | 4.02934   | YES | YES |
| 76  | a | 277.47 | 2.46355   | YES | YES |
| 77  | a | 281.84 | 2.56972   | YES | YES |
| 78  | a | 284.33 | 0.46584   | YES | YES |
| 79  | a | 285.21 | 0.06268   | YES | YES |
| 80  | a | 287.35 | 8.90967   | YES | YES |
| 81  | a | 288.09 | 1.53297   | YES | YES |
| 82  | a | 292.07 | 2.92337   | YES | YES |
| 83  | a | 293.59 | 0.71697   | YES | YES |
| 84  | a | 295.97 | 1.04424   | YES | YES |
| 85  | a | 306.90 | 6.50756   | YES | YES |
| 86  | a | 307.50 | 1.30459   | YES | YES |
| 87  | a | 308.44 | 4.36301   | YES | YES |
| 88  | a | 315.04 | 0.95307   | YES | YES |
| 89  | a | 318.99 | 1.17707   | YES | YES |
| 90  | a | 320.48 | 2.19142   | YES | YES |
| 91  | a | 321.60 | 0.65956   | YES | YES |
| 92  | a | 324.60 | 1.87562   | YES | YES |
| 93  | a | 327.44 | 0.11658   | YES | YES |
| 94  | a | 331.52 | 1.84627   | YES | YES |
| 95  | a | 331.96 | 0.97859   | YES | YES |
| 96  | a | 347.09 | 36.23683  | YES | YES |
| 97  | a | 348.35 | 1.01617   | YES | YES |
| 98  | a | 354.54 | 49.41552  | YES | YES |
| 99  | a | 358.04 | 135.00836 | YES | YES |
| 100 | a | 359.67 | 30.99364  | YES | YES |
| 101 | a | 360.71 | 5.64462   | YES | YES |
| 102 | a | 370.23 | 43.65101  | YES | YES |
| 103 | a | 371.67 | 24.33391  | YES | YES |
| 104 | a | 389.82 | 85.04398  | YES | YES |
| 105 | a | 393.89 | 2.69466   | YES | YES |
| 106 | a | 404.69 | 4.65631   | YES | YES |
| 107 | a | 407.77 | 5.17065   | YES | YES |
| 108 | a | 436.20 | 13.10625  | YES | YES |
| 109 | a | 437.19 | 1.89265   | YES | YES |
| 110 | a | 441.72 | 0.75675   | YES | YES |
| 111 | a | 444.97 | 5.01775   | YES | YES |
| 112 | a | 448.07 | 0.23139   | YES | YES |
| 113 | a | 450.48 | 52.05800  | YES | YES |
| 114 | a | 451.98 | 17.39015  | YES | YES |
| 115 | a | 454.10 | 64.67539  | YES | YES |
| 116 | a | 457.66 | 247.96417 | YES | YES |
| 117 | a | 467.79 | 56.22754  | YES | YES |
| 118 | a | 514.95 | 5.60135   | YES | YES |
| 119 | a | 516.67 | 4.57483   | YES | YES |
| 120 | a | 517.95 | 1.07223   | YES | YES |
| 121 | a | 518.71 | 6.01317   | YES | YES |
| 122 | a | 520.11 | 4.54636   | YES | YES |
| 123 | a | 520.74 | 5.14455   | YES | YES |

|     |   |        |           |     |     |
|-----|---|--------|-----------|-----|-----|
| 124 | a | 522.02 | 1.78356   | YES | YES |
| 125 | a | 523.93 | 0.67294   | YES | YES |
| 126 | a | 524.69 | 2.86039   | YES | YES |
| 127 | a | 527.57 | 1.77734   | YES | YES |
| 128 | a | 534.45 | 3.99915   | YES | YES |
| 129 | a | 542.96 | 3.89296   | YES | YES |
| 130 | a | 545.86 | 1.04871   | YES | YES |
| 131 | a | 546.41 | 11.49764  | YES | YES |
| 132 | a | 547.09 | 1.31178   | YES | YES |
| 133 | a | 552.49 | 2.74059   | YES | YES |
| 134 | a | 553.84 | 0.95812   | YES | YES |
| 135 | a | 554.06 | 0.22471   | YES | YES |
| 136 | a | 554.78 | 0.43956   | YES | YES |
| 137 | a | 555.45 | 0.58263   | YES | YES |
| 138 | a | 556.25 | 1.60584   | YES | YES |
| 139 | a | 560.46 | 1.11899   | YES | YES |
| 140 | a | 560.86 | 11.23863  | YES | YES |
| 141 | a | 563.35 | 25.65812  | YES | YES |
| 142 | a | 566.64 | 29.05260  | YES | YES |
| 143 | a | 566.87 | 4.52085   | YES | YES |
| 144 | a | 567.54 | 2.64366   | YES | YES |
| 145 | a | 577.37 | 1.67413   | YES | YES |
| 146 | a | 585.82 | 0.24192   | YES | YES |
| 147 | a | 681.05 | 0.23447   | YES | YES |
| 148 | a | 682.30 | 0.33601   | YES | YES |
| 149 | a | 685.00 | 113.15144 | YES | YES |
| 150 | a | 705.01 | 18.39158  | YES | YES |
| 151 | a | 706.11 | 19.37564  | YES | YES |
| 152 | a | 707.14 | 27.13373  | YES | YES |
| 153 | a | 708.37 | 0.18404   | YES | YES |
| 154 | a | 708.88 | 51.52551  | YES | YES |
| 155 | a | 709.54 | 30.31141  | YES | YES |
| 156 | a | 711.21 | 66.77601  | YES | YES |
| 157 | a | 725.84 | 11.84614  | YES | YES |
| 158 | a | 738.55 | 2.19008   | YES | YES |
| 159 | a | 738.99 | 13.07734  | YES | YES |
| 160 | a | 743.02 | 71.69578  | YES | YES |
| 161 | a | 745.78 | 81.38507  | YES | YES |
| 162 | a | 756.71 | 59.30708  | YES | YES |
| 163 | a | 761.68 | 42.06519  | YES | YES |
| 164 | a | 779.02 | 15.87554  | YES | YES |
| 165 | a | 790.49 | 0.29330   | YES | YES |
| 166 | a | 799.74 | 2.79007   | YES | YES |
| 167 | a | 826.35 | 15.45208  | YES | YES |
| 168 | a | 830.12 | 44.65944  | YES | YES |
| 169 | a | 833.63 | 13.56534  | YES | YES |
| 170 | a | 834.92 | 5.54893   | YES | YES |
| 171 | a | 841.15 | 0.54729   | YES | YES |
| 172 | a | 862.57 | 26.96689  | YES | YES |
| 173 | a | 918.31 | 10.84427  | YES | YES |
| 174 | a | 926.23 | 3.52844   | YES | YES |
| 175 | a | 950.40 | 0.07911   | YES | YES |
| 176 | a | 955.46 | 21.91679  | YES | YES |
| 177 | a | 956.40 | 21.29223  | YES | YES |
| 178 | a | 958.63 | 13.00729  | YES | YES |

|     |   |         |           |     |     |
|-----|---|---------|-----------|-----|-----|
| 179 | a | 959.88  | 156.41918 | YES | YES |
| 180 | a | 962.05  | 193.46388 | YES | YES |
| 181 | a | 964.69  | 2.25473   | YES | YES |
| 182 | a | 966.67  | 116.22529 | YES | YES |
| 183 | a | 967.07  | 84.22327  | YES | YES |
| 184 | a | 969.58  | 359.38651 | YES | YES |
| 185 | a | 972.39  | 4.93577   | YES | YES |
| 186 | a | 985.04  | 18.30018  | YES | YES |
| 187 | a | 1003.69 | 3.65262   | YES | YES |
| 188 | a | 1008.86 | 0.83553   | YES | YES |
| 189 | a | 1020.40 | 7.72544   | YES | YES |
| 190 | a | 1026.17 | 7.66095   | YES | YES |
| 191 | a | 1028.70 | 1.31072   | YES | YES |
| 192 | a | 1034.94 | 0.79780   | YES | YES |
| 193 | a | 1036.04 | 0.64135   | YES | YES |
| 194 | a | 1050.08 | 9.30130   | YES | YES |
| 195 | a | 1050.89 | 8.83458   | YES | YES |
| 196 | a | 1074.50 | 0.82792   | YES | YES |
| 197 | a | 1074.86 | 6.43047   | YES | YES |
| 198 | a | 1078.21 | 2.73447   | YES | YES |
| 199 | a | 1084.64 | 0.05291   | YES | YES |
| 200 | a | 1086.85 | 4.86364   | YES | YES |
| 201 | a | 1087.21 | 7.43976   | YES | YES |
| 202 | a | 1093.10 | 10.68296  | YES | YES |
| 203 | a | 1097.79 | 2.96783   | YES | YES |
| 204 | a | 1102.57 | 432.45898 | YES | YES |
| 205 | a | 1132.66 | 2.38894   | YES | YES |
| 206 | a | 1134.01 | 9.32290   | YES | YES |
| 207 | a | 1136.75 | 13.67117  | YES | YES |
| 208 | a | 1144.29 | 19.35149  | YES | YES |
| 209 | a | 1147.82 | 65.19492  | YES | YES |
| 210 | a | 1155.90 | 21.62325  | YES | YES |
| 211 | a | 1161.71 | 18.73968  | YES | YES |
| 212 | a | 1164.55 | 39.16769  | YES | YES |
| 213 | a | 1170.94 | 5.19444   | YES | YES |
| 214 | a | 1174.13 | 86.34005  | YES | YES |
| 215 | a | 1178.93 | 128.79872 | YES | YES |
| 216 | a | 1184.73 | 30.39370  | YES | YES |
| 217 | a | 1186.79 | 29.74233  | YES | YES |
| 218 | a | 1190.38 | 17.94767  | YES | YES |
| 219 | a | 1194.76 | 32.71976  | YES | YES |
| 220 | a | 1202.38 | 26.78632  | YES | YES |
| 221 | a | 1205.35 | 78.36470  | YES | YES |
| 222 | a | 1212.41 | 77.95531  | YES | YES |
| 223 | a | 1219.35 | 169.18761 | YES | YES |
| 224 | a | 1223.99 | 255.01860 | YES | YES |
| 225 | a | 1233.66 | 880.32139 | YES | YES |
| 226 | a | 1235.20 | 533.97512 | YES | YES |
| 227 | a | 1241.56 | 90.23519  | YES | YES |
| 228 | a | 1242.74 | 409.97752 | YES | YES |
| 229 | a | 1247.27 | 466.59739 | YES | YES |
| 230 | a | 1247.83 | 94.67871  | YES | YES |
| 231 | a | 1248.45 | 136.09893 | YES | YES |
| 232 | a | 1249.79 | 806.06488 | YES | YES |
| 233 | a | 1253.81 | 353.45224 | YES | YES |

|     |   |         |            |     |     |
|-----|---|---------|------------|-----|-----|
| 234 | a | 1258.00 | 32.83686   | YES | YES |
| 235 | a | 1261.35 | 1167.24761 | YES | YES |
| 236 | a | 1267.93 | 63.09900   | YES | YES |
| 237 | a | 1278.26 | 100.40847  | YES | YES |
| 238 | a | 1299.67 | 29.83870   | YES | YES |
| 239 | a | 1303.63 | 0.48488    | YES | YES |
| 240 | a | 1316.75 | 0.67489    | YES | YES |
| 241 | a | 1331.82 | 121.24909  | YES | YES |
| 242 | a | 1342.91 | 1.47351    | YES | YES |
| 243 | a | 1350.44 | 1.52738    | YES | YES |
| 244 | a | 1354.85 | 143.46254  | YES | YES |
| 245 | a | 1356.69 | 14.88569   | YES | YES |
| 246 | a | 1359.58 | 6.77157    | YES | YES |
| 247 | a | 1366.76 | 1.42898    | YES | YES |
| 248 | a | 1371.91 | 6.84120    | YES | YES |
| 249 | a | 1377.56 | 2.18739    | YES | YES |
| 250 | a | 1382.93 | 0.84087    | YES | YES |
| 251 | a | 1392.69 | 0.62933    | YES | YES |
| 252 | a | 1398.86 | 0.85631    | YES | YES |
| 253 | a | 1410.37 | 0.44590    | YES | YES |
| 254 | a | 1417.94 | 1.11691    | YES | YES |
| 255 | a | 1420.17 | 11.35053   | YES | YES |
| 256 | a | 1423.29 | 2.22994    | YES | YES |
| 257 | a | 1430.02 | 0.53769    | YES | YES |
| 258 | a | 1432.02 | 35.54433   | YES | YES |
| 259 | a | 1438.03 | 37.55582   | YES | YES |
| 260 | a | 1445.12 | 0.89485    | YES | YES |
| 261 | a | 1451.59 | 7.96437    | YES | YES |
| 262 | a | 1453.26 | 6.72358    | YES | YES |
| 263 | a | 1455.51 | 10.09690   | YES | YES |
| 264 | a | 1459.18 | 7.27406    | YES | YES |
| 265 | a | 1463.29 | 12.89878   | YES | YES |
| 266 | a | 1472.85 | 37.79267   | YES | YES |
| 267 | a | 1500.50 | 194.82811  | YES | YES |
| 268 | a | 1510.32 | 178.10199  | YES | YES |
| 269 | a | 1562.79 | 1.06243    | YES | YES |
| 270 | a | 1569.08 | 0.49855    | YES | YES |
| 271 | a | 1611.25 | 8.44081    | YES | YES |
| 272 | a | 1616.67 | 0.90644    | YES | YES |
| 273 | a | 1632.83 | 22.70149   | YES | YES |
| 274 | a | 1633.98 | 11.58255   | YES | YES |
| 275 | a | 2908.89 | 31.78675   | YES | YES |
| 276 | a | 2927.39 | 27.54336   | YES | YES |
| 277 | a | 2943.43 | 26.94216   | YES | YES |
| 278 | a | 2945.25 | 16.26618   | YES | YES |
| 279 | a | 2951.53 | 15.99807   | YES | YES |
| 280 | a | 2952.85 | 19.85898   | YES | YES |
| 281 | a | 2993.95 | 5.64780    | YES | YES |
| 282 | a | 3000.71 | 7.33905    | YES | YES |
| 283 | a | 3016.02 | 6.40909    | YES | YES |
| 284 | a | 3027.51 | 7.24643    | YES | YES |
| 285 | a | 3031.19 | 12.24770   | YES | YES |
| 286 | a | 3036.06 | 2.12583    | YES | YES |
| 287 | a | 3070.68 | 9.19522    | YES | YES |
| 288 | a | 3073.03 | 5.71780    | YES | YES |

|     |   |         |          |     |     |
|-----|---|---------|----------|-----|-----|
| 289 | a | 3078.41 | 15.88130 | YES | YES |
| 290 | a | 3083.62 | 16.47288 | YES | YES |
| 291 | a | 3087.72 | 18.05940 | YES | YES |
| 292 | a | 3101.09 | 9.23539  | YES | YES |
| 293 | a | 3110.72 | 2.64690  | YES | YES |
| 294 | a | 3115.70 | 1.92396  | YES | YES |
| 295 | a | 3124.47 | 8.19284  | YES | YES |
| 296 | a | 3128.45 | 6.64859  | YES | YES |
| 297 | a | 3133.47 | 1.75916  | YES | YES |
| 298 | a | 3138.24 | 0.28137  | YES | YES |
| 299 | a | 3156.74 | 1.80273  | YES | YES |
| 300 | a | 3166.34 | 0.90734  | YES | YES |

H-Sr(HMB)oDFB<sub>2</sub>{f-al}

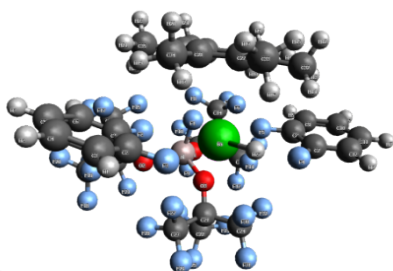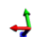

Atomic coordinates

|    |          |          |          |
|----|----------|----------|----------|
| Ba | 0.05835  | -1.11111 | -1.33807 |
| Al | -0.11898 | -0.13094 | 2.18771  |
| F  | -0.13299 | 0.75016  | 0.70887  |
| C  | 3.85272  | -0.61052 | -0.87464 |
| C  | 3.87092  | -1.64638 | -1.81481 |
| C  | 5.05805  | -2.02064 | -2.44415 |
| H  | 5.03936  | -2.83457 | -3.18440 |
| C  | 6.23904  | -1.33367 | -2.11193 |
| H  | 7.18434  | -1.61644 | -2.60065 |
| C  | 6.21800  | -0.29484 | -1.16449 |
| H  | 7.14714  | 0.23645  | -0.90637 |
| C  | 5.01714  | 0.07515  | -0.53337 |
| H  | 4.97216  | 0.87481  | 0.21763  |
| F  | 2.65213  | -0.28310 | -0.31936 |
| F  | 2.69540  | -2.25261 | -2.12001 |
| C  | -3.85770 | -1.60255 | -1.86286 |
| C  | -3.78344 | -0.52933 | -0.96841 |
| C  | -4.92191 | 0.17146  | -0.57586 |
| H  | -4.82805 | 0.99985  | 0.13920  |
| C  | -6.16153 | -0.22288 | -1.11061 |
| H  | -7.07309 | 0.31727  | -0.81139 |
| C  | -6.24182 | -1.29658 | -2.01501 |
| H  | -7.21692 | -1.59749 | -2.42874 |
| C  | -5.08409 | -1.99700 | -2.39901 |
| H  | -5.11482 | -2.84091 | -3.10454 |
| F  | -2.70502 | -2.22632 | -2.19841 |
| F  | -2.55053 | -0.19104 | -0.49998 |
| O  | -1.26555 | 0.44097  | 3.36544  |

|   |          |          |          |
|---|----------|----------|----------|
| C | -2.45517 | 1.05375  | 3.57623  |
| C | -2.60760 | 2.32569  | 2.65983  |
| F | -2.91381 | 1.95230  | 1.38623  |
| F | -3.57813 | 3.15727  | 3.08074  |
| F | -1.45500 | 3.00697  | 2.60519  |
| C | -2.51269 | 1.49622  | 5.08708  |
| F | -2.04833 | 0.51847  | 5.87420  |
| F | -1.75125 | 2.59088  | 5.28459  |
| F | -3.77513 | 1.79152  | 5.46937  |
| C | -3.63373 | 0.05106  | 3.27734  |
| F | -3.78226 | -0.83322 | 4.27766  |
| F | -4.81561 | 0.67950  | 3.09203  |
| F | -3.35697 | -0.64725 | 2.15460  |
| O | 1.50070  | -0.24935 | 2.83785  |
| C | 2.42475  | 0.45297  | 3.53994  |
| C | 2.65366  | 1.86706  | 2.88888  |
| F | 1.46635  | 2.42743  | 2.58233  |
| F | 3.32763  | 2.71292  | 3.68515  |
| F | 3.34598  | 1.75486  | 1.72485  |
| C | 3.76708  | -0.36830 | 3.51007  |
| F | 3.70398  | -1.41517 | 4.35229  |
| F | 3.98899  | -0.85451 | 2.27311  |
| F | 4.83171  | 0.38763  | 3.85507  |
| C | 1.96726  | 0.64745  | 5.03816  |
| F | 1.42717  | -0.48550 | 5.50646  |
| F | 2.99807  | 0.99299  | 5.83872  |
| F | 1.03394  | 1.61893  | 5.12121  |
| O | -0.46263 | -1.74186 | 1.43342  |
| C | -0.41387 | -3.05562 | 1.81750  |
| C | -0.85541 | -3.25672 | 3.31254  |
| F | -2.19149 | -3.17196 | 3.43629  |
| F | -0.46327 | -4.45496 | 3.78508  |
| F | -0.30729 | -2.29363 | 4.07511  |
| C | 1.05682  | -3.59869 | 1.63058  |
| F | 1.57707  | -3.07435 | 0.47780  |
| F | 1.85063  | -3.21260 | 2.63431  |
| F | 1.11358  | -4.93450 | 1.52343  |
| C | -1.39034 | -3.84396 | 0.87354  |
| F | -0.87557 | -3.83457 | -0.39735 |
| F | -1.56933 | -5.11698 | 1.23893  |
| F | -2.58354 | -3.23604 | 0.80923  |
| C | -1.03848 | 1.97885  | -2.57723 |
| C | -0.97706 | 1.08454  | -3.68566 |
| C | 0.28684  | 0.71570  | -4.23200 |
| C | 1.49245  | 1.13116  | -3.59705 |
| C | 1.43087  | 2.00205  | -2.47039 |
| C | 0.16767  | 2.42602  | -1.96768 |
| C | -2.35615 | 2.52188  | -2.06182 |
| H | -2.38501 | 3.62948  | -2.16841 |
| H | -2.50251 | 2.29949  | -0.98507 |
| H | -3.22949 | 2.12201  | -2.60993 |
| C | -2.22180 | 0.49111  | -4.31702 |
| H | -2.47538 | 0.98548  | -5.28376 |
| H | -3.11321 | 0.57572  | -3.66529 |
| H | -2.06701 | -0.58882 | -4.52843 |



|   |          |          |          |
|---|----------|----------|----------|
| C | 0.32964  | -0.13024 | -5.48583 |
| H | -0.48634 | 0.14360  | -6.18677 |
| H | 0.20598  | -1.20628 | -5.20807 |
| H | 1.28521  | -0.01822 | -6.03474 |
| C | 2.81146  | 0.62739  | -4.15222 |
| H | 2.74994  | -0.45406 | -4.39587 |
| H | 3.65104  | 0.75553  | -3.44295 |
| H | 3.09241  | 1.15756  | -5.09171 |
| C | 2.67374  | 2.56260  | -1.81093 |
| H | 3.61141  | 2.21509  | -2.28281 |
| H | 2.72050  | 2.30055  | -0.73277 |
| H | 2.67283  | 3.67451  | -1.86293 |
| C | 0.13121  | 3.39242  | -0.80453 |
| H | 0.37297  | 4.42891  | -1.14018 |
| H | 0.86722  | 3.11980  | -0.02317 |
| H | -0.85391 | 3.42184  | -0.30569 |
| H | -0.03234 | -2.39900 | -3.35049 |

### Vibrational analysis

| mode | symmetry | wave number<br>cm <sup>**</sup> (-1) | IR intensity<br>km/mol | selection rules |       |
|------|----------|--------------------------------------|------------------------|-----------------|-------|
|      |          |                                      |                        | IR              | RAMAN |
| 1    |          | -0.00                                | 0.00000                | -               | -     |
| 2    |          | -0.00                                | 0.00000                | -               | -     |
| 3    |          | -0.00                                | 0.00000                | -               | -     |
| 4    |          | -0.00                                | 0.00000                | -               | -     |
| 5    |          | 0.00                                 | 0.00000                | -               | -     |
| 6    |          | 0.00                                 | 0.00000                | -               | -     |
| 7    | a        | 13.15                                | 0.02263                | YES             | YES   |
| 8    | a        | 18.51                                | 0.17355                | YES             | YES   |
| 9    | a        | 19.85                                | 1.15314                | YES             | YES   |
| 10   | a        | 21.11                                | 0.97693                | YES             | YES   |
| 11   | a        | 22.61                                | 0.30008                | YES             | YES   |
| 12   | a        | 25.83                                | 0.06622                | YES             | YES   |
| 13   | a        | 28.20                                | 0.02676                | YES             | YES   |
| 14   | a        | 29.05                                | 0.11980                | YES             | YES   |
| 15   | a        | 31.35                                | 0.11641                | YES             | YES   |
| 16   | a        | 33.93                                | 0.92143                | YES             | YES   |
| 17   | a        | 34.83                                | 0.16332                | YES             | YES   |
| 18   | a        | 37.30                                | 0.11544                | YES             | YES   |
| 19   | a        | 38.72                                | 1.45192                | YES             | YES   |
| 20   | a        | 40.92                                | 0.45210                | YES             | YES   |
| 21   | a        | 43.07                                | 0.41273                | YES             | YES   |
| 22   | a        | 44.99                                | 0.91226                | YES             | YES   |
| 23   | a        | 45.75                                | 1.14634                | YES             | YES   |
| 24   | a        | 48.68                                | 0.69189                | YES             | YES   |
| 25   | a        | 51.59                                | 0.28407                | YES             | YES   |
| 26   | a        | 58.32                                | 0.07698                | YES             | YES   |
| 27   | a        | 59.46                                | 0.18880                | YES             | YES   |
| 28   | a        | 63.26                                | 0.63280                | YES             | YES   |
| 29   | a        | 63.78                                | 0.74042                | YES             | YES   |
| 30   | a        | 64.82                                | 0.53841                | YES             | YES   |
| 31   | a        | 67.69                                | 0.72874                | YES             | YES   |
| 32   | a        | 68.19                                | 0.64058                | YES             | YES   |
| 33   | a        | 71.58                                | 0.08982                | YES             | YES   |

|    |   |        |          |     |     |
|----|---|--------|----------|-----|-----|
| 34 | a | 72.89  | 0.11497  | YES | YES |
| 35 | a | 73.90  | 0.32915  | YES | YES |
| 36 | a | 75.54  | 0.07312  | YES | YES |
| 37 | a | 77.96  | 0.30156  | YES | YES |
| 38 | a | 79.24  | 0.34737  | YES | YES |
| 39 | a | 81.44  | 0.40707  | YES | YES |
| 40 | a | 83.67  | 0.66055  | YES | YES |
| 41 | a | 85.60  | 1.31582  | YES | YES |
| 42 | a | 86.49  | 0.65415  | YES | YES |
| 43 | a | 93.66  | 1.08971  | YES | YES |
| 44 | a | 95.07  | 3.09480  | YES | YES |
| 45 | a | 96.91  | 7.65353  | YES | YES |
| 46 | a | 100.17 | 7.42707  | YES | YES |
| 47 | a | 102.10 | 2.70563  | YES | YES |
| 48 | a | 104.84 | 0.83834  | YES | YES |
| 49 | a | 109.39 | 13.18065 | YES | YES |
| 50 | a | 115.72 | 1.36448  | YES | YES |
| 51 | a | 120.75 | 0.10246  | YES | YES |
| 52 | a | 134.95 | 0.24366  | YES | YES |
| 53 | a | 140.72 | 2.58587  | YES | YES |
| 54 | a | 151.95 | 1.53842  | YES | YES |
| 55 | a | 154.20 | 0.42297  | YES | YES |
| 56 | a | 156.39 | 0.05873  | YES | YES |
| 57 | a | 160.21 | 0.43241  | YES | YES |
| 58 | a | 163.10 | 2.03588  | YES | YES |
| 59 | a | 166.87 | 0.73684  | YES | YES |
| 60 | a | 170.44 | 2.37901  | YES | YES |
| 61 | a | 174.80 | 13.84815 | YES | YES |
| 62 | a | 177.96 | 5.83240  | YES | YES |
| 63 | a | 185.01 | 2.05349  | YES | YES |
| 64 | a | 189.62 | 0.10748  | YES | YES |
| 65 | a | 194.29 | 10.61508 | YES | YES |
| 66 | a | 194.95 | 0.04265  | YES | YES |
| 67 | a | 195.44 | 0.41437  | YES | YES |
| 68 | a | 199.18 | 0.10498  | YES | YES |
| 69 | a | 213.36 | 1.75366  | YES | YES |
| 70 | a | 220.73 | 28.50262 | YES | YES |
| 71 | a | 238.84 | 7.04208  | YES | YES |
| 72 | a | 248.04 | 6.21684  | YES | YES |
| 73 | a | 269.37 | 1.98750  | YES | YES |
| 74 | a | 273.71 | 3.05196  | YES | YES |
| 75 | a | 277.89 | 1.69278  | YES | YES |
| 76 | a | 282.20 | 2.33007  | YES | YES |
| 77 | a | 284.11 | 0.18047  | YES | YES |
| 78 | a | 285.19 | 0.16962  | YES | YES |
| 79 | a | 287.28 | 2.33741  | YES | YES |
| 80 | a | 290.58 | 0.22756  | YES | YES |
| 81 | a | 291.37 | 1.73351  | YES | YES |
| 82 | a | 291.74 | 1.25275  | YES | YES |
| 83 | a | 292.45 | 1.70807  | YES | YES |
| 84 | a | 299.44 | 2.92347  | YES | YES |
| 85 | a | 302.12 | 1.49922  | YES | YES |
| 86 | a | 306.41 | 7.05434  | YES | YES |
| 87 | a | 307.06 | 4.58417  | YES | YES |
| 88 | a | 313.68 | 1.92961  | YES | YES |

|     |   |        |           |     |     |
|-----|---|--------|-----------|-----|-----|
| 89  | a | 317.94 | 0.45383   | YES | YES |
| 90  | a | 320.14 | 2.31344   | YES | YES |
| 91  | a | 321.18 | 1.95342   | YES | YES |
| 92  | a | 324.42 | 1.05358   | YES | YES |
| 93  | a | 326.65 | 1.27846   | YES | YES |
| 94  | a | 328.95 | 0.15708   | YES | YES |
| 95  | a | 330.81 | 0.65986   | YES | YES |
| 96  | a | 348.25 | 0.69139   | YES | YES |
| 97  | a | 350.31 | 6.08632   | YES | YES |
| 98  | a | 355.21 | 1.02148   | YES | YES |
| 99  | a | 358.23 | 6.00991   | YES | YES |
| 100 | a | 360.37 | 6.56001   | YES | YES |
| 101 | a | 367.88 | 28.93711  | YES | YES |
| 102 | a | 373.57 | 0.87155   | YES | YES |
| 103 | a | 384.63 | 39.57990  | YES | YES |
| 104 | a | 396.54 | 0.10542   | YES | YES |
| 105 | a | 405.91 | 3.04699   | YES | YES |
| 106 | a | 413.99 | 1.00884   | YES | YES |
| 107 | a | 423.39 | 250.70422 | YES | YES |
| 108 | a | 435.63 | 2.79145   | YES | YES |
| 109 | a | 437.71 | 109.57495 | YES | YES |
| 110 | a | 440.29 | 5.27832   | YES | YES |
| 111 | a | 443.69 | 8.32213   | YES | YES |
| 112 | a | 447.80 | 17.13023  | YES | YES |
| 113 | a | 448.37 | 8.54050   | YES | YES |
| 114 | a | 449.07 | 2.00475   | YES | YES |
| 115 | a | 452.09 | 50.23100  | YES | YES |
| 116 | a | 460.09 | 230.31421 | YES | YES |
| 117 | a | 465.39 | 157.67109 | YES | YES |
| 118 | a | 514.64 | 7.05648   | YES | YES |
| 119 | a | 516.16 | 4.35172   | YES | YES |
| 120 | a | 518.03 | 1.03286   | YES | YES |
| 121 | a | 519.03 | 5.52474   | YES | YES |
| 122 | a | 520.15 | 4.62260   | YES | YES |
| 123 | a | 520.70 | 4.77376   | YES | YES |
| 124 | a | 521.50 | 1.99617   | YES | YES |
| 125 | a | 524.04 | 0.37101   | YES | YES |
| 126 | a | 524.83 | 2.51859   | YES | YES |
| 127 | a | 527.23 | 1.40860   | YES | YES |
| 128 | a | 540.41 | 3.29548   | YES | YES |
| 129 | a | 542.64 | 3.86759   | YES | YES |
| 130 | a | 545.26 | 13.87315  | YES | YES |
| 131 | a | 546.44 | 1.19616   | YES | YES |
| 132 | a | 547.40 | 0.52759   | YES | YES |
| 133 | a | 552.37 | 3.24251   | YES | YES |
| 134 | a | 553.48 | 0.88218   | YES | YES |
| 135 | a | 553.68 | 0.09841   | YES | YES |
| 136 | a | 554.18 | 0.20564   | YES | YES |
| 137 | a | 555.03 | 1.59595   | YES | YES |
| 138 | a | 555.36 | 1.15762   | YES | YES |
| 139 | a | 561.04 | 21.30205  | YES | YES |
| 140 | a | 561.28 | 2.98771   | YES | YES |
| 141 | a | 562.24 | 18.11052  | YES | YES |
| 142 | a | 565.13 | 27.50151  | YES | YES |
| 143 | a | 566.87 | 0.19302   | YES | YES |

|     |   |         |           |     |     |
|-----|---|---------|-----------|-----|-----|
| 144 | a | 572.09  | 1.05757   | YES | YES |
| 145 | a | 573.08  | 0.34921   | YES | YES |
| 146 | a | 586.59  | 1.48172   | YES | YES |
| 147 | a | 680.60  | 0.11123   | YES | YES |
| 148 | a | 683.07  | 0.06053   | YES | YES |
| 149 | a | 702.08  | 34.87004  | YES | YES |
| 150 | a | 705.67  | 25.43782  | YES | YES |
| 151 | a | 706.55  | 29.70281  | YES | YES |
| 152 | a | 707.03  | 0.93956   | YES | YES |
| 153 | a | 707.16  | 31.90595  | YES | YES |
| 154 | a | 708.97  | 35.21778  | YES | YES |
| 155 | a | 709.51  | 28.79048  | YES | YES |
| 156 | a | 712.15  | 100.72197 | YES | YES |
| 157 | a | 726.90  | 7.05396   | YES | YES |
| 158 | a | 738.12  | 2.82412   | YES | YES |
| 159 | a | 742.35  | 17.11079  | YES | YES |
| 160 | a | 745.06  | 31.68601  | YES | YES |
| 161 | a | 745.66  | 125.30704 | YES | YES |
| 162 | a | 760.54  | 59.57905  | YES | YES |
| 163 | a | 763.67  | 36.90215  | YES | YES |
| 164 | a | 779.76  | 19.81605  | YES | YES |
| 165 | a | 793.36  | 0.03004   | YES | YES |
| 166 | a | 802.13  | 3.15301   | YES | YES |
| 167 | a | 827.18  | 9.65037   | YES | YES |
| 168 | a | 828.37  | 63.44658  | YES | YES |
| 169 | a | 829.17  | 15.56672  | YES | YES |
| 170 | a | 840.51  | 1.52745   | YES | YES |
| 171 | a | 841.24  | 0.59150   | YES | YES |
| 172 | a | 853.16  | 39.55417  | YES | YES |
| 173 | a | 925.35  | 3.91887   | YES | YES |
| 174 | a | 925.95  | 6.61269   | YES | YES |
| 175 | a | 950.12  | 54.04562  | YES | YES |
| 176 | a | 953.88  | 80.38966  | YES | YES |
| 177 | a | 954.54  | 1.95757   | YES | YES |
| 178 | a | 959.21  | 128.82008 | YES | YES |
| 179 | a | 960.00  | 178.09975 | YES | YES |
| 180 | a | 964.51  | 7.37288   | YES | YES |
| 181 | a | 965.19  | 36.35358  | YES | YES |
| 182 | a | 966.52  | 203.71761 | YES | YES |
| 183 | a | 966.96  | 345.70564 | YES | YES |
| 184 | a | 967.25  | 22.75346  | YES | YES |
| 185 | a | 974.10  | 4.23279   | YES | YES |
| 186 | a | 983.07  | 65.79534  | YES | YES |
| 187 | a | 990.12  | 409.00306 | YES | YES |
| 188 | a | 1005.16 | 34.77622  | YES | YES |
| 189 | a | 1009.25 | 0.44330   | YES | YES |
| 190 | a | 1020.87 | 8.60424   | YES | YES |
| 191 | a | 1021.70 | 8.72071   | YES | YES |
| 192 | a | 1030.30 | 2.13548   | YES | YES |
| 193 | a | 1034.23 | 0.83079   | YES | YES |
| 194 | a | 1035.94 | 20.88751  | YES | YES |
| 195 | a | 1052.26 | 15.29740  | YES | YES |
| 196 | a | 1054.28 | 19.22563  | YES | YES |
| 197 | a | 1073.48 | 6.09399   | YES | YES |
| 198 | a | 1074.71 | 0.72137   | YES | YES |

|     |   |         |            |     |     |
|-----|---|---------|------------|-----|-----|
| 199 | a | 1076.87 | 0.10110    | YES | YES |
| 200 | a | 1084.44 | 2.19648    | YES | YES |
| 201 | a | 1086.31 | 4.35829    | YES | YES |
| 202 | a | 1086.95 | 10.20608   | YES | YES |
| 203 | a | 1093.17 | 3.15206    | YES | YES |
| 204 | a | 1096.84 | 27.78499   | YES | YES |
| 205 | a | 1131.25 | 50.79043   | YES | YES |
| 206 | a | 1134.30 | 2.21450    | YES | YES |
| 207 | a | 1134.86 | 2.32907    | YES | YES |
| 208 | a | 1138.05 | 20.82329   | YES | YES |
| 209 | a | 1144.15 | 61.53095   | YES | YES |
| 210 | a | 1154.56 | 15.96031   | YES | YES |
| 211 | a | 1159.71 | 20.74487   | YES | YES |
| 212 | a | 1168.35 | 35.82474   | YES | YES |
| 213 | a | 1170.44 | 13.62462   | YES | YES |
| 214 | a | 1174.02 | 4.73397    | YES | YES |
| 215 | a | 1177.94 | 123.90209  | YES | YES |
| 216 | a | 1183.43 | 29.49644   | YES | YES |
| 217 | a | 1188.08 | 35.82756   | YES | YES |
| 218 | a | 1190.35 | 4.08244    | YES | YES |
| 219 | a | 1195.86 | 31.15447   | YES | YES |
| 220 | a | 1203.16 | 18.24923   | YES | YES |
| 221 | a | 1208.43 | 126.57840  | YES | YES |
| 222 | a | 1212.73 | 67.26307   | YES | YES |
| 223 | a | 1219.15 | 247.91114  | YES | YES |
| 224 | a | 1223.02 | 222.17719  | YES | YES |
| 225 | a | 1230.50 | 188.49851  | YES | YES |
| 226 | a | 1234.34 | 1309.45747 | YES | YES |
| 227 | a | 1241.75 | 507.88965  | YES | YES |
| 228 | a | 1246.33 | 789.62737  | YES | YES |
| 229 | a | 1248.17 | 42.97873   | YES | YES |
| 230 | a | 1248.58 | 23.39021   | YES | YES |
| 231 | a | 1249.42 | 197.03140  | YES | YES |
| 232 | a | 1250.15 | 89.10972   | YES | YES |
| 233 | a | 1255.63 | 239.73310  | YES | YES |
| 234 | a | 1257.14 | 552.86868  | YES | YES |
| 235 | a | 1260.80 | 531.98679  | YES | YES |
| 236 | a | 1263.61 | 590.98221  | YES | YES |
| 237 | a | 1269.51 | 82.99092   | YES | YES |
| 238 | a | 1301.77 | 14.20918   | YES | YES |
| 239 | a | 1307.51 | 0.93053    | YES | YES |
| 240 | a | 1315.28 | 0.19654    | YES | YES |
| 241 | a | 1332.58 | 146.80199  | YES | YES |
| 242 | a | 1339.55 | 6.69643    | YES | YES |
| 243 | a | 1346.28 | 110.81291  | YES | YES |
| 244 | a | 1354.44 | 0.10257    | YES | YES |
| 245 | a | 1361.39 | 4.22958    | YES | YES |
| 246 | a | 1363.87 | 2.72466    | YES | YES |
| 247 | a | 1367.23 | 0.95230    | YES | YES |
| 248 | a | 1374.55 | 5.78684    | YES | YES |
| 249 | a | 1381.37 | 0.40219    | YES | YES |
| 250 | a | 1381.68 | 0.41227    | YES | YES |
| 251 | a | 1391.64 | 1.21562    | YES | YES |
| 252 | a | 1397.03 | 2.40813    | YES | YES |
| 253 | a | 1412.48 | 2.36014    | YES | YES |

|     |   |         |           |     |     |
|-----|---|---------|-----------|-----|-----|
| 254 | a | 1414.63 | 4.35262   | YES | YES |
| 255 | a | 1418.68 | 1.10365   | YES | YES |
| 256 | a | 1425.34 | 10.18776  | YES | YES |
| 257 | a | 1430.48 | 27.60736  | YES | YES |
| 258 | a | 1433.75 | 3.14956   | YES | YES |
| 259 | a | 1440.72 | 32.29024  | YES | YES |
| 260 | a | 1447.40 | 3.13115   | YES | YES |
| 261 | a | 1452.76 | 18.67627  | YES | YES |
| 262 | a | 1456.98 | 11.69873  | YES | YES |
| 263 | a | 1458.24 | 12.33087  | YES | YES |
| 264 | a | 1458.33 | 4.47332   | YES | YES |
| 265 | a | 1467.57 | 19.23810  | YES | YES |
| 266 | a | 1469.91 | 26.99980  | YES | YES |
| 267 | a | 1500.35 | 293.25568 | YES | YES |
| 268 | a | 1503.02 | 99.91075  | YES | YES |
| 269 | a | 1560.19 | 0.07859   | YES | YES |
| 270 | a | 1566.51 | 0.17015   | YES | YES |
| 271 | a | 1616.24 | 0.29951   | YES | YES |
| 272 | a | 1616.60 | 2.20903   | YES | YES |
| 273 | a | 1630.22 | 16.72675  | YES | YES |
| 274 | a | 1631.47 | 13.82736  | YES | YES |
| 275 | a | 2891.80 | 45.05511  | YES | YES |
| 276 | a | 2934.69 | 24.84282  | YES | YES |
| 277 | a | 2935.05 | 20.19373  | YES | YES |
| 278 | a | 2941.15 | 17.62166  | YES | YES |
| 279 | a | 2952.63 | 16.78684  | YES | YES |
| 280 | a | 2957.32 | 16.06842  | YES | YES |
| 281 | a | 3010.11 | 10.56818  | YES | YES |
| 282 | a | 3014.67 | 7.00757   | YES | YES |
| 283 | a | 3019.29 | 3.80605   | YES | YES |
| 284 | a | 3022.90 | 6.47025   | YES | YES |
| 285 | a | 3037.08 | 5.16773   | YES | YES |
| 286 | a | 3046.74 | 3.57393   | YES | YES |
| 287 | a | 3058.54 | 21.47381  | YES | YES |
| 288 | a | 3060.88 | 1.80378   | YES | YES |
| 289 | a | 3068.89 | 5.37980   | YES | YES |
| 290 | a | 3081.47 | 20.95694  | YES | YES |
| 291 | a | 3082.71 | 11.47620  | YES | YES |
| 292 | a | 3098.18 | 4.08810   | YES | YES |
| 293 | a | 3113.79 | 2.29935   | YES | YES |
| 294 | a | 3114.61 | 2.17665   | YES | YES |
| 295 | a | 3127.02 | 7.94342   | YES | YES |
| 296 | a | 3127.64 | 7.32113   | YES | YES |
| 297 | a | 3137.38 | 0.32276   | YES | YES |
| 298 | a | 3138.08 | 0.27902   | YES | YES |
| 299 | a | 3159.51 | 2.09183   | YES | YES |
| 300 | a | 3164.88 | 2.65973   | YES | YES |

H-Ba(HMB)oDFB<sub>2</sub>{f-aL}

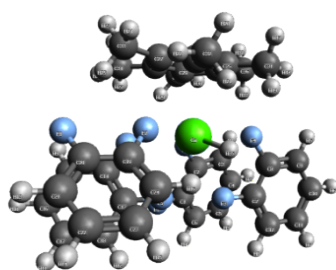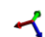

### Atomic coordinates

|    |          |          |          |
|----|----------|----------|----------|
| Ca | -0.57705 | -0.09681 | -0.18652 |
| C  | 2.03162  | 1.19455  | 2.93716  |
| C  | 1.22821  | 2.01449  | 2.13435  |
| C  | 0.62727  | 3.16989  | 2.62688  |
| H  | 0.00673  | 3.78421  | 1.95772  |
| C  | 0.82836  | 3.50834  | 3.97617  |
| H  | 0.35726  | 4.41513  | 4.38393  |
| C  | 1.62122  | 2.68820  | 4.79646  |
| H  | 1.77571  | 2.95179  | 5.85407  |
| C  | 2.22911  | 1.53032  | 4.28002  |
| H  | 2.85976  | 0.87741  | 4.90275  |
| F  | 2.58027  | 0.08876  | 2.40624  |
| F  | 0.99433  | 1.61904  | 0.83584  |
| C  | -1.36738 | 0.60139  | 3.27835  |
| C  | -2.09906 | 1.55195  | 2.56196  |
| C  | -2.90232 | 2.48815  | 3.20623  |
| H  | -3.46771 | 3.22221  | 2.61276  |
| C  | -2.95403 | 2.46137  | 4.61235  |
| H  | -3.58504 | 3.19066  | 5.14321  |
| C  | -2.21064 | 1.51344  | 5.33664  |
| H  | -2.25742 | 1.50064  | 6.43639  |
| C  | -1.40730 | 0.57008  | 4.67005  |
| H  | -0.81564 | -0.18283 | 5.21153  |
| F  | -0.58582 | -0.25966 | 2.57236  |
| F  | -1.95426 | 1.56680  | 1.20148  |
| C  | 1.96447  | -2.35917 | 0.58545  |
| C  | 2.60806  | -1.61101 | -0.40369 |
| C  | 3.79161  | -2.05568 | -0.98482 |
| H  | 4.27282  | -1.45576 | -1.77135 |
| C  | 4.32326  | -3.28289 | -0.54718 |
| H  | 5.25619  | -3.65552 | -0.99711 |
| C  | 3.67344  | -4.03359 | 0.44850  |
| H  | 4.09670  | -4.99490 | 0.77757  |
| C  | 2.47835  | -3.57302 | 1.02972  |
| H  | 1.93686  | -4.14506 | 1.79716  |
| F  | 0.78480  | -1.86698 | 1.07280  |
| F  | 2.00679  | -0.44757 | -0.80096 |
| C  | -0.03138 | -3.38545 | -1.45694 |
| C  | 1.00420  | -4.05020 | -2.12684 |
| C  | 1.22927  | -5.40484 | -1.86712 |
| H  | 2.04510  | -5.91898 | -2.39749 |
| C  | 0.41034  | -6.06811 | -0.93617 |

|   |          |          |          |
|---|----------|----------|----------|
| H | 0.58449  | -7.13592 | -0.73101 |
| C | -0.62751 | -5.38466 | -0.27714 |
| H | -1.26874 | -5.91428 | 0.44437  |
| C | -0.85935 | -4.02201 | -0.53727 |
| H | -1.64644 | -3.42680 | -0.04196 |
| F | -0.18072 | -2.03655 | -1.69684 |
| F | 1.77625  | -3.36968 | -2.99513 |
| C | -2.28975 | 1.46770  | -1.93640 |
| C | -1.82033 | 0.40908  | -2.77973 |
| C | -0.49302 | 0.44257  | -3.29403 |
| C | 0.40983  | 1.44655  | -2.83656 |
| C | -0.05295 | 2.50074  | -2.00153 |
| C | -1.42139 | 2.54736  | -1.59736 |
| C | -3.72638 | 1.39323  | -1.46538 |
| H | -4.43014 | 1.39930  | -2.32715 |
| H | -4.01036 | 2.22386  | -0.79488 |
| H | -3.89673 | 0.44701  | -0.90606 |
| C | -2.78357 | -0.70728 | -3.11971 |
| H | -3.62604 | -0.33887 | -3.74793 |
| H | -3.22348 | -1.12967 | -2.19067 |
| H | -2.29966 | -1.54229 | -3.65756 |
| C | -0.01289 | -0.54015 | -4.34082 |
| H | 0.51497  | -0.00507 | -5.15861 |
| H | -0.84595 | -1.09876 | -4.80618 |
| H | 0.69703  | -1.28842 | -3.92690 |
| C | 1.84641  | 1.43575  | -3.31186 |
| H | 2.19380  | 0.41529  | -3.56442 |
| H | 2.53973  | 1.84481  | -2.55055 |
| H | 1.96864  | 2.06146  | -4.22690 |
| C | 0.90964  | 3.60412  | -1.61503 |
| H | 1.84022  | 3.19648  | -1.16645 |
| H | 0.48049  | 4.31576  | -0.88617 |
| H | 1.21982  | 4.19215  | -2.50854 |
| C | -1.91817 | 3.77066  | -0.85288 |
| H | -1.71182 | 4.69207  | -1.43945 |
| H | -1.42120 | 3.89659  | 0.13394  |
| H | -3.00715 | 3.74315  | -0.66853 |
| H | -2.21468 | -1.16607 | 0.20932  |

### Vibrational analysis

| mode | symmetry | wave number<br>cm <sup>**</sup> (-1) | IR intensity<br>km/mol | selection rules |       |
|------|----------|--------------------------------------|------------------------|-----------------|-------|
|      |          |                                      |                        | IR              | RAMAN |
| 1    |          | -0.00                                | 0.00000                | -               | -     |
| 2    |          | -0.00                                | 0.00000                | -               | -     |
| 3    |          | -0.00                                | 0.00000                | -               | -     |
| 4    |          | -0.00                                | 0.00000                | -               | -     |
| 5    |          | -0.00                                | 0.00000                | -               | -     |
| 6    |          | 0.00                                 | 0.00000                | -               | -     |
| 7    | a        | 10.57                                | 0.08806                | YES             | YES   |
| 8    | a        | 15.00                                | 0.65859                | YES             | YES   |
| 9    | a        | 18.59                                | 0.07181                | YES             | YES   |
| 10   | a        | 25.94                                | 1.29842                | YES             | YES   |
| 11   | a        | 28.32                                | 0.74993                | YES             | YES   |
| 12   | a        | 32.41                                | 0.33237                | YES             | YES   |



|    |   |        |          |     |     |
|----|---|--------|----------|-----|-----|
| 13 | a | 35.07  | 0.48770  | YES | YES |
| 14 | a | 41.55  | 0.08611  | YES | YES |
| 15 | a | 44.23  | 0.88633  | YES | YES |
| 16 | a | 46.97  | 0.33469  | YES | YES |
| 17 | a | 48.08  | 0.09423  | YES | YES |
| 18 | a | 56.28  | 0.35191  | YES | YES |
| 19 | a | 57.21  | 0.34271  | YES | YES |
| 20 | a | 61.36  | 0.06828  | YES | YES |
| 21 | a | 66.30  | 0.61983  | YES | YES |
| 22 | a | 68.24  | 0.78082  | YES | YES |
| 23 | a | 72.85  | 1.42015  | YES | YES |
| 24 | a | 77.65  | 0.98383  | YES | YES |
| 25 | a | 78.17  | 1.47858  | YES | YES |
| 26 | a | 81.54  | 0.05656  | YES | YES |
| 27 | a | 85.55  | 0.07273  | YES | YES |
| 28 | a | 87.34  | 0.29020  | YES | YES |
| 29 | a | 88.37  | 0.70193  | YES | YES |
| 30 | a | 92.98  | 0.54382  | YES | YES |
| 31 | a | 96.65  | 0.77556  | YES | YES |
| 32 | a | 108.79 | 0.14886  | YES | YES |
| 33 | a | 122.21 | 5.34808  | YES | YES |
| 34 | a | 125.20 | 4.15775  | YES | YES |
| 35 | a | 127.31 | 3.70999  | YES | YES |
| 36 | a | 130.77 | 1.38400  | YES | YES |
| 37 | a | 144.40 | 0.23768  | YES | YES |
| 38 | a | 155.03 | 29.36721 | YES | YES |
| 39 | a | 171.44 | 44.28980 | YES | YES |
| 40 | a | 182.75 | 12.25079 | YES | YES |
| 41 | a | 193.39 | 3.61861  | YES | YES |
| 42 | a | 199.04 | 3.91574  | YES | YES |
| 43 | a | 202.37 | 2.30600  | YES | YES |
| 44 | a | 203.89 | 3.09713  | YES | YES |
| 45 | a | 207.92 | 1.28781  | YES | YES |
| 46 | a | 211.89 | 0.16587  | YES | YES |
| 47 | a | 244.43 | 13.43012 | YES | YES |
| 48 | a | 279.77 | 0.76285  | YES | YES |
| 49 | a | 288.11 | 8.07714  | YES | YES |
| 50 | a | 289.95 | 1.05309  | YES | YES |
| 51 | a | 296.65 | 10.98536 | YES | YES |
| 52 | a | 297.76 | 0.69987  | YES | YES |
| 53 | a | 301.21 | 0.33111  | YES | YES |
| 54 | a | 304.28 | 5.27117  | YES | YES |
| 55 | a | 309.62 | 1.28187  | YES | YES |
| 56 | a | 327.23 | 0.73102  | YES | YES |
| 57 | a | 346.20 | 0.85378  | YES | YES |
| 58 | a | 370.18 | 4.77253  | YES | YES |
| 59 | a | 372.86 | 3.25309  | YES | YES |
| 60 | a | 398.80 | 0.07986  | YES | YES |
| 61 | a | 403.12 | 0.07082  | YES | YES |
| 62 | a | 431.78 | 45.32201 | YES | YES |
| 63 | a | 432.40 | 28.81360 | YES | YES |
| 64 | a | 433.76 | 5.24214  | YES | YES |
| 65 | a | 435.18 | 8.77677  | YES | YES |
| 66 | a | 439.27 | 2.30869  | YES | YES |
| 67 | a | 442.13 | 1.95846  | YES | YES |

|     |   |        |           |     |     |
|-----|---|--------|-----------|-----|-----|
| 68  | a | 443.32 | 18.01090  | YES | YES |
| 69  | a | 444.14 | 6.81277   | YES | YES |
| 70  | a | 446.08 | 1.43808   | YES | YES |
| 71  | a | 450.04 | 124.96570 | YES | YES |
| 72  | a | 452.72 | 4.79612   | YES | YES |
| 73  | a | 460.86 | 74.27238  | YES | YES |
| 74  | a | 534.60 | 3.66927   | YES | YES |
| 75  | a | 537.59 | 3.12934   | YES | YES |
| 76  | a | 538.03 | 13.94830  | YES | YES |
| 77  | a | 538.51 | 6.95591   | YES | YES |
| 78  | a | 542.77 | 2.80532   | YES | YES |
| 79  | a | 543.82 | 0.76398   | YES | YES |
| 80  | a | 545.06 | 2.27526   | YES | YES |
| 81  | a | 545.58 | 0.87712   | YES | YES |
| 82  | a | 552.10 | 2.10464   | YES | YES |
| 83  | a | 558.59 | 19.66547  | YES | YES |
| 84  | a | 560.62 | 7.62678   | YES | YES |
| 85  | a | 561.17 | 9.53771   | YES | YES |
| 86  | a | 563.12 | 11.86851  | YES | YES |
| 87  | a | 564.89 | 0.00943   | YES | YES |
| 88  | a | 570.43 | 0.10681   | YES | YES |
| 89  | a | 572.16 | 0.53158   | YES | YES |
| 90  | a | 585.80 | 5.05665   | YES | YES |
| 91  | a | 603.30 | 385.15167 | YES | YES |
| 92  | a | 674.49 | 0.40315   | YES | YES |
| 93  | a | 677.02 | 0.15664   | YES | YES |
| 94  | a | 677.30 | 0.31664   | YES | YES |
| 95  | a | 680.93 | 0.15426   | YES | YES |
| 96  | a | 693.41 | 1.54703   | YES | YES |
| 97  | a | 742.51 | 108.81465 | YES | YES |
| 98  | a | 744.54 | 92.71073  | YES | YES |
| 99  | a | 746.85 | 1.62724   | YES | YES |
| 100 | a | 754.17 | 55.68274  | YES | YES |
| 101 | a | 754.79 | 37.83253  | YES | YES |
| 102 | a | 757.01 | 58.16954  | YES | YES |
| 103 | a | 758.30 | 87.43951  | YES | YES |
| 104 | a | 762.55 | 49.15192  | YES | YES |
| 105 | a | 792.22 | 0.44408   | YES | YES |
| 106 | a | 801.36 | 3.39992   | YES | YES |
| 107 | a | 821.83 | 4.50019   | YES | YES |
| 108 | a | 825.18 | 10.21286  | YES | YES |
| 109 | a | 828.48 | 22.32449  | YES | YES |
| 110 | a | 829.21 | 17.33940  | YES | YES |
| 111 | a | 833.14 | 1.13848   | YES | YES |
| 112 | a | 834.45 | 1.70391   | YES | YES |
| 113 | a | 838.23 | 0.54749   | YES | YES |
| 114 | a | 854.58 | 0.48408   | YES | YES |
| 115 | a | 920.75 | 4.31674   | YES | YES |
| 116 | a | 923.22 | 0.08296   | YES | YES |
| 117 | a | 923.64 | 2.89494   | YES | YES |
| 118 | a | 943.04 | 5.68675   | YES | YES |
| 119 | a | 952.61 | 2.55091   | YES | YES |
| 120 | a | 962.37 | 0.94897   | YES | YES |
| 121 | a | 967.52 | 0.12625   | YES | YES |
| 122 | a | 969.30 | 0.05993   | YES | YES |

|     |   |         |           |     |     |
|-----|---|---------|-----------|-----|-----|
| 123 | a | 970.56  | 0.11995   | YES | YES |
| 124 | a | 972.89  | 1.68605   | YES | YES |
| 125 | a | 975.90  | 0.99378   | YES | YES |
| 126 | a | 981.56  | 15.39186  | YES | YES |
| 127 | a | 1003.30 | 4.35718   | YES | YES |
| 128 | a | 1004.10 | 0.33822   | YES | YES |
| 129 | a | 1017.46 | 9.14523   | YES | YES |
| 130 | a | 1017.60 | 6.28499   | YES | YES |
| 131 | a | 1018.35 | 3.68805   | YES | YES |
| 132 | a | 1022.08 | 6.03322   | YES | YES |
| 133 | a | 1024.73 | 0.29189   | YES | YES |
| 134 | a | 1031.31 | 0.41616   | YES | YES |
| 135 | a | 1033.10 | 1.93439   | YES | YES |
| 136 | a | 1047.24 | 20.12015  | YES | YES |
| 137 | a | 1054.37 | 13.22723  | YES | YES |
| 138 | a | 1073.68 | 1.64409   | YES | YES |
| 139 | a | 1074.47 | 0.89557   | YES | YES |
| 140 | a | 1079.15 | 20.91063  | YES | YES |
| 141 | a | 1083.68 | 8.64109   | YES | YES |
| 142 | a | 1084.30 | 1.93221   | YES | YES |
| 143 | a | 1085.15 | 7.72362   | YES | YES |
| 144 | a | 1086.83 | 44.61521  | YES | YES |
| 145 | a | 1135.13 | 0.92347   | YES | YES |
| 146 | a | 1136.49 | 1.11502   | YES | YES |
| 147 | a | 1137.59 | 2.91262   | YES | YES |
| 148 | a | 1137.76 | 1.11612   | YES | YES |
| 149 | a | 1152.07 | 4.00283   | YES | YES |
| 150 | a | 1156.88 | 6.75479   | YES | YES |
| 151 | a | 1160.39 | 54.38866  | YES | YES |
| 152 | a | 1164.90 | 84.41151  | YES | YES |
| 153 | a | 1235.92 | 46.27920  | YES | YES |
| 154 | a | 1238.06 | 12.42765  | YES | YES |
| 155 | a | 1244.79 | 12.53690  | YES | YES |
| 156 | a | 1245.96 | 52.47181  | YES | YES |
| 157 | a | 1246.87 | 124.91019 | YES | YES |
| 158 | a | 1251.14 | 1.13099   | YES | YES |
| 159 | a | 1252.01 | 71.34959  | YES | YES |
| 160 | a | 1263.22 | 18.07914  | YES | YES |
| 161 | a | 1269.11 | 202.20719 | YES | YES |
| 162 | a | 1274.67 | 221.31108 | YES | YES |
| 163 | a | 1294.85 | 6.26195   | YES | YES |
| 164 | a | 1318.60 | 4.06972   | YES | YES |
| 165 | a | 1351.49 | 0.14564   | YES | YES |
| 166 | a | 1353.88 | 1.69925   | YES | YES |
| 167 | a | 1362.07 | 0.18615   | YES | YES |
| 168 | a | 1365.05 | 10.62186  | YES | YES |
| 169 | a | 1366.57 | 2.45121   | YES | YES |
| 170 | a | 1374.73 | 7.23571   | YES | YES |
| 171 | a | 1378.23 | 0.68107   | YES | YES |
| 172 | a | 1378.32 | 0.86199   | YES | YES |
| 173 | a | 1383.31 | 1.65734   | YES | YES |
| 174 | a | 1383.69 | 0.69854   | YES | YES |
| 175 | a | 1388.92 | 0.17460   | YES | YES |
| 176 | a | 1397.05 | 6.20124   | YES | YES |
| 177 | a | 1405.03 | 1.17549   | YES | YES |

|     |   |         |           |     |     |
|-----|---|---------|-----------|-----|-----|
| 178 | a | 1411.08 | 0.35849   | YES | YES |
| 179 | a | 1421.30 | 8.99550   | YES | YES |
| 180 | a | 1424.51 | 19.70862  | YES | YES |
| 181 | a | 1429.11 | 4.09695   | YES | YES |
| 182 | a | 1429.97 | 6.85258   | YES | YES |
| 183 | a | 1433.50 | 27.12643  | YES | YES |
| 184 | a | 1442.93 | 8.07162   | YES | YES |
| 185 | a | 1447.89 | 28.21657  | YES | YES |
| 186 | a | 1453.32 | 2.02289   | YES | YES |
| 187 | a | 1454.27 | 18.29358  | YES | YES |
| 188 | a | 1455.22 | 10.15585  | YES | YES |
| 189 | a | 1458.43 | 8.60215   | YES | YES |
| 190 | a | 1459.79 | 10.40970  | YES | YES |
| 191 | a | 1460.51 | 45.38971  | YES | YES |
| 192 | a | 1469.68 | 12.70559  | YES | YES |
| 193 | a | 1496.50 | 223.28194 | YES | YES |
| 194 | a | 1499.17 | 25.00068  | YES | YES |
| 195 | a | 1502.37 | 275.10277 | YES | YES |
| 196 | a | 1506.26 | 271.58392 | YES | YES |
| 197 | a | 1556.26 | 0.83719   | YES | YES |
| 198 | a | 1562.69 | 1.26136   | YES | YES |
| 199 | a | 1609.03 | 6.24397   | YES | YES |
| 200 | a | 1609.52 | 2.99181   | YES | YES |
| 201 | a | 1614.09 | 0.81673   | YES | YES |
| 202 | a | 1615.83 | 3.26430   | YES | YES |
| 203 | a | 1631.12 | 11.62204  | YES | YES |
| 204 | a | 1633.59 | 13.67270  | YES | YES |
| 205 | a | 1635.64 | 22.09369  | YES | YES |
| 206 | a | 1636.22 | 12.19961  | YES | YES |
| 207 | a | 2944.57 | 11.84217  | YES | YES |
| 208 | a | 2945.90 | 20.97046  | YES | YES |
| 209 | a | 2947.44 | 3.55437   | YES | YES |
| 210 | a | 2952.72 | 8.85866   | YES | YES |
| 211 | a | 2955.96 | 23.96165  | YES | YES |
| 212 | a | 2966.72 | 8.31689   | YES | YES |
| 213 | a | 3014.82 | 1.93754   | YES | YES |
| 214 | a | 3018.96 | 0.26443   | YES | YES |
| 215 | a | 3021.38 | 23.37231  | YES | YES |
| 216 | a | 3023.02 | 1.18435   | YES | YES |
| 217 | a | 3034.34 | 7.68064   | YES | YES |
| 218 | a | 3038.54 | 3.30211   | YES | YES |
| 219 | a | 3073.79 | 6.94639   | YES | YES |
| 220 | a | 3079.87 | 38.50147  | YES | YES |
| 221 | a | 3081.47 | 3.01954   | YES | YES |
| 222 | a | 3083.86 | 1.43291   | YES | YES |
| 223 | a | 3087.55 | 16.94457  | YES | YES |
| 224 | a | 3092.15 | 14.22459  | YES | YES |
| 225 | a | 3094.24 | 15.67425  | YES | YES |
| 226 | a | 3116.25 | 0.23215   | YES | YES |
| 227 | a | 3119.67 | 0.34882   | YES | YES |
| 228 | a | 3119.94 | 0.81654   | YES | YES |
| 229 | a | 3121.47 | 0.64180   | YES | YES |
| 230 | a | 3128.03 | 1.26933   | YES | YES |
| 231 | a | 3128.79 | 4.63898   | YES | YES |
| 232 | a | 3130.11 | 3.36841   | YES | YES |

|     |   |         |         |     |     |
|-----|---|---------|---------|-----|-----|
| 233 | a | 3132.67 | 2.18949 | YES | YES |
| 234 | a | 3134.22 | 0.26197 | YES | YES |
| 235 | a | 3137.04 | 0.12613 | YES | YES |
| 236 | a | 3137.60 | 0.26638 | YES | YES |
| 237 | a | 3141.01 | 0.16592 | YES | YES |
| 238 | a | 3141.55 | 0.84852 | YES | YES |
| 239 | a | 3142.40 | 0.22700 | YES | YES |
| 240 | a | 3145.79 | 0.77512 | YES | YES |

[H-Ca(HMB)oDFB<sub>4</sub>]<sup>+</sup>

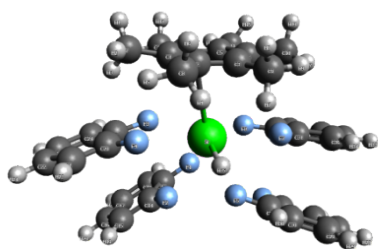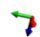

Atomic coordinates

|   |          |          |          |
|---|----------|----------|----------|
| C | 0.08074  | 2.10712  | -2.76151 |
| C | 1.10822  | 1.15950  | -3.03476 |
| C | 0.77524  | -0.21530 | -3.26233 |
| C | -0.57955 | -0.64066 | -3.17328 |
| C | -1.59384 | 0.29622  | -2.80869 |
| C | -1.26597 | 1.66178  | -2.59537 |
| C | 0.36773  | 3.59534  | -2.71631 |
| H | -0.26321 | 4.12975  | -3.45997 |
| H | 1.41924  | 3.83317  | -2.95731 |
| H | 0.14393  | 4.05374  | -1.72830 |
| C | 2.56585  | 1.55525  | -3.14561 |
| H | 3.20192  | 0.86069  | -2.55721 |
| H | 2.76769  | 2.57280  | -2.76457 |
| H | 2.91465  | 1.51578  | -4.20311 |
| C | 1.90126  | -1.15606 | -3.63364 |
| H | 2.63191  | -1.23854 | -2.79728 |
| H | 2.45693  | -0.77718 | -4.51910 |
| H | 1.55242  | -2.17579 | -3.87714 |
| C | -1.01083 | -2.05102 | -3.51513 |
| H | -1.53337 | -2.06728 | -4.49943 |
| H | -1.73124 | -2.46047 | -2.77687 |
| H | -0.16745 | -2.76101 | -3.58301 |
| C | -3.02912 | -0.18282 | -2.73969 |
| H | -3.74576 | 0.62998  | -2.52219 |
| H | -3.16631 | -0.96496 | -1.96038 |
| H | -3.33861 | -0.64246 | -3.70415 |
| C | -2.35973 | 2.65520  | -2.25307 |
| H | -1.95803 | 3.62849  | -1.91590 |
| H | -3.01704 | 2.27665  | -1.44240 |
| H | -3.01118 | 2.85910  | -3.13349 |
| C | -0.95727 | 1.21555  | 3.10679  |

|    |          |          |          |
|----|----------|----------|----------|
| C  | 0.38607  | 1.58975  | 3.22996  |
| C  | 0.79772  | 2.50126  | 4.19959  |
| H  | 1.86050  | 2.77855  | 4.26296  |
| C  | -0.17197 | 3.04559  | 5.05952  |
| H  | 0.13514  | 3.76764  | 5.83147  |
| C  | -1.52228 | 2.67306  | 4.93868  |
| H  | -2.27577 | 3.10061  | 5.61799  |
| C  | -1.92529 | 1.75066  | 3.95579  |
| H  | -2.97536 | 1.44169  | 3.84050  |
| F  | -1.29737 | 0.34885  | 2.11218  |
| F  | 1.28175  | 1.07193  | 2.33755  |
| C  | -0.10588 | 3.53187  | 0.92333  |
| C  | 1.27595  | 3.58415  | 0.71324  |
| C  | 2.03664  | 4.62388  | 1.24499  |
| H  | 3.12320  | 4.64374  | 1.07142  |
| C  | 1.37874  | 5.61764  | 1.99351  |
| H  | 1.96491  | 6.44621  | 2.41995  |
| C  | -0.01132 | 5.56161  | 2.19826  |
| H  | -0.51488 | 6.34381  | 2.78654  |
| C  | -0.77115 | 4.50849  | 1.65864  |
| H  | -1.85744 | 4.42976  | 1.81269  |
| F  | -0.78020 | 2.45441  | 0.40939  |
| F  | 1.84852  | 2.57549  | 0.00120  |
| C  | 1.17168  | -2.85045 | 2.07068  |
| C  | 0.32950  | -3.77297 | 2.70632  |
| C  | 0.73216  | -5.10728 | 2.81355  |
| H  | 0.06514  | -5.82483 | 3.31489  |
| C  | 1.97284  | -5.49285 | 2.27563  |
| H  | 2.29330  | -6.54299 | 2.36065  |
| C  | 2.80238  | -4.55323 | 1.63747  |
| H  | 3.77241  | -4.86364 | 1.21925  |
| C  | 2.40295  | -3.20876 | 1.52962  |
| H  | 2.99761  | -2.43641 | 1.01057  |
| F  | 0.71368  | -1.55852 | 1.94535  |
| F  | -0.85885 | -3.36014 | 3.18090  |
| C  | -0.26458 | -3.48236 | -0.56216 |
| C  | -1.45155 | -2.99018 | -0.01151 |
| C  | -2.44274 | -3.84762 | 0.45588  |
| H  | -3.36094 | -3.43289 | 0.89743  |
| C  | -2.21919 | -5.23327 | 0.35546  |
| H  | -2.98805 | -5.93016 | 0.72265  |
| C  | -1.02813 | -5.72885 | -0.20349 |
| H  | -0.86325 | -6.81486 | -0.27374 |
| C  | -0.03435 | -4.85095 | -0.67141 |
| H  | 0.91342  | -5.20914 | -1.09886 |
| F  | 0.66789  | -2.57317 | -0.96634 |
| F  | -1.59609 | -1.62660 | 0.06700  |
| Sr | 0.56623  | 0.06402  | -0.14805 |
| H  | 2.66709  | -0.43510 | -0.31266 |

### Vibrational analysis

| mode | symmetry | wave number<br>cm**(-1) | IR intensity<br>km/mol | selection rules |       |
|------|----------|-------------------------|------------------------|-----------------|-------|
|      |          |                         |                        | IR              | RAMAN |
| 1    |          | -0.00                   | 0.00000                | -               | -     |

|    |   |        |          |     |     |
|----|---|--------|----------|-----|-----|
| 2  |   | -0.00  | 0.00000  | -   | -   |
| 3  |   | 0.00   | 0.00000  | -   | -   |
| 4  |   | 0.00   | 0.00000  | -   | -   |
| 5  |   | 0.00   | 0.00000  | -   | -   |
| 6  |   | 0.00   | 0.00000  | -   | -   |
| 7  | a | 14.34  | 0.37768  | YES | YES |
| 8  | a | 16.62  | 0.95168  | YES | YES |
| 9  | a | 18.83  | 0.10885  | YES | YES |
| 10 | a | 23.81  | 0.73978  | YES | YES |
| 11 | a | 26.61  | 0.73619  | YES | YES |
| 12 | a | 31.33  | 0.05793  | YES | YES |
| 13 | a | 35.34  | 0.11087  | YES | YES |
| 14 | a | 41.66  | 0.75109  | YES | YES |
| 15 | a | 48.59  | 0.20656  | YES | YES |
| 16 | a | 50.99  | 0.39796  | YES | YES |
| 17 | a | 53.01  | 0.39926  | YES | YES |
| 18 | a | 57.45  | 0.66420  | YES | YES |
| 19 | a | 61.63  | 0.22987  | YES | YES |
| 20 | a | 62.79  | 0.32610  | YES | YES |
| 21 | a | 65.58  | 0.35251  | YES | YES |
| 22 | a | 67.93  | 1.57165  | YES | YES |
| 23 | a | 72.65  | 0.88084  | YES | YES |
| 24 | a | 73.53  | 0.88838  | YES | YES |
| 25 | a | 75.97  | 0.85664  | YES | YES |
| 26 | a | 78.16  | 0.39029  | YES | YES |
| 27 | a | 85.09  | 0.22128  | YES | YES |
| 28 | a | 86.94  | 0.17403  | YES | YES |
| 29 | a | 88.75  | 0.37190  | YES | YES |
| 30 | a | 92.75  | 2.51698  | YES | YES |
| 31 | a | 96.46  | 1.53847  | YES | YES |
| 32 | a | 104.36 | 0.78289  | YES | YES |
| 33 | a | 111.69 | 22.18319 | YES | YES |
| 34 | a | 125.81 | 11.58341 | YES | YES |
| 35 | a | 129.11 | 1.44862  | YES | YES |
| 36 | a | 135.46 | 11.71372 | YES | YES |
| 37 | a | 142.18 | 4.05293  | YES | YES |
| 38 | a | 153.32 | 2.92589  | YES | YES |
| 39 | a | 165.43 | 0.13887  | YES | YES |
| 40 | a | 181.01 | 3.43004  | YES | YES |
| 41 | a | 194.98 | 4.67410  | YES | YES |
| 42 | a | 196.54 | 0.87233  | YES | YES |
| 43 | a | 199.83 | 0.26660  | YES | YES |
| 44 | a | 208.69 | 2.18242  | YES | YES |
| 45 | a | 210.20 | 0.07892  | YES | YES |
| 46 | a | 215.15 | 0.31753  | YES | YES |
| 47 | a | 248.40 | 7.43656  | YES | YES |
| 48 | a | 285.14 | 4.15381  | YES | YES |
| 49 | a | 288.97 | 0.04166  | YES | YES |
| 50 | a | 294.96 | 2.25527  | YES | YES |
| 51 | a | 296.20 | 2.55664  | YES | YES |
| 52 | a | 298.05 | 4.15521  | YES | YES |
| 53 | a | 299.52 | 0.71944  | YES | YES |
| 54 | a | 304.25 | 0.45562  | YES | YES |
| 55 | a | 305.96 | 1.18686  | YES | YES |
| 56 | a | 330.29 | 0.71040  | YES | YES |

|     |   |        |           |     |     |
|-----|---|--------|-----------|-----|-----|
| 57  | a | 341.69 | 0.43543   | YES | YES |
| 58  | a | 364.69 | 5.49054   | YES | YES |
| 59  | a | 370.35 | 6.40178   | YES | YES |
| 60  | a | 394.72 | 0.46483   | YES | YES |
| 61  | a | 405.04 | 1.10118   | YES | YES |
| 62  | a | 427.54 | 105.34114 | YES | YES |
| 63  | a | 432.59 | 32.00468  | YES | YES |
| 64  | a | 433.80 | 13.53938  | YES | YES |
| 65  | a | 434.81 | 2.38807   | YES | YES |
| 66  | a | 436.37 | 24.76124  | YES | YES |
| 67  | a | 440.80 | 120.16064 | YES | YES |
| 68  | a | 443.33 | 5.25197   | YES | YES |
| 69  | a | 443.40 | 12.81678  | YES | YES |
| 70  | a | 444.98 | 36.53771  | YES | YES |
| 71  | a | 445.63 | 7.31658   | YES | YES |
| 72  | a | 448.36 | 1.33998   | YES | YES |
| 73  | a | 454.21 | 252.43451 | YES | YES |
| 74  | a | 462.73 | 189.94567 | YES | YES |
| 75  | a | 536.13 | 0.51454   | YES | YES |
| 76  | a | 536.52 | 1.71146   | YES | YES |
| 77  | a | 537.02 | 5.07773   | YES | YES |
| 78  | a | 538.86 | 2.59189   | YES | YES |
| 79  | a | 542.76 | 1.94051   | YES | YES |
| 80  | a | 543.59 | 1.86014   | YES | YES |
| 81  | a | 543.88 | 0.67630   | YES | YES |
| 82  | a | 545.88 | 0.67471   | YES | YES |
| 83  | a | 552.27 | 0.74882   | YES | YES |
| 84  | a | 558.82 | 4.94465   | YES | YES |
| 85  | a | 559.01 | 14.95585  | YES | YES |
| 86  | a | 560.15 | 18.12137  | YES | YES |
| 87  | a | 561.54 | 5.72266   | YES | YES |
| 88  | a | 562.06 | 0.40191   | YES | YES |
| 89  | a | 571.99 | 0.69382   | YES | YES |
| 90  | a | 574.09 | 0.31058   | YES | YES |
| 91  | a | 584.13 | 0.27074   | YES | YES |
| 92  | a | 672.13 | 0.05011   | YES | YES |
| 93  | a | 675.36 | 0.34168   | YES | YES |
| 94  | a | 675.87 | 0.43071   | YES | YES |
| 95  | a | 679.50 | 0.10081   | YES | YES |
| 96  | a | 705.21 | 0.29934   | YES | YES |
| 97  | a | 744.63 | 48.44842  | YES | YES |
| 98  | a | 745.55 | 182.72903 | YES | YES |
| 99  | a | 748.97 | 3.68546   | YES | YES |
| 100 | a | 754.12 | 22.08038  | YES | YES |
| 101 | a | 754.70 | 34.54512  | YES | YES |
| 102 | a | 756.36 | 60.64651  | YES | YES |
| 103 | a | 757.27 | 127.59635 | YES | YES |
| 104 | a | 760.20 | 36.74848  | YES | YES |
| 105 | a | 792.97 | 1.30720   | YES | YES |
| 106 | a | 796.10 | 3.59674   | YES | YES |
| 107 | a | 821.43 | 6.76843   | YES | YES |
| 108 | a | 822.55 | 1.15698   | YES | YES |
| 109 | a | 825.29 | 13.59709  | YES | YES |
| 110 | a | 830.34 | 17.44602  | YES | YES |
| 111 | a | 835.01 | 0.98751   | YES | YES |



|     |   |         |           |     |     |
|-----|---|---------|-----------|-----|-----|
| 112 | a | 835.80  | 0.54423   | YES | YES |
| 113 | a | 838.58  | 0.34707   | YES | YES |
| 114 | a | 851.14  | 1.65182   | YES | YES |
| 115 | a | 924.34  | 2.75346   | YES | YES |
| 116 | a | 925.55  | 7.82717   | YES | YES |
| 117 | a | 926.60  | 0.46746   | YES | YES |
| 118 | a | 937.85  | 9.13103   | YES | YES |
| 119 | a | 950.35  | 4.33503   | YES | YES |
| 120 | a | 961.22  | 1.64271   | YES | YES |
| 121 | a | 969.77  | 0.70321   | YES | YES |
| 122 | a | 970.58  | 0.05401   | YES | YES |
| 123 | a | 971.32  | 0.74239   | YES | YES |
| 124 | a | 972.01  | 0.02449   | YES | YES |
| 125 | a | 972.44  | 1.58662   | YES | YES |
| 126 | a | 981.02  | 13.10526  | YES | YES |
| 127 | a | 1002.08 | 0.97455   | YES | YES |
| 128 | a | 1005.62 | 3.05374   | YES | YES |
| 129 | a | 1018.73 | 2.43873   | YES | YES |
| 130 | a | 1018.74 | 3.60929   | YES | YES |
| 131 | a | 1020.64 | 4.52464   | YES | YES |
| 132 | a | 1021.93 | 9.25471   | YES | YES |
| 133 | a | 1027.22 | 1.43426   | YES | YES |
| 134 | a | 1029.98 | 0.30088   | YES | YES |
| 135 | a | 1033.18 | 1.12724   | YES | YES |
| 136 | a | 1047.21 | 10.52073  | YES | YES |
| 137 | a | 1051.43 | 16.52677  | YES | YES |
| 138 | a | 1072.07 | 3.04820   | YES | YES |
| 139 | a | 1074.06 | 0.43520   | YES | YES |
| 140 | a | 1081.00 | 0.49312   | YES | YES |
| 141 | a | 1083.80 | 18.30209  | YES | YES |
| 142 | a | 1084.03 | 12.05362  | YES | YES |
| 143 | a | 1084.61 | 2.85575   | YES | YES |
| 144 | a | 1086.93 | 27.69250  | YES | YES |
| 145 | a | 1135.91 | 3.55051   | YES | YES |
| 146 | a | 1137.53 | 6.64557   | YES | YES |
| 147 | a | 1137.74 | 2.81758   | YES | YES |
| 148 | a | 1137.80 | 0.72071   | YES | YES |
| 149 | a | 1144.26 | 206.60702 | YES | YES |
| 150 | a | 1151.86 | 41.47952  | YES | YES |
| 151 | a | 1153.93 | 11.14102  | YES | YES |
| 152 | a | 1166.66 | 47.57960  | YES | YES |
| 153 | a | 1169.26 | 155.99318 | YES | YES |
| 154 | a | 1241.81 | 9.88663   | YES | YES |
| 155 | a | 1243.95 | 80.88230  | YES | YES |
| 156 | a | 1246.15 | 37.19834  | YES | YES |
| 157 | a | 1246.71 | 1.06935   | YES | YES |
| 158 | a | 1248.72 | 33.41511  | YES | YES |
| 159 | a | 1249.05 | 15.51116  | YES | YES |
| 160 | a | 1249.31 | 43.04388  | YES | YES |
| 161 | a | 1258.42 | 171.24052 | YES | YES |
| 162 | a | 1269.85 | 53.81454  | YES | YES |
| 163 | a | 1289.89 | 0.31442   | YES | YES |
| 164 | a | 1321.64 | 1.79092   | YES | YES |
| 165 | a | 1353.73 | 0.06627   | YES | YES |
| 166 | a | 1355.89 | 1.48413   | YES | YES |

|     |   |         |           |     |     |
|-----|---|---------|-----------|-----|-----|
| 167 | a | 1361.59 | 4.28046   | YES | YES |
| 168 | a | 1365.29 | 7.19196   | YES | YES |
| 169 | a | 1366.21 | 3.06268   | YES | YES |
| 170 | a | 1375.43 | 10.88837  | YES | YES |
| 171 | a | 1378.26 | 0.84268   | YES | YES |
| 172 | a | 1380.26 | 0.26732   | YES | YES |
| 173 | a | 1381.86 | 0.35328   | YES | YES |
| 174 | a | 1383.31 | 0.94572   | YES | YES |
| 175 | a | 1392.59 | 1.20241   | YES | YES |
| 176 | a | 1395.05 | 1.07189   | YES | YES |
| 177 | a | 1411.40 | 15.45987  | YES | YES |
| 178 | a | 1414.09 | 4.87069   | YES | YES |
| 179 | a | 1417.55 | 1.48232   | YES | YES |
| 180 | a | 1419.99 | 9.92839   | YES | YES |
| 181 | a | 1424.58 | 3.75103   | YES | YES |
| 182 | a | 1432.45 | 10.31647  | YES | YES |
| 183 | a | 1439.95 | 14.82512  | YES | YES |
| 184 | a | 1441.83 | 27.17182  | YES | YES |
| 185 | a | 1450.03 | 3.18370   | YES | YES |
| 186 | a | 1451.19 | 13.40445  | YES | YES |
| 187 | a | 1454.82 | 16.31981  | YES | YES |
| 188 | a | 1457.81 | 4.21883   | YES | YES |
| 189 | a | 1458.41 | 12.04297  | YES | YES |
| 190 | a | 1459.35 | 6.62560   | YES | YES |
| 191 | a | 1460.13 | 31.22259  | YES | YES |
| 192 | a | 1470.02 | 12.37508  | YES | YES |
| 193 | a | 1494.42 | 66.45255  | YES | YES |
| 194 | a | 1494.83 | 183.82125 | YES | YES |
| 195 | a | 1500.15 | 364.41302 | YES | YES |
| 196 | a | 1505.65 | 118.32572 | YES | YES |
| 197 | a | 1559.46 | 2.00631   | YES | YES |
| 198 | a | 1563.56 | 1.82357   | YES | YES |
| 199 | a | 1609.34 | 6.43133   | YES | YES |
| 200 | a | 1612.23 | 0.56728   | YES | YES |
| 201 | a | 1613.55 | 0.78111   | YES | YES |
| 202 | a | 1615.93 | 0.41438   | YES | YES |
| 203 | a | 1629.41 | 13.39250  | YES | YES |
| 204 | a | 1631.00 | 9.75398   | YES | YES |
| 205 | a | 1632.33 | 14.73438  | YES | YES |
| 206 | a | 1634.19 | 9.81639   | YES | YES |
| 207 | a | 2942.64 | 20.81536  | YES | YES |
| 208 | a | 2944.80 | 4.32910   | YES | YES |
| 209 | a | 2947.66 | 16.93803  | YES | YES |
| 210 | a | 2950.50 | 9.99729   | YES | YES |
| 211 | a | 2952.08 | 9.88587   | YES | YES |
| 212 | a | 2956.43 | 13.07708  | YES | YES |
| 213 | a | 3012.64 | 2.48421   | YES | YES |
| 214 | a | 3014.08 | 13.38108  | YES | YES |
| 215 | a | 3018.72 | 9.72880   | YES | YES |
| 216 | a | 3021.69 | 6.09592   | YES | YES |
| 217 | a | 3023.76 | 0.57085   | YES | YES |
| 218 | a | 3025.24 | 5.30246   | YES | YES |
| 219 | a | 3078.79 | 41.10302  | YES | YES |
| 220 | a | 3080.52 | 6.46243   | YES | YES |
| 221 | a | 3083.44 | 13.73465  | YES | YES |

|     |   |         |          |     |     |
|-----|---|---------|----------|-----|-----|
| 222 | a | 3085.27 | 3.39578  | YES | YES |
| 223 | a | 3089.49 | 5.91964  | YES | YES |
| 224 | a | 3093.77 | 9.78842  | YES | YES |
| 225 | a | 3094.58 | 17.69971 | YES | YES |
| 226 | a | 3115.19 | 0.32260  | YES | YES |
| 227 | a | 3119.57 | 0.89080  | YES | YES |
| 228 | a | 3120.78 | 0.90444  | YES | YES |
| 229 | a | 3121.34 | 0.77182  | YES | YES |
| 230 | a | 3128.35 | 4.62040  | YES | YES |
| 231 | a | 3129.81 | 2.14405  | YES | YES |
| 232 | a | 3131.26 | 2.81584  | YES | YES |
| 233 | a | 3132.57 | 2.37805  | YES | YES |
| 234 | a | 3136.41 | 0.72464  | YES | YES |
| 235 | a | 3136.60 | 0.17057  | YES | YES |
| 236 | a | 3138.22 | 1.43456  | YES | YES |
| 237 | a | 3141.35 | 1.11195  | YES | YES |
| 238 | a | 3142.16 | 0.44942  | YES | YES |
| 239 | a | 3142.94 | 0.24939  | YES | YES |
| 240 | a | 3145.89 | 1.04597  | YES | YES |

[H-Ba(HMB)oDFB<sub>4</sub>]<sup>+</sup>

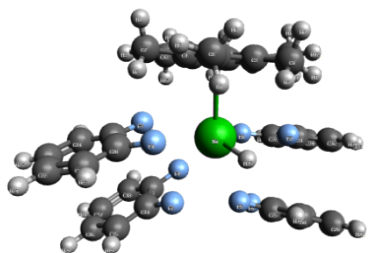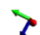

Atomic coordinates

|   |          |          |          |
|---|----------|----------|----------|
| C | 0.62393  | 2.54012  | -2.32691 |
| C | 1.53050  | 1.53551  | -2.77540 |
| C | 1.03847  | 0.29032  | -3.27662 |
| C | -0.36504 | 0.06528  | -3.36715 |
| C | -1.26775 | 1.05363  | -2.87679 |
| C | -0.78052 | 2.30051  | -2.39623 |
| C | 1.13646  | 3.86773  | -1.80213 |
| H | 1.17064  | 4.63487  | -2.60984 |
| H | 2.15699  | 3.78637  | -1.38513 |
| H | 0.49079  | 4.27463  | -0.99880 |
| C | 3.02940  | 1.75119  | -2.76412 |
| H | 3.51356  | 1.11633  | -1.98653 |
| H | 3.31278  | 2.80232  | -2.57321 |
| H | 3.47541  | 1.46721  | -3.74100 |
| C | 2.05128  | -0.74792 | -3.70979 |
| H | 2.84135  | -0.86293 | -2.93807 |
| H | 2.55108  | -0.45436 | -4.66159 |
| H | 1.60331  | -1.74662 | -3.86261 |
| C | -0.94049 | -1.16784 | -4.03427 |
| H | -1.62907 | -0.87260 | -4.85604 |
| H | -1.53740 | -1.79835 | -3.33896 |

|   |          |          |          |
|---|----------|----------|----------|
| H | -0.16312 | -1.81476 | -4.47913 |
| C | -2.76170 | 0.80717  | -2.91955 |
| H | -3.21899 | 1.24334  | -3.83872 |
| H | -3.28077 | 1.26804  | -2.05403 |
| H | -3.01133 | -0.27154 | -2.91715 |
| C | -1.78480 | 3.37152  | -2.01847 |
| H | -1.32186 | 4.37019  | -1.91370 |
| H | -2.30219 | 3.14422  | -1.05870 |
| H | -2.57479 | 3.46092  | -2.79419 |
| C | -1.25296 | 0.90934  | 3.36657  |
| C | 0.11341  | 0.99661  | 3.66154  |
| C | 0.56273  | 1.65333  | 4.80556  |
| H | 1.64312  | 1.70739  | 5.00572  |
| C | -0.38798 | 2.23457  | 5.66212  |
| H | -0.04885 | 2.75699  | 6.56967  |
| C | -1.75991 | 2.15017  | 5.36725  |
| H | -2.49953 | 2.60381  | 6.04484  |
| C | -2.20289 | 1.48282  | 4.21083  |
| H | -3.27083 | 1.39867  | 3.95809  |
| F | -1.62720 | 0.27896  | 2.21673  |
| F | 0.99901  | 0.45530  | 2.77721  |
| C | 0.15444  | 3.45640  | 1.75818  |
| C | 1.53870  | 3.26180  | 1.69151  |
| C | 2.39793  | 3.97195  | 2.52845  |
| H | 3.48266  | 3.79904  | 2.45983  |
| C | 1.84083  | 4.88796  | 3.43939  |
| H | 2.50674  | 5.45670  | 4.10652  |
| C | 0.44955  | 5.08070  | 3.50226  |
| H | 0.02288  | 5.79792  | 4.21992  |
| C | -0.40989 | 4.36087  | 2.65387  |
| H | -1.50264 | 4.48263  | 2.68654  |
| F | -0.63506 | 2.69713  | 0.93620  |
| F | 2.01528  | 2.33974  | 0.81135  |
| C | 0.57761  | -3.35882 | 1.55196  |
| C | -0.34559 | -4.37035 | 1.85270  |
| C | 0.00561  | -5.70607 | 1.63654  |
| H | -0.72480 | -6.49270 | 1.87895  |
| C | 1.27582  | -6.00409 | 1.11230  |
| H | 1.55521  | -7.05584 | 0.94326  |
| C | 2.18419  | -4.97567 | 0.80474  |
| H | 3.17562  | -5.21596 | 0.39045  |
| C | 1.83733  | -3.63022 | 1.02495  |
| H | 2.50075  | -2.78411 | 0.76459  |
| F | 0.17873  | -2.05611 | 1.74559  |
| F | -1.55849 | -4.03444 | 2.32489  |
| C | -0.59737 | -3.40809 | -1.34669 |
| C | -1.81684 | -3.00628 | -0.78971 |
| C | -2.85634 | -3.91248 | -0.59978 |
| H | -3.79922 | -3.57201 | -0.14678 |
| C | -2.65207 | -5.24894 | -0.98896 |
| H | -3.46098 | -5.98133 | -0.84414 |
| C | -1.43012 | -5.65112 | -1.55559 |
| H | -1.28006 | -6.69977 | -1.85462 |
| C | -0.38662 | -4.72720 | -1.74001 |
| H | 0.58525  | -5.01465 | -2.16677 |

|    |          |          |          |
|----|----------|----------|----------|
| F  | 0.38347  | -2.47108 | -1.47712 |
| F  | -1.94942 | -1.69185 | -0.42121 |
| Ba | 0.33820  | 0.08223  | -0.08214 |
| H  | 2.54449  | -0.64834 | -0.18270 |

### Vibrational analysis

| mode | symmetry | wave number<br>cm**(-1) | IR intensity<br>km/mol | selection rules |       |
|------|----------|-------------------------|------------------------|-----------------|-------|
|      |          |                         |                        | IR              | RAMAN |
| 1    |          | -0.00                   | 0.00000                | -               | -     |
| 2    |          | -0.00                   | 0.00000                | -               | -     |
| 3    |          | 0.00                    | 0.00000                | -               | -     |
| 4    |          | 0.00                    | 0.00000                | -               | -     |
| 5    |          | 0.00                    | 0.00000                | -               | -     |
| 6    |          | 0.00                    | 0.00000                | -               | -     |
| 7    | a        | 11.95                   | 0.39342                | YES             | YES   |
| 8    | a        | 12.83                   | 0.72125                | YES             | YES   |
| 9    | a        | 18.42                   | 1.16956                | YES             | YES   |
| 10   | a        | 19.63                   | 0.01898                | YES             | YES   |
| 11   | a        | 22.78                   | 0.63724                | YES             | YES   |
| 12   | a        | 26.37                   | 0.25849                | YES             | YES   |
| 13   | a        | 31.61                   | 0.78285                | YES             | YES   |
| 14   | a        | 41.05                   | 1.52087                | YES             | YES   |
| 15   | a        | 42.89                   | 0.48623                | YES             | YES   |
| 16   | a        | 47.45                   | 0.80772                | YES             | YES   |
| 17   | a        | 52.58                   | 0.68007                | YES             | YES   |
| 18   | a        | 53.12                   | 0.29301                | YES             | YES   |
| 19   | a        | 56.17                   | 0.37195                | YES             | YES   |
| 20   | a        | 58.86                   | 0.29837                | YES             | YES   |
| 21   | a        | 62.43                   | 0.14690                | YES             | YES   |
| 22   | a        | 65.40                   | 0.76657                | YES             | YES   |
| 23   | a        | 67.86                   | 0.07688                | YES             | YES   |
| 24   | a        | 71.82                   | 0.70366                | YES             | YES   |
| 25   | a        | 73.60                   | 0.66229                | YES             | YES   |
| 26   | a        | 76.07                   | 0.29787                | YES             | YES   |
| 27   | a        | 78.05                   | 0.54694                | YES             | YES   |
| 28   | a        | 79.49                   | 0.05840                | YES             | YES   |
| 29   | a        | 83.09                   | 0.37189                | YES             | YES   |
| 30   | a        | 86.30                   | 2.03097                | YES             | YES   |
| 31   | a        | 93.36                   | 1.17480                | YES             | YES   |
| 32   | a        | 95.73                   | 6.52615                | YES             | YES   |
| 33   | a        | 102.78                  | 3.55498                | YES             | YES   |
| 34   | a        | 108.10                  | 0.51213                | YES             | YES   |
| 35   | a        | 112.72                  | 4.33523                | YES             | YES   |
| 36   | a        | 119.29                  | 4.42126                | YES             | YES   |
| 37   | a        | 124.21                  | 9.01844                | YES             | YES   |
| 38   | a        | 133.06                  | 0.52041                | YES             | YES   |
| 39   | a        | 145.72                  | 1.21177                | YES             | YES   |
| 40   | a        | 163.05                  | 3.31483                | YES             | YES   |
| 41   | a        | 170.01                  | 0.23479                | YES             | YES   |
| 42   | a        | 193.75                  | 0.40722                | YES             | YES   |
| 43   | a        | 196.54                  | 0.13013                | YES             | YES   |
| 44   | a        | 203.78                  | 0.81146                | YES             | YES   |
| 45   | a        | 204.83                  | 0.43189                | YES             | YES   |
| 46   | a        | 216.65                  | 3.83321                | YES             | YES   |

|     |   |        |           |     |     |
|-----|---|--------|-----------|-----|-----|
| 47  | a | 229.92 | 8.20217   | YES | YES |
| 48  | a | 283.85 | 2.10411   | YES | YES |
| 49  | a | 285.82 | 0.01480   | YES | YES |
| 50  | a | 289.98 | 1.36833   | YES | YES |
| 51  | a | 292.99 | 2.43867   | YES | YES |
| 52  | a | 293.44 | 2.19686   | YES | YES |
| 53  | a | 295.57 | 1.08531   | YES | YES |
| 54  | a | 300.61 | 0.03870   | YES | YES |
| 55  | a | 302.90 | 0.56176   | YES | YES |
| 56  | a | 328.55 | 0.40794   | YES | YES |
| 57  | a | 348.29 | 1.67304   | YES | YES |
| 58  | a | 357.91 | 12.73093  | YES | YES |
| 59  | a | 369.17 | 0.31372   | YES | YES |
| 60  | a | 385.50 | 270.66134 | YES | YES |
| 61  | a | 391.31 | 1.71602   | YES | YES |
| 62  | a | 409.31 | 8.24718   | YES | YES |
| 63  | a | 417.15 | 406.38491 | YES | YES |
| 64  | a | 433.83 | 5.79363   | YES | YES |
| 65  | a | 433.98 | 1.31848   | YES | YES |
| 66  | a | 434.27 | 1.17193   | YES | YES |
| 67  | a | 435.83 | 9.20069   | YES | YES |
| 68  | a | 440.69 | 2.56194   | YES | YES |
| 69  | a | 443.16 | 5.90846   | YES | YES |
| 70  | a | 445.28 | 0.75078   | YES | YES |
| 71  | a | 446.82 | 4.36554   | YES | YES |
| 72  | a | 447.44 | 0.88515   | YES | YES |
| 73  | a | 448.59 | 0.05439   | YES | YES |
| 74  | a | 457.88 | 8.93733   | YES | YES |
| 75  | a | 535.50 | 0.13768   | YES | YES |
| 76  | a | 535.91 | 1.42051   | YES | YES |
| 77  | a | 536.56 | 5.03518   | YES | YES |
| 78  | a | 537.97 | 5.34927   | YES | YES |
| 79  | a | 541.07 | 1.37460   | YES | YES |
| 80  | a | 542.58 | 0.08634   | YES | YES |
| 81  | a | 542.95 | 1.07960   | YES | YES |
| 82  | a | 546.14 | 0.13559   | YES | YES |
| 83  | a | 549.61 | 1.01190   | YES | YES |
| 84  | a | 559.53 | 2.06137   | YES | YES |
| 85  | a | 559.75 | 24.53678  | YES | YES |
| 86  | a | 560.24 | 10.16897  | YES | YES |
| 87  | a | 561.12 | 10.01675  | YES | YES |
| 88  | a | 563.87 | 0.83322   | YES | YES |
| 89  | a | 567.22 | 0.27253   | YES | YES |
| 90  | a | 571.93 | 0.59313   | YES | YES |
| 91  | a | 582.44 | 0.68273   | YES | YES |
| 92  | a | 671.69 | 0.05809   | YES | YES |
| 93  | a | 673.97 | 0.44926   | YES | YES |
| 94  | a | 675.26 | 0.37492   | YES | YES |
| 95  | a | 679.63 | 0.08183   | YES | YES |
| 96  | a | 698.35 | 0.21704   | YES | YES |
| 97  | a | 744.49 | 78.34997  | YES | YES |
| 98  | a | 745.51 | 152.41510 | YES | YES |
| 99  | a | 749.09 | 0.80638   | YES | YES |
| 100 | a | 754.07 | 25.53644  | YES | YES |
| 101 | a | 754.89 | 13.66529  | YES | YES |

|     |   |         |           |     |     |
|-----|---|---------|-----------|-----|-----|
| 102 | a | 756.56  | 146.34699 | YES | YES |
| 103 | a | 757.07  | 37.95820  | YES | YES |
| 104 | a | 759.28  | 60.42639  | YES | YES |
| 105 | a | 791.85  | 0.70189   | YES | YES |
| 106 | a | 799.98  | 4.01145   | YES | YES |
| 107 | a | 822.82  | 6.15649   | YES | YES |
| 108 | a | 823.37  | 0.35140   | YES | YES |
| 109 | a | 825.70  | 11.92253  | YES | YES |
| 110 | a | 830.18  | 19.25313  | YES | YES |
| 111 | a | 834.51  | 1.27414   | YES | YES |
| 112 | a | 835.61  | 0.48373   | YES | YES |
| 113 | a | 838.40  | 0.50270   | YES | YES |
| 114 | a | 852.22  | 2.63162   | YES | YES |
| 115 | a | 923.63  | 2.67883   | YES | YES |
| 116 | a | 925.04  | 6.75691   | YES | YES |
| 117 | a | 926.25  | 0.75527   | YES | YES |
| 118 | a | 938.90  | 12.58074  | YES | YES |
| 119 | a | 952.33  | 0.97683   | YES | YES |
| 120 | a | 962.62  | 0.45387   | YES | YES |
| 121 | a | 969.36  | 0.05660   | YES | YES |
| 122 | a | 970.31  | 0.37850   | YES | YES |
| 123 | a | 971.02  | 0.03917   | YES | YES |
| 124 | a | 972.16  | 0.90196   | YES | YES |
| 125 | a | 972.88  | 5.55396   | YES | YES |
| 126 | a | 979.80  | 12.36561  | YES | YES |
| 127 | a | 1002.66 | 4.01559   | YES | YES |
| 128 | a | 1003.70 | 2.30069   | YES | YES |
| 129 | a | 1019.39 | 4.26949   | YES | YES |
| 130 | a | 1019.51 | 1.17607   | YES | YES |
| 131 | a | 1020.88 | 4.90354   | YES | YES |
| 132 | a | 1025.31 | 9.42928   | YES | YES |
| 133 | a | 1026.99 | 2.40934   | YES | YES |
| 134 | a | 1030.90 | 1.59748   | YES | YES |
| 135 | a | 1032.69 | 0.74463   | YES | YES |
| 136 | a | 1048.75 | 4.31196   | YES | YES |
| 137 | a | 1052.24 | 17.63425  | YES | YES |
| 138 | a | 1059.47 | 398.01241 | YES | YES |
| 139 | a | 1073.37 | 2.09727   | YES | YES |
| 140 | a | 1074.04 | 1.83090   | YES | YES |
| 141 | a | 1081.26 | 2.72689   | YES | YES |
| 142 | a | 1084.80 | 21.94991  | YES | YES |
| 143 | a | 1085.20 | 0.39229   | YES | YES |
| 144 | a | 1087.34 | 40.45248  | YES | YES |
| 145 | a | 1088.08 | 35.58358  | YES | YES |
| 146 | a | 1137.00 | 4.43325   | YES | YES |
| 147 | a | 1137.20 | 2.17933   | YES | YES |
| 148 | a | 1137.50 | 0.49588   | YES | YES |
| 149 | a | 1137.60 | 0.71842   | YES | YES |
| 150 | a | 1155.04 | 5.55969   | YES | YES |
| 151 | a | 1156.95 | 0.15381   | YES | YES |
| 152 | a | 1167.92 | 31.08018  | YES | YES |
| 153 | a | 1169.00 | 72.70208  | YES | YES |
| 154 | a | 1243.42 | 11.68888  | YES | YES |
| 155 | a | 1244.80 | 55.29388  | YES | YES |
| 156 | a | 1246.48 | 1.54769   | YES | YES |

|     |   |         |           |     |     |
|-----|---|---------|-----------|-----|-----|
| 157 | a | 1247.98 | 3.37576   | YES | YES |
| 158 | a | 1248.61 | 5.64936   | YES | YES |
| 159 | a | 1250.14 | 114.75435 | YES | YES |
| 160 | a | 1250.29 | 30.68106  | YES | YES |
| 161 | a | 1259.04 | 201.60039 | YES | YES |
| 162 | a | 1270.47 | 50.11626  | YES | YES |
| 163 | a | 1299.06 | 1.40886   | YES | YES |
| 164 | a | 1318.14 | 1.47096   | YES | YES |
| 165 | a | 1352.73 | 0.17507   | YES | YES |
| 166 | a | 1357.03 | 3.23897   | YES | YES |
| 167 | a | 1363.40 | 0.91345   | YES | YES |
| 168 | a | 1364.85 | 13.18665  | YES | YES |
| 169 | a | 1366.83 | 6.15318   | YES | YES |
| 170 | a | 1373.62 | 6.11340   | YES | YES |
| 171 | a | 1377.99 | 0.81997   | YES | YES |
| 172 | a | 1380.03 | 0.17785   | YES | YES |
| 173 | a | 1381.36 | 0.27556   | YES | YES |
| 174 | a | 1382.47 | 0.42226   | YES | YES |
| 175 | a | 1389.13 | 0.49954   | YES | YES |
| 176 | a | 1395.44 | 3.32436   | YES | YES |
| 177 | a | 1405.57 | 1.22536   | YES | YES |
| 178 | a | 1413.50 | 2.83384   | YES | YES |
| 179 | a | 1415.56 | 1.83027   | YES | YES |
| 180 | a | 1421.93 | 38.97760  | YES | YES |
| 181 | a | 1426.17 | 7.17478   | YES | YES |
| 182 | a | 1432.61 | 10.38363  | YES | YES |
| 183 | a | 1440.62 | 21.36082  | YES | YES |
| 184 | a | 1444.86 | 15.75310  | YES | YES |
| 185 | a | 1450.13 | 27.46455  | YES | YES |
| 186 | a | 1454.16 | 16.00188  | YES | YES |
| 187 | a | 1455.07 | 10.79208  | YES | YES |
| 188 | a | 1457.67 | 4.54119   | YES | YES |
| 189 | a | 1458.37 | 6.09742   | YES | YES |
| 190 | a | 1459.03 | 8.75881   | YES | YES |
| 191 | a | 1463.23 | 24.53449  | YES | YES |
| 192 | a | 1472.63 | 7.88210   | YES | YES |
| 193 | a | 1495.66 | 136.70540 | YES | YES |
| 194 | a | 1495.99 | 118.64949 | YES | YES |
| 195 | a | 1501.35 | 397.02716 | YES | YES |
| 196 | a | 1506.64 | 111.27442 | YES | YES |
| 197 | a | 1558.18 | 0.29093   | YES | YES |
| 198 | a | 1562.51 | 1.08804   | YES | YES |
| 199 | a | 1609.62 | 6.85498   | YES | YES |
| 200 | a | 1613.34 | 0.44936   | YES | YES |
| 201 | a | 1614.50 | 0.27664   | YES | YES |
| 202 | a | 1616.61 | 0.33410   | YES | YES |
| 203 | a | 1628.29 | 12.56328  | YES | YES |
| 204 | a | 1629.82 | 10.04051  | YES | YES |
| 205 | a | 1630.60 | 21.50035  | YES | YES |
| 206 | a | 1631.23 | 7.92219   | YES | YES |
| 207 | a | 2940.79 | 11.91724  | YES | YES |
| 208 | a | 2942.10 | 15.99150  | YES | YES |
| 209 | a | 2945.05 | 5.16163   | YES | YES |
| 210 | a | 2949.74 | 10.19130  | YES | YES |
| 211 | a | 2952.10 | 10.19039  | YES | YES |



|     |   |         |          |     |     |
|-----|---|---------|----------|-----|-----|
| 212 | a | 2954.61 | 11.80079 | YES | YES |
| 213 | a | 3016.75 | 10.79922 | YES | YES |
| 214 | a | 3018.58 | 5.85180  | YES | YES |
| 215 | a | 3019.99 | 8.75166  | YES | YES |
| 216 | a | 3026.06 | 0.71998  | YES | YES |
| 217 | a | 3027.48 | 2.63840  | YES | YES |
| 218 | a | 3040.11 | 11.84276 | YES | YES |
| 219 | a | 3048.75 | 73.31159 | YES | YES |
| 220 | a | 3068.53 | 8.50811  | YES | YES |
| 221 | a | 3078.94 | 1.15959  | YES | YES |
| 222 | a | 3082.89 | 6.77014  | YES | YES |
| 223 | a | 3085.07 | 12.90257 | YES | YES |
| 224 | a | 3091.49 | 7.47532  | YES | YES |
| 225 | a | 3092.80 | 12.53287 | YES | YES |
| 226 | a | 3114.21 | 0.48549  | YES | YES |
| 227 | a | 3119.23 | 0.94513  | YES | YES |
| 228 | a | 3120.18 | 0.93826  | YES | YES |
| 229 | a | 3120.69 | 0.79285  | YES | YES |
| 230 | a | 3127.64 | 4.91011  | YES | YES |
| 231 | a | 3129.54 | 1.86345  | YES | YES |
| 232 | a | 3130.71 | 3.18157  | YES | YES |
| 233 | a | 3132.09 | 2.55687  | YES | YES |
| 234 | a | 3136.37 | 0.65567  | YES | YES |
| 235 | a | 3136.50 | 0.14038  | YES | YES |
| 236 | a | 3137.64 | 1.23681  | YES | YES |
| 237 | a | 3141.16 | 1.04230  | YES | YES |
| 238 | a | 3142.38 | 0.49004  | YES | YES |
| 239 | a | 3142.58 | 0.17178  | YES | YES |
| 240 | a | 3145.60 | 0.90965  | YES | YES |

TMS<sup>+</sup>

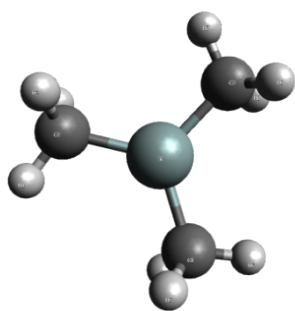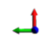

Atomic coordinates

|    |          |          |          |
|----|----------|----------|----------|
| C  | -1.77202 | -0.51312 | -0.00109 |
| Si | -0.00000 | 0.00000  | -0.00303 |
| C  | 0.44164  | 1.79117  | -0.00109 |
| H  | -0.44385 | 2.46070  | -0.01115 |
| H  | 1.08733  | 2.02055  | -0.88338 |
| H  | 1.06582  | 2.02144  | 0.89663  |
| H  | -2.29352 | -0.06862 | -0.88338 |
| H  | -2.28353 | -0.08769 | 0.89663  |
| H  | -1.90910 | -1.61473 | -0.01115 |
| C  | 1.33038  | -1.27806 | -0.00109 |
| H  | 2.35295  | -0.84597 | -0.01115 |

|   |         |          |          |
|---|---------|----------|----------|
| H | 1.20618 | -1.95193 | -0.88338 |
| H | 1.21771 | -1.93375 | 0.89663  |

Vibrational analysis

| mode | symmetry | wave number<br>cm <sup>**</sup> (-1) | IR intensity<br>km/mol | selection rules |       |
|------|----------|--------------------------------------|------------------------|-----------------|-------|
|      |          |                                      |                        | IR              | RAMAN |
| 1    |          | -0.00                                | 0.00000                | -               | -     |
| 2    |          | -0.00                                | 0.00000                | -               | -     |
| 3    |          | 0.00                                 | 0.00000                | -               | -     |
| 4    |          | 0.00                                 | 0.00000                | -               | -     |
| 5    |          | 0.00                                 | 0.00000                | -               | -     |
| 6    |          | 0.00                                 | 0.00000                | -               | -     |
| 7    | e        | 41.97                                | 0.00121                | YES             | YES   |
| 8    | e        | 41.97                                | 0.00121                | YES             | YES   |
| 9    | a        | 71.31                                | 2.66890                | YES             | YES   |
| 10   | e        | 210.22                               | 2.17958                | YES             | YES   |
| 11   | e        | 210.22                               | 2.17958                | YES             | YES   |
| 12   | a        | 214.38                               | 1.30854                | YES             | YES   |
| 13   | a        | 594.49                               | 0.00127                | YES             | YES   |
| 14   | e        | 621.71                               | 0.00091                | YES             | YES   |
| 15   | e        | 621.71                               | 0.00091                | YES             | YES   |
| 16   | a        | 696.30                               | 0.00028                | YES             | YES   |
| 17   | e        | 744.25                               | 7.79635                | YES             | YES   |
| 18   | e        | 744.25                               | 7.79635                | YES             | YES   |
| 19   | a        | 817.45                               | 83.61421               | YES             | YES   |
| 20   | e        | 884.17                               | 133.09786              | YES             | YES   |
| 21   | e        | 884.17                               | 133.09786              | YES             | YES   |
| 22   | e        | 1240.82                              | 78.24857               | YES             | YES   |
| 23   | e        | 1240.82                              | 78.24857               | YES             | YES   |
| 24   | a        | 1246.85                              | 0.01078                | YES             | YES   |
| 25   | e        | 1360.82                              | 11.77859               | YES             | YES   |
| 26   | e        | 1360.82                              | 11.77859               | YES             | YES   |
| 27   | e        | 1362.48                              | 0.03821                | YES             | YES   |
| 28   | e        | 1362.48                              | 0.03821                | YES             | YES   |
| 29   | a        | 1368.79                              | 30.43935               | YES             | YES   |
| 30   | a        | 1370.52                              | 16.92580               | YES             | YES   |
| 31   | e        | 2924.99                              | 45.94410               | YES             | YES   |
| 32   | e        | 2924.99                              | 45.94410               | YES             | YES   |
| 33   | a        | 2930.16                              | 0.01873                | YES             | YES   |
| 34   | a        | 3000.05                              | 44.64866               | YES             | YES   |
| 35   | e        | 3000.43                              | 0.00312                | YES             | YES   |
| 36   | e        | 3000.43                              | 0.00312                | YES             | YES   |
| 37   | e        | 3067.24                              | 14.43421               | YES             | YES   |
| 38   | e        | 3067.24                              | 14.43421               | YES             | YES   |
| 39   | a        | 3067.87                              | 0.00009                | YES             | YES   |

TMSF

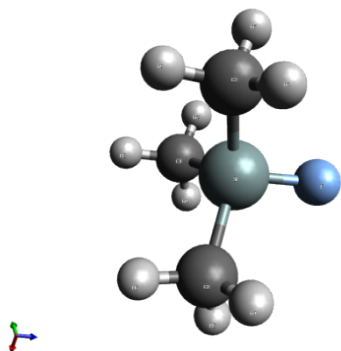

### Atomic coordinates

|    |          |          |          |
|----|----------|----------|----------|
| Si | 0.00000  | 0.00000  | 0.43656  |
| C  | 0.89918  | 1.55743  | -0.12081 |
| H  | 1.94641  | 1.57282  | 0.25497  |
| H  | 0.38890  | 2.47205  | 0.25497  |
| H  | 0.93549  | 1.62032  | -1.23189 |
| C  | 0.89918  | -1.55743 | -0.12081 |
| H  | 0.38890  | -2.47205 | 0.25497  |
| H  | 1.94641  | -1.57282 | 0.25497  |
| H  | 0.93549  | -1.62032 | -1.23189 |
| C  | -1.79837 | 0.00000  | -0.12081 |
| H  | -2.33531 | 0.89923  | 0.25497  |
| H  | -2.33531 | -0.89923 | 0.25497  |
| H  | -1.87098 | 0.00000  | -1.23189 |
| F  | -0.00000 | 0.00000  | 2.09200  |

### Vibrational analysis

| mode | symmetry | wave number<br>cm <sup>**</sup> (-1) | IR intensity<br>km/mol | selection rules |       |
|------|----------|--------------------------------------|------------------------|-----------------|-------|
|      |          |                                      |                        | IR              | RAMAN |
| 1    |          | -0.00                                | 0.00000                | -               | -     |
| 2    |          | -0.00                                | 0.00000                | -               | -     |
| 3    |          | 0.00                                 | 0.00000                | -               | -     |
| 4    |          | 0.00                                 | 0.00000                | -               | -     |
| 5    |          | 0.00                                 | 0.00000                | -               | -     |
| 6    |          | 0.00                                 | 0.00000                | -               | -     |
| 7    | a2       | 135.92                               | 0.00000                | NO              | NO    |
| 8    | e        | 155.63                               | 0.00402                | YES             | YES   |
| 9    | e        | 155.63                               | 0.00402                | YES             | YES   |
| 10   | e        | 186.86                               | 0.07200                | YES             | YES   |
| 11   | e        | 186.86                               | 0.07200                | YES             | YES   |
| 12   | a1       | 224.21                               | 0.11033                | YES             | YES   |
| 13   | e        | 265.24                               | 12.10160               | YES             | YES   |
| 14   | e        | 265.24                               | 12.10160               | YES             | YES   |
| 15   | a1       | 589.66                               | 0.03853                | YES             | YES   |
| 16   | a2       | 666.55                               | 0.00000                | NO              | NO    |
| 17   | e        | 676.35                               | 2.60368                | YES             | YES   |
| 18   | e        | 676.35                               | 2.60368                | YES             | YES   |
| 19   | e        | 753.74                               | 29.29597               | YES             | YES   |
| 20   | e        | 753.74                               | 29.29597               | YES             | YES   |
| 21   | a1       | 770.19                               | 3.59849                | YES             | YES   |
| 22   | e        | 853.03                               | 137.48691              | YES             | YES   |
| 23   | e        | 853.03                               | 137.48691              | YES             | YES   |

|    |    |         |           |     |     |
|----|----|---------|-----------|-----|-----|
| 24 | a1 | 909.11  | 168.56407 | YES | YES |
| 25 | e  | 1246.92 | 46.83500  | YES | YES |
| 26 | e  | 1246.92 | 46.83500  | YES | YES |
| 27 | a1 | 1254.34 | 16.08381  | YES | YES |
| 28 | a2 | 1390.64 | 0.00000   | NO  | NO  |
| 29 | e  | 1398.14 | 0.06431   | YES | YES |
| 30 | e  | 1398.14 | 0.06431   | YES | YES |
| 31 | e  | 1404.35 | 4.83497   | YES | YES |
| 32 | e  | 1404.35 | 4.83497   | YES | YES |
| 33 | a1 | 1415.88 | 15.92780  | YES | YES |
| 34 | e  | 2941.28 | 3.39472   | YES | YES |
| 35 | e  | 2941.28 | 3.39472   | YES | YES |
| 36 | a1 | 2943.45 | 1.24516   | YES | YES |
| 37 | e  | 3031.56 | 0.75640   | YES | YES |
| 38 | e  | 3031.56 | 0.75640   | YES | YES |
| 39 | a1 | 3034.00 | 16.62908  | YES | YES |
| 40 | a2 | 3038.02 | 0.00000   | NO  | NO  |
| 41 | e  | 3038.66 | 8.78859   | YES | YES |
| 42 | e  | 3038.66 | 8.78859   | YES | YES |

### TMSH

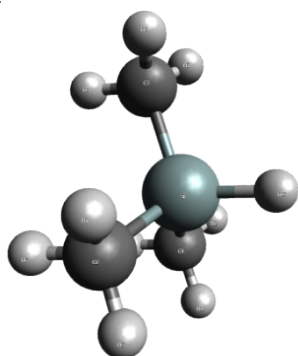

### Atomic coordinates

|    |          |          |          |
|----|----------|----------|----------|
| Si | 0.00000  | 0.00000  | 0.49410  |
| C  | 0.89905  | 1.55720  | -0.11149 |
| H  | 1.95111  | 1.58171  | 0.25071  |
| H  | 0.39424  | 2.48057  | 0.25071  |
| H  | 0.92177  | 1.59656  | -1.22407 |
| C  | 0.89905  | -1.55720 | -0.11149 |
| H  | 0.39424  | -2.48057 | 0.25071  |
| H  | 1.95111  | -1.58171 | 0.25071  |
| H  | 0.92177  | -1.59656 | -1.22407 |
| C  | -1.79810 | 0.00000  | -0.11149 |
| H  | -2.34536 | 0.89886  | 0.25071  |
| H  | -2.34536 | -0.89886 | 0.25071  |
| H  | -1.84354 | 0.00000  | -1.22407 |
| H  | 0.00000  | 0.00000  | 2.00859  |

### Vibrational analysis

| mode | symmetry | wave number<br>cm**(-1) | IR intensity<br>km/mol | selection rules |       |
|------|----------|-------------------------|------------------------|-----------------|-------|
|      |          |                         |                        | IR              | RAMAN |
| 1    |          | -0.00                   | 0.00000                | -               | -     |
| 2    |          | -0.00                   | 0.00000                | -               | -     |

|    |    |         |           |     |     |
|----|----|---------|-----------|-----|-----|
| 3  |    | -0.00   | 0.00000   | -   | -   |
| 4  |    | -0.00   | 0.00000   | -   | -   |
| 5  |    | -0.00   | 0.00000   | -   | -   |
| 6  |    | 0.00    | 0.00000   | -   | -   |
| 7  | a2 | 154.19  | 0.00000   | NO  | NO  |
| 8  | e  | 167.58  | 0.00016   | YES | YES |
| 9  | e  | 167.58  | 0.00016   | YES | YES |
| 10 | e  | 199.14  | 0.60512   | YES | YES |
| 11 | e  | 199.14  | 0.60512   | YES | YES |
| 12 | a1 | 230.68  | 0.91663   | YES | YES |
| 13 | a1 | 599.53  | 1.44165   | YES | YES |
| 14 | e  | 603.12  | 7.13510   | YES | YES |
| 15 | e  | 603.12  | 7.13510   | YES | YES |
| 16 | a2 | 669.19  | 0.00000   | NO  | NO  |
| 17 | e  | 689.08  | 11.15726  | YES | YES |
| 18 | e  | 689.08  | 11.15726  | YES | YES |
| 19 | e  | 834.77  | 15.44621  | YES | YES |
| 20 | e  | 834.77  | 15.44621  | YES | YES |
| 21 | a1 | 857.13  | 69.93309  | YES | YES |
| 22 | e  | 889.84  | 163.14323 | YES | YES |
| 23 | e  | 889.84  | 163.14323 | YES | YES |
| 24 | e  | 1239.93 | 30.83601  | YES | YES |
| 25 | e  | 1239.93 | 30.83601  | YES | YES |
| 26 | a1 | 1250.47 | 6.02253   | YES | YES |
| 27 | a2 | 1395.73 | 0.00000   | NO  | NO  |
| 28 | e  | 1400.44 | 0.32430   | YES | YES |
| 29 | e  | 1400.44 | 0.32430   | YES | YES |
| 30 | e  | 1409.47 | 4.98149   | YES | YES |
| 31 | e  | 1409.47 | 4.98149   | YES | YES |
| 32 | a1 | 1417.04 | 13.85350  | YES | YES |
| 33 | a1 | 2135.76 | 162.32938 | YES | YES |
| 34 | e  | 2938.17 | 8.17543   | YES | YES |
| 35 | e  | 2938.17 | 8.17543   | YES | YES |
| 36 | a1 | 2939.07 | 2.70072   | YES | YES |
| 37 | e  | 3028.28 | 0.80092   | YES | YES |
| 38 | e  | 3028.28 | 0.80092   | YES | YES |
| 39 | a1 | 3029.72 | 21.92102  | YES | YES |
| 40 | a2 | 3033.35 | 0.00000   | NO  | NO  |
| 41 | e  | 3033.77 | 12.29847  | YES | YES |
| 42 | e  | 3033.77 | 12.29847  | YES | YES |

B(C<sub>6</sub>F<sub>5</sub>)<sub>3</sub>

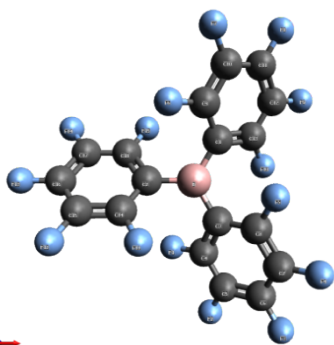

 Atomic coordinates

|   |            |            |            |
|---|------------|------------|------------|
| B | 0.0000000  | 0.0000000  | 0.0000000  |
| C | 0.7834617  | -1.3569954 | 0.0000000  |
| C | -1.5669234 | 0.0000000  | 0.0000000  |
| C | 0.7834617  | 1.3569954  | 0.0000000  |
| C | 0.3339335  | 2.4787778  | 0.7306595  |
| C | 1.0258822  | 3.6981330  | 0.7514839  |
| C | 2.2084332  | 3.8251184  | 0.0000000  |
| C | 2.6897360  | 2.7375066  | -0.7514839 |
| C | 1.9797178  | 1.5285838  | -0.7306595 |
| C | 0.3339335  | -2.4787778 | -0.7306595 |
| C | 1.0258822  | -3.6981330 | -0.7514839 |
| C | 2.2084332  | -3.8251184 | 0.0000000  |
| C | 2.6897360  | -2.7375066 | 0.7514839  |
| C | 1.9797178  | -1.5285838 | 0.7306595  |
| C | -2.3136513 | 0.9501940  | -0.7306595 |
| C | -3.7156182 | 0.9606264  | -0.7514839 |
| C | -4.4168663 | 0.0000000  | 0.0000000  |
| C | -3.7156182 | -0.9606264 | 0.7514839  |
| C | -2.3136513 | -0.9501940 | 0.7306595  |
| F | -0.7819149 | 2.4000971  | 1.4733842  |
| F | 0.5803408  | 4.7319535  | 1.4701518  |
| F | 2.8741026  | 4.9780917  | 0.0000000  |
| F | 3.8078215  | 2.8685667  | -1.4701518 |
| F | 2.4695026  | 0.5228904  | -1.4733842 |
| F | -0.7819149 | -2.4000971 | -1.4733842 |
| F | 0.5803408  | -4.7319535 | -1.4701518 |
| F | 2.8741026  | -4.9780917 | 0.0000000  |
| F | 3.8078215  | -2.8685667 | 1.4701518  |
| F | 2.4695026  | -0.5228904 | 1.4733842  |
| F | -1.6875876 | 1.8772068  | -1.4733842 |
| F | -4.3881624 | 1.8633869  | -1.4701518 |
| F | -5.7482051 | 0.0000000  | 0.0000000  |
| F | -4.3881624 | -1.8633869 | 1.4701518  |
| F | -1.6875876 | -1.8772068 | 1.4733842  |

### Vibrational analysis

| mode | symmetry | wave number<br>cm**(-1) | IR intensity<br>km/mol | selection rules |       |
|------|----------|-------------------------|------------------------|-----------------|-------|
|      |          |                         |                        | IR              | RAMAN |
| 1    |          | -0.00                   | 0.00000                | -               | -     |
| 2    |          | 0.00                    | 0.00000                | -               | -     |
| 3    |          | 0.00                    | 0.00000                | -               | -     |
| 4    |          | 0.00                    | 0.00000                | -               | -     |
| 5    |          | 0.00                    | 0.00000                | -               | -     |
| 6    |          | 0.00                    | 0.00000                | -               | -     |
| 7    | e        | 18.72                   | 0.46396                | YES             | YES   |
| 8    | e        | 18.72                   | 0.46396                | YES             | YES   |
| 9    | a2       | 31.36                   | 0.00737                | YES             | NO    |
| 10   | e        | 31.47                   | 0.01787                | YES             | YES   |
| 11   | e        | 31.47                   | 0.01787                | YES             | YES   |
| 12   | a1       | 36.98                   | 0.00000                | NO              | YES   |
| 13   | a2       | 101.19                  | 0.06859                | YES             | NO    |
| 14   | e        | 106.24                  | 0.07407                | YES             | YES   |
| 15   | e        | 106.24                  | 0.07407                | YES             | YES   |
| 16   | e        | 124.89                  | 0.42610                | YES             | YES   |

|    |    |        |           |     |     |
|----|----|--------|-----------|-----|-----|
| 17 | e  | 124.89 | 0.42610   | YES | YES |
| 18 | a1 | 125.98 | 0.00000   | NO  | YES |
| 19 | e  | 141.95 | 0.02937   | YES | YES |
| 20 | e  | 141.95 | 0.02937   | YES | YES |
| 21 | a2 | 147.19 | 0.00466   | YES | NO  |
| 22 | e  | 153.84 | 0.16692   | YES | YES |
| 23 | e  | 153.84 | 0.16692   | YES | YES |
| 24 | a1 | 156.14 | 0.00000   | NO  | YES |
| 25 | a2 | 219.51 | 3.77763   | YES | NO  |
| 26 | e  | 223.95 | 3.58364   | YES | YES |
| 27 | e  | 223.95 | 3.58364   | YES | YES |
| 28 | a2 | 262.81 | 0.02089   | YES | NO  |
| 29 | e  | 263.01 | 0.24328   | YES | YES |
| 30 | e  | 263.01 | 0.24328   | YES | YES |
| 31 | e  | 269.81 | 0.14677   | YES | YES |
| 32 | e  | 269.81 | 0.14677   | YES | YES |
| 33 | a1 | 271.07 | 0.00000   | NO  | YES |
| 34 | e  | 307.44 | 0.06713   | YES | YES |
| 35 | e  | 307.44 | 0.06713   | YES | YES |
| 36 | a2 | 307.45 | 1.57146   | YES | NO  |
| 37 | e  | 340.61 | 2.73309   | YES | YES |
| 38 | e  | 340.61 | 2.73309   | YES | YES |
| 39 | a2 | 345.31 | 0.05154   | YES | NO  |
| 40 | a1 | 349.72 | 0.00000   | NO  | YES |
| 41 | e  | 377.20 | 6.46685   | YES | YES |
| 42 | e  | 377.20 | 6.46685   | YES | YES |
| 43 | e  | 390.68 | 1.32793   | YES | YES |
| 44 | e  | 390.68 | 1.32793   | YES | YES |
| 45 | a1 | 391.44 | 0.00000   | NO  | YES |
| 46 | a2 | 429.96 | 0.46799   | YES | NO  |
| 47 | e  | 431.25 | 0.26410   | YES | YES |
| 48 | e  | 431.25 | 0.26410   | YES | YES |
| 49 | e  | 460.04 | 4.51967   | YES | YES |
| 50 | e  | 460.04 | 4.51967   | YES | YES |
| 51 | a1 | 486.24 | 0.00000   | NO  | YES |
| 52 | a2 | 493.67 | 0.07742   | YES | NO  |
| 53 | e  | 505.74 | 0.02409   | YES | YES |
| 54 | e  | 505.74 | 0.02409   | YES | YES |
| 55 | a2 | 533.28 | 1.87280   | YES | NO  |
| 56 | e  | 564.02 | 2.96581   | YES | YES |
| 57 | e  | 564.02 | 2.96581   | YES | YES |
| 58 | a1 | 566.58 | 0.00000   | NO  | YES |
| 59 | e  | 617.53 | 26.76263  | YES | YES |
| 60 | e  | 617.53 | 26.76263  | YES | YES |
| 61 | e  | 631.38 | 1.83876   | YES | YES |
| 62 | e  | 631.38 | 1.83876   | YES | YES |
| 63 | a1 | 633.74 | 0.00000   | NO  | YES |
| 64 | e  | 664.87 | 24.48621  | YES | YES |
| 65 | e  | 664.87 | 24.48621  | YES | YES |
| 66 | a2 | 675.85 | 6.62506   | YES | NO  |
| 67 | e  | 770.59 | 23.92494  | YES | YES |
| 68 | e  | 770.59 | 23.92494  | YES | YES |
| 69 | a2 | 773.30 | 2.69285   | YES | NO  |
| 70 | a1 | 855.79 | 0.00000   | NO  | YES |
| 71 | a2 | 982.48 | 183.87296 | YES | NO  |

|     |    |         |           |     |     |
|-----|----|---------|-----------|-----|-----|
| 72  | e  | 984.07  | 64.04209  | YES | YES |
| 73  | e  | 984.07  | 64.04209  | YES | YES |
| 74  | e  | 1024.00 | 126.53424 | YES | YES |
| 75  | e  | 1024.00 | 126.53424 | YES | YES |
| 76  | a1 | 1116.35 | 0.00000   | NO  | YES |
| 77  | a2 | 1151.47 | 7.06988   | YES | NO  |
| 78  | e  | 1154.83 | 14.98724  | YES | YES |
| 79  | e  | 1154.83 | 14.98724  | YES | YES |
| 80  | e  | 1185.19 | 181.69897 | YES | YES |
| 81  | e  | 1185.19 | 181.69897 | YES | YES |
| 82  | a1 | 1302.18 | 0.00000   | NO  | YES |
| 83  | e  | 1318.04 | 162.25277 | YES | YES |
| 84  | e  | 1318.04 | 162.25277 | YES | YES |
| 85  | a2 | 1347.57 | 0.01812   | YES | NO  |
| 86  | e  | 1351.63 | 6.56530   | YES | YES |
| 87  | e  | 1351.63 | 6.56530   | YES | YES |
| 88  | e  | 1382.76 | 323.51309 | YES | YES |
| 89  | e  | 1382.76 | 323.51309 | YES | YES |
| 90  | a1 | 1399.11 | 0.00000   | NO  | YES |
| 91  | a2 | 1472.65 | 456.85941 | YES | NO  |
| 92  | e  | 1482.35 | 628.43438 | YES | YES |
| 93  | e  | 1482.35 | 628.43438 | YES | YES |
| 94  | e  | 1518.16 | 241.50454 | YES | YES |
| 95  | e  | 1518.16 | 241.50454 | YES | YES |
| 96  | a1 | 1520.14 | 0.00000   | NO  | YES |
| 97  | a2 | 1608.75 | 21.07254  | YES | NO  |
| 98  | e  | 1611.12 | 5.93169   | YES | YES |
| 99  | e  | 1611.12 | 5.93169   | YES | YES |
| 100 | e  | 1631.96 | 198.22814 | YES | YES |
| 101 | e  | 1631.96 | 198.22814 | YES | YES |
| 102 | a1 | 1633.40 | 0.00000   | NO  | YES |

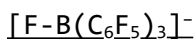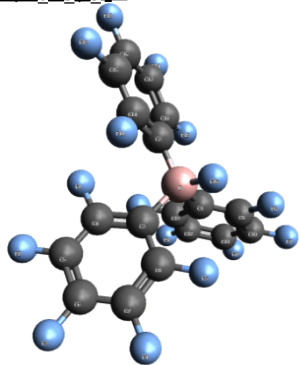

Atomic coordinates

|   |          |          |          |
|---|----------|----------|----------|
| B | -0.22898 | -0.07327 | -0.90178 |
| C | 0.65568  | -1.37570 | -0.38619 |
| C | -1.74794 | -0.00998 | -0.24435 |
| C | 0.70832  | 1.24821  | -0.51289 |
| C | 0.48745  | 2.16586  | 0.52455  |
| C | 1.34226  | 3.25005  | 0.79472  |
| C | 2.49361  | 3.42987  | 0.01464  |
| C | 2.76868  | 2.52675  | -1.02317 |
| C | 1.88498  | 1.45745  | -1.25334 |



|   |          |          |          |
|---|----------|----------|----------|
| C | 1.12093  | -2.40063 | -1.22465 |
| C | 1.94643  | -3.44712 | -0.76632 |
| C | 2.32953  | -3.49130 | 0.58125  |
| C | 1.87839  | -2.49197 | 1.45820  |
| C | 1.06239  | -1.46814 | 0.95423  |
| C | -2.54643 | 1.11597  | -0.51065 |
| C | -3.87351 | 1.25225  | -0.07469 |
| C | -4.46199 | 0.20809  | 0.65657  |
| C | -3.71204 | -0.94182 | 0.93655  |
| C | -2.38428 | -1.03144 | 0.47416  |
| F | -0.58363 | 2.05764  | 1.34056  |
| F | 1.07682  | 4.11147  | 1.79706  |
| F | 3.32640  | 4.45983  | 0.25809  |
| F | 3.88068  | 2.68581  | -1.76852 |
| F | 2.23444  | 0.60516  | -2.23798 |
| F | 0.79282  | -2.45131 | -2.52897 |
| F | 2.37146  | -4.41107 | -1.60816 |
| F | 3.11565  | -4.48733 | 1.03321  |
| F | 2.23131  | -2.53336 | 2.75850  |
| F | 0.63950  | -0.54439 | 1.84829  |
| F | -2.04177 | 2.15627  | -1.20686 |
| F | -4.58996 | 2.36090  | -0.34687 |
| F | -5.73503 | 0.31117  | 1.08258  |
| F | -4.27506 | -1.95305 | 1.62769  |
| F | -1.75270 | -2.19056 | 0.76751  |
| F | -0.41443 | -0.10028 | -2.31296 |

### Vibrational analysis

| mode | symmetry | wave number<br>cm**(-1) | IR intensity<br>km/mol | selection rules |       |
|------|----------|-------------------------|------------------------|-----------------|-------|
|      |          |                         |                        | IR              | RAMAN |
| 1    |          | -0.00                   | 0.00000                | -               | -     |
| 2    |          | 0.00                    | 0.00000                | -               | -     |
| 3    |          | 0.00                    | 0.00000                | -               | -     |
| 4    |          | 0.00                    | 0.00000                | -               | -     |
| 5    |          | 0.00                    | 0.00000                | -               | -     |
| 6    |          | 0.00                    | 0.00000                | -               | -     |
| 7    | a        | 16.74                   | 0.00971                | YES             | YES   |
| 8    | a        | 22.68                   | 0.03094                | YES             | YES   |
| 9    | a        | 26.55                   | 0.00676                | YES             | YES   |
| 10   | a        | 31.42                   | 0.00421                | YES             | YES   |
| 11   | a        | 38.20                   | 0.09017                | YES             | YES   |
| 12   | a        | 40.18                   | 0.02233                | YES             | YES   |
| 13   | a        | 94.70                   | 0.18485                | YES             | YES   |
| 14   | a        | 105.12                  | 0.15464                | YES             | YES   |
| 15   | a        | 112.02                  | 0.08971                | YES             | YES   |
| 16   | a        | 123.02                  | 0.03298                | YES             | YES   |
| 17   | a        | 126.03                  | 0.03316                | YES             | YES   |
| 18   | a        | 131.28                  | 0.17122                | YES             | YES   |
| 19   | a        | 133.05                  | 0.02901                | YES             | YES   |
| 20   | a        | 145.05                  | 0.18440                | YES             | YES   |
| 21   | a        | 147.57                  | 0.10397                | YES             | YES   |
| 22   | a        | 157.25                  | 0.01410                | YES             | YES   |
| 23   | a        | 158.57                  | 0.08667                | YES             | YES   |
| 24   | a        | 164.28                  | 0.08317                | YES             | YES   |

|    |   |         |           |     |     |
|----|---|---------|-----------|-----|-----|
| 25 | a | 201.41  | 2.69124   | YES | YES |
| 26 | a | 215.30  | 1.67158   | YES | YES |
| 27 | a | 225.96  | 1.80099   | YES | YES |
| 28 | a | 236.92  | 0.64783   | YES | YES |
| 29 | a | 246.63  | 0.90606   | YES | YES |
| 30 | a | 261.19  | 0.06193   | YES | YES |
| 31 | a | 261.63  | 0.05858   | YES | YES |
| 32 | a | 261.81  | 0.07653   | YES | YES |
| 33 | a | 270.09  | 0.12558   | YES | YES |
| 34 | a | 271.00  | 0.05817   | YES | YES |
| 35 | a | 272.12  | 0.12344   | YES | YES |
| 36 | a | 305.97  | 0.39144   | YES | YES |
| 37 | a | 307.86  | 0.20251   | YES | YES |
| 38 | a | 308.48  | 0.31106   | YES | YES |
| 39 | a | 315.04  | 1.06823   | YES | YES |
| 40 | a | 340.91  | 3.55914   | YES | YES |
| 41 | a | 345.12  | 2.29898   | YES | YES |
| 42 | a | 349.87  | 0.78970   | YES | YES |
| 43 | a | 367.04  | 0.30311   | YES | YES |
| 44 | a | 385.00  | 0.06783   | YES | YES |
| 45 | a | 387.28  | 0.08366   | YES | YES |
| 46 | a | 388.53  | 0.11373   | YES | YES |
| 47 | a | 397.79  | 1.16029   | YES | YES |
| 48 | a | 426.66  | 0.37649   | YES | YES |
| 49 | a | 434.05  | 0.05532   | YES | YES |
| 50 | a | 434.88  | 0.19232   | YES | YES |
| 51 | a | 435.33  | 0.09541   | YES | YES |
| 52 | a | 465.13  | 2.10995   | YES | YES |
| 53 | a | 467.86  | 1.25645   | YES | YES |
| 54 | a | 483.80  | 0.02273   | YES | YES |
| 55 | a | 494.72  | 0.19477   | YES | YES |
| 56 | a | 496.26  | 0.07702   | YES | YES |
| 57 | a | 503.03  | 0.03609   | YES | YES |
| 58 | a | 562.39  | 5.08093   | YES | YES |
| 59 | a | 563.33  | 3.29133   | YES | YES |
| 60 | a | 565.00  | 0.06943   | YES | YES |
| 61 | a | 593.21  | 20.47027  | YES | YES |
| 62 | a | 614.35  | 35.56013  | YES | YES |
| 63 | a | 626.22  | 0.66747   | YES | YES |
| 64 | a | 629.04  | 0.30157   | YES | YES |
| 65 | a | 630.80  | 0.03494   | YES | YES |
| 66 | a | 645.58  | 4.86504   | YES | YES |
| 67 | a | 683.01  | 60.93894  | YES | YES |
| 68 | a | 706.08  | 92.55773  | YES | YES |
| 69 | a | 747.54  | 4.45169   | YES | YES |
| 70 | a | 751.69  | 34.39234  | YES | YES |
| 71 | a | 759.33  | 33.92413  | YES | YES |
| 72 | a | 811.58  | 10.40171  | YES | YES |
| 73 | a | 905.13  | 8.12259   | YES | YES |
| 74 | a | 936.78  | 23.67051  | YES | YES |
| 75 | a | 968.89  | 75.17850  | YES | YES |
| 76 | a | 972.73  | 243.23854 | YES | YES |
| 77 | a | 980.23  | 218.82513 | YES | YES |
| 78 | a | 1029.17 | 5.88795   | YES | YES |
| 79 | a | 1084.21 | 189.02098 | YES | YES |

|     |   |         |           |     |     |
|-----|---|---------|-----------|-----|-----|
| 80  | a | 1087.12 | 109.33459 | YES | YES |
| 81  | a | 1096.23 | 399.25044 | YES | YES |
| 82  | a | 1124.08 | 2.12866   | YES | YES |
| 83  | a | 1129.41 | 3.24181   | YES | YES |
| 84  | a | 1132.96 | 2.42007   | YES | YES |
| 85  | a | 1262.04 | 45.30432  | YES | YES |
| 86  | a | 1265.08 | 57.75380  | YES | YES |
| 87  | a | 1266.75 | 39.83310  | YES | YES |
| 88  | a | 1349.56 | 5.80585   | YES | YES |
| 89  | a | 1352.56 | 5.39959   | YES | YES |
| 90  | a | 1354.51 | 1.38633   | YES | YES |
| 91  | a | 1370.03 | 23.24218  | YES | YES |
| 92  | a | 1376.71 | 18.58981  | YES | YES |
| 93  | a | 1385.46 | 0.31978   | YES | YES |
| 94  | a | 1455.43 | 219.96879 | YES | YES |
| 95  | a | 1465.45 | 328.57673 | YES | YES |
| 96  | a | 1469.75 | 749.70441 | YES | YES |
| 97  | a | 1504.21 | 172.36132 | YES | YES |
| 98  | a | 1505.68 | 247.07692 | YES | YES |
| 99  | a | 1508.45 | 23.85032  | YES | YES |
| 100 | a | 1614.26 | 6.97706   | YES | YES |
| 101 | a | 1616.05 | 8.81057   | YES | YES |
| 102 | a | 1617.86 | 3.16168   | YES | YES |
| 103 | a | 1622.03 | 48.57268  | YES | YES |
| 104 | a | 1624.77 | 49.14303  | YES | YES |
| 105 | a | 1626.74 | 12.58045  | YES | YES |

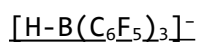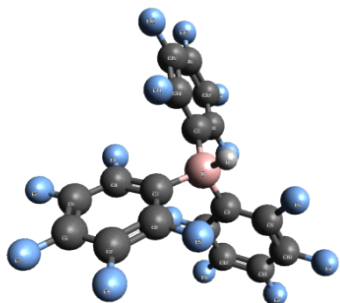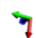

Atomic coordinates

|   |          |          |          |
|---|----------|----------|----------|
| B | -0.16240 | -0.07625 | -0.78713 |
| C | 0.69245  | -1.38524 | -0.30467 |
| C | -1.69811 | -0.00872 | -0.23284 |
| C | 0.72744  | 1.25840  | -0.44325 |
| C | 0.48189  | 2.17877  | 0.58787  |
| C | 1.28864  | 3.30555  | 0.82958  |
| C | 2.41721  | 3.52972  | 0.02736  |
| C | 2.71381  | 2.62989  | -1.00813 |
| C | 1.87397  | 1.52181  | -1.21366 |
| C | 1.00742  | -2.43911 | -1.17603 |
| C | 1.79634  | -3.54154 | -0.79685 |
| C | 2.29985  | -3.61024 | 0.51046  |
| C | 2.00385  | -2.58247 | 1.42027  |
| C | 1.21470  | -1.50270 | 0.99313  |

|   |          |          |          |
|---|----------|----------|----------|
| C | -2.51061 | 1.07657  | -0.61109 |
| C | -3.85827 | 1.21443  | -0.24564 |
| C | -4.45817 | 0.21891  | 0.54234  |
| C | -3.69604 | -0.88768 | 0.94019  |
| C | -2.34630 | -0.97878 | 0.54816  |
| F | -0.56973 | 2.02211  | 1.42111  |
| F | 1.00325  | 4.16358  | 1.82995  |
| F | 3.20742  | 4.59917  | 0.24628  |
| F | 3.79856  | 2.83776  | -1.78245 |
| F | 2.22260  | 0.68877  | -2.21800 |
| F | 0.55121  | -2.44881 | -2.44568 |
| F | 2.07523  | -4.53171 | -1.66947 |
| F | 3.05553  | -4.65796 | 0.89338  |
| F | 2.47621  | -2.65217 | 2.68122  |
| F | 0.94097  | -0.55589 | 1.91779  |
| F | -1.99455 | 2.06766  | -1.37210 |
| F | -4.58342 | 2.28176  | -0.63736 |
| F | -5.75152 | 0.32492  | 0.90617  |
| F | -4.26389 | -1.85159 | 1.69334  |
| F | -1.69632 | -2.08635 | 0.97519  |
| H | -0.25921 | -0.12258 | -2.01943 |

#### Vibrational analysis

| mode | symmetry | wave number<br>cm**(-1) | IR intensity<br>km/mol | selection rules |       |
|------|----------|-------------------------|------------------------|-----------------|-------|
|      |          |                         |                        | IR              | RAMAN |
| 1    |          | -0.00                   | 0.00000                | -               | -     |
| 2    |          | -0.00                   | 0.00000                | -               | -     |
| 3    |          | -0.00                   | 0.00000                | -               | -     |
| 4    |          | -0.00                   | 0.00000                | -               | -     |
| 5    |          | 0.00                    | 0.00000                | -               | -     |
| 6    |          | 0.00                    | 0.00000                | -               | -     |
| 7    | a        | 11.40                   | 0.00781                | YES             | YES   |
| 8    | a        | 19.58                   | 0.01224                | YES             | YES   |
| 9    | a        | 24.07                   | 0.01246                | YES             | YES   |
| 10   | a        | 28.61                   | 0.01668                | YES             | YES   |
| 11   | a        | 36.95                   | 0.01281                | YES             | YES   |
| 12   | a        | 38.25                   | 0.09055                | YES             | YES   |
| 13   | a        | 96.85                   | 0.16457                | YES             | YES   |
| 14   | a        | 102.00                  | 0.06658                | YES             | YES   |
| 15   | a        | 111.70                  | 0.08953                | YES             | YES   |
| 16   | a        | 123.83                  | 0.01042                | YES             | YES   |
| 17   | a        | 124.69                  | 0.00284                | YES             | YES   |
| 18   | a        | 129.59                  | 0.00716                | YES             | YES   |
| 19   | a        | 132.89                  | 0.03931                | YES             | YES   |
| 20   | a        | 144.54                  | 0.12206                | YES             | YES   |
| 21   | a        | 146.81                  | 0.02650                | YES             | YES   |
| 22   | a        | 157.76                  | 0.02121                | YES             | YES   |
| 23   | a        | 160.38                  | 0.01506                | YES             | YES   |
| 24   | a        | 163.82                  | 0.04614                | YES             | YES   |
| 25   | a        | 218.10                  | 1.52328                | YES             | YES   |
| 26   | a        | 219.32                  | 1.21943                | YES             | YES   |
| 27   | a        | 227.97                  | 1.81053                | YES             | YES   |
| 28   | a        | 260.64                  | 0.02972                | YES             | YES   |
| 29   | a        | 260.86                  | 0.03173                | YES             | YES   |

|    |   |         |           |     |     |
|----|---|---------|-----------|-----|-----|
| 30 | a | 261.38  | 0.03451   | YES | YES |
| 31 | a | 268.32  | 0.06824   | YES | YES |
| 32 | a | 269.84  | 0.04760   | YES | YES |
| 33 | a | 271.14  | 0.06670   | YES | YES |
| 34 | a | 304.11  | 0.36433   | YES | YES |
| 35 | a | 305.68  | 0.86366   | YES | YES |
| 36 | a | 307.60  | 0.30772   | YES | YES |
| 37 | a | 333.93  | 0.25530   | YES | YES |
| 38 | a | 337.78  | 1.73722   | YES | YES |
| 39 | a | 338.98  | 2.25438   | YES | YES |
| 40 | a | 351.58  | 0.19553   | YES | YES |
| 41 | a | 359.15  | 0.89434   | YES | YES |
| 42 | a | 379.01  | 0.09106   | YES | YES |
| 43 | a | 386.37  | 0.05820   | YES | YES |
| 44 | a | 387.44  | 0.30900   | YES | YES |
| 45 | a | 388.46  | 0.05406   | YES | YES |
| 46 | a | 433.02  | 0.01199   | YES | YES |
| 47 | a | 433.63  | 0.05768   | YES | YES |
| 48 | a | 434.40  | 0.14924   | YES | YES |
| 49 | a | 453.74  | 1.48491   | YES | YES |
| 50 | a | 455.31  | 1.64226   | YES | YES |
| 51 | a | 470.34  | 0.00919   | YES | YES |
| 52 | a | 492.61  | 0.04975   | YES | YES |
| 53 | a | 496.54  | 0.00668   | YES | YES |
| 54 | a | 505.75  | 0.07610   | YES | YES |
| 55 | a | 529.85  | 0.85258   | YES | YES |
| 56 | a | 560.01  | 5.52809   | YES | YES |
| 57 | a | 561.16  | 4.53377   | YES | YES |
| 58 | a | 564.53  | 0.06618   | YES | YES |
| 59 | a | 584.69  | 8.93178   | YES | YES |
| 60 | a | 592.69  | 11.97998  | YES | YES |
| 61 | a | 624.57  | 0.20766   | YES | YES |
| 62 | a | 626.40  | 0.62963   | YES | YES |
| 63 | a | 630.10  | 0.39271   | YES | YES |
| 64 | a | 644.50  | 25.36682  | YES | YES |
| 65 | a | 663.25  | 3.19942   | YES | YES |
| 66 | a | 688.37  | 34.13539  | YES | YES |
| 67 | a | 740.26  | 11.95791  | YES | YES |
| 68 | a | 755.28  | 13.45912  | YES | YES |
| 69 | a | 769.22  | 1.85668   | YES | YES |
| 70 | a | 835.32  | 3.21874   | YES | YES |
| 71 | a | 889.21  | 69.88553  | YES | YES |
| 72 | a | 909.35  | 108.07630 | YES | YES |
| 73 | a | 960.34  | 93.63068  | YES | YES |
| 74 | a | 971.86  | 260.94870 | YES | YES |
| 75 | a | 976.72  | 189.66353 | YES | YES |
| 76 | a | 1028.69 | 8.59580   | YES | YES |
| 77 | a | 1042.63 | 58.79993  | YES | YES |
| 78 | a | 1080.39 | 18.51629  | YES | YES |
| 79 | a | 1094.39 | 178.35320 | YES | YES |
| 80 | a | 1108.35 | 235.26091 | YES | YES |
| 81 | a | 1123.57 | 3.97248   | YES | YES |
| 82 | a | 1127.94 | 5.78757   | YES | YES |
| 83 | a | 1129.80 | 6.42974   | YES | YES |
| 84 | a | 1262.04 | 30.99396  | YES | YES |

|     |   |         |           |     |     |
|-----|---|---------|-----------|-----|-----|
| 85  | a | 1263.10 | 7.40646   | YES | YES |
| 86  | a | 1265.25 | 46.34944  | YES | YES |
| 87  | a | 1350.00 | 13.19832  | YES | YES |
| 88  | a | 1353.29 | 6.24188   | YES | YES |
| 89  | a | 1354.49 | 1.84392   | YES | YES |
| 90  | a | 1375.78 | 13.19973  | YES | YES |
| 91  | a | 1380.20 | 3.46623   | YES | YES |
| 92  | a | 1384.98 | 4.31574   | YES | YES |
| 93  | a | 1458.68 | 309.41682 | YES | YES |
| 94  | a | 1465.98 | 253.77436 | YES | YES |
| 95  | a | 1469.56 | 548.85500 | YES | YES |
| 96  | a | 1501.21 | 223.58684 | YES | YES |
| 97  | a | 1502.48 | 304.66458 | YES | YES |
| 98  | a | 1506.01 | 30.78507  | YES | YES |
| 99  | a | 1612.36 | 3.26708   | YES | YES |
| 100 | a | 1615.05 | 4.03735   | YES | YES |
| 101 | a | 1615.76 | 5.68092   | YES | YES |
| 102 | a | 1620.56 | 27.54753  | YES | YES |
| 103 | a | 1622.47 | 26.41400  | YES | YES |
| 104 | a | 1624.25 | 5.55063   | YES | YES |
| 105 | a | 2392.69 | 84.22793  | YES | YES |

### SbF<sub>5</sub>

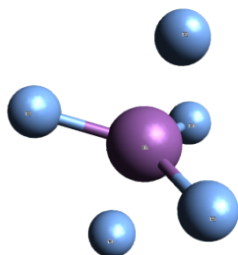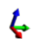

#### Atomic coordinates

|    |          |          |          |
|----|----------|----------|----------|
| Sb | -0.00000 | 0.00000  | 0.00000  |
| F  | 0.00000  | 0.00000  | -1.92422 |
| F  | 0.00000  | 0.00000  | 1.92422  |
| F  | -0.95686 | -1.65733 | 0.00000  |
| F  | -0.95686 | 1.65733  | 0.00000  |
| F  | 1.91372  | 0.00000  | 0.00000  |

#### Vibrational analysis

| mode | symmetry | wave number<br>cm <sup>**</sup> (-1) | IR intensity<br>km/mol | selection rules |       |
|------|----------|--------------------------------------|------------------------|-----------------|-------|
|      |          |                                      |                        | IR              | RAMAN |
| 1    |          | -0.00                                | 0.00000                | -               | -     |
| 2    |          | -0.00                                | 0.00000                | -               | -     |
| 3    |          | -0.00                                | 0.00000                | -               | -     |
| 4    |          | -0.00                                | 0.00000                | -               | -     |
| 5    |          | 0.00                                 | 0.00000                | -               | -     |
| 6    |          | 0.00                                 | 0.00000                | -               | -     |
| 7    | e'       | 91.81                                | 0.61255                | YES             | YES   |
| 8    | e'       | 91.81                                | 0.61255                | YES             | YES   |

|    |      |        |          |     |     |
|----|------|--------|----------|-----|-----|
| 9  | e'   | 236.60 | 40.54739 | YES | YES |
| 10 | e'   | 236.60 | 40.54739 | YES | YES |
| 11 | e''  | 246.90 | 0.00000  | NO  | YES |
| 12 | e''  | 246.90 | 0.00000  | NO  | YES |
| 13 | a2'' | 259.74 | 41.65984 | YES | NO  |
| 14 | a1'  | 597.49 | 0.00000  | NO  | YES |
| 15 | a1'  | 603.26 | 0.00000  | NO  | YES |
| 16 | a2'' | 663.38 | 73.29589 | YES | NO  |
| 17 | e'   | 666.88 | 65.05131 | YES | YES |
| 18 | e'   | 666.88 | 65.05131 | YES | YES |

[SbF<sub>6</sub>]<sup>-</sup>

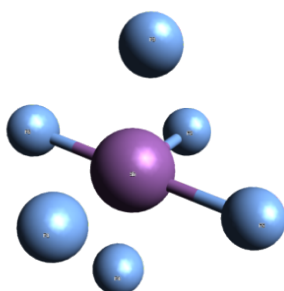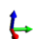

Atomic coordinates

|    |          |          |          |
|----|----------|----------|----------|
| Sb | -0.00000 | 0.00000  | 0.00000  |
| F  | 1.38218  | -1.38218 | -0.00000 |
| F  | -1.38218 | 1.38218  | -0.00000 |
| F  | 0.00000  | 0.00000  | 1.95575  |
| F  | 0.00000  | 0.00000  | -1.95575 |
| F  | 1.38218  | 1.38218  | -0.00000 |
| F  | -1.38218 | -1.38218 | -0.00000 |

Vibrational analysis

| mode | symmetry | wave number<br>cm <sup>-1</sup> | IR intensity<br>km/mol | selection rules |       |
|------|----------|---------------------------------|------------------------|-----------------|-------|
|      |          |                                 |                        | IR              | RAMAN |
| 1    |          | -0.00                           | 0.00000                | -               | -     |
| 2    |          | -0.00                           | 0.00000                | -               | -     |
| 3    |          | -0.00                           | 0.00000                | -               | -     |
| 4    |          | 0.00                            | 0.00000                | -               | -     |
| 5    |          | 0.00                            | 0.00000                | -               | -     |
| 6    |          | 0.00                            | 0.00000                | -               | -     |
| 7    | e        | 148.50                          | 0.06118                | YES             | YES   |
| 8    | e        | 148.50                          | 0.06118                | YES             | YES   |
| 9    | b2       | 150.46                          | 0.00000                | NO              | YES   |
| 10   | e        | 244.82                          | 0.00000                | YES             | YES   |
| 11   | e        | 244.82                          | 0.00000                | YES             | YES   |
| 12   | b1       | 248.29                          | 0.00000                | NO              | YES   |
| 13   | e        | 268.66                          | 53.77941               | YES             | YES   |
| 14   | e        | 268.66                          | 53.77941               | YES             | YES   |
| 15   | a1       | 270.08                          | 53.71609               | YES             | YES   |
| 16   | a1       | 551.14                          | 0.00000                | YES             | YES   |
| 17   | b2       | 551.58                          | 0.00000                | NO              | YES   |
| 18   | a1       | 568.35                          | 0.00000                | YES             | YES   |

|    |    |        |           |     |     |
|----|----|--------|-----------|-----|-----|
| 19 | a1 | 616.56 | 114.51528 | YES | YES |
| 20 | e  | 617.28 | 114.38467 | YES | YES |
| 21 | e  | 617.28 | 114.38467 | YES | YES |

Al(OR<sup>F</sup>)<sub>3</sub>

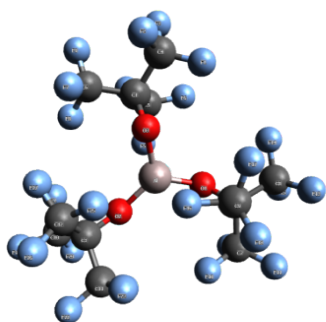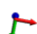

Atomic coordinates

|    |          |          |          |
|----|----------|----------|----------|
| Al | 0.12634  | -0.02702 | 0.17021  |
| O  | 1.78305  | 0.07559  | 0.75076  |
| O  | -0.84295 | 1.38409  | 0.27881  |
| O  | -0.46148 | -1.61339 | -0.29868 |
| C  | -0.98357 | -2.53448 | 0.57299  |
| C  | 2.86539  | 0.30165  | -0.05731 |
| C  | -1.76216 | 2.17694  | -0.34843 |
| C  | -0.44248 | -3.95828 | 0.19021  |
| F  | 0.87717  | -3.90046 | -0.04033 |
| F  | -1.04467 | -4.41104 | -0.92048 |
| F  | -0.66768 | -4.84034 | 1.18899  |
| C  | -0.53210 | -2.18764 | 2.04287  |
| F  | -1.38106 | -2.52547 | 2.99967  |
| F  | -0.42434 | -0.76476 | 2.08489  |
| F  | 0.68113  | -2.64036 | 2.33996  |
| C  | -2.55389 | -2.49732 | 0.48501  |
| F  | -2.94446 | -2.49182 | -0.79212 |
| F  | -3.00382 | -1.36207 | 1.06787  |
| F  | -3.11960 | -3.54646 | 1.11095  |
| C  | 3.25262  | 1.82566  | 0.00414  |
| F  | 2.32737  | 2.54643  | -0.67156 |
| F  | 4.45717  | 2.06374  | -0.54806 |
| F  | 3.26262  | 2.24811  | 1.27066  |
| C  | 4.06202  | -0.59131 | 0.43035  |
| F  | 5.03070  | -0.64715 | -0.51084 |
| F  | 3.63381  | -1.83720 | 0.67778  |
| F  | 4.59319  | -0.09546 | 1.55847  |
| C  | 2.50225  | -0.09002 | -1.53873 |
| F  | 1.10153  | 0.19631  | -1.67383 |
| F  | 2.61273  | -1.38979 | -1.78317 |
| F  | 3.11136  | 0.59848  | -2.48790 |
| C  | -2.82195 | 2.63493  | 0.71908  |
| F  | -3.91366 | 3.16225  | 0.12978  |
| F  | -2.29677 | 3.56112  | 1.54201  |
| F  | -3.20250 | 1.58737  | 1.46743  |
| C  | -1.01676 | 3.42856  | -0.94349 |
| F  | -1.87188 | 4.39996  | -1.31011 |



|   |          |         |          |
|---|----------|---------|----------|
| F | -0.30354 | 3.05691 | -2.03202 |
| F | -0.15971 | 3.92881 | -0.04455 |
| C | -2.48204 | 1.38981 | -1.50648 |
| F | -1.56944 | 0.61690 | -2.14724 |
| F | -3.05118 | 2.20222 | -2.40830 |
| F | -3.42679 | 0.56598 | -1.01927 |

### Vibrational analysis

| mode | symmetry | wave number<br>cm**(-1) | IR intensity<br>km/mol | selection rules |       |
|------|----------|-------------------------|------------------------|-----------------|-------|
|      |          |                         |                        | IR              | RAMAN |
| 1    |          | -0.00                   | 0.00000                | -               | -     |
| 2    |          | -0.00                   | 0.00000                | -               | -     |
| 3    |          | -0.00                   | 0.00000                | -               | -     |
| 4    |          | 0.00                    | 0.00000                | -               | -     |
| 5    |          | 0.00                    | 0.00000                | -               | -     |
| 6    |          | 0.00                    | 0.00000                | -               | -     |
| 7    | a        | 18.74                   | 0.04076                | YES             | YES   |
| 8    | a        | 23.10                   | 0.02245                | YES             | YES   |
| 9    | a        | 24.03                   | 0.03849                | YES             | YES   |
| 10   | a        | 26.29                   | 0.03613                | YES             | YES   |
| 11   | a        | 28.94                   | 0.02549                | YES             | YES   |
| 12   | a        | 37.32                   | 0.00794                | YES             | YES   |
| 13   | a        | 43.29                   | 0.11897                | YES             | YES   |
| 14   | a        | 60.29                   | 1.05660                | YES             | YES   |
| 15   | a        | 63.49                   | 0.06219                | YES             | YES   |
| 16   | a        | 64.47                   | 0.19701                | YES             | YES   |
| 17   | a        | 66.55                   | 0.01455                | YES             | YES   |
| 18   | a        | 69.56                   | 0.08257                | YES             | YES   |
| 19   | a        | 75.54                   | 0.11595                | YES             | YES   |
| 20   | a        | 77.31                   | 0.22796                | YES             | YES   |
| 21   | a        | 79.96                   | 1.28430                | YES             | YES   |
| 22   | a        | 86.82                   | 0.63740                | YES             | YES   |
| 23   | a        | 91.82                   | 0.69710                | YES             | YES   |
| 24   | a        | 99.86                   | 0.19143                | YES             | YES   |
| 25   | a        | 106.89                  | 0.02967                | YES             | YES   |
| 26   | a        | 111.37                  | 1.05316                | YES             | YES   |
| 27   | a        | 135.01                  | 2.53377                | YES             | YES   |
| 28   | a        | 149.78                  | 3.04633                | YES             | YES   |
| 29   | a        | 155.61                  | 0.76361                | YES             | YES   |
| 30   | a        | 156.76                  | 0.68852                | YES             | YES   |
| 31   | a        | 159.87                  | 0.10534                | YES             | YES   |
| 32   | a        | 162.98                  | 1.62117                | YES             | YES   |
| 33   | a        | 166.59                  | 0.62736                | YES             | YES   |
| 34   | a        | 186.06                  | 5.84518                | YES             | YES   |
| 35   | a        | 189.37                  | 15.42632               | YES             | YES   |
| 36   | a        | 203.07                  | 88.02604               | YES             | YES   |
| 37   | a        | 216.66                  | 0.01407                | YES             | YES   |
| 38   | a        | 262.77                  | 1.69903                | YES             | YES   |
| 39   | a        | 269.61                  | 1.36239                | YES             | YES   |
| 40   | a        | 272.68                  | 4.40420                | YES             | YES   |
| 41   | a        | 281.68                  | 4.46958                | YES             | YES   |
| 42   | a        | 285.65                  | 0.33372                | YES             | YES   |
| 43   | a        | 286.84                  | 9.47569                | YES             | YES   |
| 44   | a        | 288.23                  | 1.52253                | YES             | YES   |

|    |   |        |           |     |     |
|----|---|--------|-----------|-----|-----|
| 45 | a | 297.41 | 0.45117   | YES | YES |
| 46 | a | 300.02 | 15.63770  | YES | YES |
| 47 | a | 303.93 | 22.84447  | YES | YES |
| 48 | a | 308.21 | 7.19096   | YES | YES |
| 49 | a | 313.75 | 0.58299   | YES | YES |
| 50 | a | 316.24 | 1.70143   | YES | YES |
| 51 | a | 318.46 | 6.48519   | YES | YES |
| 52 | a | 323.62 | 3.62754   | YES | YES |
| 53 | a | 326.68 | 0.12902   | YES | YES |
| 54 | a | 335.97 | 4.69452   | YES | YES |
| 55 | a | 339.29 | 6.19669   | YES | YES |
| 56 | a | 346.83 | 6.92827   | YES | YES |
| 57 | a | 354.20 | 7.50642   | YES | YES |
| 58 | a | 369.82 | 3.00604   | YES | YES |
| 59 | a | 374.20 | 15.71110  | YES | YES |
| 60 | a | 400.43 | 39.16739  | YES | YES |
| 61 | a | 438.76 | 27.40306  | YES | YES |
| 62 | a | 470.39 | 2.16195   | YES | YES |
| 63 | a | 478.35 | 1.18688   | YES | YES |
| 64 | a | 502.49 | 4.80907   | YES | YES |
| 65 | a | 506.19 | 9.41010   | YES | YES |
| 66 | a | 517.24 | 4.16070   | YES | YES |
| 67 | a | 517.89 | 4.89544   | YES | YES |
| 68 | a | 518.66 | 7.74224   | YES | YES |
| 69 | a | 521.56 | 5.03377   | YES | YES |
| 70 | a | 522.63 | 4.04887   | YES | YES |
| 71 | a | 523.10 | 0.64996   | YES | YES |
| 72 | a | 523.91 | 2.22491   | YES | YES |
| 73 | a | 533.23 | 0.44622   | YES | YES |
| 74 | a | 549.94 | 2.44190   | YES | YES |
| 75 | a | 550.93 | 1.76472   | YES | YES |
| 76 | a | 551.45 | 1.17453   | YES | YES |
| 77 | a | 552.00 | 0.67722   | YES | YES |
| 78 | a | 554.62 | 0.54252   | YES | YES |
| 79 | a | 557.31 | 0.59010   | YES | YES |
| 80 | a | 588.08 | 45.96212  | YES | YES |
| 81 | a | 600.08 | 31.02718  | YES | YES |
| 82 | a | 695.99 | 30.62335  | YES | YES |
| 83 | a | 698.90 | 36.06275  | YES | YES |
| 84 | a | 707.99 | 26.79940  | YES | YES |
| 85 | a | 708.57 | 33.04617  | YES | YES |
| 86 | a | 709.94 | 10.65241  | YES | YES |
| 87 | a | 710.67 | 51.91885  | YES | YES |
| 88 | a | 714.41 | 15.43531  | YES | YES |
| 89 | a | 733.01 | 6.35216   | YES | YES |
| 90 | a | 740.49 | 1.46777   | YES | YES |
| 91 | a | 775.89 | 3.59208   | YES | YES |
| 92 | a | 842.04 | 44.12147  | YES | YES |
| 93 | a | 884.63 | 25.85356  | YES | YES |
| 94 | a | 896.78 | 197.61231 | YES | YES |
| 95 | a | 909.80 | 265.41453 | YES | YES |
| 96 | a | 963.02 | 63.89741  | YES | YES |
| 97 | a | 966.69 | 149.65345 | YES | YES |
| 98 | a | 971.44 | 125.27107 | YES | YES |
| 99 | a | 972.85 | 254.16031 | YES | YES |

|     |   |         |           |     |     |
|-----|---|---------|-----------|-----|-----|
| 100 | a | 1035.94 | 35.83706  | YES | YES |
| 101 | a | 1040.79 | 57.54039  | YES | YES |
| 102 | a | 1106.22 | 1.48454   | YES | YES |
| 103 | a | 1140.79 | 5.98620   | YES | YES |
| 104 | a | 1143.08 | 29.38634  | YES | YES |
| 105 | a | 1156.50 | 17.47458  | YES | YES |
| 106 | a | 1164.52 | 13.66258  | YES | YES |
| 107 | a | 1164.90 | 41.31380  | YES | YES |
| 108 | a | 1170.36 | 23.79844  | YES | YES |
| 109 | a | 1177.34 | 289.85908 | YES | YES |
| 110 | a | 1182.65 | 68.77437  | YES | YES |
| 111 | a | 1187.19 | 15.55794  | YES | YES |
| 112 | a | 1202.91 | 19.00765  | YES | YES |
| 113 | a | 1206.69 | 103.81777 | YES | YES |
| 114 | a | 1208.97 | 100.24123 | YES | YES |
| 115 | a | 1217.35 | 35.78669  | YES | YES |
| 116 | a | 1222.20 | 641.14265 | YES | YES |
| 117 | a | 1224.16 | 319.43051 | YES | YES |
| 118 | a | 1226.02 | 657.28022 | YES | YES |
| 119 | a | 1228.42 | 519.07935 | YES | YES |
| 120 | a | 1248.14 | 179.33566 | YES | YES |
| 121 | a | 1256.38 | 202.08105 | YES | YES |
| 122 | a | 1262.55 | 481.28262 | YES | YES |
| 123 | a | 1270.73 | 775.47830 | YES | YES |
| 124 | a | 1273.30 | 260.12141 | YES | YES |
| 125 | a | 1291.04 | 929.10954 | YES | YES |
| 126 | a | 1298.94 | 189.41464 | YES | YES |
| 127 | a | 1305.49 | 19.12762  | YES | YES |
| 128 | a | 1306.92 | 23.61437  | YES | YES |
| 129 | a | 1337.88 | 143.68836 | YES | YES |

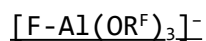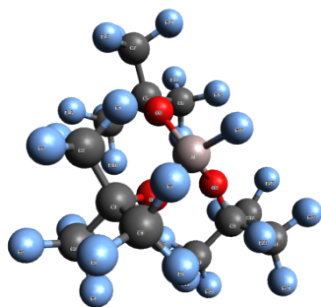

Atomic coordinates

|   |          |          |          |
|---|----------|----------|----------|
| O | 0.44082  | -0.46646 | -1.39941 |
| C | 1.12091  | -1.36165 | -2.14177 |
| C | 0.20130  | -2.62441 | -2.34283 |
| F | -0.77825 | -2.36914 | -3.23744 |
| F | 0.89347  | -3.70043 | -2.79768 |
| F | -0.38235 | -2.96841 | -1.18639 |
| C | 2.45805  | -1.80797 | -1.43814 |
| F | 3.10152  | -0.73392 | -0.94674 |
| F | 2.20640  | -2.64278 | -0.41034 |
| F | 3.30531  | -2.44424 | -2.28472 |

|    |          |          |          |
|----|----------|----------|----------|
| C  | 1.46187  | -0.73722 | -3.54903 |
| F  | 2.49749  | 0.12452  | -3.45141 |
| F  | 1.79939  | -1.67717 | -4.46917 |
| F  | 0.40972  | -0.05539 | -4.02543 |
| O  | 1.34859  | 0.13100  | 1.26947  |
| C  | 1.14709  | -0.18196 | 2.56180  |
| C  | 0.25997  | 0.89640  | 3.30301  |
| F  | -1.05309 | 0.68890  | 3.08358  |
| F  | 0.44838  | 0.88063  | 4.64847  |
| F  | 0.56619  | 2.12658  | 2.86047  |
| C  | 2.55982  | -0.24305 | 3.25667  |
| F  | 3.43985  | -0.89430 | 2.48138  |
| F  | 3.04129  | 1.00434  | 3.45913  |
| F  | 2.52661  | -0.86897 | 4.46001  |
| C  | 0.44787  | -1.58850 | 2.68098  |
| F  | 1.31746  | -2.58378 | 2.40084  |
| F  | -0.04284 | -1.81954 | 3.92549  |
| F  | -0.56838 | -1.67884 | 1.81024  |
| O  | -1.00707 | 1.33352  | 0.21885  |
| C  | -2.18317 | 1.64696  | -0.36150 |
| C  | -2.93725 | 0.34676  | -0.84907 |
| F  | -2.79388 | -0.63727 | 0.04983  |
| F  | -4.26857 | 0.56124  | -1.02330 |
| F  | -2.44634 | -0.09124 | -2.02567 |
| C  | -1.97621 | 2.60857  | -1.59096 |
| F  | -1.64387 | 3.85091  | -1.17902 |
| F  | -0.97555 | 2.15729  | -2.36765 |
| F  | -3.08426 | 2.71692  | -2.36422 |
| C  | -3.06708 | 2.37696  | 0.71886  |
| F  | -2.33765 | 3.27782  | 1.39378  |
| F  | -4.12438 | 3.02859  | 0.17041  |
| F  | -3.55836 | 1.49306  | 1.61416  |
| F  | 1.59146  | 2.10716  | -0.72932 |
| Al | 0.63772  | 0.81850  | -0.19620 |

### Vibrational analysis

| mode | symmetry | wave number<br>cm**(-1) | IR intensity<br>km/mol | selection rules |       |
|------|----------|-------------------------|------------------------|-----------------|-------|
|      |          |                         |                        | IR              | RAMAN |
| 1    |          | -0.00                   | 0.00000                | -               | -     |
| 2    |          | -0.00                   | 0.00000                | -               | -     |
| 3    |          | -0.00                   | 0.00000                | -               | -     |
| 4    |          | 0.00                    | 0.00000                | -               | -     |
| 5    |          | 0.00                    | 0.00000                | -               | -     |
| 6    |          | 0.00                    | 0.00000                | -               | -     |
| 7    | a        | 10.11                   | 0.05188                | YES             | YES   |
| 8    | a        | 11.87                   | 0.01513                | YES             | YES   |
| 9    | a        | 13.87                   | 0.00826                | YES             | YES   |
| 10   | a        | 17.15                   | 0.01773                | YES             | YES   |
| 11   | a        | 23.78                   | 0.24360                | YES             | YES   |
| 12   | a        | 26.18                   | 0.03809                | YES             | YES   |
| 13   | a        | 31.68                   | 0.07018                | YES             | YES   |
| 14   | a        | 44.14                   | 0.03883                | YES             | YES   |
| 15   | a        | 57.02                   | 0.11397                | YES             | YES   |
| 16   | a        | 63.74                   | 0.02799                | YES             | YES   |

|    |   |        |          |     |     |
|----|---|--------|----------|-----|-----|
| 17 | a | 66.28  | 0.25133  | YES | YES |
| 18 | a | 67.78  | 0.07023  | YES | YES |
| 19 | a | 70.30  | 0.01740  | YES | YES |
| 20 | a | 72.68  | 0.13673  | YES | YES |
| 21 | a | 75.70  | 0.12235  | YES | YES |
| 22 | a | 80.71  | 0.03444  | YES | YES |
| 23 | a | 82.22  | 0.01401  | YES | YES |
| 24 | a | 84.01  | 0.20217  | YES | YES |
| 25 | a | 88.93  | 0.38712  | YES | YES |
| 26 | a | 92.54  | 0.24913  | YES | YES |
| 27 | a | 99.00  | 0.37325  | YES | YES |
| 28 | a | 136.39 | 1.37007  | YES | YES |
| 29 | a | 140.94 | 0.63843  | YES | YES |
| 30 | a | 148.93 | 0.30736  | YES | YES |
| 31 | a | 156.50 | 0.27719  | YES | YES |
| 32 | a | 157.68 | 0.19378  | YES | YES |
| 33 | a | 161.63 | 0.22148  | YES | YES |
| 34 | a | 166.35 | 1.84618  | YES | YES |
| 35 | a | 167.99 | 0.92914  | YES | YES |
| 36 | a | 186.74 | 1.21944  | YES | YES |
| 37 | a | 195.27 | 7.14382  | YES | YES |
| 38 | a | 200.19 | 6.75326  | YES | YES |
| 39 | a | 236.65 | 0.27237  | YES | YES |
| 40 | a | 262.22 | 1.68075  | YES | YES |
| 41 | a | 270.75 | 0.53623  | YES | YES |
| 42 | a | 275.32 | 3.35599  | YES | YES |
| 43 | a | 277.62 | 4.34264  | YES | YES |
| 44 | a | 280.45 | 3.96430  | YES | YES |
| 45 | a | 283.51 | 0.18532  | YES | YES |
| 46 | a | 283.87 | 0.09570  | YES | YES |
| 47 | a | 284.34 | 0.14518  | YES | YES |
| 48 | a | 289.26 | 3.93202  | YES | YES |
| 49 | a | 303.66 | 9.82295  | YES | YES |
| 50 | a | 304.62 | 9.97936  | YES | YES |
| 51 | a | 308.69 | 0.14747  | YES | YES |
| 52 | a | 314.53 | 0.22511  | YES | YES |
| 53 | a | 317.76 | 0.68170  | YES | YES |
| 54 | a | 319.56 | 1.30904  | YES | YES |
| 55 | a | 321.83 | 2.86866  | YES | YES |
| 56 | a | 322.95 | 2.69760  | YES | YES |
| 57 | a | 327.49 | 0.17329  | YES | YES |
| 58 | a | 343.17 | 0.83189  | YES | YES |
| 59 | a | 353.25 | 4.65556  | YES | YES |
| 60 | a | 356.38 | 9.43498  | YES | YES |
| 61 | a | 363.84 | 28.97129 | YES | YES |
| 62 | a | 369.37 | 26.55365 | YES | YES |
| 63 | a | 407.56 | 10.86083 | YES | YES |
| 64 | a | 449.09 | 65.33209 | YES | YES |
| 65 | a | 452.31 | 56.09370 | YES | YES |
| 66 | a | 515.91 | 0.38248  | YES | YES |
| 67 | a | 516.61 | 4.01766  | YES | YES |
| 68 | a | 517.28 | 5.37347  | YES | YES |
| 69 | a | 517.65 | 4.78778  | YES | YES |
| 70 | a | 519.16 | 4.90209  | YES | YES |
| 71 | a | 519.41 | 5.58407  | YES | YES |

|     |   |         |            |     |     |
|-----|---|---------|------------|-----|-----|
| 72  | a | 519.67  | 5.84670    | YES | YES |
| 73  | a | 522.97  | 1.92894    | YES | YES |
| 74  | a | 523.19  | 2.62390    | YES | YES |
| 75  | a | 526.87  | 0.19124    | YES | YES |
| 76  | a | 547.60  | 20.50946   | YES | YES |
| 77  | a | 549.04  | 20.76864   | YES | YES |
| 78  | a | 551.87  | 1.37550    | YES | YES |
| 79  | a | 553.00  | 0.33981    | YES | YES |
| 80  | a | 553.06  | 0.60566    | YES | YES |
| 81  | a | 554.52  | 0.16412    | YES | YES |
| 82  | a | 556.88  | 24.16976   | YES | YES |
| 83  | a | 559.86  | 27.36268   | YES | YES |
| 84  | a | 705.31  | 4.39604    | YES | YES |
| 85  | a | 705.62  | 2.43967    | YES | YES |
| 86  | a | 706.03  | 9.54257    | YES | YES |
| 87  | a | 706.96  | 62.49001   | YES | YES |
| 88  | a | 707.77  | 59.75348   | YES | YES |
| 89  | a | 708.25  | 66.87308   | YES | YES |
| 90  | a | 716.98  | 5.09569    | YES | YES |
| 91  | a | 734.21  | 6.69308    | YES | YES |
| 92  | a | 734.62  | 6.34880    | YES | YES |
| 93  | a | 760.18  | 11.91838   | YES | YES |
| 94  | a | 811.65  | 31.94216   | YES | YES |
| 95  | a | 817.21  | 32.46202   | YES | YES |
| 96  | a | 849.91  | 57.29140   | YES | YES |
| 97  | a | 953.43  | 31.73135   | YES | YES |
| 98  | a | 955.22  | 44.61639   | YES | YES |
| 99  | a | 958.18  | 55.46450   | YES | YES |
| 100 | a | 959.95  | 239.22036  | YES | YES |
| 101 | a | 963.94  | 297.27867  | YES | YES |
| 102 | a | 964.32  | 208.24046  | YES | YES |
| 103 | a | 1103.99 | 11.24707   | YES | YES |
| 104 | a | 1105.45 | 10.36676   | YES | YES |
| 105 | a | 1110.91 | 3.16486    | YES | YES |
| 106 | a | 1124.61 | 3.75704    | YES | YES |
| 107 | a | 1127.05 | 25.82396   | YES | YES |
| 108 | a | 1129.38 | 2.92069    | YES | YES |
| 109 | a | 1130.88 | 12.78537   | YES | YES |
| 110 | a | 1132.87 | 28.97947   | YES | YES |
| 111 | a | 1135.04 | 13.96048   | YES | YES |
| 112 | a | 1190.74 | 11.99196   | YES | YES |
| 113 | a | 1193.97 | 25.58747   | YES | YES |
| 114 | a | 1195.76 | 40.85179   | YES | YES |
| 115 | a | 1201.16 | 39.65866   | YES | YES |
| 116 | a | 1204.42 | 10.38482   | YES | YES |
| 117 | a | 1206.26 | 38.16633   | YES | YES |
| 118 | a | 1214.16 | 886.79886  | YES | YES |
| 119 | a | 1216.15 | 1152.43123 | YES | YES |
| 120 | a | 1227.50 | 452.42724  | YES | YES |
| 121 | a | 1228.70 | 297.45653  | YES | YES |
| 122 | a | 1232.78 | 66.79091   | YES | YES |
| 123 | a | 1234.75 | 158.19286  | YES | YES |
| 124 | a | 1240.55 | 100.89622  | YES | YES |
| 125 | a | 1244.44 | 82.61423   | YES | YES |
| 126 | a | 1248.82 | 400.00465  | YES | YES |

|     |   |         |           |     |     |
|-----|---|---------|-----------|-----|-----|
| 127 | a | 1253.51 | 492.20381 | YES | YES |
| 128 | a | 1255.56 | 595.02304 | YES | YES |
| 129 | a | 1262.07 | 786.56683 | YES | YES |
| 130 | a | 1334.22 | 227.39354 | YES | YES |
| 131 | a | 1340.54 | 270.74734 | YES | YES |
| 132 | a | 1359.42 | 92.79016  | YES | YES |

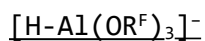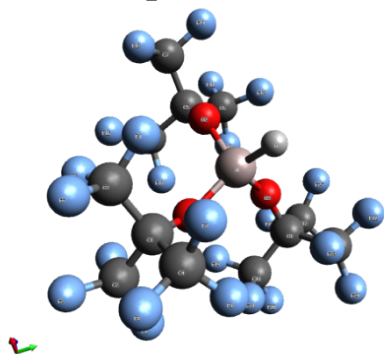

Atomic coordinates

|   |          |          |          |
|---|----------|----------|----------|
| O | 0.46781  | -0.62916 | -1.21177 |
| C | 1.08292  | -1.47444 | -2.05951 |
| C | 0.15009  | -2.72935 | -2.25184 |
| F | -0.90148 | -2.42880 | -3.04508 |
| F | 0.80201  | -3.77521 | -2.82420 |
| F | -0.33396 | -3.14289 | -1.07303 |
| C | 2.47164  | -1.95188 | -1.48587 |
| F | 3.14682  | -0.90472 | -0.97700 |
| F | 2.30138  | -2.84824 | -0.49287 |
| F | 3.25816  | -2.53098 | -2.42747 |
| C | 1.31949  | -0.78945 | -3.46161 |
| F | 2.37087  | 0.05918  | -3.40810 |
| F | 1.57338  | -1.68722 | -4.44785 |
| F | 0.24240  | -0.07637 | -3.82359 |
| O | 1.41856  | 0.40180  | 1.34380  |
| C | 1.17001  | -0.05719 | 2.58458  |
| C | 0.21337  | 0.91800  | 3.38094  |
| F | -1.07923 | 0.70205  | 3.06616  |
| F | 0.32776  | 0.76740  | 4.72744  |
| F | 0.50401  | 2.19514  | 3.08754  |
| C | 2.55157  | -0.13986 | 3.33783  |
| F | 3.48860  | -0.68697 | 2.54816  |
| F | 2.98062  | 1.09721  | 3.67930  |
| F | 2.48908  | -0.87655 | 4.47545  |
| C | 0.51778  | -1.49088 | 2.55023  |
| F | 1.43318  | -2.42656 | 2.21605  |
| F | -0.00659 | -1.84981 | 3.75063  |
| F | -0.46483 | -1.53736 | 1.63975  |
| O | -0.94091 | 1.40467  | 0.14084  |
| C | -2.13585 | 1.68326  | -0.41374 |
| C | -2.80433 | 0.39367  | -1.03612 |
| F | -2.61622 | -0.66415 | -0.23678 |
| F | -4.14442 | 0.54693  | -1.21437 |
| F | -2.27346 | 0.10634  | -2.24213 |

|    |          |         |          |
|----|----------|---------|----------|
| C  | -1.99099 | 2.77431 | -1.54145 |
| F  | -1.73732 | 3.98831 | -1.00339 |
| F  | -0.96137 | 2.47198 | -2.35380 |
| F  | -3.10111 | 2.89355 | -2.31002 |
| C  | -3.07447 | 2.24413 | 0.72173  |
| F  | -2.41139 | 3.11897 | 1.49287  |
| F  | -4.16839 | 2.87927 | 0.22625  |
| F  | -3.51496 | 1.24588 | 1.51727  |
| H  | 1.66037  | 1.95332 | -0.90986 |
| Al | 0.71940  | 0.85266 | -0.23536 |

### Vibrational analysis

| mode | symmetry | wave number<br>cm**(-1) | IR intensity<br>km/mol | selection rules |       |
|------|----------|-------------------------|------------------------|-----------------|-------|
|      |          |                         |                        | IR              | RAMAN |
| 1    |          | -0.00                   | 0.00000                | -               | -     |
| 2    |          | -0.00                   | 0.00000                | -               | -     |
| 3    |          | -0.00                   | 0.00000                | -               | -     |
| 4    |          | -0.00                   | 0.00000                | -               | -     |
| 5    |          | -0.00                   | 0.00000                | -               | -     |
| 6    |          | -0.00                   | 0.00000                | -               | -     |
| 7    | a        | 10.75                   | 0.01535                | YES             | YES   |
| 8    | a        | 11.13                   | 0.01199                | YES             | YES   |
| 9    | a        | 16.70                   | 0.00428                | YES             | YES   |
| 10   | a        | 24.79                   | 0.05444                | YES             | YES   |
| 11   | a        | 29.36                   | 0.09406                | YES             | YES   |
| 12   | a        | 32.04                   | 0.13548                | YES             | YES   |
| 13   | a        | 34.07                   | 0.09546                | YES             | YES   |
| 14   | a        | 47.33                   | 0.07381                | YES             | YES   |
| 15   | a        | 57.02                   | 0.08341                | YES             | YES   |
| 16   | a        | 63.83                   | 0.15017                | YES             | YES   |
| 17   | a        | 65.22                   | 0.05367                | YES             | YES   |
| 18   | a        | 67.54                   | 0.06569                | YES             | YES   |
| 19   | a        | 68.49                   | 0.00270                | YES             | YES   |
| 20   | a        | 72.17                   | 0.17301                | YES             | YES   |
| 21   | a        | 73.56                   | 0.08588                | YES             | YES   |
| 22   | a        | 80.63                   | 0.04344                | YES             | YES   |
| 23   | a        | 81.95                   | 0.07806                | YES             | YES   |
| 24   | a        | 83.95                   | 0.00826                | YES             | YES   |
| 25   | a        | 87.64                   | 0.15103                | YES             | YES   |
| 26   | a        | 90.88                   | 0.39348                | YES             | YES   |
| 27   | a        | 99.28                   | 0.50768                | YES             | YES   |
| 28   | a        | 151.26                  | 0.10530                | YES             | YES   |
| 29   | a        | 152.77                  | 0.07311                | YES             | YES   |
| 30   | a        | 155.08                  | 0.04232                | YES             | YES   |
| 31   | a        | 158.55                  | 0.31958                | YES             | YES   |
| 32   | a        | 159.93                  | 0.71014                | YES             | YES   |
| 33   | a        | 161.18                  | 0.30648                | YES             | YES   |
| 34   | a        | 182.93                  | 2.73960                | YES             | YES   |
| 35   | a        | 187.32                  | 1.97720                | YES             | YES   |
| 36   | a        | 194.42                  | 0.36851                | YES             | YES   |
| 37   | a        | 245.97                  | 0.22955                | YES             | YES   |
| 38   | a        | 256.96                  | 0.48838                | YES             | YES   |
| 39   | a        | 259.36                  | 0.97983                | YES             | YES   |
| 40   | a        | 272.36                  | 2.94741                | YES             | YES   |



|    |   |        |           |     |     |
|----|---|--------|-----------|-----|-----|
| 41 | a | 274.83 | 1.89406   | YES | YES |
| 42 | a | 277.66 | 3.04386   | YES | YES |
| 43 | a | 283.55 | 0.17473   | YES | YES |
| 44 | a | 283.87 | 0.06484   | YES | YES |
| 45 | a | 284.16 | 0.05268   | YES | YES |
| 46 | a | 297.59 | 5.48984   | YES | YES |
| 47 | a | 301.39 | 7.12160   | YES | YES |
| 48 | a | 301.58 | 7.99770   | YES | YES |
| 49 | a | 308.13 | 0.25794   | YES | YES |
| 50 | a | 309.63 | 0.47057   | YES | YES |
| 51 | a | 312.29 | 0.08739   | YES | YES |
| 52 | a | 317.53 | 0.97029   | YES | YES |
| 53 | a | 319.47 | 0.74262   | YES | YES |
| 54 | a | 322.21 | 1.74962   | YES | YES |
| 55 | a | 330.06 | 1.21296   | YES | YES |
| 56 | a | 334.55 | 0.62243   | YES | YES |
| 57 | a | 341.88 | 1.39487   | YES | YES |
| 58 | a | 347.87 | 6.72344   | YES | YES |
| 59 | a | 355.56 | 7.69104   | YES | YES |
| 60 | a | 364.26 | 11.24481  | YES | YES |
| 61 | a | 403.78 | 13.44849  | YES | YES |
| 62 | a | 438.36 | 26.03518  | YES | YES |
| 63 | a | 441.35 | 35.17300  | YES | YES |
| 64 | a | 516.50 | 0.64381   | YES | YES |
| 65 | a | 516.66 | 5.26041   | YES | YES |
| 66 | a | 517.27 | 5.54456   | YES | YES |
| 67 | a | 518.14 | 2.63900   | YES | YES |
| 68 | a | 518.72 | 10.71504  | YES | YES |
| 69 | a | 519.20 | 0.88506   | YES | YES |
| 70 | a | 520.48 | 4.30825   | YES | YES |
| 71 | a | 522.43 | 1.22833   | YES | YES |
| 72 | a | 522.53 | 2.13104   | YES | YES |
| 73 | a | 528.74 | 2.54697   | YES | YES |
| 74 | a | 537.38 | 5.15934   | YES | YES |
| 75 | a | 539.95 | 5.94036   | YES | YES |
| 76 | a | 551.84 | 0.21444   | YES | YES |
| 77 | a | 552.05 | 0.72393   | YES | YES |
| 78 | a | 552.95 | 0.36429   | YES | YES |
| 79 | a | 554.08 | 1.07612   | YES | YES |
| 80 | a | 554.23 | 2.05885   | YES | YES |
| 81 | a | 554.99 | 2.37992   | YES | YES |
| 82 | a | 656.54 | 243.67256 | YES | YES |
| 83 | a | 677.73 | 196.37891 | YES | YES |
| 84 | a | 705.12 | 8.38145   | YES | YES |
| 85 | a | 705.60 | 4.51095   | YES | YES |
| 86 | a | 706.62 | 18.00378  | YES | YES |
| 87 | a | 707.27 | 87.13427  | YES | YES |
| 88 | a | 708.09 | 68.22597  | YES | YES |
| 89 | a | 708.47 | 62.63864  | YES | YES |
| 90 | a | 724.43 | 1.03745   | YES | YES |
| 91 | a | 732.27 | 20.53342  | YES | YES |
| 92 | a | 733.09 | 20.61998  | YES | YES |
| 93 | a | 775.94 | 2.11345   | YES | YES |
| 94 | a | 795.05 | 39.58847  | YES | YES |
| 95 | a | 801.09 | 34.82029  | YES | YES |

|     |   |         |            |     |     |
|-----|---|---------|------------|-----|-----|
| 96  | a | 951.63  | 30.14316   | YES | YES |
| 97  | a | 953.50  | 44.88816   | YES | YES |
| 98  | a | 957.43  | 183.68125  | YES | YES |
| 99  | a | 959.30  | 116.88847  | YES | YES |
| 100 | a | 962.51  | 178.76915  | YES | YES |
| 101 | a | 963.50  | 311.78297  | YES | YES |
| 102 | a | 1102.24 | 12.37235   | YES | YES |
| 103 | a | 1104.06 | 14.02876   | YES | YES |
| 104 | a | 1108.90 | 4.07879    | YES | YES |
| 105 | a | 1120.98 | 5.35831    | YES | YES |
| 106 | a | 1124.57 | 35.45643   | YES | YES |
| 107 | a | 1127.51 | 1.42160    | YES | YES |
| 108 | a | 1128.52 | 7.13866    | YES | YES |
| 109 | a | 1130.95 | 35.34591   | YES | YES |
| 110 | a | 1133.41 | 12.81682   | YES | YES |
| 111 | a | 1189.18 | 17.33315   | YES | YES |
| 112 | a | 1193.97 | 18.82649   | YES | YES |
| 113 | a | 1194.99 | 73.63362   | YES | YES |
| 114 | a | 1198.63 | 19.09107   | YES | YES |
| 115 | a | 1203.13 | 14.88523   | YES | YES |
| 116 | a | 1206.45 | 49.91127   | YES | YES |
| 117 | a | 1212.83 | 894.32629  | YES | YES |
| 118 | a | 1213.43 | 1128.26919 | YES | YES |
| 119 | a | 1226.14 | 375.16996  | YES | YES |
| 120 | a | 1228.12 | 313.40371  | YES | YES |
| 121 | a | 1231.17 | 22.79628   | YES | YES |
| 122 | a | 1233.51 | 273.69972  | YES | YES |
| 123 | a | 1240.17 | 89.81242   | YES | YES |
| 124 | a | 1241.70 | 73.69692   | YES | YES |
| 125 | a | 1247.41 | 441.10575  | YES | YES |
| 126 | a | 1251.96 | 569.71050  | YES | YES |
| 127 | a | 1255.11 | 486.94669  | YES | YES |
| 128 | a | 1262.02 | 721.85106  | YES | YES |
| 129 | a | 1331.24 | 223.02646  | YES | YES |
| 130 | a | 1332.01 | 272.32132  | YES | YES |
| 131 | a | 1348.17 | 72.62193   | YES | YES |
| 132 | a | 1903.33 | 216.97770  | YES | YES |

oDFB·AlOR<sub>3</sub>

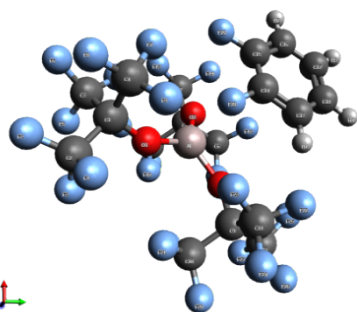

Atomic coordinates

|   |          |          |          |
|---|----------|----------|----------|
| O | -0.42583 | -1.88011 | -0.92437 |
| C | 0.09429  | -2.98119 | -1.53943 |
| C | -1.09763 | -3.96512 | -1.83189 |

|    |          |          |          |
|----|----------|----------|----------|
| F  | -1.84683 | -3.50738 | -2.85273 |
| F  | -0.65066 | -5.19571 | -2.15536 |
| F  | -1.88560 | -4.06686 | -0.75234 |
| C  | 1.14566  | -3.67866 | -0.60000 |
| F  | 1.95367  | -2.74338 | -0.05847 |
| F  | 0.52837  | -4.31442 | 0.41346  |
| F  | 1.90904  | -4.56696 | -1.25907 |
| C  | 0.78396  | -2.55104 | -2.88547 |
| F  | 1.95725  | -1.92916 | -2.62477 |
| F  | 1.03156  | -3.59895 | -3.68940 |
| F  | 0.00599  | -1.67770 | -3.54606 |
| O  | 1.13281  | -0.02870 | 0.96698  |
| C  | 1.25161  | -0.05303 | 2.32839  |
| C  | 0.66714  | 1.28022  | 2.92958  |
| F  | -0.68244 | 1.25060  | 2.88585  |
| F  | 1.04409  | 1.47196  | 4.20692  |
| F  | 1.07647  | 2.33027  | 2.20021  |
| C  | 2.77602  | -0.18025 | 2.67647  |
| F  | 3.35049  | -1.12982 | 1.92996  |
| F  | 3.40945  | 0.98552  | 2.42481  |
| F  | 2.95439  | -0.48468 | 3.97839  |
| C  | 0.45937  | -1.28754 | 2.89985  |
| F  | 1.16492  | -2.42141 | 2.81976  |
| F  | 0.04444  | -1.12626 | 4.15873  |
| F  | -0.65603 | -1.45906 | 2.10741  |
| O  | -1.55436 | 0.64025  | 0.04534  |
| C  | -2.85704 | 0.83206  | -0.31114 |
| C  | -3.72061 | -0.44537 | 0.01438  |
| F  | -3.34789 | -0.95699 | 1.19961  |
| F  | -5.03567 | -0.16570 | 0.06159  |
| F  | -3.52476 | -1.39598 | -0.92232 |
| C  | -2.95129 | 1.14605  | -1.84966 |
| F  | -2.51288 | 2.40413  | -2.10789 |
| F  | -2.15856 | 0.30305  | -2.53798 |
| F  | -4.20286 | 1.04051  | -2.32070 |
| C  | -3.38770 | 2.05759  | 0.52028  |
| F  | -2.47392 | 3.04588  | 0.52131  |
| F  | -4.53639 | 2.54541  | 0.01260  |
| F  | -3.60564 | 1.69944  | 1.79832  |
| Al | -0.18649 | -0.39713 | -0.10923 |
| C  | 0.66338  | 3.02498  | -0.99144 |
| H  | -0.41268 | 3.01894  | -1.20930 |
| C  | 1.40527  | 1.86051  | -1.11490 |
| F  | 0.74997  | 0.67041  | -1.51301 |
| C  | 2.76723  | 1.76640  | -0.81285 |
| F  | 3.40274  | 0.59923  | -0.93036 |
| C  | 3.42672  | 2.91964  | -0.37492 |
| H  | 4.49588  | 2.84921  | -0.12387 |
| C  | 2.70936  | 4.12175  | -0.25007 |
| H  | 3.23222  | 5.02515  | 0.10064  |
| C  | 1.33953  | 4.17901  | -0.55645 |
| H  | 0.78045  | 5.12042  | -0.44540 |

Vibrational analysis

| mode | symmetry | wave number<br>cm**(-1) | IR intensity<br>km/mol | selection rules |       |
|------|----------|-------------------------|------------------------|-----------------|-------|
|      |          |                         |                        | IR              | RAMAN |
| 1    |          | -0.00                   | 0.00000                | -               | -     |
| 2    |          | -0.00                   | 0.00000                | -               | -     |
| 3    |          | -0.00                   | 0.00000                | -               | -     |
| 4    |          | 0.00                    | 0.00000                | -               | -     |
| 5    |          | 0.00                    | 0.00000                | -               | -     |
| 6    |          | 0.00                    | 0.00000                | -               | -     |
| 7    | a        | 6.11                    | 0.01127                | YES             | YES   |
| 8    | a        | 14.71                   | 0.04418                | YES             | YES   |
| 9    | a        | 21.14                   | 0.07461                | YES             | YES   |
| 10   | a        | 21.82                   | 0.18145                | YES             | YES   |
| 11   | a        | 25.59                   | 0.27390                | YES             | YES   |
| 12   | a        | 29.45                   | 0.18221                | YES             | YES   |
| 13   | a        | 36.52                   | 0.93755                | YES             | YES   |
| 14   | a        | 42.33                   | 0.18201                | YES             | YES   |
| 15   | a        | 43.34                   | 0.39333                | YES             | YES   |
| 16   | a        | 48.43                   | 0.78822                | YES             | YES   |
| 17   | a        | 51.93                   | 1.15275                | YES             | YES   |
| 18   | a        | 57.48                   | 1.82802                | YES             | YES   |
| 19   | a        | 58.53                   | 0.27203                | YES             | YES   |
| 20   | a        | 61.09                   | 0.58735                | YES             | YES   |
| 21   | a        | 66.24                   | 0.08951                | YES             | YES   |
| 22   | a        | 69.47                   | 0.17481                | YES             | YES   |
| 23   | a        | 72.08                   | 0.91269                | YES             | YES   |
| 24   | a        | 74.56                   | 0.09856                | YES             | YES   |
| 25   | a        | 75.11                   | 0.46664                | YES             | YES   |
| 26   | a        | 76.48                   | 0.01097                | YES             | YES   |
| 27   | a        | 82.59                   | 0.58673                | YES             | YES   |
| 28   | a        | 83.33                   | 0.79275                | YES             | YES   |
| 29   | a        | 84.06                   | 0.24020                | YES             | YES   |
| 30   | a        | 90.19                   | 1.88879                | YES             | YES   |
| 31   | a        | 94.89                   | 1.05046                | YES             | YES   |
| 32   | a        | 103.90                  | 4.53577                | YES             | YES   |
| 33   | a        | 128.44                  | 9.09449                | YES             | YES   |
| 34   | a        | 154.86                  | 3.56643                | YES             | YES   |
| 35   | a        | 156.88                  | 0.07703                | YES             | YES   |
| 36   | a        | 158.96                  | 0.49302                | YES             | YES   |
| 37   | a        | 162.19                  | 0.20739                | YES             | YES   |
| 38   | a        | 162.50                  | 1.56355                | YES             | YES   |
| 39   | a        | 165.75                  | 0.36775                | YES             | YES   |
| 40   | a        | 181.10                  | 10.91628               | YES             | YES   |
| 41   | a        | 187.22                  | 5.23202                | YES             | YES   |
| 42   | a        | 199.09                  | 12.59108               | YES             | YES   |
| 43   | a        | 228.67                  | 5.44222                | YES             | YES   |
| 44   | a        | 264.64                  | 6.12414                | YES             | YES   |
| 45   | a        | 270.09                  | 0.52944                | YES             | YES   |
| 46   | a        | 272.80                  | 1.51271                | YES             | YES   |
| 47   | a        | 277.77                  | 10.05341               | YES             | YES   |
| 48   | a        | 281.01                  | 4.47670                | YES             | YES   |
| 49   | a        | 282.46                  | 17.05138               | YES             | YES   |
| 50   | a        | 284.38                  | 1.13337                | YES             | YES   |
| 51   | a        | 285.66                  | 0.37267                | YES             | YES   |
| 52   | a        | 287.54                  | 6.12299                | YES             | YES   |
| 53   | a        | 292.08                  | 6.79915                | YES             | YES   |

|     |   |        |          |     |     |
|-----|---|--------|----------|-----|-----|
| 54  | a | 296.16 | 1.07013  | YES | YES |
| 55  | a | 308.30 | 6.51256  | YES | YES |
| 56  | a | 309.05 | 5.47678  | YES | YES |
| 57  | a | 313.02 | 0.63980  | YES | YES |
| 58  | a | 318.95 | 0.47435  | YES | YES |
| 59  | a | 319.33 | 0.84196  | YES | YES |
| 60  | a | 321.36 | 2.52984  | YES | YES |
| 61  | a | 321.50 | 2.32315  | YES | YES |
| 62  | a | 326.32 | 0.07021  | YES | YES |
| 63  | a | 335.46 | 2.28559  | YES | YES |
| 64  | a | 348.18 | 17.82160 | YES | YES |
| 65  | a | 351.77 | 3.87337  | YES | YES |
| 66  | a | 358.43 | 12.97798 | YES | YES |
| 67  | a | 360.08 | 17.97076 | YES | YES |
| 68  | a | 367.43 | 8.37521  | YES | YES |
| 69  | a | 373.04 | 42.12784 | YES | YES |
| 70  | a | 412.13 | 18.39749 | YES | YES |
| 71  | a | 433.65 | 3.98541  | YES | YES |
| 72  | a | 450.40 | 35.82061 | YES | YES |
| 73  | a | 455.88 | 9.32674  | YES | YES |
| 74  | a | 471.87 | 17.23065 | YES | YES |
| 75  | a | 513.05 | 4.79641  | YES | YES |
| 76  | a | 518.96 | 2.33490  | YES | YES |
| 77  | a | 519.70 | 1.69443  | YES | YES |
| 78  | a | 519.78 | 3.68620  | YES | YES |
| 79  | a | 520.31 | 3.73320  | YES | YES |
| 80  | a | 521.21 | 10.53861 | YES | YES |
| 81  | a | 521.37 | 3.01174  | YES | YES |
| 82  | a | 523.60 | 1.12985  | YES | YES |
| 83  | a | 524.65 | 1.38798  | YES | YES |
| 84  | a | 527.98 | 0.63080  | YES | YES |
| 85  | a | 532.50 | 7.54744  | YES | YES |
| 86  | a | 543.79 | 0.81257  | YES | YES |
| 87  | a | 552.54 | 0.74982  | YES | YES |
| 88  | a | 553.75 | 1.02451  | YES | YES |
| 89  | a | 554.65 | 0.56817  | YES | YES |
| 90  | a | 554.89 | 0.54445  | YES | YES |
| 91  | a | 556.03 | 0.29802  | YES | YES |
| 92  | a | 556.35 | 0.50348  | YES | YES |
| 93  | a | 559.60 | 14.49158 | YES | YES |
| 94  | a | 568.78 | 23.22919 | YES | YES |
| 95  | a | 586.73 | 37.58899 | YES | YES |
| 96  | a | 670.78 | 0.13125  | YES | YES |
| 97  | a | 705.73 | 15.99500 | YES | YES |
| 98  | a | 707.85 | 3.96991  | YES | YES |
| 99  | a | 708.80 | 59.53678 | YES | YES |
| 100 | a | 709.77 | 21.51395 | YES | YES |
| 101 | a | 710.50 | 20.75939 | YES | YES |
| 102 | a | 711.07 | 75.88343 | YES | YES |
| 103 | a | 727.17 | 1.51785  | YES | YES |
| 104 | a | 735.31 | 64.46517 | YES | YES |
| 105 | a | 740.04 | 3.29954  | YES | YES |
| 106 | a | 741.34 | 55.43215 | YES | YES |
| 107 | a | 742.46 | 25.20961 | YES | YES |
| 108 | a | 793.60 | 2.78133  | YES | YES |

|     |   |         |            |     |     |
|-----|---|---------|------------|-----|-----|
| 109 | a | 827.02  | 12.00464   | YES | YES |
| 110 | a | 831.49  | 3.15872    | YES | YES |
| 111 | a | 873.24  | 22.59766   | YES | YES |
| 112 | a | 899.43  | 24.25628   | YES | YES |
| 113 | a | 919.34  | 4.02050    | YES | YES |
| 114 | a | 952.13  | 98.50927   | YES | YES |
| 115 | a | 960.25  | 67.04056   | YES | YES |
| 116 | a | 963.84  | 3.72878    | YES | YES |
| 117 | a | 964.13  | 68.53033   | YES | YES |
| 118 | a | 967.38  | 160.25532  | YES | YES |
| 119 | a | 970.39  | 228.12225  | YES | YES |
| 120 | a | 971.27  | 231.27917  | YES | YES |
| 121 | a | 1026.16 | 8.35300    | YES | YES |
| 122 | a | 1069.60 | 56.31000   | YES | YES |
| 123 | a | 1086.42 | 25.65334   | YES | YES |
| 124 | a | 1101.52 | 9.69151    | YES | YES |
| 125 | a | 1109.01 | 1.62197    | YES | YES |
| 126 | a | 1123.92 | 30.23962   | YES | YES |
| 127 | a | 1138.84 | 9.82003    | YES | YES |
| 128 | a | 1140.52 | 25.88095   | YES | YES |
| 129 | a | 1154.32 | 12.80453   | YES | YES |
| 130 | a | 1159.63 | 29.66661   | YES | YES |
| 131 | a | 1163.69 | 4.85933    | YES | YES |
| 132 | a | 1166.89 | 1.01717    | YES | YES |
| 133 | a | 1170.90 | 4.52210    | YES | YES |
| 134 | a | 1178.15 | 43.81557   | YES | YES |
| 135 | a | 1188.71 | 17.97495   | YES | YES |
| 136 | a | 1191.96 | 11.91211   | YES | YES |
| 137 | a | 1194.84 | 14.65264   | YES | YES |
| 138 | a | 1202.40 | 1.48448    | YES | YES |
| 139 | a | 1205.67 | 139.42884  | YES | YES |
| 140 | a | 1209.10 | 92.31604   | YES | YES |
| 141 | a | 1213.65 | 22.18365   | YES | YES |
| 142 | a | 1222.49 | 60.33808   | YES | YES |
| 143 | a | 1234.41 | 1086.93650 | YES | YES |
| 144 | a | 1237.96 | 239.53590  | YES | YES |
| 145 | a | 1242.83 | 225.26914  | YES | YES |
| 146 | a | 1245.26 | 200.32079  | YES | YES |
| 147 | a | 1246.43 | 1064.20024 | YES | YES |
| 148 | a | 1252.76 | 279.68402  | YES | YES |
| 149 | a | 1256.49 | 546.97068  | YES | YES |
| 150 | a | 1261.33 | 1158.41754 | YES | YES |
| 151 | a | 1264.76 | 302.06305  | YES | YES |
| 152 | a | 1272.07 | 409.43403  | YES | YES |
| 153 | a | 1285.08 | 123.04506  | YES | YES |
| 154 | a | 1317.95 | 40.01856   | YES | YES |
| 155 | a | 1334.78 | 141.92433  | YES | YES |
| 156 | a | 1345.85 | 159.57202  | YES | YES |
| 157 | a | 1379.85 | 6.41352    | YES | YES |
| 158 | a | 1455.91 | 10.61101   | YES | YES |
| 159 | a | 1506.63 | 157.44247  | YES | YES |
| 160 | a | 1602.68 | 1.99213    | YES | YES |
| 161 | a | 1649.18 | 24.75118   | YES | YES |
| 162 | a | 3116.86 | 3.06963    | YES | YES |
| 163 | a | 3131.45 | 3.73491    | YES | YES |

|     |   |         |          |     |     |
|-----|---|---------|----------|-----|-----|
| 164 | a | 3138.28 | 0.24810  | YES | YES |
| 165 | a | 3164.27 | 17.53559 | YES | YES |

$[\mu F-\{Al(OR^F)_3\}_2]^-$

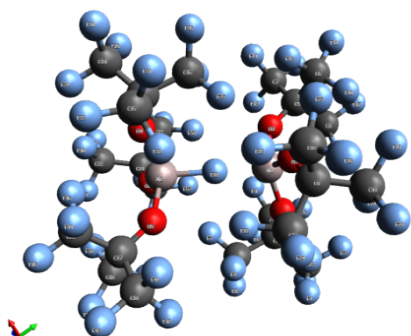

Atomic coordinates

|   |          |          |          |
|---|----------|----------|----------|
| O | -2.51851 | 1.21475  | -0.40729 |
| C | -3.54134 | 0.60541  | 0.24149  |
| C | -4.87112 | 0.95401  | -0.52084 |
| F | -4.96713 | 0.24793  | -1.66550 |
| F | -5.96428 | 0.67311  | 0.22825  |
| F | -4.90373 | 2.25596  | -0.83768 |
| C | -3.63466 | 1.12127  | 1.72637  |
| F | -2.39756 | 1.21505  | 2.24863  |
| F | -4.19071 | 2.34971  | 1.77359  |
| F | -4.36636 | 0.30633  | 2.51363  |
| C | -3.32431 | -0.95328 | 0.24080  |
| F | -2.37417 | -1.27795 | 1.14662  |
| F | -4.44739 | -1.63310 | 0.55195  |
| F | -2.90026 | -1.36092 | -0.96202 |
| O | -0.11370 | 2.62723  | 0.74500  |
| C | -0.00456 | 3.95096  | 1.03078  |
| C | 0.85879  | 4.69373  | -0.06030 |
| F | 0.13303  | 4.89209  | -1.18096 |
| F | 1.28954  | 5.90290  | 0.36906  |
| F | 1.93270  | 3.96374  | -0.38860 |
| C | 0.69818  | 4.07876  | 2.43199  |
| F | 0.16203  | 3.21926  | 3.30740  |
| F | 2.01403  | 3.80532  | 2.33193  |
| F | 0.57316  | 5.32888  | 2.94051  |
| C | -1.42801 | 4.62131  | 1.09797  |
| F | -2.06606 | 4.29168  | 2.23731  |
| F | -1.37437 | 5.96839  | 1.02922  |
| F | -2.18087 | 4.18119  | 0.06812  |
| O | -0.31629 | 1.99663  | -2.04031 |
| C | -0.61397 | 1.87303  | -3.35791 |
| C | -1.56279 | 3.04801  | -3.79795 |
| F | -0.88294 | 4.21049  | -3.88035 |
| F | -2.12928 | 2.81677  | -5.00524 |
| F | -2.54572 | 3.21423  | -2.89840 |
| C | -1.31425 | 0.49291  | -3.66725 |
| F | -0.76917 | -0.46595 | -2.89832 |
| F | -2.63206 | 0.54218  | -3.38830 |
| F | -1.18223 | 0.12692  | -4.96015 |

|    |          |          |          |
|----|----------|----------|----------|
| C  | 0.73956  | 1.95943  | -4.15656 |
| F  | 1.42708  | 0.80505  | -4.04153 |
| F  | 0.53727  | 2.19273  | -5.47505 |
| F  | 1.50719  | 2.94565  | -3.67324 |
| Al | -0.81383 | 1.55187  | -0.43604 |
| F  | 0.00000  | -0.00000 | 0.00000  |
| O  | 2.51851  | -1.21475 | 0.40729  |
| C  | 3.54134  | -0.60541 | -0.24149 |
| C  | 4.87112  | -0.95401 | 0.52084  |
| F  | 4.96713  | -0.24793 | 1.66550  |
| F  | 5.96428  | -0.67311 | -0.22825 |
| F  | 4.90373  | -2.25596 | 0.83768  |
| C  | 3.63466  | -1.12127 | -1.72637 |
| F  | 2.39756  | -1.21505 | -2.24863 |
| F  | 4.19071  | -2.34971 | -1.77359 |
| F  | 4.36636  | -0.30633 | -2.51363 |
| C  | 3.32431  | 0.95328  | -0.24080 |
| F  | 2.37417  | 1.27795  | -1.14662 |
| F  | 4.44739  | 1.63310  | -0.55195 |
| F  | 2.90026  | 1.36092  | 0.96202  |
| O  | 0.11370  | -2.62723 | -0.74500 |
| C  | 0.00456  | -3.95096 | -1.03078 |
| C  | -0.85879 | -4.69373 | 0.06030  |
| F  | -0.13303 | -4.89209 | 1.18096  |
| F  | -1.28954 | -5.90290 | -0.36906 |
| F  | -1.93270 | -3.96374 | 0.38860  |
| C  | -0.69818 | -4.07876 | -2.43199 |
| F  | -0.16203 | -3.21926 | -3.30740 |
| F  | -2.01403 | -3.80532 | -2.33193 |
| F  | -0.57316 | -5.32888 | -2.94051 |
| C  | 1.42801  | -4.62131 | -1.09797 |
| F  | 2.06606  | -4.29168 | -2.23731 |
| F  | 1.37437  | -5.96839 | -1.02922 |
| F  | 2.18087  | -4.18119 | -0.06812 |
| O  | 0.31629  | -1.99663 | 2.04031  |
| C  | 0.61397  | -1.87303 | 3.35791  |
| C  | 1.56279  | -3.04801 | 3.79795  |
| F  | 0.88294  | -4.21049 | 3.88035  |
| F  | 2.12928  | -2.81677 | 5.00524  |
| F  | 2.54572  | -3.21423 | 2.89840  |
| C  | 1.31425  | -0.49291 | 3.66725  |
| F  | 0.76917  | 0.46595  | 2.89832  |
| F  | 2.63206  | -0.54218 | 3.38830  |
| F  | 1.18223  | -0.12692 | 4.96015  |
| C  | -0.73956 | -1.95943 | 4.15656  |
| F  | -1.42708 | -0.80505 | 4.04153  |
| F  | -0.53727 | -2.19273 | 5.47505  |
| F  | -1.50719 | -2.94565 | 3.67324  |
| Al | 0.81383  | -1.55187 | 0.43604  |

#### Vibrational analysis

| mode | symmetry | wave number<br>cm**(-1) | IR intensity<br>km/mol | selection rules |       |
|------|----------|-------------------------|------------------------|-----------------|-------|
|      |          |                         |                        | IR              | RAMAN |
| 1    |          | -0.00                   | 0.00000                | -               | -     |



|    |    |        |         |     |     |
|----|----|--------|---------|-----|-----|
| 2  |    | -0.00  | 0.00000 | -   | -   |
| 3  |    | -0.00  | 0.00000 | -   | -   |
| 4  |    | -0.00  | 0.00000 | -   | -   |
| 5  |    | 0.00   | 0.00000 | -   | -   |
| 6  |    | 0.00   | 0.00000 | -   | -   |
| 7  | au | 5.94   | 0.00888 | YES | NO  |
| 8  | au | 11.29  | 0.00634 | YES | NO  |
| 9  | ag | 11.40  | 0.00000 | NO  | YES |
| 10 | ag | 13.65  | 0.00000 | NO  | YES |
| 11 | au | 18.31  | 0.00782 | YES | NO  |
| 12 | ag | 21.10  | 0.00000 | NO  | YES |
| 13 | au | 22.90  | 0.13822 | YES | NO  |
| 14 | au | 25.40  | 0.01215 | YES | NO  |
| 15 | au | 26.99  | 0.04041 | YES | NO  |
| 16 | ag | 27.06  | 0.00000 | NO  | YES |
| 17 | ag | 29.07  | 0.00000 | NO  | YES |
| 18 | ag | 32.42  | 0.00000 | NO  | YES |
| 19 | au | 34.15  | 0.02169 | YES | NO  |
| 20 | au | 35.89  | 0.06529 | YES | NO  |
| 21 | au | 37.66  | 0.03532 | YES | NO  |
| 22 | au | 39.47  | 0.13293 | YES | NO  |
| 23 | ag | 42.40  | 0.00000 | NO  | YES |
| 24 | au | 46.66  | 0.01983 | YES | NO  |
| 25 | ag | 47.32  | 0.00000 | NO  | YES |
| 26 | ag | 48.77  | 0.00000 | NO  | YES |
| 27 | ag | 51.56  | 0.00000 | NO  | YES |
| 28 | ag | 58.22  | 0.00000 | NO  | YES |
| 29 | au | 62.72  | 0.81582 | YES | NO  |
| 30 | ag | 65.16  | 0.00000 | NO  | YES |
| 31 | au | 65.91  | 0.36694 | YES | NO  |
| 32 | ag | 68.09  | 0.00000 | NO  | YES |
| 33 | au | 68.59  | 0.29482 | YES | NO  |
| 34 | au | 70.40  | 0.49921 | YES | NO  |
| 35 | ag | 71.01  | 0.00000 | NO  | YES |
| 36 | au | 71.52  | 0.04875 | YES | NO  |
| 37 | ag | 71.65  | 0.00000 | NO  | YES |
| 38 | ag | 73.13  | 0.00000 | NO  | YES |
| 39 | au | 74.76  | 0.33129 | YES | NO  |
| 40 | ag | 75.28  | 0.00000 | NO  | YES |
| 41 | au | 76.84  | 0.28987 | YES | NO  |
| 42 | ag | 78.45  | 0.00000 | NO  | YES |
| 43 | au | 78.64  | 0.01765 | YES | NO  |
| 44 | ag | 82.31  | 0.00000 | NO  | YES |
| 45 | ag | 83.45  | 0.00000 | NO  | YES |
| 46 | au | 83.80  | 0.14817 | YES | NO  |
| 47 | au | 85.53  | 0.42880 | YES | NO  |
| 48 | ag | 86.95  | 0.00000 | NO  | YES |
| 49 | au | 88.30  | 1.16063 | YES | NO  |
| 50 | ag | 91.31  | 0.00000 | NO  | YES |
| 51 | ag | 93.81  | 0.00000 | NO  | YES |
| 52 | au | 95.03  | 1.42235 | YES | NO  |
| 53 | au | 105.28 | 3.04029 | YES | NO  |
| 54 | ag | 109.61 | 0.00000 | NO  | YES |
| 55 | au | 148.52 | 1.81439 | YES | NO  |
| 56 | au | 151.13 | 1.89487 | YES | NO  |

|     |    |        |          |     |     |
|-----|----|--------|----------|-----|-----|
| 57  | ag | 154.16 | 0.00000  | NO  | YES |
| 58  | au | 155.12 | 0.85692  | YES | NO  |
| 59  | ag | 156.60 | 0.00000  | NO  | YES |
| 60  | au | 160.15 | 2.07224  | YES | NO  |
| 61  | ag | 160.22 | 0.00000  | NO  | YES |
| 62  | ag | 161.01 | 0.00000  | NO  | YES |
| 63  | au | 161.65 | 1.81452  | YES | NO  |
| 64  | ag | 162.69 | 0.00000  | NO  | YES |
| 65  | au | 164.33 | 1.27903  | YES | NO  |
| 66  | ag | 166.24 | 0.00000  | NO  | YES |
| 67  | au | 170.36 | 9.39120  | YES | NO  |
| 68  | au | 178.82 | 7.01450  | YES | NO  |
| 69  | au | 185.24 | 10.13773 | YES | NO  |
| 70  | ag | 187.98 | 0.00000  | NO  | YES |
| 71  | ag | 190.70 | 0.00000  | NO  | YES |
| 72  | au | 201.46 | 11.56042 | YES | NO  |
| 73  | au | 210.06 | 8.97200  | YES | NO  |
| 74  | ag | 212.13 | 0.00000  | NO  | YES |
| 75  | au | 246.74 | 16.28009 | YES | NO  |
| 76  | ag | 266.06 | 0.00000  | NO  | YES |
| 77  | au | 266.46 | 2.10372  | YES | NO  |
| 78  | ag | 270.16 | 0.00000  | NO  | YES |
| 79  | ag | 272.14 | 0.00000  | NO  | YES |
| 80  | au | 272.22 | 13.18201 | YES | NO  |
| 81  | au | 273.36 | 3.38380  | YES | NO  |
| 82  | ag | 278.68 | 0.00000  | NO  | YES |
| 83  | ag | 279.81 | 0.00000  | NO  | YES |
| 84  | au | 281.59 | 3.81976  | YES | NO  |
| 85  | au | 283.21 | 10.75543 | YES | NO  |
| 86  | ag | 284.14 | 0.00000  | NO  | YES |
| 87  | au | 285.97 | 4.79051  | YES | NO  |
| 88  | ag | 286.04 | 0.00000  | NO  | YES |
| 89  | au | 286.32 | 6.40694  | YES | NO  |
| 90  | ag | 286.82 | 0.00000  | NO  | YES |
| 91  | au | 286.89 | 1.41697  | YES | NO  |
| 92  | ag | 287.91 | 0.00000  | NO  | YES |
| 93  | au | 291.35 | 13.57462 | YES | NO  |
| 94  | ag | 305.85 | 0.00000  | NO  | YES |
| 95  | au | 306.64 | 14.50222 | YES | NO  |
| 96  | ag | 307.63 | 0.00000  | NO  | YES |
| 97  | au | 307.88 | 9.66664  | YES | NO  |
| 98  | ag | 311.72 | 0.00000  | NO  | YES |
| 99  | au | 312.82 | 1.54502  | YES | NO  |
| 100 | ag | 317.51 | 0.00000  | NO  | YES |
| 101 | au | 317.85 | 0.56626  | YES | NO  |
| 102 | ag | 317.91 | 0.00000  | NO  | YES |
| 103 | au | 319.09 | 2.98500  | YES | NO  |
| 104 | ag | 320.81 | 0.00000  | NO  | YES |
| 105 | au | 321.41 | 5.15909  | YES | NO  |
| 106 | ag | 321.97 | 0.00000  | NO  | YES |
| 107 | au | 324.25 | 2.11333  | YES | NO  |
| 108 | ag | 324.33 | 0.00000  | NO  | YES |
| 109 | au | 324.83 | 2.67766  | YES | NO  |
| 110 | ag | 328.09 | 0.00000  | NO  | YES |
| 111 | au | 329.95 | 1.93832  | YES | NO  |

|     |    |        |           |     |     |
|-----|----|--------|-----------|-----|-----|
| 112 | ag | 345.60 | 0.00000   | NO  | YES |
| 113 | au | 346.38 | 1.36097   | YES | NO  |
| 114 | ag | 351.77 | 0.00000   | NO  | YES |
| 115 | au | 352.73 | 9.19508   | YES | NO  |
| 116 | ag | 353.55 | 0.00000   | NO  | YES |
| 117 | au | 358.27 | 3.22394   | YES | NO  |
| 118 | ag | 359.09 | 0.00000   | NO  | YES |
| 119 | au | 366.13 | 35.81050  | YES | NO  |
| 120 | ag | 367.91 | 0.00000   | NO  | YES |
| 121 | au | 375.37 | 84.70424  | YES | NO  |
| 122 | ag | 393.96 | 0.00000   | NO  | YES |
| 123 | au | 407.22 | 14.33834  | YES | NO  |
| 124 | ag | 443.67 | 0.00000   | NO  | YES |
| 125 | ag | 449.65 | 0.00000   | NO  | YES |
| 126 | au | 450.76 | 89.18994  | YES | NO  |
| 127 | au | 453.93 | 88.96293  | YES | NO  |
| 128 | ag | 472.89 | 0.00000   | NO  | YES |
| 129 | au | 517.48 | 3.99575   | YES | NO  |
| 130 | ag | 517.48 | 0.00000   | NO  | YES |
| 131 | au | 518.18 | 11.59830  | YES | NO  |
| 132 | ag | 518.22 | 0.00000   | NO  | YES |
| 133 | au | 518.60 | 7.35187   | YES | NO  |
| 134 | ag | 518.77 | 0.00000   | NO  | YES |
| 135 | au | 519.86 | 15.74568  | YES | NO  |
| 136 | ag | 520.17 | 0.00000   | NO  | YES |
| 137 | ag | 520.41 | 0.00000   | NO  | YES |
| 138 | au | 520.44 | 9.01922   | YES | NO  |
| 139 | au | 520.49 | 10.31307  | YES | NO  |
| 140 | ag | 521.47 | 0.00000   | NO  | YES |
| 141 | au | 521.65 | 6.11686   | YES | NO  |
| 142 | ag | 523.89 | 0.00000   | NO  | YES |
| 143 | au | 524.27 | 1.99155   | YES | NO  |
| 144 | ag | 524.35 | 0.00000   | NO  | YES |
| 145 | au | 524.74 | 1.35318   | YES | NO  |
| 146 | ag | 524.94 | 0.00000   | NO  | YES |
| 147 | au | 528.04 | 0.93678   | YES | NO  |
| 148 | ag | 535.70 | 0.00000   | NO  | YES |
| 149 | ag | 551.92 | 0.00000   | NO  | YES |
| 150 | au | 552.25 | 10.95707  | YES | NO  |
| 151 | ag | 552.79 | 0.00000   | NO  | YES |
| 152 | au | 553.12 | 3.61828   | YES | NO  |
| 153 | au | 554.20 | 1.37731   | YES | NO  |
| 154 | ag | 554.26 | 0.00000   | NO  | YES |
| 155 | au | 554.35 | 0.19746   | YES | NO  |
| 156 | ag | 554.37 | 0.00000   | NO  | YES |
| 157 | au | 554.96 | 2.58946   | YES | NO  |
| 158 | ag | 555.08 | 0.00000   | NO  | YES |
| 159 | ag | 556.30 | 0.00000   | NO  | YES |
| 160 | au | 556.33 | 0.14542   | YES | NO  |
| 161 | ag | 562.92 | 0.00000   | NO  | YES |
| 162 | au | 563.67 | 47.69356  | YES | NO  |
| 163 | ag | 567.02 | 0.00000   | NO  | YES |
| 164 | au | 569.70 | 68.54847  | YES | NO  |
| 165 | au | 673.76 | 259.71161 | YES | NO  |
| 166 | ag | 705.15 | 0.00000   | NO  | YES |

|     |    |         |           |     |     |
|-----|----|---------|-----------|-----|-----|
| 167 | au | 706.21  | 23.04772  | YES | NO  |
| 168 | ag | 707.12  | 0.00000   | NO  | YES |
| 169 | au | 707.13  | 9.00736   | YES | NO  |
| 170 | ag | 707.83  | 0.00000   | NO  | YES |
| 171 | au | 708.37  | 154.49098 | YES | NO  |
| 172 | ag | 708.44  | 0.00000   | NO  | YES |
| 173 | au | 708.95  | 45.87446  | YES | NO  |
| 174 | au | 709.44  | 72.47322  | YES | NO  |
| 175 | ag | 709.62  | 0.00000   | NO  | YES |
| 176 | ag | 710.22  | 0.00000   | NO  | YES |
| 177 | au | 710.24  | 136.24866 | YES | NO  |
| 178 | au | 730.34  | 12.45939  | YES | NO  |
| 179 | ag | 730.80  | 0.00000   | NO  | YES |
| 180 | ag | 738.65  | 0.00000   | NO  | YES |
| 181 | au | 739.21  | 3.97495   | YES | NO  |
| 182 | ag | 739.66  | 0.00000   | NO  | YES |
| 183 | au | 739.88  | 3.70230   | YES | NO  |
| 184 | au | 792.07  | 7.42730   | YES | NO  |
| 185 | ag | 796.73  | 0.00000   | NO  | YES |
| 186 | ag | 850.43  | 0.00000   | NO  | YES |
| 187 | au | 853.21  | 43.07776  | YES | NO  |
| 188 | ag | 858.97  | 0.00000   | NO  | YES |
| 189 | au | 863.15  | 63.21366  | YES | NO  |
| 190 | ag | 954.51  | 0.00000   | NO  | YES |
| 191 | au | 957.50  | 30.20122  | YES | NO  |
| 192 | ag | 959.01  | 0.00000   | NO  | YES |
| 193 | au | 959.12  | 79.97029  | YES | NO  |
| 194 | ag | 961.33  | 0.00000   | NO  | YES |
| 195 | ag | 964.06  | 0.00000   | NO  | YES |
| 196 | au | 964.63  | 435.11440 | YES | NO  |
| 197 | au | 965.17  | 294.03699 | YES | NO  |
| 198 | au | 967.25  | 253.51473 | YES | NO  |
| 199 | ag | 968.42  | 0.00000   | NO  | YES |
| 200 | ag | 969.95  | 0.00000   | NO  | YES |
| 201 | au | 970.46  | 592.15533 | YES | NO  |
| 202 | au | 1102.77 | 2.80096   | YES | NO  |
| 203 | ag | 1104.61 | 0.00000   | NO  | YES |
| 204 | ag | 1107.23 | 0.00000   | NO  | YES |
| 205 | au | 1108.05 | 8.77261   | YES | NO  |
| 206 | ag | 1112.34 | 0.00000   | NO  | YES |
| 207 | au | 1113.53 | 3.16462   | YES | NO  |
| 208 | ag | 1135.30 | 0.00000   | NO  | YES |
| 209 | au | 1136.62 | 14.80126  | YES | NO  |
| 210 | ag | 1137.69 | 0.00000   | NO  | YES |
| 211 | au | 1139.67 | 18.59505  | YES | NO  |
| 212 | ag | 1143.29 | 0.00000   | NO  | YES |
| 213 | au | 1144.62 | 60.77711  | YES | NO  |
| 214 | au | 1145.39 | 16.84675  | YES | NO  |
| 215 | ag | 1146.01 | 0.00000   | NO  | YES |
| 216 | ag | 1147.14 | 0.00000   | NO  | YES |
| 217 | au | 1147.69 | 26.02008  | YES | NO  |
| 218 | au | 1154.50 | 48.39632  | YES | NO  |
| 219 | ag | 1154.75 | 0.00000   | NO  | YES |
| 220 | ag | 1184.81 | 0.00000   | NO  | YES |
| 221 | au | 1186.21 | 27.99365  | YES | NO  |

|     |    |         |            |     |     |
|-----|----|---------|------------|-----|-----|
| 222 | au | 1190.48 | 47.39151   | YES | NO  |
| 223 | ag | 1190.60 | 0.00000    | NO  | YES |
| 224 | ag | 1193.16 | 0.00000    | NO  | YES |
| 225 | au | 1193.82 | 21.18910   | YES | NO  |
| 226 | au | 1196.61 | 95.67532   | YES | NO  |
| 227 | ag | 1198.65 | 0.00000    | NO  | YES |
| 228 | au | 1202.09 | 13.99509   | YES | NO  |
| 229 | ag | 1204.77 | 0.00000    | NO  | YES |
| 230 | ag | 1207.92 | 0.00000    | NO  | YES |
| 231 | au | 1209.67 | 153.86905  | YES | NO  |
| 232 | ag | 1211.49 | 0.00000    | NO  | YES |
| 233 | au | 1211.98 | 440.53965  | YES | NO  |
| 234 | ag | 1213.58 | 0.00000    | NO  | YES |
| 235 | au | 1214.05 | 419.97017  | YES | NO  |
| 236 | au | 1225.54 | 658.48738  | YES | NO  |
| 237 | ag | 1227.02 | 0.00000    | NO  | YES |
| 238 | ag | 1229.73 | 0.00000    | NO  | YES |
| 239 | ag | 1231.93 | 0.00000    | NO  | YES |
| 240 | au | 1233.55 | 2521.84707 | YES | NO  |
| 241 | au | 1236.30 | 1796.14276 | YES | NO  |
| 242 | ag | 1237.66 | 0.00000    | NO  | YES |
| 243 | au | 1239.06 | 1031.86133 | YES | NO  |
| 244 | ag | 1242.61 | 0.00000    | NO  | YES |
| 245 | ag | 1244.90 | 0.00000    | NO  | YES |
| 246 | au | 1246.06 | 460.19351  | YES | NO  |
| 247 | au | 1249.25 | 95.00754   | YES | NO  |
| 248 | au | 1252.07 | 500.08174  | YES | NO  |
| 249 | au | 1256.74 | 975.21199  | YES | NO  |
| 250 | ag | 1257.18 | 0.00000    | NO  | YES |
| 251 | ag | 1259.92 | 0.00000    | NO  | YES |
| 252 | au | 1260.11 | 1003.63786 | YES | NO  |
| 253 | au | 1260.76 | 1393.40094 | YES | NO  |
| 254 | ag | 1261.89 | 0.00000    | NO  | YES |
| 255 | ag | 1265.19 | 0.00000    | NO  | YES |
| 256 | au | 1332.06 | 360.92258  | YES | NO  |
| 257 | ag | 1332.38 | 0.00000    | NO  | YES |
| 258 | ag | 1337.62 | 0.00000    | NO  | YES |
| 259 | au | 1338.50 | 445.89694  | YES | NO  |
| 260 | au | 1347.73 | 159.81710  | YES | NO  |
| 261 | ag | 1352.29 | 0.00000    | NO  | YES |

[Sr(HMB)<sub>2</sub>]<sup>2+</sup>

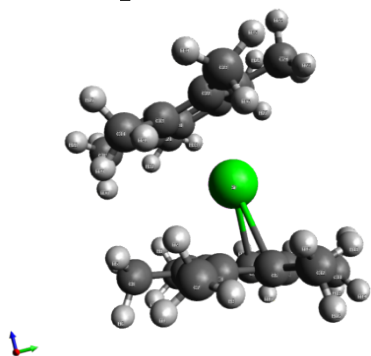

Atomic coordinates

|    |          |          |          |
|----|----------|----------|----------|
| C  | 1.47645  | -0.35665 | -2.18734 |
| C  | 0.39336  | -1.28878 | -2.14175 |
| C  | -0.94218 | -0.85639 | -2.41163 |
| C  | -1.20071 | 0.52346  | -2.68849 |
| C  | -0.11210 | 1.44864  | -2.77291 |
| C  | 1.21847  | 1.02254  | -2.46308 |
| C  | 2.89229  | -0.86338 | -2.00683 |
| H  | 3.04174  | -1.80828 | -2.56906 |
| H  | 3.13826  | -1.08729 | -0.94260 |
| H  | 3.64814  | -0.14767 | -2.37918 |
| C  | 0.67922  | -2.74973 | -1.87603 |
| H  | -0.19847 | -3.29039 | -1.47290 |
| H  | 1.52197  | -2.89305 | -1.17050 |
| H  | 0.96549  | -3.26765 | -2.82154 |
| C  | -2.05665 | -1.88191 | -2.46576 |
| H  | -2.96621 | -1.49265 | -2.95853 |
| H  | -2.35699 | -2.25116 | -1.45705 |
| H  | -1.73617 | -2.77250 | -3.04550 |
| C  | -2.61851 | 1.00832  | -2.91944 |
| H  | -2.90672 | 0.90761  | -3.99170 |
| H  | -2.74696 | 2.07736  | -2.65621 |
| H  | -3.36367 | 0.42978  | -2.33649 |
| C  | -0.36225 | 2.87173  | -3.23125 |
| H  | -1.21447 | 2.92321  | -3.93664 |
| H  | 0.51717  | 3.28393  | -3.76328 |
| H  | -0.59240 | 3.57408  | -2.39433 |
| C  | 2.34986  | 2.03134  | -2.45561 |
| H  | 2.82918  | 2.10345  | -3.45955 |
| H  | 3.15273  | 1.75959  | -1.74084 |
| H  | 2.00345  | 3.05195  | -2.19616 |
| Sr | -0.19700 | 0.59366  | 0.01035  |
| C  | 0.97896  | -0.91919 | 2.19318  |
| C  | 2.17006  | -1.81614 | 1.93209  |
| H  | 2.49699  | -2.32488 | 2.86899  |
| H  | 1.94074  | -2.61491 | 1.19913  |
| H  | 3.04738  | -1.25308 | 1.55619  |
| C  | -0.34677 | -1.44681 | 2.10853  |
| C  | -1.26663 | 0.77194  | 2.71071  |
| C  | 0.06042  | 1.30121  | 2.79255  |
| H  | 0.37790  | 2.90241  | 4.23687  |
| H  | 1.18579  | 3.17986  | 2.67227  |
| H  | -0.58372 | 3.39674  | 2.82013  |
| C  | -2.45099 | 1.63940  | 3.08790  |
| H  | -3.29525 | 1.03183  | 3.46708  |
| H  | -2.18409 | 2.35261  | 3.89267  |
| H  | -2.84421 | 2.24668  | 2.23741  |
| C  | -0.56084 | -2.92628 | 1.86524  |
| H  | 0.27651  | -3.52700 | 2.27079  |
| H  | -1.48252 | -3.28797 | 2.36131  |
| H  | -0.64837 | -3.18133 | 0.78370  |
| C  | -1.47081 | -0.58713 | 2.31568  |
| C  | -2.87642 | -1.12712 | 2.14513  |
| H  | -3.26689 | -1.54097 | 3.10398  |
| H  | -2.92205 | -1.94986 | 1.40322  |
| H  | -3.59297 | -0.34473 | 1.82272  |

|   |         |         |         |
|---|---------|---------|---------|
| C | 1.18432 | 0.44469 | 2.57154 |
| C | 2.59507 | 0.95461 | 2.78806 |
| H | 3.22638 | 0.17805 | 3.26534 |
| H | 2.61918 | 1.83775 | 3.45379 |
| H | 3.10760 | 1.24379 | 1.83961 |
| C | 0.26891 | 2.76266 | 3.13601 |

### Vibrational analysis

| mode | symmetry | wave number<br>cm**(-1) | IR intensity<br>km/mol | selection rules |       |
|------|----------|-------------------------|------------------------|-----------------|-------|
|      |          |                         |                        | IR              | RAMAN |
| 1    |          | -0.00                   | 0.00000                | -               | -     |
| 2    |          | -0.00                   | 0.00000                | -               | -     |
| 3    |          | 0.00                    | 0.00000                | -               | -     |
| 4    |          | 0.00                    | 0.00000                | -               | -     |
| 5    |          | 0.00                    | 0.00000                | -               | -     |
| 6    |          | 0.00                    | 0.00000                | -               | -     |
| 7    | a        | 8.77                    | 0.18762                | YES             | YES   |
| 8    | a        | 10.87                   | 0.98490                | YES             | YES   |
| 9    | a        | 31.16                   | 0.69472                | YES             | YES   |
| 10   | a        | 39.22                   | 0.45948                | YES             | YES   |
| 11   | a        | 59.82                   | 0.20062                | YES             | YES   |
| 12   | a        | 63.44                   | 0.04904                | YES             | YES   |
| 13   | a        | 64.13                   | 0.11729                | YES             | YES   |
| 14   | a        | 70.76                   | 0.05382                | YES             | YES   |
| 15   | a        | 73.05                   | 0.55402                | YES             | YES   |
| 16   | a        | 77.88                   | 0.10124                | YES             | YES   |
| 17   | a        | 81.46                   | 0.07319                | YES             | YES   |
| 18   | a        | 96.70                   | 0.02269                | YES             | YES   |
| 19   | a        | 100.80                  | 0.56156                | YES             | YES   |
| 20   | a        | 106.82                  | 0.23593                | YES             | YES   |
| 21   | a        | 111.39                  | 0.09234                | YES             | YES   |
| 22   | a        | 113.54                  | 0.08271                | YES             | YES   |
| 23   | a        | 117.94                  | 0.37724                | YES             | YES   |
| 24   | a        | 129.19                  | 0.01475                | YES             | YES   |
| 25   | a        | 135.19                  | 0.15857                | YES             | YES   |
| 26   | a        | 142.66                  | 0.14781                | YES             | YES   |
| 27   | a        | 149.51                  | 0.63547                | YES             | YES   |
| 28   | a        | 153.08                  | 0.50883                | YES             | YES   |
| 29   | a        | 155.09                  | 1.70224                | YES             | YES   |
| 30   | a        | 157.35                  | 1.47477                | YES             | YES   |
| 31   | a        | 163.19                  | 0.11040                | YES             | YES   |
| 32   | a        | 176.56                  | 1.24412                | YES             | YES   |
| 33   | a        | 177.81                  | 0.33260                | YES             | YES   |
| 34   | a        | 248.93                  | 1.77513                | YES             | YES   |
| 35   | a        | 272.77                  | 98.93500               | YES             | YES   |
| 36   | a        | 336.79                  | 0.57355                | YES             | YES   |
| 37   | a        | 339.69                  | 0.37957                | YES             | YES   |
| 38   | a        | 343.18                  | 0.21424                | YES             | YES   |
| 39   | a        | 345.85                  | 0.25310                | YES             | YES   |
| 40   | a        | 374.15                  | 1.12058                | YES             | YES   |
| 41   | a        | 375.67                  | 1.97566                | YES             | YES   |
| 42   | a        | 377.13                  | 1.65908                | YES             | YES   |
| 43   | a        | 381.90                  | 0.85278                | YES             | YES   |
| 44   | a        | 400.79                  | 0.00655                | YES             | YES   |

|    |   |         |          |     |     |
|----|---|---------|----------|-----|-----|
| 45 | a | 404.06  | 0.00996  | YES | YES |
| 46 | a | 405.87  | 0.02628  | YES | YES |
| 47 | a | 406.73  | 0.01201  | YES | YES |
| 48 | a | 439.71  | 0.07603  | YES | YES |
| 49 | a | 441.04  | 0.09658  | YES | YES |
| 50 | a | 441.59  | 0.08685  | YES | YES |
| 51 | a | 442.08  | 0.05222  | YES | YES |
| 52 | a | 445.17  | 0.01595  | YES | YES |
| 53 | a | 445.80  | 0.08267  | YES | YES |
| 54 | a | 544.47  | 1.42991  | YES | YES |
| 55 | a | 545.42  | 0.06458  | YES | YES |
| 56 | a | 569.40  | 0.70266  | YES | YES |
| 57 | a | 571.83  | 0.89811  | YES | YES |
| 58 | a | 574.17  | 1.52121  | YES | YES |
| 59 | a | 574.36  | 2.30112  | YES | YES |
| 60 | a | 575.13  | 1.22793  | YES | YES |
| 61 | a | 576.13  | 0.73207  | YES | YES |
| 62 | a | 577.95  | 1.71203  | YES | YES |
| 63 | a | 578.03  | 0.89854  | YES | YES |
| 64 | a | 695.37  | 0.47691  | YES | YES |
| 65 | a | 695.83  | 0.70657  | YES | YES |
| 66 | a | 792.73  | 2.13680  | YES | YES |
| 67 | a | 795.12  | 1.90065  | YES | YES |
| 68 | a | 796.25  | 1.89501  | YES | YES |
| 69 | a | 797.19  | 2.99740  | YES | YES |
| 70 | a | 955.95  | 0.35868  | YES | YES |
| 71 | a | 957.66  | 0.09512  | YES | YES |
| 72 | a | 959.28  | 0.41214  | YES | YES |
| 73 | a | 959.87  | 0.02985  | YES | YES |
| 74 | a | 968.53  | 10.65130 | YES | YES |
| 75 | a | 969.34  | 0.56733  | YES | YES |
| 76 | a | 972.99  | 1.22615  | YES | YES |
| 77 | a | 973.70  | 0.13367  | YES | YES |
| 78 | a | 994.73  | 3.16720  | YES | YES |
| 79 | a | 996.04  | 2.22182  | YES | YES |
| 80 | a | 996.70  | 2.49705  | YES | YES |
| 81 | a | 997.00  | 3.69351  | YES | YES |
| 82 | a | 1022.75 | 0.23873  | YES | YES |
| 83 | a | 1023.55 | 4.33100  | YES | YES |
| 84 | a | 1024.13 | 1.78326  | YES | YES |
| 85 | a | 1024.20 | 5.23056  | YES | YES |
| 86 | a | 1024.49 | 3.24194  | YES | YES |
| 87 | a | 1025.65 | 2.83761  | YES | YES |
| 88 | a | 1049.63 | 5.16315  | YES | YES |
| 89 | a | 1050.28 | 8.36119  | YES | YES |
| 90 | a | 1050.87 | 23.25830 | YES | YES |
| 91 | a | 1051.38 | 15.51832 | YES | YES |
| 92 | a | 1071.61 | 0.78046  | YES | YES |
| 93 | a | 1072.36 | 0.12882  | YES | YES |
| 94 | a | 1073.95 | 0.02578  | YES | YES |
| 95 | a | 1074.28 | 0.03659  | YES | YES |
| 96 | a | 1074.89 | 0.09506  | YES | YES |
| 97 | a | 1075.54 | 0.09016  | YES | YES |
| 98 | a | 1253.80 | 0.27698  | YES | YES |
| 99 | a | 1254.37 | 1.07211  | YES | YES |



|     |   |         |          |     |     |
|-----|---|---------|----------|-----|-----|
| 100 | a | 1295.28 | 8.44285  | YES | YES |
| 101 | a | 1297.11 | 0.32390  | YES | YES |
| 102 | a | 1305.62 | 0.30194  | YES | YES |
| 103 | a | 1307.17 | 0.15453  | YES | YES |
| 104 | a | 1355.70 | 4.01598  | YES | YES |
| 105 | a | 1358.53 | 4.86473  | YES | YES |
| 106 | a | 1359.69 | 2.74902  | YES | YES |
| 107 | a | 1361.01 | 4.07668  | YES | YES |
| 108 | a | 1363.88 | 9.02967  | YES | YES |
| 109 | a | 1364.54 | 0.98299  | YES | YES |
| 110 | a | 1366.98 | 4.47873  | YES | YES |
| 111 | a | 1367.27 | 1.26703  | YES | YES |
| 112 | a | 1370.08 | 48.42694 | YES | YES |
| 113 | a | 1371.08 | 38.88846 | YES | YES |
| 114 | a | 1373.60 | 16.09014 | YES | YES |
| 115 | a | 1375.26 | 2.16538  | YES | YES |
| 116 | a | 1376.13 | 5.35640  | YES | YES |
| 117 | a | 1376.80 | 3.11952  | YES | YES |
| 118 | a | 1378.97 | 8.87990  | YES | YES |
| 119 | a | 1384.13 | 16.29103 | YES | YES |
| 120 | a | 1397.62 | 0.02676  | YES | YES |
| 121 | a | 1397.79 | 0.62842  | YES | YES |
| 122 | a | 1399.24 | 1.19460  | YES | YES |
| 123 | a | 1399.83 | 0.66839  | YES | YES |
| 124 | a | 1412.90 | 5.60889  | YES | YES |
| 125 | a | 1413.25 | 59.11112 | YES | YES |
| 126 | a | 1415.11 | 70.10044 | YES | YES |
| 127 | a | 1415.56 | 17.39139 | YES | YES |
| 128 | a | 1427.32 | 1.20290  | YES | YES |
| 129 | a | 1428.67 | 1.01096  | YES | YES |
| 130 | a | 1431.09 | 5.78354  | YES | YES |
| 131 | a | 1432.06 | 0.92859  | YES | YES |
| 132 | a | 1433.39 | 0.23189  | YES | YES |
| 133 | a | 1435.19 | 1.15581  | YES | YES |
| 134 | a | 1442.56 | 80.19441 | YES | YES |
| 135 | a | 1443.04 | 50.55634 | YES | YES |
| 136 | a | 1443.60 | 85.15845 | YES | YES |
| 137 | a | 1444.77 | 19.07471 | YES | YES |
| 138 | a | 1460.60 | 3.29140  | YES | YES |
| 139 | a | 1463.58 | 2.67724  | YES | YES |
| 140 | a | 1464.14 | 0.19643  | YES | YES |
| 141 | a | 1465.52 | 1.09123  | YES | YES |
| 142 | a | 1478.28 | 1.52888  | YES | YES |
| 143 | a | 1479.81 | 1.16018  | YES | YES |
| 144 | a | 1542.55 | 0.09214  | YES | YES |
| 145 | a | 1543.76 | 0.25822  | YES | YES |
| 146 | a | 1544.27 | 0.50673  | YES | YES |
| 147 | a | 1544.73 | 0.50188  | YES | YES |
| 148 | a | 2934.48 | 5.80179  | YES | YES |
| 149 | a | 2934.70 | 1.81421  | YES | YES |
| 150 | a | 2937.04 | 4.59627  | YES | YES |
| 151 | a | 2942.11 | 4.38375  | YES | YES |
| 152 | a | 2947.50 | 3.06343  | YES | YES |
| 153 | a | 2950.21 | 1.17904  | YES | YES |
| 154 | a | 2950.36 | 2.36273  | YES | YES |

|     |   |         |         |     |     |
|-----|---|---------|---------|-----|-----|
| 155 | a | 2950.86 | 2.72368 | YES | YES |
| 156 | a | 2951.20 | 4.73620 | YES | YES |
| 157 | a | 2951.80 | 1.17242 | YES | YES |
| 158 | a | 2952.13 | 4.85981 | YES | YES |
| 159 | a | 2952.90 | 0.34414 | YES | YES |
| 160 | a | 3030.56 | 3.53477 | YES | YES |
| 161 | a | 3032.34 | 2.40593 | YES | YES |
| 162 | a | 3032.70 | 2.39708 | YES | YES |
| 163 | a | 3033.07 | 4.24691 | YES | YES |
| 164 | a | 3034.21 | 2.37718 | YES | YES |
| 165 | a | 3035.01 | 6.46790 | YES | YES |
| 166 | a | 3035.19 | 3.23834 | YES | YES |
| 167 | a | 3040.12 | 1.83861 | YES | YES |
| 168 | a | 3040.50 | 0.39132 | YES | YES |
| 169 | a | 3042.76 | 0.25598 | YES | YES |
| 170 | a | 3044.02 | 0.27748 | YES | YES |
| 171 | a | 3047.55 | 0.26631 | YES | YES |
| 172 | a | 3062.74 | 1.14358 | YES | YES |
| 173 | a | 3063.44 | 0.49828 | YES | YES |
| 174 | a | 3064.98 | 2.92045 | YES | YES |
| 175 | a | 3065.19 | 3.61802 | YES | YES |
| 176 | a | 3071.12 | 2.84415 | YES | YES |
| 177 | a | 3079.43 | 2.77179 | YES | YES |
| 178 | a | 3083.85 | 0.04220 | YES | YES |
| 179 | a | 3084.77 | 0.06301 | YES | YES |
| 180 | a | 3084.85 | 0.00162 | YES | YES |
| 181 | a | 3088.72 | 0.50201 | YES | YES |
| 182 | a | 3093.89 | 0.83521 | YES | YES |
| 183 | a | 3096.02 | 1.16583 | YES | YES |

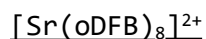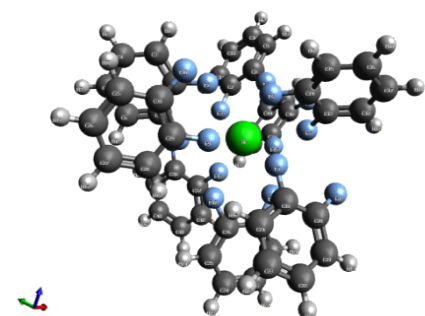

Atomic coordinates

|   |          |         |          |
|---|----------|---------|----------|
| C | -1.93825 | 2.55549 | 0.42523  |
| C | -1.74989 | 2.40387 | 1.80007  |
| C | -2.28565 | 3.30962 | 2.70931  |
| H | -2.13038 | 3.15834 | 3.78794  |
| C | -3.03385 | 4.38720 | 2.19983  |
| H | -3.47102 | 5.11689 | 2.89849  |
| C | -3.22876 | 4.53570 | 0.81490  |
| H | -3.81971 | 5.38102 | 0.43055  |
| C | -2.67684 | 3.61316 | -0.09298 |
| H | -2.81641 | 3.70384 | -1.17993 |
| F | -1.38792 | 1.59846 | -0.39723 |

|    |          |          |          |
|----|----------|----------|----------|
| F  | -1.05329 | 1.29875  | 2.22388  |
| C  | 1.87215  | 2.29039  | 2.03829  |
| C  | 1.90449  | 1.35918  | 3.07795  |
| C  | 2.56566  | 1.63268  | 4.27054  |
| H  | 2.58740  | 0.87735  | 5.07020  |
| C  | 3.20431  | 2.88083  | 4.39694  |
| H  | 3.73544  | 3.12043  | 5.33089  |
| C  | 3.17008  | 3.81734  | 3.34822  |
| H  | 3.67516  | 4.78871  | 3.46165  |
| C  | 2.49603  | 3.52808  | 2.14722  |
| H  | 2.45634  | 4.23576  | 1.30636  |
| F  | 1.21315  | 1.92562  | 0.88697  |
| F  | 1.29215  | 0.15126  | 2.85940  |
| C  | 0.98607  | -3.10853 | 2.73880  |
| C  | -0.20479 | -2.68011 | 3.32890  |
| C  | -0.75361 | -3.34921 | 4.41847  |
| H  | -1.69515 | -2.99339 | 4.86349  |
| C  | -0.06926 | -4.47582 | 4.91261  |
| H  | -0.48368 | -5.02186 | 5.77385  |
| C  | 1.12937  | -4.90715 | 4.31668  |
| H  | 1.65344  | -5.79093 | 4.71152  |
| C  | 1.67165  | -4.22144 | 3.21370  |
| H  | 2.60482  | -4.53916 | 2.72534  |
| F  | 1.45301  | -2.39118 | 1.66030  |
| F  | -0.82362 | -1.57626 | 2.78466  |
| C  | -1.21011 | -3.84119 | -0.57229 |
| C  | -0.17513 | -4.74959 | -0.83222 |
| C  | -0.28920 | -5.62641 | -1.91573 |
| H  | 0.52883  | -6.33650 | -2.11216 |
| C  | -1.44318 | -5.58429 | -2.71717 |
| H  | -1.53453 | -6.27731 | -3.56756 |
| C  | -2.48114 | -4.68040 | -2.43148 |
| H  | -3.39054 | -4.66639 | -3.05128 |
| C  | -2.36927 | -3.79735 | -1.34331 |
| H  | -3.16536 | -3.08327 | -1.08574 |
| F  | -1.04058 | -2.93882 | 0.45787  |
| F  | 0.92159  | -4.74203 | -0.05686 |
| Sr | 0.05413  | -0.47710 | 0.50674  |
| C  | -5.38025 | 1.46881  | 1.49878  |
| C  | -5.90732 | 1.75615  | 0.22868  |
| C  | -5.34810 | 1.18042  | -0.92571 |
| H  | -5.77238 | 1.40213  | -1.91693 |
| C  | -4.24752 | 0.31195  | -0.82010 |
| H  | -3.77921 | -0.14623 | -1.70314 |
| C  | -3.73458 | 0.04269  | 0.44648  |
| F  | -2.62544 | -0.76949 | 0.58157  |
| H  | -6.77090 | 2.43355  | 0.14375  |
| C  | -4.28779 | 0.60237  | 1.60619  |
| F  | -3.74014 | 0.32121  | 2.79952  |
| H  | -5.80441 | 1.90268  | 2.41696  |
| F  | 1.06201  | -2.06422 | -1.41354 |
| C  | 0.56002  | -2.15499 | -2.68804 |
| C  | 1.25433  | -2.82782 | -3.68898 |
| H  | 2.21585  | -3.31048 | -3.45769 |
| C  | 0.68523  | -2.86507 | -4.97613 |

|   |          |          |          |
|---|----------|----------|----------|
| H | 1.21521  | -3.39279 | -5.78377 |
| C | -0.54719 | -2.23858 | -5.23442 |
| H | -0.98230 | -2.27458 | -6.24486 |
| C | -1.23742 | -1.56259 | -4.21135 |
| H | -2.20094 | -1.06233 | -4.39014 |
| C | -0.66417 | -1.53472 | -2.94405 |
| F | -1.27320 | -0.88378 | -1.89906 |
| F | 0.97000  | 0.79152  | -1.66689 |
| C | 0.92407  | 1.63537  | -2.75979 |
| C | 0.65410  | 2.99614  | -2.55351 |
| C | 0.60859  | 3.86149  | -3.65195 |
| H | 0.39706  | 4.92768  | -3.47646 |
| C | 0.84324  | 3.35570  | -4.94182 |
| H | 0.81058  | 4.03905  | -5.80427 |
| C | 1.12911  | 1.99270  | -5.13173 |
| H | 1.32607  | 1.60102  | -6.14121 |
| F | 0.45103  | 3.46162  | -1.30692 |
| C | 1.17445  | 1.11971  | -4.03078 |
| H | 1.40878  | 0.05156  | -4.15104 |
| H | 5.95863  | 1.20816  | 2.79748  |
| C | 5.41675  | 1.29131  | 1.84332  |
| C | 5.70007  | 2.30469  | 0.91283  |
| H | 6.48766  | 3.03990  | 1.13873  |
| C | 4.99567  | 2.37800  | -0.30167 |
| H | 5.23084  | 3.16625  | -1.03309 |
| C | 3.99253  | 1.43822  | -0.59659 |
| H | 3.42981  | 1.47020  | -1.54021 |
| C | 3.71798  | 0.44585  | 0.34155  |
| F | 2.70657  | -0.46656 | 0.10883  |
| C | 4.41923  | 0.35572  | 1.55205  |
| F | 4.10364  | -0.61389 | 2.42730  |

### Vibrational analysis

| mode | symmetry | wave number<br>cm <sup>**</sup> (-1) | IR intensity<br>km/mol | selection rules |       |
|------|----------|--------------------------------------|------------------------|-----------------|-------|
|      |          |                                      |                        | IR              | RAMAN |
| 1    |          | -0.00                                | 0.00000                | -               | -     |
| 2    |          | -0.00                                | 0.00000                | -               | -     |
| 3    |          | -0.00                                | 0.00000                | -               | -     |
| 4    |          | -0.00                                | 0.00000                | -               | -     |
| 5    |          | -0.00                                | 0.00000                | -               | -     |
| 6    |          | 0.00                                 | 0.00000                | -               | -     |
| 7    | a        | 9.40                                 | 0.20188                | YES             | YES   |
| 8    | a        | 12.90                                | 0.14350                | YES             | YES   |
| 9    | a        | 13.97                                | 0.15909                | YES             | YES   |
| 10   | a        | 17.69                                | 0.71841                | YES             | YES   |
| 11   | a        | 19.45                                | 0.16194                | YES             | YES   |
| 12   | a        | 22.76                                | 0.15309                | YES             | YES   |
| 13   | a        | 25.04                                | 0.68511                | YES             | YES   |
| 14   | a        | 28.10                                | 0.56066                | YES             | YES   |
| 15   | a        | 28.93                                | 1.05944                | YES             | YES   |
| 16   | a        | 32.54                                | 0.00887                | YES             | YES   |
| 17   | a        | 36.40                                | 0.12945                | YES             | YES   |
| 18   | a        | 38.91                                | 0.16873                | YES             | YES   |
| 19   | a        | 43.36                                | 0.57441                | YES             | YES   |

|    |   |        |          |     |     |
|----|---|--------|----------|-----|-----|
| 20 | a | 45.83  | 0.61483  | YES | YES |
| 21 | a | 46.73  | 0.33659  | YES | YES |
| 22 | a | 49.81  | 0.80895  | YES | YES |
| 23 | a | 51.74  | 0.36637  | YES | YES |
| 24 | a | 53.27  | 0.18476  | YES | YES |
| 25 | a | 58.56  | 1.50823  | YES | YES |
| 26 | a | 59.46  | 1.96207  | YES | YES |
| 27 | a | 63.17  | 0.25399  | YES | YES |
| 28 | a | 65.24  | 2.48780  | YES | YES |
| 29 | a | 66.58  | 0.26028  | YES | YES |
| 30 | a | 69.21  | 0.86909  | YES | YES |
| 31 | a | 70.53  | 1.19590  | YES | YES |
| 32 | a | 72.12  | 0.61588  | YES | YES |
| 33 | a | 73.43  | 1.45105  | YES | YES |
| 34 | a | 75.73  | 1.50943  | YES | YES |
| 35 | a | 78.22  | 0.59911  | YES | YES |
| 36 | a | 79.15  | 0.12888  | YES | YES |
| 37 | a | 81.73  | 0.79810  | YES | YES |
| 38 | a | 83.74  | 0.93454  | YES | YES |
| 39 | a | 87.72  | 0.51895  | YES | YES |
| 40 | a | 93.40  | 3.93349  | YES | YES |
| 41 | a | 94.30  | 0.85331  | YES | YES |
| 42 | a | 98.05  | 0.15816  | YES | YES |
| 43 | a | 103.10 | 0.52844  | YES | YES |
| 44 | a | 107.07 | 9.74544  | YES | YES |
| 45 | a | 108.69 | 2.05110  | YES | YES |
| 46 | a | 117.49 | 15.66631 | YES | YES |
| 47 | a | 132.81 | 2.47670  | YES | YES |
| 48 | a | 139.00 | 36.56283 | YES | YES |
| 49 | a | 144.69 | 39.46512 | YES | YES |
| 50 | a | 148.83 | 13.61788 | YES | YES |
| 51 | a | 155.37 | 47.18294 | YES | YES |
| 52 | a | 197.41 | 0.15828  | YES | YES |
| 53 | a | 199.48 | 0.60841  | YES | YES |
| 54 | a | 200.76 | 3.03129  | YES | YES |
| 55 | a | 201.58 | 0.88792  | YES | YES |
| 56 | a | 203.61 | 0.52733  | YES | YES |
| 57 | a | 209.01 | 0.31106  | YES | YES |
| 58 | a | 210.64 | 0.33917  | YES | YES |
| 59 | a | 216.43 | 0.42551  | YES | YES |
| 60 | a | 276.59 | 0.67047  | YES | YES |
| 61 | a | 279.85 | 0.50665  | YES | YES |
| 62 | a | 280.77 | 1.05129  | YES | YES |
| 63 | a | 284.86 | 0.96082  | YES | YES |
| 64 | a | 286.36 | 1.05038  | YES | YES |
| 65 | a | 288.03 | 1.03579  | YES | YES |
| 66 | a | 289.55 | 1.41475  | YES | YES |
| 67 | a | 290.84 | 2.08472  | YES | YES |
| 68 | a | 293.95 | 1.38413  | YES | YES |
| 69 | a | 300.00 | 1.60470  | YES | YES |
| 70 | a | 303.27 | 3.79248  | YES | YES |
| 71 | a | 304.53 | 0.25385  | YES | YES |
| 72 | a | 307.63 | 4.14686  | YES | YES |
| 73 | a | 309.11 | 3.12224  | YES | YES |
| 74 | a | 311.47 | 7.12165  | YES | YES |

|     |   |        |           |     |     |
|-----|---|--------|-----------|-----|-----|
| 75  | a | 315.37 | 3.01696   | YES | YES |
| 76  | a | 431.43 | 1.05972   | YES | YES |
| 77  | a | 431.97 | 0.65109   | YES | YES |
| 78  | a | 434.23 | 0.64029   | YES | YES |
| 79  | a | 434.46 | 0.44982   | YES | YES |
| 80  | a | 434.99 | 0.15183   | YES | YES |
| 81  | a | 435.55 | 0.38120   | YES | YES |
| 82  | a | 436.44 | 0.08175   | YES | YES |
| 83  | a | 437.77 | 0.12472   | YES | YES |
| 84  | a | 440.74 | 1.05919   | YES | YES |
| 85  | a | 441.38 | 3.73806   | YES | YES |
| 86  | a | 441.46 | 0.73918   | YES | YES |
| 87  | a | 442.47 | 2.63785   | YES | YES |
| 88  | a | 451.90 | 5.13010   | YES | YES |
| 89  | a | 452.70 | 0.55865   | YES | YES |
| 90  | a | 454.20 | 0.23354   | YES | YES |
| 91  | a | 454.70 | 2.20483   | YES | YES |
| 92  | a | 532.04 | 1.49137   | YES | YES |
| 93  | a | 532.30 | 4.44960   | YES | YES |
| 94  | a | 533.63 | 0.08812   | YES | YES |
| 95  | a | 534.30 | 9.85707   | YES | YES |
| 96  | a | 534.73 | 5.68655   | YES | YES |
| 97  | a | 535.57 | 0.08686   | YES | YES |
| 98  | a | 535.76 | 0.67692   | YES | YES |
| 99  | a | 535.96 | 1.14852   | YES | YES |
| 100 | a | 539.66 | 2.42122   | YES | YES |
| 101 | a | 540.00 | 3.65897   | YES | YES |
| 102 | a | 540.48 | 7.78088   | YES | YES |
| 103 | a | 540.91 | 2.12542   | YES | YES |
| 104 | a | 541.45 | 2.62551   | YES | YES |
| 105 | a | 543.06 | 0.24234   | YES | YES |
| 106 | a | 543.12 | 0.26860   | YES | YES |
| 107 | a | 544.08 | 0.10491   | YES | YES |
| 108 | a | 557.78 | 15.24513  | YES | YES |
| 109 | a | 558.38 | 25.67234  | YES | YES |
| 110 | a | 558.83 | 22.20575  | YES | YES |
| 111 | a | 559.76 | 10.68422  | YES | YES |
| 112 | a | 561.83 | 12.07210  | YES | YES |
| 113 | a | 562.18 | 11.71211  | YES | YES |
| 114 | a | 563.24 | 8.07145   | YES | YES |
| 115 | a | 564.93 | 12.19620  | YES | YES |
| 116 | a | 663.01 | 0.31530   | YES | YES |
| 117 | a | 664.18 | 0.20306   | YES | YES |
| 118 | a | 667.42 | 0.01188   | YES | YES |
| 119 | a | 669.63 | 0.02351   | YES | YES |
| 120 | a | 670.75 | 0.18293   | YES | YES |
| 121 | a | 671.09 | 0.03199   | YES | YES |
| 122 | a | 673.81 | 0.17203   | YES | YES |
| 123 | a | 674.43 | 0.09651   | YES | YES |
| 124 | a | 745.14 | 127.59181 | YES | YES |
| 125 | a | 745.87 | 43.22491  | YES | YES |
| 126 | a | 747.61 | 35.75457  | YES | YES |
| 127 | a | 748.01 | 89.62476  | YES | YES |
| 128 | a | 749.22 | 128.24377 | YES | YES |
| 129 | a | 749.43 | 78.38238  | YES | YES |

|     |   |         |           |     |     |
|-----|---|---------|-----------|-----|-----|
| 130 | a | 749.60  | 59.32348  | YES | YES |
| 131 | a | 750.31  | 41.88187  | YES | YES |
| 132 | a | 750.32  | 19.15937  | YES | YES |
| 133 | a | 751.17  | 19.17517  | YES | YES |
| 134 | a | 751.62  | 40.76422  | YES | YES |
| 135 | a | 752.56  | 9.85453   | YES | YES |
| 136 | a | 753.37  | 64.16104  | YES | YES |
| 137 | a | 754.07  | 133.28967 | YES | YES |
| 138 | a | 755.68  | 227.86848 | YES | YES |
| 139 | a | 761.81  | 12.00802  | YES | YES |
| 140 | a | 816.07  | 5.17497   | YES | YES |
| 141 | a | 817.98  | 6.33392   | YES | YES |
| 142 | a | 818.95  | 13.42704  | YES | YES |
| 143 | a | 819.77  | 23.26121  | YES | YES |
| 144 | a | 826.58  | 19.71005  | YES | YES |
| 145 | a | 827.39  | 17.79510  | YES | YES |
| 146 | a | 827.85  | 27.56666  | YES | YES |
| 147 | a | 828.88  | 8.45173   | YES | YES |
| 148 | a | 832.94  | 0.91005   | YES | YES |
| 149 | a | 833.92  | 1.33747   | YES | YES |
| 150 | a | 836.67  | 0.06073   | YES | YES |
| 151 | a | 836.72  | 1.57636   | YES | YES |
| 152 | a | 837.79  | 0.73401   | YES | YES |
| 153 | a | 839.23  | 0.24402   | YES | YES |
| 154 | a | 840.97  | 1.37334   | YES | YES |
| 155 | a | 842.59  | 0.09192   | YES | YES |
| 156 | a | 924.26  | 2.37350   | YES | YES |
| 157 | a | 925.87  | 2.80442   | YES | YES |
| 158 | a | 927.61  | 5.65350   | YES | YES |
| 159 | a | 928.32  | 2.61207   | YES | YES |
| 160 | a | 929.87  | 2.45188   | YES | YES |
| 161 | a | 930.84  | 0.59323   | YES | YES |
| 162 | a | 931.86  | 0.70515   | YES | YES |
| 163 | a | 932.04  | 7.60241   | YES | YES |
| 164 | a | 972.47  | 0.05166   | YES | YES |
| 165 | a | 973.18  | 0.07314   | YES | YES |
| 166 | a | 974.16  | 0.00663   | YES | YES |
| 167 | a | 977.49  | 0.08939   | YES | YES |
| 168 | a | 977.76  | 0.07346   | YES | YES |
| 169 | a | 978.10  | 0.07445   | YES | YES |
| 170 | a | 979.65  | 0.01527   | YES | YES |
| 171 | a | 979.80  | 0.01704   | YES | YES |
| 172 | a | 1015.98 | 4.02951   | YES | YES |
| 173 | a | 1017.34 | 6.20912   | YES | YES |
| 174 | a | 1017.45 | 3.06620   | YES | YES |
| 175 | a | 1017.85 | 2.15010   | YES | YES |
| 176 | a | 1022.36 | 2.96376   | YES | YES |
| 177 | a | 1022.86 | 4.83163   | YES | YES |
| 178 | a | 1023.50 | 2.23927   | YES | YES |
| 179 | a | 1026.08 | 4.31639   | YES | YES |
| 180 | a | 1077.81 | 16.58676  | YES | YES |
| 181 | a | 1079.70 | 13.60400  | YES | YES |
| 182 | a | 1080.91 | 38.70175  | YES | YES |
| 183 | a | 1082.32 | 49.40236  | YES | YES |
| 184 | a | 1086.95 | 53.50158  | YES | YES |

|     |   |         |           |     |     |
|-----|---|---------|-----------|-----|-----|
| 185 | a | 1087.39 | 14.93527  | YES | YES |
| 186 | a | 1087.87 | 20.67573  | YES | YES |
| 187 | a | 1088.79 | 26.73194  | YES | YES |
| 188 | a | 1137.14 | 6.42494   | YES | YES |
| 189 | a | 1138.02 | 6.05137   | YES | YES |
| 190 | a | 1138.69 | 0.91050   | YES | YES |
| 191 | a | 1138.87 | 3.02154   | YES | YES |
| 192 | a | 1139.00 | 6.85202   | YES | YES |
| 193 | a | 1139.44 | 1.87184   | YES | YES |
| 194 | a | 1140.05 | 3.22363   | YES | YES |
| 195 | a | 1140.29 | 3.17975   | YES | YES |
| 196 | a | 1140.46 | 1.01881   | YES | YES |
| 197 | a | 1140.98 | 2.22886   | YES | YES |
| 198 | a | 1143.41 | 25.23709  | YES | YES |
| 199 | a | 1145.95 | 42.56018  | YES | YES |
| 200 | a | 1152.39 | 35.51222  | YES | YES |
| 201 | a | 1155.44 | 85.77020  | YES | YES |
| 202 | a | 1162.19 | 57.01703  | YES | YES |
| 203 | a | 1164.45 | 5.83251   | YES | YES |
| 204 | a | 1235.96 | 11.42343  | YES | YES |
| 205 | a | 1237.35 | 177.39111 | YES | YES |
| 206 | a | 1238.01 | 72.38970  | YES | YES |
| 207 | a | 1238.80 | 18.22370  | YES | YES |
| 208 | a | 1240.21 | 69.16162  | YES | YES |
| 209 | a | 1240.35 | 36.06904  | YES | YES |
| 210 | a | 1243.35 | 156.42746 | YES | YES |
| 211 | a | 1246.10 | 0.17758   | YES | YES |
| 212 | a | 1246.12 | 8.04176   | YES | YES |
| 213 | a | 1246.39 | 1.15933   | YES | YES |
| 214 | a | 1246.79 | 7.04731   | YES | YES |
| 215 | a | 1250.99 | 34.14822  | YES | YES |
| 216 | a | 1266.94 | 80.45049  | YES | YES |
| 217 | a | 1270.12 | 77.32678  | YES | YES |
| 218 | a | 1271.48 | 9.56281   | YES | YES |
| 219 | a | 1272.83 | 136.11234 | YES | YES |
| 220 | a | 1374.14 | 1.03703   | YES | YES |
| 221 | a | 1376.93 | 1.20446   | YES | YES |
| 222 | a | 1377.60 | 1.68473   | YES | YES |
| 223 | a | 1377.66 | 1.65699   | YES | YES |
| 224 | a | 1380.70 | 4.01182   | YES | YES |
| 225 | a | 1381.93 | 1.85255   | YES | YES |
| 226 | a | 1383.26 | 1.94245   | YES | YES |
| 227 | a | 1383.62 | 1.92053   | YES | YES |
| 228 | a | 1453.59 | 10.21149  | YES | YES |
| 229 | a | 1455.69 | 19.17319  | YES | YES |
| 230 | a | 1456.38 | 12.57782  | YES | YES |
| 231 | a | 1456.62 | 13.71409  | YES | YES |
| 232 | a | 1458.17 | 0.94239   | YES | YES |
| 233 | a | 1458.41 | 17.90035  | YES | YES |
| 234 | a | 1459.38 | 9.87295   | YES | YES |
| 235 | a | 1459.78 | 12.40830  | YES | YES |
| 236 | a | 1491.77 | 198.75431 | YES | YES |
| 237 | a | 1492.11 | 188.93000 | YES | YES |
| 238 | a | 1493.68 | 269.48638 | YES | YES |
| 239 | a | 1495.09 | 92.77024  | YES | YES |



|     |   |         |           |     |     |
|-----|---|---------|-----------|-----|-----|
| 240 | a | 1499.39 | 113.38756 | YES | YES |
| 241 | a | 1502.45 | 115.21100 | YES | YES |
| 242 | a | 1503.14 | 279.86302 | YES | YES |
| 243 | a | 1507.43 | 252.19120 | YES | YES |
| 244 | a | 1605.46 | 1.62378   | YES | YES |
| 245 | a | 1607.30 | 5.71898   | YES | YES |
| 246 | a | 1607.96 | 3.15184   | YES | YES |
| 247 | a | 1608.82 | 1.32574   | YES | YES |
| 248 | a | 1608.97 | 0.61874   | YES | YES |
| 249 | a | 1610.17 | 1.34637   | YES | YES |
| 250 | a | 1610.89 | 0.99409   | YES | YES |
| 251 | a | 1611.46 | 2.07496   | YES | YES |
| 252 | a | 1629.78 | 22.34416  | YES | YES |
| 253 | a | 1631.78 | 13.90763  | YES | YES |
| 254 | a | 1632.74 | 6.93468   | YES | YES |
| 255 | a | 1633.03 | 24.81998  | YES | YES |
| 256 | a | 1637.04 | 17.34278  | YES | YES |
| 257 | a | 1637.34 | 14.61006  | YES | YES |
| 258 | a | 1638.46 | 9.70899   | YES | YES |
| 259 | a | 1638.77 | 7.46999   | YES | YES |
| 260 | a | 3121.14 | 0.18153   | YES | YES |
| 261 | a | 3121.21 | 0.47784   | YES | YES |
| 262 | a | 3121.49 | 0.44317   | YES | YES |
| 263 | a | 3122.11 | 1.35743   | YES | YES |
| 264 | a | 3124.65 | 0.40641   | YES | YES |
| 265 | a | 3124.68 | 0.29375   | YES | YES |
| 266 | a | 3125.04 | 0.21702   | YES | YES |
| 267 | a | 3125.56 | 0.54018   | YES | YES |
| 268 | a | 3129.12 | 1.77560   | YES | YES |
| 269 | a | 3130.22 | 1.25630   | YES | YES |
| 270 | a | 3131.55 | 1.72639   | YES | YES |
| 271 | a | 3131.98 | 1.28550   | YES | YES |
| 272 | a | 3132.90 | 1.21639   | YES | YES |
| 273 | a | 3134.29 | 1.37643   | YES | YES |
| 274 | a | 3134.57 | 2.18880   | YES | YES |
| 275 | a | 3134.72 | 0.63888   | YES | YES |
| 276 | a | 3134.94 | 0.99132   | YES | YES |
| 277 | a | 3136.45 | 0.82683   | YES | YES |
| 278 | a | 3138.48 | 3.58419   | YES | YES |
| 279 | a | 3139.37 | 0.69832   | YES | YES |
| 280 | a | 3140.14 | 1.41813   | YES | YES |
| 281 | a | 3140.54 | 2.76679   | YES | YES |
| 282 | a | 3141.57 | 0.36275   | YES | YES |
| 283 | a | 3141.95 | 3.88206   | YES | YES |
| 284 | a | 3141.99 | 0.22745   | YES | YES |
| 285 | a | 3142.16 | 2.53532   | YES | YES |
| 286 | a | 3143.66 | 2.68544   | YES | YES |
| 287 | a | 3143.90 | 0.92989   | YES | YES |
| 288 | a | 3145.48 | 1.96605   | YES | YES |
| 289 | a | 3146.36 | 0.63419   | YES | YES |
| 290 | a | 3146.40 | 2.06558   | YES | YES |
| 291 | a | 3146.58 | 1.96782   | YES | YES |

[Ga(HMB)]<sup>+</sup>

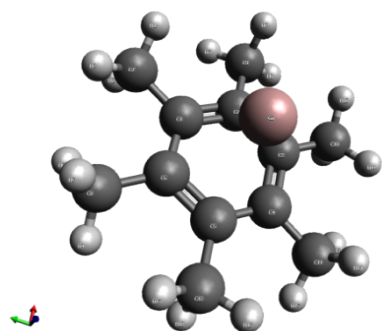

### Atomic coordinates

|    |          |          |          |
|----|----------|----------|----------|
| C  | 0.71600  | 1.24015  | -0.03007 |
| C  | 1.43182  | 0.00000  | -0.06345 |
| C  | 0.71600  | -1.24015 | -0.03007 |
| C  | -0.71591 | -1.23999 | -0.06345 |
| C  | -1.43200 | 0.00000  | -0.03007 |
| C  | -0.71591 | 1.23999  | -0.06345 |
| C  | 1.47211  | 2.54977  | 0.01852  |
| C  | -1.47082 | 2.54754  | -0.16722 |
| C  | 2.94164  | 0.00000  | -0.16722 |
| C  | 1.47211  | -2.54977 | 0.01852  |
| C  | -1.47082 | -2.54754 | -0.16722 |
| C  | -2.94422 | 0.00000  | 0.01852  |
| Ga | 0.00000  | 0.00000  | 2.29154  |
| H  | 2.44365  | 2.44816  | 0.54073  |
| H  | 1.68846  | 2.92449  | -1.00881 |
| H  | 0.89834  | 3.34034  | 0.54073  |
| H  | -2.42535 | 2.41975  | -0.71411 |
| H  | -1.71841 | 2.97637  | 0.83103  |
| H  | -0.88289 | 3.31029  | -0.71411 |
| H  | 3.30824  | 0.89054  | -0.71411 |
| H  | 3.43682  | 0.00000  | 0.83103  |
| H  | 3.30824  | -0.89054 | -0.71411 |
| H  | 2.44365  | -2.44816 | 0.54073  |
| H  | 0.89834  | -3.34034 | 0.54073  |
| H  | 1.68846  | -2.92449 | -1.00881 |
| H  | -0.88289 | -3.31029 | -0.71411 |
| H  | -1.71841 | -2.97637 | 0.83103  |
| H  | -2.42535 | -2.41975 | -0.71411 |
| H  | -3.34199 | -0.89218 | 0.54073  |
| H  | -3.34199 | 0.89218  | 0.54073  |
| H  | -3.37692 | 0.00000  | -1.00881 |

### Vibrational analysis

| mode | symmetry | wave number<br>cm <sup>**(-1)</sup> | IR intensity<br>km/mol | selection rules |       |
|------|----------|-------------------------------------|------------------------|-----------------|-------|
|      |          |                                     |                        | IR              | RAMAN |
| 1    |          | -0.00                               | 0.00000                | -               | -     |
| 2    |          | 0.00                                | 0.00000                | -               | -     |
| 3    |          | 0.00                                | 0.00000                | -               | -     |
| 4    |          | 0.00                                | 0.00000                | -               | -     |
| 5    |          | 0.00                                | 0.00000                | -               | -     |
| 6    |          | 0.00                                | 0.00000                | -               | -     |
| 7    | a2       | 17.10                               | 0.00000                | NO              | NO    |

|    |    |         |          |     |     |
|----|----|---------|----------|-----|-----|
| 8  | e  | 39.29   | 0.40972  | YES | YES |
| 9  | e  | 39.29   | 0.40972  | YES | YES |
| 10 | e  | 95.69   | 0.02304  | YES | YES |
| 11 | e  | 95.69   | 0.02304  | YES | YES |
| 12 | e  | 110.47  | 0.10515  | YES | YES |
| 13 | e  | 110.47  | 0.10515  | YES | YES |
| 14 | a2 | 133.38  | 0.00000  | NO  | NO  |
| 15 | e  | 145.87  | 0.59474  | YES | YES |
| 16 | e  | 145.87  | 0.59474  | YES | YES |
| 17 | a1 | 162.14  | 0.04559  | YES | YES |
| 18 | a1 | 168.64  | 0.25698  | YES | YES |
| 19 | e  | 342.61  | 0.13378  | YES | YES |
| 20 | e  | 342.61  | 0.13378  | YES | YES |
| 21 | a1 | 355.03  | 58.38031 | YES | YES |
| 22 | e  | 381.99  | 0.18164  | YES | YES |
| 23 | e  | 381.99  | 0.18164  | YES | YES |
| 24 | e  | 405.37  | 0.00392  | YES | YES |
| 25 | e  | 405.37  | 0.00392  | YES | YES |
| 26 | e  | 443.47  | 0.00282  | YES | YES |
| 27 | e  | 443.47  | 0.00282  | YES | YES |
| 28 | a2 | 445.45  | 0.00000  | NO  | NO  |
| 29 | a1 | 554.53  | 0.02623  | YES | YES |
| 30 | e  | 554.73  | 2.01013  | YES | YES |
| 31 | e  | 554.73  | 2.01013  | YES | YES |
| 32 | a2 | 573.50  | 0.00000  | NO  | NO  |
| 33 | a1 | 582.40  | 1.63982  | YES | YES |
| 34 | a1 | 681.61  | 0.34470  | YES | YES |
| 35 | e  | 797.63  | 3.18282  | YES | YES |
| 36 | e  | 797.63  | 3.18282  | YES | YES |
| 37 | e  | 958.63  | 0.00605  | YES | YES |
| 38 | e  | 958.63  | 0.00605  | YES | YES |
| 39 | a1 | 974.40  | 1.47265  | YES | YES |
| 40 | a2 | 975.95  | 0.00000  | NO  | NO  |
| 41 | e  | 999.64  | 0.35826  | YES | YES |
| 42 | e  | 999.64  | 0.35826  | YES | YES |
| 43 | e  | 1023.60 | 6.37292  | YES | YES |
| 44 | e  | 1023.60 | 6.37292  | YES | YES |
| 45 | a1 | 1025.73 | 0.09295  | YES | YES |
| 46 | e  | 1054.11 | 15.66944 | YES | YES |
| 47 | e  | 1054.11 | 15.66944 | YES | YES |
| 48 | a2 | 1076.05 | 0.00000  | NO  | NO  |
| 49 | e  | 1076.90 | 0.01781  | YES | YES |
| 50 | e  | 1076.90 | 0.01781  | YES | YES |
| 51 | a1 | 1259.21 | 0.75813  | YES | YES |
| 52 | a1 | 1308.15 | 11.04513 | YES | YES |
| 53 | a2 | 1317.65 | 0.00000  | NO  | NO  |
| 54 | e  | 1359.07 | 0.24696  | YES | YES |
| 55 | e  | 1359.07 | 0.24696  | YES | YES |
| 56 | a1 | 1366.04 | 3.67542  | YES | YES |
| 57 | e  | 1366.58 | 21.64440 | YES | YES |
| 58 | e  | 1366.58 | 21.64440 | YES | YES |
| 59 | a1 | 1372.68 | 3.32361  | YES | YES |
| 60 | e  | 1378.72 | 9.47173  | YES | YES |
| 61 | e  | 1378.72 | 9.47173  | YES | YES |
| 62 | e  | 1398.03 | 0.15370  | YES | YES |

|    |    |         |          |     |     |
|----|----|---------|----------|-----|-----|
| 63 | e  | 1398.03 | 0.15370  | YES | YES |
| 64 | a1 | 1416.50 | 67.35523 | YES | YES |
| 65 | a2 | 1417.77 | 0.00000  | NO  | NO  |
| 66 | a2 | 1428.30 | 0.00000  | NO  | NO  |
| 67 | e  | 1434.07 | 0.08650  | YES | YES |
| 68 | e  | 1434.07 | 0.08650  | YES | YES |
| 69 | e  | 1444.20 | 81.64438 | YES | YES |
| 70 | e  | 1444.20 | 81.64438 | YES | YES |
| 71 | e  | 1464.00 | 0.10035  | YES | YES |
| 72 | e  | 1464.00 | 0.10035  | YES | YES |
| 73 | a1 | 1479.00 | 0.00673  | YES | YES |
| 74 | e  | 1538.80 | 0.22939  | YES | YES |
| 75 | e  | 1538.80 | 0.22939  | YES | YES |
| 76 | a1 | 2952.12 | 0.00919  | YES | YES |
| 77 | e  | 2952.45 | 1.44287  | YES | YES |
| 78 | e  | 2952.45 | 1.44287  | YES | YES |
| 79 | e  | 2953.95 | 0.55182  | YES | YES |
| 80 | e  | 2953.95 | 0.55182  | YES | YES |
| 81 | a1 | 2954.73 | 0.10959  | YES | YES |
| 82 | a1 | 3040.81 | 1.92025  | YES | YES |
| 83 | e  | 3042.37 | 0.76562  | YES | YES |
| 84 | e  | 3042.37 | 0.76562  | YES | YES |
| 85 | e  | 3047.27 | 2.00782  | YES | YES |
| 86 | e  | 3047.27 | 2.00782  | YES | YES |
| 87 | a1 | 3049.78 | 0.46181  | YES | YES |
| 88 | a2 | 3071.98 | 0.00000  | NO  | NO  |
| 89 | e  | 3075.33 | 4.90670  | YES | YES |
| 90 | e  | 3075.33 | 4.90670  | YES | YES |
| 91 | e  | 3082.19 | 0.08931  | YES | YES |
| 92 | e  | 3082.19 | 0.08931  | YES | YES |
| 93 | a2 | 3084.04 | 0.00000  | NO  | NO  |

[In(HMB)]<sup>+</sup>

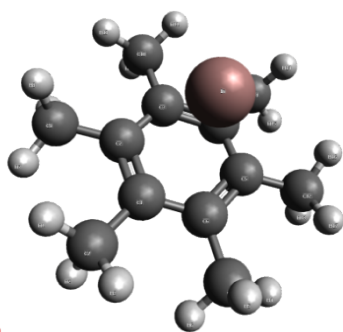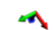

Atomic coordinates

|   |            |            |            |
|---|------------|------------|------------|
| C | 0.3666003  | 1.3837988  | 0.0218599  |
| C | -1.0137973 | 1.0102967  | 0.0502848  |
| C | -1.3817050 | -0.3744142 | 0.0218599  |
| C | -0.3680439 | -1.3831226 | 0.0502848  |
| C | 1.0151047  | -1.0093845 | 0.0218599  |
| C | 1.3818413  | 0.3728259  | 0.0502848  |
| C | 0.7682516  | 2.8434543  | -0.0016915 |
| C | 2.8345355  | 0.7851011  | 0.1678604  |

|    |            |            |            |
|----|------------|------------|------------|
| C  | -2.0971852 | 2.0622292  | 0.1678604  |
| C  | -2.8466294 | -0.7564017 | -0.0016915 |
| C  | -0.7373503 | -2.8473302 | 0.1678604  |
| C  | 2.0783778  | -2.0870525 | -0.0016915 |
| In | 0.0000000  | 0.0000000  | -2.5706268 |
| H  | 0.0305095  | 3.4712954  | -0.5391957 |
| H  | 0.8549253  | 3.2516176  | 1.0320829  |
| H  | 1.7494979  | 2.9958453  | -0.4924493 |
| H  | 3.4730782  | -0.0396070 | 0.5357104  |
| H  | 3.2620635  | 1.1292891  | -0.8016013 |
| H  | 2.9464114  | 1.6250738  | 0.8840150  |
| H  | -1.7022384 | 3.0275774  | 0.5357104  |
| H  | -2.6090248 | 2.2603853  | -0.8016013 |
| H  | -2.8805609 | 1.7391302  | 0.8840150  |
| H  | -3.4692270 | 0.0171870  | -0.4924493 |
| H  | -3.0214847 | -1.7092257 | -0.5391957 |
| H  | -3.2434461 | -0.8854218 | 1.0320829  |
| H  | -1.7708398 | -2.9879704 | 0.5357104  |
| H  | -0.6530387 | -3.3896744 | -0.8016013 |
| H  | -0.0658505 | -3.3642040 | 0.8840150  |
| H  | 1.7197292  | -3.0130322 | -0.4924493 |
| H  | 2.9909752  | -1.7620697 | -0.5391957 |
| H  | 2.3885208  | -2.3661958 | 1.0320829  |

#### Vibrational analysis

| mode | symmetry | wave number<br>cm <sup>**</sup> (-1) | IR intensity<br>km/mol | selection rules |       |
|------|----------|--------------------------------------|------------------------|-----------------|-------|
|      |          |                                      |                        | IR              | RAMAN |
| 1    |          | -0.00                                | 0.00000                | -               | -     |
| 2    |          | -0.00                                | 0.00000                | -               | -     |
| 3    |          | -0.00                                | 0.00000                | -               | -     |
| 4    |          | -0.00                                | 0.00000                | -               | -     |
| 5    |          | 0.00                                 | 0.00000                | -               | -     |
| 6    |          | 0.00                                 | 0.00000                | -               | -     |
| 7    | e        | 63.36                                | 0.15536                | YES             | YES   |
| 8    | e        | 63.36                                | 0.15536                | YES             | YES   |
| 9    | a        | 63.91                                | 0.69001                | YES             | YES   |
| 10   | e        | 80.65                                | 0.01268                | YES             | YES   |
| 11   | e        | 80.65                                | 0.01268                | YES             | YES   |
| 12   | e        | 116.64                               | 0.08450                | YES             | YES   |
| 13   | e        | 116.64                               | 0.08450                | YES             | YES   |
| 14   | a        | 127.47                               | 0.02175                | YES             | YES   |
| 15   | e        | 143.75                               | 0.48247                | YES             | YES   |
| 16   | e        | 143.75                               | 0.48247                | YES             | YES   |
| 17   | a        | 154.02                               | 0.16327                | YES             | YES   |
| 18   | a        | 168.94                               | 0.02109                | YES             | YES   |
| 19   | a        | 319.50                               | 55.67923               | YES             | YES   |
| 20   | e        | 341.11                               | 0.19766                | YES             | YES   |
| 21   | e        | 341.11                               | 0.19766                | YES             | YES   |
| 22   | e        | 375.47                               | 0.38772                | YES             | YES   |
| 23   | e        | 375.47                               | 0.38772                | YES             | YES   |
| 24   | e        | 403.47                               | 0.01758                | YES             | YES   |
| 25   | e        | 403.47                               | 0.01758                | YES             | YES   |
| 26   | a        | 442.06                               | 0.02164                | YES             | YES   |
| 27   | e        | 443.58                               | 0.00779                | YES             | YES   |
| 28   | e        | 443.58                               | 0.00779                | YES             | YES   |

|    |   |         |          |     |     |
|----|---|---------|----------|-----|-----|
| 29 | a | 553.10  | 0.71898  | YES | YES |
| 30 | e | 560.74  | 1.58312  | YES | YES |
| 31 | e | 560.74  | 1.58312  | YES | YES |
| 32 | a | 570.54  | 0.01602  | YES | YES |
| 33 | a | 581.74  | 1.40352  | YES | YES |
| 34 | a | 689.44  | 0.31655  | YES | YES |
| 35 | e | 795.85  | 4.03007  | YES | YES |
| 36 | e | 795.85  | 4.03007  | YES | YES |
| 37 | e | 957.43  | 0.32185  | YES | YES |
| 38 | e | 957.43  | 0.32185  | YES | YES |
| 39 | a | 973.23  | 0.02270  | YES | YES |
| 40 | a | 976.06  | 1.77019  | YES | YES |
| 41 | e | 999.87  | 1.02606  | YES | YES |
| 42 | e | 999.87  | 1.02606  | YES | YES |
| 43 | e | 1024.05 | 5.07655  | YES | YES |
| 44 | e | 1024.05 | 5.07655  | YES | YES |
| 45 | a | 1024.84 | 0.06914  | YES | YES |
| 46 | e | 1052.84 | 14.23618 | YES | YES |
| 47 | e | 1052.84 | 14.23618 | YES | YES |
| 48 | e | 1076.14 | 0.15584  | YES | YES |
| 49 | e | 1076.14 | 0.15584  | YES | YES |
| 50 | a | 1076.34 | 0.32286  | YES | YES |
| 51 | a | 1257.78 | 0.59222  | YES | YES |
| 52 | a | 1301.86 | 12.13487 | YES | YES |
| 53 | a | 1314.90 | 4.38497  | YES | YES |
| 54 | e | 1359.62 | 0.01585  | YES | YES |
| 55 | e | 1359.62 | 0.01585  | YES | YES |
| 56 | e | 1366.14 | 19.28903 | YES | YES |
| 57 | e | 1366.14 | 19.28903 | YES | YES |
| 58 | a | 1366.98 | 1.93926  | YES | YES |
| 59 | a | 1373.80 | 1.61410  | YES | YES |
| 60 | e | 1380.89 | 10.66879 | YES | YES |
| 61 | e | 1380.89 | 10.66879 | YES | YES |
| 62 | e | 1401.37 | 2.06593  | YES | YES |
| 63 | e | 1401.37 | 2.06593  | YES | YES |
| 64 | a | 1414.57 | 52.81971 | YES | YES |
| 65 | a | 1418.18 | 2.54136  | YES | YES |
| 66 | a | 1432.67 | 12.24236 | YES | YES |
| 67 | e | 1432.97 | 1.38001  | YES | YES |
| 68 | e | 1432.97 | 1.38001  | YES | YES |
| 69 | e | 1443.51 | 68.92992 | YES | YES |
| 70 | e | 1443.51 | 68.92992 | YES | YES |
| 71 | e | 1462.58 | 3.44274  | YES | YES |
| 72 | e | 1462.58 | 3.44274  | YES | YES |
| 73 | a | 1477.15 | 0.04358  | YES | YES |
| 74 | e | 1540.09 | 0.60628  | YES | YES |
| 75 | e | 1540.09 | 0.60628  | YES | YES |
| 76 | a | 2951.24 | 0.07607  | YES | YES |
| 77 | e | 2951.32 | 3.59803  | YES | YES |
| 78 | e | 2951.32 | 3.59803  | YES | YES |
| 79 | e | 2953.29 | 2.47249  | YES | YES |
| 80 | e | 2953.29 | 2.47249  | YES | YES |
| 81 | a | 2953.81 | 0.03569  | YES | YES |
| 82 | a | 3034.32 | 3.16001  | YES | YES |
| 83 | e | 3035.26 | 0.14199  | YES | YES |

|    |   |         |         |     |     |
|----|---|---------|---------|-----|-----|
| 84 | e | 3035.26 | 0.14199 | YES | YES |
| 85 | e | 3042.02 | 2.65967 | YES | YES |
| 86 | e | 3042.02 | 2.65967 | YES | YES |
| 87 | a | 3043.46 | 0.04502 | YES | YES |
| 88 | a | 3071.45 | 0.06419 | YES | YES |
| 89 | e | 3073.14 | 4.90370 | YES | YES |
| 90 | e | 3073.14 | 4.90370 | YES | YES |
| 91 | e | 3087.10 | 2.87759 | YES | YES |
| 92 | e | 3087.10 | 2.87759 | YES | YES |
| 93 | a | 3087.74 | 0.38896 | YES | YES |

[Tl(HMB)]<sup>+</sup>

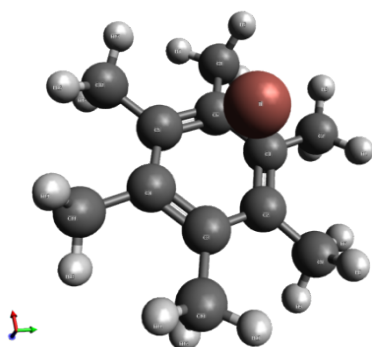

Atomic coordinates

|    |          |          |          |
|----|----------|----------|----------|
| C  | 0.36616  | 1.38255  | 0.01930  |
| C  | -1.01300 | 1.00939  | 0.04666  |
| C  | -1.38041 | -0.37418 | 0.01930  |
| C  | -0.36766 | -1.38198 | 0.04666  |
| C  | 1.01425  | -1.00838 | 0.01930  |
| C  | 1.38066  | 0.37258  | 0.04666  |
| C  | 0.76828  | 2.84281  | 0.00155  |
| C  | 2.83350  | 0.78521  | 0.17040  |
| C  | -2.09676 | 2.06128  | 0.17040  |
| C  | -2.84608 | -0.75605 | 0.00155  |
| C  | -0.73674 | -2.84648 | 0.17040  |
| C  | 2.07780  | -2.08675 | 0.00155  |
| Tl | 0.00000  | 0.00000  | -2.65388 |
| H  | 0.03096  | 3.47350  | -0.53334 |
| H  | 0.85567  | 3.24827  | 1.03634  |
| H  | 1.74970  | 2.99728  | -0.48853 |
| H  | 3.47115  | -0.03999 | 0.53892  |
| H  | 3.26619  | 1.13244  | -0.79573 |
| H  | 2.94326  | 1.62316  | 0.88931  |
| H  | -1.70094 | 3.02609  | 0.53892  |
| H  | -2.61382 | 2.26238  | -0.79573 |
| H  | -2.87733 | 1.73736  | 0.88931  |
| H  | -3.47057 | 0.01665  | -0.48853 |
| H  | -3.02362 | -1.70994 | -0.53334 |
| H  | -3.24092 | -0.88310 | 1.03634  |
| H  | -1.77020 | -2.98611 | 0.53892  |
| H  | -0.65237 | -3.39482 | -0.79573 |
| H  | -0.06593 | -3.36052 | 0.88931  |
| H  | 1.72087  | -3.01392 | -0.48853 |

|   |         |          |          |
|---|---------|----------|----------|
| H | 2.99266 | -1.76356 | -0.53334 |
| H | 2.38525 | -2.36516 | 1.03634  |

Vibrational analysis

| mode | symmetry | wave number<br>cm <sup>**</sup> (-1) | IR intensity<br>km/mol | selection rules |       |
|------|----------|--------------------------------------|------------------------|-----------------|-------|
|      |          |                                      |                        | IR              | RAMAN |
| 1    |          | -0.00                                | 0.00000                | -               | -     |
| 2    |          | -0.00                                | 0.00000                | -               | -     |
| 3    |          | -0.00                                | 0.00000                | -               | -     |
| 4    |          | 0.00                                 | 0.00000                | -               | -     |
| 5    |          | 0.00                                 | 0.00000                | -               | -     |
| 6    |          | 0.00                                 | 0.00000                | -               | -     |
| 7    | a        | 60.39                                | 0.70805                | YES             | YES   |
| 8    | e        | 60.39                                | 0.19844                | YES             | YES   |
| 9    | e        | 60.39                                | 0.19844                | YES             | YES   |
| 10   | e        | 73.06                                | 0.00644                | YES             | YES   |
| 11   | e        | 73.06                                | 0.00644                | YES             | YES   |
| 12   | e        | 114.73                               | 0.06845                | YES             | YES   |
| 13   | e        | 114.73                               | 0.06845                | YES             | YES   |
| 14   | a        | 123.12                               | 0.07466                | YES             | YES   |
| 15   | a        | 126.48                               | 0.39903                | YES             | YES   |
| 16   | e        | 141.84                               | 0.46741                | YES             | YES   |
| 17   | e        | 141.84                               | 0.46741                | YES             | YES   |
| 18   | a        | 166.62                               | 0.28166                | YES             | YES   |
| 19   | a        | 260.30                               | 42.54619               | YES             | YES   |
| 20   | e        | 340.87                               | 0.29990                | YES             | YES   |
| 21   | e        | 340.87                               | 0.29990                | YES             | YES   |
| 22   | e        | 371.38                               | 0.15785                | YES             | YES   |
| 23   | e        | 371.38                               | 0.15785                | YES             | YES   |
| 24   | e        | 403.32                               | 0.01471                | YES             | YES   |
| 25   | e        | 403.32                               | 0.01471                | YES             | YES   |
| 26   | a        | 441.94                               | 0.02767                | YES             | YES   |
| 27   | e        | 443.86                               | 0.00306                | YES             | YES   |
| 28   | e        | 443.86                               | 0.00306                | YES             | YES   |
| 29   | a        | 551.69                               | 1.25437                | YES             | YES   |
| 30   | e        | 566.86                               | 1.79321                | YES             | YES   |
| 31   | e        | 566.86                               | 1.79321                | YES             | YES   |
| 32   | a        | 570.34                               | 0.02776                | YES             | YES   |
| 33   | a        | 581.80                               | 1.27091                | YES             | YES   |
| 34   | a        | 697.13                               | 0.32428                | YES             | YES   |
| 35   | e        | 795.74                               | 3.60868                | YES             | YES   |
| 36   | e        | 795.74                               | 3.60868                | YES             | YES   |
| 37   | e        | 957.32                               | 0.35311                | YES             | YES   |
| 38   | e        | 957.32                               | 0.35311                | YES             | YES   |
| 39   | a        | 972.53                               | 0.00258                | YES             | YES   |
| 40   | a        | 975.58                               | 2.19303                | YES             | YES   |
| 41   | e        | 1000.01                              | 0.93577                | YES             | YES   |
| 42   | e        | 1000.01                              | 0.93577                | YES             | YES   |
| 43   | e        | 1025.40                              | 5.38191                | YES             | YES   |
| 44   | e        | 1025.40                              | 5.38191                | YES             | YES   |
| 45   | a        | 1027.20                              | 0.06546                | YES             | YES   |
| 46   | e        | 1052.25                              | 14.60630               | YES             | YES   |
| 47   | e        | 1052.25                              | 14.60630               | YES             | YES   |
| 48   | e        | 1075.65                              | 0.17913                | YES             | YES   |
| 49   | e        | 1075.65                              | 0.17913                | YES             | YES   |



|    |   |         |          |     |     |
|----|---|---------|----------|-----|-----|
| 50 | a | 1076.20 | 0.32599  | YES | YES |
| 51 | a | 1256.23 | 0.56791  | YES | YES |
| 52 | a | 1300.25 | 13.67261 | YES | YES |
| 53 | a | 1315.42 | 3.31159  | YES | YES |
| 54 | e | 1360.09 | 0.20497  | YES | YES |
| 55 | e | 1360.09 | 0.20497  | YES | YES |
| 56 | e | 1367.02 | 15.61416 | YES | YES |
| 57 | e | 1367.02 | 15.61416 | YES | YES |
| 58 | a | 1367.13 | 1.05155  | YES | YES |
| 59 | a | 1374.87 | 1.73172  | YES | YES |
| 60 | e | 1382.73 | 8.44395  | YES | YES |
| 61 | e | 1382.73 | 8.44395  | YES | YES |
| 62 | e | 1402.75 | 1.98370  | YES | YES |
| 63 | e | 1402.75 | 1.98370  | YES | YES |
| 64 | a | 1414.80 | 53.11522 | YES | YES |
| 65 | a | 1418.78 | 1.32809  | YES | YES |
| 66 | e | 1433.28 | 1.25467  | YES | YES |
| 67 | e | 1433.28 | 1.25467  | YES | YES |
| 68 | a | 1433.43 | 11.85460 | YES | YES |
| 69 | e | 1444.48 | 66.23854 | YES | YES |
| 70 | e | 1444.48 | 66.23854 | YES | YES |
| 71 | e | 1462.65 | 3.48599  | YES | YES |
| 72 | e | 1462.65 | 3.48599  | YES | YES |
| 73 | a | 1477.13 | 0.00821  | YES | YES |
| 74 | e | 1543.60 | 0.57413  | YES | YES |
| 75 | e | 1543.60 | 0.57413  | YES | YES |
| 76 | a | 2950.28 | 0.11260  | YES | YES |
| 77 | e | 2950.35 | 5.77681  | YES | YES |
| 78 | e | 2950.35 | 5.77681  | YES | YES |
| 79 | e | 2952.12 | 3.23338  | YES | YES |
| 80 | e | 2952.12 | 3.23338  | YES | YES |
| 81 | a | 2952.67 | 0.00007  | YES | YES |
| 82 | a | 3032.69 | 4.48845  | YES | YES |
| 83 | e | 3033.69 | 0.21129  | YES | YES |
| 84 | e | 3033.69 | 0.21129  | YES | YES |
| 85 | e | 3040.13 | 3.02094  | YES | YES |
| 86 | e | 3040.13 | 3.02094  | YES | YES |
| 87 | a | 3041.66 | 0.04557  | YES | YES |
| 88 | a | 3069.14 | 0.07450  | YES | YES |
| 89 | e | 3070.86 | 6.10208  | YES | YES |
| 90 | e | 3070.86 | 6.10208  | YES | YES |
| 91 | e | 3085.74 | 3.32557  | YES | YES |
| 92 | e | 3085.74 | 3.32557  | YES | YES |
| 93 | a | 3086.33 | 0.43237  | YES | YES |

## S-4References

- 1 J. Cosier and A. M. Glazer, *J. Appl. Crystallogr.*, 1986, **19**, 105–107.
- 2 a) G. M. Sheldrick, *Acta Crystallogr., Sect. A: Found. Crystallogr.*, 2008, **64**, 112–122; b) D. Kratzert, J. J. Holstein and I. Krossing, *J. Appl. Crystallogr.*, 2015, **48**, 933–938;
- 3 Daniel Kratzert, available at: <https://www.xs3.uni-freiburg.de/research/finalcif>.
- 4 G. R. Fulmer, A. J. M. Miller, N. H. Sherden, H. E. Gottlieb, A. Nudelman, B. M. Stoltz, J. E. Bercaw and K. I. Goldberg, *Organometallics*, 2010, **29**, 2176–2179.
- 5 a) M. von Arnim and R. Ahlrichs, *J. Chem. Phys.*, 1999, **111**, 9183–9190; b) Becke, *Physical review. A, General physics*, 1988, **38**, 3098–3100; c) A. Schäfer, H. Horn and R. Ahlrichs, *J. Chem. Phys.*, 1992, **97**, 2571–2577; d) H. Schröder, A. Creon and T. Schwabe, *J. Chem. Theory Comput.*, 2015, **11**, 3163–3170; e) R. Ahlrichs, M. Bär, M. Häser, H. Horn and C. Kölmel, *Chem. Phys. Lett.*, 1989, **162**, 165–169;
- 6 P. Deglmann, F. Furche and R. Ahlrichs, *Chem. Phys. Lett.*, 2002, **362**, 511–518.
- 7 A. E. Reed, R. B. Weinstock and F. Weinhold, *J. Chem. Phys.*, 1985, **83**, 735–746.
- 8 C. Ehrhardt and R. Ahlrichs, *Theor. Chim. Acta*, 1985, **68**, 231–245.
- 9 R. F. W. Bader, *Chem. Rev.*, 1991, **91**, 893–928.
- 10 T. Lu and F. Chen, *J. Comput. Chem.*, 2012, **33**, 580–592.
- 11 A. Klamt and G. Schüürmann, *J. Chem. Soc., Perkin Trans. 2*, 1993, 799–805.
- 12 M. Schorpp, S. Rein, S. Weber, H. Scherer and I. Krossing, *Chem. Commun.*, 2018, **54**, 10036–10039.
